# Supplementary material for: Regulation of protein complex partners as a compensatory mechanism in aneuploid tumors
Source: eLife journal article supplement (doi:10.7554/elife.75526), 2022-05-16

**A**

Methylation levels of downregulated genes on other chromosomes in amplification cases

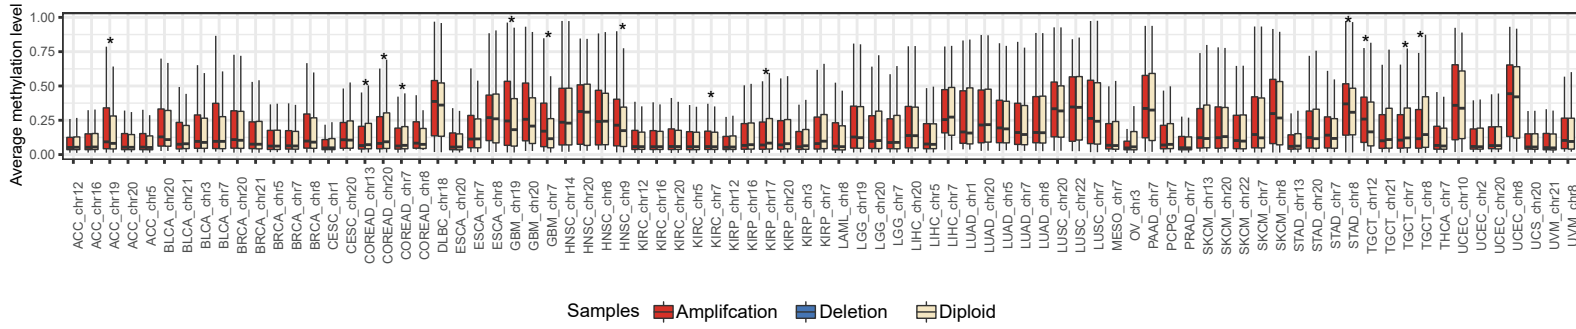

Methylation levels of downregulated genes on other chromosomes in deletion cases

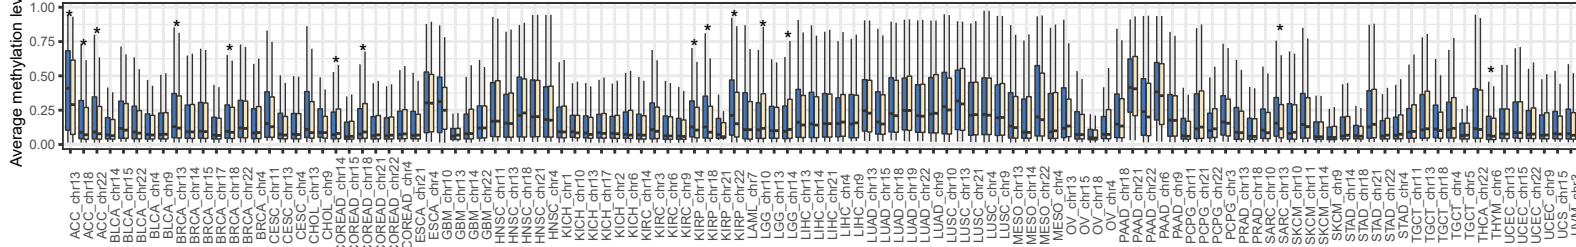**B**

Methylation levels of upregulated genes on other chromosomes in amplification cases

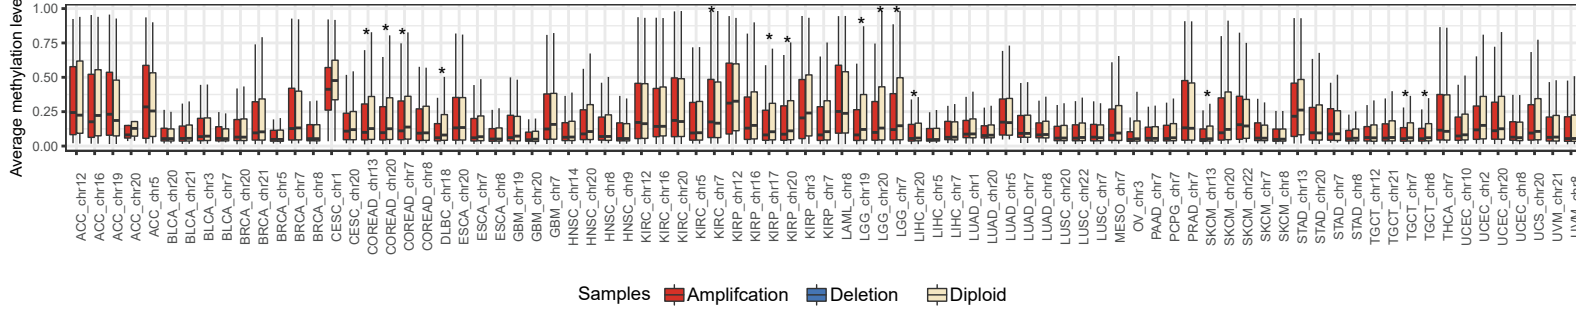

Methylation levels of upregulated genes on other chromosomes in deletion cases

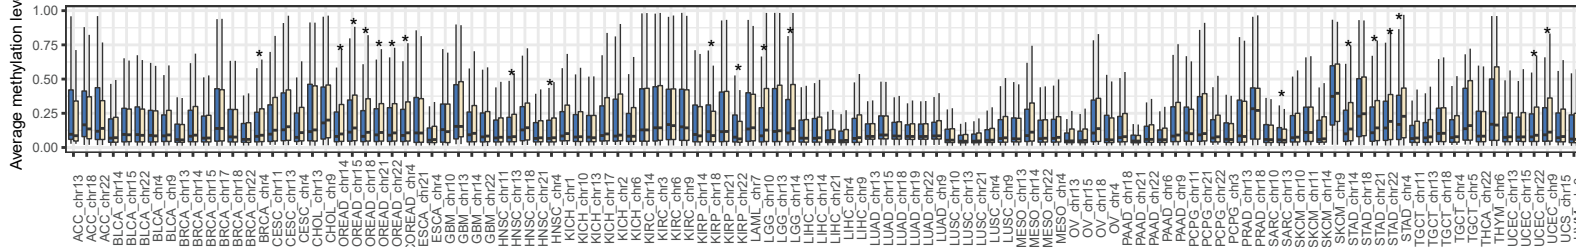**C**

Amplification

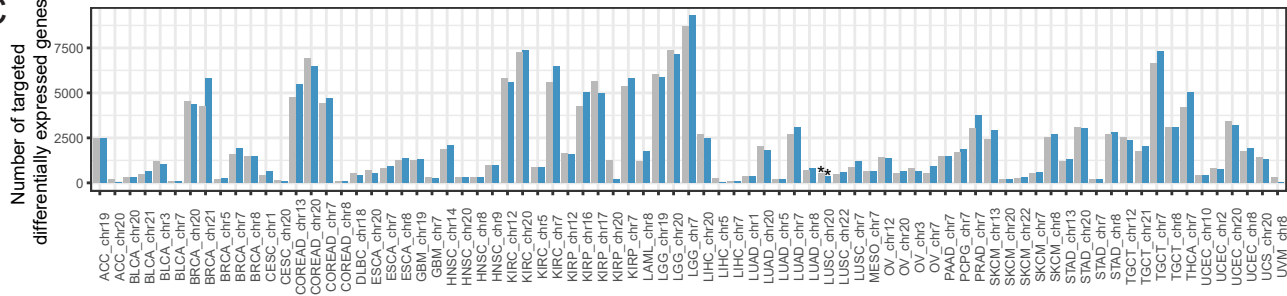

Value

Expected

Observed

Deletion

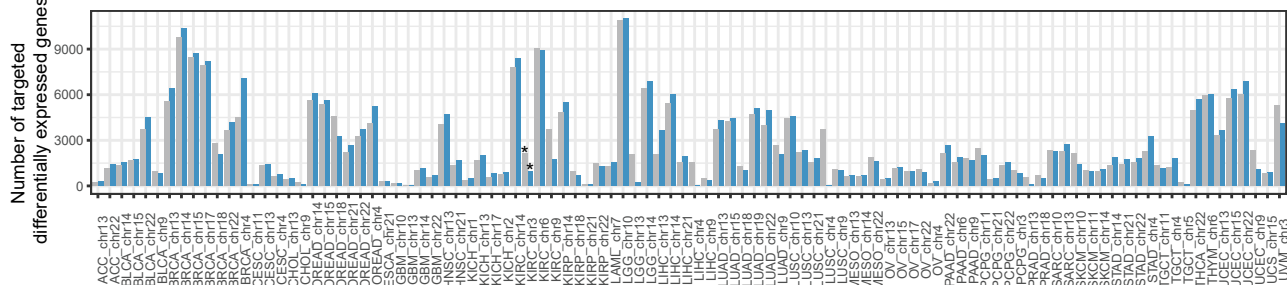

Supplement: supp [file elife-75526-supp-v1.zip]
