# Supplementary material for: Regulation of protein complex partners as a compensatory mechanism in aneuploid tumors
Source: eLife journal article supplement (doi:10.7554/elife.75526), 2022-05-16

A

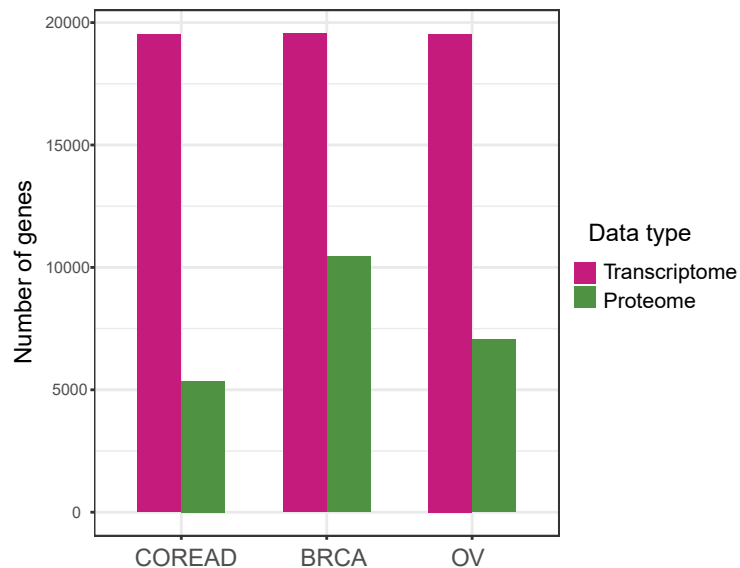

B

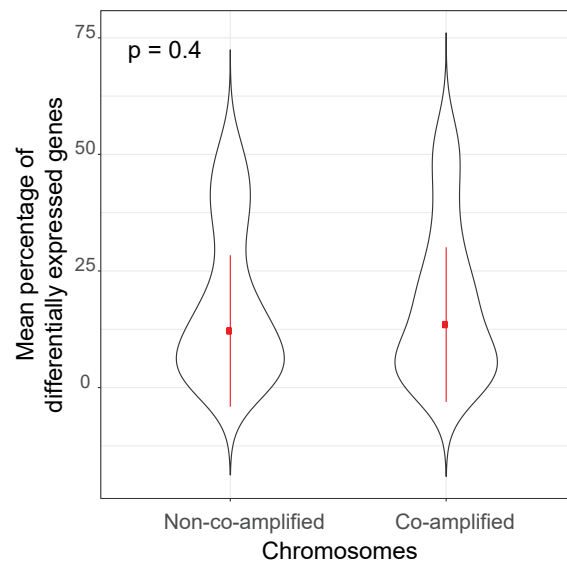

C

### Transcriptomic changes in THCA chr7 amplification

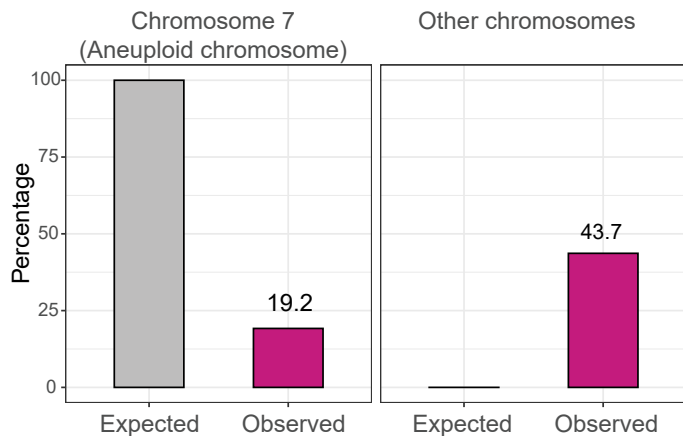

### Percentage of DEGs on other chromosomes upon chr7 amplification

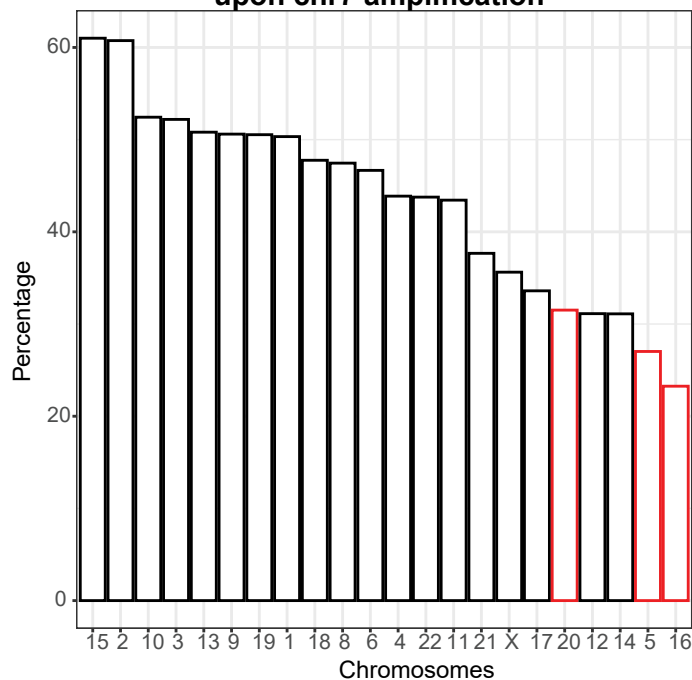

Supplement: supp [file elife-75526-supp-v1.zip]
