# Supplementary material for: Regulation of protein complex partners as a compensatory mechanism in aneuploid tumors
Source: eLife. 2022 May 16;11:e75526. doi: 10.7554/eLife.75526 (PMC9135399; doi:10.7554/eLife.75526)
Supplement: Supplementary file 1. [file elife-75526-supp1.xlsx]

## Sheet: Aneuploidy scores
Whole chromosome-level aneuploidy scores
Sample	Cancer type	chr1	chr2	chr3	chr4	chr5	chr6	chr7	chr8	chr9	chr10	chr11	chr12	chr13	chr14	chr15	chr16	chr17	chr18	chr19	chr20	chr21	chr22
TCGA-18-3406-01	LUSC		0			0				-1		0			0	-1	0		0		0	0	0
TCGA-18-3407-01	LUSC		1			0		1	1	1			-1	1	0	0	1		1		1	0	0
TCGA-18-3408-01	LUSC		0		0		0	0	0	0	0	0	0	0	0		0	0	0	0	0	0	1
TCGA-18-3410-01	LUSC	0	0		1		0	0	1				1	-1	-1		-1		0	1		1	0
TCGA-18-3411-01	LUSC		1					1				0	0		1		0		1				1
TCGA-18-3412-01	LUSC				-1							-1				-1	0				0	-1	0
TCGA-18-3414-01	LUSC				0		0	0	1		0		0	0	0				0		1	0	1
TCGA-18-3415-01	LUSC				-1			0							1					0		-1	0
TCGA-18-3416-01	LUSC												0	-1							-1	-1	0
TCGA-18-3417-01	LUSC				-1		-1	1				-1		-1	-1	0		0	-1		1		-1
TCGA-18-3419-01	LUSC	0			0	0				-1	0	0	0	-1	0				0	0			0
TCGA-18-3421-01	LUSC	0													1						0	0
TCGA-18-4083-01	LUSC						-1					0	0			1			1	0			-1
TCGA-18-4086-01	LUSC	0						0			0	0	0		0	0	0	0	0	0	0		0
TCGA-18-4721-01	LUSC		0									0	0	-1		0			0	0		-1	0
TCGA-18-5592-01	LUSC		0		-1									0	0	0	-1	0	0	0	0	0	0
TCGA-21-1071-01	LUSC		1		-1	1	0	0	0		0		1	-1	-1	0	1		-1		1	0	-1
TCGA-21-1072-01	LUSC		1						1					-1	0		1		0	0	0	-1	1
TCGA-21-1075-01	LUSC						0	1				0	0	-1	0	0	0		1	0	0	-1	1
TCGA-21-1076-01	LUSC	-1	1		-1			1			-1	-1	0	-1	1	1	-1	0	-1	1	1	-1	1
TCGA-21-1079-01	LUSC	0										1		1	1	1						-1	1
TCGA-21-1080-01	LUSC	0	0		-1		0	0					0	-1	0	-1						0	0
TCGA-21-1081-01	LUSC		0		-1					-1	-1	-1	-1	1	-1	-1			-1			1
TCGA-21-1082-01	LUSC						0		0	-1					0		0		0			0
TCGA-21-5782-01	LUSC							0								0				0		0	0
TCGA-21-5783-01	LUSC	0			0			1					0		0	0							-1
TCGA-21-5784-01	LUSC		0		0		0			0	0	0	0	0	-1	0	0	0	1		1	0	1
TCGA-21-5786-01	LUSC				-1					-1					0							-1	0
TCGA-21-5787-01	LUSC				-1									-1		-1			-1			-1	-1
TCGA-22-0940-01	LUSC							0	0	0				-1	-1			0	0		0		-1
TCGA-22-0944-01	LUSC						0		0	0		0	0	0	0						0	-1	0
TCGA-22-1000-01	LUSC	0	0		-1	0	0	0			-1	0	0		0	-1	0		-1	0	0	0	0
TCGA-22-1002-01	LUSC		0		0		0	0			0	0	0	0	0	0	-1		0	0	0	0	0
TCGA-22-1005-01	LUSC	0	0	0	0	0	0	0		-1		0	0	0	0	0	0	0			0	0	-1
TCGA-22-1011-01	LUSC	0		0	-1		-1		0	-1	-1		-1	-1	0	0	0	-1	-1	0	0	0	0
TCGA-22-1012-01	LUSC							1					1	0	-1		-1					-1
TCGA-22-1016-01	LUSC				0			-1		-1		-1		-1		-1		-1	-1	0		-1	-1
TCGA-22-1017-01	LUSC						0												-1		0	-1	0
TCGA-22-4591-01	LUSC	0										1		-1	1		0		0			-1	1
TCGA-22-4593-01	LUSC		-1						0	-1	-1	-1	0			0	0			0		-1	0
TCGA-22-4594-01	LUSC				-1							1				-1				-1	1	-1	-1
TCGA-22-4595-01	LUSC										-1				0	-1						0	0
TCGA-22-4596-01	LUSC		0		0	0	0			0	0	0	0	0	0	0	1	0	0	0		0	0
TCGA-22-4599-01	LUSC				-1		-1	1			-1				0	-1	-1					-1	0
TCGA-22-4601-01	LUSC				0						0	0	0	-1		0	0	0	0		0	0	0
TCGA-22-4604-01	LUSC							1			0	1		-1		1	0		1	1			1
TCGA-22-4605-01	LUSC	1			-1		1	1		0	0	0	0	-1	0	1	0		0		1	0	1
TCGA-22-4607-01	LUSC		0		-1			0	0	-1	0		0	-1	0	0	0		0		0	0	0
TCGA-22-4609-01	LUSC		0					0			-1	0	0	0	0	0	0		0	0			0
TCGA-22-4613-01	LUSC	0					0	0					0	-1	0	0					0	-1
TCGA-22-5471-01	LUSC												1	-1	1	-1	0						0
TCGA-22-5472-01	LUSC	0	0		-1		0	0	0		0	0	0	-1	0	0	0	-1	0	0	0	0	0
TCGA-22-5473-01	LUSC				-1							-1		-1		0					0	-1	0
TCGA-22-5474-01	LUSC				-1		0	0	0		0	0	0	0	0	0	0	0	0	0	0	-1	0
TCGA-22-5477-01	LUSC							0				-1		-1	-1				0	0		-1	1
TCGA-22-5478-01	LUSC	0					-1	1		-1	-1	-1	-1	-1	0	0	-1					-1
TCGA-22-5479-01	LUSC		1		-1		-1	1	1		-1				1	1	1		1	1	1	-1	1
TCGA-22-5480-01	LUSC				0	0	0	0		0	0	0	0	0	-1	-1	-1		0	0	0	0
TCGA-22-5481-01	LUSC												0	-1	-1								1
TCGA-22-5482-01	LUSC	0	0						1		0	0	0			0		0		0		0	1
TCGA-22-5483-01	LUSC		1		-1								0			1	0		1		1	-1	-1
TCGA-22-5485-01	LUSC		0		-1		0	0				0	0	-1	0	0		0	0		1	0	0
TCGA-22-5489-01	LUSC				-1	0	0	0	1			0			0	0					0	0	0
TCGA-22-5491-01	LUSC				-1			0			-1		0	-1		0			1	0		-1	1
TCGA-22-5492-01	LUSC	0			0					0	0	0	0	-1	0	0	0				0		-1
TCGA-22-A5C4-01	LUSC									-1			-1	-1	1		0			0	1	0	0
TCGA-33-4532-01	LUSC	-1			-1		-1	-1			-1	-1		-1					0			-1
TCGA-33-4533-01	LUSC				-1		0		0	0					1	-1	-1	0	0	0	0		0
TCGA-33-4538-01	LUSC				-1		0	1	0				1			1	0		-1		1	-1
TCGA-33-4547-01	LUSC	0	0							-1	0		0	0							0	-1	0
TCGA-33-4566-01	LUSC		0		-1						0			-1	0	0						0	-1
TCGA-33-4582-01	LUSC				-1					-1	-1				0	-1					0
TCGA-33-4583-01	LUSC				-1	1	0	1	1	1	0	1		0	0	1		0		1		1	-1
TCGA-33-4586-01	LUSC		0		-1		0	1			-1	0	1	-1								-1	1
TCGA-33-4587-01	LUSC		0		-1		1	0							-1	-1			0			1	-1
TCGA-33-4589-01	LUSC	-1			-1	-1				1	0		0	-1	1		0	0	-1	-1	1	-1	1
TCGA-33-6738-01	LUSC	0			0					-1				-1	0	0	0		-1		1	0
TCGA-33-A4WN-01	LUSC						0				0	0	0	-1	-1	0	0		0	0	0	0	0
TCGA-33-A5GW-01	LUSC		0				0				-1	0		-1		0	0		-1	0	0	0	0
TCGA-33-AAS8-01	LUSC		0		0			0			-1	0	0	-1	-1	0	0		0	0	0	-1	0
TCGA-33-AASB-01	LUSC		0					0							0	0			0	-1
TCGA-33-AASD-01	LUSC		1								-1			0	1	-1					1		1
TCGA-33-AASI-01	LUSC		0							-1	0		0	-1							0	-1	0
TCGA-33-AASJ-01	LUSC	0			-1		0							0		-1	-1		0			0
TCGA-33-AASL-01	LUSC		0										0				-1				0	-1
TCGA-34-2596-01	LUSC						-1				-1	-1	0	-1	-1	0	-1	0	0	0
TCGA-34-2600-01	LUSC		0		-1		0			-1	0	-1	0		-1		0	-1
TCGA-34-2604-01	LUSC	0			-1		-1	0		-1	0	0		-1	-1							-1	0
TCGA-34-2605-01	LUSC				-1			1		-1	-1	-1		-1	-1	1	0				1		1
TCGA-34-2608-01	LUSC	0	0		0		0	0	0		0	0	0	0	0	0	0		0		1	0	0
TCGA-34-2609-01	LUSC	-1								-1	0	-1		-1	-1	1						-1	0
TCGA-34-5231-01	LUSC					-1		1		-1	0		1	-1	0	1				1	1		1
TCGA-34-5232-01	LUSC	0	0			0		0	1	0	0	-1	0	-1	0	0	0	0	0	0	0	0	0
TCGA-34-5234-01	LUSC	0	0	0	0		-1		0	0	0	0	0	0	0	0	0	0	0	0	0		0
TCGA-34-5236-01	LUSC						0	1		0	-1	0	-1	0	0	0	-1				0		1
TCGA-34-5239-01	LUSC		0		0		0	0	1	1	0		1	0	0	0	-1	0	1	1	1	0	1
TCGA-34-5240-01	LUSC	0					-1	0	-1		-1	-1		-1	-1	1				1	1	1	1
TCGA-34-5241-01	LUSC	0	0				0			-1	0	0		-1	0	0					0	-1	0
TCGA-34-5927-01	LUSC	0	0		-1		0	0		0		0	0		-1	0		0	0		0	-1	0
TCGA-34-5928-01	LUSC				-1			1		-1		-1		-1	-1	-1			-1		0
TCGA-34-5929-01	LUSC	0	0		-1		0	0	0				0	-1	-1			0	0	0	0	0	0
TCGA-34-7107-01	LUSC				-1					1		0	1	-1		0	1	0				-1
TCGA-34-8454-01	LUSC	0			0		0	0					0		0		0				0		0
TCGA-34-8455-01	LUSC	1	1		0		0	0		-1	0		1		1	1			-1	0	1	-1	1
TCGA-34-8456-01	LUSC							1	0			1	0	-1	1		1				1	-1
TCGA-34-A5IX-01	LUSC	1						1		-1			-1		-1	0		-1		1	1	0	1
TCGA-37-3783-01	LUSC							1			0		0	0		0	0		0	0		0	0
TCGA-37-3789-01	LUSC	0	0				0						0	0	0		0				0		0
TCGA-37-3792-01	LUSC		0		-1		-1		-1		-1	-1		-1	0	0						-1	-1
TCGA-37-4129-01	LUSC	0	0		0	0	0	0	0	0	0	0	0	0	0	0	0	0	0	-1	0	0	-1
TCGA-37-4130-01	LUSC								-1	-1				1	-1		-1					-1	-1
TCGA-37-4132-01	LUSC	0	0		0		0	0		0	0	0	0		0	0	0				0	0	-1
TCGA-37-4133-01	LUSC				-1					1			0			-1			0				1
TCGA-37-4135-01	LUSC		0		-1					-1	-1			-1	-1	0	1			-1		-1	0
TCGA-37-4141-01	LUSC	0			-1		0	0		-1	0			0	0		0		0	-1	0	0
TCGA-37-5819-01	LUSC				-1										0	-1			0		1	-1	1
TCGA-37-A5EL-01	LUSC				-1																	-1	-1
TCGA-37-A5EN-01	LUSC				-1	-1		1				0				1			0		1	-1	1
TCGA-39-5011-01	LUSC	-1	0				0				-1				0	-1						-1	-1
TCGA-39-5016-01	LUSC						-1						0		-1	-1	-1					-1
TCGA-39-5019-01	LUSC	0	0		0	0	0	1			0	0	0	0		0			1		0	0
TCGA-39-5021-01	LUSC		0					0	0	0	0			0	-1	-1		0	1			0	1
TCGA-39-5022-01	LUSC	0			0			0	0	0		-1	0	-1	0	0	0		0	0	0	0	0
TCGA-39-5024-01	LUSC	0	0		0		0				0	0	0	0	0	0			0	0	0	0	0
TCGA-39-5027-01	LUSC		0		-1		-1						0	0	0	0	0			0	0		0
TCGA-39-5028-01	LUSC		-1		1	1				-1	1	1		-1	1		0		-1	1	1	1	1
TCGA-39-5029-01	LUSC				0							0		-1		-1	0	-1	0			-1
TCGA-39-5030-01	LUSC	0	0		0		0	0	0		-1	0	0	-1	-1	0			0	0	0	0	0
TCGA-39-5031-01	LUSC						-1						0	-1	1		1	0	1	1	0	-1	0
TCGA-39-5034-01	LUSC													0	0	-1			0		-1	-1	1
TCGA-39-5035-01	LUSC		1		-1						0		1	1	-1	0	0		0		0	0
TCGA-39-5036-01	LUSC	0			-1				0			0		-1	0	0	0	0	-1	-1	1	-1	0
TCGA-39-5037-01	LUSC				-1						-1				1	1						-1	1
TCGA-39-5039-01	LUSC	0	0		0		-1	0		0	0	0	0	0	0	0	0	-1	0		0	-1	1
TCGA-39-5040-01	LUSC		1		-1	0	0	0			0	0			-1	-1	-1		1			0	-1
TCGA-43-2576-01	LUSC		1				1				-1	1	1		0	0	1				1		1
TCGA-43-2578-01	LUSC				-1								0	-1	0								-1
TCGA-43-2581-01	LUSC		1		0					0	0	-1		-1	0	-1	0		0	0	0	0	-1
TCGA-43-3394-01	LUSC				-1			1				0	1		-1	1	-1		0			1
TCGA-43-3920-01	LUSC									-1		0	0	-1	0	0					1		1
TCGA-43-5668-01	LUSC	0	1	0	0									-1	0	-1						-1
TCGA-43-5670-01	LUSC	-1			-1				1	-1	0			-1	-1							-1
TCGA-43-6143-01	LUSC							0					0		1	0						1
TCGA-43-6647-01	LUSC	0	0					0		-1			0	-1	0	0	0	0	0	0	0	1	0
TCGA-43-6770-01	LUSC		0					0			-1			-1			0		0		0	0
TCGA-43-6771-01	LUSC	0	0	0	-1	0	0		0		0		1	0	0	0	0	0	0		0	0	0
TCGA-43-6773-01	LUSC			0	0	0	0	1	0	0	0	0	0	-1	0	0	0	0	0	0		0	0
TCGA-43-7656-01	LUSC	0	0				0	0		-1	0		0	-1	-1	0			-1			-1	0
TCGA-43-7657-01	LUSC				-1		0	1		-1	0		0	1	-1		-1	1	1		0		1
TCGA-43-7658-01	LUSC									1					-1	0			1	0	1	0	-1
TCGA-43-8115-01	LUSC				-1	0		0		-1		0			0	0	0				0	0	0
TCGA-43-8116-01	LUSC	0					0	0		-1			1							0	0	-1	0
TCGA-43-8118-01	LUSC													0	1								1
TCGA-43-A474-01	LUSC				-1											0						0	0
TCGA-43-A475-01	LUSC		0		0						0	0	1	0		1			1		0	1	1
TCGA-43-A56U-01	LUSC	0	0				0	0				0	0	0	0	0	-1	-1	0	0	0	0	0
TCGA-43-A56V-01	LUSC		0		-1			0		-1		0		0	0	-1	0		0		0	-1
TCGA-46-3765-01	LUSC				-1							0	0	-1	0		-1		0	0	0	0
TCGA-46-3766-01	LUSC	0	0		0		0	0		-1	0			-1	0	0	0	-1	0	0	0	0	0
TCGA-46-3767-01	LUSC	0					1		0	-1	0	-1		0	0		0	0	0	0		0	0
TCGA-46-3768-01	LUSC		1					1				-1	1	1	-1	-1	0		0	1		1	1
TCGA-46-3769-01	LUSC	0								-1				-1		-1				-1		-1
TCGA-46-6025-01	LUSC												1	-1					-1				0
TCGA-46-6026-01	LUSC	-1	0		-1		1	-1	0	-1	0			0	-1				0		1	-1	0
TCGA-51-4079-01	LUSC		0				0	0	0				0	-1	0			0		0		0	0
TCGA-51-4080-01	LUSC				0		0				-1	0	0	0	0	0			0	0	0	0	0
TCGA-51-4081-01	LUSC				-1		-1	0			-1	0		0	1	0		0	0	0		-1
TCGA-52-7622-01	LUSC		0				0	0			-1	0	0	-1	0	0			0	0		-1	0
TCGA-52-7809-01	LUSC				-1						-1						-1	0	0		0	-1	0
TCGA-52-7810-01	LUSC						0			-1	-1			0	-1	-1	-1	-1	-1			-1	1
TCGA-52-7811-01	LUSC				-1			0		0		0		0	1	0		0	0		0	1	0
TCGA-52-7812-01	LUSC		0							0	0	0	0	-1	0	0				0	0	0	-1
TCGA-56-1622-01	LUSC	0					0			-1				-1	0	-1	0		-1		1		1
TCGA-56-5897-01	LUSC	0	0		0		0	0		-1		0	0	0	-1	0	0		-1	0	0	-1
TCGA-56-5898-01	LUSC		1		0		1			-1					1	1	0		1		1		1
TCGA-56-6545-01	LUSC									-1	0					0		0			1	1	1
TCGA-56-6546-01	LUSC	0	0	0	0		0			-1	0	0	0	-1	0	0	0	0	0			-1	-1
TCGA-56-7221-01	LUSC		0		-1		0	1				0	0	0	0	0		0	-1		0	1	1
TCGA-56-7222-01	LUSC	0	1		-1			0		-1		-1			0	1				-1	1	-1	0
TCGA-56-7223-01	LUSC		0		-1			1		-1	-1				0		0				1	-1	0
TCGA-56-7579-01	LUSC	0						1			0			-1	0	0			0	-1	0	-1	0
TCGA-56-7580-01	LUSC		1		1		1	0		-1	-1	-1	1	1	1	0	0	0	1	1		-1	1
TCGA-56-7582-01	LUSC				-1			1			-1		1	0	0	1	0		0	1	1	-1	1
TCGA-56-7730-01	LUSC				-1			0			-1			-1	0	0		1		0			1
TCGA-56-7731-01	LUSC	0	0		0		0	0		-1	-1	0	0	0	0	0	0	0	0	0	0	0	1
TCGA-56-7822-01	LUSC	-1	0		0			0		-1	0	-1			0	-1	-1	-1		-1		-1	1
TCGA-56-7823-01	LUSC		0		-1		0	0	0			0	0	-1	0	0				0	0
TCGA-56-8082-01	LUSC		0										0	-1	0	0	-1	0	0	-1		-1
TCGA-56-8083-01	LUSC	0	0				0				0		0	0	0	0	0		0		0	0	1
TCGA-56-8201-01	LUSC	0			-1		0			-1	1	0	1	1			-1	1	0	0	1	1
TCGA-56-8304-01	LUSC				-1		0		0			0		-1		-1	0			0	0	0
TCGA-56-8305-01	LUSC						0			-1	-1	0	0		-1	-1			-1	-1	0	-1	0
TCGA-56-8307-01	LUSC	1	0		1		1	1	1		0	1	1	-1	-1				0	1	0	1	0
TCGA-56-8308-01	LUSC				-1										0	1	0		0			1	1
TCGA-56-8309-01	LUSC	0	0		0			0	0			0	0	-1	-1	-1				0	0	0	0
TCGA-56-8503-01	LUSC	0	0				0			-1			0	0	-1		-1	-1	-1		0	-1	0
TCGA-56-8504-01	LUSC				-1		-1			-1	-1			-1	1	-1		0	-1	-1	0		1
TCGA-56-8622-01	LUSC	0	0		0		0	0		-1	0	0	0		0	0	0		0			0	1
TCGA-56-8623-01	LUSC	0	0	0	0	0	0	0	0	0	0	0	0	0	0	0	0	0	0	0	0	0	0
TCGA-56-8624-01	LUSC	0	0		0	1	-1		0	-1	0	-1				0	0	-1	-1		1	0	0
TCGA-56-8625-01	LUSC							0	0						0		0		0	0		0	0
TCGA-56-8626-01	LUSC	0	0		0					-1		0	0	1	0	0			-1	0		0	1
TCGA-56-8628-01	LUSC				0		0			-1			0	-1	0	0	0	-1	0			0	0
TCGA-56-8629-01	LUSC	0								-1		-1			1							-1	1
TCGA-56-A49D-01	LUSC							0		-1		0		-1	0	-1	-1					-1	0
TCGA-56-A4BW-01	LUSC	0					0							0	0		1	0		0	1	-1	1
TCGA-56-A4BX-01	LUSC				-1		0							1	0	0					0		1
TCGA-56-A4BY-01	LUSC	0			0			0		0	-1		0	-1	-1	0					0	0	0
TCGA-56-A4ZJ-01	LUSC	0	0				0		0	-1	0		0	0	0	0	0		0				1
TCGA-56-A5DS-01	LUSC	0	1		0		0	0		-1	0	0	0	0	0	0	0			0	0	0	1
TCGA-56-A62T-01	LUSC	-1					0	1	1	0	-1		0	-1	1	-1			-1	-1	1	-1	-1
TCGA-58-8386-01	LUSC	0	0		0									-1	0	-1					1	-1	1
TCGA-58-8387-01	LUSC							0			0					0			0	0	0	-1
TCGA-58-8388-01	LUSC		0		0		0	0	0	0		0	0		-1	0			0		0	-1	0
TCGA-58-8390-01	LUSC		0				0				0		0	-1	-1	0			0			-1	1
TCGA-58-8391-01	LUSC		1						0					-1		1				0			0
TCGA-58-8393-01	LUSC				-1			0		-1	-1	0	0	-1	0	1	-1		0		1	0	0
TCGA-58-A46J-01	LUSC	0	0		-1		0	0		-1		0	0	-1		0			0	0	0	0	0
TCGA-58-A46K-01	LUSC				-1				-1		-1	0	0	-1	-1				-1	0	0	-1	-1
TCGA-58-A46L-01	LUSC				-1		0					0	0	0	0	0			0		0	0	0
TCGA-58-A46M-01	LUSC		1									0				0			-1			0	1
TCGA-58-A46N-01	LUSC		1		0		0	1			0	0		0	1	0	0		1	1	0	0	1
TCGA-60-2695-01	LUSC		-1					-1		0	-1	-1	0		-1	0	-1	-1		0		-1
TCGA-60-2697-01	LUSC	0	0	0	0		0	0	0	0	0	0	0	0	0	0	0	0	0	0	0	0	0
TCGA-60-2698-01	LUSC				-1									1	1	-1	0					-1	-1
TCGA-60-2703-01	LUSC	0					1			-1		0		-1	0	-1	0		0	0	1	-1	1
TCGA-60-2704-01	LUSC	0	0		-1		-1	1		1	-1	0		-1	-1	-1	-1	0	0	1		-1	1
TCGA-60-2706-01	LUSC		0					1		-1		0		1	1	1						1	0
TCGA-60-2707-01	LUSC	0	0		0			0	0		0	0	0	0	0	0	0		0	0	0	-1	0
TCGA-60-2708-01	LUSC		0		-1	-1	-1	1		-1	-1	-1	1		1	-1			-1	1	1		1
TCGA-60-2709-01	LUSC	1	1		-1			1			-1	0	1		-1	1	0	1	1	1	1	-1	1
TCGA-60-2710-01	LUSC	0	0				0	0				0	0	-1	-1				0	0	0	0	0
TCGA-60-2711-01	LUSC							1			0	0		-1	0	1			1		1	-1	1
TCGA-60-2713-01	LUSC				-1		0					0	0	-1	-1	0			0	0	0		0
TCGA-60-2714-01	LUSC	-1					1	1					0		-1	-1		-1		-1		1	1
TCGA-60-2716-01	LUSC	0	0	0	0	0	0	0	0	0	0	0	0	0	0	0	0	0	0	0	0	0	0
TCGA-60-2719-01	LUSC	0	0		-1		0	0			-1	0	0	-1		0	-1		0		0	0	0
TCGA-60-2720-01	LUSC	0	0		-1		0	0	0	-1			0	-1	0	-1	-1	-1	0		0	0	0
TCGA-60-2721-01	LUSC		0					0		-1	0		0	0	0		0		0	0	0	0	0
TCGA-60-2722-01	LUSC					-1		0	0		-1		-1	-1	0	0	0		0		0	-1	1
TCGA-60-2723-01	LUSC	0			-1					-1				-1	-1	-1	-1		0			-1	1
TCGA-60-2724-01	LUSC	0	0		-1		0			-1	0			-1	0	0			0	0	0	0	0
TCGA-60-2725-01	LUSC	0	0		0			0						-1	-1	0			0	0		-1	1
TCGA-60-2726-01	LUSC									-1	0	-1		-1						-1	1	-1	0
TCGA-63-5128-01	LUSC				-1					-1	-1	0		-1		1	-1						1
TCGA-63-5131-01	LUSC										0				0							-1	1
TCGA-63-6202-01	LUSC	0		0							1	0	0	-1		0	-1		0			0	-1
TCGA-63-7020-01	LUSC	0	0		-1		-1			-1	-1	1		-1	1	0	1	-1	1		1	-1	1
TCGA-63-7021-01	LUSC	0	0			0		0		0		0	0	-1	0	0	0		0	0	0	-1	0
TCGA-63-7022-01	LUSC	0	0		0		0		0		0	0	0	0	0	0	0		0	0	0	0	0
TCGA-63-7023-01	LUSC				-1	-1	0				0			0	-1	0			0		0	-1	0
TCGA-63-A5M9-01	LUSC										-1			-1		0						0	1
TCGA-63-A5MB-01	LUSC										-1			-1	-1					1	1	-1
TCGA-63-A5MG-01	LUSC	0	0				0	0	1	-1		0		-1	0	0		-1	0	0	0	0	0
TCGA-63-A5MH-01	LUSC	0					0		0	-1	-1	-1			-1		-1		-1	0	-1	0	0
TCGA-63-A5MI-01	LUSC				0									-1		1							1
TCGA-63-A5MJ-01	LUSC										0	0	1	-1	0					1	1
TCGA-63-A5ML-01	LUSC				-1			0	-1	0			0	-1	-1				0		1	-1	-1
TCGA-63-A5MM-01	LUSC	0	0		0	0	0			0		0	0	0	0	0	0	0	0	0	1	0	0
TCGA-63-A5MN-01	LUSC	0	0	0	0		0	0		0	0	0	0	-1	0	0	0		0		0	-1	-1
TCGA-63-A5MP-01	LUSC	-1						0				0				1				-1	0	-1
TCGA-63-A5MR-01	LUSC				-1	0	-1		1		0		1	-1	0		0	0	-1		0	1	0
TCGA-63-A5MS-01	LUSC		1				1			-1				0							1	-1	1
TCGA-63-A5MT-01	LUSC										0		0			0	0		-1	-1	0	0	0
TCGA-63-A5MU-01	LUSC		1				0	1			0		0	-1	1		0			0	0	0	0
TCGA-63-A5MV-01	LUSC	0			0		0	0					0	0	0	1	0		0		1		1
TCGA-63-A5MW-01	LUSC									-1	0			-1		-1	0			0	1	0
TCGA-63-A5MY-01	LUSC	0									0		0	-1	0							0
TCGA-66-2727-01	LUSC							0						-1		0	-1			0			-1
TCGA-66-2734-01	LUSC	0	0		-1		0	0		-1	0	0	0	-1	0	0	-1			0	0	-1	1
TCGA-66-2737-01	LUSC		0				0	0			0		0	0		-1	0	0	0	0	0	0	0
TCGA-66-2742-01	LUSC		0		-1		0	1	1	-1			0	0	0	-1	0				1	-1	1
TCGA-66-2744-01	LUSC										0				1	0	0	0		0		0	0
TCGA-66-2753-01	LUSC	0	0				0	0		-1	-1		0	-1	-1	0			-1	-1		-1	-1
TCGA-66-2754-01	LUSC		0		-1						-1	0		-1	-1				0		0	-1	0
TCGA-66-2755-01	LUSC				0			1				0	0	-1	-1	0		0		0	-1	-1	1
TCGA-66-2756-01	LUSC				-1		-1							-1	0	-1			-1		0	1	-1
TCGA-66-2757-01	LUSC	0	0				0			0	-1		0	0	-1	0			0	0		0	-1
TCGA-66-2758-01	LUSC						-1					-1		-1	-1							-1
TCGA-66-2759-01	LUSC										-1		0	-1		0						-1	-1
TCGA-66-2763-01	LUSC							0							0	0				0	0		0
TCGA-66-2765-01	LUSC	0	0		-1		1	0	0		0		0		0			0		0	0	-1	0
TCGA-66-2766-01	LUSC																					-1
TCGA-66-2767-01	LUSC					0	0	1	1		0		1	-1	0						0		0
TCGA-66-2768-01	LUSC	0	0		0		0				0		0		0	0						0	0
TCGA-66-2769-01	LUSC	0			0		1			-1	0				-1				1		1		1
TCGA-66-2770-01	LUSC		0		-1	0	0		0		-1	0	0	0	-1	0		0	0	0	0	0	0
TCGA-66-2771-01	LUSC	0						0	0	-1	0		0	-1		0	0		0		0	-1	-1
TCGA-66-2773-01	LUSC				-1				1						-1	1	0		-1			0	1
TCGA-66-2777-01	LUSC				-1							1		-1		1	0		1		1	-1	1
TCGA-66-2778-01	LUSC	0	0				0	0	0	-1		0	0	-1	0	0		0	0	0	0	0	0
TCGA-66-2780-01	LUSC	0	0		-1			0		-1			0	-1	0	0	0	-1	-1			-1	0
TCGA-66-2781-01	LUSC						1							-1							1	-1	1
TCGA-66-2782-01	LUSC	0	0		0		0	0		-1	0		0	0	0	-1		-1	0		0	-1	0
TCGA-66-2783-01	LUSC		0									0	0	-1	0	0	0			0		1
TCGA-66-2785-01	LUSC				-1			1		-1				-1	0	0			-1
TCGA-66-2786-01	LUSC	0						0	0			0	0	-1	-1	0		-1			0	-1	0
TCGA-66-2787-01	LUSC									0	-1	0		-1	-1		-1		1	1	1		0
TCGA-66-2788-01	LUSC	0	0		0			0	1	-1	0	0	0	-1	1	0	0		0		0	-1	0
TCGA-66-2789-01	LUSC	0			0			0		-1			0	0							0	0	-1
TCGA-66-2790-01	LUSC				0		0	0		-1			0	-1	0			0				0
TCGA-66-2791-01	LUSC				-1			0		0	-1		0						-1	0		-1
TCGA-66-2792-01	LUSC				-1								0	-1	1		-1	1	-1			-1	1
TCGA-66-2793-01	LUSC					-1	1			-1			1		1	0					1	0	-1
TCGA-66-2794-01	LUSC		0								0		1	0	0		0				0	0
TCGA-66-2795-01	LUSC				-1			0			0	0	0	0		0	0				0	0
TCGA-66-2800-01	LUSC						0	1			-1			-1	0	0	-1		1		1		1
TCGA-68-7755-01	LUSC	-1			-1		-1			0		0	0	-1	0	0	0				0	-1	0
TCGA-68-7756-01	LUSC	0	0		-1		0	0	0	0	0	0	0	-1	0	0	0	0	0		0	-1	0
TCGA-68-7757-01	LUSC		0							-1				-1	0	0	0		-1	0	0	0	0
TCGA-68-8250-01	LUSC	0					0					-1		-1	-1		0					-1	-1
TCGA-68-8251-01	LUSC		0		0			0		-1	-1	-1	1	-1	-1	0	-1		0	1		0	0
TCGA-68-A59I-01	LUSC	0								-1				-1	0		0		0			0	-1
TCGA-68-A59J-01	LUSC										-1	-1		0	-1							0	1
TCGA-6A-AB49-01	LUSC	0						1						-1		0	-1	0			1	0	0
TCGA-70-6722-01	LUSC						0			-1	-1			-1	-1	-1		-1			0
TCGA-70-6723-01	LUSC				-1						-1				0	0						-1
TCGA-77-6842-01	LUSC	0	1				0	0			-1	0	1	-1	0	-1	-1					-1	1
TCGA-77-6843-01	LUSC		0			0	0			-1		0	0	0	-1	0	0	0	0			0
TCGA-77-6844-01	LUSC		0		0		0			-1	0		0		0	0			0	0		0	0
TCGA-77-6845-01	LUSC							1		-1		1
TCGA-77-7139-01	LUSC				-1		0	0		0	0			-1	-1	0			0		1	0	1
TCGA-77-7140-01	LUSC						-1							-1			-1					-1
TCGA-77-7141-01	LUSC												1	-1	-1						1		1
TCGA-77-7142-01	LUSC				-1				-1	-1				-1	0	-1			-1			-1
TCGA-77-7335-01	LUSC	0					0	0			0	0		-1	0	0	0				0	-1	0
TCGA-77-7337-01	LUSC														0		0			0		0	-1
TCGA-77-7338-01	LUSC		0					0			0	0		0	-1	0	0		0	0	0	0	1
TCGA-77-7463-01	LUSC		0		-1		-1	1						-1		0		-1	1	-1		-1	1
TCGA-77-7465-01	LUSC				-1		0				-1	-1		-1	-1	0				0			0
TCGA-77-8007-01	LUSC	0		0							0			-1	1	-1	0			0	1	1	1
TCGA-77-8008-01	LUSC		0		0		0			-1	0	0		0	0	1	0	0	0		0	-1	0
TCGA-77-8009-01	LUSC				-1		-1	1			-1				-1	-1	0					-1	0
TCGA-77-8128-01	LUSC		0		-1			1			0		1		0	0	0				0
TCGA-77-8130-01	LUSC	0			0		1	1						-1	1	-1				1	1	1	1
TCGA-77-8131-01	LUSC	0	0	0	0	0				0	0	-1		-1	0		0	-1	-1	0	0	0	0
TCGA-77-8133-01	LUSC		0		-1		0	1			-1	-1	1			1	0		0	0		0	1
TCGA-77-8136-01	LUSC	0					0				-1		0		0	0	-1		-1		0		0
TCGA-77-8138-01	LUSC		1		-1			0		-1	-1	-1		-1	0	1	0	-1			0	0	0
TCGA-77-8139-01	LUSC		0		-1						-1	0	-1	-1	1	-1			-1	0	-1		-1
TCGA-77-8140-01	LUSC	0	0					0		-1	-1		0		-1	0
TCGA-77-8143-01	LUSC	0			0		0			-1			0	-1	1			0	1		1	1	1
TCGA-77-8144-01	LUSC		0		-1	0								-1	0	0	0		-1	-1		0	0
TCGA-77-8145-01	LUSC						0	0				0	0	0	0	0	0		0			0	1
TCGA-77-8148-01	LUSC				-1		0						1	-1	1	0		0	0		1	0	0
TCGA-77-8150-01	LUSC				-1		-1		0	0		-1		-1	1			-1	0	0	0	-1
TCGA-77-8153-01	LUSC				-1		0		0		-1		0	-1	0			0	0			-1
TCGA-77-8154-01	LUSC						0	0		-1	0			-1		0					0	-1	0
TCGA-77-8156-01	LUSC				-1						-1				-1	-1	-1	0				-1	0
TCGA-77-A5FZ-01	LUSC	0	0	0	0	0	0	0	0	0	0	0	0	0	0	0	0	0	0	0	0	0	0
TCGA-77-A5G1-01	LUSC	0	0		0		0	0		-1	0	0			0	0	0	-1	-1		0	0	0
TCGA-77-A5G3-01	LUSC						-1				-1		0	-1	0							-1	0
TCGA-77-A5G6-01	LUSC									-1						-1						-1
TCGA-77-A5G7-01	LUSC	0	0				0			-1				-1	-1	0			0			-1	0
TCGA-77-A5G8-01	LUSC		0		-1		-1							-1	1	0			-1			0
TCGA-77-A5GB-01	LUSC	0			-1					0		0		0	0	0	0	-1	0	0	0	0	0
TCGA-77-A5GF-01	LUSC				-1						-1	-1	0	-1		0		1	1		1	-1	1
TCGA-77-A5GH-01	LUSC	0					0				0	0			-1	-1		-1			0	-1	0
TCGA-79-5596-01	LUSC						0	0				0	0	0	0			0	0			-1
TCGA-85-6175-01	LUSC	-1	0		-1		-1			-1	-1	-1	-1	-1	0	-1	0		-1		0	0	0
TCGA-85-6560-01	LUSC	0			-1			-1		-1				-1		-1	0		-1	-1			-1
TCGA-85-6561-01	LUSC		0			-1	0			0		0	0	-1		0		0			0	-1	0
TCGA-85-6798-01	LUSC						1	1		0	-1			0		0	-1					-1	0
TCGA-85-7696-01	LUSC		0				0	0				0		0	0		0		0		0	-1	0
TCGA-85-7697-01	LUSC	0	0					0			0			-1	0	0	-1	0	-1	0	0	0
TCGA-85-7698-01	LUSC							0				0	0	-1	0	0		0		0	0	-1	0
TCGA-85-7699-01	LUSC	0			-1		0	0	0		-1				0	0	-1	0	0		0	0	0
TCGA-85-7710-01	LUSC				0			0			0	0		0	0	0	0		0		0	0	0
TCGA-85-7843-01	LUSC	-1								-1						-1					1	-1	0
TCGA-85-7844-01	LUSC		0		-1						-1	-1	0	-1	-1	1				0		0	0
TCGA-85-7950-01	LUSC		0		0			1			-1		1		-1	1	-1					1	0
TCGA-85-8048-01	LUSC	0	0		-1		0			-1	0		0	0	-1	0	0	0			0	-1	-1
TCGA-85-8049-01	LUSC		0		-1	0		1	-1	-1	-1	-1		-1	-1	1		0		0	1	-1	-1
TCGA-85-8052-01	LUSC				-1			1		0	-1	0	1	0	-1	1			0	0	1	0	1
TCGA-85-8070-01	LUSC									0		0	0	-1	-1	0					0	-1	0
TCGA-85-8071-01	LUSC		0				0	0	0				0	-1	0	0		0				-1	0
TCGA-85-8072-01	LUSC													-1	-1					-1	0		-1
TCGA-85-8276-01	LUSC				-1		1				0			0		1	1					-1	1
TCGA-85-8277-01	LUSC				-1		-1			0	-1				-1	0		1			1	0	0
TCGA-85-8287-01	LUSC				0					-1		0		-1	-1				-1	-1	1	-1
TCGA-85-8288-01	LUSC	0					0	0	0	-1	0		0	-1	-1		0		0	0		0	0
TCGA-85-8350-01	LUSC	0			-1			-1		-1	0	-1		-1	-1	0	0				0	-1	0
TCGA-85-8351-01	LUSC		0					0	0	-1	-1		0	-1	0	1	0		0			-1	0
TCGA-85-8352-01	LUSC				-1					-1		-1	0	-1	-1							-1	0
TCGA-85-8353-01	LUSC		0		-1		0			0	-1				0	0	-1	0			0	0	0
TCGA-85-8354-01	LUSC							1							0	1	0
TCGA-85-8355-01	LUSC	0			0	-1	0	0		0	0		0	0	0	0	-1	-1			0	-1	0
TCGA-85-8479-01	LUSC		0					0	0		-1	-1			0	0		-1			0		0
TCGA-85-8481-01	LUSC	0	0		0		0			-1	0				0		0					-1
TCGA-85-8580-01	LUSC	0	0				0				-1	0	0		-1	0				0	0	-1	0
TCGA-85-8582-01	LUSC				-1					-1		-1	-1	-1		0	-1		-1				-1
TCGA-85-8584-01	LUSC		0	0	0	0		0			0	0		0	0		0		0		0	0	-1
TCGA-85-8664-01	LUSC				-1					-1	0		1	-1		1	-1				1	-1	-1
TCGA-85-8666-01	LUSC				-1			1		-1		0	1		0	-1					1	-1	-1
TCGA-85-A4CL-01	LUSC		0			0		0			0	0	0	0	-1				0		0	-1
TCGA-85-A4CN-01	LUSC				-1			0			-1		0	-1	-1				0	0		-1	0
TCGA-85-A4JB-01	LUSC						0			-1				-1	1	-1		-1	0		1	0	1
TCGA-85-A4JC-01	LUSC				0		-1	0		-1	-1	-1	0		-1	0	-1		-1	-1	0	-1	0
TCGA-85-A4PA-01	LUSC	0	0	0	0	0	0	0	0	0	0	0	0	0	0	0	0	0	0	0	0	0	0
TCGA-85-A4QQ-01	LUSC	0	0										0	0	0	-1	0			0		0
TCGA-85-A4QR-01	LUSC				-1					-1				-1	0	0							1
TCGA-85-A50M-01	LUSC	1		0	0			1	-1	-1					1				1		1		1
TCGA-85-A50Z-01	LUSC	0	0					0		-1				-1	0					0		-1	0
TCGA-85-A510-01	LUSC		0		-1			-1	1	-1			0	-1		0					1	-1	-1
TCGA-85-A511-01	LUSC														-1	-1	0	0		0	1	-1
TCGA-85-A512-01	LUSC		0						0					-1		0					0	0	0
TCGA-85-A513-01	LUSC	0	0		0		0			0	0	0		0		0	0		0	0	0	0	0
TCGA-85-A53L-01	LUSC						0			-1		0		-1		-1					0	-1
TCGA-85-A5B5-01	LUSC						-1					-1		-1	1					1	1	-1
TCGA-90-7766-01	LUSC	0	0					0		-1	0		0	-1	-1		0			0	0	-1	0
TCGA-90-7767-01	LUSC									-1				-1	-1	-1	-1			0		0	0
TCGA-90-7769-01	LUSC	-1									-1	-1	0	-1		0	-1	0			0	-1	0
TCGA-90-7964-01	LUSC	1	0		-1		0	0	0	-1	0			-1	0	0	0				0	0	0
TCGA-90-A4ED-01	LUSC		1	0	0	0	0	1	0	1	1	1			-1	0				0	1	0	0
TCGA-90-A4EE-01	LUSC				-1		0	0						-1	-1	-1	-1		0	0	0	-1	-1
TCGA-90-A59Q-01	LUSC		1		-1			1			0		1	1	-1	1	1		1		0	0	-1
TCGA-92-7340-01	LUSC	0					0		0	0		0	0	-1	1	0	0	0	0	0	0	1	0
TCGA-92-7341-01	LUSC						-1	1						-1	0	1			-1		1	-1	1
TCGA-92-8063-01	LUSC	0	0		-1							0	0	-1	0	0	0				0	0	-1
TCGA-92-8064-01	LUSC										-1			-1		-1		0		1	1	-1	0
TCGA-92-8065-01	LUSC				-1	0					0	0	0		0	-1			0			0	-1
TCGA-94-7033-01	LUSC	0	0							-1				0	0	0	0				0		1
TCGA-94-7557-01	LUSC	1	1				0	1		-1		1	1		-1				-1		1	-1	1
TCGA-94-7943-01	LUSC				-1			0		-1		1	1	1	-1	1	0		-1			-1	1
TCGA-94-8035-01	LUSC		0				0	0	0	-1	-1		0			0		0	0	0	0	0	0
TCGA-94-8490-01	LUSC							0	0		0		0		0	0	0		0				0
TCGA-94-8491-01	LUSC				0						0		0	-1		0	0		0			-1
TCGA-94-A4VJ-01	LUSC									-1	1			0		0						-1	1
TCGA-94-A5I4-01	LUSC					-1						0		-1	0	1					1	-1	1
TCGA-94-A5I6-01	LUSC				-1		0	0			-1			-1	-1	0	0	-1	-1		1	-1	1
TCGA-96-7544-01	LUSC							0			0			-1	0	0			0			0	0
TCGA-96-7545-01	LUSC							0					0	-1	-1	0	0		0		0	0	0
TCGA-96-8169-01	LUSC		0		0		0	0		-1	0		0	-1	0	0	-1					0	0
TCGA-96-8170-01	LUSC	0	0		0		0	0			-1	0	0	0	0	0	0		-1		0	0	1
TCGA-96-A4JL-01	LUSC		0		0	0	0	1			0		0	0	-1	0			0	0	0	0	0
TCGA-98-7454-01	LUSC	0	0		-1	-1	0	-1	0	0	0	0	-1	-1	-1	0	-1	0	-1	0	0	0	-1
TCGA-98-8020-01	LUSC	0			-1		0	0		-1					1		1				1	0	1
TCGA-98-8021-01	LUSC	0	0				0	0		-1	-1	0		-1	-1	0			0			-1	0
TCGA-98-8022-01	LUSC	1										0		-1	0	0	1	-1	0		1	-1	1
TCGA-98-8023-01	LUSC				0			0		-1		-1		-1	-1		-1	0	-1		0	-1	-1
TCGA-98-A538-01	LUSC	0	0							-1		-1		-1	0	0						-1	1
TCGA-98-A539-01	LUSC		0		-1		0	0		-1			0	-1	1	0	-1		-1		1	-1	1
TCGA-98-A53A-01	LUSC		0				0				-1		0		-1	0	-1				0	0	0
TCGA-98-A53B-01	LUSC				-1		1			-1	1		1	-1	0	1					1	0	-1
TCGA-98-A53C-01	LUSC	0	0	0	0	0	0	0	0	0	0	0	0	0	0	0	0	0	0	0	0	0	0
TCGA-98-A53D-01	LUSC	0	0	0	0	0	0	0	0	0	0	0	0	0	0	0	0	0	0	0	0	0	0
TCGA-98-A53H-01	LUSC	0	0	0	0	0	0	0	0	0	0	0	0	0	0	0	0	0	0	0	0	0	0
TCGA-98-A53I-01	LUSC				-1			0	0		0		0	-1		0			0	0		0	0
TCGA-98-A53J-01	LUSC		1		-1	1		1	0		-1	0		0	-1	1			0		1	-1	1
TCGA-J1-A4AH-01	LUSC										-1		1		0	0			1		1	0	1
TCGA-L3-A4E7-01	LUSC	0	0					0	0			0	0		0	0		-1	0		0		0
TCGA-L3-A524-01	LUSC				-1						-1	0		-1	1	1						0
TCGA-LA-A446-01	LUSC											0			-1	1		0	0		1	-1	1
TCGA-LA-A7SW-01	LUSC		0													0		0			1	0	0
TCGA-MF-A522-01	LUSC		1				1	1				-1		1		-1	0	1			1	-1	-1
TCGA-NC-A5HD-01	LUSC				-1			0		-1	-1			-1					-1	-1		-1	-1
TCGA-NC-A5HE-01	LUSC				-1	0	0	0			0		0	-1	-1		0				0		-1
TCGA-NC-A5HF-01	LUSC	0	0		-1		0				0			-1	0	-1	0	-1		0	1	0	0
TCGA-NC-A5HG-01	LUSC		0					0		-1	0	-1	0	-1	0				-1			0
TCGA-NC-A5HH-01	LUSC				0			0		0					0		0				1	-1
TCGA-NC-A5HI-01	LUSC		0		-1		0			-1			0	-1	0	-1	0			0	0		0
TCGA-NC-A5HJ-01	LUSC											-1			-1		-1		0			-1	-1
TCGA-NC-A5HK-01	LUSC				-1						0			-1		-1				-1			0
TCGA-NC-A5HL-01	LUSC				-1									-1	-1	-1
TCGA-NC-A5HM-01	LUSC						0				-1		0	-1	0	-1	0		0			-1	-1
TCGA-NC-A5HN-01	LUSC									0			0										1
TCGA-NC-A5HO-01	LUSC					0			0		-1			-1						0	0	0	-1
TCGA-NC-A5HP-01	LUSC				-1									-1	0				-1		0	-1	1
TCGA-NC-A5HQ-01	LUSC				-1		-1				0			-1	1	-1					0	-1	-1
TCGA-NC-A5HR-01	LUSC				-1	-1				0			0	0	0	0			-1			0	0
TCGA-NC-A5HT-01	LUSC	0	0							-1			0	-1	0	0		0	0	0		0	0
TCGA-NK-A5CR-01	LUSC											-1		-1					0			-1	0
TCGA-NK-A5CT-01	LUSC	0	0		-1		0	0	0	-1		-1	0	-1	-1	0	0	-1				-1	-1
TCGA-NK-A5CX-01	LUSC	0	-1		-1		0	0	0	-1	0		-1	-1	1	-1	0	-1	0		1	-1	-1
TCGA-NK-A7XE-01	LUSC				0					0				0	0	1	0		0			0	0
TCGA-O2-A52N-01	LUSC													0			-1				1		1
TCGA-O2-A52Q-01	LUSC		0			0		1		-1				-1	1		0	0	-1	-1		-1	0
TCGA-O2-A52S-01	LUSC				-1	-1		0					0	-1								-1	0
TCGA-O2-A52V-01	LUSC	0	0		-1	0		0		-1		-1		-1	0	0	0			0	0	0	0
TCGA-O2-A52W-01	LUSC	0	1		-1		1			-1		-1		0	1	-1			0		1	-1
TCGA-O2-A5IB-01	LUSC		0						0						0				1	0
TCGA-XC-AA0X-01	LUSC				-1							-1		-1	-1	0					0	0	0
TCGA-P7-A5NY-01	PCPG		0	0	0	0	0	0	0	0	0	0	0	0	0	0	0	0	0	0	0	0	0
TCGA-P7-A5NY-05	PCPG		0	-1	1	0	1	0	-1	0	0	-1	-1	-1	-1	0	0	-1	0	0	0	-1	0
TCGA-P8-A5KC-01	PCPG	0	0	0	0	0	0	0	0	0	0	0	0	0	0	0	0	0	0	0	0	0	0
TCGA-P8-A5KD-01	PCPG		0		0	0		0	0	0	0	1	0	0	0	0	0	0		0	0	0	-1
TCGA-P8-A6RX-01	PCPG		0	-1	0		0	1	0	0	0	-1	0	0	0	0	0	0	0	0	0	0	0
TCGA-P8-A6RY-01	PCPG	0	0	0	0	0	0	0	0	0	0	-1	0	0	0	0	0	0	0	0	0	0	-1
TCGA-PR-A5PF-01	PCPG		0		0	0	0	0		0	0			0	0	0		0	0		0	-1	-1
TCGA-PR-A5PG-01	PCPG		0	0	0	0				0	0		0	0	0	0	0		0	0	0	0	0
TCGA-PR-A5PH-01	PCPG		0	0	0	0	0	0	0	0	0	0	0	0	-1	0	0	0	0	0	0	0
TCGA-QR-A6GO-01	PCPG		0		0	0		0	0	0	0	0	0	0	-1	0	0	0	0	0	0	-1	0
TCGA-QR-A6GR-01	PCPG		0	0	0	0	0	0	0	0	0		0	0	0	0	0		0	0	0	0	-1
TCGA-QR-A6GS-01	PCPG		0	0		0	0	0	0	0	0		0	0	0	0	0		0	0	0	0	0
TCGA-QR-A6GT-01	PCPG			-1	0	0	0	0		0	0	0	0	0	0	0	0	0	0	0	0	0	0
TCGA-QR-A6GU-01	PCPG	0	0	-1	0	0	0	0	0	0	0	-1	0	0	0	0	0		0	0	0	0	0
TCGA-QR-A6GX-01	PCPG		0	0	0	1	1	1	-1	0		0	1	0	0	1	1	0	0	1		1	0
TCGA-QR-A6GY-01	PCPG	0			0	0	0		0		0	0	0	0	0	0	0			0	0	0	0
TCGA-QR-A6GZ-01	PCPG	0	1	-1		0	1	1	1	0	0	-1	1	1		0	0	0	1	1	1	1	0
TCGA-QR-A6H0-01	PCPG		0		0	0	0	0	0	0	0	0	0	0	0	0	0	0	0	0	0	0	0
TCGA-QR-A6H1-01	PCPG		0		0	0	0	0	0	0	1	0	0	0	0	0	0		0	0	0	0	0
TCGA-QR-A6H2-01	PCPG		0		0	0	0	0	0	0	0	0	0	0	0	0	0		0	0	0	-1	0
TCGA-QR-A6H3-01	PCPG	-1	0	0	0	0	0	0	0	0	0	0	0	0	0	0	0	0	0	0	0	0	0
TCGA-QR-A6H5-01	PCPG	0	0	-1	0	0	0	0	0	0	0	-1	0	0	0	0	0	0	0	0	0	0	0
TCGA-QR-A6H6-01	PCPG				0	0	0	0	0	0	0		0	0	0	0	0	0	0		0	0	0
TCGA-QR-A700-01	PCPG	-1	1	-1	-1	0	1	1	-1	0		0	1	-1	0	1	0		1	0	1	-1	1
TCGA-QR-A702-01	PCPG		0		0	0	0	0	0	0	0		0	0	0	0	0		0	0	0	0	-1
TCGA-QR-A706-01	PCPG	0	0			0	0	0	0	0	0		0	0	0	0	0	0	0	0	0	0	0
TCGA-QR-A70C-01	PCPG	0	0	0	0	0	0	0	0	0	0	0	0	0	0	0	0	0	0	0	0	0	0
TCGA-QR-A70D-01	PCPG		0	-1	0	0	0	0	0	0	0	0	0	0	0	0	0	0	0	0	0	0	0
TCGA-QR-A70E-01	PCPG	-1	0	0	0	0	0	0	0	0	0	0	0	0	0	0	0	0	0	0	0	0	-1
TCGA-QR-A70G-01	PCPG	0	0	0	0	0	0	0	0	0	0	0	0	0	0	0	0	0	0	0	0	0	-1
TCGA-QR-A70H-01	PCPG		0	0	0		0		0		0	0	0	0	-1	0	0	0	0	0	0	0	-1
TCGA-QR-A70I-01	PCPG	0	0	0	0	0	0	0	0	0		0	0	0	0	0	0			0	0	0	0
TCGA-QR-A70J-01	PCPG		0	-1	0	0	0	0	0	0	0		0	0	0	0	0	-1	0	0	0	0	0
TCGA-QR-A70K-01	PCPG			0	0		0	0	-1	0	0		0	0	0	0			0	0	0	-1	-1
TCGA-QR-A70N-01	PCPG	0	0	-1	-1	0	1	1	1	1	1	-1	1	1	1	1	0	0	1	1	0	-1	1
TCGA-QR-A70P-01	PCPG		0		0	0	0	0	0	0	0	0	0	0	0	0		0	0	0	0	0	-1
TCGA-QR-A70W-01	PCPG		0		0	0		0	0	0	0	0	0	0	0	0	0			0	0	0	-1
TCGA-QR-A70X-01	PCPG	-1	0	0	0	0	0	0	0	0	0	0	0	0	0	0	0		0	0	0	0	0
TCGA-QR-A7IN-01	PCPG	-1	0	-1	0		0	0	0	0	0	-1	0	0	0	-1	0	0	0	0		0	0
TCGA-QR-A7IP-01	PCPG			-1	0	0	0	0	0	-1	0		0	0	-1	0	0	0	-1	0	0	0	0
TCGA-QT-A5XJ-01	PCPG		0	-1	0		0	0	0		0		0	0		0		0	0	0	0	0	0
TCGA-QT-A5XK-01	PCPG		0	-1	0	0	0		0	0	0	0	0	0	0	0	0	0	0	0	0	-1	-1
TCGA-QT-A5XL-01	PCPG		0		0		0	0	0	0	0			0	0	0	0	0	0	0	0	0
TCGA-QT-A5XM-01	PCPG		0		0	0	0		0	0	0	0	0	0	0	0	0	0	0	0	0	0	0
TCGA-QT-A5XN-01	PCPG		0	-1	0	0		0		0	0	0	0	0		0	0		0	0	0	0
TCGA-QT-A5XO-01	PCPG		0			0	0	0		0	0		0	0	0	0		0			0	0	-1
TCGA-QT-A5XP-01	PCPG		0	0	0	0	0	0	0		0	0	0	1		0	0		0	0	0	0	-1
TCGA-QT-A69Q-01	PCPG	-1	-1	0	-1		0	1	0	0	0		0	1	-1	0	-1	-1	0	0	0	-1	-1
TCGA-QT-A7U0-01	PCPG	0	0	0	0	0	0	1	0	0	0		0	0	0	0	0	0	0	0		0	0
TCGA-RM-A68T-01	PCPG	-1	0	0	0	0	0	0	0	0	0	-1	0	0	0	0	0	0	0	0	0	0	0
TCGA-RM-A68W-01	PCPG	0	0	0		0		0	1	0	0		0	0	0	0	0	0	0	0		0	0
TCGA-RT-A6Y9-01	PCPG	0	0	-1	0	0	0	0	0	0	0	0	0	0	0	0	0	0	0	0	0	0	0
TCGA-RT-A6YA-01	PCPG		0	-1	-1	0	0	0		-1	0	-1	0	0	-1	0	0		0		0	0	0
TCGA-RT-A6YC-01	PCPG		0	0	0	0	0	1	0	0	0	0		0	0	0	0	0	0	0	0	0	0
TCGA-RW-A67V-01	PCPG		0		0		0	0	0	0	0	0	0	0	0	0	0	0	0	0	0	0	0
TCGA-RW-A67W-01	PCPG		0			0	0	0		0	0	0	0	0	0	0	0		0	0	0	-1	0
TCGA-RW-A67X-01	PCPG	0	0	-1	-1	0	0	0	0	0	0	-1	0	0	0	0	0	-1		0	0	0	0
TCGA-RW-A67Y-01	PCPG		0	-1	0		0	0	0	0	0	0	0	0		0	0	-1	0	0	0	0	-1
TCGA-RW-A680-01	PCPG		0	-1	0	0	0	0	0	0	0	0	0	0	0	0	0	0	0	0	0	0	0
TCGA-RW-A681-01	PCPG		0	0	0	0	0	1	1	0	1	-1	1	0	1	1	1		1		1	0	0
TCGA-RW-A684-01	PCPG		0	0	0	0		0	0	0	0		0	0	0	0	0	0	0	0	0	0	0
TCGA-RW-A685-01	PCPG		0		0	0	0	0	0	0	0	0	0	0	0	0	0		0	0	0	0	0
TCGA-RW-A686-01	PCPG		0	0	0	0	0	0	0	0	0	0	0	0	0	0	0	0	0	0	0	0
TCGA-RW-A686-06	PCPG		0	0	0	0	0	0	0	0	0	0	0	0	0	0	0	0	0	0	0	0
TCGA-RW-A688-01	PCPG		0			0	0	0	0	0		0	0	0	0	0	0		0	0	0	0	0
TCGA-RW-A689-01	PCPG		0	-1	0	0	0	0	0	0	0		0	0	0	0	0		0	0	0	0	0
TCGA-RW-A68A-01	PCPG			-1	0	0	0	0	-1	0	0		0	-1	0	0	0		0	0	0	0	0
TCGA-RW-A68B-01	PCPG		0		0	0	0	0	0	0	1	0	0	0	0	0	0	0	0	0	0	0	0
TCGA-RW-A68C-01	PCPG	0	0	-1		0	0	0	0	0	0	-1	0	0		0	0	0	0	0	0	0	0
TCGA-RW-A68D-01	PCPG	0		0		0	0	0		0	0			0	0	0	0	0	0	0	0	0	0
TCGA-RW-A68F-01	PCPG	0		0	0	0	0	0	0	0	0	-1	0	1	0	0	0		0	0	0	0	0
TCGA-RW-A68G-01	PCPG	0		0	0	0	0		0	0	0	0	0	0	0	0	0			0	0	0	0
TCGA-RW-A7CZ-01	PCPG	0	0	-1	0	0	0	0	0	0	0	-1	0	0	0	0	0	0	0	0	0	0	0
TCGA-RW-A7D0-01	PCPG		0		0	0	0	0	0	0	0	0	0	0	0	0	0		0	0	0	0	0
TCGA-RW-A8AZ-01	PCPG		0	0	0	0	0	0			0			0	0	0	0	0	0	0	0	0	0
TCGA-RX-A8JQ-01	PCPG		0	0	0	0	0		0	0	0	0	0	0	0	0	0	0	0	0	0	0	0
TCGA-S7-A7WL-01	PCPG		0	-1	0		0	1			0		0	0	0	0	0		0	0	0	0	-1
TCGA-S7-A7WM-01	PCPG		0		0	0		0	0	0	0	0	0	0	0	0	0		0	0	0	0	-1
TCGA-S7-A7WN-01	PCPG		0	0	0	0		0	0	0	0			0	0	1	0	0	0	0	0	0	0
TCGA-S7-A7WO-01	PCPG	0	0	0	0	0	0	0	0	0	0	0	0	0	0	0	0	0	0	0	0	0	0
TCGA-S7-A7WP-01	PCPG	0	0	-1	0	0	0	0	0	0	0	-1	0	0	0	0	0	0	0		0	-1	0
TCGA-S7-A7WQ-01	PCPG	-1	0	-1	0	0	0	0	0	0	0	-1	0	0	0	0	0	-1	0	0	0	-1	-1
TCGA-S7-A7WR-01	PCPG		0	-1	0	0		0	-1	0	0	0	0	0	-1	0	0	0	0	0	0	0	-1
TCGA-S7-A7WT-01	PCPG		0		0	0	0	0		0	0	0	0	0	0	0	0	0	0	0	0	0	0
TCGA-S7-A7WU-01	PCPG	0	0	0	0	0	0	0	0	0	0	-1	0	0	0	0	0	0	0	0	0	0	0
TCGA-S7-A7WV-01	PCPG	0	0	0	0	0	0	0	0	0	0	0	0	0	-1	0	0	0	0	0	0	0	0
TCGA-S7-A7WW-01	PCPG	0	0	0	0	0	0	1	1	0	0	-1	0	0	0	1	0		0	1	0	0	0
TCGA-S7-A7WX-01	PCPG		0		0	0	0	0	0	0	0	0	0	0	0	0	0		0	0	0	0	-1
TCGA-S7-A7X0-01	PCPG			-1	0	0	0	0	0	0	0	-1	0	0	0	0	0	0	0	0	0	0	0
TCGA-S7-A7X1-01	PCPG	0	0	-1	0	0	0	0	0	0	0	-1	0	0	0	0	0	-1	0	0	0	0	0
TCGA-S7-A7X2-01	PCPG		0		0	0	0	0	0	0	0	0	0	0	0	0	0			0	0	0	-1
TCGA-SA-A6C2-01	PCPG	0	0	0	0	0	0	0	0	0	0	0	0	0	0	0	0	0	0	0	0	0	0
TCGA-SP-A6QC-01	PCPG			0	0	0	0	0	0	0		0	0	0	0	0	0	0	0	0	0	-1	0
TCGA-SP-A6QD-01	PCPG		0	0	0	0	0	0	0	0	0		0	0	0	0	0		0		0	0	0
TCGA-SP-A6QF-01	PCPG		0		0	0	0			0	0	0	0	-1	0	0	0	0		0	0	0	0
TCGA-SP-A6QG-01	PCPG			-1	0	0	0	0	0	0	0	0	0	0	0	0	0	0	0		0	0
TCGA-SP-A6QI-01	PCPG		0		0	0	0	0	0	0	0	0	0	0	0	0	0	0	0	0		0	0
TCGA-SP-A6QJ-01	PCPG		0		0	0	0	0	0	0	0	0			0	0	0	0	0	0	0	0	-1
TCGA-SP-A6QK-01	PCPG		0		0	0	0	0	0	0	0	0	0	0	0	0	0	0	0	0	0	-1	-1
TCGA-SQ-A6I4-01	PCPG		0		0	0	0	0	0	0	0	0	0	0	0	0	0	0	0	0	0	0	0
TCGA-SQ-A6I6-01	PCPG		0	-1	0	0	0	0	0	0	0	0	0	0	0	0	0	-1	0	0	0	0	-1
TCGA-SR-A6MP-01	PCPG		0		0	0	0	0	0		0	0	0	0	0	0	0	-1	0	0	0	-1	-1
TCGA-SR-A6MQ-01	PCPG		0		0		0		0	0	0	0	0	0	0	-1	0	0	0		0	0
TCGA-SR-A6MS-01	PCPG		0	0	0	0	0	0	1	0	0	0	0	0	-1	0	0	0			0	0	0
TCGA-SR-A6MT-01	PCPG	-1	-1	-1	-1	0	-1	1	-1	0	0	-1	0	0	0	-1	-1	-1	0	1	0	-1	0
TCGA-SR-A6MU-01	PCPG		0	0	0	0	0	0	1	0	0		0	0	0	0	0	0	0	0	0	0	0
TCGA-SR-A6MV-01	PCPG		0	-1	0	0	0	0	0	-1	0		0	0	-1	-1	0	0	0		0	-1	0
TCGA-SR-A6MX-01	PCPG				0	0		0		0	0	0	0	0	0	0		0	0	0	0		-1
TCGA-SR-A6MX-05	PCPG				0	0		0		0	0		0	0	0	0	0	0	0	0	0	0	-1
TCGA-SR-A6MX-06	PCPG				0	0		0		0	0			0	0	0	-1	0	0	0	0		-1
TCGA-SR-A6MY-01	PCPG		0		0			0	0	0	0	0	0	0	0	0	0	0	0	0	0	0
TCGA-SR-A6MZ-01	PCPG		0		0		0	0		0	1	0	1	0	0	0	0	0	0	0	0	0	0
TCGA-SR-A6N0-01	PCPG	0	0	0	0	1	0	1	1	0	0	-1	0	1	0	0	0	0	0	1	0	0	0
TCGA-TT-A6YJ-01	PCPG		0		0	0		0	0	0	0	0	0	0	0	0	0		0	0	0	0	0
TCGA-TT-A6YK-01	PCPG		0	-1	0	0	0	0	0	0	0		0	0	0	0	0		0		0	-1	0
TCGA-TT-A6YN-01	PCPG		0		0	0	0	0	0	0	0		0	0	0	0	0		0	0		-1	0
TCGA-TT-A6YO-01	PCPG	0	0	0	0	0	0	0	0	0	0	0	0	0	0	0	0	0	0	0	0	0	0
TCGA-TT-A6YP-01	PCPG	0	0	-1	-1	0	0	0	0	0	0	-1	0	0	0	0	0	0	0	0	0	0	0
TCGA-W2-A7H5-01	PCPG		0	-1	0	1	1	0	-1	-1	1		1	-1	-1	1	1	0	0	1	0	-1	-1
TCGA-W2-A7H7-01	PCPG		0	-1	0		0	0			0		0	0	0	0	0	0		0	0	-1	0
TCGA-W2-A7HA-01	PCPG		0	-1	0	0	0	0	0	0	0	0	0	0	0	0	0		0	0	0	-1	-1
TCGA-W2-A7HB-01	PCPG		-1		0	0	0	0	0	0	0	0	0	0	0	0	0	0	0	0	0	-1	-1
TCGA-W2-A7HC-01	PCPG		0		0	0		0	0	0	0	0	0	0	0	0	0		0	0		0	-1
TCGA-W2-A7HD-01	PCPG		0		0	0	0	0		0	0	0		0	0	0	0	0	0	0	0	0	-1
TCGA-W2-A7HE-01	PCPG		0	0	0	0	0	0		0	1	0	0	0	0	0	0	0	0	0	0	0	-1
TCGA-W2-A7HF-01	PCPG		0	-1	0	0	0		0	0	0	0	0	0	-1	-1	0	0	0	0	0	0
TCGA-W2-A7HH-01	PCPG	0	0	0	0	0	0	0	0	0	0	0	0	0	0	0	0	0	0	0	0	0	0
TCGA-W2-A7UY-01	PCPG		0	-1	0			0	0	0	0	-1	0	0	0	1	0		0	0		0	-1
TCGA-WB-A80K-01	PCPG		0	0	1	1	0	0		0	0	0	0	0	0	0	0	0	0	0	0	0	0
TCGA-WB-A80L-01	PCPG	0	0	0	0	0	1	1	0	1		0	0	0	0	1	0	0	1	1	1	-1	0
TCGA-WB-A80M-01	PCPG		0		0		0	0	0	0	0		0	0	0	0	0	0	0	0	0	0	0
TCGA-WB-A80N-01	PCPG		0		0	0	0	0	0	0	0	0	0	0	0	0	0		0	0		0	0
TCGA-WB-A80O-01	PCPG		0	0	0	0		0	0	0	0		0	0	0	0	0			0	0	0	0
TCGA-WB-A80P-01	PCPG		0	0	0	0	0	0	0	0	0	0	0	0	0	0	0		0	0	0	0	0
TCGA-WB-A80Q-01	PCPG	0	0	0	0	0	0	0	0	0	0	0	0	0	0	0	0	0	0	0	0	0	0
TCGA-WB-A80V-01	PCPG		0	-1	0	0		0	-1	0	0	0	0	0	0	0	0		0	0	0	0	-1
TCGA-WB-A80Y-01	PCPG	0	0			0	0	0	0	0	0	0	0	0	0	0	0		0		0	0	-1
TCGA-WB-A814-01	PCPG	0	0	-1	0	0	0	0	0	0	0		0	0	0	0	0	0	0	0	0	0	0
TCGA-WB-A815-01	PCPG				0		0		0	0	0		0	0	-1	0	0		0	0	0	-1	-1
TCGA-WB-A816-01	PCPG		0		0	0	0	0	0	0	0		0	0	0	0	0	0	0	0	0	-1	0
TCGA-WB-A817-01	PCPG	0	0	0	0	0	0	0	0	0	0	0	0	0	0	0	0	0	0	0	0	0	0
TCGA-WB-A818-01	PCPG		0		0	0	0	0	0	0	0	0	0	0	0	0	0		0	0	0	0
TCGA-WB-A819-01	PCPG		0	-1	0	0		0	0	0	0	0	0	0	0	0	0	0	0	0	0	0	0
TCGA-WB-A81A-01	PCPG	0	0	0	0		0	1	0	0		0	0	0	0	1		0	0	1	1	0	0
TCGA-WB-A81D-01	PCPG			0	0	0	0	0		0	0		0	0	0	0	0		0	0		0
TCGA-WB-A81E-01	PCPG	-1	0		0	0	0	0	0	0	0	0	0	0	0	0	0		0	0	0	0	0
TCGA-WB-A81F-01	PCPG		0		0	0	0		0	0	0	0	0	0	0	0			0	0	0	0	0
TCGA-WB-A81G-01	PCPG		0		0	0	0	0	0	0	0	0	0	0	0	0	0	0	0	0	0	0	0
TCGA-WB-A81H-01	PCPG		0	0	0	0	0	0	0	0	0	0	0	0	0	0	0		0		0	-1	-1
TCGA-WB-A81I-01	PCPG	0	0	0	0	0	0	0	0	0			0	0	0	0	0	0	0	0	0	0	0
TCGA-WB-A81J-01	PCPG	0	0	0		0	0	0	0	0	0	0	0	0	0	0	0		0	0	0	0	0
TCGA-WB-A81K-01	PCPG		0		0		0	0	0	0	0		0	0	-1	0	0	0	0	0	0	0	0
TCGA-WB-A81M-01	PCPG		0	0	0	0	0	0	0	0	0		0	0	0	0	0		0	0	0	-1	0
TCGA-WB-A81N-01	PCPG	0	0	0	0	0	0		0	0	0	0	0	0	0	0	0		0	0	0	0	-1
TCGA-WB-A81P-01	PCPG		0	0	0	0	0	0		0	0		0	0	0	0	0		0	0	0	0	0
TCGA-WB-A81Q-01	PCPG		0		0	0	0	0		0	0	0	0	0	0	0			0		0	0	-1
TCGA-WB-A81R-01	PCPG		0		0	0		0			0	0	0	0	0	0	0	0	0	0	0	0	-1
TCGA-WB-A81S-01	PCPG		0		0		-1	0	0	0	0	-1		0	-1	0	-1		0		0	-1	0
TCGA-WB-A81T-01	PCPG		0					0		0	0	0	0	0	0	0	0		0	0	0	0	-1
TCGA-WB-A81V-01	PCPG		0	0	0	0	0		0	0	0	-1	0	0	0	0	0	0	0	0	0	0	0
TCGA-WB-A81W-01	PCPG		0	-1	0	0	0	0	0	0	0	0	0	0	0	0	0			0	0	0	-1
TCGA-WB-A821-01	PCPG	-1	-1	-1	-1	1	1	1	0	0	0	-1	1	1	-1	0	0	0	-1	0	1	-1	0
TCGA-WB-A822-01	PCPG		0		0	0	0	0	0	0	0		0	0	0	0	0		0	0	0	0	0
TCGA-XG-A823-01	PCPG	0	0	0	0	0	0	0	0	0	0	-1	0	0	0	0	0	0	0	0	0	0	0
TCGA-4C-A93U-01	THCA		0	0	0	0	0	0	0		0	0	0	0	0	0	0	0	0	0	0	0	-1
TCGA-BJ-A0YZ-01	THCA	0	0	0	0	0	0	0	0	0	0	0	0	0	0	0	0	0	0		0	0	0
TCGA-BJ-A0Z0-01	THCA	0	0	0	0	0	0	0	0	0			0	0	0	0	0	0	0	0	0	0	0
TCGA-BJ-A0Z2-01	THCA	0	0	0	0	0	0	0	0	0	0	0	0	0	0	0	0	0	0	0	0	0	-1
TCGA-BJ-A0Z3-01	THCA	0	0	0	0	0	0	0	0	0	0	0	0	0	0	0	0	0	0	0	0	0	0
TCGA-BJ-A0Z9-01	THCA	0	0	0	0	0	0	0	0	0	0	0	0	0	0	0	0	0	0	0	0	0	0
TCGA-BJ-A0ZA-01	THCA	0	0	0	0	0	0	0	0	0	0	0	0	0	0	0	0	0	0	0	0	0	0
TCGA-BJ-A0ZB-01	THCA	0	0	0	0	0	0	0	0	0	0	0	0	0	0	0	0	0	0	0	0	0	0
TCGA-BJ-A0ZC-01	THCA	0	0	0	0	0	0	0	0	0		0	0	0	0	0	0	0	0	0	0	0	0
TCGA-BJ-A0ZE-01	THCA	0	0	0	0	0	0	0	0	0	0	0	0	0	0	0	0	0	0	0	0	0	0
TCGA-BJ-A0ZG-01	THCA	0	0	0	0	0	0	0	0	0	0	0	0	0	0	0	0	0	0	0	0	0	0
TCGA-BJ-A0ZH-01	THCA	0	0	0	0	0	0	0	0	0	0	0	0	0	0	0	0	0	0	0	0	0	0
TCGA-BJ-A0ZJ-01	THCA	0	0	0	0	0	0	0	0	0	0	0	0	0	0	0	0	0	0	0	0	0	0
TCGA-BJ-A18Y-01	THCA	0	0	0	0	0	0	0	0	0	0	0	0	0	0	0	0	0	0	0	0	0	-1
TCGA-BJ-A18Z-01	THCA	0	0	0	0	0	0	0	0	0	0	0	0	0	0	0	0	0	0	0	0	0	0
TCGA-BJ-A191-01	THCA	0	0	0	0	0	0	0	0	0	0	0	0	0	0	0	0	0	0	0	0	0	0
TCGA-BJ-A28R-01	THCA	0	0	0	0	0	0	0	0	0	0	0	0	0	0	0	0	0	0	0	0	0	0
TCGA-BJ-A28S-01	THCA	0	0	0	0	0	0	0	0	0	0	0	0	0	0	0	0	0	0	0	0	0	0
TCGA-BJ-A28T-01	THCA	0	0	0	0	0	0	0	0	0	0	0	0	0	0	0	0	0	0	0	0	0	0
TCGA-BJ-A28V-01	THCA	0	0	0	0	0	0	0	0	0	0	0	0	0	0	0	0	0	0	0	0	0	0
TCGA-BJ-A28X-01	THCA	0	0	0	0	0	0	0	0	0	0	0	0	0	0	0	0	0	0	0	0	0	0
TCGA-BJ-A290-01	THCA			0	0	0	0	0	0	0	0	0	0	0	0	0	0	0	0	0	0	0	0
TCGA-BJ-A291-01	THCA	0	0	0	0	0	0	0	0	0	0	0	0	0	0	0	0	0	0	0	0	0	0
TCGA-BJ-A2N7-01	THCA	0	0	0	0	0	0	0	0	0	0	0	0	0	0	0	0	0	0	0	0	0	0
TCGA-BJ-A2N8-01	THCA	0	0	0	0	0	0	0	0	0	0	0	0	0	0	0	0	0	0	0	0	0	0
TCGA-BJ-A2N9-01	THCA	0	0	0	0	1	0	1	0	0	0	0	1		0	0	1	0	0	0	0	0	0
TCGA-BJ-A2NA-01	THCA	0	0	0	0	0	0	0	0	0	0	0	0	0	0	0	0	0	0	0	0	0	0
TCGA-BJ-A2P4-01	THCA	0	0	0	0	0	0	0	0	0	0	0	0	0	0	0	0	0	0	0	0	0	-1
TCGA-BJ-A3EZ-01	THCA	0	0	0	0	0	0	0	0	0	0	0	0	0	0	0	0	0	0	0	0	0	0
TCGA-BJ-A3F0-01	THCA	0	0	0	0	0	0	0	0	0	0	0	0	-1	0	-1	0	0	0	0	0	0	0
TCGA-BJ-A3PR-01	THCA	0	0	0	0	0	0	0	0	0	0	0	0	0	0	0	0	0	0	0	0	0	0
TCGA-BJ-A3PT-01	THCA	0	0	0	0	0	0	0	0	0	0	0	0	0	0	0	0	0	0	0	0	0	-1
TCGA-BJ-A3PU-01	THCA	0	0	0	0	0	0	0	0	0	0	0	0	0	0	0	0	0	0	0	0	0	0
TCGA-BJ-A45D-01	THCA	0	0	0	0	0	0	0	0	0	0	0	0	0	0	0	0	0	0	0	0	0	-1
TCGA-BJ-A45E-01	THCA	0	0	0	0	0	0	1	0	0	0	0	0	1	0	0	0	0	1	0	0	1	1
TCGA-BJ-A45F-01	THCA	0	0	0	0	0	0	0	0	0	0	0	0	0	0	0	0	0	0	0	0	0	0
TCGA-BJ-A45G-01	THCA	0	0	0	0	0	0	0	0	0	0	0	0	0	0	0	0	0	0	0	0	0	0
TCGA-BJ-A45H-01	THCA	0	0	0	0	0	0	0	0	0	0	0	0	0	0	0	0	0	0	0	0	0	0
TCGA-BJ-A45I-01	THCA	0	0	0	0	0	0	0	0	0	0	0	0	0	0	0	0	0	0	0	0	0	0
TCGA-BJ-A45K-01	THCA	0	0	0	0	0	0	0	0	0	0	0	0	0	0	0	0	0	0	0	0	0	0
TCGA-BJ-A4O8-01	THCA	0	0	0	0	0	0	0	0	0	0	0	0	0	0	0	0	0	0	0	0	0	0
TCGA-BJ-A4O9-01	THCA	0	0	0	0		0	0	0	0	0	0	0	0	0	0	0	0	0	0	0	0	0
TCGA-CE-A13K-01	THCA	0	0	0	0	0	0	0	0	0	0	0	0	0	0	0	0	0	0	0	0	0	0
TCGA-CE-A27D-01	THCA	0	0	0	0	0	0	0	0	0	0	0	0	0	0	0	0	0	0	0	0	0	0
TCGA-CE-A3MD-01	THCA	0	0	0	0	0	0	0	0	0	0	0	0	0	0	0	0	0	0	0	0	0	0
TCGA-CE-A3ME-01	THCA	0	0	0	0	0	0	0	0	0	0	0	0	0	0	0	0	0	0	0	0	0	0
TCGA-CE-A482-01	THCA	0	0	0	0	0	0	0	0	0	0	0	0	0	0	0	0	0	0	0	0	0	0
TCGA-CE-A483-01	THCA	0	0	0	0	0	0	0	0	0	0	0	0	0	0	0	0	0	0	0	0	0	0
TCGA-CE-A484-01	THCA	0	0	0	0	0	0	0	0	0	0	0	0	0	0	0	0	0	0	0	0	0	-1
TCGA-CE-A485-01	THCA	0	0	0	0	0	0	0	0	0	0	0	0	0	0	0	0	0	0	0	0	0	0
TCGA-DE-A0XZ-01	THCA	0	0	0	0	0	0	0	0	0	0	0	0	0	0	0	0	0	0	0	0	0	-1
TCGA-DE-A0Y2-01	THCA	0	0	0	0	0	0	0	0	0	0	0	0	0	0	0	0	0	0	0	0	0	0
TCGA-DE-A0Y3-01	THCA	0	0	0	0	0	0	0	0	0	0	0	0	0	0	0	0	0	0	0	0	0	0
TCGA-DE-A2OL-01	THCA	0	0	0	0	0	0	0	0	0	0	0	0	0	0	0	0	0	0	0	0	0	0
TCGA-DE-A3KN-01	THCA	0	0	0	0	0	0	0	0	0		0	0	0	0	0	0	0	0	0	0	0	0
TCGA-DE-A4M8-01	THCA	0	0	0	0	0	0	0	0	0	0	0	0	0	0	0	0	0	0	0	0	0	-1
TCGA-DE-A4M9-01	THCA	0	0	0	0	0	0	0	0	0	0	0	0	0	0	0	0	0	0	0	0	0	0
TCGA-DE-A4MA-01	THCA	0	0	0	0	0	0	0	0	0	0	0	0	0	0	0	0	0	0	0	0	0	0
TCGA-DE-A4MB-01	THCA		0	0	0		0	0	0		0	0	0	0	0	0	0	0	0	0	0	0	0
TCGA-DE-A4MC-01	THCA		0	0	0	0	0	0	0	0	0	0	0	0	0	0	0	0	0	0	0	0	0
TCGA-DE-A4MD-01	THCA		0	0	0	0	0	0	0	0	0		0	0	0	0	0	0	0	0	0	0	0
TCGA-DE-A4MD-06	THCA		0	0	0	0	0	0	0	0	0		0	0	0	0	0	0	0	0	0	0	0
TCGA-DE-A69J-01	THCA	0	0	0	0	0	0	0	0	0	0	0	0	0	0	0	0	0	0	0	0	0	0
TCGA-DE-A69K-01	THCA	0	0	0	0	0	0	0	0	0	0	0	0	0	0	0	0	0	0	0	0	0	0
TCGA-DE-A7U5-01	THCA	0	0	0	0	0	0	0	0	0	0	0	0	0	0	0	0	0	0	0	0	0	0
TCGA-DJ-A13L-01	THCA	0	0	0	0	0	0	0	0		0	0	0	0	0	0	0	0	0	0	0	0	0
TCGA-DJ-A13M-01	THCA	0	0	0	0	0	0	0	0	0	0	0	0	0	0	0	0	0	0	0	0	0	-1
TCGA-DJ-A13O-01	THCA	0	0	0	0	0	0	0	0	0	0	0	0	0	0	0	0	0	0	0	0	0	0
TCGA-DJ-A13P-01	THCA	0	0	0	0	0	0	0	0	0	0	0	0	-1	0	0	0	0	0	0	0	0	0
TCGA-DJ-A13R-01	THCA	0	0	0	0	0	0	0	0	0	0	0	0	0	0	0	0	0	0	0	0	0	0
TCGA-DJ-A13S-01	THCA	0	0	0	0	0	0	0	0	0	0	0	0	0	0	0	0	0	0	0	0	0	0
TCGA-DJ-A13T-01	THCA	0	0	0	0	0	0	0	0	0	0	0	0	0	0	0	0	0	0	0	0	0	-1
TCGA-DJ-A13U-01	THCA		0	0	0	0	0	0	0	0	0	0	0	0	0	0	0	0	0	0	0	0	0
TCGA-DJ-A13V-01	THCA	0	0	0	0	0	0	0	0	0	0	0	0	0	0	0	0	0	0	0	0	0	0
TCGA-DJ-A13W-01	THCA	0	0	0	0	0	0	0	0	0	0	0	0	0	0	0	0	0	0	0	0	0	0
TCGA-DJ-A13X-01	THCA	0	0	0	0	0	0	0	0	0	0	0	0	0	0	0	0	0	0	0	0	0	0
TCGA-DJ-A1QD-01	THCA	0	0	0	0	0	0	0	0	0	0	0	0	0	0	0	0	0	0	0	0	0	0
TCGA-DJ-A1QE-01	THCA	0	0	0	0	0	0	0	0	0	0	0	0	0	0	0	0	0	0	0	0	0	0
TCGA-DJ-A1QF-01	THCA	0	0	0	0	0	0	0	0	0	0	0	0	0	0	0	0	0	0	0	0	0	0
TCGA-DJ-A1QG-01	THCA	0	0	0	0	0	0	0	0	0	0	0	0	0	0	0	0	0	0	0	0	0	-1
TCGA-DJ-A1QH-01	THCA	0	0	0	0	0	0	0	0	0	0	0	0	0	0	0	0	0	0	0	0	0	0
TCGA-DJ-A1QI-01	THCA	0	0	0	0	0	0	0	0	0	0	0	0	0	0	0	0	0	0	0	0	0	0
TCGA-DJ-A1QL-01	THCA	0	0	0	0	0	0	0	0	0	0	0	0	0	0	0	0	0	0	0	0	0	0
TCGA-DJ-A1QM-01	THCA	0	0	0	0	0	0	0	0	0	0	0	0	0	0	0	0	0	0	0	0	0	0
TCGA-DJ-A1QN-01	THCA	0	0	0	0	0	0	0	0	0	0	0	0	-1	0	0	0	0	0	0	0	0	-1
TCGA-DJ-A1QO-01	THCA	0	0	0	0	0	0	0	0	0	0	0	0	0	0	0	0	0	0	0	0	0	0
TCGA-DJ-A1QQ-01	THCA	0	0	0	0	0	0	0	0	0	0	0	0	0	0	0	0	0	0	0	0	0	0
TCGA-DJ-A2PN-01	THCA	0	0	0	0	0	0	0	0	0	0	0	0	0	0	0	0	0	0	0	0	0	0
TCGA-DJ-A2PO-01	THCA	0	0	0	0	0	0	0	0	0	0	0	0	0	0	0	0	0	0	0	0	0	0
TCGA-DJ-A2PP-01	THCA	0	0	0	0	0	0	0	0	0	0	0	0	0	0	0	0	0	0	0	0	0	0
TCGA-DJ-A2PQ-01	THCA	0	0	0	0	0	0	0	0	0	0	0	0	0	0	0	0	0	0	0	0	0	0
TCGA-DJ-A2PR-01	THCA	0	0	0	0	0	0	0	0	0	0	0	0	0	0	0	0	0	0	0	0	0	0
TCGA-DJ-A2PS-01	THCA	0	0	0	0	0	0	0	0	0	0	0	0	0	0	0	0	0	0	0	0	0	0
TCGA-DJ-A2PT-01	THCA	0	0	0	0	0	0	0	0	0	0	0	0	0	0	0	0	0	0	0	0	0	0
TCGA-DJ-A2PU-01	THCA	0	0	0	0	0	0	0	0	0	0	0	0	0	0	0	0	0	0	0	0	0	0
TCGA-DJ-A2PV-01	THCA	0	0	0	0	0	0	0	0	0	0	0	0	0	0	0	0	0	0	0	0	0	-1
TCGA-DJ-A2PW-01	THCA	0	0	0	0	0	0	0	0		0	0	0	0	0	0	0	0	0	0	0	0	0
TCGA-DJ-A2PX-01	THCA	0	0	0	0	0	0	0	0	0	0	0	0	0	0	0	0	0	0	0	0	0	0
TCGA-DJ-A2PY-01	THCA	0	0	0	0	0	0	0	0	0	0	0	0	0	0	0	0	0	0	0	0	0	0
TCGA-DJ-A2PZ-01	THCA	0	0	0	0	0	0	0	0	0	0	0	0	0	0	0	0	0	0	0	0	0	0
TCGA-DJ-A2Q0-01	THCA	0	-1	0	0	0	1	1	-1	-1	0	0	0	0	0	0	1	1	-1	0	0	-1	-1
TCGA-DJ-A2Q1-01	THCA	0	0	0	0	0	0	0	0	0	0	0	0	0	0	0	0	0	0	0	0	0	0
TCGA-DJ-A2Q2-01	THCA	0	0	0	0	0	0	0	0	0	0	0	0	0	0	0	0	0	0	0	0	0	0
TCGA-DJ-A2Q3-01	THCA	0	0	0	0	0	0	0	0	0	0	0	0	0	0	0	0	0	0	0	0	0	0
TCGA-DJ-A2Q4-01	THCA	0	0	0	0	0	0	0	0	0	0	0	0	0	0	0	0	0	0	0	0	0	0
TCGA-DJ-A2Q5-01	THCA	0	0	0	0	0	0	0	0	0	0	0	0	0	0	0	0	0	0	0	0	0	0
TCGA-DJ-A2Q6-01	THCA	0	0	0	0	0	0	0	0	0	0	0	0	0	0	0	0	0	0	0	0	0	0
TCGA-DJ-A2Q7-01	THCA	0	0	0	0	0	0	0	0	0	0	0	0	0	0	0	0	0	0	0	0	0	-1
TCGA-DJ-A2Q8-01	THCA	0	0	0	0	0	0	0	0	0	0	0	0	0	0	0	0	0	0	0	0	0	0
TCGA-DJ-A2QA-01	THCA	0	0	0	0	0	0	0	0	0	0	0	0	0	0	0	0	0	0	0	0	0	-1
TCGA-DJ-A2QB-01	THCA	0	0	0	0	0	0	0	0	0	0	0	0	0	0	0	0	0	0	0	0	0	-1
TCGA-DJ-A2QC-01	THCA	0	0	0	0	0	0	0	0	0	0	0	0	0	0	0	0	0	0	0	0	0	0
TCGA-DJ-A3UK-01	THCA	0	0	0	0	0	0	0	0	0	0	0	0	0	0	0	0	0	0	0	0	0	0
TCGA-DJ-A3UM-01	THCA	0	0	0	0	0	0	0	0	0	0	0	0	0	0	0	0	0	0	0	0	0	0
TCGA-DJ-A3UN-01	THCA	0	0	0	0	0	0	0	0	0	0	0	0	0	0	0	0	0	0	0	0	0	-1
TCGA-DJ-A3UO-01	THCA	0	0	0	0	0	0	0	0	0	0	0	0	0	0	0	0	0	0	0	0	0	-1
TCGA-DJ-A3UP-01	THCA	0	0	0	0	0	0	0	0	0	0	0	0	0	0	0	0	0	0	0	0	0	-1
TCGA-DJ-A3UQ-01	THCA	0	0	0	0	0	0	0	0	0	0	0	0	0	0	0	0	0	0	0	0	0	0
TCGA-DJ-A3UR-01	THCA	0	0	0	0	0	0	0	0	0	0	0	0	0	0	0	0	0	0	0	0	0	0
TCGA-DJ-A3UT-01	THCA	0	0	0	0	0	0	0	0	0	0	0	0	0	0	0	0	0	0	0	0	0	0
TCGA-DJ-A3UU-01	THCA	0	0	0	0	0	0	0	0	0	0	0	0	0	0	0	0	0	0	0	0	0	0
TCGA-DJ-A3UW-01	THCA	0	0	0	0	0	0	0	0	0	0	0	0	0	0	0	0	0	0	0	0	0	0
TCGA-DJ-A3UY-01	THCA	0	0	0	0	0	0	0	0	0	0	0	0	0	0	0	0	0	0	0	0	0	0
TCGA-DJ-A3V0-01	THCA	0	0	0	0	0	0	0	0	0	0	0	0	0	0	0	0	0	0	0	0	0	0
TCGA-DJ-A3V2-01	THCA	0	0	0	0	0	0	0	0	0	0	0	0	0	0	0	0	0	0	0	0	0	0
TCGA-DJ-A3V3-01	THCA	0	0	0	0	0	0	0	0	0	0	0	0	0	0	0	0	0	0	0	0	0	0
TCGA-DJ-A3V4-01	THCA	0	0	0	0	0	0	0	0	0	0	0	0	0	0	0	0	0	0	0	0	0	0
TCGA-DJ-A3V5-01	THCA	0	0	0	0	0	0	0	0	0	0	0	0	0	0	0	0	0	0	0	0	0	0
TCGA-DJ-A3V8-01	THCA	0	0	0	0	0	0	0	0	0	0	0	0	0	0	0	0	0	0	0	0	0	0
TCGA-DJ-A3V9-01	THCA	0	0	0	0	0	0	0	0	0	0	0	0	0	0	0	0	0	0	0	0	0	0
TCGA-DJ-A3VB-01	THCA	0	0	0	0	0	0	0	0	0	0	0	0	0	0	0	0	0	0	0	0	0	0
TCGA-DJ-A3VD-01	THCA	0	0	0	0	0	0	0	0	0	0	0	0	0	0	0	0	0	0	0	0	0	0
TCGA-DJ-A3VE-01	THCA	0	0	0	0	0	0	0	0	0	0	0	0	0	0	0	0	0	0	0	0	0	0
TCGA-DJ-A3VF-01	THCA	0	0	0	0	0	0	0	0	0	0	0	0	0	0	0	0	0	0	0	0	0	0
TCGA-DJ-A3VG-01	THCA	0	0	0	0	0	0	0	0	0	0	0	0	0	0	0	0	0	0	0	0	0	0
TCGA-DJ-A3VI-01	THCA	0	0	0	0	0	0	0	0	0	0	0	0	0	0	0	0	0	0	0	0	0	0
TCGA-DJ-A3VJ-01	THCA	0	0	0	0	0	0	0	0	0	0	0	0	0	0	0	0	0	0	0	0	0	0
TCGA-DJ-A3VK-01	THCA	0	0	0	0	0	0	0	0	0	0	0	0	0	0	0	0	0	0	0	0	0	-1
TCGA-DJ-A3VL-01	THCA	0	0	0	0	0	0	0	0	0	0	0	0	0	0	0	0	0	0	0	0	0	0
TCGA-DJ-A3VM-01	THCA	0	0	0	0	0	0	0	0	0	0	0	0	0	0	0	0	0	0	0	0	0	-1
TCGA-DJ-A4UL-01	THCA	0	0	0	0	0	0	0	0	0	0	0	0	0	0	0	0	0	0	0	0	0	0
TCGA-DJ-A4UP-01	THCA	0	0	0	0	0	0	0	0	0	0	0	0	0	0	0	0	0	0	0	0	0	0
TCGA-DJ-A4UQ-01	THCA	0	0	0	0	0	0	0	0	0	0	0	0	0	0	0	0	0	0	0	0	0	0
TCGA-DJ-A4UR-01	THCA	0	0	0	0	0	0	0	0	0	0	0	0	0	0	-1	0	0	0	0	0	0	-1
TCGA-DJ-A4UT-01	THCA	0	0	0	0	0	0	0	0	0	0	0	0	0	0	0	0	0	0	0	0	0	0
TCGA-DJ-A4UW-01	THCA	0	0	0	0	0	0	0	0	0	0	0	0	0	0	0	0	0	0	0	0	0	0
TCGA-DJ-A4V0-01	THCA	0	0	0	0	0	0	0	0	0	0	0	0	0	0	0	0	0	0	0	0	0	0
TCGA-DJ-A4V2-01	THCA	0	0	0	0	0	0	0	0	0	0	0	0	0	0	0	0	0	0	0	0	0	0
TCGA-DJ-A4V4-01	THCA	0	0	0	0	0	0	0	0	0	0	0	0	0	0	0	0	0	0	0	0	0	0
TCGA-DJ-A4V5-01	THCA	0	0	0	0	0	0	0	0	0	0	0	0	0	0	0	0	0	0	0	0	0	0
TCGA-DO-A1JZ-01	THCA	0	0	0	0	0	0	0	0	0	0	0	0	0	0	0	0	0	0	0	0	0	0
TCGA-DO-A1K0-01	THCA	0	0	0	0	0	0	0	0	0	0	0	0	0	0	0	0	0	0	0	0	0	0
TCGA-DO-A2HM-01	THCA	0	0	0	0	0	0	0	0	0	0	0	0	0	0	0	0	0	0	0	0	0	0
TCGA-E3-A3DY-01	THCA	0	0	0	0	0	0	0	0	0	0	0	0	0	0	0	0	0	0	0	0	0	0
TCGA-E3-A3DZ-01	THCA	0	0	0	0	0	0	0	0	0	0	0	0	0	0	0	0	0	0	0	0	0	-1
TCGA-E3-A3E0-01	THCA	0	0	0	0	0	0	0	0	0	0	0	0	0	0	0	0	0	0	0	0	0	0
TCGA-E3-A3E1-01	THCA	0	0	0	0	0	0	0	0	0	0	0	0	0	0	0	0	0	0	0	0	0	0
TCGA-E3-A3E2-01	THCA	0	0	0	0	0	0	0	0	0	0	0	0	0	0	0	0	0	0	0	0	0	0
TCGA-E3-A3E3-01	THCA	0	0	0	0	0	0	0	0	0	0	0	0	0	0	0	0	0	0	0	0	0	0
TCGA-E3-A3E5-01	THCA	0	0	0	0	0	0	0	0	0	0	0	0	0	0	0	0	0	0	0	0	0	-1
TCGA-E8-A242-01	THCA	0	0	0	0	0	0	0	0	0	0	0	0	0	0	0	0	0	0	0	0	0	0
TCGA-E8-A3X7-01	THCA	0	0	0	0	0	0	0	0	0	0	0	0	0	0	0	0	0	0	0	0	0	0
TCGA-E8-A413-01	THCA	0	0	0	0	0	0	0	0	0	0	0	0	0	0	0	0	0	0	0	0	0	0
TCGA-E8-A414-01	THCA	0	0	0	0	0	0	0	0	0	0	0	0	0	0	0	0	0	0	0	0	0	0
TCGA-E8-A417-01	THCA	0	0	0	0	0	0	0	0	0	0	0	0	0	0	0	0	0	0	0	0	0	0
TCGA-E8-A418-01	THCA	0	0	0	0	0	0	0	0	0	0	0	0	0	0	0	0	0	0	0	0	0	0
TCGA-E8-A419-01	THCA	0	0	0	0	0	0	0	0	0	0	0	0	0	0	0	0	0	0	0	0	0	0
TCGA-E8-A432-01	THCA		0	0	0	0	0	0	0	-1	-1	0	0	0	0	0	0		0	0	0	-1	-1
TCGA-E8-A434-01	THCA	0	0	0	0	0	0	0	0	0	0	0	0	0	0	0	0	0	0	0	0	0	0
TCGA-E8-A437-01	THCA	0	0	0	0	0	0	0	0	0	0	0	0	0	0	0	0	0	0	0	0	0	0
TCGA-E8-A438-01	THCA	0	0	0	0	0	0	0	0	0	0	0	0	0	0	0	0	0	0	0	0	0	0
TCGA-E8-A44K-01	THCA	0	0	0	0	0	0	0	0	0	0	0	0	0	0	0	0	0	0	0	0	0	0
TCGA-EL-A3CL-01	THCA	0	0	0	0	0	0	0	0	0	0	0	0	0	0	0	0	0	0	0	0	0	-1
TCGA-EL-A3CM-01	THCA	0	0	0	0	0	0	0	0	0	0	0	0	0	0	0	0	0	0	0	0	0	0
TCGA-EL-A3CN-01	THCA	0	0	0	0	0	0	0	0	0	0	0	0	0	0	0	0	0	0	0	0	0	0
TCGA-EL-A3CO-01	THCA	0	0	0	0	0	0	0	0	0	0	0	0	0	0	0	0	0	0	0	0	0	0
TCGA-EL-A3CP-01	THCA	0	0	0	0	0	0	0	0	0	0	0	0	0	0	0	0	0	0	0	0	0	0
TCGA-EL-A3CR-01	THCA	0	0	0	0	0	0	0	0	0	0	0	0	0	0	0	0	0	0	0	0	0	0
TCGA-EL-A3CS-01	THCA	0	0	0	0	0	0	0	0	0	0	0	0	0	0	0	0	0	0	0	0	0	0
TCGA-EL-A3CT-01	THCA	0	0	0	0	0	0	0	0	0	0	0	0	0	0	0	0	0	0	0	0	0	0
TCGA-EL-A3CU-01	THCA	0	0	0	0	0	0	0	0	0	0	0	0	0	0	0	0	0	0	0	0	0	0
TCGA-EL-A3CV-01	THCA	0	0	0	0	0	0	0	0	0	0	0	0	0	0	0	0	0	0	0	0	0	0
TCGA-EL-A3CX-01	THCA	0	0	0	0	0	0	0	0	0	0	0	0	0	0	0	0	0	0	0	0	0	0
TCGA-EL-A3CZ-01	THCA	0	0	0	0	0	0	0	0	0	0	0	0	0	0	0	0	0	0	0	0	0	0
TCGA-EL-A3D1-01	THCA	0	0	0	0	0	0	0	0	0	0	0	0	0	0	0	0	0	0	0	0	0	-1
TCGA-EL-A3D4-01	THCA	0	0	0	0	0	0	0	0	0	0	0	0	0	0	0	0	0	0	0	0	0	-1
TCGA-EL-A3D6-01	THCA	0	0	0	0	0	0	0	0	0	0	0	0	0	0	0	0	0	0	0	0	0	0
TCGA-EL-A3GO-01	THCA	0	0	0	0	0	0	0	0	0	0	0	0	0	0	-1	0	0		0	0	0	0
TCGA-EL-A3GP-01	THCA		0	0	0	0	0	0	0	-1	0	-1	0	0	0	0	-1	0	0	0	0	0	-1
TCGA-EL-A3GQ-01	THCA	0	0	0	0	0	0		0	0	0	0	0	0	0	0	0	0	0	0	0	0	0
TCGA-EL-A3GR-01	THCA	0	0	0	0	0	0	0	0	0	0	0	0	0	0	0	0	0	0	0	0	0	0
TCGA-EL-A3GS-01	THCA	0	0	0	0	0	0	0	0	0	0	0	0	0	0	0	0	0	0	0	0	0	0
TCGA-EL-A3GU-01	THCA		0	0	0		0	0	0	0	0	0	0	0	0	0	0	0	0	0	0	0	0
TCGA-EL-A3GV-01	THCA	0	0	0	0	0	0	0	0	0	0	0	0	0	0	0	0	0	0	0	0	0	0
TCGA-EL-A3GW-01	THCA	0	0	0	0	0	0	0	0	0	0	0	0	0	0	0	0	0	0	0	0	0	-1
TCGA-EL-A3GY-01	THCA	0	0	0	0	0	0	0	0	0	0	0	0	0	0	0	0	0	0	0	0	0	0
TCGA-EL-A3H1-01	THCA	0	0	0	0	0	0	0	0	0	0	0	0	0	0	0	0	0	0	0	0	0	0
TCGA-EL-A3H2-01	THCA	0	0	0	0	0		0	0	0	0	0	0	0	0	0	0	0			0	0	0
TCGA-EL-A3H3-01	THCA	0	0	0	0	0	0	0	0	0	0	0	0	0	0	0	0	0	0	0	0	0	0
TCGA-EL-A3H4-01	THCA	0	0	0	0	0	0	0	0	0	0	0	0	0	0	0	0	0	0	0	0	0	0
TCGA-EL-A3H5-01	THCA		0	0	0	0	0	0	0	0	0	0	0	0	0	0		0	0	0	0	0	0
TCGA-EL-A3H7-01	THCA	0	0	0	0	0	0	0	0	0	0	0	0	0	0	0	0	0	0	0	0	0	0
TCGA-EL-A3H8-01	THCA	0	0	0	0	0	0	0	0	0	0	0	0	0	0	0	0	0	0	0	0	0	0
TCGA-EL-A3MW-01	THCA	0	0	0	0	0	0	0	0	0	0	0	0	0	0	0	0	0	0	0	0	0	0
TCGA-EL-A3MX-01	THCA	0	0		0	0	0	0	0	0	0	0	0	0	0	0		0	0	0	0	0	0
TCGA-EL-A3MY-01	THCA	0	0	0	0	0	0	0	0	0	0	0	0	0	0	0	0	0	0	0	0	0	0
TCGA-EL-A3MZ-01	THCA		0	0	0	0	0	0	0	0	0	0	0	0	0	0	0	0	0	0	0	0	0
TCGA-EL-A3N2-01	THCA	0	0	0	0	0	0	0	0	0	0	0	0	0	0	0	0	0	0	0	0	0	0
TCGA-EL-A3N3-01	THCA	0	0	0	0	0	0	0	0	0	0	0	0	0	0	0	0	0	0	0	0	0	0
TCGA-EL-A3T1-01	THCA	0	0	0	0	0	0	0	0	0	0	0	0	0	0	0	0	0	0	0	0	0	0
TCGA-EL-A3T2-01	THCA	0	0	0	0	0	0	0	0	0	0	0	0	0	0	0	0	0	0	0	0	0	-1
TCGA-EL-A3T3-01	THCA	0	0	0	0	0	0	0	0	0	0	0	0	0	0	0	0	0	0	0	0	0	0
TCGA-EL-A3T6-01	THCA	0	0	0	0	0	0	0	0	0	0	0	0	0	0	0	0	0	0	0	0	0	0
TCGA-EL-A3T7-01	THCA	0	0	0	0	0	0	0	0	0	0	0	0	0	0	0	0	0	0	0	0	0	0
TCGA-EL-A3T8-01	THCA	0	0	0	0	0	0	0	0	0	0	0	0	0	0	0	0	0	0	0	0	0	0
TCGA-EL-A3T9-01	THCA		0	0	0	1	0	1			0	0	0	0	0	0	1	0	0	0	1	0	0
TCGA-EL-A3TA-01	THCA	0	0	0	0	0	0	0	0	0	0	0	0	0	0	0	0	0	0	0	0	0	0
TCGA-EL-A3TB-01	THCA	0	0	0	0	0	0	0	0	0	0	0	0	0	0	0	0	0	0	0	0	0	0
TCGA-EL-A3ZG-01	THCA	0	0	0	0	0	0	0	0	0	0	0	0	0	0	0	0	0	0	0	0	0	0
TCGA-EL-A3ZH-01	THCA	0	0	0	0	0	0	0	0	0	0	0	0	0	0	0	0	1	0	0	0	0	0
TCGA-EL-A3ZK-01	THCA	0	0	0	0	0	0	0	0	0	0	0	0	0	0	0	0	0	0	0	0	0	0
TCGA-EL-A3ZL-01	THCA	0	0	0	0	0	0	0	0	0	0	0	0	0	0	0	0	0	0	0	0	0	-1
TCGA-EL-A3ZM-01	THCA	0	0	0	0	1	0	1	0	0	0	0	0	0	0	0	0		0	0	0	0	0
TCGA-EL-A3ZN-01	THCA	0	0	0	0	0	0	0	0	0	0	0	0	0	0	0	0	0	0	0	0	0	0
TCGA-EL-A3ZO-01	THCA		0	0	0		0	0	0	-1	0	0	0	0	0	0	0	0	0	0	0	0	0
TCGA-EL-A3ZP-01	THCA	0	0	0	0	0	0	0	0	0	0	0	0	0	0	0	0	0	0	0	0	0	0
TCGA-EL-A3ZQ-01	THCA	0	0	0	0	0	0	0	0	0	0	0	0	0	0	0	0	0	0	0	0	0	0
TCGA-EL-A3ZR-01	THCA	0	0	0	0	0	0	0	0	0	0	1	0	0	1	0	0	1	1	0	0	1	0
TCGA-EL-A3ZS-01	THCA	0	0	0	0	0	0	0	0	0		0	0	0	0	0	0	0	0	0	0	0	0
TCGA-EL-A3ZT-01	THCA	0	0	0	0	0	0	0	0	0	0	0	0	0	0	0	0	0	0	0	0	0	0
TCGA-EL-A4JV-01	THCA	0	0	0	0	0	0	0	0	0	0	0	0	0	0	0	0	0	0	0	0	0	0
TCGA-EL-A4JW-01	THCA	0	0	0	0	0	0	0	0	0	0	0	0	0	0	0	0	0	0	0	0	0	0
TCGA-EL-A4JX-01	THCA		0	0	0	0	0	0	0	0	0	0	0	0	0	0	0	0	0	0	0	0	0
TCGA-EL-A4JZ-01	THCA	0	0	0	0	0	0	0	0	0	0	0	0	0	0	0	0	0	0	0	0	0	-1
TCGA-EL-A4K0-01	THCA	0	0	0	0	0	0	0	0	0	0	0	0	0	0	0	0	0	0	0	0	0	0
TCGA-EL-A4K1-01	THCA	0	0	0	0	0	0	0	0	0	0	0	0	0	0	0	0	0	0	0	0	0	0
TCGA-EL-A4K2-01	THCA	0	0	0	0	0	0	0	0	0	0	0	0	0	0	0	0	0	0	0	0	0	0
TCGA-EL-A4K4-01	THCA	0	0	0	0	0	0	0	0	0	0	0	0	0	0	0	0	0	0	0	0	0	0
TCGA-EL-A4K6-01	THCA	0	0	0	0	0	0	0	0	-1	0	-1	0	0	0	0	0	0	0	0	0	0	-1
TCGA-EL-A4K7-01	THCA	0	0	0	0	0	0	0	0	0	0	0	0	0	0	0	0	0	0	0	0	0	0
TCGA-EL-A4K9-01	THCA	0	0	0	0		0	0	0	0	0	0	0	0	0	0	0	0	0	0	0	0	-1
TCGA-EL-A4KD-01	THCA	0	0	0	0	0	0	0	0	0	0	0	0	0	0	0	0	0	0	0	0	0	0
TCGA-EL-A4KG-01	THCA	0	0	0	0	0	0	0	0	0	0	0	0	0	0	0	0	0	0	0	0	0	0
TCGA-EL-A4KH-01	THCA	0	0	0	0	0	0	0	0	0	0	0	0	0	0	0	0	0	0	0	0	0	0
TCGA-EL-A4KI-01	THCA	0	0	0	0	1	0	0	0	-1	-1	-1	0	1	1	0	0	1	1	1	1	0	-1
TCGA-EM-A1CS-01	THCA	0	0	0	0	0	0	0	0	0	0	0	0	0	0	0	0	0	0	0	0	0	-1
TCGA-EM-A1CT-01	THCA	0	0	0	0	0	0	0	0	0	0	0	0	0	0	0	0	0	0	0	0	0	0
TCGA-EM-A1CU-01	THCA	0	0	0	0	0	0	0	0	0	0	0	0	0	0	0	0	0	0	0	0	0	0
TCGA-EM-A1CV-01	THCA	0	0	0	0	0	0	0	0	0	0	0	0	0	0	0	0	0	0	0	0	0	0
TCGA-EM-A1CW-01	THCA	0	0	0	0	0	0	0	0	0	0	0	0	0	0	0	0	0	0	0	0	0	0
TCGA-EM-A1YA-01	THCA	0	0	0	0	0	0	0	0	0	0	0	0	0	0	0	0	0	0	0	0	0	0
TCGA-EM-A1YB-01	THCA	0	0	0	0	0	0	0	0		0	0	0	-1	0	0	0	0	0	0	0	0	0
TCGA-EM-A1YE-01	THCA	-1	-1		0	0		0	0	-1	0	0	0	0	0	-1	0		-1	0	0	0	0
TCGA-EM-A22I-01	THCA	0	0	0	0	0	0	0	0	0	0	0	0	0	0	0	0	0	0	0	0	0	0
TCGA-EM-A22J-01	THCA	0	0	0	0	0	0	0	0	0	0	0	0	0	0	0	0	0	0	0	0	0	0
TCGA-EM-A22K-01	THCA	0	0	0	0	0	0	0	0	0	0	0	0	0	0	0	0	0	0	0	0	0	-1
TCGA-EM-A22L-01	THCA	0	0	0	0	0	0	0	0	0	0	0	0	0	0	0	0	0	0	0	0	0	-1
TCGA-EM-A22M-01	THCA	0	0	0	0	0	0	0	0	0	0	0	0	-1	0	0	0	0	0	0	0	0	-1
TCGA-EM-A22N-01	THCA	0	-1		1	1	0	1	0	0	1	-1	1	0	1	0	1	1	0	1	0	0	1
TCGA-EM-A22O-01	THCA	0	0	0	0	0	0	0	0	0	0	0	0	0	0	0	0	0	0	0	0	0	0
TCGA-EM-A22P-01	THCA	0	0	0	0	0	0	0	0	0	0	0	0	0	0	0	0	0	0	0	0	-1	-1
TCGA-EM-A22Q-01	THCA	0	0	0	0	0	0	0	0	0	0	0	0	-1	0	0	0	0	0	0	0	0	0
TCGA-EM-A2CJ-01	THCA	0	0		0	0	0		0	0	0	0	0	0	0	0	0	0	0	0	0	0	-1
TCGA-EM-A2CK-01	THCA	0	0	0	0	0	0	0	0	0	0	0	0	0	0	0	0	0	0	0	0	0	0
TCGA-EM-A2CL-01	THCA	0	0	0	0	0	0	0	0	0	0	0	0	0	0	0	0	0	0	0	0	0	0
TCGA-EM-A2CM-01	THCA	0	0	0	0	0	0	0	0	0	0	0	0	0	0	0	0	0	0	0	0	0	-1
TCGA-EM-A2CN-01	THCA	0	0	0	0	0	0	0	0	0	0	0	0	0	0	0	0	0	0	0	0	0	0
TCGA-EM-A2CO-01	THCA	0	-1		0	0	0	0	0	0	0	0	0	0	0	0	1	1	0	0	0	0	0
TCGA-EM-A2CP-01	THCA	0	0	0	0	0	0	0	0	0	0	0	0	0	0	0	0	0	0	0	0	0	0
TCGA-EM-A2CQ-01	THCA	0	0	0	0	0	0	0	0	0	0	0	0	0	0	0	0	0	0	0	0	0	0
TCGA-EM-A2CT-01	THCA	0	0	0	0	0	0	0	0	0	0	0	0	0	0	0	0	0	0	0	0	0	0
TCGA-EM-A2OV-01	THCA	0	0	0	0	0	0	0	0	0	0	0	0	0	0	0	0	0	0	0	0	0	0
TCGA-EM-A2OW-01	THCA	0	0	0	0	0	0	0	0	0	0	0	0	0	0	0	0	0	0	0	0	0	0
TCGA-EM-A2OX-01	THCA	0	0	0	0	0	0	0	0	0	0	0	0		0	0	0	0	0	0	0	0
TCGA-EM-A2OY-01	THCA	0	-1	0	0	1	0	1	0	-1	0	0	1	1	1	-1	0	1	0	1	1	-1	-1
TCGA-EM-A2OZ-01	THCA	0	0	0	0	0	0	0	0	0	0	0	0	0	0	0	0	0	0	0	0	0	0
TCGA-EM-A2P0-01	THCA	0	0	0	0	0	0	0	0	0	0	0	0	0	0	0	0	0	0	0	0	0	0
TCGA-EM-A2P1-01	THCA	0	0	0	0	0	0	0	0	0	0	0	0	0	0	0	0	0	0	0	0	0	0
TCGA-EM-A2P1-06	THCA	0	0	0	0	0	0	0	0	0	0	0	0	0	0	0	0	0	0	0	0	0	0
TCGA-EM-A2P2-01	THCA	0	0	0	0	0	0	0		0	0		0	0	0	0	0	0	0	0	0	0	0
TCGA-EM-A2P3-01	THCA	0	0	0	0	0	0	0	0	0	0	0	0	0	0	0	0	0	0	0	0	0	0
TCGA-EM-A3AI-01	THCA	0	0	0	0	1	0	1	0	0	0	0	1	0	1	0	1	1	0	0	1	0	0
TCGA-EM-A3AJ-01	THCA	0	0	0	0	0	0	0	0	0	0	0	0	0	0	0	0	0	0	0	0	0	0
TCGA-EM-A3AK-01	THCA	0	0	0	0	0	0	0	0	0	0	0	0	0	0	0	0	0	0	0	0	0	0
TCGA-EM-A3AL-01	THCA	0	0	0	0	0	0	0	0	0	0	0	0	0	0	0	0	0	0	0	0	0	0
TCGA-EM-A3AN-01	THCA	0	0	0	0	0	0	0	0	0	0	0	0	0	0	0	0	0	0	0	0	0	0
TCGA-EM-A3AO-01	THCA	0	0	0	0	0	0	0	0	0	0	0	0	0	0	0	0	0	0	0	0	0	0
TCGA-EM-A3AP-01	THCA	0	0	0	0	0	0	0	0	0	0	0	0	0	0	0	0	0	0	0	0	0	-1
TCGA-EM-A3AR-01	THCA	0	0	0	0	0	0	0	0	0	0	0	0	0	0	0	0	0	0	0	0	0	0
TCGA-EM-A3FJ-01	THCA	0	0	0	0	0	0	0	0	0	0	0	0	0	0	0	0	0	0	0	0	0	0
TCGA-EM-A3FK-01	THCA	0	0	0	0	0	0	0	0	0	0	0	0	0	0	0	0	0	0	0	0	0	0
TCGA-EM-A3FL-01	THCA	0	0	0	0	0	0	0	0	0	0	0	0	0	0	0	0	0	0	0	0	0	0
TCGA-EM-A3FM-01	THCA	0	0	0	0	0	0	0	0	0	0	0	0	0	0	0	0	0	0	0	0	0	0
TCGA-EM-A3FN-01	THCA	0	0	0	0	0	0	0	0	0	0	0	0	0	0	0	0	0	0		0	0	0
TCGA-EM-A3FO-01	THCA	0	0	0	0	0	0	0	0	0	0	0	0	0	0	0	0	0	0	0	0	0	0
TCGA-EM-A3FP-01	THCA	0	0	0	0	0	0	0	0	0	0	0	0	0	0	0	0	0	0	0	0	0	0
TCGA-EM-A3FQ-01	THCA	0	0	0	0	0	0	0	0	0	0	0	0	0	0	0	0	0	0	0	0	0	0
TCGA-EM-A3FQ-06	THCA	0	0	0	0	0	0	0	0	0	0	0	0	0	0	0	0	0	0	0	0	0	0
TCGA-EM-A3FR-01	THCA	0	0	0	0	0	0	0	0	0	0	0	0	0	0	0	0	0	0	0	0	0	0
TCGA-EM-A3O3-01	THCA		0	0	0		0	0	0	-1	0	0	0		0	0	0	0	0	0	0	0	0
TCGA-EM-A3O6-01	THCA	0	0	0	0	0	0	0	0	0		0	0	0	0	0	0	0	0	0	0	0	0
TCGA-EM-A3O7-01	THCA	0	0	0	0	0	0	0	0	0	0	0	0	0	0	0	0	0	0	0	0	0	0
TCGA-EM-A3O8-01	THCA	0	0	0	0	0	0	0	0	0	0	0	0	0	0	0	0	0	0	0	0	0	0
TCGA-EM-A3O9-01	THCA	0	-1	0	0	0	0	1	-1	-1	-1	0	0	0	0	-1	1	-1	0	1	1	0	-1
TCGA-EM-A3OA-01	THCA	0	0	0	0	0	0	0	0	0	0	0	0	0	0	0	0	0	0	0	0	0	0
TCGA-EM-A3OB-01	THCA	0	0	0	0	0	0	0	0	0	0	0	0	0	0	0	0		0	0	0	0	0
TCGA-EM-A3ST-01	THCA	0	0	0	0	0	0	0	0	0	0	0	0	0	0	0	0	0	0	0	0	0	0
TCGA-EM-A3SU-01	THCA	0	0	0	0	0	0	0	0	0	0	0	0	0	0	0	0	0	0	0	0	0	0
TCGA-EM-A3SU-06	THCA	0	0	0	0	0	0	0	0	0	0	0	0	0	0	0	0	0	0	0	0	0	0
TCGA-EM-A3SX-01	THCA	0	0	0	0	0	0	0	0	0	0	0	0	0	0	0	0	0	0	0	0	0	-1
TCGA-EM-A3SY-01	THCA	0	-1	0	0	1	0	1	-1	-1	0	1	1	0	-1	0	1	1	-1	1	1	1	0
TCGA-EM-A3SZ-01	THCA	0	0	0	0	0	0	0	0	0	0	0	0	0	0	0	0	0	0	0	0	0	0
TCGA-EM-A4FF-01	THCA	0	0	0	0	0	0	0	0	0	0	0	0	0	0	0	0	0	0	0	0	0	0
TCGA-EM-A4FH-01	THCA	0	0	0	0	0	0	0	0	0	0	0	0	0	0	0	0	0	0	0	0	0	0
TCGA-EM-A4FK-01	THCA	0	0	0	0	0	0	0	0	0	0	0	0	0	0	0	0	0	0	0	0	0	0
TCGA-EM-A4FM-01	THCA	0	0	0	0	0	0	0	0	0	0	0	0	0	0	0	0	0	0	0	0	0	0
TCGA-EM-A4FN-01	THCA	0	0	0	0	0	0	0	0	0	0	0	0	0	0	0	0	0	0	0	0	0	0
TCGA-EM-A4FO-01	THCA	0	0	0	0	0	0	0	0	0	0	0	0	0	0	0	0	0	0	0	0	0	0
TCGA-EM-A4FQ-01	THCA	0	0	0	0	0	0	0	0	0	0	0	0	0	0	0	0	0	0	0	0	0	0
TCGA-EM-A4FR-01	THCA	0	0	0	0	0	0	0	0	0	0	0	0	0	0	0	0	0	0	0	0	0	-1
TCGA-EM-A4FU-01	THCA	0	0	0	0	0	0	0	0	0	0	0	0	0	0	0	0	0	0	0	0	0	-1
TCGA-EM-A4FV-01	THCA	0	0	0	0	0	0	0	0	0	0	0	0	0	0	0	0	0	0	0	0	0	0
TCGA-EM-A4G1-01	THCA	0	0	0	0	0	0	0	0	0	0	0	0	0	0	0	0	0	0	0	0	0	0
TCGA-ET-A25G-01	THCA	0	0	0	0	0	0	0	0	0	0	0	0	0	0	0	0	0	0	0	0	0	0
TCGA-ET-A25I-01	THCA	0	0	0	0	0	0	0	0	0	0	0	0	0	0	0	0	0	0	0	0	0	0
TCGA-ET-A25J-01	THCA	0	0	0	0	0	0	0	0	0	0	0	0	0	0	0	0	0	0	0	0	0	0
TCGA-ET-A25K-01	THCA	0	0	0	0	0	0	0	0	0	0	0	0	0	0	0	0	0	0	0	0	0	0
TCGA-ET-A25L-01	THCA	0	0	0	0	0	0	0	0	0	0	0	0	0	0	0	0	0	0	0	0	0	-1
TCGA-ET-A25O-01	THCA	0	0	0	0	0	0	0	0	0	0	0	0	0	0	0	0	0	0	0	0	0	-1
TCGA-ET-A25P-01	THCA	0	0	0	0	0	0	0	0	0	0	0	0	0	0	0	0	1	0	0	0	0	0
TCGA-ET-A25R-01	THCA	0	0	0	0	0	0	0	0	0	0	0	0	0	0	0	0	0	0	0	0	0	0
TCGA-ET-A2MX-01	THCA	0	0	0	0	0	0	0	0	0	0	0	0	0	0	0	0	0	0	0	0	0	0
TCGA-ET-A2MY-01	THCA	0	0	0	0	0	0	0	0	0	0	0	0	0	0	0	0	0	0	0	0	0	0
TCGA-ET-A2MZ-01	THCA	0	0	0	0	0	0	0	0	0	0	0	0	0	0	0	0	0	0	0	0	0	0
TCGA-ET-A2N0-01	THCA	0	0	0	0	0	0	0	0	0	0	0	0	0	0	0	0	0	0	0	0	0	0
TCGA-ET-A2N1-01	THCA	0	0	0	0	0	0	0	0	0	0	0	0	0	0	0	0	0	0	0	0	0	0
TCGA-ET-A2N3-01	THCA	0	0	0	0	0	0	0	0	0	0	0	0	0	0	0	0	0	0	0	0	0	0
TCGA-ET-A2N4-01	THCA	0	0	0	0	0	0	0	0	0	0	0	0	0	0	0		0	0	0	0	0	-1
TCGA-ET-A2N5-01	THCA	0	0	0	0	0	0	0	0	0	0	0	0	0	0	0	0	0	0	0	0	0	0
TCGA-ET-A39I-01	THCA	0	0	0	0	0	0	0	0	0	0	0	0	0	0	0	0	0	0	0	0	0	0
TCGA-ET-A39J-01	THCA	0	0	0	0	0	0	0	0	0	0	0	0	0	0	0	0	0	0	0	0	0	0
TCGA-ET-A39K-01	THCA	0	0	0	0	0	0	0	0	0	0	0	0	0	0	0	0	0	0	0	0	0	0
TCGA-ET-A39L-01	THCA	0	0	0	0	0	0	0	0	0	0	0	0	0	0	0	0	0	0	0	0	0	0
TCGA-ET-A39M-01	THCA	0	0	0	0	0	0	0	0	0	0	0	0	0	0	0	0	0	0	0	0	0	-1
TCGA-ET-A39N-01	THCA	-1		-1	-1	0	-1	1	0	-1	-1	0	0	-1	0	-1	1	0	0		0	0	-1
TCGA-ET-A39O-01	THCA	0	0	0	0	0	0	0	0	0	0	0	0	0	0	0	0	0	0	0	0	0	0
TCGA-ET-A39P-01	THCA		0	0	0	0	0	0	0	0	0	0	0	0	0	0	0	0	0	0	0	0	0
TCGA-ET-A39R-01	THCA	0	0	0	0	0	0	0	0	0	0	0	0	0	0	0	0	0	0	0	0	0	0
TCGA-ET-A39S-01	THCA	0	0	0	0	0	0	0	0	0	0	0	0	0	0	0	0	0	0	0	0	0	0
TCGA-ET-A39T-01	THCA	0	0	0	0	0	0	0	0	0	0	0	0	0	0	0	0	0	0	0	0	0	0
TCGA-ET-A3BN-01	THCA	0	0	0	0	0	0	0	0	0	0	0	0	0	0	0	0	0	0	0	0	0	0
TCGA-ET-A3BO-01	THCA	0	0	0	0	0	0	0	0	0	0	0	0	0	0	0	0	0	0	0	0	0	0
TCGA-ET-A3BP-01	THCA	0	0	0	0	0	0	0	0	0	0	0	0	0	0	0	0	0	-1	0	0	0	-1
TCGA-ET-A3BQ-01	THCA	0	0	0	0	0	0	0	0	0	0	0	0	0	0	0	0	0	0	0	0	0	0
TCGA-ET-A3BS-01	THCA	0	0	0	0	0	0	0	0	0	0	0	0	0	0	0	0	0	0	0	0	0	0
TCGA-ET-A3BT-01	THCA	0	0	0	0	0	0	0	0	0	0	0	0	0	0	0	0	0	0	0	0	0	0
TCGA-ET-A3BU-01	THCA	0	0	0	0	0	0	0	0	0	0	0	0	0	0	0	0	0	0	0	0	0	0
TCGA-ET-A3BV-01	THCA	0	0	0	0	0	0	0	0	0	0	0	0	0	0	0	0	0	0	0	0	0	0
TCGA-ET-A3BW-01	THCA	0	0	0	0	0	0	0	0	0	0	0	0	0	0	0	0	0	0	0	0	0	0
TCGA-ET-A3BX-01	THCA	0	0	0	0	0	0	0	0	0	0	0	0	0	0	0	0	0	0	0	0	0	0
TCGA-ET-A3DO-01	THCA	0	0	0	0	0	0	0	0	0	0	0	0	0	0	0	0	0	0	0	0	0	0
TCGA-ET-A3DP-01	THCA	0	0	0	0	0	0	0	0	0	0	0	0	0	0	0	0	0	0	0	0	0	0
TCGA-ET-A3DQ-01	THCA	0	0	0	0	0	0	0	0	0		0	0	0	0	0	0	0	0	0	0	0	0
TCGA-ET-A3DR-01	THCA	0	0	0	0	0	0	0	0	0	0	0	0	0	0	0	0	0	0	0	0	0	0
TCGA-ET-A3DS-01	THCA	0		0	0	0	0	0	0	0		0		0	0	0			0	0	0	0	-1
TCGA-ET-A3DT-01	THCA	0	0	0	0	0	0	0	0	0	0	0	0	0	0	0	0	0	0	0	0	0	0
TCGA-ET-A3DU-01	THCA	0	0	0	0	0	0	0	0	0	0	0	0	0	0	0	0	0	0	0	0	0	0
TCGA-ET-A3DV-01	THCA	0	0	0	0	0	0	0	0	0	0	0	0	0	0	0	0	0	0	0	0	0	0
TCGA-ET-A3DW-01	THCA	0	0	0	0	0	0	0	0	0	0	0	0	0	0	0	0	0	0	0	0	0	0
TCGA-ET-A40P-01	THCA	0	0	0	0	0	0	0	0	0	0	0	0	0	0	0	0	0	0	0	0	0	-1
TCGA-ET-A40Q-01	THCA	0	0	0	0	0	0	0	0	0	0	0	0	0	0	0	0	0	0	0	0	0	0
TCGA-ET-A40S-01	THCA	0	0	0	0	0	0	0	0	0	0	0	0	-1	0	0	0	0	0	0	0	0	0
TCGA-ET-A40T-01	THCA	0	0	0	0	0	0	0	0	0	0	0	0	0	0	0	0	0	0	0	0	0	-1
TCGA-ET-A4KN-01	THCA	0	0	0	0	0	0	0	0	0	0	0	0	0	0	0	0	0	0	0	0	0	0
TCGA-ET-A4KQ-01	THCA	0	0	0	0	0	0	0	0	0	0	0	0	0	0	0	0	0	0	0	0	0	0
TCGA-FE-A22Z-01	THCA	0	0	0			0	0	0	0	0	0	0	0	0	0	0		0	0	0	0	0
TCGA-FE-A230-01	THCA	0	0	0	0	0	0	0	0	0	0	0	0	0	0	0	0	0	0	0	0	0	0
TCGA-FE-A231-01	THCA		0	0	0	0	0	0	0		0	0	0	0	0	0	0	0	0	0	0	0	0
TCGA-FE-A232-01	THCA	0	0	0	0	0	0	0	0	0	0	0	0	0	0	0	0	0	0	0	0	0	0
TCGA-FE-A233-01	THCA	0	0	0	0	0	0	0	0	0	0	0	0	0	0	0	0	0	0	0	0	0	0
TCGA-FE-A234-01	THCA	0	0	0	0	0	0	0	0	0	0	0	0	0	0	0	0	0	0	0	0	0	0
TCGA-FE-A235-01	THCA	0	0	0	0	0	0	0	0	0	0	0	0		0	0	0	0	0	0	0	0	0
TCGA-FE-A236-01	THCA	0	0	0	0	0	0	0	0	0	0	0	0	0	0	0	0	0	0	0	0	0	0
TCGA-FE-A237-01	THCA	0	0	0	0	0	0	0	0	0	0	0	0	0	0	0	0	0	0	0	0	0	0
TCGA-FE-A23A-01	THCA	0	0	0	0	0	0	0	0	0	0	0	0	0	0	0	0	0	0	0	0	0	0
TCGA-FE-A3PA-01	THCA	0	0	0	0	0	0	0	0	0	0	0	0	0	0	0	0	0	0	0	0	0	0
TCGA-FE-A3PB-01	THCA	0	0	0	0	0	0	0	0	0	0	0	0	0	0	0	0	0	0	0	0	0	0
TCGA-FE-A3PC-01	THCA	0	0	0	0	0	0	0	0	0	0	0	0	0	0	0	0	0	0	0	0	0	0
TCGA-FE-A3PD-01	THCA	0	0	0	0	0	0	0	0	0	0	0	0	0	0	0	0	0	0	0	0	0	0
TCGA-FK-A3S3-01	THCA	0	0	0	0	0	0	0	0	0	0	0	0	0	0	0	0	0	0	0	0	0	0
TCGA-FK-A3SB-01	THCA	0	0	0	0	0	0	0	0	0	0	0	0	0	0	0	0	0	0	0	0	0	0
TCGA-FK-A3SD-01	THCA	0	0	0	0	0	0	0	0	0	0	0	0	0	0	0	0	0	0	0	0	0	0
TCGA-FK-A3SE-01	THCA	0	0	0	0	0	0	0	0	0	0	0	0	0	0	0	0	0	0	0	0	0	0
TCGA-FK-A3SG-01	THCA	0	0	0	0	0	0	0	0		0	0	0	0	0	0	0	0	0	0	0	0	0
TCGA-FK-A3SH-01	THCA	0	0	0	0	0	0	0	0	0	0	0	0	0	0	0	0	0	0	0	0	0	0
TCGA-FK-A4UB-01	THCA	0	0	0	0	0	0	0	0	0	0	0	0	0	0	0	0	0	0	0	0	0	0
TCGA-FY-A2QD-01	THCA	0	0	0	0	0	0	0	0	0	0	0	0	0	0	0	0	0	0		0	0	0
TCGA-FY-A3BL-01	THCA	0	0	0	0	0	0	0	0	0	0	0	0	0	0	0	0	0	0	0	0	0	0
TCGA-FY-A3I4-01	THCA	0	0	0	0	0	0	0	0	0	0	0	0	0	0	0	0	0	0	0	0	0	0
TCGA-FY-A3I5-01	THCA	-1	-1	-1	0	0	-1	1	0	0	-1	-1	0	-1	0	-1	0	0	0	0	0	-1	0
TCGA-FY-A3NM-01	THCA	1	0	0	1	1	0	1	0	0	0	0	1	0	1	0	1	0	0	0	0	0	0
TCGA-FY-A3NN-01	THCA	0	0	0	0	0	0	0	0	0	0	0	0	0	0	0	0	0	0	0	0	0	0
TCGA-FY-A3ON-01	THCA	0	0	0	0	0	0	0	0	0	0	0	0	0	0	0	0	0	0	0	0	0	0
TCGA-FY-A3R6-01	THCA	0	0	0	0	0	0	0	0	0	0	0	0	0	0	0	0	0	0	0	0	0	0
TCGA-FY-A3R7-01	THCA	0	0	0	0	0	0	0	0	0	0	0	0	0	0	0	0	0	0	0	0	0	-1
TCGA-FY-A3R8-01	THCA	0	0	0	0	0	0	0	0	0	0	0	0	0	0	0	0	0	0	0	0	0	0
TCGA-FY-A3R9-01	THCA	0	0	0	0	0	0	0	0	0	0	0	0	0	0	0	0	0	0	0	0	0	0
TCGA-FY-A3RA-01	THCA	0	0	0	0	0	0	0	0	0	0	0	0	0	0	0	0	0	0	0	0	0	0
TCGA-FY-A3TY-01	THCA	0	0	0	0	0	0	0	0	0	0	0	0	0	0	0	0	0	0	0	0	0	0
TCGA-FY-A3W9-01	THCA	0	0	0	0	0	0	0	0		0	0	0	-1	0	0	0	0	0	0	0	0	-1
TCGA-FY-A3WA-01	THCA	0	0	0	0	0	0	0	0	0	0	0		0	0	0	0	0	0		0	0	-1
TCGA-FY-A3YR-01	THCA	0	0	0	0	0	0	0	0	0	0	0	0	0	0	0	0	0	0	0	0	0	0
TCGA-FY-A40K-01	THCA	0	0	0	0	0	0	0	0	0	0	0	0	0	0	0	0	0	0	0	0	0	0
TCGA-FY-A40L-01	THCA		0	0	0	0	0	0	0	0	0	0	0	0	0	0	0	0	0	0	0	0	0
TCGA-FY-A40M-01	THCA	0	0	0	0	0	0	0	0	0	0	0	0	0	0	0	0	0	0	0	0	0	0
TCGA-FY-A40N-01	THCA	0	0	0	0	0	0	0	0	0	0	0	0	0	0	0	0	0	0	0	0	0	0
TCGA-FY-A4B0-01	THCA		0	0	0	0	0	0	0	0	0	0	0	-1	0	0	0	0	0		0	0	0
TCGA-FY-A4B3-01	THCA	0	0	0	0	0	0	0	0	0	0	0	0	0	0	0	0	0	0	0	0	0	0
TCGA-FY-A4B4-01	THCA	0	0	0	0	0	0	0	0	0	0	0	0	0	0	0	0	0	0	0	0	0	0
TCGA-FY-A76V-01	THCA	0	0	0	0	0	0	0	0	0	0	0	0	0	0	0	0	0	0	0	0	0	0
TCGA-GE-A2C6-01	THCA	0	0	0	0	0	0	0	0	0	0	0	0	0	0	0	0	0	0	0	0	0	-1
TCGA-H2-A26U-01	THCA		0	0	0	0	0	0	0	0	0	0	0	0	0	0	0	0	0	0	0	0	0
TCGA-H2-A2K9-01	THCA	0	0	0	0	0	0	0	0	0	0	0	0	0	0	0	0	0	0	0	0	0	0
TCGA-H2-A3RH-01	THCA	0	0	0	0	0	0	0	0	0	0	0	0	0	0	0	0	0	0	0	0	0	0
TCGA-H2-A3RI-01	THCA	0	0	0	0	0	0	0	0	0	0	0	0	0	0	0	0	0	0	0	0	0	0
TCGA-H2-A421-01	THCA	0	0	0	0	0	0	0	0	0	0	0	0	0	0	0	0	0	0	0	0	0	0
TCGA-H2-A422-01	THCA	0	0	0	0	0	0	0	0	0	0	0	0	0	0	0	0	0	0	0	0	0	0
TCGA-IM-A3EB-01	THCA		0	0	0	0	0	0	0	0	0	0	0	0	0	0	0	0	0	0	0	0	0
TCGA-IM-A3ED-01	THCA	0	0	0	0	0	0	0	0	0	0	0	0	0	0	0	0	0	0	0	0	0	0
TCGA-IM-A3U2-01	THCA	0	0	0	0	0	0	0	0	0	0	0	0	0	0	0	0	0	0	0	0	0	0
TCGA-IM-A3U3-01	THCA	0	0	0	0	0	0	0	0	0	0	0	0	0	0	0	0	0	0	0	0	0	0
TCGA-IM-A41Y-01	THCA	0	0	0	0	0	0	0	0	0	0	0	0	0	0	0	0	0	0	0	0	0	0
TCGA-IM-A41Z-01	THCA	0	0	0	0	0	0	0	0	0	0	0	0	0	0	0	0	0	0	0	0	0	0
TCGA-IM-A420-01	THCA	0	0	0	0	0	0	0	0	0	0	0	0	0	0	0	0	0	0	0	0	0	0
TCGA-IM-A4EB-01	THCA	0	0	0	0	0	0	0	0	0	0	0	0	0	0	0	0	0	0	0	0	0	0
TCGA-J8-A3NZ-01	THCA	0	0	0	0	0	0	0	0	0	0	0	0	0	0	0	0	0	0	0	0	0	0
TCGA-J8-A3O0-01	THCA	0	0	0	0	0	0	0	0	0	0	0	0	0	0	0	0	0	0	0	0	0	-1
TCGA-J8-A3O1-01	THCA		0	0	0	0	0	0	0	0	0	0	0	0	0	0	0	0	0	0	0	0	0
TCGA-J8-A3O2-01	THCA	0	0	0	0	0	0	0	0	0	0	0	0	0	0	0	0	0	0	0	0	0	0
TCGA-J8-A3O2-06	THCA	0	0	0	0	0	0	0	0	0	0	0	0	0	0	0	0	0	0	0	0	0	0
TCGA-J8-A3YD-01	THCA	0	0	0	0	0	0	0	0	0	0	0	0	0	0	0	0	0	0	0	0	0	-1
TCGA-J8-A3YE-01	THCA	0	0	0	0	0	0	0	0	0	0	0	0	0	0	0	0	0	0	0	0	0	0
TCGA-J8-A3YF-01	THCA	0	0	0	0	0	0	0	0	0	0	0	0	0	0	0	0	0	0	0	0	0	0
TCGA-J8-A3YG-01	THCA	0	0	0	0	0	0	0	0	0	0	0	0	0	0	0	0	0	0	0	0	0	0
TCGA-J8-A3YH-01	THCA	0	0	0	0	0	0	0	0	0	0	0	0	0	0	0	0	0	0	0	0	0	0
TCGA-J8-A3YH-06	THCA	0	0	0	0	0	0	0	0	0	0	0	0	0	0	0	0	0	0	0	0	0	0
TCGA-J8-A42S-01	THCA	0	0	0	0	0	0	0	0	0	0	0	0	0	0	0	0	0	0	0	0	0	0
TCGA-J8-A4HW-01	THCA	0	0	0	0	0	0	0	0	0	0	0	0	0	0	0	0	0	0	0	0	-1	0
TCGA-J8-A4HW-06	THCA	0	0	0	0	0	0	0	0	0	0	0	0	0	0	0	0	0	0	0	0	0	0
TCGA-J8-A4HY-01	THCA	0	0	0	0	0	0	0	0	0	0	0	0	0	0	0	0	0	0	0	0	0	0
TCGA-KS-A41F-01	THCA	0	0	0	0	0	0	0	0	0	0	0	0	0	0	0	0	0	0	0	0	0	0
TCGA-KS-A41I-01	THCA	0	0	0	0	0	0	0	0	0	0	0	0	0	0	0	0	0	0	0	0	0	-1
TCGA-KS-A41J-01	THCA	0	0	0	0	0	0	0	0	0	0	0	0	0	0	0	0	0	0	0	0	0	0
TCGA-KS-A41L-01	THCA	0	0	0	0	0	0	0	0	0	0	0	0	0	0	0	0	0	0	0	0	0	0
TCGA-KS-A4I1-01	THCA	0	0	0	0	0	0	0	0	0	0	0	0	0	0	0	0	0	0	0	0	0	0
TCGA-KS-A4I3-01	THCA	0	0	0	0	0	0	0	0	0	0	0	0	0	0	0	0	0	0	0	0	0	0
TCGA-KS-A4I5-01	THCA	0	0	0	0	0	0	0	0	0	0	0	0	0	0	0	0	0	0	0	0	0	0
TCGA-KS-A4I7-01	THCA	0	0	0	0	0	0	0	0	0	0	0	0	0	0	0	0	0	0	0	0	0	-1
TCGA-KS-A4I9-01	THCA	0	0	0	0	0	0	0	0	0	0	0	0	0	0	0	0	0	0	0	0	0	0
TCGA-KS-A4IB-01	THCA		0	0	0	0	0	0	0	0	0	0	0	0	0	0	0	0	0	0	0	0	-1
TCGA-KS-A4IC-01	THCA	0	0	0	0	0	0	0	0	0	0	0	0	0	0	0	0	0	0	0	0	0	0
TCGA-KS-A4ID-01	THCA	0	0	0	0	0	0	0	0	0	0	0	0	0	0	0	0	0	0	0	0	0	0
TCGA-L6-A4EP-01	THCA	0	0	0	0	0	0	0	0	0	0	0	0	0	0	0	0	0	0	0	0	0	0
TCGA-L6-A4EQ-01	THCA	0	0	0	0	0	0	0	0	0	0	0	0	0	0	0	0	0	0	0	0	0	0
TCGA-L6-A4ET-01	THCA	0	0	0	0	0	0	0	0	0	0	0	0	0	0	0	0	0	0	0	0	0	0
TCGA-L6-A4EU-01	THCA		0	0	0		0	0	0	0	0	0	0	0	0	0	0	0	0	0	0	0	0
TCGA-MK-A4N6-01	THCA	0	0	0	0	0	0	0	0	0	0	0	0	0	0	0	0	0	0	0	0	0	0
TCGA-MK-A4N7-01	THCA	0	0	0	0	0	0	0	0	0	0	0	0	0	0	0	0	0	0	0	0	0	0
TCGA-MK-A4N9-01	THCA	0	0	0	0	0	0	0	0	0	0	0	0	0	0	0	0	0	0	0	0	0	0
TCGA-MK-A84Z-01	THCA	0	0	0	0	0	0	0	0	0	0	0	0	0	0	0	0	0	0	0	0	0	-1
TCGA-QD-A8IV-01	THCA	0	0	0	0	0	0	0	0	0	0	0	0	0	0	0	0	0	0	0	0	0	-1
TCGA-FA-8693-01	DLBC	0	0	0	0	0	0	0	0	0	0	0	0	0	0		0	0	0	0	0	0	0
TCGA-FA-A4BB-01	DLBC		0	0	0	0			0	0	0		0	0	0	0	0	0	0	0	0	1	0
TCGA-FA-A4XK-01	DLBC	0	0	0	0			1	0	0	0			0	0	0	1	0		0	0	0	0
TCGA-FA-A6HN-01	DLBC		0	0	0	0		0	0	0	0	0	0	0	0	0	0	0	0	0	0	0	0
TCGA-FA-A6HO-01	DLBC			1				1	-1		1	-1	-1	1	0	-1			1	0		-1	-1
TCGA-FA-A7DS-01	DLBC	0	0	0	0	0	0	0	0	0	0			0	0	0	0	0	1		0	0	0
TCGA-FA-A7Q1-01	DLBC		0		0	1	0	0		0	0	0	1	0	0	0		1	0	0	0	0
TCGA-FA-A82F-01	DLBC	-1		0	-1	-1		0	-1	-1	0	0	-1	-1	-1	1			1		0	0	-1
TCGA-FA-A86F-01	DLBC		0	0	0		0	0		0	0	0	0	0	0	0	0	0	0		0	0	0
TCGA-FF-8041-01	DLBC	0		0	0	1	0	0	1	1	0		1	0	0	0	0	1	0		1	1	0
TCGA-FF-8042-01	DLBC	0	0	1	0					0			0	0		1	0	0	1	0	0	0	0
TCGA-FF-8043-01	DLBC			0		0	0	0		0	0				0	-1			1	0		1	-1
TCGA-FF-8046-01	DLBC	0	0	0	0	0	0	0	0	0	0	0	0	1	0	1	0	0	0	0	0	0	0
TCGA-FF-8047-01	DLBC		0			0	0	0		0	0	0	0	0	0	0		0		0	0	0	0
TCGA-FF-8061-01	DLBC	0	0	0	0	0	0	0	0	0	0	0	0	0	0	0	0	0	0	0	0	0	0
TCGA-FF-8062-01	DLBC	0	0	0	0	0	0	0	0	0	0	0	0	0	0	0	0	0	0	0	0	0	0
TCGA-FF-A7CQ-01	DLBC	0	0		0	0		0		1	0	0	0	0	0	0	0	0	1	0	0	0	0
TCGA-FF-A7CR-01	DLBC	0	0	0	0	0		0	0	0		0		0	0	0		0			0	0	0
TCGA-FF-A7CW-01	DLBC		0	1	0	0		1	0	1	0	0	0	0	0	0	0	0	1	0	0	0	0
TCGA-FF-A7CX-01	DLBC	0	0	0	0	0		0	0	0	0	0	0	0	0	0	0	0		0	0	0	0
TCGA-FM-8000-01	DLBC		0	0	0	0	0		0	0	0	0	0	0	0	0	1	0	0	0	0	0	0
TCGA-G8-6325-01	DLBC		0		0	0		0	0		0	0	0	0	0	0	0	0		0	0	0	0
TCGA-G8-6326-01	DLBC	0	0	0	0	0	0	0	0	0	0	0	0	0	0	0	0	0	0	0	0	0	0
TCGA-G8-6906-01	DLBC	0	0	0	0	0		0	0	0	0	0	0	0	0	0	0	0	0	0	0	0	0
TCGA-G8-6907-01	DLBC	0	0	0	0	0	0	0	0	0		0	0		0	0	0	0	0	0	0	0	0
TCGA-G8-6909-01	DLBC	0		0	0			0	0	0	0		0	0	0	1		0	0	0	0	1	0
TCGA-G8-6914-01	DLBC		0	1	0	0	0		0	0	0	0	0	0	0	0	0	0	1	0	0	0	0
TCGA-GR-7351-01	DLBC	0		0	0	0	0		0	0	0		0		0	0	0	0	0	0	0	1	0
TCGA-GR-7353-01	DLBC		0	0		0	0		1	0	-1		0	0		-1	0	0	0	0	0	1	0
TCGA-GR-A4D4-01	DLBC	0	0		0	0	0	1	0	0		0		-1	0	-1			0		0	0	0
TCGA-GR-A4D5-01	DLBC	0	0	0	0	0		0	0	0	0	1	1	0	0	0	0	0	0	0	0	0	0
TCGA-GR-A4D6-01	DLBC		0	1		0	0	1			0	0	0	0	0	-1	0	0	1	0	0	0	0
TCGA-GR-A4D9-01	DLBC		0	0	0	0		0	0	0	0	1	0	0	0	0	0	0	0	0	0	0	0
TCGA-GS-A9TQ-01	DLBC			-1	-1	0				-1	1	1	0	1	0	-1	0			0	0	0
TCGA-GS-A9TT-01	DLBC	0	0	0	0	0		0	0	0		0		0	0	0	0	0	1		0	0	0
TCGA-GS-A9TU-01	DLBC	0	0		0		0	1	0	0	0	0	0	0	0	0	0	0			0	0	0
TCGA-GS-A9TV-01	DLBC	0	0	0	0	0	0	0	0	0	0	0	0	0	0	0	0	0	0	0	0	0	0
TCGA-GS-A9TW-01	DLBC	0	0		0	1		-1		1	0			0	0	0	0		1	0		1	0
TCGA-GS-A9TX-01	DLBC	0		1	0		0		1		0	0		0	0	0	0		0	0	0	0	0
TCGA-GS-A9TY-01	DLBC					1					-1				0	0						1	-1
TCGA-GS-A9TZ-01	DLBC	0		-1	0	1	0	0		1	0	0	1	-1	-1	0			0	0	0	0	0
TCGA-GS-A9U3-01	DLBC		0	1	0		0			0	0	0	0		0	0	0	0	1	0	0	0	0
TCGA-GS-A9U4-01	DLBC	0	0	0	0	0		-1	1	0	0	1	0	1	0	0	0	0	0	0	1	1	0
TCGA-RQ-A68N-01	DLBC	-1		1	0	0		0	-1	0	0	1		0		0	1		0		0	0	0
TCGA-RQ-A6JB-01	DLBC	0	0	0	0	0	0	0	0	0	0	0	0	0	0	0	0	0	0	0	0	0	0
TCGA-RQ-AAAT-01	DLBC			-1	0	-1			0	0	0	1		-1	-1	0	0			0	0	0	0
TCGA-VB-A8QN-01	DLBC		0	0	0	0		0			0		0		0	0		0	0		0	0	0
TCGA-3G-AB0O-01	THYM	0	0	0	0	0	0	0	0	0	0	0	0	0	0	0	0	0	0	0	0	0	0
TCGA-3G-AB0Q-01	THYM	0		0	0	0	0	0	0	0	0	0	0	0	0	0	0	0	0	0	0	0	0
TCGA-3G-AB0T-01	THYM		0	0	0	0	0	0	0	0	0	0	0	0	0	0	0	0	0	0	0	0	0
TCGA-3G-AB14-01	THYM	0	0		0	0	-1	0	0	0	0	0	0	0	0	0	0	0	0	0	0	0	0
TCGA-3G-AB19-01	THYM	0	0	0	0	0	0	0	0	0	0	0	0	0	0	0	0	0	0	0	0	0	-1
TCGA-3Q-A9WF-01	THYM	0	0	0	0	0	0	0	0	0	0	0	0	0	0	0	0	0	0	0	0	0	0
TCGA-3S-A8YW-01	THYM		0	-1	0		-1			-1	0	0	1	-1	0	0			1	-1	0	0	-1
TCGA-4V-A9QI-01	THYM	0	0	0	0	0	0	0	0	0	0	0	0	0	0	0	0	0	0	0	0	0	0
TCGA-4V-A9QJ-01	THYM	0	0		0	0	0	0	0	0	0	0	0	0	0	0	0		0		0	0	0
TCGA-4V-A9QL-01	THYM	0	0	0	0	0	0	0	0	0	0	0	0	0	0	0	0	0	0	0	0	0	0
TCGA-4V-A9QM-01	THYM	0	0	0	0	0	0	0	0	0		0	0	0	0	0	0	0	0	0	0	0	0
TCGA-4V-A9QN-01	THYM		0		0	1	-1	0	0	0		-1	0	0	0	0	0	0	0	0	0	0	-1
TCGA-4V-A9QR-01	THYM		0	0	0	1	-1	1	0	1	1	0	0	0	1	1	1	0	0	1	1	-1	1
TCGA-4V-A9QS-01	THYM		-1	-1			-1	1	-1		-1	-1	-1	-1	0		-1	-1	-1	-1		-1	-1
TCGA-4V-A9QT-01	THYM	0	0	0	0	0	0	0	0	0	0	0	0	0	0	0	0	0	0	0	0	0	0
TCGA-4V-A9QU-01	THYM	0	0	0	0	0	0	0	0	0	0	0	0	0	0	0	0	0	0	0	0	0	0
TCGA-4V-A9QW-01	THYM	0	0	0	0	0	0	0	0	0	0	0	0	0	0	0	0	0	0	0	0	0	0
TCGA-4V-A9QX-01	THYM	0	0	0	0	0	0	0	0	0	0	0	0		0	0	0	0	0	0	0	0	-1
TCGA-4X-A9FA-01	THYM	0	0	0	0	0	0	0	0	0	0	0	0	0	0	0	0	0	0	0	0	0	0
TCGA-4X-A9FD-01	THYM		0			0	-1	1	0	0	0	-1	-1	-1	1	-1		-1	-1	0	0	-1	1
TCGA-5G-A9ZZ-01	THYM		0	0	0	0	-1	0	0	0	0	0	0	0	0	0			0	0	0	0	0
TCGA-5K-AAAP-01	THYM	0	0	0	0	0	0	0	0	0	0	0	0	0	0	0	0	0	0	0	0	0
TCGA-5U-AB0D-01	THYM			0	0		-1	0	0							-1			-1	-1	1	-1	-1
TCGA-5U-AB0E-01	THYM	0	0	-1	0	0	-1	1			0	-1	-1	-1		1	1		-1	0	1	-1	0
TCGA-5U-AB0F-01	THYM	0	0	0	0	0		0	0	0	0	0	0	0	0	0	0	0	0	0	0	0	-1
TCGA-5V-A9RR-01	THYM	0	0	0	0	0	0	0	0	0	0	0	0		0	0	0	0	0	0	0	0	0
TCGA-X7-A8D6-01	THYM	0	0	0	0	0	0	0	0	0	0	0	0	0	0	0	0	0	0	0	0	0	0
TCGA-X7-A8D7-01	THYM	0	0	0	0	0	0	0	0	0	0	0	0	0	0	0	0	0	0	0	0	0	0
TCGA-X7-A8D8-01	THYM	0	0	0	0	0	0	0	0	0	0	0	0	0	0	0	0	0	0	0	0	0	0
TCGA-X7-A8D9-01	THYM	0	0	0	0	0	0	0	0	0	0	0	0	-1	0	0	0	0	0	0	0	0	0
TCGA-X7-A8DB-01	THYM	0	0	0	0	0	0	0	0	0	0	0	0	0	0	0	0	0	0	0	0	0	0
TCGA-X7-A8DC-01	THYM	0	0	0	0	0	0	0	0	0	0	0	0	0	0	0	0	0	0	0	0	0	0
TCGA-X7-A8DI-01	THYM	0	0	0	0	0	0	0	0	0	0	0	0	0	0	0	0	0	0	0	0	0	0
TCGA-X7-A8DJ-01	THYM	0	0	0	0	0	0	0	0	0	0	0	0	0	0	0	0	0	0	0	0	0	0
TCGA-X7-A8M0-01	THYM	0	0	0	0	0			0	0		0	0	0	0	0	0	0	0	0	0	0	0
TCGA-X7-A8M1-01	THYM	0	0	0	0	0	0	0	0	0	0	0	0	0	0	0	0	0	0	0	0	0	0
TCGA-X7-A8M3-01	THYM		-1		-1	1	-1	1	1	-1	-1	-1	-1	-1	1	-1	-1	-1	-1	1	1	1	1
TCGA-X7-A8M5-01	THYM	0	0	0	0	0	0	0	0	0	0	0	0	0	0	0	0	0	0	0	0	0	0
TCGA-X7-A8M6-01	THYM	0	0	0	0	0	0	0	0	0	0	0	0	0	0	0	0	0	0	0	0	0	0
TCGA-X7-A8M7-01	THYM	0	0	0	0	0	0	0	0	0	0	0	0	0	0	0	0	0	0	0	0	0	0
TCGA-X7-A8M8-01	THYM	0	0	0	0	0	0	0	0	0	0	0	0	0	0	0	0	0	0	0	0	0	0
TCGA-XM-A8R8-01	THYM	0	0	0	0	0	0	0	0	0	0	0	0	0	0	0	0	0	0	0	0	0	0
TCGA-XM-A8R9-01	THYM	0	0	0	0	0	0	0	0	0	0	0	0	0	0	0	0	0	0	0	0	0	0
TCGA-XM-A8RB-01	THYM	0	0	0	0	0	0	0	0	0	0	0	0	0	0	0	0	0	0	0	0	0	0
TCGA-XM-A8RC-01	THYM			-1	-1	1	-1	1	1	-1		-1	1	-1	1	1	-1	1		0	1	0	-1
TCGA-XM-A8RF-01	THYM	0	0	0	0	0	0	0	0		0	0	0	0	0	1	0	0	0	0	0	0
TCGA-XM-A8RG-01	THYM	0	0	0	0	0	0	0	0	0	-1	0	0	0	0	0	0		0	0	0	0	0
TCGA-XM-A8RL-01	THYM	0	0	0	0	0	0	0	0	0	0	0	0	0	0	0	0	0	0	0	0	0	0
TCGA-XM-AAZ1-01	THYM		0	0	0	0	0	0	0	0	0	0	0	0	0	0	0	0	0	0	0	0	0
TCGA-XM-AAZ2-01	THYM	0	0	0	0	0	0	0	0	0	0	0	0	0	0	0	0	0	0	0	0	0	0
TCGA-XM-AAZ3-01	THYM	0	0	0	0	0	0	0	0	0	0	0	0	0	0	0	0	0	0	0	0	0	0
TCGA-XU-A92O-01	THYM	0	0	0	0	0	0	0	0	0	0	0	0	0	0	0	0	0	0	0	0	0	0
TCGA-XU-A92Q-01	THYM	0	0	0	0	0	0	0	0	0	0	0	0	0	0	0	0	0	0	0	0	0	0
TCGA-XU-A92R-01	THYM	0	0	0	0	0	0	0	0		0	0	0	0	0	0	0	0	0	0	0	0	0
TCGA-XU-A92T-01	THYM	0	0	0	0	0	0	0	0	0	0	0	0	0	0	0	0	0	0	0	0	0	0
TCGA-XU-A92U-01	THYM	0	0	0	0	0	0	0	0	0	0	0	0	0	0	0	0	0	0	0	0	0	0
TCGA-XU-A92V-01	THYM	0	0	0	0	0	0	0	0	0	0	0	0	0	0	0	0	0	0	0	0	0	0
TCGA-XU-A92W-01	THYM	0	0	0	0	0	0	0	0	0	0	0	0	0	0	0	0	0	0	0	0	0	0
TCGA-XU-A92X-01	THYM	0	0	-1	0	0	-1	1	-1	1	0	-1	-1	-1	1	1	0	-1	0	0	1	-1	1
TCGA-XU-A92Y-01	THYM		0	0	0	1	0	1	0	0	0	0	0	0	0	1	0	0	0	0	0	0	0
TCGA-XU-A92Z-01	THYM	0	0	0	0	0		0	0	0	0	0	0	0	0	0	0	0	0	0	0	0
TCGA-XU-A930-01	THYM		0	-1	-1	0	-1	1	0	1		-1	-1	-1	0	0	-1	0	-1	1	0	-1	0
TCGA-XU-A931-01	THYM		0	0	0	1	-1	1	0	1	0	0	0	0	1		0	0	-1	0	0	0	0
TCGA-XU-A932-01	THYM		0	0	0	0		0			0	0	0		0	0	0		0	0	0	0	0
TCGA-XU-A933-01	THYM		0	0	1	0	0	0	0	0	1	0	0	0	0	0			0	0	1	0	0
TCGA-XU-A936-01	THYM		0	0	0	1	-1	0	1	0		1	1	0	0	1		1	1	0	1	1	0
TCGA-XU-AAXW-01	THYM	0	0	0	0	0	0	0	0	0	0	0	0	0	0	0	0	0	0	0	0	0	0
TCGA-XU-AAXX-01	THYM		0	0	0	0	0	0	0	0	0	0	0	0	0	0	0	0	0	0	0	0	0
TCGA-XU-AAXY-01	THYM	0	0	0	0	0	0	0	0	0	0	0	0	0	0	0	0	0	0	0	0	0	0
TCGA-XU-AAXZ-01	THYM	0	0	0	0	0	0	0	0	0	0	0	0	0	0	0	0	0	0	0	0	0	0
TCGA-XU-AAY0-01	THYM	0	0	0	0	0	0	0	0	0	0	0	0	0	0	0	0	0	0	0	0	0	0
TCGA-XU-AAY1-01	THYM	0	0	0	0	0	0	0	0	0	0	0	0	0	0	0	0	0	0	0	0	0	0
TCGA-YT-A95D-01	THYM	0	0	0	0	0	0	0	0	0	0	0	0	-1	0	0	0	0	0	0	0	0	0
TCGA-YT-A95E-01	THYM	0	0	0	0	0	0	0	0	0	0	0	0	0	0	0	0	0	0	0	0	0	0
TCGA-YT-A95G-01	THYM		0	0	0	0	0	0		0	0	0	0	0	0	0	0	0	0	0	0	0	0
TCGA-YT-A95H-01	THYM	0	0	0	0	0	0	0	0	0	0	0	0	0	0	0	0	0	0	0	0	0	0
TCGA-ZB-A961-01	THYM		0	0	0	0		0	0		0	0	-1	0	0	0	0		-1	0	0	0	0
TCGA-ZB-A962-01	THYM	0	0	0	0	0	0	0	0	0	0	0	0	0	0	0	0		0	0	0	0	0
TCGA-ZB-A963-01	THYM	0	0	0	0	0	0	0	0	0	0	0	0	0	0	0	0	0	0	0		0
TCGA-ZB-A964-01	THYM	0	0	0	0	0	0	0	0	0	0	0	0	0	0	0	0	0	0	0	0	0	0
TCGA-ZB-A965-01	THYM	0	0	0	0	0	0	0	0	0	0	0	0	0	0	0	0	0	0	0	0	0	0
TCGA-ZB-A966-01	THYM		0		0	0	0	0	0	0	0	0	0	0	0	0		0	0	0	0	0	0
TCGA-ZB-A969-01	THYM	0	0		0	0	0	0	0		0	0	0		0	0		0	0	0	0	1
TCGA-ZB-A96A-01	THYM	0	0	0	0	0	0	0	0	0	0	0	0	0	0	0	0	0	0	0	0	0
TCGA-ZB-A96B-01	THYM	0	0	0	0	0	0	0	0	0	0	0	0	0	0	0	0	0	0	0	0	0	0
TCGA-ZB-A96C-01	THYM	0	0	0	0	0	0	0	0	0	0	0	0	0	0	0	0	0	0	0	0	0	0
TCGA-ZB-A96D-01	THYM	0	0	0	0	0	0	0	0	0	0	0	0	0	0	0	0	0	0	0	0	0	0
TCGA-ZB-A96E-01	THYM	0	0	0	0	0	0	0	0	0	0	0	0	0	0	0	0	0	0	0	0	0	0
TCGA-ZB-A96F-01	THYM		0	0	0	0	-1	1		1	0	0	-1		1	1	0		1	0	0	-1	0
TCGA-ZB-A96G-01	THYM	0	0	0	0	0	0	0	0	0	0	0	0	0	0	0	0	0	0	0	0	0	0
TCGA-ZB-A96H-01	THYM	0	0	0	0	0	0	0	0	0	0	0	0	0	0	0	0	0	0	0	0	0	0
TCGA-ZB-A96I-01	THYM		0		0	0			0	0	0		0	-1		0	0	0	0	0	0	-1	0
TCGA-ZB-A96K-01	THYM	0	0	0	0		0	0	0	0	0	0	0	0	0	0	0		0	0	0	0	0
TCGA-ZB-A96L-01	THYM	0	0		0	0	0	0	0		0	0	0	0	0	0	0		0		0	0
TCGA-ZB-A96M-01	THYM	0	0	0	0	0	0	0	0	0	0	0	0	0	0	0	0	0	0	0	0	0	0
TCGA-ZB-A96O-01	THYM	0	0	0	0	0	0	0	0	0	0	0	0	0	0	0	0	0	0	0	0	0	0
TCGA-ZB-A96P-01	THYM	0	0	0	0	0	0	0	0	0	0	0	0	0	0	0	0	0	0	0	0	0	0
TCGA-ZB-A96Q-01	THYM	0	0	0	0	0	0	0	0	0	0	0	0	0	0	0	0	0	0	0	0	0	0
TCGA-ZB-A96R-01	THYM	0	0	0	0	0	0	0	0	0	0	0	0	0	0	0	0	0	0	0	0	0	0
TCGA-ZB-A96V-01	THYM		0	0	0		0	0	1		0	0	0	0	0	0		0	0	0	0	0	0
TCGA-ZC-AAA7-01	THYM		0		0	0	-1	0	1	0	0	0	1	0	0	0		0	0	0	1	0	0
TCGA-ZC-AAAA-01	THYM	0	0	0	0	0	0	0	0	0	0	0	0	0	0	0	0	0	0	0	0	0	0
TCGA-ZC-AAAF-01	THYM	0	0		0	0	0	0	0	0	0	0	0	0	0	0		0	0	0	0	0	0
TCGA-ZC-AAAH-01	THYM	0	0	0	0	0	0	0	0	0	0	0	0	0	0	0	0	0	0	0	0	0	0
TCGA-ZL-A9V6-01	THYM	0	0	0	0	0	0	0	0	0	0	0	0	0	0	0	0	0	0	0	0	0	0
TCGA-ZT-A8OM-01	THYM	0	0	0	0	0	0	0	0	0	0	0	0	0	0	0	0	0	0	0	0	0	0
TCGA-N5-A4RA-01	UCS	0			-1		1		0	-1	-1	-1	0	0	0		-1	-1	0			-1
TCGA-N5-A4RD-01	UCS		0			0		0	0	0			0	0		0	0		0		0	0	-1
TCGA-N5-A4RF-01	UCS	1	0	-1	-1	0	1	0	1		0		0		1	-1	-1				1	0	1
TCGA-N5-A4RJ-01	UCS		1		-1	0	1	0		-1		0	0	0								1
TCGA-N5-A4RM-01	UCS	0	0		0	0		0					0	-1	-1	-1						0
TCGA-N5-A4RN-01	UCS		0				1					0			0						1		-1
TCGA-N5-A4RO-01	UCS		0			0	0	0	-1	0	-1				-1	-1	-1	-1				0	-1
TCGA-N5-A4RS-01	UCS		1		0	0	0	0	0		0	0		0	0	0			0		1	0	-1
TCGA-N5-A4RT-01	UCS											0	1	-1	-1		-1					1	1
TCGA-N5-A4RU-01	UCS													-1	0	-1							1
TCGA-N5-A4RV-01	UCS		0	0			1	0		-1					0						1
TCGA-N5-A59E-01	UCS									-1	-1	-1			-1		-1	-1			1
TCGA-N5-A59F-01	UCS	0			-1				-1	-1	0	-1	-1		-1		-1	-1			1		-1
TCGA-N6-A4V9-01	UCS				0	0	0	0	0	-1	-1	-1	0	0		0	-1				0	0	-1
TCGA-N6-A4VC-01	UCS		1					-1						0	-1	-1	-1				0	-1
TCGA-N6-A4VD-01	UCS		0	0	0		0	0	0	0	0	0	0	0	0	0	0	0	0	0	0	0
TCGA-N6-A4VE-01	UCS		0		-1	0		-1		-1		0		-1	0	-1	-1		0			0	-1
TCGA-N6-A4VF-01	UCS		0	0	0	0	0		0		-1	0	0		0	-1	-1	0	0	0	0	0	-1
TCGA-N6-A4VG-01	UCS		0							0	1	-1	1	-1	-1	-1	1		1			1	1
TCGA-N7-A4Y0-01	UCS	0	0	0	0		1	0	1	0		0	0	0	0	0	0	0	0	0	1	0	0
TCGA-N7-A4Y5-01	UCS		0		-1		0			-1	0	-1			-1		-1		-1			-1	-1
TCGA-N7-A4Y8-01	UCS	1	1	0	-1	-1	0	0	1	-1				1	0	-1	-1					-1	-1
TCGA-N7-A59B-01	UCS	1	1			0	0	0	1		1	0	0	0			-1		1			-1
TCGA-N8-A4PI-01	UCS	0		0	0	0	0	0	1	0			-1	0	-1	-1	-1		0	0		0
TCGA-N8-A4PL-01	UCS		1		0			0	0	1	1	-1			-1	-1			0		1		-1
TCGA-N8-A4PM-01	UCS	0	0		0		0	-1	0	0	-1		0		0	-1	-1		0		0	-1	-1
TCGA-N8-A4PN-01	UCS		0	1	0	0		0		-1	1			1	0				-1			1	0
TCGA-N8-A4PO-01	UCS				-1		1			-1			-1	-1		-1					1	0	-1
TCGA-N8-A4PP-01	UCS													-1	-1	-1	-1					-1
TCGA-N8-A4PQ-01	UCS	-1		0			-1				1	0		0	-1	-1	-1					1
TCGA-N8-A56S-01	UCS	0	1				1	1			1		1	0	-1		1		1			0	0
TCGA-N9-A4PZ-01	UCS							1				-1					0				1	0
TCGA-N9-A4Q1-01	UCS						1			-1			1		0
TCGA-N9-A4Q3-01	UCS	1			-1	0			-1	-1					0	0			-1			0
TCGA-N9-A4Q4-01	UCS	1	1								0		1		-1				-1		1	0	-1
TCGA-N9-A4Q7-01	UCS		0				1		-1	-1			1	-1	-1		-1		-1			-1	-1
TCGA-N9-A4Q8-01	UCS	1	0		0			0		-1	0		-1	0	1	-1	-1		0		1	1	0
TCGA-NA-A4QV-01	UCS					0				-1	1			-1	0							1	-1
TCGA-NA-A4QW-01	UCS		1				1			-1				1			-1			0		0	1
TCGA-NA-A4QX-01	UCS	0	0				0	0		-1		0			-1	-1	0	-1				0	-1
TCGA-NA-A4QY-01	UCS	1	1	-1		0				-1	0	0	-1	1	1	-1			0		1	0	1
TCGA-NA-A4R0-01	UCS		1	0				0						-1	-1	0						1	-1
TCGA-NA-A4R1-01	UCS	0	0								-1		-1		0			-1	0			0	-1
TCGA-NA-A5I1-01	UCS	-1	0	0	0		0			0	0		0	0	-1	-1			-1		0	0
TCGA-ND-A4W6-01	UCS						0			-1				1	-1				-1			1
TCGA-ND-A4WA-01	UCS	-1	0		-1	-1	0			-1		-1	-1	0	-1	-1	-1		-1			-1	-1
TCGA-ND-A4WC-01	UCS	0	0	0	0	0	0	0	0	0	0	0	0	0	0	0	0	0	0	0	0	0	0
TCGA-ND-A4WF-01	UCS	0			-1			1						-1	0	-1			1			1
TCGA-NF-A4WU-01	UCS		1	-1	0		0	-1	0	0	0			-1	-1	-1	0		-1		-1	0	0
TCGA-NF-A4WX-01	UCS		0						1	-1		-1		1	-1	-1			-1		1	-1
TCGA-NF-A4X2-01	UCS		0						1				0		0	-1	-1			0	0	0	0
TCGA-NF-A5CP-01	UCS	0					0	0		0	0	0	0	0	0	0		0	0	0		0	0
TCGA-NG-A4VU-01	UCS				-1						0		-1	0		-1		-1	-1			0	-1
TCGA-NG-A4VW-01	UCS		0	1	0	1	0	0	1	0	1	0	0	0	0	0	0	0	0	0	0	0	0
TCGA-QM-A5NM-01	UCS		0		-1	0		1	1	-1			0	-1	0	-1	0	-1	0	0	1	0	-1
TCGA-QN-A5NN-01	UCS	-1	0	1		1				-1	1			-1		-1		0	-1		0	1	1
TCGA-3Z-A93Z-01	KIRC	0	1		0	1	0	0	0	0	0	0	0	0		0	0	0	0	0	1	0	0
TCGA-6D-AA2E-01	KIRC	0	0	0	0	0	0	0	0	0	0	0	0	0	0	0	0	0	0	0	0	0	0
TCGA-A3-3306-01	KIRC	0	0		0	0	-1	0	0	-1	0	0		0	-1	0		0	0	0	0	0	1
TCGA-A3-3307-01	KIRC	0	0		0		0	0	0	0	0	0	0	0	0	0	0	0	0	0	0	0	0
TCGA-A3-3308-01	KIRC	0	0		0	0	0	0		0	0	0	0	0	0	0	0			0	0	0	0
TCGA-A3-3311-01	KIRC	0			0	0	0	0	0	0	0	0	0	0	-1	0	0	0	0	0	0	0	0
TCGA-A3-3313-01	KIRC		0	0	0	0		0	0	0	0	0	0	0	0	0	0	1		0	1	0	0
TCGA-A3-3316-01	KIRC		0		-1	1	-1	1	1	-1		-1	0	0	-1	0	-1	-1	0	0	1	1	0
TCGA-A3-3317-01	KIRC	0	0	-1	0			1	0	-1	0	0	0	0	-1	0	0	0	0	0	0	0	0
TCGA-A3-3319-01	KIRC	0	0		0	0	-1	0		-1	0	0	1	0	-1	-1		0	-1	0		0	0
TCGA-A3-3320-01	KIRC	0	0					0	0	0	0	0	0	0	0	0	0	0	0	0	0	0	0
TCGA-A3-3322-01	KIRC	0	0	-1	0	1	0	1	0	0	0	0	0	0	0	0	0	0	0	0	0	1	0
TCGA-A3-3323-01	KIRC	0	0		0	0	0	0	0	0	0	0	0	0	0	0	0	0	0	0	0	0	0
TCGA-A3-3324-01	KIRC	0	0	-1	0	1	0	1	0	0	0	0	0	0	-1	0	0	0	0	0	0	0	0
TCGA-A3-3325-01	KIRC	0	0		0	1		1		-1	0	0	1	1	1	1	1	1	1	1	1	0	0
TCGA-A3-3326-01	KIRC	0	0		0		0	0	0	0	0	0	0	0	0	0	0	0	0	0	0	0	0
TCGA-A3-3331-01	KIRC	0	0		0	1	0	0	0	0		0	0	0	0	0	0	0	0	0	0	0	0
TCGA-A3-3335-01	KIRC	0	0		0		-1	0	0	0	0	0	0	0	-1	0	0	0	0	0	0	0	0
TCGA-A3-3343-01	KIRC		0		0	0	0	0	0	0	0	0	0	0	0	0	0	0	0	0	0	0	0
TCGA-A3-3346-01	KIRC	0	0			0	-1	0		-1	-1		0	-1	-1	0	0		-1	0	0	0	0
TCGA-A3-3347-01	KIRC	0	0		0	0	0	1	0	-1	0	0	1	-1	-1	0	0	0	-1	0		0	-1
TCGA-A3-3351-01	KIRC	0	0		0		0	0	0	0	0	0	0	0	-1	0	0	0	0	0	0	0	0
TCGA-A3-3352-01	KIRC	0	0		-1		-1	0	0	-1	-1	0	0	0	0	0	0	0	0	0	0	0	0
TCGA-A3-3357-01	KIRC	0	0		0	1	0	0	0	0	0		0	0		0	0	0	-1	0	0	0	0
TCGA-A3-3358-01	KIRC	0	0		0		0	1	0	0	0	0	1	0	0	0	1	0	0	0	1	0	0
TCGA-A3-3359-01	KIRC	0			0		0	0	0	0	0	0	0	0	0	0	0	0	0	0	0	0	0
TCGA-A3-3363-01	KIRC	0	0	0	0	0	0		0	0	0	0	0	0	0	0	0	1	0	0	0	0	0
TCGA-A3-3367-01	KIRC	0	0			0	0	0	0	0	0	0	0	0	0	0	0	0	0	0	0	0	0
TCGA-A3-3370-01	KIRC		0		0		0	0	0	0	0	0	0		0	0	0	0	0	0	0	0	0
TCGA-A3-3372-01	KIRC		1	-1	0	1	0	1	-1	-1	0	1	1	0	0	1		0	-1	0	1	1	0
TCGA-A3-3373-01	KIRC		0			0	0	0	-1	0	0	0	0	0	0	0	0	0	0	0	0	0	0
TCGA-A3-3374-01	KIRC	-1	-1	1	1	1	-1	1	0	1	-1	0	1	-1	1	1	0	-1	1	1	1	-1	1
TCGA-A3-3376-01	KIRC	0	0		0		0	0	0	0	0	0	0	0	0	0	0	0	0	0	0	0	0
TCGA-A3-3378-01	KIRC	0	0		0	0	0	0	0	0	0	0	0	0	-1	0	0	0	0	0	0	0	0
TCGA-A3-3380-01	KIRC	-1	0	-1	-1		-1	0	0	0	-1	0	0	0	0	0	0	0	0	0	0	0	0
TCGA-A3-3382-01	KIRC		1	-1	0	1	-1	1		-1	0	0	1	0	-1	-1	1		1	1	1	1	1
TCGA-A3-3383-01	KIRC	0	0		0	0	0	0	0	0	0	0	0	0	0	0	0	0	0	0	0	0	0
TCGA-A3-3385-01	KIRC	0	0	0		1	0	1	0	0	0	0	0	0	0	0	0	0		0	1	0	0
TCGA-A3-3387-01	KIRC	0	0		0		0	0	0	0	0	0	0	0	-1	0	0	0	0	0	0	0	0
TCGA-A3-A6NI-01	KIRC	0	0		0		0	0	0	0	0	0	1	0	-1	0	0	0	0		0	0
TCGA-A3-A6NJ-01	KIRC	0	0		0		0	0	0	0	0	0	0	0	0	0	0	0	0	0	0	0	0
TCGA-A3-A6NL-01	KIRC	0	0		0	1	0	0	0	0	0	0	0	0	0	0	0	0	0	0	0	0	0
TCGA-A3-A6NN-01	KIRC	0	0	-1	0	1	0	0	-1	0		0	0	0	0	0	0	0	0	0	0	0	0
TCGA-A3-A8CQ-01	KIRC	0	1		0	0		1	0	0	0	0	0	0	0	0	0	0	0	0	0	0	0
TCGA-A3-A8OU-01	KIRC	0	0		0	0	0	0	0	0	0	0	0	0	0	0	0	0	0	0	0	0	0
TCGA-A3-A8OV-01	KIRC		0		0	0	0	1	0	0	0	0	0	0	0	0	0	0	0	0	0	0	0
TCGA-A3-A8OW-01	KIRC	0	0		0		0	0	0	0	0	0	0	0	0	0	0	0	0	0	0	0	0
TCGA-A3-A8OX-01	KIRC	0	0	0	0	0	0	0	0	0	0	0	0	0	0	0	0	0	0	0	0	0	0
TCGA-AK-3426-01	KIRC	0	0		0	0	-1	0		-1	0	0	0	-1	-1	0	0	0	0	0	0	0	0
TCGA-AK-3427-01	KIRC	-1	0	0	0	0	0	1	0	0	0	0	0	0	-1	0	0	0	0	0	1	-1	0
TCGA-AK-3428-01	KIRC	0	0		0	0	0	0	0	0	0	0	0	0	0	0	0	0	0	0	0	0	0
TCGA-AK-3430-01	KIRC	0	1		1	1	-1	1	0	0		0	1	0	-1	1	0	0	-1	0	0	-1	0
TCGA-AK-3431-01	KIRC	0	0		0	0	0	0	0	0	0	0	0	0		0	0	0	0	0	0	0	0
TCGA-AK-3433-01	KIRC	-1	-1	-1	0		-1	0	0	0	-1	0	0	-1	0	0	0	-1	0	0	0	-1	0
TCGA-AK-3434-01	KIRC	0	0		0	0	-1	0		0	0	0	0	0	0	0	0	0	0	0	0	0	0
TCGA-AK-3436-01	KIRC		0		-1	1	-1	1		-1	0	0	1	0	-1	0	0	-1	-1		0	0	0
TCGA-AK-3440-01	KIRC	-1	-1	0	0	0	-1	0	-1	0	-1	0	0	-1	0	0	0	-1	-1	0	0	-1	0
TCGA-AK-3443-01	KIRC	0	0	0	0	0	0	0	0	0	-1	0	0	0	0	0	0	0	0	0	0	0	0
TCGA-AK-3444-01	KIRC	0	1		0		0	1	0	0	0	0	0	0	0	0	0	0	0	0	0	0	0
TCGA-AK-3445-01	KIRC	0	0		0	1	0	0		-1	0	0	0	-1		0	0	0	0	0	1	1	0
TCGA-AK-3447-01	KIRC		-1	0	0	0	-1	0	0	0	0	0	0	0	0	0	0	-1	0	0	0	0	0
TCGA-AK-3450-01	KIRC				0	0	0		0	0	0	0	0	0	-1	0	0	0	0	0	0	0	0
TCGA-AK-3451-01	KIRC	0	0		0		0	0	0	0	0	0	0	0	-1	0	0	0	0	0	0	0	0
TCGA-AK-3453-01	KIRC	-1	-1	1	-1	0	-1	1	-1	-1	1	0	0	1	-1	-1	1	1	-1	0	1	-1	-1
TCGA-AK-3454-01	KIRC		0		0			0		0	0	0	0	0	0	0	0	0	0	0	0	0	0
TCGA-AK-3455-01	KIRC		0		0	0	0	0	0	0	0	0	0	0	-1	0	0	0	0	0	0	0	0
TCGA-AK-3456-01	KIRC	0	0	0	0	0	0	0	0	0	0	0	0	0	0	0	0		0	0	0	0	0
TCGA-AK-3458-01	KIRC	0	0		-1		-1	0	-1	0	-1	0	0	0	-1	0	0	0	0	0	0	0	0
TCGA-AK-3460-01	KIRC	0	0	-1	0	1	0	0	0	0	0	0	0	0	0	0	0	0	0	0	0	0	0
TCGA-AK-3465-01	KIRC	-1	-1	0	0	0	-1	0	0	0	-1	-1	0	0	0	0	0	-1	0	0	0	-1	0
TCGA-AS-3777-01	KIRC	-1	-1	0	0	0	-1	0	-1	-1	0	0	0	-1	0	0	0	-1	0	0	0	-1	0
TCGA-AS-3778-01	KIRC	0	0		0	0	0	0	0	0	0	0	0	0	0	0	0	0	0	0	0	0	0
TCGA-B0-4688-01	KIRC	0	0	0		0							1		1		0						1
TCGA-B0-4690-01	KIRC			0	0	0		1	0	-1			1	0	0	0	0	0	0	0	1	0	0
TCGA-B0-4691-01	KIRC	0	0		0		0	1	0	-1	0	0	1	-1	-1	0	0	0	0	0	0	0	0
TCGA-B0-4693-01	KIRC	0	0		0		0	0	0	0	0	0	1	0	0	0	0	0	0	0	0	0	0
TCGA-B0-4694-01	KIRC	0	0		0	0	-1	1	0	0		0	0	0	0	0	0		0		0	0
TCGA-B0-4696-01	KIRC										-1			-1	1							1	0
TCGA-B0-4698-01	KIRC		0	0				-1			0	0		-1		-1	0		-1	0	1	-1	0
TCGA-B0-4699-01	KIRC	-1	-1	0	0	0	-1	0		0	-1	0	0	-1	0	0	0	-1	-1	0	0	-1	0
TCGA-B0-4700-01	KIRC	0	0	0	0	0	0	0	0	0	0	0	0	0	0	0	0	0	0	0	0	0	0
TCGA-B0-4701-01	KIRC	0	0		0		0	0	0	0	0	0	0	0	0	0	0	0	0	0	0	0	0
TCGA-B0-4703-01	KIRC	0			0	1	0	0		0	0	0	0	0	-1	0	0	0		0	0	0	0
TCGA-B0-4706-01	KIRC	0			0	0	0	0	0	0	0	0	0		0	0	0	0	0	0	0	0	0
TCGA-B0-4707-01	KIRC	0			-1	1	-1			-1	0	-1	1	-1	-1	0	1				1	-1
TCGA-B0-4710-01	KIRC	0	1		-1	1	0	1	0	-1	0	1	1		0	0	0	0	1	1	0	-1	0
TCGA-B0-4712-01	KIRC	0	0		-1	1	-1	1		-1	-1	0	1	-1	-1	-1	1	-1	-1	0	1	-1	-1
TCGA-B0-4713-01	KIRC		0		0		0	0		0	0	0	1		-1	0		0	0	0			0
TCGA-B0-4714-01	KIRC	0	0		0		0	1		0	0	0	0	0	0	0	0	0	0	0	0	0	0
TCGA-B0-4718-01	KIRC		0		0	0	0	0		0		0	0	0	0	0	0	0	0	0	0	0	0
TCGA-B0-4810-01	KIRC	0	0		0			0	0	0	0	0	0	0	0	0	0	0	0	0	0	0	0
TCGA-B0-4811-01	KIRC	0	1	-1	-1	1	1	1	0	-1	-1	0	1	0	0	0	1	0		1	1	-1	0
TCGA-B0-4813-01	KIRC	0				0		0		0		0	0	0	0	0	0		0	0	0	0	0
TCGA-B0-4814-01	KIRC	0	0		-1	1	0	0	0	0	0	0	0		-1	0	0	0	0	0	0	0	0
TCGA-B0-4815-01	KIRC	0	0	-1			0	1		-1	0	0	1	0	-1	0	0	0	-1	0	1	0	0
TCGA-B0-4816-01	KIRC	0	0		0	0	0	0		0	0	0	0	0	0	0	0	0	0	0	0	0	0
TCGA-B0-4817-01	KIRC	0	0		0	0	0	0	0	-1	0	0	0	0	-1	0	0	-1	0	0	0	0	0
TCGA-B0-4818-01	KIRC	0	0		0	0	0	0	0	0	0	0	0		0	0	0	0	0	0	0	0	0
TCGA-B0-4819-01	KIRC	0	0	0	0	0	0	0	0	0	0	0	0	0	0	0	0	0	0	0	0	0	0
TCGA-B0-4821-01	KIRC	0			0		0	0	0	-1	0	0		0	0	0	0	0	0			0	0
TCGA-B0-4822-01	KIRC		0	-1	-1	1	-1	0	-1	-1	0	-1	1	0	-1	0	-1	0	-1	1	1	0	0
TCGA-B0-4823-01	KIRC	0	0	-1	0	1	0	0	0	0	0	0	1	0	0	0	0	0	0	0	0	0	0
TCGA-B0-4824-01	KIRC	0	0		0	0		0	0	0	0	0	0	0	0	0	0	0	0	0	0	0	0
TCGA-B0-4827-01	KIRC	0	0		0	0	0	0	0	0	0	0	0	0	0	0	0	0	-1	0	0	0	0
TCGA-B0-4828-01	KIRC	0	0		0	1	0	0	0	0	0	0	0	0	0	0	0	0	0		1	0	0
TCGA-B0-4833-01	KIRC	0	0		0	1	0	0	0	0	0	0	0	0	-1	0	0		0	0	0	0	0
TCGA-B0-4834-01	KIRC	-1	0	0	0	0	0	0	0	0	0	0	0	0	0	0	0	0	0	0	0	-1	0
TCGA-B0-4836-01	KIRC	0	0	-1		1	-1	0		-1		0	0	0	-1	0		0	-1	0		0	0
TCGA-B0-4837-01	KIRC	0	0		0	0		0	0	0		0	0	0	0	0		0	0	0	0	0	0
TCGA-B0-4838-01	KIRC	0	0		0	1	0	1		0	0	0	1	0	-1	0	1	0	0	0	0	0	0
TCGA-B0-4839-01	KIRC	0	0	0	0	1	0	1		0	0	0	0	0	-1	0	1	0	0	0	0	0	0
TCGA-B0-4841-01	KIRC	0	0		0		0	1	0	0	0	0		0	0	0		0	0	0	0	0	0
TCGA-B0-4842-01	KIRC	0	0		0		0	0	0	-1	0	0	0	0		0	0	0	0	0	0	0	0
TCGA-B0-4843-01	KIRC		0		0	0	0	0	0	0		0	0	0	0	0	0	0	0	0	0	0	0
TCGA-B0-4844-01	KIRC	0	0		-1		-1	0	1	0		1	0	0	0	0	0	0	-1	1	1	1	0
TCGA-B0-4845-01	KIRC	-1	0		-1	0	0	0	-1	-1	-1	0	0	0	0	0	0	0	-1	0	0	0	0
TCGA-B0-4846-01	KIRC	0	0		0	0	0	0	0	0	0	0	0	0	0	0	0	0	0	0	0	0	0
TCGA-B0-4847-01	KIRC	0	0		0	0	0	0	0	0	0	0	0	0	-1	0	0	0	0	0	0	0	0
TCGA-B0-4848-01	KIRC		0		0	0			0		0	0	0	0	-1	0	0	0	0	0	0	0	0
TCGA-B0-4849-01	KIRC	0	0		0			0		0	0	0	0	0	0	0	0	0	0	0	0	0	0
TCGA-B0-4852-01	KIRC	0	0		0		0	1	0	0	0	0	0	0	-1	0	0	0	0	0	0	0	0
TCGA-B0-4945-01	KIRC		0		0		0	0	-1	0	0	0	0	0	-1	0	0	0		0	0	0	0
TCGA-B0-5075-01	KIRC	0	0		0	1	0	0	0	0	0	0	1	0	-1	0	0	0	0	0	0	0	0
TCGA-B0-5077-01	KIRC	0	0		0	1	0	1	0	0	0	0	0	0	0	0	1	0	0	0	0	0	0
TCGA-B0-5080-01	KIRC	0	0	-1	0	0	0	0	0	0	0	0	0	0	0	0	0	0	0	0	0	0	0
TCGA-B0-5081-01	KIRC	0	0		0		0	0	0	0	0	0		0	0	1	0	0	0	0	0	0	1
TCGA-B0-5084-01	KIRC		0		-1	0	-1	0	0	0	0	-1		0	-1	-1	0	0	0		0	-1	0
TCGA-B0-5085-01	KIRC	0	0		0		0	0	0	0	0	0	0	0	0	0	0	0	0	0	0	0	0
TCGA-B0-5088-01	KIRC	0			0	0	0	0	0	0	0	0	0	0	0	0	0	0	0	0	0	0	0
TCGA-B0-5092-01	KIRC		0		0		0	0	0	0	0	0	0	0	-1	0	0	0	0	0	0	0	0
TCGA-B0-5094-01	KIRC	0	0		0	1	0	1		-1	0		1	-1	-1	0	0	0		0	1	0	0
TCGA-B0-5095-01	KIRC	0			0	1	0	0	0	-1	0	0	0	0	0	0	0	0	0	0	0	0	0
TCGA-B0-5096-01	KIRC		0		0	0	0	1	0	-1	0	0	0	0	-1	0	0	0	0	0	0	0	0
TCGA-B0-5097-01	KIRC	0	0		0	0	0	0		0	0	0	0	0	-1	0		0	-1	0	0	0	0
TCGA-B0-5098-01	KIRC		0		-1	0	0	0	0	-1	0	0	0	0	0	0	0	0	0		0	0
TCGA-B0-5099-01	KIRC	0			0		0		0	0		0	0		0	0	0		0	0	0		1
TCGA-B0-5100-01	KIRC	0	0	0	0	0	0	0	0	-1	0	0	0	0	0	0	0	0	0	0	0	0	0
TCGA-B0-5102-01	KIRC	-1	0		0	1		1		0	0	0	0	0	0	0	1	1	0	1	0	1	1
TCGA-B0-5104-01	KIRC	0			0	0	0	0	0	0	0	0	0	0	0	0	0	0	0	0	0	0	0
TCGA-B0-5106-01	KIRC	0	0	0	0	1	0	0	0	0	0	0	0	0	-1	0	1	0	0	0	1	1	0
TCGA-B0-5107-01	KIRC	0	0		0		0	0	0	-1	0	0	1	0	-1	0		0	0	0	0	0	0
TCGA-B0-5108-01	KIRC	0	0		0		-1	0		0	0	0	0	0	0	0	0	0	0	0	0	0	0
TCGA-B0-5109-01	KIRC					1	-1				0		1	-1	-1	-1		1	-1		0	-1	-1
TCGA-B0-5110-01	KIRC	0	0		0		0	0	0	0	0	0	0	0		0	0	0	0	0	0	0	0
TCGA-B0-5113-01	KIRC	0	1		-1	1	1	1	0	-1	0	1	1	-1	-1	0	1	0	1	0	1	1	1
TCGA-B0-5115-01	KIRC		0		0	1	0	0	0	0	0	0	0	0	0	0	0	0	0	0	0	0	0
TCGA-B0-5116-01	KIRC	0			-1	0	0	1	0	-1	0		1	0	0	-1	0	0	0	0	1	1	-1
TCGA-B0-5117-01	KIRC	-1	-1	0	0	0	-1	0	0	0	-1	0	0	0	0	0	0	-1	0	0		-1	0
TCGA-B0-5119-01	KIRC	0	0		0	0		0	0	0	0	0	0	0	0	0	0	0	0	0	0	0	0
TCGA-B0-5120-01	KIRC	0		-1	0		0	0	0	0	0	0	0	0	0	0	0	0	0	0	0	0	0
TCGA-B0-5121-01	KIRC	0	0		0		0	0	0		0	0	0	0	0	0	0	0		0	0	0	0
TCGA-B0-5400-01	KIRC	0	0	0	0		0	0	0	0	0	0	0	0	-1	0	1	0	0	0	0	0	1
TCGA-B0-5402-01	KIRC		0		0			0	0	-1		0	0	0	0	0		0	0	0	0	-1	0
TCGA-B0-5690-01	KIRC	0	0		0	0	0	0	0	0	0	0	0	1	0	0	0	0	0	0	0	0	0
TCGA-B0-5691-01	KIRC	0	0				0	0	0	0	0	0	0		0	0	0	0	0	0	0	0	0
TCGA-B0-5692-01	KIRC	0	0		0		0	0	0	0	0	0	0	0	-1	0		0	0	0	0	0	0
TCGA-B0-5693-01	KIRC	0	0		0		0	0	0	0	0	0	0	0	0	0	0	0	1	0	0	0	0
TCGA-B0-5694-01	KIRC	0	0		0		0	1	0	-1	0	0	0	0	0	0	0	0	0	0	0	0	0
TCGA-B0-5695-01	KIRC	0	0		0	0	0	0		0	0	0	0	0	0	0	0	0	0	0	0	-1	0
TCGA-B0-5696-01	KIRC	0	0		0	1	0	0	-1		0	0	1	0	0	0	0		0	0	0	0	0
TCGA-B0-5697-01	KIRC	0	0		0		0	0	0	0	0	0	1	0	-1	0	1	0	0	0	0	-1	0
TCGA-B0-5698-01	KIRC	0	0		0		0	1	0	0	0	0	0	0	0	0	0	0	0	0	0	0	0
TCGA-B0-5699-01	KIRC	0	0			0	0	0	0	0	0	0	0	0	0	0	0	0	0	0	0	0	0
TCGA-B0-5701-01	KIRC		0				0	1		-1	0	0	0	0	-1	0	0	0	0	0	0	0	-1
TCGA-B0-5703-01	KIRC		0		0	0	0	1		0		0	0	0	0	0	0	0	0	0	0	0	0
TCGA-B0-5705-01	KIRC	0	0		0	1	0	0	0	0	0	0	0	0	0	0	0	0	0	0	0	0	0
TCGA-B0-5709-01	KIRC		0				0	0	0	0	0	0	0	0		0	0	0	0	0	0	0	0
TCGA-B0-5710-01	KIRC	0	0		0		0	0	0	0	0	0	0	0	-1	0		0	0	0	0	0	0
TCGA-B0-5711-01	KIRC	0	0		0		0	0	0	0	0	0	0	0	-1	0	0	0	0	0	0	0	0
TCGA-B0-5712-01	KIRC	0	0	0	0	1	0	0		0	0	0	0	0	-1	0	0	0	0	0	0	0	0
TCGA-B0-5713-01	KIRC	0	0		0	1	0	0		0	0	0	1	0	0	0	0	0	0	0	0	0	0
TCGA-B0-5812-01	KIRC	0	0		0		0	0	0	0	0	0	0	0	0	0	0	0	0	0	0	0	0
TCGA-B2-3923-01	KIRC	-1	-1	0	0	0	-1	0	0	0	-1	0	0	0	0	0	0	-1	0	0	0	0	0
TCGA-B2-3924-01	KIRC	0	0		0	1	0	1	0	0	0	0	0	0	0	0	0	0	0	0	0	0	0
TCGA-B2-4098-01	KIRC		0	0	0	0	0	0	0	0	0	0	0	0		0		0	-1	0	0	0	0
TCGA-B2-4099-01	KIRC	0	0		0		0	0	0	0	0	0	0	0	0	0	0	0	0	0	0	0	0
TCGA-B2-4101-01	KIRC	0	0		0		0	0	0	0	0	0	0	0	0	0	0	0	0	0	0	0	0
TCGA-B2-4102-01	KIRC	0	0		0		0	0	0	0	0	0	0	0	-1	0	0	0	0	0	0	0	0
TCGA-B2-5633-01	KIRC	0	0		0		0		0	-1	0	0	0	0	-1	0	0	0	1	0	0	0	0
TCGA-B2-5635-01	KIRC	0	0	0	0	1	0	0	0	0	0	0	0	0	-1	0	0	0	0	0	0	0	0
TCGA-B2-5639-01	KIRC	0	0		0		0		0	0	0	0	0	1	-1	0		0	0	0	0	0	0
TCGA-B2-5641-01	KIRC	0			0			0	0	0	0	0	0	0		0	0	0	-1	0	0	0	0
TCGA-B2-A4SR-01	KIRC	0	0		0	0	0	0		0	0	0	0	0	0	0	0	0	0	0	0	0	0
TCGA-B4-5377-01	KIRC	0	0		0	0	-1	0		0	0	0	0	0	0	0	0	0	0	0	0	0	0
TCGA-B4-5378-01	KIRC	0	0	0	0	0	0	0	0	0	0	0	0	0	0	0	0	0	0	0	0	0	0
TCGA-B4-5832-01	KIRC		1		0		-1	1		-1	1		1	-1	-1	-1	1	0	-1	1	1	1	1
TCGA-B4-5834-01	KIRC	0	0		0		0	0	0	0	0	0	0	0	0	0	1	0	0	0	0	0	0
TCGA-B4-5835-01	KIRC		0			0		1	0	0	0	0	0	-1	0	0			-1	0	0	0	0
TCGA-B4-5836-01	KIRC	0	0		0	0	0	0	0	0	0	0	0	0	-1	0	0	0	0	0	0	0	0
TCGA-B4-5838-01	KIRC	0	1		0	1	0	1	0	0		0	1	0	-1	1	1	1	1	1	1	0	1
TCGA-B4-5843-01	KIRC		1		0	0	0	1	0	0	0	0	0	0	-1	0	0	0	0	0	0	0	0
TCGA-B4-5844-01	KIRC	0	0		0	0	0	0	0	0	0	0	0	0	0	0	0	0	0	0	0	0	0
TCGA-B8-4143-01	KIRC		0		-1			0		0	0	0	1	0	-1	0	0		0	1	0	0	-1
TCGA-B8-4146-01	KIRC	0	0		0		0		0	0	0	0	0		0	0	0	0	0	0	0	0	0
TCGA-B8-4148-01	KIRC	0	0		0	0		0		0	0	0	0	0	0	0	0	0	0	0	0	0	0
TCGA-B8-4151-01	KIRC	0	0		0	0	0	0		0	0	0	0	0	0	0	0	0	0	0	0	0	0
TCGA-B8-4153-01	KIRC	0	0		0	0	0	0	0	0	0	0	0	0	0	0	0	0	0	0	0	0	0
TCGA-B8-4154-01	KIRC	0	0			0	0	0	0	0	0	0	0	0	0	0	0	0	0	0	0	0	0
TCGA-B8-4619-01	KIRC	-1	0	0	0	0	0	1	0	0	0	0	0	0	-1	0	0	0	0	0	0	-1	0
TCGA-B8-4620-01	KIRC	0			0	1	-1	1	0	-1	0	1	0	0	0	-1	1	0	-1	0	1	0	0
TCGA-B8-4621-01	KIRC	0	0		0	0	0	1	0	0	0	0	1	0	0	0	1	1	-1	0	1	0	0
TCGA-B8-4622-01	KIRC	0	0		0	0	0	1	0	-1	0	0	1	0	0	0	0	0	0	0	1	0	0
TCGA-B8-5158-01	KIRC	0	0		-1		-1	0		-1	0	0	0	0	-1	0	0	0	0	0	0	0	0
TCGA-B8-5159-01	KIRC	0	1		0	1	0	0	0	0	0	0	0	0		0	0	0	0	0	0	0	0
TCGA-B8-5162-01	KIRC		0		-1	0	0	0	0	0	0	0	0	0	-1	0	0	0	0	0	0	0	0
TCGA-B8-5163-01	KIRC	0	0	-1	0	1	0	0		0	0	0	1	-1	0	0	0	0	-1	0	1	1	0
TCGA-B8-5164-01	KIRC		0		0	0	0	0	-1	0	0	0	0	0	-1	0	0	0	0	0	0	0	0
TCGA-B8-5165-01	KIRC	0	0		0	0	0	0	0	0	0	0	0	0	0	0	0	0	0	0	0	0	0
TCGA-B8-5545-01	KIRC	0	0	0	0	0	0	0	-1	0	0	0	0	0	0	0	0	0	0	0	0	0	0
TCGA-B8-5546-01	KIRC	0	0	0	0	0	0	0	0	0	0	0	0	0	0	0	0	0	0	0	0	0	0
TCGA-B8-5549-01	KIRC	0			0	1	1	1	0	-1	0	1	1	0	1	0	1	1	0	1	1	1	1
TCGA-B8-5550-01	KIRC		1		0	1	0	1	0	0	-1	0	0	0	-1	0	0	0	-1	0	0	0	0
TCGA-B8-5551-01	KIRC		1		-1	1	0	-1		-1	-1		1	-1	-1	1	-1	1	-1	0	1	-1	0
TCGA-B8-5552-01	KIRC	0	0		0		0	0	0	0	0	0	0	0	0	0	0	0	0	0	0	0	0
TCGA-B8-5553-01	KIRC	0	0		0		0	0	0	0	0	0	0	0	-1	0	0	0	0	0	0	-1	0
TCGA-B8-A54D-01	KIRC	0	0		0	0	0	0	0	0	0	0	0	0	-1	0	0	0	0	0	0	0	0
TCGA-B8-A54E-01	KIRC	0	0	0	0	0	0	1	0	0	0	0	0	0	0	0	1	0	0	0	0	0	-1
TCGA-B8-A54F-01	KIRC	0			0	0	0	0	0	0	0	0	1	0	0	0	0	0	0	0	0	1	0
TCGA-B8-A54G-01	KIRC	0	0		0			0	0	0	0	0	0	0	-1	0	0	0	0	0	0	0	0
TCGA-B8-A54H-01	KIRC	0	0		0		0	0	0	0	0	0	0	0	0	0	0	0	0	0	0	0	0
TCGA-B8-A54I-01	KIRC	0	1		0	1		1		0	0	1	1	0	-1	0	1	0	0	0	1	0	0
TCGA-B8-A54J-01	KIRC	0	0		0		0	0	0	0	0	0	0	0	0	0	0	0	0	0	0	0	0
TCGA-B8-A7U6-01	KIRC	0	0		0		0	0	0	0	0	0	0	0	0	0	0	0	0	0	0	0	0
TCGA-B8-A8YJ-01	KIRC	0	0	0	0	0	0	0	0	0	0	0	0	0	0	0	0	0	0	0	0	0	0
TCGA-BP-4158-01	KIRC	0	0	-1	0	1	0	1	0	0	0	0	0	0	0	0	0	0	0	0	0	0	0
TCGA-BP-4159-01	KIRC	0	0		0		0	1	0	0	0	0	0	0	0		0	0	0	0	0	0	0
TCGA-BP-4160-01	KIRC	0	0		0	1	0	0	0	0	0	0	0	0	0	0	0	0	0	0	0	0	0
TCGA-BP-4161-01	KIRC				0	0	0	0	0	0	0	0	0	0	0	0	0	0	0	0	0	0	0
TCGA-BP-4162-01	KIRC	0	1		0	1	0	1	0	0	0	0	1	0	0	0	1	0	0	0	0	0	0
TCGA-BP-4163-01	KIRC	0	0		0	0	0	0	0	0	0	0	1	0	-1	0	1	0	0	0	0	0	0
TCGA-BP-4164-01	KIRC	0	0		-1	0	-1	0		-1	-1	0	0	0	-1	-1	0	0	-1		0	0	0
TCGA-BP-4165-01	KIRC	0	0		0	0	0	0	0	0	0	0	0	0	0	0	0	0	0	0	0	0	0
TCGA-BP-4166-01	KIRC	0		-1	1	1	0	1	0	0	-1	0	-1	1	0	0	1		-1	1	1	0	1
TCGA-BP-4167-01	KIRC	0	0		0		0	0	0	0	0	0	0	-1	0	0	0	0	-1	0	1	1	0
TCGA-BP-4169-01	KIRC	0	0		0	0	0	0	0	0	0	0	0	0	0	0	0	0	0	0	0	0	0
TCGA-BP-4170-01	KIRC	0			0	0	0	1	0	0	0	0	0	0	0	0	0	0	0	0	0	0	0
TCGA-BP-4174-01	KIRC		1		0	1	0	1		0	0	0	1	0	-1	1	1	0	0	0	0	0	1
TCGA-BP-4176-01	KIRC		0		0	1	-1	1		-1	0	0	1	0	-1	0	0		0	0	1	1	1
TCGA-BP-4177-01	KIRC	0	0	0	0	1	0	0	0	0	0	0	0	0	0	1	0	1	1	0	0	0	0
TCGA-BP-4325-01	KIRC	0	0		0	0		1	0	0	0	0	0	0	0	0	0	0	0	0	0	-1	0
TCGA-BP-4326-01	KIRC	0	0		0	0	0	0		0	0	0	0	0	0	0	0	0	0	0	0	0	0
TCGA-BP-4327-01	KIRC	0	0		0	0	-1	0		0	0	0	0	0	0	0	0	0	0	0	0	0	0
TCGA-BP-4329-01	KIRC		0		0	0	0	0	0	0		0	0	0	0	0	0	0	0	0	0	0	0
TCGA-BP-4330-01	KIRC	0	0		0		0	0	0	0	0	0	0	0	0	0	0	0	0	0	0	0	0
TCGA-BP-4332-01	KIRC	0			0	0	0	1	0	0	0	0	0	1	0	0	0	0	0	0	0	0	0
TCGA-BP-4334-01	KIRC	-1	-1		0	0	-1	0	0	0	-1	0	0	-1	0	0	0	-1	0	0	0	-1	0
TCGA-BP-4335-01	KIRC	0	0		0		0	1	0	0	0	0	0	0	0	0	0	0	0	0	0	0	0
TCGA-BP-4337-01	KIRC	0	1		0		0	1	0	0	0	1	1	0	0	1	1		0	0	1	1	1
TCGA-BP-4340-01	KIRC		1		0	0	0	0	-1	0	0	0	0	0	0	0	0	0		0	0	-1	0
TCGA-BP-4341-01	KIRC	0	0		0	0	0	0		0	0	0	0	0	0	0	0	0	0	0	0	0	0
TCGA-BP-4343-01	KIRC		0		-1	1	0	1	-1	-1	-1	0	0	-1	-1	-1	0	0	-1	0	1	0	-1
TCGA-BP-4346-01	KIRC	0	0		0	0		0	0	0	0	0	0	0	0	0	0	0	0	0	0	0	0
TCGA-BP-4347-01	KIRC	0	1	-1	0	1	0	0	-1	0	0	0	0	0	-1	0	0	0	0	0	0	0	0
TCGA-BP-4349-01	KIRC	0			0	0	0	0	0	0	0	0	0	0	0	0	0	0	0	0	0	0	0
TCGA-BP-4351-01	KIRC	0	1		-1	1	0	1	0	-1	0	1	1	0	1	0	1	0	1	1	1	1	1
TCGA-BP-4352-01	KIRC		-1		0	1	-1	1		-1		-1	0	-1	-1	-1	0	-1	-1			0	1
TCGA-BP-4354-01	KIRC	0	0		0	0	0	1	0	0		0		-1	-1	0	-1	0	0	0	0	0	0
TCGA-BP-4355-01	KIRC	0	0		0		0	0	0	0	0	0	0	0	0	0	0	0	0	0	0	0	0
TCGA-BP-4756-01	KIRC		1	0	0	0	0	0	0	0	0	0	0	0	0	0	1	1	-1	0	0	0	0
TCGA-BP-4758-01	KIRC	0	0		0		0	0	0	0	0	0	0	0	0	0	0		0	0	0	0	0
TCGA-BP-4760-01	KIRC	0	0	0	0	0	0	0	0	0	0	0	0	0	0	0	0	0	0	0	0	0	0
TCGA-BP-4761-01	KIRC	0			0		-1			0	0	0			-1	0		0	-1	0		0	0
TCGA-BP-4762-01	KIRC	0	0				0	0	0	0	0	0	0	0	0	0	0	0	0	0	0	0	0
TCGA-BP-4763-01	KIRC	0	1	-1	0	1	0	0	0	-1	0	0	0	0	-1	0	0	0	0	0	0	1	0
TCGA-BP-4765-01	KIRC		0		0	0	0	0	0	0	0	0	0		0	0	0	0	0	0	0	0	1
TCGA-BP-4766-01	KIRC	0			0	0	0	1	0			0	0	0	0	0	0	0	0	0	0	0	0
TCGA-BP-4768-01	KIRC		1		0		0	1		-1	1	0	1	0	-1	0	1	1	1	1	1	0	0
TCGA-BP-4770-01	KIRC	0			-1		-1	0	0	0	-1	0	0	-1	0	0	-1	0			0	-1	0
TCGA-BP-4774-01	KIRC	0	0		0	0	0	0	0	0	0	0	0	0	0	0	0	0	0	0	0	0	0
TCGA-BP-4775-01	KIRC	-1	1		0		-1	1	-1	0	-1	0	-1	0	0	-1	0	0	0	0	0	0	0
TCGA-BP-4776-01	KIRC	0	0		0		0	0	0	0	0	0	0	0	0	0	0	0	0	0	0	0	0
TCGA-BP-4777-01	KIRC	0	0	-1	0			0	0	0	0	0	0	0	-1	0	0	0	0	0	0	0	0
TCGA-BP-4782-01	KIRC	0	0			0	0	0		0	0	0	1	0	0	0	1	0	0	0	0	0	0
TCGA-BP-4787-01	KIRC	0	0			1	0	1			0	0	1	-1	-1	0	1		0	0	1	0	0
TCGA-BP-4789-01	KIRC	0	0		0		0	0	0	0	0	0	0	0	0	0	0	0	1	0	0	0	0
TCGA-BP-4790-01	KIRC	0	0		0		0	1	0	0	0	0	0	0	0	0	0	0	0	0	0	0	0
TCGA-BP-4795-01	KIRC	0	0	0	0	0	0	0		0	0	0	0	0	0	0	0	0	0	0	0	0	0
TCGA-BP-4797-01	KIRC	0	0		0		-1		0	-1	-1	0	0		-1	-1	-1	-1	-1	0	0	0	0
TCGA-BP-4798-01	KIRC	0	0		0	0	0	1		-1	0	0	0	0	-1	0	1		0	0	1	0	0
TCGA-BP-4799-01	KIRC	-1	0	-1	-1	0	0	1		-1	-1	0	-1	-1	0	-1	-1	-1	-1		1	0	-1
TCGA-BP-4801-01	KIRC	0	0	-1	0		0	0	0	0	0	0	0	0	0	0	0	0	0	0	0	0	0
TCGA-BP-4803-01	KIRC	0	0	-1	0	0	0	1	0	0	0	0	0	0	0	0	0	0	0	0	0	0	0
TCGA-BP-4807-01	KIRC	0	0		0	0	0	0		0	0	0	0	0	0	0	0	0	0	0	0	0	0
TCGA-BP-4959-01	KIRC	0	0		0	0	-1	0		0	0	0	0	0	-1	0	0	0	0	0	0	0	0
TCGA-BP-4960-01	KIRC	0	0		0		-1	1	-1	0	-1	0	0	0	0	0	0	0	0	0	1	-1	-1
TCGA-BP-4961-01	KIRC	0	0		0	0	0	0	0	0	0	0	0	0	0	0	0	0	0	0	0	0	0
TCGA-BP-4962-01	KIRC	0	0		0	0	-1	0	0	0	0	0	0	0	-1	0	0	0	0	0		0	0
TCGA-BP-4963-01	KIRC		0		0			1	0	-1	0	0	1	0	0	0	0	0	0	0	0	0	0
TCGA-BP-4964-01	KIRC	0	0		0	0	0	0	0	0	0	0	0	0	0	0	0	0	0	0	0	0	0
TCGA-BP-4965-01	KIRC		0		0		0	0		0	0	0	0	0	-1	0	0	0	0	0	0	0	0
TCGA-BP-4967-01	KIRC	0	0	0	0	1	0		-1	0	0	0	0	0	0	0	1	0	0	1	1	0	0
TCGA-BP-4968-01	KIRC	0	0		0		0	0	0	0	0	0	0	0	0	0	0	0	0	0	0	0	0
TCGA-BP-4969-01	KIRC	-1	0		-1		-1	1	-1	1	-1	-1	-1	-1	-1	0	0	-1	-1	0	0	0	-1
TCGA-BP-4970-01	KIRC	0	0		0	0	0	0		0	0	0	0	0	-1	0	0	0	0	0	0	0	0
TCGA-BP-4971-01	KIRC	0	0		0	0	0	1	0	0	0	0	0	0	-1	0	1	0	0	0	0	0	0
TCGA-BP-4972-01	KIRC	0	0		0		0	0	0	0	0	0	0	0	0	0	1	0	0	0	0	0	0
TCGA-BP-4973-01	KIRC	0	0		0		0	1	0	0	0	0	0	0	0	0	0	0	0	0	0	0	0
TCGA-BP-4974-01	KIRC	0	0				0	0	0	0	0	0	0	0	0	0	0	0	0	0	0	0	0
TCGA-BP-4975-01	KIRC	0	0		0		0	0	0	0	0	0	0	0	0	0	0	0	0	0	0	0	1
TCGA-BP-4977-01	KIRC	0	0		1		0	1	0	0	0	0	1	0	-1	0	1	0	-1	0	0	0	0
TCGA-BP-4981-01	KIRC	0	0		0		0	0	0	0	0	0	0	0		0	1	0	0	0	0	0
TCGA-BP-4982-01	KIRC	0	0		0		0	0	0	0	0	0	0	0	0	0	0	0	0	0	0	0	0
TCGA-BP-4983-01	KIRC	0	0		0	0	0	0		0	0		0	0	-1	0	0	0	0	0	0	-1	0
TCGA-BP-4985-01	KIRC	0	1			1		1		-1	0	0	1	-1	1	0	0	1	-1		1	1	-1
TCGA-BP-4987-01	KIRC	0	0		0	0		1	0	0	0	0	0	0	0	0	0	0	0	0	0	0	0
TCGA-BP-4989-01	KIRC				1		0	1	0	0	0	0	0	0	-1	0	1	0	0	0	0	0	0
TCGA-BP-4991-01	KIRC	0				0	0	0	0	0	0	0	0	0	0	0	0	0	0	0	0	0	0
TCGA-BP-4992-01	KIRC	0	0	-1	0	1	-1	1	0	0	0	0	1	0	-1	0	0	0	1	0	1	0	-1
TCGA-BP-4993-01	KIRC	0	0		0	0		0	0	0	0	0	0	0	0	0	0	0	0	0	0	0	0
TCGA-BP-4994-01	KIRC	-1	-1	0	0	0	-1	0	-1	-1	-1	0	0	-1	0	0	0	-1	-1	0	0	-1	0
TCGA-BP-4998-01	KIRC	0	0	0	0	0	0	1		0		0	0	0	0	0	0	0	0	0	0	0	0
TCGA-BP-4999-01	KIRC	0	0	-1	0	1	0	0	0	0	0	0	0	0	0	0	0	0	0	0	0	0	0
TCGA-BP-5000-01	KIRC	0	0		0	0		0		-1	0	0	0	0	-1	0	0	0	-1	0		0	0
TCGA-BP-5001-01	KIRC	0			0	0	0		0	0	0	0	0	0	0	0	0	0	0	0	0	0	0
TCGA-BP-5004-01	KIRC		0		0		0	0	-1	0	0	0	0	-1	-1	0	0	0	0	0	0	0	0
TCGA-BP-5007-01	KIRC	0	0		0		0	0	0	0	0	0	0	0	0	0	0	0	0	0	0	0	0
TCGA-BP-5008-01	KIRC	0		-1	0		0	0	0	0	0	0	0	0	0	0	0	0	0	0	0	0	0
TCGA-BP-5010-01	KIRC	0	0		0	0	0	0	0	-1		0	0	0	0	0	0	0	0	0	0	0	0
TCGA-BP-5168-01	KIRC	0	0		0	1	0	0	0	0	0	0	0	0	0	0	0	0	0	0	0	0	0
TCGA-BP-5169-01	KIRC	0	0		0	0		0		-1	0	0	0	0	-1	0	0	0	0	0	0	-1	0
TCGA-BP-5170-01	KIRC	0	0		0		0	1	0	0	0	0	0	0	-1	0	0	0	0	0	0	0	0
TCGA-BP-5173-01	KIRC		1	-1	-1	1	0	1		0	-1	-1	1	0	-1	1	1	1	0	0	1	1	1
TCGA-BP-5174-01	KIRC	0			0	0	0	0	0	0	0	0	0	0	-1	0	0	0	0	0	0	0	0
TCGA-BP-5175-01	KIRC		-1		0	1	-1	0		-1	1	0	1	-1	-1	-1	1	0	0	0	1		-1
TCGA-BP-5176-01	KIRC	0	0		0	0	0	0	0	0	0	0	0	0	0	0	0		0	0	0	0	0
TCGA-BP-5177-01	KIRC	0						1		0	0	0	0	0	0	0	0	0	0	0	0	0	0
TCGA-BP-5178-01	KIRC	0	1		0		-1	1	0	-1	0	0	1	0	0	0	1	0	-1	1	1	1	1
TCGA-BP-5180-01	KIRC	0	0	-1	0	0	-1	0	0	-1		0	0	0	-1	0	0	0	0	0	0	0	0
TCGA-BP-5182-01	KIRC	0	0		0	0	0	0		0	0	0	0	0	0	0	0			0		0	0
TCGA-BP-5183-01	KIRC	0	0		-1		0	0	0	-1	0	0	0	0	-1	0	0	0	0	0	0	0	0
TCGA-BP-5184-01	KIRC	0	0		0	0	0	0	0	0	0	0	0	0	0	0	0	0	0	0		0	0
TCGA-BP-5185-01	KIRC	0	1	-1	0	1	-1	0	1	0	0	1	1	0	0	1		1	0	1	1	1	1
TCGA-BP-5186-01	KIRC	0	0		0	0	0	0	0	0	0	0	0	0	0	0	0	0	0	0	0	0	0
TCGA-BP-5187-01	KIRC	0	0	-1	0	1	0	0	0	0	0	0	0	0	0	0	0	0	0	0	0	0	0
TCGA-BP-5189-01	KIRC	0	0		0		0	0	0	-1	0	0	0	0	-1	0	0	0	0	0	0	0	0
TCGA-BP-5190-01	KIRC	0	0		0		0	0	0	0	0	0	0	0	-1	0	0	0	0	0	0	0	0
TCGA-BP-5191-01	KIRC	0	0		0	1	-1	0	1	-1	0	0	1	-1	-1	0	0	0	-1	0	1	1	0
TCGA-BP-5192-01	KIRC	0	0		0		0	0	0	0	0	0	0	0	0	0	0	0	0	0	0	0	0
TCGA-BP-5194-01	KIRC	0	0		0	0	0	0	0	0	0	0		0	0	0	0	0	0	0	0	0	0
TCGA-BP-5195-01	KIRC	0	0		0	0	0	0	0	0	0	0	0	0		0	0	0	0	0	0	0	0
TCGA-BP-5196-01	KIRC	0			-1	0	0	0		-1	-1	0	0		-1	0	0	-1	-1	0	0	0	-1
TCGA-BP-5198-01	KIRC	0	0		-1	0	0	1	0	-1	-1	0	0	1	-1		1		0		1	-1	1
TCGA-BP-5200-01	KIRC	0	1	-1	0	1	0	1	-1	0	0	1	1	1	0	-1	1	1	-1	1	1	0	1
TCGA-BP-5201-01	KIRC	0	0				-1	0	0	-1	0	0	0	0	-1	0	0	0	-1	0	0	0	0
TCGA-BP-5202-01	KIRC	0	0		0		0	0	0	0	0	0	0	0	0	0	0	0	0	0	0	0	0
TCGA-CJ-4634-01	KIRC	0	0		0	0		0	0	0	0	0	0	0	0	0	0	0	0	0	0	0	0
TCGA-CJ-4635-01	KIRC		0	-1	0	1	-1	1	0	-1	-1	1	0	0	0	0	0	0	1	1	1	1	0
TCGA-CJ-4636-01	KIRC	0	0			1	0	1	0	0	0	0	1	0	-1	0	1	0	-1	0	0	0	0
TCGA-CJ-4637-01	KIRC		0		0		0	0	0	0	0	0	0	0	-1	0	0	0	0	0	0	0	-1
TCGA-CJ-4638-01	KIRC		0		0		0	0	0	-1	0	0	0	0	-1	0	0	0	0	0	0	1	0
TCGA-CJ-4639-01	KIRC	0	0		0	1	0	0	0	0	0	0	0		0	0	0	0	0	0	0	0	0
TCGA-CJ-4640-01	KIRC		0		0	0		0	-1	0	0	0		0	-1	0	0	0	0	0	0	0	0
TCGA-CJ-4643-01	KIRC	0	0		0	0	0	0		0	0	0	0	0	0	0	0	0	0	0	0	0	0
TCGA-CJ-4644-01	KIRC	0	0		0	0	0	1	0	0	0	0	0	0	0	0	0	0	0	0	0	0	0
TCGA-CJ-4868-01	KIRC	0			0	0	0	0	0		0	0	0	0	0	0	0	0	0	0	0	0	0
TCGA-CJ-4869-01	KIRC		0		0	0	0	0	0	0	0	0	0	0	-1	0	0	0	0	0	0	0	0
TCGA-CJ-4871-01	KIRC	0	0		0		0	0	0	0	0	0	0	0	0	0	0	0	0	0	0	0	0
TCGA-CJ-4873-01	KIRC		0		0	1	0	1	0		0	0	1	0	-1	0	1	1	-1	1	1	1	0
TCGA-CJ-4874-01	KIRC	0	0		0		0	0	0	0	0	0	0	0	0	0	0	0	0	0	0	0	0
TCGA-CJ-4875-01	KIRC	0	0		0	1	0	1	0	0	0	0	0	0	-1	1	1	0	0	0	1	0	0
TCGA-CJ-4876-01	KIRC		1		0			0	-1		0	0	0	0	-1	0	0	0	0	0	0	0	0
TCGA-CJ-4878-01	KIRC		0			0		0		0	0	0	0	0	0	0	0	0	0	0	0	0	0
TCGA-CJ-4881-01	KIRC		0		0		0			-1	0	0		-1	-1	0	0	0	-1	0		0	0
TCGA-CJ-4882-01	KIRC	0	0		0	0	0	0	0	0	-1	0	0	0	0	0	0	0		0	0	0	0
TCGA-CJ-4884-01	KIRC	0	0		0		0	0		0	0	0	1	0	-1	0	0	0	0	0		0	0
TCGA-CJ-4885-01	KIRC	0	0		0	1	1	1		0	0	1	0	0	0	0	1	0	0	0	0	0	0
TCGA-CJ-4886-01	KIRC	0	0		0		0	0	0	0	0	0	0	0	0	0	0	0	0	0	0	0	0
TCGA-CJ-4887-01	KIRC	0	0		0	1		1	0	0	0	0	0	0	0	0	0	0	0	0	0	0	0
TCGA-CJ-4891-01	KIRC	0	0		0	0	0	0	0	-1	0	0	0	0	0	0	0	0	0	0	0	0	0
TCGA-CJ-4892-01	KIRC	0	0		0	1		0	0	0	0	0	0	0	0	0	0	0	0	0	0	0	0
TCGA-CJ-4893-01	KIRC	0	1		0			0	0	0	-1	0	0	0	-1	0	0	0	0	0	0	0	0
TCGA-CJ-4894-01	KIRC		0			0	0	0		0	0	0	0	0	-1	0	0	0	0	0	0	0	0
TCGA-CJ-4895-01	KIRC	0	0		0	0		0	0	-1	0	0	0	0	0	0	0	0	0	0	0	0	0
TCGA-CJ-4897-01	KIRC	-1	1		-1	1	-1	1	-1	1	0	-1	-1	1	-1	1	1	-1	1	0	1	-1	-1
TCGA-CJ-4899-01	KIRC	0	0		0	1	0	0	0	0	0	0	0	0	0	0	0	0	0	0	0	0	0
TCGA-CJ-4900-01	KIRC	0	0		0		0	0	0		0	0	0	0		0	0	0	0	0	0	0	0
TCGA-CJ-4901-01	KIRC	-1	1		-1		-1	1	0	-1	-1	0	-1	-1		-1	1	1	-1	1	1	-1	-1
TCGA-CJ-4902-01	KIRC	0			0		0	0	0	0	0	0	0	0	0	0	0	0	0	0	0	0	0
TCGA-CJ-4903-01	KIRC		0		0	0	0	0	0	0	0	0	0	0	0	0	0	0	0	0	0	0	0
TCGA-CJ-4904-01	KIRC	0	0	-1	0	1	0	0	0	0	0	0	0	0	0	0	0	0	0	0	0	0	0
TCGA-CJ-4905-01	KIRC	0	0		0	0	0		0	0	0	0	0	1	0	0	0	0	1	0	0	0	0
TCGA-CJ-4907-01	KIRC	0	0		0		0	0	0	0	0	0	0	0	0	0	0	0	0	0	0	-1	0
TCGA-CJ-4908-01	KIRC	0	0		0		0	0	0	0	0	0	0	0	0	0	0	0	0	0	0	0	0
TCGA-CJ-4912-01	KIRC	0	0	0	0	1	0			-1	0	0	1	1		0	0		0	0	0	0	0
TCGA-CJ-4913-01	KIRC	0	0				0	0	0	0	0	0	0	0	0	0	0	0	0	0	0	0	0
TCGA-CJ-4916-01	KIRC		0		0		0	0	0	0	0	0	0	0	-1	0	0	0	0	0	0	0	0
TCGA-CJ-4918-01	KIRC	0	0		0		0	0	0	0	0	0	0	0	0	0	0	0	0	0	0	0	0
TCGA-CJ-4920-01	KIRC	0	0		0	0	0	0	0	0	0	0	0	0	0	0	0	0	0	0	0	0	0
TCGA-CJ-4923-01	KIRC		0		0		0	0	0	0		0	0	0	0	0		0	0	0	0		0
TCGA-CJ-5671-01	KIRC	0	1		0	1	1	1	0	-1	0	0	1	1	-1	1	1	0	0	1	1	0	1
TCGA-CJ-5672-01	KIRC	0	1		0		0			0	0	0	0	0	-1	0	1	0	0	0	0	0	0
TCGA-CJ-5675-01	KIRC		0		0			0	0	0		0	0	0	-1	0	0	0	0	0	0	0	0
TCGA-CJ-5676-01	KIRC	0	0		0	1	0	0	0	0	0	0	0	0	-1	0	0	0	0	1		0	1
TCGA-CJ-5677-01	KIRC	0	0		0	0	0		0	-1	0	0	0	0	-1	0	0		-1	0	0	0	0
TCGA-CJ-5678-01	KIRC		0		0		0	0	0	0	0	0	0	0	-1	0	0	0	0	0	0	0	0
TCGA-CJ-5679-01	KIRC		0	-1	-1	1	-1	1	0	-1	0	0	1	-1	-1	0	1	0	-1	0	1	1	0
TCGA-CJ-5680-01	KIRC	0	0		0	0		0	0	-1	0	0	0	0	-1	0	0	0	0	0	0	0	0
TCGA-CJ-5681-01	KIRC	0	0		0	0	0	0	0	0	0	0	0	0	0	0	0	0	0		0	0	0
TCGA-CJ-5682-01	KIRC	0	1	-1	0	1	0	1	0	-1	0	1	1	1	-1	0	1	0	0	1	1	0	1
TCGA-CJ-5683-01	KIRC	0	0		0	1	0		0	0	0	0	0	0	0	0	1	0	0	0	0	0	0
TCGA-CJ-5684-01	KIRC	0	0		0	1	0	0	0	0	0	0	0	0	0	0	0	0	0	0	0	0	0
TCGA-CJ-5686-01	KIRC	0	0		0	1	0	0	0	0	0	0	0	0	-1	0	0	0	0	0	0	-1	0
TCGA-CJ-5689-01	KIRC	0	0	-1	0	0	0	0	-1	0	0	0		1	-1	0	0	0	0	0	0	0	0
TCGA-CJ-6027-01	KIRC		0	-1	0	0	-1	0		-1	0	0	0	0		0	0		-1	0	0	1	0
TCGA-CJ-6028-01	KIRC	-1	1		-1	1	-1	1	-1	-1	-1	0	1	-1	1	-1	1	-1	-1	1	1	-1	-1
TCGA-CJ-6030-01	KIRC		0			0	0	0	-1	-1	0	0	0	0	-1	0	0	0	0	0	0	0	0
TCGA-CJ-6031-01	KIRC	0	0		0		0	0	0	-1	0	0	0	0	0	0	0	0	0	0	0	0	0
TCGA-CJ-6032-01	KIRC		1		0	0		0	0	0		0	0	0	0	0	0	0		0	0	0	0
TCGA-CJ-6033-01	KIRC	0	0		0		0	0		-1	0	0	0	0	-1	0	0	0	0	0	0	0	0
TCGA-CW-5580-01	KIRC	0	0		0	0	0	0	0	-1	0	0	0	0	0	0	0	0	0	0	0	0	0
TCGA-CW-5581-01	KIRC	0	0				0	0	0	0		0	0	0	0	0	1	0	0	0	0	0	0
TCGA-CW-5583-01	KIRC	0	0		0		0	0	0	0	0	0	0	0	0	0	0	0	1	0	0	0	0
TCGA-CW-5584-01	KIRC	0	0		0	0		0	0	0	0	0	0	0	-1	0	0	0	0	0	0	0	0
TCGA-CW-5585-01	KIRC		0		0			0	0	0	0	0	0	0	0	1	0	0	1	0	0	0	0
TCGA-CW-5587-01	KIRC		1		0	1	0	0	0	0	0	0	0	0	-1	0	0	0	0	0	0	0	0
TCGA-CW-5588-01	KIRC	-1	0		-1	1	-1	1	0	-1	0	-1	1	-1	-1	0	0	-1	-1	0	0	-1	0
TCGA-CW-5591-01	KIRC	-1	1		-1		-1	0	1	-1	-1	-1	0	-1	-1	-1	0	-1	-1	0	1	0	0
TCGA-CW-6088-01	KIRC	0	0		0	0	0	0	-1	0	0	0	0	0	0	0	0	0	0	0	0	0	0
TCGA-CW-6090-01	KIRC			-1	-1	0	0	0	-1	-1		0	0	-1	-1	0	0	0	0	0	0	0	0
TCGA-CW-6093-01	KIRC	0	0		0	0	0	1	0	0	0	0	0	0	0	0	0	0	0	0	0	0	0
TCGA-CW-6097-01	KIRC	0	0	0	0	0	0		0	0	0	0	0	0	0	0	0	0	0	0	0	0	0
TCGA-CZ-4853-01	KIRC	0	0		0		-1	0	0	0	0	0	0	0	0	0	0	0	0	0	0	0	0
TCGA-CZ-4854-01	KIRC		0	-1	-1	1	-1	1		-1		-1	1		-1	-1	-1	-1	-1	1	1	0	-1
TCGA-CZ-4856-01	KIRC	0	0				0	0	0	0	0	0	1	0	0	0	0	0	0	0	0	0	0
TCGA-CZ-4857-01	KIRC		0		0		0	1	0	-1	0	0	1		0	-1	0	0	-1	0	1	0	0
TCGA-CZ-4858-01	KIRC				-1		-1	1	1	-1		1	0	0	-1	0	1			0	1	0	0
TCGA-CZ-4859-01	KIRC				0	0		0	0	0	0	0	0	0	0	0	1	0	0	0	0	0	0
TCGA-CZ-4860-01	KIRC	0	1		-1		0	1	0	-1	-1		0	-1	-1	0	1		0	0	1	-1	1
TCGA-CZ-4861-01	KIRC	0	0		0		0	0	0	0	0	0	0	0	0	0	0	0	0	0	0	0	0
TCGA-CZ-4862-01	KIRC	0	0	0	0	0	0	0	-1	0	0	0	0	0	0	0	0	0	0	0	0	0	0
TCGA-CZ-4863-01	KIRC	0	0	0	0	0	0	0	0	0	0	0	0	0	-1	0	0	0		0	0	0	0
TCGA-CZ-4864-01	KIRC		0	-1	0	1		0	0	0	0	0	0	0	-1	0	0	0	0	0	0	0	0
TCGA-CZ-4866-01	KIRC	0	0		0	1		1	1	1	1	1	1	0	-1	1	1	1	-1	1	1	1	-1
TCGA-CZ-5451-01	KIRC	0	0	-1	0	1	0	0	0	0	0	0	0	0	0	0	0	0	0	0	0	0	0
TCGA-CZ-5452-01	KIRC	0	0	-1	0	0		0	0		0	0	0	0	-1	0	0	0	0	0	0	0	0
TCGA-CZ-5453-01	KIRC	0			0	0	0			0	0	0	0	0	0	0	0	0	0	0	0	0	0
TCGA-CZ-5454-01	KIRC		0		0		0	1	0	0		0	0	0	0	0		0	0	0	0	0	0
TCGA-CZ-5455-01	KIRC	0	0		0		0	0	0	0	0	0	0	-1	-1	0	0	0	0	0	0	0	0
TCGA-CZ-5456-01	KIRC	-1	0		-1		-1	1	1	-1	-1	-1	1	-1	-1	0	1	-1	-1	0	1	-1	-1
TCGA-CZ-5457-01	KIRC	-1	1	-1	-1	1	0	1	-1	1	-1	0	-1	-1	0	-1		0	0	1	0	-1	-1
TCGA-CZ-5458-01	KIRC	0	0		0		0	0	0	0	0		0	0	0	0	0	0	0	0	0	-1	0
TCGA-CZ-5459-01	KIRC	0	0	-1	0	0	0	0	0	0	0	0	0	0	0	0	0	0	0	0	0	0	0
TCGA-CZ-5460-01	KIRC	0	0		0	0			0	0	0	0	0	0	0	0	0	0	0	0	0	0	0
TCGA-CZ-5461-01	KIRC	0	1	-1	-1	1	0	1	0	-1	0	0	1	1	-1	-1	0	0	0	1	1	1	-1
TCGA-CZ-5462-01	KIRC		0		0			0			0	0	0	0	-1	0	0	0	0	0	0	0	0
TCGA-CZ-5463-01	KIRC	0	0	-1	0	1	0	0	-1	0	0	0	0	0	-1	0	0	0	0	0	0	0	0
TCGA-CZ-5464-01	KIRC	0	0			1	0	1	1	0	0	0	1	1	0	0	0	0	0	1	1	0	0
TCGA-CZ-5465-01	KIRC		1		-1	1	-1	1		0	-1	0	1	0	0	1	1	0	1	1	1	0	1
TCGA-CZ-5466-01	KIRC	0	0		0	1	0	1			0	0	1		0	0	0	0	0	0	0	-1	0
TCGA-CZ-5467-01	KIRC	0	0		0		0	0	0	0	0	0	0	0		0	1	0	1	0	0	0	0
TCGA-CZ-5468-01	KIRC	0			0	1		1					1	-1	-1	0	0		-1	0	1	1	-1
TCGA-CZ-5469-01	KIRC	-1	1		-1		0	0	1	-1	-1	-1	1	-1	-1	-1	1	1	0	1	1	1	-1
TCGA-CZ-5470-01	KIRC	0	0		0		0	0		0	-1	0	0	0	-1	0	0	0	0	0	0	0	0
TCGA-CZ-5982-01	KIRC	0	0		0	0		0	0	0	0	0	0	0	0	0	0	0	0	0	0	0	0
TCGA-CZ-5984-01	KIRC	0			0	1	-1	1	0	-1	0	0	1	0	-1	-1	1	0	0	1	1	0	1
TCGA-CZ-5985-01	KIRC	0			0			0	0	-1	0	0	0	0	-1	0	0	0	-1	0	0	0	0
TCGA-CZ-5986-01	KIRC	0	0	-1	0	1	0	0	-1	0	0	0	0	0	0	0	0	0	0	0	0	0	0
TCGA-CZ-5987-01	KIRC	0	0	-1	0	0	-1	0	0	-1	0	0	1	0	-1	0	0	0	0	0	0	0	0
TCGA-CZ-5988-01	KIRC	0			0	0	0		-1	0	0	0	0	0	0	0	0	0	-1	0	0	0	0
TCGA-CZ-5989-01	KIRC	0			0		0		0	0	0	0	0	0	-1	0	0	0	0	0	0	0	0
TCGA-DV-5565-01	KIRC	0	0		0	0		1		0		0	0	0	0	0	0		0	0	0	0	0
TCGA-DV-5566-01	KIRC	0	0		0	0	0	0	0	0	-1	0	0	0	0	0	0	0	0	0	0	0	0
TCGA-DV-5567-01	KIRC	0	0	0	0	0	0	0	0	0	0	0	0	0	0	0	0	0	0	0	0	0	0
TCGA-DV-5569-01	KIRC	0	0		0		0	0	0	0	0	0	0	0	0	0	0	0	0	0	0	0	0
TCGA-DV-5575-01	KIRC	0	0		0	0		0		0	0	0	0	0	0	0	0	0	0	0	0	0	0
TCGA-DV-5576-01	KIRC	0	0	0	0	0	0	0	0	-1	0	0	0	0	0	0	0	0	0	0	0	0	0
TCGA-DV-A4VX-01	KIRC	0	1		0		0	1	1	0	0	0	1		-1	0	1		0	0	1	-1	0
TCGA-DV-A4VZ-01	KIRC	0	0	0	0	0	0	0	0	0	0	0	0	0	0	0	0	0	0	0	0	0	0
TCGA-DV-A4W0-01	KIRC	0			0		0	0	0		0	0	0	0	0	0	1	0	0	0	0	1	0
TCGA-EU-5904-01	KIRC	0	0		0		0	0	0	0	0	0	0	0	0	0	0	0	0	0	0	0	0
TCGA-EU-5905-01	KIRC	-1	0		-1	1	-1	-1	-1	-1	1	0	0	-1	-1	-1	0	0	-1	0	1	0	-1
TCGA-EU-5906-01	KIRC	0	0		0		0	0	0	0	0	0	0	0	0	0	0	0	0	0	0	0	0
TCGA-EU-5907-01	KIRC		0		-1		-1	0	0	0		0	0	0	0	0	0	0	0	0	0	0	0
TCGA-G6-A5PC-01	KIRC		0		0		0	0	0		0	0	0	0	-1	0	0	0	0	0	0	0	0
TCGA-G6-A8L6-01	KIRC	0	0		0	0	0	0	0	0	0	0	0	0	0	0	0	0	0	0	0	0	0
TCGA-G6-A8L7-01	KIRC	0	0			0	-1	1	0	-1	0	0	0	-1	0	0	0		0	0	0	0	0
TCGA-G6-A8L8-01	KIRC		0		0	0		0		0	0	0	0	0		-1		0	0	0	0	0	0
TCGA-GK-A6C7-01	KIRC		0		0	1	0	0	0	0	0	0	0	0	0	0	0	0	0	0	0	0	0
TCGA-MM-A563-01	KIRC	0	0		0	0	-1	0		-1	0	0	0	0	-1	0	0	0	0	0	0	-1	0
TCGA-MM-A564-01	KIRC		0	-1	0	1	0	1		0	0	0	0	0	0	0		0	0	0	0	0	0
TCGA-MM-A84U-01	KIRC	0	0		0	0	0	0	0	-1	0	0	0	0	-1	0	0	0	-1	0	0	0	0
TCGA-MW-A4EC-01	KIRC	0	0		0	1		0	0	0	0	0	0	0	0	0	0	0	0	0	0	0	0
TCGA-T7-A92I-01	KIRC		0	0	0	0	0	0	0	0	0	0		0	0	0	0	0	0	0	0	0	0
TCGA-3H-AB3K-01	MESO		0	0	0	0		0		0	0	0	0	0	0	0	0		0	0		0	-1
TCGA-3H-AB3L-01	MESO	0		0	-1			0	0	-1		0	0	-1	-1	0	0		0			0	-1
TCGA-3H-AB3M-01	MESO					0			0		0		0	0	-1	0	0				0	0	-1
TCGA-3H-AB3S-01	MESO		0		0	0	0	0			0	0	0	0	-1		0	0	0		0	0	-1
TCGA-3H-AB3T-01	MESO		0	0		0		0	0	-1	0			-1	0	-1			0	0	0	0	-1
TCGA-3H-AB3U-01	MESO		0	0	-1		-1		0	-1	-1	0	0	-1	-1	-1	0	0	-1	-1	0	-1	-1
TCGA-3H-AB3X-01	MESO		0	0		0	0	0		0	0		0		-1	0		0	0		0	0	-1
TCGA-3U-A98D-01	MESO				-1			0			-1	0		0	-1		0	0		0	0	0	-1
TCGA-3U-A98E-01	MESO	0	0	0	0	1		0	0	0	0	0	0	0	0	0	0	0	0	0	0	0	0
TCGA-3U-A98F-01	MESO		1	-1	-1	0		1	1		1	1			1	0		1	1	0	1	1	-1
TCGA-3U-A98G-01	MESO	0	0	0	0	0	0	0	0	0	0	0	0	0	0	0	0	0	0	0	0	0	0
TCGA-3U-A98H-01	MESO	0	0		0	0	0	1	0	0	0	0	0	0	0	0	0	0	0	0	0	0	-1
TCGA-3U-A98I-01	MESO	0	0		-1			0	0	0		0	0	-1	-1	0					0	0	-1
TCGA-3U-A98J-01	MESO			0		0		0		0	0	0	0	0	-1	0		0	0	0	0	1	-1
TCGA-LK-A4NW-01	MESO	0	0	0	0		0	1	1		0		1	-1	0	0			0	0		0	0
TCGA-LK-A4NY-01	MESO			0	0	0		0	0				0	0						0		0	-1
TCGA-LK-A4NZ-01	MESO		0		0	0			0	0	0	0	0	0	0	0	0		0	0	0	0	-1
TCGA-LK-A4O0-01	MESO		1	1	0	1	0		0		1		1	0	1		0	1		1		0	0
TCGA-LK-A4O2-01	MESO							1	0	0		0	0	-1	-1	0		0	0	0	0	-1	-1
TCGA-LK-A4O4-01	MESO	0	0	0	0	0	0	0	0	0	0	0	0	0	0	0	0	0	0	0	0	0	0
TCGA-LK-A4O5-01	MESO				0	0	0	0			0	0	0	0	-1	0	0	0	0	0		0	-1
TCGA-LK-A4O6-01	MESO		0		-1	0	0	0	0		0	0	0	0	-1	0		0	0	0	0	0	-1
TCGA-LK-A4O7-01	MESO		0	-1	-1			0	0		0			0	-1	0	0	0	0	0	0	0	-1
TCGA-MQ-A4KX-01	MESO	0	0	0	0	0		0		0	0	0		-1	0	0	0	0	0	0	0	0
TCGA-MQ-A4LC-01	MESO		0	0	0	0		0		0	0	0	0		0	0	0		0	0	0	0
TCGA-MQ-A4LI-01	MESO		0	0	-1	0	0	0			0	0	0	-1	-1	0		0	-1	0	0	0	-1
TCGA-MQ-A4LJ-01	MESO			0	0	0	0	0	0		0	0	0	-1	-1			0	0		0	0	-1
TCGA-MQ-A4LM-01	MESO		0		-1	0		0					0	-1	0	0		0	-1	0	0	0	-1
TCGA-MQ-A4LP-01	MESO				-1		0	0	0		-1	0	0		0			0	0		0		-1
TCGA-MQ-A4LV-01	MESO	0	0			0	0	0	0				0	-1	0	0			0	0	0	0	-1
TCGA-MQ-A6BL-01	MESO					0		0	0	0	0	0	0	-1	0	0	0	0	-1	0	0	0	0
TCGA-MQ-A6BQ-01	MESO	0	0	0	0	0		0		0	0	0	0	0		0	0		0			0	-1
TCGA-MQ-A6BR-01	MESO	0	0	0	-1	1	0	0		0	0		0	0	0	0	0	0	0	0	0	0	0
TCGA-MQ-A6BS-01	MESO		1					0	0	-1	-1		0	-1	-1				-1	-1		-1	-1
TCGA-NQ-A57I-01	MESO	0	0	-1	1	0	-1			-1	-1			0	1	-1	0		0	-1	0	0	-1
TCGA-NQ-A638-01	MESO		0	0			-1		0	-1			0	0	-1				0	1	0	-1	-1
TCGA-SC-A6LM-01	MESO		0				0	0	0	-1		0	0	0	0	0	0	0			0	0	-1
TCGA-SC-A6LN-01	MESO		0	0	-1		0		0		0			-1	-1		0		0	0		0	-1
TCGA-SC-A6LP-01	MESO	0	0	0	0	1	0		0	0	0	0	0	0	0	0	0	0	0	0	0	0	0
TCGA-SC-A6LQ-01	MESO	0		0	0	0	0	0			0	0	0	0	0	0				0	0	0	-1
TCGA-SC-A6LR-01	MESO		-1		-1			0	0		-1	0	-1	-1	-1	0	1		-1		-1	-1	-1
TCGA-SC-AA5Z-01	MESO	-1	-1		-1	0	0	1		-1	0	1	-1	-1	-1	-1	1	-1	-1	-1	1	-1	-1
TCGA-SH-A7BC-01	MESO		0		-1	0		0	0					-1	-1		0		-1			0	-1
TCGA-SH-A7BD-01	MESO		0		0			0	0	0		0	0	-1	0	0	0	0	0	0	0	0
TCGA-SH-A7BH-01	MESO		-1	1	-1	1	0	1	1	0	-1	0	-1	-1	-1	-1	1	-1	1	1	0	1	1
TCGA-SH-A9CT-01	MESO		0			0	0	0							-1		0			0	0	-1	-1
TCGA-SH-A9CU-01	MESO							1	0	1	0	1			-1		1	0	1	1	1	1	-1
TCGA-TS-A7OU-01	MESO	0			0	0	0	0		0		0	0	0	0	0	0		0	0	0	0
TCGA-TS-A7OY-01	MESO	0	0	0		0	0	0	0		0	0	0		-1	0	0		0	0	0	0	-1
TCGA-TS-A7OZ-01	MESO		0			0	0	0			0		0	0	-1		0	0	0		0	0	-1
TCGA-TS-A7P0-01	MESO		0	0	-1			1	1			0			-1					0		-1
TCGA-TS-A7P1-01	MESO		0	0			0	0				0	0		0	0	0	0	0	0	0	-1
TCGA-TS-A7P3-01	MESO		0		0	0	0	0	0		0	0	0	0	0	0	0		0	0	0	0	-1
TCGA-TS-A7P6-01	MESO		-1	0			-1	0	0		0	0	0	-1	0		0	0	0		0	0	-1
TCGA-TS-A7P8-01	MESO	0	0	0	0	0	0	0	0	0	0	0	0	0	0	0	0	0	0	0	0	0	0
TCGA-TS-A7PB-01	MESO		0		0	0		0	0	0	0	0	0	0	0	0	0		0	0	0
TCGA-TS-A8AI-01	MESO				-1		0		0				0	-1	0	0	0	0	0		0	0
TCGA-TS-A8AS-01	MESO	0	0		0	0		0	0	0	0	0	0	-1	0	0	0	0	0	0	0	0	0
TCGA-TS-A8AY-01	MESO			0		0		0				0	0	-1	-1	0			0	0		0	-1
TCGA-UD-AABZ-01	MESO		0					0	0		0	0		-1	-1	-1		0	0	0	0	1	-1
TCGA-UD-AAC1-01	MESO	0	0	0	0	1	0	1	0	0	0	0	0	0	0	0	0	0	0	0	0	0	0
TCGA-UD-AAC4-01	MESO		0		0	0		0		0		0		0	0	0	0		0		0	0	-1
TCGA-UD-AAC5-01	MESO		0		-1	0		0			0	0	1	0		1	0		0	1	0
TCGA-UD-AAC6-01	MESO		0			0		1	0		0	0	1		0	0			0	0	0	0	-1
TCGA-UD-AAC7-01	MESO		0		-1	0		0	0		0	0	0	-1	-1	0			0		0	0	-1
TCGA-UT-A88C-01	MESO	0	0		0	0	0		1	0	0	0	1	-1	0	0	1		0	0	0	0	0
TCGA-UT-A88D-01	MESO		0	0	0	0	0	0	0			0	0	0	0	0	0	0	0	0	0	0	-1
TCGA-UT-A88E-01	MESO		0			0		0	0	-1			0		0	1	0			0		0	-1
TCGA-UT-A88G-01	MESO	0		1	-1		-1	1	1		-1	0	1	-1	-1	1	-1	-1	-1		1	0	-1
TCGA-UT-A97Y-01	MESO		0	0	-1	0	0	0	0			0	0	0	-1	0			0	0	0	0	-1
TCGA-XT-AASU-01	MESO		0		0			0	1	0		0	0	0	0	0	0		0	0	0
TCGA-YS-A95B-01	MESO		0	0	0	0	0	0	0		0		0	0	-1	1			0	0	0	0	-1
TCGA-YS-A95C-01	MESO		0	0	0	1	0	1	0	0	0	0	0	0	-1	0		0		0		0	-1
TCGA-YS-AA4M-01	MESO		0	0	0	0	0	0		0	0	0	0	-1	0	0	1		0	0	0	0	0
TCGA-ZN-A9VO-01	MESO	0	0		0			0				0	0	-1	0		0		0	0	0	0	-1
TCGA-ZN-A9VP-01	MESO		0		0		0	1		-1			0	0	-1	1	0		0			0
TCGA-ZN-A9VQ-01	MESO	0	0	0	0	0		0	0	0		0	0	0	0	0			0	0		0
TCGA-ZN-A9VS-01	MESO	0	0		-1	0		0	0		0	0	0	-1	-1	0	0		-1		0	0	-1
TCGA-ZN-A9VU-01	MESO	0	0	0	0	0		0	0	0	0		0	-1	0		0		0			0	-1
TCGA-ZN-A9VV-01	MESO	0	0	0	0	0	0	0	0		0	0	0	0	0	0	0	0	0	0	0	0	-1
TCGA-ZN-A9VW-01	MESO		0	0	0		0	0			-1	0	0		0		0	0	0	0	0	0	-1
TCGA-2J-AAB1-01	PAAD		0	0	0	0	-1	0	0	0	0	0	0	0	0	0	0	0	0	0	0	0	0
TCGA-2J-AAB4-01	PAAD			0	0	0		0		0	0		-1	0	0	0	0				0	0	0
TCGA-2J-AAB6-01	PAAD	1	0	1		0	0	1		0	0		0	1	1	0	0	0				0	0
TCGA-2J-AAB8-01	PAAD		0			0	0	0			0	0			-1	0	0			0	0	0	0
TCGA-2J-AAB9-01	PAAD	0	0	0	0	0	0	0	0	0	0	0	0	0	0	0	0	0	0	0	0	0	0
TCGA-2J-AABA-01	PAAD		0	0	0	0		0	0		-1	0	0	0	-1	0	0	0		0	0	0	0
TCGA-2J-AABE-01	PAAD			0	0	0		0			0	0	0	0	0	0	0			0	0	0	0
TCGA-2J-AABF-01	PAAD				0	0	0	0	0	-1	0	0		1		0	0		-1	0	0	0	-1
TCGA-2J-AABH-01	PAAD		0	0	0	0		0			0	0		1	0		0					0	-1
TCGA-2J-AABI-01	PAAD		0		0	0	-1	0	0			0		0	-1	0	0			-1	0	0	-1
TCGA-2J-AABO-01	PAAD				-1	-1	-1	0		-1	-1	0	0	0	1	1					0	-1
TCGA-2J-AABP-01	PAAD														0		-1			-1	1	-1
TCGA-2J-AABT-01	PAAD	0	0	0	0	0	0	1	0		0	0	0	1	0	-1	0			0		0	-1
TCGA-2J-AABU-01	PAAD	0			0		-1	0	0					0	0	0	0				0	-1	0
TCGA-2J-AABV-01	PAAD	0	0	0	0	0	0	0	0	0	0	0	0	0	0	0	0	0	0	0	0	0	0
TCGA-2L-AAQA-01	PAAD		0	0		0		0	0	0	0	0	0	0	0	0	0			0	0	0	0
TCGA-2L-AAQE-01	PAAD	0	1	1	0	1	-1	1			1	1			1	1				1		0	-1
TCGA-2L-AAQI-01	PAAD		0	0	0			0		-1	0	0		0	0		0		-1	0	0	0	0
TCGA-2L-AAQJ-01	PAAD		0		0	0	0	0			0	0			0	0	0			0		0	0
TCGA-2L-AAQL-01	PAAD		0		-1	-1	-1	0	-1		0	-1	0	1		0			-1	0	0	-1	-1
TCGA-2L-AAQM-01	PAAD	-1		-1	1	1	-1	1	-1	1	-1	-1	1	1	1	-1	-1	1	1	1	1	-1	-1
TCGA-3A-A9I5-01	PAAD		0			0	0	0		0	0	0		0	0	0	0		0	0	0	0	0
TCGA-3A-A9I7-01	PAAD	0	0	0	0	0	0		0	0	0	0	0	0	0	0	0			0	0	0	0
TCGA-3A-A9I9-01	PAAD	0		0							0	0			0		0
TCGA-3A-A9IB-01	PAAD	0	0			0	0	0		-1	0	0		-1	0					0		0	0
TCGA-3A-A9IC-01	PAAD		0				0	0		0		0	-1	-1	-1	0			0			0	0
TCGA-3A-A9IH-01	PAAD	0	0	0	0	0	-1	0		0	0	0	0	0	-1	0	0		-1		0	0	-1
TCGA-3A-A9IJ-01	PAAD	0	0	0	0	0	0	0	0	0	0	0	0	0	0	0	0	0	0	0	0	0	0
TCGA-3A-A9IL-01	PAAD	-1		0	0	1	-1	1	-1	0	-1	-1	1	1	0	1	-1	1	0	0	0	0	-1
TCGA-3A-A9IN-01	PAAD	0	0	0	1	1	0	1	0		0	0	1	0	1	0	0	1	1	1	1	0	0
TCGA-3A-A9IO-01	PAAD	0	0	-1	0	1	1	1	1	0	1	0	1	1	1	0	0	1	0	0	1	0	0
TCGA-3A-A9IR-01	PAAD	0	0	0	0	0	0	0			0	0	0	-1	0	0	0	0	0	0	0	0	0
TCGA-3A-A9IS-01	PAAD	-1			1	1	-1	0	1	0	-1	-1	1	0	0	-1	-1	0	0	0	1	-1	0
TCGA-3A-A9IU-01	PAAD		0	0	0	0		0	0		-1	0	0	0	0	0	0				0	0
TCGA-3A-A9IV-01	PAAD	-1		-1	1		-1	1	-1		-1	-1		1	1	-1	-1		1			-1	-1
TCGA-3A-A9IX-01	PAAD	0	0	0	0	0	0	0		0	0	0	0	0	0	0	0	0	0	0	0	0	0
TCGA-3A-A9IZ-01	PAAD		0		0									-1	0		0				0	-1	0
TCGA-3A-A9J0-01	PAAD		1	1	0	0	0	1	-1	-1	0	0	-1	1	1	1	1		-1		1	-1
TCGA-3E-AAAZ-01	PAAD		0	0	-1	0	-1	0	0	0	0	0	0	0	0	-1	0	0	-1	0	0	0	0
TCGA-F2-6879-01	PAAD	0	0	0	0	0		0			0	0		0	0		0	-1		0		0	-1
TCGA-F2-6880-01	PAAD	0	0	0	0	0	0	0	0	0	0	0	0	0	0	0	0	0	0	0	0	0	0
TCGA-F2-7273-01	PAAD	0	0	0	0	0	0	0	0	0	0	0	0	0	0	0	0	0	0	0	0	0	0
TCGA-F2-7276-01	PAAD	0	0	0	0	0	0	0	0	0	0	0	0	0	0	0	0	0	0	0	0	0	0
TCGA-F2-A44G-01	PAAD	0	0	0	0	0	0	0	0	-1	0		0	0	0	0	0			0	0	0	0
TCGA-F2-A44H-01	PAAD		0		0	0		0	0	-1	0	-1	0	0	0	0	0	0	-1	0	0	0	-1
TCGA-F2-A7TX-01	PAAD	0	0		0	0		0			0	0		0	0	0	-1		-1		0	-1	0
TCGA-F2-A8YN-01	PAAD	0	0	0	0	0		0			0	0	-1	0	0		0	-1			0	-1	0
TCGA-FB-A4P5-01	PAAD	0	0	0	0	0	0	0	0	0	0	0	0	0	0	0	0	0	0	0	0	0	0
TCGA-FB-A545-01	PAAD	0	1	0	0	-1		1	1		-1		0	0	1	-1				1	1	-1	1
TCGA-FB-A5VM-01	PAAD	0	0				0	0		0	0	0	0	0	-1	0			-1	0		0	0
TCGA-FB-A78T-01	PAAD		0	0	0	0	0	0	0		0		0	0	0	0	0		-1	0		0	-1
TCGA-FB-A7DR-01	PAAD				0				0		1				0	0			0			1	0
TCGA-FB-AAPP-01	PAAD		0	-1	0	0	-1	1	0	0		-1	0	-1	0	-1		-1	0	-1	1	-1	0
TCGA-FB-AAPQ-01	PAAD				0	0			0		0	0		0	0	0	0				0	0	0
TCGA-FB-AAPS-01	PAAD	0	0	0	0	0	0	0	0	0	0	0	0	0	0	0	0	0	0	0	0	0	0
TCGA-FB-AAPU-01	PAAD			0	0		0		0			0	0	0			0			0		0
TCGA-FB-AAPY-01	PAAD	0	0	0	0	0	0	0	0	-1	0	0		0	0	0	0				0	0	0
TCGA-FB-AAPZ-01	PAAD	0	1		0				-1				1		0	-1				1		0	-1
TCGA-FB-AAQ0-01	PAAD	0	0	0	0	0	0	0			0	0	0	0	0	-1	0			0	0	-1	-1
TCGA-FB-AAQ1-01	PAAD	1				1		1	1	-1	0	1		0	0	0	1		1	0		0	-1
TCGA-FB-AAQ2-01	PAAD	0	0	0	-1	0	-1	0			-1				0	-1	0			0	0	0	-1
TCGA-FB-AAQ3-01	PAAD		0	0	0	0		0			0	0	0	0	0	0	0			0	0
TCGA-FB-AAQ6-01	PAAD		0		0	0		0	0		0	0	0	0	0	0	0		-1	0	0	0	0
TCGA-FZ-5919-01	PAAD	0	0	0	0	0	-1		0	-1	0	0		0	0	0	0	-1	0	0	0	0	-1
TCGA-FZ-5920-01	PAAD		0		-1	0	-1	0	0		1			-1	0	-1	0	-1	-1			-1	-1
TCGA-FZ-5921-01	PAAD	0	0	0	0	0	-1	1	0	-1	0	-1	0	1	0		0	0		0	0	-1	1
TCGA-FZ-5922-01	PAAD		0		0	0		0	0	-1	0	0	0	0	0	0	0	0	0	0	0	0	0
TCGA-FZ-5923-01	PAAD		0	0	0	0	0	0	0	0		0	0	0	0	0	0	0		0	0	0	0
TCGA-FZ-5924-01	PAAD		1		1			1	1	-1				1	1	1	1		-1		1	-1
TCGA-FZ-5926-01	PAAD	0		0	0	-1	0	0		-1	-1	0	0	1	0	0	0	-1		-1		-1	0
TCGA-H6-8124-01	PAAD	0	0	0	0	0	-1		0	-1	-1	0		0	0	0	0	0			0	-1	0
TCGA-H6-A45N-01	PAAD	0	0	0	0	0	0	0	0	0	0	0	0	0	0	0	0		0	0	0	0	0
TCGA-H8-A6C1-01	PAAD					0		0	0	-1	0	0	0	0	0	0	0			0	0	0	0
TCGA-HV-A5A3-01	PAAD				0	0		0						0	0	-1	0					0	0
TCGA-HV-A5A4-01	PAAD		0	0	0	0	0	0	0	0	0	0		0	0	0		0		0	0	0	0
TCGA-HV-A5A6-01	PAAD	0	0	0							-1	0	0		-1	-1	0				0	-1	0
TCGA-HV-A7OL-01	PAAD	0	0	0	0	0	-1	0	0	0	0	0	0	0	0	0	0		-1		0	0	-1
TCGA-HV-A7OP-01	PAAD		0	0	-1		0	0	0	0	1	-1	-1	1	-1	-1	-1	0		0	0	-1	0
TCGA-HV-AA8X-01	PAAD				0	0		0	0			0		0	0	0	0			0	0	0	0
TCGA-HZ-7289-01	PAAD			0	0		-1	1			-1			-1	0			-1		0		0	0
TCGA-HZ-7918-01	PAAD							0		0		-1	0	-1	0							-1	0
TCGA-HZ-7919-01	PAAD	0	0	0	0	0	-1	0			0	0		0	0	0				0	0	-1	-1
TCGA-HZ-7920-01	PAAD	0	0	0	0	0	0	0	0	0	0	0	0	0	0	0	0	0	0	0	0	0	0
TCGA-HZ-7922-01	PAAD	0	0				-1	-1		-1	0	0		1	1	1	0		0		1	-1	1
TCGA-HZ-7924-01	PAAD	0	0	0	0	0	0	0	0	0	0	0	0	0	0	0	0	0	0	0	0	0	0
TCGA-HZ-7925-01	PAAD	0	0	-1	-1	0		0			0	0	0	0	0	0	0	0		0	0	1	0
TCGA-HZ-8002-01	PAAD	0	0	0	0	0	0	0	0	0	0	0	0	0	0	0	0	0	0	0	0	0	0
TCGA-HZ-8005-01	PAAD	-1	0		0	0		1		-1	-1	0	1	0	-1					-1		-1	-1
TCGA-HZ-8315-01	PAAD	0	0	0	0	0	-1	0		0	0	0	0	0	0	0	0		-1	0	0	0	0
TCGA-HZ-8317-01	PAAD	0	0	0	0	0	0	0	0	0	0	0	0	0	0	0	0	0	0	0	0	0	0
TCGA-HZ-8519-01	PAAD	0	0	0	0	0	0	0	0	0	0	0	0	0	0	0	0	0	0		0	0	0
TCGA-HZ-8636-01	PAAD		0	0		0	0	0			0	0		-1	0	-1	0	-1				-1	0
TCGA-HZ-8637-01	PAAD						0	0	0	-1	0		0	0	1	0	0			0	0		0
TCGA-HZ-8638-01	PAAD	0	0	0	0	0	0	0	0	0	0	0	0	0	0	0	0	0	0	0	0	0	0
TCGA-HZ-A49G-01	PAAD	0	0	0	0	0	0	0	0	0	0	0	0	0	0	0	0	0	0	0	0	0	0
TCGA-HZ-A49H-01	PAAD	0	0	0	0	0	0	0	0	0	0	0	0	0	0	0	0	0	0	0	0	0	0
TCGA-HZ-A49I-01	PAAD	0		0		0		0	0		0	0		0	0	0	0					0	0
TCGA-HZ-A4BH-01	PAAD		0	0		0	0	0			0			0	0	0	0		-1		0	-1
TCGA-HZ-A4BK-01	PAAD	1	1		0			0			1	0		-1	1	0			-1	1		0	0
TCGA-HZ-A77O-01	PAAD		1	0	1				1	-1	-1	1		1	1	1	1				1	0	-1
TCGA-HZ-A77P-01	PAAD	0		0	0	0	0	0			0		0	1	0	0			0	0	0	0	0
TCGA-HZ-A77Q-01	PAAD	0	0	0	0	0		0	0		0	0		0	0	0	0			0	0		0
TCGA-HZ-A8P0-01	PAAD		0	0	0	0	0	0	0			0	0	0	0	0	0	0				0	0
TCGA-HZ-A8P1-01	PAAD		0	-1	0	0	0	0			0	0	0	0	0	0	0	0		0	0	0	-1
TCGA-HZ-A9TJ-01	PAAD	1	1			0	1		0	0		0		1	0	0						0
TCGA-HZ-A9TJ-06	PAAD		1		-1	-1	0		0	0		0		1	0	0	0		-1			0
TCGA-IB-7644-01	PAAD	0	0	0	0	0		0	0	0	0	0	0	0	0	-1	0		-1	0	0	-1
TCGA-IB-7645-01	PAAD	0	0	0	0	0	0	0	0	0	0	0	0	0	0	0	0	0	0	0	0	0	0
[truncated: 8,524 more rows]

## Sheet: Amplifications
Cancer type-specific whole chromosome-level amplifications
Cancer type	Chromosome	X-squared	p.value	StdResidual	OddsRatio	p.adj
GBM	chr7	3194.69	0	56.6009	78.6797	0
COREAD	chr13	1051.22	1.32306e-230	32.4881	11.9924	1.86022e-227
COREAD	chr20	740.131	5.61432e-163	27.2847	11.7716	7.88251e-160
STAD	chr20	638.868	5.88964e-141	25.3686	12.5159	8.25728e-138
LGG	chr7	532.224	9.27037e-118	23.2148	12.7753	1.29785e-114
COREAD	chr7	528.869	4.97741e-117	23.0658	6.94815	6.96339e-114
KIRP	chr17	495.113	1.09957e-109	22.3457	12.2665	1.53719e-106
KIRP	chr7	468.946	5.43363e-104	21.7458	10.677	7.59079e-101
SKCM	chr7	458.427	1.05708e-101	21.4913	8.46787	1.47463e-98
OV	chr20	388.204	2.036e-86	19.7995	9.66085	2.83412e-83
BRCA	chr20	376.476	7.28291e-84	19.4683	4.70542	1.01232e-80
KIRC	chr5	367.54	6.42497e-82	19.2773	7.81053	8.92429e-79
GBM	chr20	309.553	2.73273e-69	17.67	5.02066	3.7903e-66
KIRP	chr16	305.325	2.27887e-68	17.5646	7.31297	3.15851e-65
TGCT	chr21	298.745	6.18322e-67	17.3942	14.9563	8.55758e-64
BLCA	chr20	267.896	3.26168e-60	16.4581	6.51841	4.50764e-57
STAD	chr8	259.93	1.77695e-58	16.234	7.54266	2.45397e-55
GBM	chr19	255.347	1.77312e-57	16.0629	4.9264	2.4469e-54
KIRC	chr7	248.67	5.06358e-56	15.8578	5.07513	6.98268e-53
TGCT	chr12	193.154	6.51389e-44	14.0804	78.9438	8.94357e-41
LUAD	chr7	180.902	3.07874e-41	13.5406	4.78649	4.21788e-38
TGCT	chr8	170.689	5.2309e-39	13.1958	11.0536	7.13495e-36
PRAD	chr7	150.025	1.71162e-34	12.4622	8.77872	2.33123e-31
TGCT	chr7	149.416	2.326e-34	12.3527	9.21192	3.16336e-31
SKCM	chr20	132.236	1.32864e-30	11.5763	3.53441	1.80163e-27
LUSC	chr20	129.28	5.88829e-30	11.4584	3.99146	7.97863e-27
ESCA	chr20	128.671	8.00387e-30	11.493	8.20947	1.08372e-26
UCEC	chr10	128.54	8.55182e-30	11.4546	4.45884	1.15706e-26
KIRP	chr12	123.274	1.21487e-28	11.1927	3.97237	1.64007e-25
LUSC	chr22	120.516	4.87645e-28	11.0551	3.41622	6.57346e-25
CESC	chr20	118.789	1.16496e-27	11.019	4.87139	1.5692e-24
STAD	chr13	100.813	1.01114e-23	10.1304	3.45067	1.34988e-20
HNSC	chr20	96.9115	7.24972e-23	9.9366	3.38699	9.64938e-20
UCEC	chr8	96.7157	8.00339e-23	9.95521	3.99675	1.06445e-19
LIHC	chr5	95.7876	1.27891e-22	9.9017	4.06848	1.6984e-19
BRCA	chr8	94.624	2.30213e-22	9.81504	3.12329	3.05493e-19
ACC	chr12	94.4102	2.56464e-22	9.85585	8.92525	3.39815e-19
UVM	chr8	93.5503	3.96012e-22	10.0137	14.7435	5.2432e-19
LIHC	chr7	88.8209	4.32224e-21	9.53704	3.86217	5.70968e-18
STAD	chr7	84.0929	4.72065e-20	9.27177	3.51351	6.20766e-17
LAML	chr8	83.0623	7.95087e-20	9.43979	10.6934	1.04395e-16
ACC	chr5	75.508	3.63935e-18	8.84101	8.37351	4.7348e-15
HNSC	chr8	66.3135	3.84615e-16	8.28081	3.99715	4.95769e-13
KIRC	chr12	65.0379	7.34705e-16	8.15205	2.70923	9.44095e-13
HNSC	chr14	62.1195	3.2323e-15	7.96691	2.66621	4.13734e-12
LIHC	chr20	61.5932	4.22285e-15	7.95438	3.13166	5.40102e-12
BRCA	chr7	61.305	4.88835e-15	7.8962	2.21212	6.24242e-12
KIRP	chr20	59.1296	1.47621e-14	7.7794	2.8136	1.88217e-11
BRCA	chr5	54.6838	1.41568e-13	7.46225	2.15334	1.79226e-10
LUSC	chr7	54.0541	1.95049e-13	7.4505	2.9022	2.46737e-10
KIRC	chr20	52.6218	4.04374e-13	7.34179	2.51544	5.1032e-10
OV	chr12	51.51	7.12347e-13	7.2868	3.11013	8.96845e-10
LUAD	chr20	49.3672	2.12266e-12	7.11721	2.60443	2.66606e-09
SKCM	chr8	47.8412	4.62178e-12	7.00253	2.49674	5.78185e-09
COREAD	chr8	45.5238	1.50794e-11	6.83744	2.5037	1.86985e-08
UCEC	chr20	43.1764	5.00203e-11	6.68417	2.74969	6.1625e-08
OV	chr7	43.158	5.04927e-11	6.68235	2.95081	6.21565e-08
ACC	chr19	40.2919	2.18719e-10	6.49161	4.43959	2.65307e-07
OV	chr3	39.5271	3.23535e-10	6.42962	3.47099	3.9083e-07
LUAD	chr5	39.3869	3.47624e-10	6.38486	2.72617	4.19235e-07
KIRC	chr16	31.7896	1.71813e-08	5.72656	2.14758	2.01022e-05
BLCA	chr3	31.4614	2.03449e-08	5.71586	2.50575	2.37221e-05
LUAD	chr8	30.952	2.64487e-08	5.6765	2.56044	3.06275e-05
BLCA	chr21	29.4666	5.68873e-08	5.51065	2.07835	6.51929e-05
HNSC	chr9	28.7014	8.44431e-08	5.4712	2.45465	9.62652e-05
ESCA	chr7	28.6064	8.86872e-08	5.52636	3.80435	0.000101015
CESC	chr1	27.7996	1.34553e-07	5.41504	2.87001	0.000152448
UCS	chr20	26.8236	2.22895e-07	5.44061	6.88144	0.000250534
ACC	chr20	26.7863	2.27244e-07	5.31671	3.38728	0.000255195
SKCM	chr22	26.1677	3.13021e-07	5.18862	1.87687	0.000349958
LGG	chr20	25.4527	4.53357e-07	5.18312	2.60236	0.000502773
KIRP	chr3	25.3144	4.87055e-07	5.12684	2.16494	0.000539657
LUAD	chr1	25.2211	5.11205e-07	5.14973	2.59699	0.000565903
UCEC	chr2	24.9089	6.0105e-07	5.10595	2.31079	0.000663559
BLCA	chr7	24.6951	6.7154e-07	5.06563	2.15747	0.000739366
BRCA	chr21	24.4886	7.47498e-07	5.0073	1.64102	0.000820753
ACC	chr16	24.0823	9.23046e-07	5.05139	3.27192	0.00101074
PCPG	chr7	23.7095	1.12027e-06	5.10171	3.88261	0.00122445
DLBC	chr18	21.8579	2.93601e-06	4.96491	5.33654	0.00315621
LGG	chr19	21.7252	3.14634e-06	4.85165	3.0468	0.00337288
THCA	chr7	21.1344	4.28165e-06	4.86116	3.96231	0.00452999
PAAD	chr7	20.1956	6.99146e-06	4.657	2.83553	0.00733404
ESCA	chr8	17.4977	2.87652e-05	4.38605	3.41909	0.0289953
UVM	chr21	17.1918	3.3789e-05	4.3864	3.66673	0.0338904
SKCM	chr13	16.895	3.95062e-05	4.18312	1.68265	0.0394667
MESO	chr7	16.8752	3.99206e-05	4.36129	3.86387	0.0398407

## Sheet: Deletions
Cancer type-specific whole chromosome-level deletions
Cancer type	Chromosome	X-squared	p.value	StdResidual	OddsRatio	p.adj
GBM	chr10	3148.93	0	56.1892	101.258	0
COREAD	chr18	798.854	9.57559e-176	28.3251	10.4463	1.34537e-172
THCA	chr22	658.608	2.99976e-145	25.8641	23.7057	4.20866e-142
UVM	chr3	541.443	9.15302e-120	23.5929	108.789	1.28234e-116
KIRC	chr14	461.129	2.73069e-102	21.5568	7.14577	3.81204e-99
BRCA	chr22	415.36	2.49637e-92	20.4248	3.915	3.47994e-89
SKCM	chr9	397.775	1.68009e-88	20.0244	8.64106	2.34037e-85
SKCM	chr10	384.661	1.20283e-85	19.6845	6.94022	1.67313e-82
OV	chr22	338.877	1.12047e-75	18.4618	8.91149	1.55521e-72
BRCA	chr13	300.648	2.38039e-67	17.3839	3.30833	3.29683e-64
LUSC	chr13	282.311	2.35522e-63	16.8624	5.92879	3.25727e-60
PRAD	chr13	240.013	3.90775e-54	15.6717	9.29497	5.38488e-51
STAD	chr21	209.487	1.77708e-47	14.5434	4.32315	2.44704e-44
MESO	chr22	207.009	6.17207e-47	14.5546	26.5054	8.49277e-44
KIRC	chr3	204.816	1.85776e-46	14.4848	10.6109	2.55442e-43
PCPG	chr3	199.264	3.02376e-45	14.3039	11.5142	4.15465e-42
SARC	chr13	183.592	7.96605e-42	13.6596	7.33551	1.09294e-38
LUSC	chr9	182.633	1.28999e-41	13.5897	5.99942	1.76858e-38
LGG	chr10	179.02	7.93121e-41	13.5055	5.55916	1.08499e-37
LUSC	chr4	175.873	3.85929e-40	13.3305	4.9084	5.27565e-37
OV	chr17	172.301	2.32657e-39	13.1995	8.94172	3.1781e-36
LUAD	chr13	170.882	4.74941e-39	13.1285	3.50521	6.48294e-36
TGCT	chr18	155.39	1.15079e-35	12.5564	11.6745	1.56852e-32
COREAD	chr15	149.987	1.74526e-34	12.3057	3.0277	2.3753e-31
TGCT	chr11	141.855	1.0462e-32	12.0068	12.6632	1.42178e-29
TGCT	chr13	139.092	4.20579e-32	11.8817	8.5748	5.71146e-29
HNSC	chr13	135.316	2.81611e-31	11.707	3.47061	3.82146e-28
HNSC	chr21	121.395	3.13165e-28	11.0878	3.12218	4.2246e-25
KIRC	chr9	114.34	1.09801e-26	10.7759	3.29532	1.47793e-23
UCEC	chr22	114.249	1.14931e-26	10.783	3.58834	1.54582e-23
COREAD	chr14	112.686	2.52807e-26	10.6728	2.6258	3.39773e-23
PCPG	chr22	110.265	8.57457e-26	10.659	6.22326	1.15071e-22
LAML	chr7	108.457	2.13405e-25	10.8455	18.5178	2.86176e-22
GBM	chr22	108.289	2.32266e-25	10.4777	2.90151	3.11237e-22
STAD	chr4	107.619	3.25788e-25	10.4514	3.33728	4.3623e-22
TGCT	chr4	102.213	4.98657e-24	10.2077	7.57107	6.66705e-21
TGCT	chr5	102.176	5.08078e-24	10.2026	6.89655	6.78792e-21
GBM	chr13	100.277	1.32527e-23	10.0886	2.90793	1.76792e-20
LUSC	chr21	100.133	1.42495e-23	10.064	2.7707	1.89946e-20
BLCA	chr9	99.4285	2.03374e-23	10.0587	3.74841	2.70894e-20
COREAD	chr22	94.6024	2.32731e-22	9.78366	2.44807	3.08601e-19
LUAD	chr15	92.5189	6.66838e-22	9.67593	2.60827	8.82227e-19
LUAD	chr9	89.9738	2.41337e-21	9.55175	2.94224	3.19047e-18
GBM	chr14	85.9989	1.80035e-20	9.34669	2.69205	2.37286e-17
KICH	chr1	85.0073	2.97267e-20	9.36811	12.0741	3.91501e-17
KICH	chr6	84.6713	3.52322e-20	9.34539	10.8252	4.63656e-17
CESC	chr4	83.9422	5.09465e-20	9.26851	3.82425	6.69437e-17
OV	chr16	78.7465	7.06151e-19	8.94865	3.86076	9.24352e-16
LGG	chr13	78.5408	7.83639e-19	8.97995	3.55945	1.025e-15
COREAD	chr21	76.4837	2.22039e-18	8.80307	2.27482	2.89761e-15
KICH	chr17	74.4243	6.30084e-18	8.77064	9.01852	8.18479e-15
PRAD	chr18	74.3723	6.46916e-18	8.7945	4.70878	8.39697e-15
ESCA	chr21	71.9693	2.18572e-17	8.58145	4.14086	2.83488e-14
KICH	chr10	71.9333	2.226e-17	8.62612	8.80346	2.8849e-14
SARC	chr10	70.0915	5.66152e-17	8.48913	4.0832	7.32601e-14
UCEC	chr15	67.5481	2.05612e-16	8.3138	2.89914	2.65445e-13
KICH	chr2	67.1058	2.57321e-16	8.33658	8.07615	3.31945e-13
OV	chr4	65.3395	6.30457e-16	8.15382	3.12832	8.10767e-13
LIHC	chr13	64.8013	8.28461e-16	8.14346	3.00237	1.06374e-12
COREAD	chr4	57.774	2.94028e-14	7.6625	2.16172	3.74004e-11
STAD	chr22	50.2086	1.38241e-12	7.15632	2.26361	1.73908e-09
HNSC	chr4	49.4684	2.01591e-12	7.11894	2.52109	2.53399e-09
LGG	chr14	48.2826	3.69011e-12	7.06764	2.95418	4.62371e-09
PCPG	chr11	47.8685	4.55789e-12	7.09575	4.3618	5.70647e-09
KIRP	chr14	46.7626	8.01282e-12	6.96689	3.1734	9.99198e-09
LUAD	chr22	46.6837	8.34212e-12	6.88974	2.01578	1.03943e-08
MESO	chr14	46.4804	9.25402e-12	6.9751	4.74196	1.1512e-08
OV	chr13	46.324	1.0023e-11	6.86083	2.07707	1.24586e-08
BLCA	chr15	44.9697	2.0011e-11	6.77671	2.21981	2.47536e-08
LIHC	chr9	44.7575	2.23015e-11	6.78093	2.53503	2.75647e-08
BLCA	chr22	44.272	2.85778e-11	6.72752	2.2699	3.52936e-08
SKCM	chr11	42.5301	6.96023e-11	6.60229	2.34131	8.5402e-08
KICH	chr13	42.1053	8.64896e-11	6.63149	4.98565	1.06036e-07
KIRC	chr6	41.8298	9.95754e-11	6.55435	2.32237	1.21781e-07
PAAD	chr6	41.454	1.20679e-10	6.58575	3.67812	1.47228e-07
KIRP	chr22	41.0171	1.50905e-10	6.5337	3.02359	1.83953e-07
MESO	chr13	40.733	1.74514e-10	6.54902	4.67062	2.12384e-07
ACC	chr22	40.0293	2.50184e-10	6.45472	3.96243	3.02973e-07
SKCM	chr14	39.6928	2.97215e-10	6.36651	2.01948	3.59333e-07
LIHC	chr21	39.122	3.98125e-10	6.33751	2.27381	4.79741e-07
BRCA	chr15	38.4096	5.73509e-10	6.24328	1.65186	6.89931e-07
CESC	chr11	37.965	7.20235e-10	6.28126	2.93672	8.65002e-07
PAAD	chr18	37.5103	9.09303e-10	6.29301	3.97674	1.08844e-06
ESCA	chr4	33.4999	7.1267e-09	5.90853	3.3361	8.39525e-06
THYM	chr6	33.4764	7.21325e-09	6.02952	4.86747	8.48999e-06
KIRP	chr18	30.2258	3.84563e-08	5.62819	2.7137	4.43402e-05
PAAD	chr21	29.8768	4.60378e-08	5.59227	2.80611	5.29435e-05
ACC	chr13	29.8431	4.68464e-08	5.59002	3.30988	5.38265e-05
BRCA	chr18	29.3883	5.92345e-08	5.46837	1.58178	6.77643e-05
PCPG	chr21	29.0867	6.92116e-08	5.54726	3.11544	7.90396e-05
BRCA	chr17	28.338	1.01877e-07	5.38587	1.77931	0.000115631
LIHC	chr4	27.2761	1.7638e-07	5.32108	2.2527	0.000199486
BLCA	chr14	27.0903	1.94166e-07	5.27657	1.91137	0.000219019
UCEC	chr13	26.3347	2.8709e-07	5.22552	2.0977	0.000321541
UCS	chr15	26.2177	3.05007e-07	5.30009	6.07853	0.000341303
OV	chr18	25.6694	4.05205e-07	5.13312	1.94575	0.000449778
PAAD	chr22	23.5869	1.194e-06	4.98644	2.61388	0.00130385
LIHC	chr14	23.242	1.42842e-06	4.90908	2.00831	0.00155555
BRCA	chr14	22.6554	1.93814e-06	4.80495	1.47983	0.00210095
PAAD	chr9	22.3851	2.23104e-06	4.89032	2.98829	0.00240952
CHOL	chr13	22.276	2.36135e-06	4.96888	5.29762	0.00254553
LUAD	chr18	21.65	3.27217e-06	4.71786	1.73979	0.00350449
LUSC	chr10	21.4226	3.68406e-06	4.69947	1.83471	0.00392352
HNSC	chr18	21.1861	4.1677e-06	4.69402	1.9937	0.00441776
BLCA	chr4	21.0082	4.57325e-06	4.66659	1.93065	0.00483392
HNSC	chr11	20.6315	5.56737e-06	4.63492	1.99777	0.00585688
BRCA	chr4	20.092	7.3805e-06	4.52982	1.47346	0.00772738
CESC	chr13	19.9362	8.00711e-06	4.57008	2.13268	0.00835942
LUAD	chr19	19.8635	8.31746e-06	4.52746	1.77767	0.00867511
KIRP	chr21	19.8359	8.43841e-06	4.58167	2.32794	0.00879282
CHOL	chr9	19.8012	8.59265e-06	4.73639	5.85714	0.00894495
OV	chr15	19.5001	1.00592e-05	4.47343	1.65177	0.0103911
MESO	chr4	19.3856	1.06809e-05	4.57971	3.31939	0.011012
UCEC	chr9	18.8331	1.42671e-05	4.43883	1.96945	0.0146238
STAD	chr14	18.8079	1.4457e-05	4.40929	1.73312	0.0148039
STAD	chr18	18.5939	1.61739e-05	4.39794	1.88161	0.0165297
ACC	chr18	18.4694	1.72653e-05	4.42768	2.67864	0.0176106

## Sheet: Co-amplified chromosomes
Frequently Co-amplified chromosomes
Cancer.Type	Aneuploidchr	Coamplifiedchr	p.value	StdResidual	p.adj
THCA	chr7	chr16	3.2677e-57	16.9111	4.41466e-54
THCA	chr7	chr5	3.82149e-49	15.7521	5.15901e-46
KIRC	chr12	chr20	5.46661e-34	12.3182	7.37446e-31
KIRC	chr20	chr12	5.46661e-34	12.3182	7.37446e-31
KIRC	chr20	chr19	1.53703e-29	11.5304	2.07038e-26
THCA	chr7	chr20	2.06805e-27	12.0981	2.7836e-24
KIRC	chr7	chr20	2.52315e-26	10.7552	3.39363e-23
KIRC	chr20	chr7	2.52315e-26	10.7552	3.39363e-23
KIRC	chr16	chr20	2.57404e-26	10.787	3.45694e-23
KIRC	chr20	chr16	2.57404e-26	10.787	3.45694e-23
BRCA	chr5	chr12	3.84733e-26	10.7867	5.15927e-23
GBM	chr19	chr20	7.88741e-24	10.1808	1.05691e-20
GBM	chr20	chr19	7.88741e-24	10.1808	1.05691e-20
KIRP	chr7	chr17	1.94519e-23	10.1138	2.60266e-20
KIRP	chr17	chr7	1.94519e-23	10.1138	2.60266e-20
KIRC	chr20	chr21	4.69474e-23	10.126	6.27217e-20
COREAD	chr13	chr20	7.46442e-22	9.71589	9.96499e-19
COREAD	chr20	chr13	7.46442e-22	9.71589	9.96499e-19
BRCA	chr5	chr20	8.17938e-22	9.72665	1.09031e-18
BRCA	chr20	chr5	8.17938e-22	9.72665	1.09031e-18
KIRC	chr7	chr16	1.51771e-21	9.68431	2.02008e-18
KIRC	chr16	chr7	1.51771e-21	9.68431	2.02008e-18
THCA	chr7	chr19	1.61435e-21	10.9408	2.14547e-18
BRCA	chr20	chr12	1.63336e-21	9.69174	2.1691e-18
KIRC	chr12	chr19	1.50759e-20	9.52881	2.00057e-17
KIRC	chr7	chr12	5.11256e-20	9.29935	6.77926e-17
KIRC	chr12	chr7	5.11256e-20	9.29935	6.77926e-17
KIRC	chr12	chr16	5.30429e-20	9.33034	7.02289e-17
KIRC	chr16	chr12	5.30429e-20	9.33034	7.02289e-17
BRCA	chr7	chr20	4.36761e-19	9.05161	5.77398e-16
BRCA	chr20	chr7	4.36761e-19	9.05161	5.77398e-16
BRCA	chr21	chr6	9.00724e-19	9.12839	1.18896e-15
LGG	chr20	chr17	1.50462e-18	9.52246	1.9846e-15
PRAD	chr7	chr21	1.86014e-18	9.33823	2.45166e-15
KIRC	chr16	chr19	1.41186e-17	8.79028	1.85942e-14
THCA	chr7	chr17	1.42803e-17	9.53887	1.87929e-14
UCEC	chr2	chr7	3.82792e-17	8.78829	5.03372e-14
THCA	chr7	chr14	7.19382e-17	9.59524	9.45269e-14
UCEC	chr20	chr21	1.21728e-16	8.67242	1.59829e-13
LGG	chr7	chr20	1.54258e-16	8.4898	2.02386e-13
LGG	chr20	chr7	1.54258e-16	8.4898	2.02386e-13
BRCA	chr7	chr19	1.58399e-16	8.46962	2.07503e-13
KIRC	chr16	chr22	1.77971e-16	8.50662	2.32964e-13
BRCA	chr5	chr19	1.80855e-16	8.44741	2.36559e-13
KIRC	chr5	chr20	2.00968e-16	8.36963	2.62666e-13
KIRC	chr20	chr5	2.00968e-16	8.36963	2.62666e-13
BRCA	chr20	chr19	6.37568e-16	8.25856	8.32027e-13
KIRC	chr5	chr12	6.89056e-16	8.21818	8.98529e-13
KIRC	chr12	chr5	6.89056e-16	8.21818	8.98529e-13
KIRC	chr16	chr2	7.38268e-16	8.28829	9.61225e-13
COREAD	chr7	chr13	7.52795e-16	8.15496	9.79386e-13
COREAD	chr13	chr7	7.52795e-16	8.15496	9.79386e-13
KIRC	chr20	chr2	9.05593e-16	8.24495	1.17636e-12
KIRP	chr3	chr16	9.5667e-16	8.18318	1.24176e-12
KIRP	chr16	chr3	9.5667e-16	8.18318	1.24176e-12
COREAD	chr7	chr20	1.7535e-15	8.07207	2.27254e-12
COREAD	chr20	chr7	1.7535e-15	8.07207	2.27254e-12
LUSC	chr20	chr22	1.76275e-15	8.09852	2.281e-12
LUSC	chr22	chr20	1.76275e-15	8.09852	2.281e-12
SKCM	chr7	chr20	3.15581e-15	8.01048	4.07731e-12
SKCM	chr20	chr7	3.15581e-15	8.01048	4.07731e-12
BRCA	chr20	chr21	1.4668e-14	7.83015	1.89217e-11
BRCA	chr21	chr20	1.4668e-14	7.83015	1.89217e-11
KIRC	chr20	chr17	1.48231e-14	8.00108	1.90921e-11
SKCM	chr20	chr15	1.50865e-14	7.85779	1.94163e-11
KIRC	chr20	chr22	1.61753e-14	7.93792	2.08015e-11
KIRC	chr20	chr11	2.19992e-14	7.98675	2.8269e-11
HNSC	chr20	chr16	4.04483e-14	7.85642	5.19356e-11
SKCM	chr20	chr21	5.60181e-14	7.68299	7.18712e-11
BRCA	chr8	chr20	8.47437e-14	7.61507	1.08641e-10
BRCA	chr20	chr8	8.47437e-14	7.61507	1.08641e-10
KIRC	chr16	chr17	1.29053e-13	7.74751	1.65188e-10
BRCA	chr7	chr8	2.01421e-13	7.51384	2.57617e-10
BRCA	chr8	chr7	2.01421e-13	7.51384	2.57617e-10
KIRC	chr12	chr21	2.77938e-13	7.53933	3.54927e-10
SKCM	chr20	chr22	3.06947e-13	7.43467	3.91664e-10
SKCM	chr22	chr20	3.06947e-13	7.43467	3.91664e-10
LGG	chr20	chr21	3.59315e-13	7.82133	4.57767e-10
KIRC	chr12	chr2	8.58126e-13	7.35134	1.09239e-09
KIRC	chr7	chr19	8.67079e-13	7.35369	1.10293e-09
PCPG	chr7	chr19	9.58981e-13	7.68521	1.21886e-09
UCEC	chr20	chr6	1.36011e-12	7.49329	1.72733e-09
KIRP	chr16	chr17	4.64313e-12	7.04983	5.88837e-09
KIRP	chr17	chr16	4.64313e-12	7.04983	5.88837e-09
BRCA	chr20	chr16	4.64016e-12	7.14679	5.88837e-09
KIRC	chr7	chr2	4.67204e-12	7.08961	5.9148e-09
BRCA	chr20	chr14	1.11409e-11	6.9488	1.40932e-08
LGG	chr20	chr5	1.32781e-11	7.59046	1.67835e-08
UCEC	chr20	chr12	1.53009e-11	7.17059	1.93251e-08
PAAD	chr7	chr20	1.73264e-11	7.16069	2.18659e-08
KIRC	chr12	chr22	1.75663e-11	6.97634	2.21511e-08
BLCA	chr20	chr21	3.17173e-11	6.79217	3.99638e-08
BLCA	chr21	chr20	3.17173e-11	6.79217	3.99638e-08
BRCA	chr5	chr7	4.76203e-11	6.73487	5.99064e-08
BRCA	chr7	chr5	4.76203e-11	6.73487	5.99064e-08
KIRC	chr5	chr7	5.98036e-11	6.67391	7.51134e-08
KIRC	chr7	chr5	5.98036e-11	6.67391	7.51134e-08
BRCA	chr21	chr19	7.25345e-11	6.75847	9.09583e-08
UCEC	chr2	chr6	7.61981e-11	6.92346	9.54763e-08
UCEC	chr8	chr3	9.11182e-11	6.86538	1.1408e-07
LIHC	chr20	chr22	1.37984e-10	6.66686	1.72618e-07
LGG	chr20	chr2	1.55837e-10	7.187	1.94796e-07
KIRC	chr16	chr11	1.64558e-10	6.77159	2.05533e-07
SKCM	chr8	chr20	1.70891e-10	6.53659	2.13272e-07
SKCM	chr20	chr8	1.70891e-10	6.53659	2.13272e-07
KIRC	chr5	chr16	1.8675e-10	6.53673	2.32691e-07
KIRC	chr16	chr5	1.8675e-10	6.53673	2.32691e-07
SKCM	chr20	chr2	2.23755e-10	6.55213	2.78351e-07
UCEC	chr8	chr6	2.30479e-10	6.79108	2.86485e-07
PRAD	chr7	chr14	2.60611e-10	7.10095	3.23679e-07
BRCA	chr21	chr12	3.03474e-10	6.51107	3.76611e-07
COREAD	chr7	chr16	4.87889e-10	6.36702	6.04983e-07
LGG	chr19	chr20	7.60519e-10	6.55561	9.42283e-07
LGG	chr20	chr19	7.60519e-10	6.55561	9.42283e-07
LUAD	chr1	chr21	8.33949e-10	6.43782	1.0316e-06
KIRC	chr12	chr15	9.53471e-10	6.43991	1.17849e-06
BRCA	chr21	chr10	9.67316e-10	6.45415	1.19464e-06
KIRC	chr20	chr15	1.1237e-09	6.41221	1.38665e-06
LUSC	chr20	chr15	1.1323e-09	6.29333	1.39612e-06
SKCM	chr13	chr20	1.38855e-09	6.19508	1.7107e-06
SKCM	chr20	chr13	1.38855e-09	6.19508	1.7107e-06
LUSC	chr7	chr20	1.61779e-09	6.223	1.98988e-06
LUSC	chr20	chr7	1.61779e-09	6.223	1.98988e-06
BRCA	chr5	chr8	1.67484e-09	6.19878	2.0567e-06
BRCA	chr8	chr5	1.67484e-09	6.19878	2.0567e-06
KIRC	chr12	chr17	1.96073e-09	6.30108	2.40385e-06
HNSC	chr20	chr13	3.10892e-09	6.21155	3.80843e-06
UCEC	chr2	chr1	3.19005e-09	6.85109	3.90462e-06
UCEC	chr20	chr13	3.28351e-09	6.39203	4.01573e-06
KIRC	chr5	chr2	4.12791e-09	6.06742	5.04431e-06
PAAD	chr7	chr14	5.24708e-09	6.16058	6.40668e-06
LIHC	chr20	chr15	6.37953e-09	6.12329	7.78303e-06
KIRC	chr7	chr22	6.7873e-09	6.01081	8.27372e-06
PCPG	chr7	chr15	8.34269e-09	6.29157	1.01614e-05
LGG	chr20	chr9	9.19008e-09	6.65059	1.11843e-05
BRCA	chr7	chr18	1.03593e-08	5.93841	1.25969e-05
BRCA	chr7	chr14	1.24877e-08	5.89839	1.51725e-05
UCEC	chr2	chr13	1.34785e-08	6.20023	1.63629e-05
KIRP	chr7	chr16	1.48816e-08	5.78986	1.80514e-05
KIRP	chr16	chr7	1.48816e-08	5.78986	1.80514e-05
BRCA	chr21	chr2	1.69505e-08	6.05304	2.0527e-05
LUSC	chr20	chr19	1.94594e-08	5.89277	2.35459e-05
SKCM	chr7	chr15	2.12036e-08	5.76647	2.56351e-05
LIHC	chr20	chr19	2.32902e-08	5.91416	2.81346e-05
LIHC	chr7	chr20	2.53249e-08	5.76387	3.05671e-05
LIHC	chr20	chr7	2.53249e-08	5.76387	3.05671e-05
BRCA	chr7	chr21	2.64524e-08	5.72796	3.18751e-05
BRCA	chr21	chr7	2.64524e-08	5.72796	3.18751e-05
SKCM	chr22	chr2	2.70247e-08	5.78282	3.25108e-05
UCEC	chr2	chr20	2.83891e-08	5.87324	3.41237e-05
UCEC	chr20	chr2	2.83891e-08	5.87324	3.41237e-05
LUAD	chr7	chr20	3.04306e-08	5.73244	3.65168e-05
LUAD	chr20	chr7	3.04306e-08	5.73244	3.65168e-05
HNSC	chr14	chr22	3.1548e-08	5.72174	3.77945e-05
BRCA	chr7	chr3	3.22398e-08	5.8002	3.8591e-05
SKCM	chr22	chr21	3.58258e-08	5.68711	4.28477e-05
BLCA	chr20	chr13	4.02482e-08	5.66939	4.80966e-05
KIRC	chr5	chr21	4.14831e-08	5.69672	4.95308e-05
UCEC	chr2	chr22	4.23002e-08	6.17932	5.04641e-05
PCPG	chr7	chr12	4.61117e-08	6.0543	5.49651e-05
UCEC	chr20	chr3	5.26501e-08	5.94623	6.27062e-05
UCEC	chr8	chr20	5.85526e-08	5.72422	6.96776e-05
UCEC	chr20	chr8	5.85526e-08	5.72422	6.96776e-05
SKCM	chr20	chr16	6.75381e-08	5.63561	8.02353e-05
STAD	chr7	chr20	7.50129e-08	5.53188	8.90404e-05
STAD	chr20	chr7	7.50129e-08	5.53188	8.90404e-05
LUSC	chr20	chr12	8.20572e-08	5.59192	9.72377e-05
KIRC	chr12	chr11	8.8223e-08	5.6909	0.000104456
BRCA	chr20	chr17	8.82738e-08	5.67279	0.000104456
SKCM	chr22	chr14	9.20637e-08	5.59983	0.000108819
LIHC	chr20	chr6	9.88921e-08	5.6739	0.000116792
SKCM	chr20	chr14	1.09411e-07	5.55501	0.000129105
LUSC	chr20	chr2	1.17107e-07	5.55321	0.000138069
KIRC	chr7	chr11	1.29788e-07	5.56621	0.000152891
COREAD	chr20	chr16	1.50949e-07	5.42559	0.000177667
LUSC	chr22	chr18	1.55627e-07	5.44803	0.000183018
LUSC	chr7	chr15	1.56347e-07	5.45959	0.000183708
UCEC	chr20	chr5	1.61423e-07	6.08067	0.000189511
BLCA	chr21	chr1	1.67663e-07	5.67595	0.000196668
BRCA	chr7	chr9	1.74543e-07	5.48744	0.000204565
LIHC	chr7	chr15	1.77922e-07	5.50656	0.000208346
GBM	chr20	chr5	1.9145e-07	5.44727	0.000223997
THCA	chr7	chr13	2.02762e-07	7.02332	0.000237028
KIRP	chr3	chr17	2.21119e-07	5.33838	0.000258267
KIRP	chr17	chr3	2.21119e-07	5.33838	0.000258267
LUSC	chr22	chr19	2.38729e-07	5.42761	0.000278358
UCEC	chr8	chr7	2.46234e-07	5.45311	0.000286862
BRCA	chr20	chr18	2.46422e-07	5.34106	0.000286862
KIRP	chr17	chr20	2.49842e-07	5.30099	0.000290567
KIRP	chr20	chr17	2.49842e-07	5.30099	0.000290567
KIRP	chr3	chr7	2.60998e-07	5.30241	0.000303019
KIRP	chr7	chr3	2.60998e-07	5.30241	0.000303019
KIRP	chr3	chr2	2.68212e-07	5.38266	0.000310858
LIHC	chr20	chr10	2.73434e-07	5.50485	0.000316637
LUSC	chr7	chr22	2.7703e-07	5.30795	0.000320524
LUSC	chr22	chr7	2.7703e-07	5.30795	0.000320524
COREAD	chr13	chr16	2.7913e-07	5.2715	0.000322395
LUAD	chr1	chr7	2.79888e-07	5.37329	0.00032299
LUAD	chr7	chr1	2.79888e-07	5.37329	0.00032299
CESC	chr1	chr19	2.97131e-07	5.47138	0.000341966
UCEC	chr2	chr8	2.96846e-07	5.401	0.000341966
UCEC	chr8	chr2	2.96846e-07	5.401	0.000341966
LUSC	chr7	chr12	3.26315e-07	5.35018	0.000374936
BLCA	chr3	chr13	3.62201e-07	5.32907	0.000415806
LGG	chr20	chr15	3.63293e-07	5.90846	0.000416697
KIRC	chr16	chr15	3.71829e-07	5.44008	0.000426116
KIRP	chr7	chr20	3.98477e-07	5.20656	0.000456256
KIRP	chr20	chr7	3.98477e-07	5.20656	0.000456256
BRCA	chr5	chr14	4.03704e-07	5.25715	0.000461434
SKCM	chr13	chr15	4.10194e-07	5.25948	0.000468442
BRCA	chr5	chr4	4.26738e-07	5.38661	0.000486908
BRCA	chr8	chr19	4.29611e-07	5.27739	0.000489756
BRCA	chr8	chr9	4.37116e-07	5.31555	0.000497876
LGG	chr20	chr22	4.74655e-07	5.68883	0.000540157
BRCA	chr21	chr14	4.77472e-07	5.2279	0.000542885
STAD	chr7	chr2	4.89393e-07	5.34939	0.000555951
BLCA	chr3	chr21	5.52623e-07	5.20651	0.000627228
BLCA	chr21	chr3	5.52623e-07	5.20651	0.000627228
KIRC	chr16	chr21	5.53905e-07	5.26396	0.000627574
PAAD	chr7	chr13	5.56017e-07	5.34262	0.000629411
THCA	chr7	chr21	5.76608e-07	6.76299	0.000652144
PCPG	chr7	chr6	5.96396e-07	5.54614	0.000673927
LIHC	chr20	chr21	6.21828e-07	5.31614	0.000702044
SKCM	chr13	chr21	6.41518e-07	5.15711	0.000723632
PRAD	chr7	chr12	6.52261e-07	5.78368	0.000735098
LUSC	chr7	chr19	6.82072e-07	5.25434	0.000768013
BRCA	chr20	chr4	7.06734e-07	5.23704	0.000795076
LUSC	chr22	chr15	7.40247e-07	5.12018	0.000832038
BLCA	chr3	chr19	7.44851e-07	5.26398	0.000836468
PAAD	chr7	chr2	8.00672e-07	5.36594	0.000898354
PAAD	chr7	chr5	8.29298e-07	5.47892	0.000929643
SKCM	chr20	chr17	8.51151e-07	5.20806	0.000953289
LUSC	chr7	chr18	8.59986e-07	5.20344	0.000962324
BRCA	chr5	chr9	9.8395e-07	5.14898	0.00110006
BRCA	chr7	chr12	1.03539e-06	5.08506	0.00115653
BLCA	chr7	chr20	1.16581e-06	5.03318	0.00130104
BLCA	chr20	chr7	1.16581e-06	5.03318	0.00130104
SKCM	chr13	chr6	1.20088e-06	5.18786	0.00133778
KIRP	chr16	chr20	1.20746e-06	4.98925	0.00134391
KIRP	chr20	chr16	1.20746e-06	4.98925	0.00134391
BLCA	chr21	chr17	1.24863e-06	5.23418	0.00138723
SKCM	chr20	chr3	1.25056e-06	5.07513	0.00138813
SKCM	chr7	chr21	1.26927e-06	4.99645	0.00140762
LIHC	chr5	chr20	1.28717e-06	5.04085	0.00142618
LIHC	chr20	chr5	1.28717e-06	5.04085	0.00142618
BRCA	chr20	chr13	1.28834e-06	5.04085	0.00142618
LUAD	chr5	chr21	1.38098e-06	5.09374	0.00152599
SKCM	chr7	chr22	1.45529e-06	4.95419	0.00160664
SKCM	chr22	chr7	1.45529e-06	4.95419	0.00160664
BRCA	chr8	chr18	1.4951e-06	5.08308	0.00164759
SKCM	chr22	chr16	1.50988e-06	5.08113	0.00166238
BLCA	chr3	chr17	1.55019e-06	5.27973	0.00170486
BLCA	chr7	chr16	1.54988e-06	5.13415	0.00170486
BRCA	chr21	chr18	1.56798e-06	5.03916	0.00172164
BLCA	chr3	chr20	1.60596e-06	4.98493	0.00176174
BLCA	chr20	chr3	1.60596e-06	4.98493	0.00176174
BRCA	chr5	chr16	1.68976e-06	5.20497	0.00185029
BLCA	chr7	chr21	1.93611e-06	4.96248	0.00211811
BLCA	chr21	chr7	1.93611e-06	4.96248	0.00211811
LIHC	chr20	chr11	2.04502e-06	5.1671	0.00223316
HNSC	chr14	chr16	2.0588e-06	5.01451	0.00224615
SKCM	chr20	chr18	2.28122e-06	4.95185	0.00248653
OV	chr20	chr2	2.31268e-06	4.94154	0.00251851
LUSC	chr20	chr6	2.33305e-06	5.01768	0.00253835
KIRP	chr7	chr12	2.34802e-06	4.85073	0.0025523
KIRP	chr12	chr7	2.34802e-06	4.85073	0.0025523
PCPG	chr7	chr13	2.76621e-06	5.31273	0.00300133
BRCA	chr20	chr3	2.80379e-06	4.90864	0.00303931
ACC	chr16	chr20	3.1508e-06	4.91278	0.00341232
ACC	chr20	chr16	3.1508e-06	4.91278	0.00341232
LUAD	chr20	chr12	3.29343e-06	4.91012	0.00356019
LUAD	chr20	chr11	3.36567e-06	4.93499	0.00363493
KIRC	chr20	chr13	3.85785e-06	4.95863	0.00416262
SKCM	chr8	chr13	3.89657e-06	4.78112	0.0042005
SKCM	chr13	chr8	3.89657e-06	4.78112	0.0042005
STAD	chr13	chr20	4.32921e-06	4.73416	0.00465823
STAD	chr20	chr13	4.32921e-06	4.73416	0.00465823
PRAD	chr7	chr8	4.33193e-06	5.61937	0.00465823
SKCM	chr20	chr19	4.34604e-06	4.80919	0.0046633
GBM	chr20	chr1	4.44971e-06	4.79458	0.00477008
LUAD	chr20	chr18	4.57594e-06	4.92747	0.00490083
SKCM	chr13	chr16	5.1173e-06	4.82429	0.00547551
BRCA	chr8	chr21	5.2085e-06	4.78634	0.00556788
BRCA	chr21	chr8	5.2085e-06	4.78634	0.00556788
ACC	chr12	chr20	5.23645e-06	4.83309	0.00558729
ACC	chr20	chr12	5.23645e-06	4.83309	0.00558729
UCEC	chr20	chr1	5.55609e-06	5.55821	0.00591724
COREAD	chr7	chr5	5.68383e-06	4.77638	0.0060476
BRCA	chr21	chr4	5.80101e-06	4.86435	0.00616648
SKCM	chr20	chr12	5.91233e-06	4.8537	0.00627889
BLCA	chr21	chr19	6.23809e-06	4.79876	0.00661861
KIRC	chr20	chr18	6.47377e-06	4.8208	0.00686219
LIHC	chr20	chr3	6.70181e-06	4.84218	0.00709721
LIHC	chr5	chr15	6.77703e-06	4.79994	0.0071701
COREAD	chr7	chr19	7.00451e-06	4.6911	0.00740377
LGG	chr20	chr1	7.05467e-06	5.09531	0.00744973
ACC	chr12	chr16	7.06099e-06	4.77041	0.00744973
ACC	chr16	chr12	7.06099e-06	4.77041	0.00744973
KIRC	chr5	chr22	7.24509e-06	4.71078	0.00762908
SKCM	chr22	chr15	7.48718e-06	4.67751	0.00787651
LUSC	chr7	chr2	7.68185e-06	4.76009	0.00807363
SKCM	chr7	chr8	7.68211e-06	4.61917	0.00807363
SKCM	chr8	chr7	7.68211e-06	4.61917	0.00807363
BRCA	chr8	chr4	8.49749e-06	4.85761	0.00890537
BRCA	chr8	chr3	9.52567e-06	4.82973	0.00997338
