# Supplementary material for: Regulation of protein complex partners as a compensatory mechanism in aneuploid tumors
Source: eLife. 2022 May 16;11:e75526. doi: 10.7554/eLife.75526 (PMC9135399; doi:10.7554/eLife.75526)
Supplement: Supplementary file 2. [file elife-75526-supp2.xlsx]

## Sheet: Top dysregulated genes
Frequently dysregulated genes and proteins
Genes	Proteins
KYAT3	NFKB2
EIF1B	C8A
TAPT1	COPG1
CCNDBP1	MCMBP
DENND2D	MMP1
BLNK	PKM
HNRNPF	ACSL5
MGST2	AGO3
SERPINB1	ANXA1
SNUPN	APOE
CLDN9	BDH1
CXorf56	C4B
DR1	C8G
GALNT12	CHDH
GPATCH1	CTNND1
NKRF	DDAH2
PEA15	EIF4A2
RAB27A	GLYR1
RPIA	IFI16
TRMT61A	IRF9
ALG2	LDHA
BUB1	LMAN2
C18orf54	LRBA
HEXIM1	NT5C
HS6ST1	OLFML3
IMP3	PLOD1
KLHDC7A	PRDX5
MARCH5	PTCD3
MEGF9	SLC25A5
MOB3C	SLC25A6
MSRA	NFKB1
NFKB1	TNIP1
SAR1A	ABCB7
SLC3A2	ABCE1
SNRPN	ACAA2
SPPL2A	ACSS2
USP27X	AGO1
VDAC2	ALDOA
AMN	ANXA4
ANXA11	APOL2
C9orf85	APOOL
CA4	ARF6
CASC10	ATIC
CAT	BLVRB
CDCA4	C1QC
CELSR3	C5
CENPA	C6
DKC1	C8B
DUSP4	CASP6
GRHPR	CAV1
MAST4	CDH1
MEX3A	CFP
MRPL43	CGN
POLR3C	CNOT11
PROC	COPZ1
RAI2	DDAH1
RDM1	DDX1
RIN1	DDX24
RNF11	DDX58
RPL3	DTX3L
SGSM1	DUT
STARD10	EML2
TFF3	ETFDH
TLCD1	FGA
TRIM21	FHL1
UBA2	GALK1
UBE2J2	GALNT4
AES	GBP4
ANKRD65	GC
ASB14	GCDH
CD3EAP	GCLC
CDC25C	GCLM
DCTD	GPX8
DHDH	GSTA1
EEF1A1	HDLBP
ENHO	HK1
FAM174B	HLA-A
GABARAP	HLA-B
HJURP	HLA-C
IER3IP1	HNRNPK
INPP1	HSD17B10
KIF3C	IKBIP
LMNA	ITIH2
LXN	KLC4
MIER1	KYNU
MINDY3	LAD1
NAPA	LAMTOR1
PIGR	LIG3
POLR1D	LMAN1
PTPN18	LRP1
RAB11A	MAP2K4
RIPPLY3	MRPL2
RND2	MX2
SEPHS1	NAGK
SOCS6	NAPA
STN1	NARS2
TLR3	NUCB2
VAV2	NUP62
VILL	PARP9
ZFYVE21	PBXIP1
ZNF587B	PDIA3
ZNF829	PGM3
ABHD17C	PLG
ABLIM1	POLR1E
AC007950.1	PRKAR2A
ACAA1	PSME2
ANKRD27	QPRT
APOL3	RAB1B
ARPP19	RANGAP1
ASPM	RARS2
ATP6AP1	SERPING1
AURKB	STAMBP
BCAS2	TBRG4
CCDC152	THBS1
CCDC160	TMOD3
CDC37L1	USP14
CHP1	USP7
DDB2	VTN
DNAJC17	ACAD9
DUSP6	ACOT11
EIF3B	ACSF3
ERMAP	ACSS3
FBXL5	AGK
FKBP10	AGL
FZD7	AGO4
GAS2L1	AHSG
GATD1	AIFM1
GMEB1	ALDH16A1
GMPR	ALDH1A2
GNA14	ALDH1B1
GNAI3	AMBP
GRAP	ANXA3
HDAC5	AP1B1
HERC5	APOA1
IL3RA	APOL1
IRF2	ARCN1
JDP2	ARFGAP2
KAT6B	ARFGEF1
LARP4B	ARHGDIB
LARP6	ATPAF1
LEMD2	BCKDHA
MAMSTR	BDH2
MED8	BOD1L1
METTL7B	C1QB
MYO5C	C4BPA
NDUFAF1	C9
NMRK1	CAPG
OAS2	CAPN1
OTUD1	CAPNS1
PATZ1	CARHSP1
TPX2	CSE1L
UBE2C	RALY
MYBL2	STAU1
CDC20	MVP
SEM1	NASP
AURKA	RHEB
NELFCD	SAFB2
TRIP13	C1orf116
CDCA3	DDX27
E2F1	GTF2I
RAB5IF	MSH6
ALG3	SAFB
ACOT8	SSBP1
ADRM1	STAG2
DDX27	TOP1
DEPDC1	TOP2A
GPR19	TRNT1
KIF2C	ACOT8
MRGBP	ACTR3
RALY	CDC5L
TMEM189	CRYL1
TROAP	CTPS1
CCNB1	DECR2
CTNNBL1	DEK
DSN1	DNAJC19
LAGE3	GGCT
SLC35C2	GTF2F1
UBE2S	HNRNPAB
CSE1L	HSPA14
FOXM1	LRPPRC
PDCD5	MBD3
PTTG1	MRI1
RAD54L	MYH14
BCAS4	NCBP2
C5orf34	NDUFA10
EIF2S2	PRKDC
FAM72D	PRPF6
PDRG1	PURA
PIMREG	SMC1A
RAE1	TOP2B
ROMO1	TPX2
RTL8A	TRIP6
SPATA18	ABAT
CYB5D2	AK3
DSCC1	ALDH18A1
ECE2	APOA4
ERCC6L	ATG4B
KCNMB3	ATP6V1A
NUF2	ATP6V1F
TOP2A	C1S
CPNE1	CLEC3B
DNMT3B	CLUH
EXO1	DAP3
MAPRE1	DDX21
MCM7	DNAJC2
MTFR2	EDC4
NASP	EIF4H
NCAPH	FARSB
PIGU	GLRX5
PSMD4	GPX3
RPN2	H2AFY
SSC4D	HEATR1
CBX3	HLA-DRA
CDCA8	ILF2
CDKN3	IPO5
CKS1B	KIF11
CLPTM1L	KIF4A
DGUOK	KIFC1
EMD	KNG1
ESPL1	LARS2
FAM83D	LY75
GINS1	MED1
IGF2BP3	MISP
MTHFD2	MRPL23
PFDN4	MYO1G
RAD51AP1	NDUFA12
SLC35A2	NDUFAF2
SNRPB	PAK1IP1
SNRPG	PDS5B
SPINDOC	PSAT1
TRAIP	RPRD1B
TRIB3	S100A6
TSR2	SCYL1
TTI1	SEPT2
YKT6	SEPT8
AP3B2	SERPINF2
AUNIP	SLC25A13
BIRC5	SMC2
CDCA5	SPR
CHAF1B	STAM
CIRBP	STAT6
CMSS1	TERF2
DNTTIP1	TF
DPY30	TKT
EME1	Showing 1 to 24 of 25 entries, 12 total columns (filtered from 2,852 total entries)
FAM72C	TRRAP
GAPDH	U2SURP
IGF2BP2	UBE2Z
MCM2	UGDH
METTL1	UROD
ORC1	WDR74
PRR11	XRN1
PSMA7	ZFR
PSMC2	ZMYM2
RFC4	AARS
SCML2	ACP2
SMYD5	AHCY
SPAG5	ALB
TK1	AP1M1
TTK	ARHGAP1
ACTL6A	ATP6V1H
ANKHD1-EIF4EBP3	BAZ1B
BCAP31	BLVRA
C19orf48	C1R
CENPF	CDC23
CENPN	CDS2
CHEK1	CFB
CKS2	CFH
COMMD7	CLIC1
DEPDC1B	COG5
FAM72B	COPG2
GPSM2	CP
IRAK1	CTSB
KIF15	CXADR
KIF4A	DDI2
NEK2	DDX18
OTX1	DNMT1
PLK1	DTYMK
POC1A	EED
POLQ	EMD
PSMB2	EZR
RAD54B	F2
SPC24	FAM120A
TBRG4	FEN1
TM9SF4
UBE2T
XRCC2
ANLN
BRIX1
CABLES2
CCNB2
CDC6
CKAP2L

## Sheet: GO_transcriptome
GO analysis on frequently dysregulated genes
geneSet	description	link	size	overlap	expect	enrichmentRatio	pValue	FDR	overlapId	database	userId
GO:0007049	cell cycle	http://amigo.geneontology.org/amigo/term/GO:0007049	1739	79	26.1703	3.01869	0	0	311;332;699;891;990;991;995;1033;1058;1063;1111;1163;1164;1869;2010;2305;2773;4000;4171;4176;4605;4678;4751;4998;5347;5984;6737;6790;7153;7272;7516;8208;8438;8480;8682;8766;9133;9156;9212;9232;9238;9319;9700;9837;10614;10615;10634;10776;11004;11065;11335;22919;22974;23397;23582;24137;25788;25886;27338;29899;51191;54443;54478;54821;55143;55355;55771;56992;79000;79075;79980;81610;81928;83461;83540;…	geneontology_Biological_Process	CCNDBP1;PEA15;BUB1;HEXIM1;ANXA11;CENPA;TRIM21;CDC25C;HJURP;LMNA;RAB11A;ARPP19;ASPM;AURKB;GAS2L1;GNAI3;HERC5;TPX2;UBE2C;MYBL2;CDC20;AURKA;TRIP13;CDCA3;E2F1;KIF2C;CCNB1;DSN1;UBE2S;FOXM1;PTTG1;RAD54L;PIMREG;RAE1;DSCC1;ERCC6L;NUF2;TOP2A;EXO1;MAPRE1;MCM7;NASP;NCAPH;CBX3;CDCA8;CDKN3;CKS1B;EMD;ESPL1;FAM83D;GINS1;AUNIP;BIRC5;CDCA5;CHAF1B;EME1;MCM2;ORC1;PRR11;RFC4;SPAG5;TTK;CENPF;CHEK1;CKS2;GPSM2;KIF15;KI…
GO:0022402	cell cycle process	http://amigo.geneontology.org/amigo/term/GO:0022402	1274	63	19.1725	3.28596	0	0	311;699;891;990;991;995;1033;1058;1063;1111;1163;1164;1869;2010;2305;4000;4171;4176;4605;4678;4751;4998;5347;5984;6790;7153;7272;7516;8480;8766;9133;9156;9212;9232;9238;9319;9700;9837;10615;10634;10776;11004;11065;11335;22919;22974;23397;24137;25788;25886;27338;29899;54443;55143;55771;79000;79075;79980;81610;83540;113130;146956;259266	geneontology_Biological_Process	BUB1;ANXA11;CENPA;CDC25C;LMNA;RAB11A;ARPP19;ASPM;AURKB;GAS2L1;TPX2;UBE2C;MYBL2;CDC20;AURKA;TRIP13;E2F1;KIF2C;CCNB1;DSN1;UBE2S;FOXM1;PTTG1;RAE1;DSCC1;NUF2;TOP2A;EXO1;MAPRE1;MCM7;NASP;NCAPH;CBX3;CDCA8;CDKN3;CKS1B;EMD;ESPL1;FAM83D;GINS1;AUNIP;CDCA5;EME1;MCM2;ORC1;PRR11;RFC4;SPAG5;TTK;CENPF;CHEK1;CKS2;GPSM2;KIF4A;NEK2;PLK1;POC1A;RAD54B;TBRG4;XRCC2;ANLN;CCNB2;CDC6
GO:0000278	mitotic cell cycle	http://amigo.geneontology.org/amigo/term/GO:0000278	927	53	13.9505	3.79916	0	0	699;891;990;991;995;1033;1058;1063;1111;1163;1164;1869;2010;2305;4000;4171;4176;4605;4678;4751;4998;5347;6790;7153;7272;7516;8480;8766;9133;9212;9232;9319;9700;9837;10615;10776;11004;11065;22919;22974;23397;24137;25886;27338;29899;54443;55143;56992;79075;79980;83540;113130;146956	geneontology_Biological_Process	BUB1;CENPA;CDC25C;LMNA;RAB11A;ARPP19;AURKB;TPX2;UBE2C;MYBL2;CDC20;AURKA;TRIP13;E2F1;KIF2C;CCNB1;DSN1;UBE2S;FOXM1;PTTG1;RAE1;DSCC1;NUF2;TOP2A;MAPRE1;MCM7;NASP;NCAPH;CDCA8;CDKN3;CKS1B;EMD;ESPL1;GINS1;CDCA5;EME1;MCM2;ORC1;SPAG5;TTK;CENPF;CHEK1;CKS2;GPSM2;KIF15;KIF4A;NEK2;PLK1;POC1A;XRCC2;ANLN;CCNB2;CDC6
GO:1903047	mitotic cell cycle process	http://amigo.geneontology.org/amigo/term/GO:1903047	788	51	11.8586	4.30066	0	0	699;891;990;991;995;1033;1058;1063;1111;1163;1164;1869;2010;2305;4000;4171;4176;4605;4678;4751;4998;5347;6790;7153;7272;8480;8766;9133;9212;9232;9319;9700;9837;10615;10776;11004;11065;22919;22974;23397;24137;25886;27338;29899;54443;55143;79075;79980;83540;113130;146956	geneontology_Biological_Process	BUB1;CENPA;CDC25C;LMNA;RAB11A;ARPP19;AURKB;TPX2;UBE2C;MYBL2;CDC20;AURKA;TRIP13;E2F1;KIF2C;CCNB1;DSN1;UBE2S;FOXM1;PTTG1;RAE1;DSCC1;NUF2;TOP2A;MAPRE1;MCM7;NASP;NCAPH;CDCA8;CDKN3;CKS1B;EMD;ESPL1;GINS1;CDCA5;EME1;MCM2;ORC1;SPAG5;TTK;CENPF;CHEK1;CKS2;GPSM2;KIF4A;NEK2;PLK1;POC1A;ANLN;CCNB2;CDC6
GO:0051301	cell division	http://amigo.geneontology.org/amigo/term/GO:0051301	583	46	8.77359	5.24301	0	0	311;332;699;847;891;990;991;995;1058;1063;1163;1164;2773;4751;5347;6790;7153;8324;8480;8766;9133;9212;9232;9700;10615;10776;11004;11065;22919;22974;23397;24137;27338;29899;54443;54478;54821;55143;79980;81610;81928;83461;83540;113130;147841;259266	geneontology_Biological_Process	BUB1;ANXA11;CAT;CENPA;CDC25C;RAB11A;ARPP19;ASPM;AURKB;FZD7;GNAI3;TPX2;UBE2C;CDC20;AURKA;CDCA3;KIF2C;CCNB1;DSN1;UBE2S;PTTG1;PIMREG;RAE1;ERCC6L;NUF2;TOP2A;MAPRE1;NCAPH;CDCA8;CKS1B;ESPL1;FAM83D;BIRC5;CDCA5;SPAG5;CENPF;CKS2;GPSM2;KIF4A;NEK2;PLK1;SPC24;ANLN;CABLES2;CCNB2;CDC6
GO:0048285	organelle fission	http://amigo.geneontology.org/amigo/term/GO:0048285	459	39	6.90751	5.64603	0	0	699;891;990;991;995;1063;1111;1164;4605;4751;5347;6790;7153;7272;8766;9133;9212;9232;9319;9700;10005;10615;11004;11065;22974;23397;24137;25788;27338;54443;54708;55143;79075;79980;83540;113115;113130;146956;259266	geneontology_Biological_Process	BUB1;MARCH5;CDC25C;RAB11A;ASPM;AURKB;TPX2;UBE2C;MYBL2;CDC20;AURKA;TRIP13;ACOT8;KIF2C;CCNB1;DSN1;UBE2S;PTTG1;DSCC1;NUF2;TOP2A;MTFR2;NCAPH;CDCA8;ESPL1;CDCA5;EME1;SPAG5;TTK;CENPF;CHEK1;CKS2;KIF4A;NEK2;PLK1;RAD54B;ANLN;CCNB2;CDC6
GO:0000280	nuclear division	http://amigo.geneontology.org/amigo/term/GO:0000280	420	36	6.3206	5.69567	0	0	699;891;990;991;995;1063;1111;1164;4605;4751;5347;6790;7153;7272;8766;9133;9212;9232;9319;9700;10615;11004;11065;22974;23397;24137;25788;27338;54443;55143;79075;79980;83540;113130;146956;259266	geneontology_Biological_Process	BUB1;CDC25C;RAB11A;ASPM;AURKB;TPX2;UBE2C;MYBL2;CDC20;AURKA;TRIP13;KIF2C;CCNB1;DSN1;UBE2S;PTTG1;DSCC1;NUF2;TOP2A;NCAPH;CDCA8;ESPL1;CDCA5;EME1;SPAG5;TTK;CENPF;CHEK1;CKS2;KIF4A;NEK2;PLK1;RAD54B;ANLN;CCNB2;CDC6
GO:0140014	mitotic nuclear division	http://amigo.geneontology.org/amigo/term/GO:0140014	282	31	4.24383	7.30473	0	0	699;891;990;991;995;1063;1111;4605;4751;5347;6790;7272;8766;9133;9212;9232;9319;9700;10615;11004;11065;22974;23397;24137;27338;54443;55143;79075;79980;83540;113130	geneontology_Biological_Process	BUB1;CDC25C;RAB11A;AURKB;TPX2;UBE2C;MYBL2;CDC20;AURKA;TRIP13;KIF2C;CCNB1;DSN1;UBE2S;PTTG1;DSCC1;NUF2;NCAPH;CDCA8;ESPL1;CDCA5;SPAG5;TTK;CENPF;CHEK1;KIF4A;NEK2;PLK1;ANLN;CCNB2;CDC6
GO:0000070	mitotic sister chromatid segregation	http://amigo.geneontology.org/amigo/term/GO:0000070	155	22	2.3326	9.43153	1.55431e-15	1.95049e-12	699;891;990;991;1063;4751;5347;7272;8766;9212;9232;9319;9700;10615;11004;23397;24137;55143;79075;79980;83540;113130	geneontology_Biological_Process	BUB1;RAB11A;AURKB;CDC20;TRIP13;KIF2C;CCNB1;DSN1;PTTG1;DSCC1;NUF2;NCAPH;CDCA8;ESPL1;CDCA5;SPAG5;TTK;CENPF;KIF4A;NEK2;PLK1;CDC6
GO:0000819	sister chromatid segregation	http://amigo.geneontology.org/amigo/term/GO:0000819	185	23	2.78407	8.26128	6.88338e-15	7.77409e-12	699;891;990;991;1063;4751;5347;7153;7272;8766;9212;9232;9319;9700;10615;11004;23397;24137;55143;79075;79980;83540;113130	geneontology_Biological_Process	BUB1;RAB11A;AURKB;CDC20;TRIP13;KIF2C;CCNB1;DSN1;PTTG1;DSCC1;NUF2;TOP2A;NCAPH;CDCA8;ESPL1;CDCA5;SPAG5;TTK;CENPF;KIF4A;NEK2;PLK1;CDC6
GO:0007059	chromosome segregation	http://amigo.geneontology.org/amigo/term/GO:0007059	312	28	4.6953	5.96341	3.35287e-14	3.44249e-11	332;699;891;990;991;1063;4751;5347;7153;7272;8766;9212;9232;9319;9700;10615;11004;23397;24137;55143;55355;55839;79075;79980;81610;83540;113130;146956	geneontology_Biological_Process	BUB1;HJURP;RAB11A;AURKB;CDC20;TRIP13;KIF2C;CCNB1;DSN1;PTTG1;DSCC1;NUF2;TOP2A;NCAPH;CDCA8;ESPL1;FAM83D;BIRC5;CDCA5;EME1;SPAG5;TTK;CENPF;CENPN;KIF4A;NEK2;PLK1;CDC6
GO:0098813	nuclear chromosome segregation	http://amigo.geneontology.org/amigo/term/GO:0098813	258	25	3.88265	6.4389	1.50102e-13	1.41271e-10	699;891;990;991;1063;4751;5347;7153;7272;8766;9212;9232;9319;9700;10615;11004;23397;24137;55143;79075;79980;81610;83540;113130;146956	geneontology_Biological_Process	BUB1;RAB11A;AURKB;CDC20;TRIP13;KIF2C;CCNB1;DSN1;PTTG1;DSCC1;NUF2;TOP2A;NCAPH;CDCA8;ESPL1;FAM83D;CDCA5;EME1;SPAG5;TTK;CENPF;KIF4A;NEK2;PLK1;CDC6
GO:0051276	chromosome organization	http://amigo.geneontology.org/amigo/term/GO:0051276	1143	52	17.201	3.02307	5.08704e-13	4.41947e-10	86;699;891;990;991;1058;1063;1111;1643;1736;1789;1810;4000;4171;4176;4678;4751;5347;5984;6790;7153;7272;8208;8438;8480;8766;9156;9212;9232;9319;9700;9837;10014;10615;11004;11335;23397;23522;24137;25788;55143;55257;55355;55839;57708;79075;79980;79991;83540;84661;113130;122953	geneontology_Biological_Process	DR1;BUB1;CENPA;DKC1;HJURP;LMNA;MIER1;RAB11A;STN1;AURKB;DDB2;HDAC5;JDP2;KAT6B;CDC20;AURKA;TRIP13;KIF2C;MRGBP;CCNB1;DSN1;PTTG1;RAD54L;RAE1;DSCC1;NUF2;TOP2A;DNMT3B;EXO1;MCM7;NASP;NCAPH;CBX3;CDCA8;ESPL1;GINS1;CDCA5;CHAF1B;DPY30;MCM2;RFC4;SPAG5;TTK;ACTL6A;CENPF;CENPN;CHEK1;KIF4A;NEK2;PLK1;RAD54B;CDC6
GO:0007051	spindle organization	http://amigo.geneontology.org/amigo/term/GO:0007051	175	20	2.63358	7.59422	2.09666e-12	1.6914e-09	891;991;4605;4751;5347;6790;7272;8480;8766;9212;9700;10615;22919;22974;24137;25886;29899;79000;83540;259266	geneontology_Biological_Process	RAB11A;ASPM;AURKB;TPX2;MYBL2;CDC20;AURKA;CCNB1;RAE1;NUF2;MAPRE1;ESPL1;AUNIP;SPAG5;TTK;GPSM2;KIF4A;NEK2;PLK1;POC1A
GO:0044770	cell cycle phase transition	http://amigo.geneontology.org/amigo/term/GO:0044770	526	33	7.91579	4.16888	3.89666e-12	2.93393e-09	699;891;990;991;995;1033;1063;1111;1163;1164;1869;2305;4171;4176;4678;4751;4998;5347;6790;7272;8766;9133;9212;9319;9700;10776;11065;22919;22974;27338;54443;81610;113130	geneontology_Biological_Process	BUB1;CDC25C;RAB11A;ARPP19;AURKB;TPX2;UBE2C;CDC20;AURKA;TRIP13;E2F1;CCNB1;UBE2S;FOXM1;MAPRE1;MCM7;NASP;CDKN3;CKS1B;ESPL1;FAM83D;CDCA5;MCM2;ORC1;TTK;CENPF;CHEK1;CKS2;NEK2;PLK1;ANLN;CCNB2;CDC6
GO:0044772	mitotic cell cycle phase transition	http://amigo.geneontology.org/amigo/term/GO:0044772	487	31	7.32888	4.22984	1.2738e-11	8.99146e-09	699;891;990;991;995;1033;1063;1163;1164;1869;2305;4171;4176;4678;4751;4998;5347;6790;7272;8766;9133;9212;9319;9700;10776;11065;22919;22974;27338;54443;113130	geneontology_Biological_Process	BUB1;CDC25C;RAB11A;ARPP19;AURKB;TPX2;UBE2C;CDC20;AURKA;TRIP13;E2F1;CCNB1;UBE2S;FOXM1;MAPRE1;MCM7;NASP;CDKN3;CKS1B;ESPL1;CDCA5;MCM2;ORC1;TTK;CENPF;CKS2;NEK2;PLK1;ANLN;CCNB2;CDC6
GO:1902850	microtubule cytoskeleton organization involved in mitosis	http://amigo.geneontology.org/amigo/term/GO:1902850	132	17	1.98647	8.55788	1.4331e-11	9.52083e-09	891;991;1058;4605;4751;5347;6790;7272;8480;8766;9212;9700;22974;24137;25886;29899;83540	geneontology_Biological_Process	CENPA;RAB11A;AURKB;TPX2;MYBL2;CDC20;AURKA;CCNB1;RAE1;NUF2;ESPL1;TTK;GPSM2;KIF4A;NEK2;PLK1;POC1A
GO:0007088	regulation of mitotic nuclear division	http://amigo.geneontology.org/amigo/term/GO:0007088	178	19	2.67873	7.09292	2.55316e-11	1.60196e-08	699;891;990;991;995;1063;1111;4751;5347;6790;7272;9133;9212;9232;9319;9700;11065;54443;113130	geneontology_Biological_Process	BUB1;CDC25C;AURKB;UBE2C;CDC20;AURKA;TRIP13;CCNB1;PTTG1;ESPL1;CDCA5;TTK;CENPF;CHEK1;NEK2;PLK1;ANLN;CCNB2;CDC6
GO:0051983	regulation of chromosome segregation	http://amigo.geneontology.org/amigo/term/GO:0051983	101	15	1.51995	9.86873	2.90872e-11	1.729e-08	699;891;990;991;1063;4751;5347;7272;9212;9232;9319;9700;10615;11004;113130	geneontology_Biological_Process	BUB1;AURKB;CDC20;TRIP13;KIF2C;CCNB1;PTTG1;ESPL1;CDCA5;SPAG5;TTK;CENPF;NEK2;PLK1;CDC6
GO:0051304	chromosome separation	http://amigo.geneontology.org/amigo/term/GO:0051304	89	14	1.33936	10.4527	6.06512e-11	3.42497e-08	699;891;990;991;1063;5347;7153;7272;9212;9232;9319;9700;23397;146956	geneontology_Biological_Process	BUB1;AURKB;CDC20;TRIP13;CCNB1;PTTG1;TOP2A;NCAPH;ESPL1;EME1;TTK;CENPF;PLK1;CDC6
GO:0051726	regulation of cell cycle	http://amigo.geneontology.org/amigo/term/GO:0051726	1106	47	16.6442	2.8238	8.47861e-11	4.55988e-08	699;891;990;991;995;1033;1063;1111;1163;1164;1869;2305;4605;4751;4998;5347;6737;6790;7153;7272;8480;8682;8766;9133;9212;9232;9238;9319;9700;10614;10615;10634;11065;11335;22919;22974;23582;25886;29899;51191;54443;55771;81610;81928;113130;146956;259266	geneontology_Biological_Process	CCNDBP1;PEA15;BUB1;HEXIM1;TRIM21;CDC25C;RAB11A;ASPM;AURKB;GAS2L1;HERC5;TPX2;UBE2C;MYBL2;CDC20;AURKA;TRIP13;E2F1;CCNB1;FOXM1;PTTG1;RAE1;TOP2A;MAPRE1;CBX3;CDKN3;CKS1B;ESPL1;FAM83D;CDCA5;EME1;ORC1;PRR11;SPAG5;TTK;CENPF;CHEK1;CKS2;GPSM2;NEK2;PLK1;POC1A;TBRG4;ANLN;CABLES2;CCNB2;CDC6
GO:0007052	mitotic spindle organization	http://amigo.geneontology.org/amigo/term/GO:0007052	111	15	1.67044	8.97965	1.16226e-10	5.9666e-08	891;991;4605;4751;5347;6790;7272;8480;8766;9212;22974;24137;25886;29899;83540	geneontology_Biological_Process	RAB11A;AURKB;TPX2;MYBL2;CDC20;AURKA;CCNB1;RAE1;NUF2;TTK;GPSM2;KIF4A;NEK2;PLK1;POC1A
GO:0051783	regulation of nuclear division	http://amigo.geneontology.org/amigo/term/GO:0051783	202	19	3.03991	6.25019	2.31189e-10	1.13524e-07	699;891;990;991;995;1063;1111;4751;5347;6790;7272;9133;9212;9232;9319;9700;11065;54443;113130	geneontology_Biological_Process	BUB1;CDC25C;AURKB;UBE2C;CDC20;AURKA;TRIP13;CCNB1;PTTG1;ESPL1;CDCA5;TTK;CENPF;CHEK1;NEK2;PLK1;ANLN;CCNB2;CDC6
hsa04110	Cell cycle	http://www.kegg.jp/kegg-bin/show_pathway?hsa04110+1111+1869+4171+4176+4998+5347+699+7272+891+9133+9232+9700+990+991+995	124	15	1.86608	8.03824	5.72874e-10	2.69585e-07	1111;1869;4171;4176;4998;5347;699;7272;891;9133;9232;9700;990;991;995	pathway_KEGG	BUB1;CDC25C;CDC20;E2F1;CCNB1;PTTG1;MCM7;ESPL1;MCM2;ORC1;TTK;CHEK1;PLK1;CCNB2;CDC6
GO:0010965	regulation of mitotic sister chromatid separation	http://amigo.geneontology.org/amigo/term/GO:0010965	56	11	0.842746	13.0526	5.97123e-10	2.69756e-07	699;891;990;991;1063;5347;7272;9212;9232;9319;9700	geneontology_Biological_Process	BUB1;AURKB;CDC20;TRIP13;CCNB1;PTTG1;ESPL1;TTK;CENPF;PLK1;CDC6
GO:0033046	negative regulation of sister chromatid segregation	http://amigo.geneontology.org/amigo/term/GO:0033046	43	10	0.647109	15.4534	6.23602e-10	2.70883e-07	699;891;991;1063;5347;7272;9212;9232;9319;9700	geneontology_Biological_Process	BUB1;AURKB;CDC20;TRIP13;CCNB1;PTTG1;ESPL1;TTK;CENPF;PLK1
GO:0051985	negative regulation of chromosome segregation	http://amigo.geneontology.org/amigo/term/GO:0051985	44	10	0.662158	15.1021	7.96404e-10	3.33133e-07	699;891;991;1063;5347;7272;9212;9232;9319;9700	geneontology_Biological_Process	BUB1;AURKB;CDC20;TRIP13;CCNB1;PTTG1;ESPL1;TTK;CENPF;PLK1
GO:0051306	mitotic sister chromatid separation	http://amigo.geneontology.org/amigo/term/GO:0051306	59	11	0.887893	12.3889	1.07845e-09	4.20594e-07	699;891;990;991;1063;5347;7272;9212;9232;9319;9700	geneontology_Biological_Process	BUB1;AURKB;CDC20;TRIP13;CCNB1;PTTG1;ESPL1;TTK;CENPF;PLK1;CDC6
GO:0033044	regulation of chromosome organization	http://amigo.geneontology.org/amigo/term/GO:0033044	329	23	4.95113	4.6454	1.07997e-09	4.20594e-07	699;891;990;991;1063;1111;1736;1789;4000;4171;4751;5347;7153;7272;9212;9232;9319;9700;10014;57708;79991;113130;122953	geneontology_Biological_Process	BUB1;DKC1;LMNA;MIER1;STN1;AURKB;HDAC5;JDP2;CDC20;TRIP13;CCNB1;PTTG1;TOP2A;DNMT3B;ESPL1;CDCA5;MCM2;TTK;CENPF;CHEK1;NEK2;PLK1;CDC6
GO:0051321	meiotic cell cycle	http://amigo.geneontology.org/amigo/term/GO:0051321	248	20	3.73216	5.35883	1.1827e-09	4.45247e-07	699;991;995;1164;4751;5347;6790;7153;7272;7516;8438;9156;9232;9319;9700;23397;25788;83540;146956;259266	geneontology_Biological_Process	BUB1;CDC25C;ASPM;CDC20;AURKA;TRIP13;PTTG1;RAD54L;NUF2;TOP2A;EXO1;NCAPH;ESPL1;EME1;TTK;CKS2;NEK2;PLK1;RAD54B;XRCC2
GO:1905818	regulation of chromosome separation	http://amigo.geneontology.org/amigo/term/GO:1905818	61	11	0.917991	11.9827	1.56881e-09	5.71551e-07	699;891;990;991;1063;5347;7272;9212;9232;9319;9700	geneontology_Biological_Process	BUB1;AURKB;CDC20;TRIP13;CCNB1;PTTG1;ESPL1;TTK;CENPF;PLK1;CDC6
GO:0033045	regulation of sister chromatid segregation	http://amigo.geneontology.org/amigo/term/GO:0033045	79	12	1.18887	10.0936	2.20625e-09	7.78668e-07	699;891;990;991;1063;5347;7272;9212;9232;9319;9700;113130	geneontology_Biological_Process	BUB1;AURKB;CDC20;TRIP13;CCNB1;PTTG1;ESPL1;CDCA5;TTK;CENPF;PLK1;CDC6
GO:1903046	meiotic cell cycle process	http://amigo.geneontology.org/amigo/term/GO:1903046	186	17	2.79912	6.07334	3.26146e-09	1.11621e-06	699;991;995;1164;5347;6790;7153;7272;9156;9232;9319;9700;23397;25788;83540;146956;259266	geneontology_Biological_Process	BUB1;CDC25C;ASPM;CDC20;AURKA;TRIP13;PTTG1;NUF2;TOP2A;EXO1;NCAPH;ESPL1;EME1;TTK;CKS2;PLK1;RAD54B
GO:0007346	regulation of mitotic cell cycle	http://amigo.geneontology.org/amigo/term/GO:0007346	578	30	8.69834	3.44893	3.69212e-09	1.17283e-06	699;891;990;991;995;1063;1111;1163;1164;1869;4751;4998;5347;6790;7153;7272;8480;8766;9133;9212;9232;9319;9700;11065;22919;22974;29899;54443;113130;146956	geneontology_Biological_Process	BUB1;CDC25C;RAB11A;AURKB;TPX2;UBE2C;CDC20;AURKA;TRIP13;E2F1;CCNB1;PTTG1;RAE1;TOP2A;MAPRE1;CKS1B;ESPL1;CDCA5;EME1;ORC1;TTK;CENPF;CHEK1;CKS2;GPSM2;NEK2;PLK1;ANLN;CCNB2;CDC6
GO:0030071	regulation of mitotic metaphase/anaphase transition	http://amigo.geneontology.org/amigo/term/GO:0030071	51	10	0.767501	13.0293	3.73843e-09	1.17283e-06	699;891;990;991;1063;5347;7272;9212;9319;9700	geneontology_Biological_Process	BUB1;AURKB;CDC20;TRIP13;CCNB1;ESPL1;TTK;CENPF;PLK1;CDC6
GO:0045839	negative regulation of mitotic nuclear division	http://amigo.geneontology.org/amigo/term/GO:0045839	51	10	0.767501	13.0293	3.73843e-09	1.17283e-06	699;891;991;1063;1111;5347;7272;9212;9232;9319	geneontology_Biological_Process	BUB1;AURKB;CDC20;TRIP13;CCNB1;PTTG1;TTK;CENPF;CHEK1;PLK1
GO:2000816	negative regulation of mitotic sister chromatid separation	http://amigo.geneontology.org/amigo/term/GO:2000816	38	9	0.571863	15.738	3.85199e-09	1.17579e-06	699;891;991;1063;5347;7272;9212;9232;9319	geneontology_Biological_Process	BUB1;AURKB;CDC20;TRIP13;CCNB1;PTTG1;TTK;CENPF;PLK1
GO:0033047	regulation of mitotic sister chromatid segregation	http://amigo.geneontology.org/amigo/term/GO:0033047	67	11	1.00829	10.9096	4.45234e-09	1.32328e-06	699;891;990;991;1063;5347;7272;9212;9232;9319;9700	geneontology_Biological_Process	BUB1;AURKB;CDC20;TRIP13;CCNB1;PTTG1;ESPL1;TTK;CENPF;PLK1;CDC6
GO:1905819	negative regulation of chromosome separation	http://amigo.geneontology.org/amigo/term/GO:1905819	39	9	0.586912	15.3345	4.94218e-09	1.43121e-06	699;891;991;1063;5347;7272;9212;9232;9319	geneontology_Biological_Process	BUB1;AURKB;CDC20;TRIP13;CCNB1;PTTG1;TTK;CENPF;PLK1
GO:1902099	regulation of metaphase/anaphase transition of cell cycle	http://amigo.geneontology.org/amigo/term/GO:1902099	53	10	0.797599	12.5376	5.55598e-09	1.56873e-06	699;891;990;991;1063;5347;7272;9212;9319;9700	geneontology_Biological_Process	BUB1;AURKB;CDC20;TRIP13;CCNB1;ESPL1;TTK;CENPF;PLK1;CDC6
GO:0007091	metaphase/anaphase transition of mitotic cell cycle	http://amigo.geneontology.org/amigo/term/GO:0007091	54	10	0.812648	12.3055	6.72911e-09	1.85362e-06	699;891;990;991;1063;5347;7272;9212;9319;9700	geneontology_Biological_Process	BUB1;AURKB;CDC20;TRIP13;CCNB1;ESPL1;TTK;CENPF;PLK1;CDC6
GO:0033048	negative regulation of mitotic sister chromatid segregation	http://amigo.geneontology.org/amigo/term/GO:0033048	41	9	0.61701	14.5865	7.95853e-09	2.14009e-06	699;891;991;1063;5347;7272;9212;9232;9319	geneontology_Biological_Process	BUB1;AURKB;CDC20;TRIP13;CCNB1;PTTG1;TTK;CENPF;PLK1
GO:0044784	metaphase/anaphase transition of cell cycle	http://amigo.geneontology.org/amigo/term/GO:0044784	56	10	0.842746	11.866	9.75104e-09	2.56112e-06	699;891;990;991;1063;5347;7272;9212;9319;9700	geneontology_Biological_Process	BUB1;AURKB;CDC20;TRIP13;CCNB1;ESPL1;TTK;CENPF;PLK1;CDC6
GO:0000226	microtubule cytoskeleton organization	http://amigo.geneontology.org/amigo/term/GO:0000226	540	28	8.12648	3.44553	1.29763e-08	3.33078e-06	891;991;1058;1111;2597;4000;4605;4751;5347;6790;7272;7516;8480;8766;9212;9700;10615;11004;11261;11337;22919;22974;24137;25886;29899;79000;83540;259266	geneontology_Biological_Process	CENPA;GABARAP;LMNA;RAB11A;ASPM;AURKB;CHP1;TPX2;MYBL2;CDC20;AURKA;KIF2C;CCNB1;RAE1;NUF2;MAPRE1;ESPL1;AUNIP;GAPDH;SPAG5;TTK;CHEK1;GPSM2;KIF4A;NEK2;PLK1;POC1A;XRCC2
GO:0051225	spindle assembly	http://amigo.geneontology.org/amigo/term/GO:0051225	113	13	1.70054	7.64463	1.527e-08	3.83243e-06	991;4605;4751;5347;6790;8766;9212;10615;22919;22974;24137;29899;259266	geneontology_Biological_Process	RAB11A;ASPM;AURKB;TPX2;MYBL2;CDC20;AURKA;MAPRE1;SPAG5;GPSM2;KIF4A;NEK2;PLK1
GO:0051784	negative regulation of nuclear division	http://amigo.geneontology.org/amigo/term/GO:0051784	59	10	0.887893	11.2626	1.65365e-08	4.06006e-06	699;891;991;1063;1111;5347;7272;9212;9232;9319	geneontology_Biological_Process	BUB1;AURKB;CDC20;TRIP13;CCNB1;PTTG1;TTK;CENPF;CHEK1;PLK1
GO:1901987	regulation of cell cycle phase transition	http://amigo.geneontology.org/amigo/term/GO:1901987	386	23	5.80893	3.95942	2.23464e-08	5.36978e-06	699;891;990;991;995;1063;1111;1869;4751;4998;5347;6790;7272;8766;9212;9319;9700;11065;22919;22974;54443;81610;113130	geneontology_Biological_Process	BUB1;CDC25C;RAB11A;AURKB;TPX2;UBE2C;CDC20;AURKA;TRIP13;E2F1;CCNB1;MAPRE1;ESPL1;FAM83D;CDCA5;ORC1;TTK;CENPF;CHEK1;NEK2;PLK1;ANLN;CDC6
GO:2001251	negative regulation of chromosome organization	http://amigo.geneontology.org/amigo/term/GO:2001251	140	14	2.10687	6.64494	2.6128e-08	6.1477e-06	699;891;991;1063;1789;4171;5347;7153;7272;9212;9232;9319;9700;79991	geneontology_Biological_Process	BUB1;STN1;AURKB;CDC20;TRIP13;CCNB1;PTTG1;TOP2A;DNMT3B;ESPL1;MCM2;TTK;CENPF;PLK1
GO:0007093	mitotic cell cycle checkpoint	http://amigo.geneontology.org/amigo/term/GO:0007093	165	15	2.48309	6.04086	3.009e-08	6.45147e-06	699;891;990;991;995;1063;1869;4998;5347;6790;7153;7272;9212;9319;146956	geneontology_Biological_Process	BUB1;CDC25C;AURKB;CDC20;AURKA;TRIP13;E2F1;CCNB1;TOP2A;EME1;ORC1;TTK;CENPF;PLK1;CDC6
GO:0007094	mitotic spindle assembly checkpoint	http://amigo.geneontology.org/amigo/term/GO:0007094	34	8	0.511667	15.6352	3.0653e-08	6.45147e-06	699;891;991;1063;5347;7272;9212;9319	geneontology_Biological_Process	BUB1;AURKB;CDC20;TRIP13;CCNB1;TTK;CENPF;PLK1
GO:0031577	spindle checkpoint	http://amigo.geneontology.org/amigo/term/GO:0031577	34	8	0.511667	15.6352	3.0653e-08	6.45147e-06	699;891;991;1063;5347;7272;9212;9319	geneontology_Biological_Process	BUB1;AURKB;CDC20;TRIP13;CCNB1;TTK;CENPF;PLK1
GO:0071173	spindle assembly checkpoint	http://amigo.geneontology.org/amigo/term/GO:0071173	34	8	0.511667	15.6352	3.0653e-08	6.45147e-06	699;891;991;1063;5347;7272;9212;9319	geneontology_Biological_Process	BUB1;AURKB;CDC20;TRIP13;CCNB1;TTK;CENPF;PLK1
GO:0071174	mitotic spindle checkpoint	http://amigo.geneontology.org/amigo/term/GO:0071174	34	8	0.511667	15.6352	3.0653e-08	6.45147e-06	699;891;991;1063;5347;7272;9212;9319	geneontology_Biological_Process	BUB1;AURKB;CDC20;TRIP13;CCNB1;TTK;CENPF;PLK1
GO:0000075	cell cycle checkpoint	http://amigo.geneontology.org/amigo/term/GO:0000075	216	17	3.25059	5.22982	3.08464e-08	6.45147e-06	699;891;990;991;995;1063;1111;1869;4998;5347;6790;7153;7272;8682;9212;9319;146956	geneontology_Biological_Process	PEA15;BUB1;CDC25C;AURKB;CDC20;AURKA;TRIP13;E2F1;CCNB1;TOP2A;EME1;ORC1;TTK;CENPF;CHEK1;PLK1;CDC6
GO:0140013	meiotic nuclear division	http://amigo.geneontology.org/amigo/term/GO:0140013	169	15	2.54329	5.89788	4.15076e-08	8.52339e-06	699;991;1164;5347;6790;7153;7272;9232;9319;9700;23397;25788;83540;146956;259266	geneontology_Biological_Process	BUB1;ASPM;CDC20;AURKA;TRIP13;PTTG1;NUF2;TOP2A;NCAPH;ESPL1;EME1;TTK;CKS2;PLK1;RAD54B
GO:0045841	negative regulation of mitotic metaphase/anaphase transition	http://amigo.geneontology.org/amigo/term/GO:0045841	36	8	0.541765	14.7665	4.97746e-08	1.00385e-05	699;891;991;1063;5347;7272;9212;9319	geneontology_Biological_Process	BUB1;AURKB;CDC20;TRIP13;CCNB1;TTK;CENPF;PLK1
GO:0010564	regulation of cell cycle process	http://amigo.geneontology.org/amigo/term/GO:0010564	689	31	10.3688	2.98974	5.47101e-08	1.08403e-05	699;891;990;991;995;1063;1111;1869;2305;4751;4998;5347;6790;7272;8480;8766;9133;9212;9232;9319;9700;10615;11065;11335;22919;22974;25886;29899;54443;81610;113130	geneontology_Biological_Process	BUB1;CDC25C;RAB11A;AURKB;TPX2;UBE2C;CDC20;AURKA;TRIP13;E2F1;CCNB1;FOXM1;PTTG1;RAE1;MAPRE1;CBX3;ESPL1;FAM83D;CDCA5;ORC1;SPAG5;TTK;CENPF;CHEK1;GPSM2;NEK2;PLK1;POC1A;ANLN;CCNB2;CDC6
GO:1902100	negative regulation of metaphase/anaphase transition of cell cycle	http://amigo.geneontology.org/amigo/term/GO:1902100	37	8	0.556814	14.3674	6.26838e-08	1.19992e-05	699;891;991;1063;5347;7272;9212;9319	geneontology_Biological_Process	BUB1;AURKB;CDC20;TRIP13;CCNB1;TTK;CENPF;PLK1
GO:0031145	anaphase-promoting complex-dependent catabolic process	http://amigo.geneontology.org/amigo/term/GO:0031145	37	8	0.556814	14.3674	6.26838e-08	1.19992e-05	891;991;5347;6790;9212;9232;11065;27338	geneontology_Biological_Process	AURKB;UBE2C;CDC20;AURKA;CCNB1;UBE2S;PTTG1;PLK1
GO:1901990	regulation of mitotic cell cycle phase transition	http://amigo.geneontology.org/amigo/term/GO:1901990	354	21	5.32736	3.94192	1.00905e-07	1.89624e-05	699;891;990;991;995;1063;1869;4751;4998;5347;6790;7272;8766;9212;9319;9700;11065;22919;22974;54443;113130	geneontology_Biological_Process	BUB1;CDC25C;RAB11A;AURKB;TPX2;UBE2C;CDC20;AURKA;TRIP13;E2F1;CCNB1;MAPRE1;ESPL1;CDCA5;ORC1;TTK;CENPF;NEK2;PLK1;ANLN;CDC6
GO:0045786	negative regulation of cell cycle	http://amigo.geneontology.org/amigo/term/GO:0045786	559	27	8.41241	3.20954	1.02418e-07	1.89624e-05	699;891;990;991;995;1033;1063;1111;1869;2305;4751;4998;5347;6790;7153;7272;8682;9212;9232;9238;9319;9700;10614;10634;11335;55771;146956	geneontology_Biological_Process	PEA15;BUB1;HEXIM1;CDC25C;AURKB;GAS2L1;CDC20;AURKA;TRIP13;E2F1;CCNB1;FOXM1;PTTG1;TOP2A;CBX3;CDKN3;ESPL1;EME1;ORC1;PRR11;TTK;CENPF;CHEK1;NEK2;PLK1;TBRG4;CDC6
GO:0044839	cell cycle G2/M phase transition	http://amigo.geneontology.org/amigo/term/GO:0044839	213	16	3.20544	4.99151	1.50871e-07	2.74829e-05	891;990;995;1063;1111;2305;4751;4998;5347;6790;8766;9133;9212;10776;22919;22974	geneontology_Biological_Process	CDC25C;RAB11A;ARPP19;AURKB;TPX2;AURKA;CCNB1;FOXM1;MAPRE1;ORC1;CENPF;CHEK1;NEK2;PLK1;CCNB2;CDC6
GO:0007017	microtubule-based process	http://amigo.geneontology.org/amigo/term/GO:0007017	729	31	10.9707	2.8257	1.91813e-07	3.43862e-05	891;991;1058;1111;2597;3797;4000;4605;4751;5347;6790;7272;7516;8120;8480;8766;9212;9700;10615;11004;11261;11337;22919;22974;24137;25886;29899;56992;79000;83540;259266	geneontology_Biological_Process	CENPA;GABARAP;KIF3C;LMNA;RAB11A;ASPM;AURKB;CHP1;TPX2;MYBL2;CDC20;AURKA;KIF2C;CCNB1;RAE1;NUF2;MAPRE1;ESPL1;AP3B2;AUNIP;GAPDH;SPAG5;TTK;CHEK1;GPSM2;KIF15;KIF4A;NEK2;PLK1;POC1A;XRCC2
GO:0010948	negative regulation of cell cycle process	http://amigo.geneontology.org/amigo/term/GO:0010948	278	18	4.18363	4.30248	2.35271e-07	4.1518e-05	699;891;990;991;995;1063;1111;1869;4751;4998;5347;6790;7272;9212;9232;9319;9700;11335	geneontology_Biological_Process	BUB1;CDC25C;AURKB;CDC20;AURKA;TRIP13;E2F1;CCNB1;PTTG1;CBX3;ESPL1;ORC1;TTK;CENPF;CHEK1;NEK2;PLK1;CDC6
GO:0033043	regulation of organelle organization	http://amigo.geneontology.org/amigo/term/GO:0033043	1245	43	18.7361	2.29504	2.55778e-07	4.37954e-05	699;891;990;991;995;1063;1111;1736;1789;1869;4000;4171;4751;5347;6790;7153;7272;8153;8480;9133;9141;9212;9232;9319;9700;10014;10615;11065;22919;22974;25886;29899;50853;54443;54708;56681;57708;79991;84079;113130;118424;122953;202018	geneontology_Biological_Process	TAPT1;BUB1;MARCH5;SAR1A;DKC1;UBE2J2;CDC25C;LMNA;MIER1;RND2;STN1;VILL;ANKRD27;AURKB;HDAC5;JDP2;TPX2;UBE2C;CDC20;AURKA;TRIP13;E2F1;CCNB1;PDCD5;PTTG1;RAE1;TOP2A;DNMT3B;MAPRE1;ESPL1;CDCA5;MCM2;SPAG5;TTK;CENPF;CHEK1;GPSM2;NEK2;PLK1;POC1A;ANLN;CCNB2;CDC6
GO:0000086	G2/M transition of mitotic cell cycle	http://amigo.geneontology.org/amigo/term/GO:0000086	194	15	2.91951	5.13784	2.55932e-07	4.37954e-05	891;990;995;1063;2305;4751;4998;5347;6790;8766;9133;9212;10776;22919;22974	geneontology_Biological_Process	CDC25C;RAB11A;ARPP19;AURKB;TPX2;AURKA;CCNB1;FOXM1;MAPRE1;ORC1;CENPF;NEK2;PLK1;CCNB2;CDC6
GO:0051310	metaphase plate congression	http://amigo.geneontology.org/amigo/term/GO:0051310	60	9	0.902942	9.96742	2.61664e-07	4.41079e-05	891;1063;8766;10615;11004;55143;81610;83540;113130	geneontology_Biological_Process	RAB11A;KIF2C;CCNB1;NUF2;CDCA8;FAM83D;CDCA5;SPAG5;CENPF
GO:0045930	negative regulation of mitotic cell cycle	http://amigo.geneontology.org/amigo/term/GO:0045930	256	17	3.85255	4.41266	3.5913e-07	5.96473e-05	699;891;990;991;995;1063;1111;1869;4998;5347;6790;7153;7272;9212;9232;9319;146956	geneontology_Biological_Process	BUB1;CDC25C;AURKB;CDC20;AURKA;TRIP13;E2F1;CCNB1;PTTG1;TOP2A;EME1;ORC1;TTK;CENPF;CHEK1;PLK1;CDC6
GO:0045132	meiotic chromosome segregation	http://amigo.geneontology.org/amigo/term/GO:0045132	87	10	1.30927	7.63787	7.27484e-07	0.000119075	699;5347;7153;7272;9232;9319;9700;23397;83540;146956	geneontology_Biological_Process	BUB1;TRIP13;PTTG1;NUF2;TOP2A;NCAPH;ESPL1;EME1;TTK;PLK1
GO:1901988	negative regulation of cell cycle phase transition	http://amigo.geneontology.org/amigo/term/GO:1901988	186	14	2.79912	5.00157	8.93843e-07	0.000144215	699;891;990;991;995;1063;1111;1869;4998;5347;6790;7272;9212;9319	geneontology_Biological_Process	BUB1;CDC25C;AURKB;CDC20;AURKA;TRIP13;E2F1;CCNB1;ORC1;TTK;CENPF;CHEK1;PLK1;CDC6
GO:0010639	negative regulation of organelle organization	http://amigo.geneontology.org/amigo/term/GO:0010639	371	20	5.58319	3.58218	9.32114e-07	0.000148272	699;891;991;1063;1111;1789;4000;4171;4751;5347;7153;7272;9212;9232;9319;9700;22919;50853;79991;84079	geneontology_Biological_Process	BUB1;LMNA;STN1;VILL;ANKRD27;AURKB;CDC20;TRIP13;CCNB1;PTTG1;TOP2A;DNMT3B;MAPRE1;ESPL1;MCM2;TTK;CENPF;CHEK1;NEK2;PLK1
GO:0000079	regulation of cyclin-dependent protein serine/threonine kinase activity	http://amigo.geneontology.org/amigo/term/GO:0000079	92	10	1.38451	7.22277	1.22748e-06	0.000192544	891;990;995;1033;1163;1164;5347;9133;10614;51191	geneontology_Biological_Process	HEXIM1;CDC25C;HERC5;CCNB1;CDKN3;CKS1B;CKS2;PLK1;CCNB2;CDC6
GO:1902749	regulation of cell cycle G2/M phase transition	http://amigo.geneontology.org/amigo/term/GO:1902749	167	13	2.51319	5.17271	1.5116e-06	0.000233863	891;990;995;1063;1111;4751;4998;5347;6790;8766;9212;22919;22974	geneontology_Biological_Process	CDC25C;RAB11A;AURKB;TPX2;AURKA;CCNB1;MAPRE1;ORC1;CENPF;CHEK1;NEK2;PLK1;CDC6
GO:1901991	negative regulation of mitotic cell cycle phase transition	http://amigo.geneontology.org/amigo/term/GO:1901991	169	13	2.54329	5.1115	1.7282e-06	0.00026376	699;891;990;991;995;1063;1869;4998;5347;6790;7272;9212;9319	geneontology_Biological_Process	BUB1;CDC25C;AURKB;CDC20;AURKA;TRIP13;E2F1;CCNB1;ORC1;TTK;CENPF;PLK1;CDC6
GO:1904029	regulation of cyclin-dependent protein kinase activity	http://amigo.geneontology.org/amigo/term/GO:1904029	96	10	1.44471	6.92182	1.82154e-06	0.0002743	891;990;995;1033;1163;1164;5347;9133;10614;51191	geneontology_Biological_Process	HEXIM1;CDC25C;HERC5;CCNB1;CDKN3;CKS1B;CKS2;PLK1;CCNB2;CDC6
GO:0051303	establishment of chromosome localization	http://amigo.geneontology.org/amigo/term/GO:0051303	77	9	1.15878	7.76682	2.28502e-06	0.000339566	891;1063;8766;10615;11004;55143;81610;83540;113130	geneontology_Biological_Process	RAB11A;KIF2C;CCNB1;NUF2;CDCA8;FAM83D;CDCA5;SPAG5;CENPF
GO:0050000	chromosome localization	http://amigo.geneontology.org/amigo/term/GO:0050000	78	9	1.17382	7.66724	2.54946e-06	0.000373942	891;1063;8766;10615;11004;55143;81610;83540;113130	geneontology_Biological_Process	RAB11A;KIF2C;CCNB1;NUF2;CDCA8;FAM83D;CDCA5;SPAG5;CENPF
GO:0010389	regulation of G2/M transition of mitotic cell cycle	http://amigo.geneontology.org/amigo/term/GO:0010389	150	12	2.25736	5.31596	2.88617e-06	0.000417903	891;990;995;1063;4751;4998;5347;6790;8766;9212;22919;22974	geneontology_Biological_Process	CDC25C;RAB11A;AURKB;TPX2;AURKA;CCNB1;MAPRE1;ORC1;CENPF;NEK2;PLK1;CDC6
GO:0090307	mitotic spindle assembly	http://amigo.geneontology.org/amigo/term/GO:0090307	61	8	0.917991	8.71468	3.49958e-06	0.000500308	991;4605;4751;5347;8766;9212;22974;24137	geneontology_Biological_Process	RAB11A;AURKB;TPX2;MYBL2;CDC20;KIF4A;NEK2;PLK1
GO:0008017	microtubule binding	http://amigo.geneontology.org/amigo/term/GO:0008017	239	15	3.59672	4.17047	3.5624e-06	0.000502922	332;2597;3797;5347;8480;8766;10615;10634;11004;11261;11337;22919;24137;56992;81610	geneontology_Molecular_Function	GABARAP;KIF3C;RAB11A;CHP1;GAS2L1;KIF2C;RAE1;MAPRE1;FAM83D;BIRC5;GAPDH;SPAG5;KIF15;KIF4A;PLK1
GO:0045787	positive regulation of cell cycle	http://amigo.geneontology.org/amigo/term/GO:0045787	374	19	5.62834	3.37577	4.18108e-06	0.000582976	891;990;995;1111;1163;1164;1869;6737;6790;8766;9133;9212;9700;10615;11065;25886;29899;81610;113130	geneontology_Biological_Process	TRIM21;CDC25C;RAB11A;AURKB;UBE2C;AURKA;E2F1;CCNB1;CKS1B;ESPL1;FAM83D;CDCA5;SPAG5;CHEK1;CKS2;GPSM2;POC1A;CCNB2;CDC6
GO:0007143	female meiotic nuclear division	http://amigo.geneontology.org/amigo/term/GO:0007143	30	6	0.451471	13.2899	4.81399e-06	0.000656194	5347;6790;7153;7272;9319;23397	geneontology_Biological_Process	AURKA;TRIP13;TOP2A;NCAPH;TTK;PLK1
GO:0071103	DNA conformation change	http://amigo.geneontology.org/amigo/term/GO:0071103	245	15	3.68701	4.06833	4.82239e-06	0.000656194	891;1058;4171;4176;4678;7153;8208;8438;9837;23397;23522;25788;55355;55839;113130	geneontology_Biological_Process	CENPA;HJURP;KAT6B;CCNB1;RAD54L;TOP2A;MCM7;NASP;NCAPH;GINS1;CDCA5;CHAF1B;MCM2;CENPN;RAD54B
GO:0008608	attachment of spindle microtubules to kinetochore	http://amigo.geneontology.org/amigo/term/GO:0008608	32	6	0.481569	12.4593	7.16373e-06	0.00096318	891;4751;9212;10615;11004;83540	geneontology_Biological_Process	AURKB;KIF2C;CCNB1;NUF2;SPAG5;NEK2
GO:0015631	tubulin binding	http://amigo.geneontology.org/amigo/term/GO:0015631	321	17	4.83074	3.51913	7.86374e-06	0.00104486	332;2010;2597;3797;5347;8480;8766;9141;10615;10634;11004;11261;11337;22919;24137;56992;81610	geneontology_Molecular_Function	GABARAP;KIF3C;RAB11A;CHP1;GAS2L1;KIF2C;PDCD5;RAE1;MAPRE1;EMD;FAM83D;BIRC5;GAPDH;SPAG5;KIF15;KIF4A;PLK1
GO:0061982	meiosis I cell cycle process	http://amigo.geneontology.org/amigo/term/GO:0061982	116	10	1.74569	5.7284	1.01219e-05	0.00132043	995;1164;5347;6790;7153;9232;9319;9700;25788;146956	geneontology_Biological_Process	CDC25C;AURKA;TRIP13;PTTG1;TOP2A;ESPL1;EME1;CKS2;PLK1;RAD54B
GO:0006259	DNA metabolic process	http://amigo.geneontology.org/amigo/term/GO:0006259	970	33	14.5976	2.26065	1.01715e-05	0.00132043	86;990;1063;1111;1643;1736;1789;2305;4171;4176;4678;4751;4998;5984;7083;7153;7516;8208;8438;9156;9212;9232;9319;9837;10635;10721;25788;29089;79000;79075;79991;113130;146956	geneontology_Biological_Process	DKC1;STN1;AURKB;DDB2;TRIP13;FOXM1;PTTG1;RAD54L;DSCC1;TOP2A;DNMT3B;EXO1;MCM7;NASP;GINS1;RAD51AP1;AUNIP;CDCA5;CHAF1B;EME1;MCM2;ORC1;RFC4;TK1;ACTL6A;CENPF;CHEK1;NEK2;POLQ;RAD54B;UBE2T;XRCC2;CDC6
GO:0044380	protein localization to cytoskeleton	http://amigo.geneontology.org/amigo/term/GO:0044380	53	7	0.797599	8.77634	1.37909e-05	0.00176994	6790;7272;10615;22919;54443;58489;81610	geneontology_Biological_Process	ABHD17C;AURKA;MAPRE1;FAM83D;SPAG5;TTK;ANLN
GO:1904668	positive regulation of ubiquitin protein ligase activity	http://amigo.geneontology.org/amigo/term/GO:1904668	12	4	0.180588	22.1498	2.25732e-05	0.00286452	991;5347;11065;27338	geneontology_Biological_Process	UBE2C;CDC20;UBE2S;PLK1
GO:0031570	DNA integrity checkpoint	http://amigo.geneontology.org/amigo/term/GO:0031570	158	11	2.37775	4.62623	2.78848e-05	0.00349924	891;990;995;1111;1869;4998;5347;6790;7153;8682;146956	geneontology_Biological_Process	PEA15;CDC25C;AURKA;E2F1;CCNB1;TOP2A;EME1;ORC1;CHEK1;PLK1;CDC6
GO:0051307	meiotic chromosome separation	http://amigo.geneontology.org/amigo/term/GO:0051307	25	5	0.376226	13.2899	3.08681e-05	0.00383104	7153;7272;9700;23397;146956	geneontology_Biological_Process	TOP2A;NCAPH;ESPL1;EME1;TTK
GO:0003723	RNA binding	http://amigo.geneontology.org/amigo/term/GO:0003723	1603	45	24.1236	1.86539	3.18646e-05	0.00391172	311;1153;1736;1915;3185;4234;4939;5710;6122;6520;6628;6637;6638;6737;7098;7153;8480;8662;8894;9238;10073;10289;10614;10635;10643;10644;10849;22913;22919;23185;51191;51497;55094;55192;55272;55299;55323;55661;55922;56267;84319;84545;92312;201299;404734	geneontology_Molecular_Function	KYAT3;EIF1B;HNRNPF;SNUPN;GPATCH1;NKRF;HEXIM1;IMP3;SLC3A2;SNRPN;ANXA11;DKC1;MEX3A;MRPL43;RDM1;RPL3;TRIM21;CD3EAP;EEF1A1;TLR3;DNAJC17;EIF3B;HERC5;LARP4B;LARP6;OAS2;NELFCD;DDX27;RALY;EIF2S2;RAE1;TOP2A;MAPRE1;PSMD4;IGF2BP3;RAD51AP1;SNRPB;SNRPG;CIRBP;CMSS1;IGF2BP2;METTL1;ANKHD1-EIF4EBP3;TBRG4;BRIX1
GO:0006974	cellular response to DNA damage stimulus	http://amigo.geneontology.org/amigo/term/GO:0006974	806	28	12.1295	2.30842	3.46687e-05	0.00421019	86;891;995;1111;1643;1869;2305;4176;5347;5984;6790;7153;7516;8208;8438;8682;9156;9232;9319;10635;10721;11335;25788;29089;79000;113130;132671;146956	geneontology_Biological_Process	PEA15;CDC25C;DDB2;AURKA;TRIP13;E2F1;CCNB1;FOXM1;PTTG1;RAD54L;SPATA18;TOP2A;EXO1;MCM7;CBX3;RAD51AP1;AUNIP;CDCA5;CHAF1B;EME1;RFC4;ACTL6A;CHEK1;PLK1;POLQ;RAD54B;UBE2T;XRCC2
GO:0007127	meiosis I	http://amigo.geneontology.org/amigo/term/GO:0007127	111	9	1.67044	5.38779	4.58896e-05	0.00551359	1164;5347;6790;7153;9232;9319;9700;25788;146956	geneontology_Biological_Process	AURKA;TRIP13;PTTG1;TOP2A;ESPL1;EME1;CKS2;PLK1;RAD54B
GO:0008094	DNA-dependent ATPase activity	http://amigo.geneontology.org/amigo/term/GO:0008094	87	8	1.30927	6.11029	4.958e-05	0.00589428	4176;5984;7153;7516;10721;25788;54821;79075	geneontology_Molecular_Function	DSCC1;ERCC6L;TOP2A;MCM7;RFC4;POLQ;RAD54B;XRCC2
GO:0035639	purine ribonucleoside triphosphate binding	http://amigo.geneontology.org/amigo/term/GO:0035639	1786	48	26.8776	1.78588	5.03147e-05	0.00591932	537;699;990;1111;1716;1915;2773;3654;3797;4171;4176;4751;4939;4998;5347;5701;5873;5984;6790;7083;7153;7272;7516;8153;8438;8766;9212;9319;9630;10054;10721;11004;11065;22929;22974;24137;25788;27338;29089;54821;54981;55661;55930;56681;56992;57761;118424;375449	geneontology_Molecular_Function	RAB27A;BUB1;SAR1A;MAST4;UBA2;UBE2J2;EEF1A1;KIF3C;RAB11A;RND2;SEPHS1;ATP6AP1;AURKB;GNA14;GNAI3;MYO5C;NMRK1;OAS2;TPX2;UBE2C;AURKA;TRIP13;DDX27;KIF2C;UBE2S;RAD54L;ERCC6L;TOP2A;MCM7;DGUOK;TRIB3;MCM2;ORC1;PSMC2;RFC4;TK1;TTK;CHEK1;IRAK1;KIF15;KIF4A;NEK2;PLK1;POLQ;RAD54B;UBE2T;XRCC2;CDC6
GO:1901989	positive regulation of cell cycle phase transition	http://amigo.geneontology.org/amigo/term/GO:1901989	88	8	1.32432	6.04086	5.38372e-05	0.00626843	891;990;995;8766;9700;11065;81610;113130	geneontology_Biological_Process	CDC25C;RAB11A;UBE2C;CCNB1;ESPL1;FAM83D;CDCA5;CDC6
hsa03050	Proteasome	http://www.kegg.jp/kegg-bin/show_pathway?hsa03050+11047+5688+5690+5701+5710+7979	45	6	0.677207	8.85993	5.46604e-05	0.00629933	11047;5688;5690;5701;5710;7979	pathway_KEGG	SEM1;ADRM1;PSMD4;PSMA7;PSMC2;PSMB2
GO:0006323	DNA packaging	http://amigo.geneontology.org/amigo/term/GO:0006323	171	11	2.57339	4.27453	5.76174e-05	0.00656381	891;1058;4171;4678;7153;8208;23397;23522;55355;55839;113130	geneontology_Biological_Process	CENPA;HJURP;KAT6B;CCNB1;TOP2A;NASP;NCAPH;CDCA5;CHAF1B;MCM2;CENPN
GO:0006260	DNA replication	http://amigo.geneontology.org/amigo/term/GO:0006260	268	14	4.03314	3.47124	5.81177e-05	0.00656381	990;1111;4171;4176;4678;4998;5984;8208;9156;9837;10721;79075;79991;146956	geneontology_Biological_Process	STN1;DSCC1;EXO1;MCM7;NASP;GINS1;CHAF1B;EME1;MCM2;ORC1;RFC4;CHEK1;POLQ;CDC6
GO:0090068	positive regulation of cell cycle process	http://amigo.geneontology.org/amigo/term/GO:0090068	270	14	4.06324	3.44553	6.29602e-05	0.00704032	891;990;995;1869;6790;8766;9212;9700;10615;11065;25886;29899;81610;113130	geneontology_Biological_Process	CDC25C;RAB11A;AURKB;UBE2C;AURKA;E2F1;CCNB1;ESPL1;FAM83D;CDCA5;SPAG5;GPSM2;POC1A;CDC6
GO:0016321	female meiosis chromosome segregation	http://amigo.geneontology.org/amigo/term/GO:0016321	6	3	0.0902942	33.2247	6.51809e-05	0.00721719	5347;7272;23397	geneontology_Biological_Process	NCAPH;TTK;PLK1
GO:0005524	ATP binding	http://amigo.geneontology.org/amigo/term/GO:0005524	1453	41	21.8662	1.87504	6.72442e-05	0.00737336	537;699;990;1111;1716;3654;3797;4171;4176;4751;4939;4998;5347;5701;5984;6790;7083;7153;7272;7516;8438;9212;9319;10054;10721;11004;11065;22929;22974;24137;25788;27338;29089;54821;54981;55661;55930;56992;57761;118424;375449	geneontology_Molecular_Function	BUB1;MAST4;UBA2;UBE2J2;KIF3C;SEPHS1;ATP6AP1;AURKB;MYO5C;NMRK1;OAS2;TPX2;UBE2C;AURKA;TRIP13;DDX27;KIF2C;UBE2S;RAD54L;ERCC6L;TOP2A;MCM7;DGUOK;TRIB3;MCM2;ORC1;PSMC2;RFC4;TK1;TTK;CHEK1;IRAK1;KIF15;KIF4A;NEK2;PLK1;POLQ;RAD54B;UBE2T;XRCC2;CDC6
GO:0007080	mitotic metaphase plate congression	http://amigo.geneontology.org/amigo/term/GO:0007080	47	6	0.707305	8.48291	7.02683e-05	0.00763087	891;8766;11004;55143;83540;113130	geneontology_Biological_Process	RAB11A;KIF2C;CCNB1;NUF2;CDCA8;CDCA5
GO:0033365	protein localization to organelle	http://amigo.geneontology.org/amigo/term/GO:0033365	888	29	13.3635	2.17008	7.54476e-05	0.00811529	30;847;1058;1434;1736;1869;4000;5347;6122;6790;7272;8766;9141;9212;10005;10073;10134;10615;11261;22919;54443;54708;58489;81610;113130;118424;140823;202018;221496	geneontology_Biological_Process	TAPT1;SNUPN;MARCH5;CAT;CENPA;DKC1;RPL3;UBE2J2;LMNA;RAB11A;ABHD17C;ACAA1;AURKB;CHP1;LEMD2;AURKA;E2F1;ACOT8;CSE1L;PDCD5;ROMO1;MAPRE1;FAM83D;CDCA5;SPAG5;TTK;BCAP31;PLK1;ANLN
GO:0072698	protein localization to microtubule cytoskeleton	http://amigo.geneontology.org/amigo/term/GO:0072698	48	6	0.722354	8.30618	7.93033e-05	0.00844954	6790;7272;10615;22919;58489;81610	geneontology_Biological_Process	ABHD17C;AURKA;MAPRE1;FAM83D;SPAG5;TTK
GO:0006998	nuclear envelope organization	http://amigo.geneontology.org/amigo/term/GO:0006998	49	6	0.737403	8.13667	8.92401e-05	0.00941942	891;2010;4000;5347;9133;221496	geneontology_Biological_Process	LMNA;LEMD2;CCNB1;EMD;PLK1;CCNB2
GO:0035173	histone kinase activity	http://amigo.geneontology.org/amigo/term/GO:0035173	17	4	0.255834	15.6352	0.000102276	0.0106954	891;1111;6790;9212	geneontology_Molecular_Function	AURKB;AURKA;CCNB1;CHEK1
GO:0051443	positive regulation of ubiquitin-protein transferase activity	http://amigo.geneontology.org/amigo/term/GO:0051443	32	5	0.481569	10.3827	0.00010735	0.011123	991;5347;11065;27338;57761	geneontology_Biological_Process	UBE2C;CDC20;UBE2S;TRIB3;PLK1
hsa04114	Oocyte meiosis	http://www.kegg.jp/kegg-bin/show_pathway?hsa04114+5347+6790+699+891+9133+9232+9700+991+995	124	9	1.86608	4.82294	0.000108773	0.011168	5347;6790;699;891;9133;9232;9700;991;995	pathway_KEGG	BUB1;CDC25C;CDC20;AURKA;CCNB1;PTTG1;ESPL1;PLK1;CCNB2
GO:0140097	catalytic activity, acting on DNA	http://amigo.geneontology.org/amigo/term/GO:0140097	184	11	2.76902	3.97252	0.000111274	0.0113219	1736;1789;4176;7153;8438;9156;9837;10721;25788;54821;146956	geneontology_Molecular_Function	DKC1;RAD54L;ERCC6L;TOP2A;DNMT3B;EXO1;MCM7;GINS1;EME1;POLQ;RAD54B
GO:0061575	cyclin-dependent protein serine/threonine kinase activator activity	http://amigo.geneontology.org/amigo/term/GO:0061575	7	3	0.105343	28.4783	0.000112796	0.0113743	891;1163;1164	geneontology_Molecular_Function	CCNB1;CKS1B;CKS2
GO:0051640	organelle localization	http://amigo.geneontology.org/amigo/term/GO:0051640	686	24	10.3236	2.32476	0.000115536	0.0115474	537;891;1058;1063;3797;4751;5347;5873;6790;8120;8766;8775;9700;10615;10652;11004;22919;29899;55143;56681;81610;83540;113130;259266	geneontology_Biological_Process	RAB27A;SAR1A;CENPA;KIF3C;NAPA;RAB11A;ASPM;ATP6AP1;AURKA;KIF2C;CCNB1;NUF2;MAPRE1;CDCA8;ESPL1;FAM83D;YKT6;AP3B2;CDCA5;SPAG5;CENPF;GPSM2;NEK2;PLK1
GO:0032555	purine ribonucleotide binding	http://amigo.geneontology.org/amigo/term/GO:0032555	1850	48	27.8407	1.72409	0.000119305	0.0117863	537;699;990;1111;1716;1915;2773;3654;3797;4171;4176;4751;4939;4998;5347;5701;5873;5984;6790;7083;7153;7272;7516;8153;8438;8766;9212;9319;9630;10054;10721;11004;11065;22929;22974;24137;25788;27338;29089;54821;54981;55661;55930;56681;56992;57761;118424;375449	geneontology_Molecular_Function	RAB27A;BUB1;SAR1A;MAST4;UBA2;UBE2J2;EEF1A1;KIF3C;RAB11A;RND2;SEPHS1;ATP6AP1;AURKB;GNA14;GNAI3;MYO5C;NMRK1;OAS2;TPX2;UBE2C;AURKA;TRIP13;DDX27;KIF2C;UBE2S;RAD54L;ERCC6L;TOP2A;MCM7;DGUOK;TRIB3;MCM2;ORC1;PSMC2;RFC4;TK1;TTK;CHEK1;IRAK1;KIF15;KIF4A;NEK2;PLK1;POLQ;RAD54B;UBE2T;XRCC2;CDC6
GO:0006302	double-strand break repair	http://amigo.geneontology.org/amigo/term/GO:0006302	218	12	3.28069	3.65777	0.000120013	0.0117863	1111;2305;7516;8438;9156;9319;10635;10721;25788;79000;113130;146956	geneontology_Biological_Process	TRIP13;FOXM1;RAD54L;EXO1;RAD51AP1;AUNIP;CDCA5;EME1;CHEK1;POLQ;RAD54B;XRCC2
GO:1901992	positive regulation of mitotic cell cycle phase transition	http://amigo.geneontology.org/amigo/term/GO:1901992	74	7	1.11363	6.28576	0.000123091	0.0119844	891;990;995;8766;9700;11065;113130	geneontology_Biological_Process	CDC25C;RAB11A;UBE2C;CCNB1;ESPL1;CDCA5;CDC6
GO:0017076	purine nucleotide binding	http://amigo.geneontology.org/amigo/term/GO:0017076	1865	48	28.0665	1.71023	0.000144757	0.013855	537;699;990;1111;1716;1915;2773;3654;3797;4171;4176;4751;4939;4998;5347;5701;5873;5984;6790;7083;7153;7272;7516;8153;8438;8766;9212;9319;9630;10054;10721;11004;11065;22929;22974;24137;25788;27338;29089;54821;54981;55661;55930;56681;56992;57761;118424;375449	geneontology_Molecular_Function	RAB27A;BUB1;SAR1A;MAST4;UBA2;UBE2J2;EEF1A1;KIF3C;RAB11A;RND2;SEPHS1;ATP6AP1;AURKB;GNA14;GNAI3;MYO5C;NMRK1;OAS2;TPX2;UBE2C;AURKA;TRIP13;DDX27;KIF2C;UBE2S;RAD54L;ERCC6L;TOP2A;MCM7;DGUOK;TRIB3;MCM2;ORC1;PSMC2;RFC4;TK1;TTK;CHEK1;IRAK1;KIF15;KIF4A;NEK2;PLK1;POLQ;RAD54B;UBE2T;XRCC2;CDC6
GO:0032553	ribonucleotide binding	http://amigo.geneontology.org/amigo/term/GO:0032553	1865	48	28.0665	1.71023	0.000144757	0.013855	537;699;990;1111;1716;1915;2773;3654;3797;4171;4176;4751;4939;4998;5347;5701;5873;5984;6790;7083;7153;7272;7516;8153;8438;8766;9212;9319;9630;10054;10721;11004;11065;22929;22974;24137;25788;27338;29089;54821;54981;55661;55930;56681;56992;57761;118424;375449	geneontology_Molecular_Function	RAB27A;BUB1;SAR1A;MAST4;UBA2;UBE2J2;EEF1A1;KIF3C;RAB11A;RND2;SEPHS1;ATP6AP1;AURKB;GNA14;GNAI3;MYO5C;NMRK1;OAS2;TPX2;UBE2C;AURKA;TRIP13;DDX27;KIF2C;UBE2S;RAD54L;ERCC6L;TOP2A;MCM7;DGUOK;TRIB3;MCM2;ORC1;PSMC2;RFC4;TK1;TTK;CHEK1;IRAK1;KIF15;KIF4A;NEK2;PLK1;POLQ;RAD54B;UBE2T;XRCC2;CDC6
GO:0000910	cytokinesis	http://amigo.geneontology.org/amigo/term/GO:0000910	159	10	2.3928	4.17921	0.000150386	0.0142728	311;990;1058;5347;6790;8766;9212;9700;24137;54443	geneontology_Biological_Process	ANXA11;CENPA;RAB11A;AURKB;AURKA;ESPL1;KIF4A;PLK1;ANLN;CDC6
GO:0032559	adenyl ribonucleotide binding	http://amigo.geneontology.org/amigo/term/GO:0032559	1509	41	22.709	1.80545	0.00015336	0.0144337	537;699;990;1111;1716;3654;3797;4171;4176;4751;4939;4998;5347;5701;5984;6790;7083;7153;7272;7516;8438;9212;9319;10054;10721;11004;11065;22929;22974;24137;25788;27338;29089;54821;54981;55661;55930;56992;57761;118424;375449	geneontology_Molecular_Function	BUB1;MAST4;UBA2;UBE2J2;KIF3C;SEPHS1;ATP6AP1;AURKB;MYO5C;NMRK1;OAS2;TPX2;UBE2C;AURKA;TRIP13;DDX27;KIF2C;UBE2S;RAD54L;ERCC6L;TOP2A;MCM7;DGUOK;TRIB3;MCM2;ORC1;PSMC2;RFC4;TK1;TTK;CHEK1;IRAK1;KIF15;KIF4A;NEK2;PLK1;POLQ;RAD54B;UBE2T;XRCC2;CDC6
GO:0007062	sister chromatid cohesion	http://amigo.geneontology.org/amigo/term/GO:0007062	55	6	0.827697	7.24903	0.000171575	0.0160146	699;991;5347;9700;79075;113130	geneontology_Biological_Process	BUB1;CDC20;DSCC1;ESPL1;CDCA5;PLK1
GO:0010997	anaphase-promoting complex binding	http://amigo.geneontology.org/amigo/term/GO:0010997	8	3	0.120392	24.9185	0.000178465	0.0165212	991;5347;27338	geneontology_Molecular_Function	CDC20;UBE2S;PLK1
GO:0030554	adenyl nucleotide binding	http://amigo.geneontology.org/amigo/term/GO:0030554	1522	41	22.9046	1.79003	0.000184109	0.0168651	537;699;990;1111;1716;3654;3797;4171;4176;4751;4939;4998;5347;5701;5984;6790;7083;7153;7272;7516;8438;9212;9319;10054;10721;11004;11065;22929;22974;24137;25788;27338;29089;54821;54981;55661;55930;56992;57761;118424;375449	geneontology_Molecular_Function	BUB1;MAST4;UBA2;UBE2J2;KIF3C;SEPHS1;ATP6AP1;AURKB;MYO5C;NMRK1;OAS2;TPX2;UBE2C;AURKA;TRIP13;DDX27;KIF2C;UBE2S;RAD54L;ERCC6L;TOP2A;MCM7;DGUOK;TRIB3;MCM2;ORC1;PSMC2;RFC4;TK1;TTK;CHEK1;IRAK1;KIF15;KIF4A;NEK2;PLK1;POLQ;RAD54B;UBE2T;XRCC2;CDC6
GO:0051656	establishment of organelle localization	http://amigo.geneontology.org/amigo/term/GO:0051656	494	19	7.43422	2.55575	0.000185167	0.0168651	537;891;1058;1063;3797;5873;8120;8766;8775;9700;10615;10652;11004;29899;55143;56681;81610;83540;113130	geneontology_Biological_Process	RAB27A;SAR1A;CENPA;KIF3C;NAPA;RAB11A;ATP6AP1;KIF2C;CCNB1;NUF2;CDCA8;ESPL1;FAM83D;YKT6;AP3B2;CDCA5;SPAG5;CENPF;GPSM2
GO:0044774	mitotic DNA integrity checkpoint	http://amigo.geneontology.org/amigo/term/GO:0044774	106	8	1.5952	5.01505	0.000200208	0.0180892	891;990;995;1869;4998;6790;7153;146956	geneontology_Biological_Process	CDC25C;AURKA;E2F1;CCNB1;TOP2A;EME1;ORC1;CDC6
GO:1902750	negative regulation of cell cycle G2/M phase transition	http://amigo.geneontology.org/amigo/term/GO:1902750	57	6	0.857795	6.99468	0.000209449	0.018774	990;1111;4998;5347;6790;9212	geneontology_Biological_Process	AURKB;AURKA;ORC1;CHEK1;PLK1;CDC6
GO:0034502	protein localization to chromosome	http://amigo.geneontology.org/amigo/term/GO:0034502	81	7	1.21897	5.74254	0.000217532	0.0193449	1058;1736;5347;7272;9212;113130;221496	geneontology_Biological_Process	CENPA;DKC1;AURKB;LEMD2;CDCA5;TTK;PLK1
GO:1904666	regulation of ubiquitin protein ligase activity	http://amigo.geneontology.org/amigo/term/GO:1904666	21	4	0.31603	12.657	0.000245286	0.0214749	991;5347;11065;27338	geneontology_Biological_Process	UBE2C;CDC20;UBE2S;PLK1
GO:0051383	kinetochore organization	http://amigo.geneontology.org/amigo/term/GO:0051383	21	4	0.31603	12.657	0.000245286	0.0214749	1058;1063;55839;83540	geneontology_Biological_Process	CENPA;NUF2;CENPF;CENPN
GO:0065004	protein-DNA complex assembly	http://amigo.geneontology.org/amigo/term/GO:0065004	206	11	3.1001	3.54827	0.000298175	0.0259045	1058;1063;1643;1810;4171;4678;5701;8208;23522;55355;55839	geneontology_Biological_Process	DR1;CENPA;HJURP;DDB2;KAT6B;NASP;CHAF1B;MCM2;PSMC2;CENPF;CENPN
GO:0010638	positive regulation of organelle organization	http://amigo.geneontology.org/amigo/term/GO:0010638	600	21	9.02942	2.32573	0.000308811	0.0266238	891;1736;1789;1869;4000;4751;6790;9141;9212;9700;10615;11065;22919;25886;29899;54708;57708;113130;118424;122953;202018	geneontology_Biological_Process	TAPT1;MARCH5;DKC1;UBE2J2;LMNA;MIER1;AURKB;JDP2;UBE2C;AURKA;E2F1;CCNB1;PDCD5;DNMT3B;MAPRE1;ESPL1;CDCA5;SPAG5;GPSM2;NEK2;POC1A
GO:0070507	regulation of microtubule cytoskeleton organization	http://amigo.geneontology.org/amigo/term/GO:0070507	175	10	2.63358	3.79711	0.000326815	0.0279624	1111;4751;5347;6790;8480;10615;22919;22974;25886;29899	geneontology_Biological_Process	TPX2;AURKA;RAE1;MAPRE1;SPAG5;CHEK1;GPSM2;NEK2;PLK1;POC1A
GO:0045737	positive regulation of cyclin-dependent protein serine/threonine kinase activity	http://amigo.geneontology.org/amigo/term/GO:0045737	23	4	0.346128	11.5564	0.000354419	0.0299293	891;990;1163;1164	geneontology_Biological_Process	CCNB1;CKS1B;CKS2;CDC6
GO:0090224	regulation of spindle organization	http://amigo.geneontology.org/amigo/term/GO:0090224	41	5	0.61701	8.10359	0.000357753	0.0299293	5347;8480;10615;22974;29899	geneontology_Biological_Process	TPX2;RAE1;SPAG5;GPSM2;PLK1
hsa03440	Homologous recombination	http://www.kegg.jp/kegg-bin/show_pathway?hsa03440+146956+25788+7516+7979+8438	41	5	0.61701	8.10359	0.000357753	0.0299293	146956;25788;7516;7979;8438	pathway_KEGG	SEM1;RAD54L;EME1;RAD54B;XRCC2
GO:0034622	cellular protein-containing complex assembly	http://amigo.geneontology.org/amigo/term/GO:0034622	1073	31	16.1476	1.91979	0.000377342	0.0313361	1058;1063;1153;1643;1810;4171;4678;5701;5710;6122;6628;6637;7417;8208;8662;8775;9777;10073;11047;11065;22919;23522;27338;50853;51103;54443;55299;55355;55839;56681;84079	geneontology_Biological_Process	SNUPN;DR1;SAR1A;VDAC2;CENPA;RPL3;HJURP;NAPA;VILL;ANKRD27;DDB2;EIF3B;KAT6B;NDUFAF1;UBE2C;ADRM1;UBE2S;MAPRE1;NASP;PSMD4;SNRPB;SNRPG;CHAF1B;CIRBP;MCM2;PSMC2;CENPF;CENPN;TM9SF4;ANLN;BRIX1
GO:0034508	centromere complex assembly	http://amigo.geneontology.org/amigo/term/GO:0034508	42	5	0.63206	7.91065	0.000401157	0.0330706	1058;1063;4678;55355;55839	geneontology_Biological_Process	CENPA;HJURP;NASP;CENPF;CENPN
GO:0006261	DNA-dependent DNA replication	http://amigo.geneontology.org/amigo/term/GO:0006261	148	9	2.22726	4.04084	0.000411012	0.0334705	990;4171;4176;4998;5984;9837;10721;79075;146956	geneontology_Biological_Process	DSCC1;MCM7;GINS1;EME1;MCM2;ORC1;RFC4;POLQ;CDC6
GO:0017111	nucleoside-triphosphatase activity	http://amigo.geneontology.org/amigo/term/GO:0017111	840	26	12.6412	2.05677	0.000411935	0.0334705	537;1915;2773;3797;4171;4176;5701;5873;5984;7153;7516;8153;8438;8766;9630;9837;10721;11004;24137;25788;54821;55661;55930;56681;56992;79075	geneontology_Molecular_Function	RAB27A;SAR1A;EEF1A1;KIF3C;RAB11A;RND2;ATP6AP1;GNA14;GNAI3;MYO5C;DDX27;KIF2C;RAD54L;DSCC1;ERCC6L;TOP2A;MCM7;GINS1;MCM2;PSMC2;RFC4;KIF15;KIF4A;POLQ;RAD54B;XRCC2
GO:0006338	chromatin remodeling	http://amigo.geneontology.org/amigo/term/GO:0006338	150	9	2.25736	3.98697	0.000453427	0.0364066	86;1058;1111;1810;4678;10014;11335;55355;55839	geneontology_Biological_Process	DR1;CENPA;HJURP;HDAC5;NASP;CBX3;ACTL6A;CENPN;CHEK1
GO:0051338	regulation of transferase activity	http://amigo.geneontology.org/amigo/term/GO:0051338	940	28	14.1461	1.97934	0.000454518	0.0364066	891;990;991;995;1033;1163;1164;1736;1846;1848;3654;4751;5347;5984;7098;7410;8682;9133;9212;9306;10614;11065;11261;22974;27338;51191;57761;79075	geneontology_Biological_Process	PEA15;HEXIM1;DKC1;DUSP4;CDC25C;SOCS6;TLR3;VAV2;AURKB;CHP1;DUSP6;HERC5;TPX2;UBE2C;CDC20;CCNB1;UBE2S;DSCC1;CDKN3;CKS1B;TRIB3;RFC4;CKS2;IRAK1;NEK2;PLK1;CCNB2;CDC6
GO:0010498	proteasomal protein catabolic process	http://amigo.geneontology.org/amigo/term/GO:0010498	449	17	6.75702	2.5159	0.000481562	0.0383011	891;991;5347;5688;5690;5701;5710;6790;9212;9232;9306;10134;11065;26234;27338;57761;118424	geneontology_Biological_Process	UBE2J2;SOCS6;AURKB;FBXL5;UBE2C;CDC20;AURKA;CCNB1;UBE2S;PTTG1;PSMD4;TRIB3;PSMA7;PSMC2;BCAP31;PLK1;PSMB2
GO:0035404	histone-serine phosphorylation	http://amigo.geneontology.org/amigo/term/GO:0035404	11	3	0.165539	18.1226	0.000508496	0.0398817	891;6790;9212	geneontology_Biological_Process	AURKB;AURKA;CCNB1
GO:0009157	deoxyribonucleoside monophosphate biosynthetic process	http://amigo.geneontology.org/amigo/term/GO:0009157	11	3	0.165539	18.1226	0.000508496	0.0398817	1635;1716;7083	geneontology_Biological_Process	DCTD;DGUOK;TK1
GO:0008144	drug binding	http://amigo.geneontology.org/amigo/term/GO:0008144	1707	43	25.6887	1.67389	0.000531226	0.041377	537;699;990;1111;1716;3654;3797;4171;4176;4751;4939;4998;5347;5701;5984;6790;7083;7153;7272;7516;8438;9212;9319;10054;10721;11004;11065;22929;22974;24137;25788;27338;29089;54821;54981;55661;55930;56267;56992;57761;60681;118424;375449	geneontology_Molecular_Function	KYAT3;BUB1;MAST4;UBA2;UBE2J2;KIF3C;SEPHS1;ATP6AP1;AURKB;FKBP10;MYO5C;NMRK1;OAS2;TPX2;UBE2C;AURKA;TRIP13;DDX27;KIF2C;UBE2S;RAD54L;ERCC6L;TOP2A;MCM7;DGUOK;TRIB3;MCM2;ORC1;PSMC2;RFC4;TK1;TTK;CHEK1;IRAK1;KIF15;KIF4A;NEK2;PLK1;POLQ;RAD54B;UBE2T;XRCC2;CDC6
GO:0016538	cyclin-dependent protein serine/threonine kinase regulator activity	http://amigo.geneontology.org/amigo/term/GO:0016538	45	5	0.677207	7.38327	0.000555398	0.0429634	891;1163;1164;9133;10614	geneontology_Molecular_Function	HEXIM1;CCNB1;CKS1B;CKS2;CCNB2
GO:0070925	organelle assembly	http://amigo.geneontology.org/amigo/term/GO:0070925	858	26	12.9121	2.01362	0.000565806	0.0434708	991;1058;1063;1153;1951;3797;3983;4605;4751;5347;6122;6790;8766;9212;10615;11337;22919;22974;24137;25886;29899;54443;55299;55839;202018;259266	geneontology_Biological_Process	TAPT1;CELSR3;CENPA;RPL3;GABARAP;KIF3C;RAB11A;ABLIM1;ASPM;AURKB;TPX2;MYBL2;CDC20;AURKA;MAPRE1;CIRBP;SPAG5;CENPF;CENPN;GPSM2;KIF4A;NEK2;PLK1;POC1A;ANLN;BRIX1
GO:1904031	positive regulation of cyclin-dependent protein kinase activity	http://amigo.geneontology.org/amigo/term/GO:1904031	27	4	0.406324	9.84436	0.000670003	0.050482	891;990;1163;1164	geneontology_Biological_Process	CCNB1;CKS1B;CKS2;CDC6
GO:0051988	regulation of attachment of spindle microtubules to kinetochore	http://amigo.geneontology.org/amigo/term/GO:0051988	12	3	0.180588	16.6124	0.000670471	0.050482	891;4751;10615	geneontology_Biological_Process	CCNB1;SPAG5;NEK2
GO:0007077	mitotic nuclear envelope disassembly	http://amigo.geneontology.org/amigo/term/GO:0007077	12	3	0.180588	16.6124	0.000670471	0.050482	891;5347;9133	geneontology_Biological_Process	CCNB1;PLK1;CCNB2
GO:0051129	negative regulation of cellular component organization	http://amigo.geneontology.org/amigo/term/GO:0051129	684	22	10.2935	2.13726	0.00069803	0.0522089	699;891;991;1063;1111;1716;1789;4000;4171;4751;5347;7153;7272;7417;9212;9232;9319;9700;22919;50853;79991;84079	geneontology_Biological_Process	BUB1;VDAC2;LMNA;STN1;VILL;ANKRD27;AURKB;CDC20;TRIP13;CCNB1;PTTG1;TOP2A;DNMT3B;MAPRE1;DGUOK;ESPL1;MCM2;TTK;CENPF;CHEK1;NEK2;PLK1
hsa04914	Progesterone-mediated oocyte maturation	http://www.kegg.jp/kegg-bin/show_pathway?hsa04914+2773+5347+6790+699+891+9133+995	99	7	1.48985	4.69845	0.000740744	0.0550392	2773;5347;6790;699;891;9133;995	pathway_KEGG	BUB1;CDC25C;GNAI3;AURKA;CCNB1;PLK1;CCNB2
GO:0051445	regulation of meiotic cell cycle	http://amigo.geneontology.org/amigo/term/GO:0051445	48	5	0.722354	6.92182	0.000750378	0.0553907	991;995;7272;9319;259266	geneontology_Biological_Process	CDC25C;ASPM;CDC20;TRIP13;TTK
GO:0006281	DNA repair	http://amigo.geneontology.org/amigo/term/GO:0006281	511	18	7.69006	2.34068	0.000768625	0.0563692	86;1111;1643;2305;5984;7516;8208;8438;9156;9232;9319;10635;10721;25788;29089;79000;113130;146956	geneontology_Biological_Process	DDB2;TRIP13;FOXM1;PTTG1;RAD54L;EXO1;RAD51AP1;AUNIP;CDCA5;CHAF1B;EME1;RFC4;ACTL6A;CHEK1;POLQ;RAD54B;UBE2T;XRCC2
GO:0072401	signal transduction involved in DNA integrity checkpoint	http://amigo.geneontology.org/amigo/term/GO:0072401	73	6	1.09858	5.4616	0.00080423	0.0582242	891;995;1111;1869;5347;6790	geneontology_Biological_Process	CDC25C;AURKA;E2F1;CCNB1;CHEK1;PLK1
GO:0072422	signal transduction involved in DNA damage checkpoint	http://amigo.geneontology.org/amigo/term/GO:0072422	73	6	1.09858	5.4616	0.00080423	0.0582242	891;995;1111;1869;5347;6790	geneontology_Biological_Process	CDC25C;AURKA;E2F1;CCNB1;CHEK1;PLK1
GO:0043161	proteasome-mediated ubiquitin-dependent protein catabolic process	http://amigo.geneontology.org/amigo/term/GO:0043161	389	15	5.85408	2.56232	0.000853728	0.0598881	891;991;5347;5688;5690;5710;6790;9212;9232;10134;11065;26234;27338;57761;118424	geneontology_Biological_Process	UBE2J2;AURKB;FBXL5;UBE2C;CDC20;AURKA;CCNB1;UBE2S;PTTG1;PSMD4;TRIB3;PSMA7;BCAP31;PLK1;PSMB2
GO:0070647	protein modification by small protein conjugation or removal	http://amigo.geneontology.org/amigo/term/GO:0070647	1028	29	15.4704	1.87455	0.000854154	0.0598881	86;991;1643;5347;5688;5690;5701;5710;6737;9306;10054;10293;11047;11065;11261;26234;26994;27338;29089;51191;54708;57761;80013;83461;112950;118424;142686;220213;389856	geneontology_Biological_Process	MARCH5;USP27X;RNF11;TRIM21;UBA2;UBE2J2;ASB14;MINDY3;SOCS6;CHP1;DDB2;FBXL5;HERC5;MED8;OTUD1;UBE2C;CDC20;CDCA3;ADRM1;UBE2S;PSMD4;TRAIP;TRIB3;PSMA7;PSMC2;ACTL6A;PLK1;PSMB2;UBE2T
GO:0000212	meiotic spindle organization	http://amigo.geneontology.org/amigo/term/GO:0000212	13	3	0.195637	15.3345	0.000861946	0.0598881	6790;9700;259266	geneontology_Biological_Process	ASPM;AURKA;ESPL1
GO:0007100	mitotic centrosome separation	http://amigo.geneontology.org/amigo/term/GO:0007100	13	3	0.195637	15.3345	0.000861946	0.0598881	1111;4751;6790	geneontology_Biological_Process	AURKA;CHEK1;NEK2
GO:0070863	positive regulation of protein exit from endoplasmic reticulum	http://amigo.geneontology.org/amigo/term/GO:0070863	13	3	0.195637	15.3345	0.000861946	0.0598881	9777;10134;56681	geneontology_Biological_Process	SAR1A;BCAP31;TM9SF4
GO:2001252	positive regulation of chromosome organization	http://amigo.geneontology.org/amigo/term/GO:2001252	164	9	2.46804	3.64662	0.000862285	0.0598881	891;1736;1789;4000;4751;9212;9700;57708;122953	geneontology_Biological_Process	DKC1;LMNA;MIER1;AURKB;JDP2;CCNB1;DNMT3B;ESPL1;NEK2
GO:0072395	signal transduction involved in cell cycle checkpoint	http://amigo.geneontology.org/amigo/term/GO:0072395	74	6	1.11363	5.38779	0.000864331	0.0598881	891;995;1111;1869;5347;6790	geneontology_Biological_Process	CDC25C;AURKA;E2F1;CCNB1;CHEK1;PLK1
GO:0016579	protein deubiquitination	http://amigo.geneontology.org/amigo/term/GO:0016579	272	12	4.09334	2.93159	0.000890602	0.0613321	86;991;1643;5688;5690;5701;5710;6737;11047;80013;220213;389856	geneontology_Biological_Process	USP27X;TRIM21;MINDY3;DDB2;OTUD1;CDC20;ADRM1;PSMD4;PSMA7;PSMC2;ACTL6A;PSMB2
GO:0007292	female gamete generation	http://amigo.geneontology.org/amigo/term/GO:0007292	133	8	2.00152	3.99696	0.000918962	0.0625489	891;5347;6790;7153;7272;9319;23397;259266	geneontology_Biological_Process	ASPM;AURKA;TRIP13;CCNB1;TOP2A;NCAPH;TTK;PLK1
GO:0006310	DNA recombination	http://amigo.geneontology.org/amigo/term/GO:0006310	273	12	4.10839	2.92085	0.000919348	0.0625489	86;1111;7153;7516;8438;9156;9319;10635;10721;25788;79000;146956	geneontology_Biological_Process	TRIP13;RAD54L;TOP2A;EXO1;RAD51AP1;AUNIP;EME1;ACTL6A;CHEK1;POLQ;RAD54B;XRCC2
GO:0032392	DNA geometric change	http://amigo.geneontology.org/amigo/term/GO:0032392	75	6	1.12868	5.31596	0.000927834	0.0627483	4171;4176;7153;8438;9837;25788	geneontology_Biological_Process	RAD54L;TOP2A;MCM7;GINS1;MCM2;RAD54B
GO:0003682	chromatin binding	http://amigo.geneontology.org/amigo/term/GO:0003682	520	18	7.8255	2.30017	0.000937971	0.0630562	86;1058;1063;1164;1789;4790;4998;7153;8208;9156;10014;10721;23397;23598;29089;113130;116092;122953	geneontology_Molecular_Function	NFKB1;CENPA;HDAC5;JDP2;PATZ1;TOP2A;DNMT3B;EXO1;NCAPH;CDCA5;CHAF1B;DNTTIP1;ORC1;ACTL6A;CENPF;CKS2;POLQ;UBE2T
hsa05169	Epstein-Barr virus infection	http://www.kegg.jp/kegg-bin/show_pathway?hsa05169+11047+1643+1869+29760+3654+4790+4939+5701+5710+7979	201	10	3.02486	3.30594	0.00096228	0.0643076	11047;1643;1869;29760;3654;4790;4939;5701;5710;7979	pathway_KEGG	BLNK;NFKB1;DDB2;OAS2;SEM1;E2F1;ADRM1;PSMD4;PSMC2;IRAK1
GO:0016462	pyrophosphatase activity	http://amigo.geneontology.org/amigo/term/GO:0016462	891	26	13.4087	1.93904	0.00098222	0.0652541	537;1915;2773;3797;4171;4176;5701;5873;5984;7153;7516;8153;8438;8766;9630;9837;10721;11004;24137;25788;54821;55661;55930;56681;56992;79075	geneontology_Molecular_Function	RAB27A;SAR1A;EEF1A1;KIF3C;RAB11A;RND2;ATP6AP1;GNA14;GNAI3;MYO5C;DDX27;KIF2C;RAD54L;DSCC1;ERCC6L;TOP2A;MCM7;GINS1;MCM2;PSMC2;RFC4;KIF15;KIF4A;POLQ;RAD54B;XRCC2
GO:0010458	exit from mitosis	http://amigo.geneontology.org/amigo/term/GO:0010458	30	4	0.451471	8.85993	0.00100986	0.0662221	11065;27338;54443;113130	geneontology_Biological_Process	UBE2C;UBE2S;CDCA5;ANLN
GO:0016817	hydrolase activity, acting on acid anhydrides	http://amigo.geneontology.org/amigo/term/GO:0016817	893	26	13.4388	1.9347	0.00101438	0.0662221	537;1915;2773;3797;4171;4176;5701;5873;5984;7153;7516;8153;8438;8766;9630;9837;10721;11004;24137;25788;54821;55661;55930;56681;56992;79075	geneontology_Molecular_Function	RAB27A;SAR1A;EEF1A1;KIF3C;RAB11A;RND2;ATP6AP1;GNA14;GNAI3;MYO5C;DDX27;KIF2C;RAD54L;DSCC1;ERCC6L;TOP2A;MCM7;GINS1;MCM2;PSMC2;RFC4;KIF15;KIF4A;POLQ;RAD54B;XRCC2
GO:0016818	hydrolase activity, acting on acid anhydrides, in phosphorus-containing anhydrides	http://amigo.geneontology.org/amigo/term/GO:0016818	893	26	13.4388	1.9347	0.00101438	0.0662221	537;1915;2773;3797;4171;4176;5701;5873;5984;7153;7516;8153;8438;8766;9630;9837;10721;11004;24137;25788;54821;55661;55930;56681;56992;79075	geneontology_Molecular_Function	RAB27A;SAR1A;EEF1A1;KIF3C;RAB11A;RND2;ATP6AP1;GNA14;GNAI3;MYO5C;DDX27;KIF2C;RAD54L;DSCC1;ERCC6L;TOP2A;MCM7;GINS1;MCM2;PSMC2;RFC4;KIF15;KIF4A;POLQ;RAD54B;XRCC2
GO:1903829	positive regulation of cellular protein localization	http://amigo.geneontology.org/amigo/term/GO:1903829	317	13	4.77054	2.72506	0.00107667	0.0688341	1736;1869;2010;5347;8766;9141;9777;10134;11261;29899;56681;58489;118424	geneontology_Biological_Process	SAR1A;DKC1;UBE2J2;RAB11A;ABHD17C;CHP1;E2F1;PDCD5;EMD;BCAP31;GPSM2;PLK1;TM9SF4
GO:0032886	regulation of microtubule-based process	http://amigo.geneontology.org/amigo/term/GO:0032886	204	10	3.07	3.25733	0.00107677	0.0688341	1111;4751;5347;6790;8480;10615;22919;22974;25886;29899	geneontology_Biological_Process	TPX2;AURKA;RAE1;MAPRE1;SPAG5;CHEK1;GPSM2;NEK2;PLK1;POC1A
GO:0051299	centrosome separation	http://amigo.geneontology.org/amigo/term/GO:0051299	14	3	0.210687	14.2392	0.00108486	0.0688341	1111;4751;6790	geneontology_Biological_Process	AURKA;CHEK1;NEK2
GO:0009162	deoxyribonucleoside monophosphate metabolic process	http://amigo.geneontology.org/amigo/term/GO:0009162	14	3	0.210687	14.2392	0.00108486	0.0688341	1635;1716;7083	geneontology_Biological_Process	DCTD;DGUOK;TK1
GO:0043142	single-stranded DNA-dependent ATPase activity	http://amigo.geneontology.org/amigo/term/GO:0043142	14	3	0.210687	14.2392	0.00108486	0.0688341	5984;10721;79075	geneontology_Molecular_Function	DSCC1;RFC4;POLQ
GO:0044093	positive regulation of molecular function	http://amigo.geneontology.org/amigo/term/GO:0044093	1717	42	25.8392	1.62544	0.00111291	0.0702188	847;891;990;991;1163;1164;1736;1848;2773;3654;4258;4751;4790;5347;5984;6737;7098;7410;8682;8775;9141;9212;9610;10014;10054;10134;11047;11065;11261;22919;22974;23397;27338;55323;55635;55789;57761;79075;84079;113130;129049;375704	geneontology_Biological_Process	MGST2;PEA15;NFKB1;CAT;DKC1;RIN1;SGSM1;TRIM21;UBA2;ENHO;NAPA;TLR3;VAV2;ANKRD27;AURKB;CHP1;DUSP6;GNAI3;HDAC5;LARP6;TPX2;UBE2C;CDC20;ADRM1;DEPDC1;CCNB1;UBE2S;PDCD5;DSCC1;MAPRE1;NCAPH;CKS1B;TRIB3;CDCA5;RFC4;BCAP31;CKS2;DEPDC1B;IRAK1;NEK2;PLK1;CDC6
GO:0071824	protein-DNA complex subunit organization	http://amigo.geneontology.org/amigo/term/GO:0071824	242	11	3.64187	3.02043	0.00113845	0.0711074	1058;1063;1643;1810;4171;4678;5701;8208;23522;55355;55839	geneontology_Biological_Process	DR1;CENPA;HJURP;DDB2;KAT6B;NASP;CHAF1B;MCM2;PSMC2;CENPF;CENPN
GO:0034080	CENP-A containing nucleosome assembly	http://amigo.geneontology.org/amigo/term/GO:0034080	31	4	0.46652	8.57412	0.00114588	0.0711074	1058;4678;55355;55839	geneontology_Biological_Process	CENPA;HJURP;NASP;CENPN
GO:0061641	CENP-A containing chromatin organization	http://amigo.geneontology.org/amigo/term/GO:0061641	31	4	0.46652	8.57412	0.00114588	0.0711074	1058;4678;55355;55839	geneontology_Biological_Process	CENPA;HJURP;NASP;CENPN
GO:0019900	kinase binding	http://amigo.geneontology.org/amigo/term/GO:0019900	711	22	10.6999	2.0561	0.00115327	0.0711752	891;990;995;1163;1164;1869;1915;2305;5347;6790;7153;8153;9133;9212;10014;11261;22919;22974;29760;57761;81610;259266	geneontology_Molecular_Function	BLNK;CDC25C;EEF1A1;RND2;ASPM;AURKB;CHP1;HDAC5;TPX2;AURKA;E2F1;CCNB1;FOXM1;TOP2A;MAPRE1;CKS1B;FAM83D;TRIB3;CKS2;PLK1;CCNB2;CDC6
GO:0051438	regulation of ubiquitin-protein transferase activity	http://amigo.geneontology.org/amigo/term/GO:0051438	53	5	0.797599	6.26881	0.00118315	0.0726223	991;5347;11065;27338;57761	geneontology_Biological_Process	UBE2C;CDC20;UBE2S;TRIB3;PLK1
GO:0006270	DNA replication initiation	http://amigo.geneontology.org/amigo/term/GO:0006270	32	4	0.481569	8.30618	0.00129424	0.0788786	990;4171;4176;4998	geneontology_Biological_Process	MCM7;MCM2;ORC1;CDC6
GO:0032088	negative regulation of NF-kappaB transcription factor activity	http://amigo.geneontology.org/amigo/term/GO:0032088	80	6	1.20392	4.98371	0.00130094	0.0788786	847;3654;6737;10293;11261;149951	geneontology_Biological_Process	CAT;TRIM21;CHP1;TRAIP;COMMD7;IRAK1
GO:0006334	nucleosome assembly	http://amigo.geneontology.org/amigo/term/GO:0006334	109	7	1.64034	4.2674	0.00130603	0.0788786	1058;4171;4678;8208;23522;55355;55839	geneontology_Biological_Process	CENPA;HJURP;KAT6B;NASP;CHAF1B;MCM2;CENPN
GO:0051347	positive regulation of transferase activity	http://amigo.geneontology.org/amigo/term/GO:0051347	626	20	9.4207	2.12299	0.00131719	0.0791294	891;990;991;1163;1164;1736;1848;3654;4751;5347;5984;7098;7410;8682;9212;11065;22974;27338;57761;79075	geneontology_Biological_Process	PEA15;DKC1;TLR3;VAV2;AURKB;DUSP6;TPX2;UBE2C;CDC20;CCNB1;UBE2S;DSCC1;CKS1B;TRIB3;RFC4;CKS2;IRAK1;NEK2;PLK1;CDC6
GO:0019206	nucleoside kinase activity	http://amigo.geneontology.org/amigo/term/GO:0019206	15	3	0.225736	13.2899	0.00134106	0.079743	1716;7083;54981	geneontology_Molecular_Function	NMRK1;DGUOK;TK1
GO:0044843	cell cycle G1/S phase transition	http://amigo.geneontology.org/amigo/term/GO:0044843	247	11	3.71711	2.95929	0.00134152	0.079743	891;990;995;1033;1869;4171;4176;4678;4998;6790;81610	geneontology_Biological_Process	CDC25C;AURKA;E2F1;CCNB1;MCM7;NASP;CDKN3;FAM83D;MCM2;ORC1;CDC6
GO:0051098	regulation of binding	http://amigo.geneontology.org/amigo/term/GO:0051098	367	14	5.523	2.53486	0.0013962	0.0825583	166;1869;4751;5347;6790;8904;9212;10014;22919;55323;55355;57761;113130;375704	geneontology_Biological_Process	AES;ENHO;HJURP;AURKB;HDAC5;LARP6;AURKA;E2F1;CPNE1;MAPRE1;TRIB3;CDCA5;NEK2;PLK1
GO:0070646	protein modification by small protein removal	http://amigo.geneontology.org/amigo/term/GO:0070646	288	12	4.33412	2.76873	0.00145222	0.0854238	86;991;1643;5688;5690;5701;5710;6737;11047;80013;220213;389856	geneontology_Biological_Process	USP27X;TRIM21;MINDY3;DDB2;OTUD1;CDC20;ADRM1;PSMD4;PSMA7;PSMC2;ACTL6A;PSMB2
GO:0006511	ubiquitin-dependent protein catabolic process	http://amigo.geneontology.org/amigo/term/GO:0006511	588	19	8.84883	2.14718	0.00152154	0.0889967	891;991;5347;5688;5690;5701;5710;6790;9212;9232;10134;11047;11065;26234;26994;27338;57761;118424;389856	geneontology_Biological_Process	USP27X;RNF11;UBE2J2;AURKB;FBXL5;UBE2C;CDC20;AURKA;ADRM1;CCNB1;UBE2S;PTTG1;PSMD4;TRIB3;PSMA7;PSMC2;BCAP31;PLK1;PSMB2
GO:0032479	regulation of type I interferon production	http://amigo.geneontology.org/amigo/term/GO:0032479	112	7	1.68549	4.15309	0.00152872	0.0889967	3654;4790;6737;7098;10293;10623;51191	geneontology_Biological_Process	NFKB1;POLR3C;TRIM21;TLR3;HERC5;TRAIP;IRAK1
GO:0032606	type I interferon production	http://amigo.geneontology.org/amigo/term/GO:0032606	113	7	1.70054	4.11634	0.00160917	0.0921747	3654;4790;6737;7098;10293;10623;51191	geneontology_Biological_Process	NFKB1;POLR3C;TRIM21;TLR3;HERC5;TRAIP;IRAK1
GO:0031055	chromatin remodeling at centromere	http://amigo.geneontology.org/amigo/term/GO:0031055	34	4	0.511667	7.81758	0.00163029	0.0921747	1058;4678;55355;55839	geneontology_Biological_Process	CENPA;HJURP;NASP;CENPN
GO:0030952	establishment or maintenance of cytoskeleton polarity	http://amigo.geneontology.org/amigo/term/GO:0030952	16	3	0.240785	12.4593	0.00163228	0.0921747	4000;8153;11004	geneontology_Biological_Process	LMNA;RND2;KIF2C
GO:0030397	membrane disassembly	http://amigo.geneontology.org/amigo/term/GO:0030397	16	3	0.240785	12.4593	0.00163228	0.0921747	891;5347;9133	geneontology_Biological_Process	CCNB1;PLK1;CCNB2
GO:0051081	nuclear envelope disassembly	http://amigo.geneontology.org/amigo/term/GO:0051081	16	3	0.240785	12.4593	0.00163228	0.0921747	891;5347;9133	geneontology_Biological_Process	CCNB1;PLK1;CCNB2
GO:0051382	kinetochore assembly	http://amigo.geneontology.org/amigo/term/GO:0051382	16	3	0.240785	12.4593	0.00163228	0.0921747	1058;1063;55839	geneontology_Biological_Process	CENPA;CENPF;CENPN
GO:0000077	DNA damage checkpoint	http://amigo.geneontology.org/amigo/term/GO:0000077	146	8	2.19716	3.64107	0.00167246	0.0939742	891;995;1111;1869;5347;6790;8682;146956	geneontology_Biological_Process	PEA15;CDC25C;AURKA;E2F1;CCNB1;EME1;CHEK1;PLK1
GO:0019941	modification-dependent protein catabolic process	http://amigo.geneontology.org/amigo/term/GO:0019941	594	19	8.93913	2.12549	0.00170792	0.0954915	891;991;5347;5688;5690;5701;5710;6790;9212;9232;10134;11047;11065;26234;26994;27338;57761;118424;389856	geneontology_Biological_Process	USP27X;RNF11;UBE2J2;AURKB;FBXL5;UBE2C;CDC20;AURKA;ADRM1;CCNB1;UBE2S;PTTG1;PSMD4;TRIB3;PSMA7;PSMC2;BCAP31;PLK1;PSMB2
GO:0045931	positive regulation of mitotic cell cycle	http://amigo.geneontology.org/amigo/term/GO:0045931	147	8	2.21221	3.6163	0.00174621	0.0971515	891;990;995;6790;8766;9700;11065;113130	geneontology_Biological_Process	CDC25C;RAB11A;UBE2C;AURKA;CCNB1;ESPL1;CDCA5;CDC6
GO:0006325	chromatin organization	http://amigo.geneontology.org/amigo/term/GO:0006325	741	22	11.1513	1.97286	0.00193937	0.107369	86;891;1058;1111;1643;1789;1810;4000;4171;4678;6790;8208;9212;10014;11335;23522;55257;55355;55839;57708;84661;122953	geneontology_Biological_Process	DR1;CENPA;HJURP;LMNA;MIER1;AURKB;DDB2;HDAC5;JDP2;KAT6B;AURKA;MRGBP;CCNB1;DNMT3B;NASP;CBX3;CHAF1B;DPY30;MCM2;ACTL6A;CENPN;CHEK1
GO:0003688	DNA replication origin binding	http://amigo.geneontology.org/amigo/term/GO:0003688	17	3	0.255834	11.7264	0.00196013	0.107989	990;4171;4998	geneontology_Molecular_Function	MCM2;ORC1;CDC6
GO:0043632	modification-dependent macromolecule catabolic process	http://amigo.geneontology.org/amigo/term/GO:0043632	605	19	9.10467	2.08684	0.00210014	0.115141	891;991;5347;5688;5690;5701;5710;6790;9212;9232;10134;11047;11065;26234;26994;27338;57761;118424;389856	geneontology_Biological_Process	USP27X;RNF11;UBE2J2;AURKB;FBXL5;UBE2C;CDC20;AURKA;ADRM1;CCNB1;UBE2S;PTTG1;PSMD4;TRIB3;PSMA7;PSMC2;BCAP31;PLK1;PSMB2
GO:0000724	double-strand break repair via homologous recombination	http://amigo.geneontology.org/amigo/term/GO:0000724	119	7	1.79084	3.90879	0.00216348	0.116938	1111;7516;8438;10635;10721;25788;79000	geneontology_Biological_Process	RAD54L;RAD51AP1;AUNIP;CHEK1;POLQ;RAD54B;XRCC2
GO:1905832	positive regulation of spindle assembly	http://amigo.geneontology.org/amigo/term/GO:1905832	5	2	0.0752452	26.5798	0.00218972	0.116938	10615;29899	geneontology_Biological_Process	SPAG5;GPSM2
GO:1905462	regulation of DNA duplex unwinding	http://amigo.geneontology.org/amigo/term/GO:1905462	5	2	0.0752452	26.5798	0.00218972	0.116938	4171;7153	geneontology_Biological_Process	TOP2A;MCM2
GO:0031536	positive regulation of exit from mitosis	http://amigo.geneontology.org/amigo/term/GO:0031536	5	2	0.0752452	26.5798	0.00218972	0.116938	11065;113130	geneontology_Biological_Process	UBE2C;CDCA5
GO:0044314	protein K27-linked ubiquitination	http://amigo.geneontology.org/amigo/term/GO:0044314	5	2	0.0752452	26.5798	0.00218972	0.116938	27338;29089	geneontology_Biological_Process	UBE2S;UBE2T
GO:0007010	cytoskeleton organization	http://amigo.geneontology.org/amigo/term/GO:0007010	1300	33	19.5637	1.68679	0.00219505	0.116938	891;991;1058;1111;2597;3983;4000;4605;4751;5347;6790;7272;7516;8153;8480;8766;9212;9700;10615;11004;11261;11337;22919;22974;24137;25886;29899;50853;54443;79000;83540;259266;375449	geneontology_Biological_Process	CENPA;MAST4;GABARAP;LMNA;RAB11A;RND2;VILL;ABLIM1;ASPM;AURKB;CHP1;TPX2;MYBL2;CDC20;AURKA;KIF2C;CCNB1;RAE1;NUF2;MAPRE1;ESPL1;AUNIP;GAPDH;SPAG5;TTK;CHEK1;GPSM2;KIF4A;NEK2;PLK1;POC1A;XRCC2;ANLN
GO:0071897	DNA biosynthetic process	http://amigo.geneontology.org/amigo/term/GO:0071897	188	9	2.82922	3.18109	0.00222449	0.117735	1063;1736;4751;5984;7083;9212;10721;79075;79991	geneontology_Biological_Process	DKC1;STN1;AURKB;DSCC1;RFC4;TK1;CENPF;NEK2;POLQ
GO:0060236	regulation of mitotic spindle organization	http://amigo.geneontology.org/amigo/term/GO:0060236	37	4	0.556814	7.18372	0.00224127	0.117735	5347;8480;22974;29899	geneontology_Biological_Process	TPX2;RAE1;GPSM2;PLK1
GO:0061631	ubiquitin conjugating enzyme activity	http://amigo.geneontology.org/amigo/term/GO:0061631	37	4	0.556814	7.18372	0.00224127	0.117735	11065;27338;29089;118424	geneontology_Molecular_Function	UBE2J2;UBE2C;UBE2S;UBE2T
GO:0000725	recombinational repair	http://amigo.geneontology.org/amigo/term/GO:0000725	120	7	1.80588	3.87622	0.00226865	0.118621	1111;7516;8438;10635;10721;25788;79000	geneontology_Biological_Process	RAD54L;RAD51AP1;AUNIP;CHEK1;POLQ;RAD54B;XRCC2
GO:0007096	regulation of exit from mitosis	http://amigo.geneontology.org/amigo/term/GO:0007096	18	3	0.270883	11.0749	0.00232617	0.121068	11065;54443;113130	geneontology_Biological_Process	UBE2C;CDCA5;ANLN
GO:0016572	histone phosphorylation	http://amigo.geneontology.org/amigo/term/GO:0016572	38	4	0.571863	6.99468	0.00247571	0.12826	891;1111;6790;9212	geneontology_Biological_Process	AURKB;AURKA;CCNB1;CHEK1
GO:0044265	cellular macromolecule catabolic process	http://amigo.geneontology.org/amigo/term/GO:0044265	1108	29	16.6743	1.7392	0.00263212	0.13574	891;991;1153;1736;1869;4939;5347;5688;5690;5701;5710;6122;6790;9212;9232;9238;9306;10134;10643;10644;11047;11065;26234;26994;27338;57761;118424;132671;389856	geneontology_Biological_Process	USP27X;DKC1;RNF11;RPL3;UBE2J2;SOCS6;AURKB;FBXL5;OAS2;UBE2C;CDC20;AURKA;E2F1;ADRM1;CCNB1;UBE2S;PTTG1;SPATA18;PSMD4;IGF2BP3;TRIB3;CIRBP;IGF2BP2;PSMA7;PSMC2;BCAP31;PLK1;PSMB2;TBRG4
GO:0061650	ubiquitin-like protein conjugating enzyme activity	http://amigo.geneontology.org/amigo/term/GO:0061650	39	4	0.586912	6.81533	0.00272645	0.139966	11065;27338;29089;118424	geneontology_Molecular_Function	UBE2J2;UBE2C;UBE2S;UBE2T
GO:0000082	G1/S transition of mitotic cell cycle	http://amigo.geneontology.org/amigo/term/GO:0000082	232	10	3.49138	2.8642	0.00278162	0.142152	891;990;995;1033;1869;4171;4176;4678;4998;6790	geneontology_Biological_Process	CDC25C;AURKA;E2F1;CCNB1;MCM7;NASP;CDKN3;MCM2;ORC1;CDC6
GO:0051865	protein autoubiquitination	http://amigo.geneontology.org/amigo/term/GO:0051865	65	5	0.978187	5.1115	0.00294302	0.148654	1643;6737;26994;29089;54708	geneontology_Biological_Process	MARCH5;RNF11;TRIM21;DDB2;UBE2T
GO:0032508	DNA duplex unwinding	http://amigo.geneontology.org/amigo/term/GO:0032508	65	5	0.978187	5.1115	0.00294302	0.148654	4171;4176;7153;9837;25788	geneontology_Biological_Process	TOP2A;MCM7;GINS1;MCM2;RAD54B
hsa04218	Cellular senescence	http://www.kegg.jp/kegg-bin/show_pathway?hsa04218+1111+1869+2305+4605+4790+7417+891+9133	160	8	2.40785	3.32247	0.00295975	0.148654	1111;1869;2305;4605;4790;7417;891;9133	pathway_KEGG	NFKB1;VDAC2;MYBL2;E2F1;CCNB1;FOXM1;CHEK1;CCNB2
GO:0032182	ubiquitin-like protein binding	http://amigo.geneontology.org/amigo/term/GO:0032182	94	6	1.41461	4.24145	0.00296151	0.148654	1163;1164;7153;8480;10054;11047	geneontology_Molecular_Function	UBA2;ADRM1;RAE1;TOP2A;CKS1B;CKS2
GO:0006336	DNA replication-independent nucleosome assembly	http://amigo.geneontology.org/amigo/term/GO:0006336	40	4	0.601961	6.64494	0.00299406	0.149623	1058;4678;55355;55839	geneontology_Biological_Process	CENPA;HJURP;NASP;CENPN
GO:0030234	enzyme regulator activity	http://amigo.geneontology.org/amigo/term/GO:0030234	1017	27	15.3049	1.76414	0.00303555	0.15064	332;891;991;1163;1164;1992;2597;3654;4258;9133;9141;9232;9306;9610;10054;10614;10776;11047;11261;23397;29899;55635;55789;56925;57761;84079;129049	geneontology_Molecular_Function	MGST2;SERPINB1;HEXIM1;RIN1;SGSM1;UBA2;LXN;SOCS6;ANKRD27;ARPP19;CHP1;CDC20;ADRM1;DEPDC1;CCNB1;PDCD5;PTTG1;NCAPH;CKS1B;TRIB3;BIRC5;GAPDH;CKS2;DEPDC1B;GPSM2;IRAK1;CCNB2
GO:0043085	positive regulation of catalytic activity	http://amigo.geneontology.org/amigo/term/GO:0043085	1380	34	20.7677	1.63716	0.00304108	0.15064	891;990;991;1163;1164;1736;1848;2773;3654;4258;4751;5347;5984;7098;7410;8682;8775;9141;9212;9610;10054;10134;11047;11065;22974;23397;27338;55635;55789;57761;79075;84079;129049;375704	geneontology_Biological_Process	MGST2;PEA15;DKC1;RIN1;SGSM1;UBA2;ENHO;NAPA;TLR3;VAV2;ANKRD27;AURKB;DUSP6;GNAI3;TPX2;UBE2C;CDC20;ADRM1;DEPDC1;CCNB1;UBE2S;PDCD5;DSCC1;NCAPH;CKS1B;TRIB3;RFC4;BCAP31;CKS2;DEPDC1B;IRAK1;NEK2;PLK1;CDC6
GO:2000573	positive regulation of DNA biosynthetic process	http://amigo.geneontology.org/amigo/term/GO:2000573	66	5	0.993236	5.03405	0.00314584	0.15497	1736;4751;5984;9212;79075	geneontology_Biological_Process	DKC1;AURKB;DSCC1;RFC4;NEK2
GO:0090306	spindle assembly involved in meiosis	http://amigo.geneontology.org/amigo/term/GO:0090306	6	2	0.0902942	22.1498	0.00325199	0.15497	6790;259266	geneontology_Biological_Process	ASPM;AURKA
GO:0010994	free ubiquitin chain polymerization	http://amigo.geneontology.org/amigo/term/GO:0010994	6	2	0.0902942	22.1498	0.00325199	0.15497	11065;27338	geneontology_Biological_Process	UBE2C;UBE2S
GO:0051661	maintenance of centrosome location	http://amigo.geneontology.org/amigo/term/GO:0051661	6	2	0.0902942	22.1498	0.00325199	0.15497	29899;259266	geneontology_Biological_Process	ASPM;GPSM2
GO:0035519	protein K29-linked ubiquitination	http://amigo.geneontology.org/amigo/term/GO:0035519	6	2	0.0902942	22.1498	0.00325199	0.15497	27338;29089	geneontology_Biological_Process	UBE2S;UBE2T
GO:1900262	regulation of DNA-directed DNA polymerase activity	http://amigo.geneontology.org/amigo/term/GO:1900262	6	2	0.0902942	22.1498	0.00325199	0.15497	5984;79075	geneontology_Biological_Process	DSCC1;RFC4
GO:1900264	positive regulation of DNA-directed DNA polymerase activity	http://amigo.geneontology.org/amigo/term/GO:1900264	6	2	0.0902942	22.1498	0.00325199	0.15497	5984;79075	geneontology_Biological_Process	DSCC1;RFC4
GO:0015616	DNA translocase activity	http://amigo.geneontology.org/amigo/term/GO:0015616	6	2	0.0902942	22.1498	0.00325199	0.15497	25788;54821	geneontology_Molecular_Function	ERCC6L;RAD54B
GO:0035174	histone serine kinase activity	http://amigo.geneontology.org/amigo/term/GO:0035174	6	2	0.0902942	22.1498	0.00325199	0.15497	6790;9212	geneontology_Molecular_Function	AURKB;AURKA
GO:0034724	DNA replication-independent nucleosome organization	http://amigo.geneontology.org/amigo/term/GO:0034724	41	4	0.61701	6.48287	0.00327907	0.155604	1058;4678;55355;55839	geneontology_Biological_Process	CENPA;HJURP;NASP;CENPN
GO:0019901	protein kinase binding	http://amigo.geneontology.org/amigo/term/GO:0019901	631	19	9.49594	2.00085	0.00333845	0.157759	891;995;1163;1164;1869;1915;2305;5347;6790;7153;8153;9133;10014;22919;22974;29760;57761;81610;259266	geneontology_Molecular_Function	BLNK;CDC25C;EEF1A1;RND2;ASPM;HDAC5;TPX2;AURKA;E2F1;CCNB1;FOXM1;TOP2A;MAPRE1;CKS1B;FAM83D;TRIB3;CKS2;PLK1;CCNB2
GO:0031497	chromatin assembly	http://amigo.geneontology.org/amigo/term/GO:0031497	129	7	1.94133	3.60578	0.00340235	0.160109	1058;4171;4678;8208;23522;55355;55839	geneontology_Biological_Process	CENPA;HJURP;KAT6B;NASP;CHAF1B;MCM2;CENPN
GO:0009057	macromolecule catabolic process	http://amigo.geneontology.org/amigo/term/GO:0009057	1338	33	20.1356	1.63889	0.00344522	0.161454	891;991;1153;1736;1869;1915;4939;5347;5688;5690;5701;5710;6122;6790;9212;9232;9238;9306;10134;10643;10644;11047;11065;11261;26234;26994;27338;57761;58489;81610;118424;132671;389856	geneontology_Biological_Process	USP27X;DKC1;RNF11;RPL3;UBE2J2;EEF1A1;SOCS6;ABHD17C;AURKB;CHP1;FBXL5;OAS2;UBE2C;CDC20;AURKA;E2F1;ADRM1;CCNB1;UBE2S;PTTG1;SPATA18;PSMD4;FAM83D;IGF2BP3;TRIB3;CIRBP;IGF2BP2;PSMA7;PSMC2;BCAP31;PLK1;PSMB2;TBRG4
GO:0043044	ATP-dependent chromatin remodeling	http://amigo.geneontology.org/amigo/term/GO:0043044	68	5	1.02333	4.88599	0.00358142	0.1658	86;1058;4678;55355;55839	geneontology_Biological_Process	CENPA;HJURP;NASP;ACTL6A;CENPN
GO:0030261	chromosome condensation	http://amigo.geneontology.org/amigo/term/GO:0030261	42	4	0.63206	6.32852	0.003582	0.1658	891;7153;23397;113130	geneontology_Biological_Process	CCNB1;TOP2A;NCAPH;CDCA5
GO:0051653	spindle localization	http://amigo.geneontology.org/amigo/term/GO:0051653	42	4	0.63206	6.32852	0.003582	0.1658	1058;9700;29899;259266	geneontology_Biological_Process	CENPA;ASPM;ESPL1;GPSM2
GO:0051603	proteolysis involved in cellular protein catabolic process	http://amigo.geneontology.org/amigo/term/GO:0051603	683	20	10.2785	1.94581	0.00359837	0.165877	891;991;5347;5688;5690;5701;5710;6790;9212;9232;9306;10134;11047;11065;26234;26994;27338;57761;118424;389856	geneontology_Biological_Process	USP27X;RNF11;UBE2J2;SOCS6;AURKB;FBXL5;UBE2C;CDC20;AURKA;ADRM1;CCNB1;UBE2S;PTTG1;PSMD4;TRIB3;PSMA7;PSMC2;BCAP31;PLK1;PSMB2
GO:0061640	cytoskeleton-dependent cytokinesis	http://amigo.geneontology.org/amigo/term/GO:0061640	98	6	1.47481	4.06833	0.00364324	0.167263	1058;5347;9212;9700;24137;54443	geneontology_Biological_Process	CENPA;AURKB;ESPL1;KIF4A;PLK1;ANLN
GO:0042770	signal transduction in response to DNA damage	http://amigo.geneontology.org/amigo/term/GO:0042770	131	7	1.97142	3.55073	0.00370439	0.169382	891;995;1111;1869;2305;5347;6790	geneontology_Biological_Process	CDC25C;AURKA;E2F1;CCNB1;FOXM1;CHEK1;PLK1
GO:2000779	regulation of double-strand break repair	http://amigo.geneontology.org/amigo/term/GO:2000779	69	5	1.03838	4.81518	0.00381471	0.173723	1111;2305;10635;10721;79000	geneontology_Biological_Process	FOXM1;RAD51AP1;AUNIP;CHEK1;POLQ
GO:0016570	histone modification	http://amigo.geneontology.org/amigo/term/GO:0016570	455	15	6.84731	2.19064	0.00387957	0.175344	86;891;1111;1643;1789;1810;4000;6790;9212;10014;23522;55257;57708;84661;122953	geneontology_Biological_Process	DR1;LMNA;MIER1;AURKB;DDB2;HDAC5;JDP2;KAT6B;AURKA;MRGBP;CCNB1;DNMT3B;DPY30;ACTL6A;CHEK1
GO:0044257	cellular protein catabolic process	http://amigo.geneontology.org/amigo/term/GO:0044257	736	21	11.0761	1.89598	0.00388134	0.175344	891;991;5347;5688;5690;5701;5710;6790;9212;9232;9306;10134;11047;11065;26234;26994;27338;57761;118424;132671;389856	geneontology_Biological_Process	USP27X;RNF11;UBE2J2;SOCS6;AURKB;FBXL5;UBE2C;CDC20;AURKA;ADRM1;CCNB1;UBE2S;PTTG1;SPATA18;PSMD4;TRIB3;PSMA7;PSMC2;BCAP31;PLK1;PSMB2
GO:0007063	regulation of sister chromatid cohesion	http://amigo.geneontology.org/amigo/term/GO:0007063	22	3	0.331079	9.06129	0.00419959	0.187471	699;9700;113130	geneontology_Biological_Process	BUB1;ESPL1;CDCA5
GO:0071459	protein localization to chromosome, centromeric region	http://amigo.geneontology.org/amigo/term/GO:0071459	22	3	0.331079	9.06129	0.00419959	0.187471	1058;7272;9212	geneontology_Biological_Process	CENPA;AURKB;TTK
GO:0017025	TBP-class protein binding	http://amigo.geneontology.org/amigo/term/GO:0017025	22	3	0.331079	9.06129	0.00419959	0.187471	1810;3185;5701	geneontology_Molecular_Function	HNRNPF;DR1;PSMC2
GO:0030163	protein catabolic process	http://amigo.geneontology.org/amigo/term/GO:0030163	891	24	13.4087	1.78988	0.0042855	0.190553	891;991;1915;5347;5688;5690;5701;5710;6790;9212;9232;9306;10134;11047;11065;26234;26994;27338;57761;58489;81610;118424;132671;389856	geneontology_Biological_Process	USP27X;RNF11;UBE2J2;EEF1A1;SOCS6;ABHD17C;AURKB;FBXL5;UBE2C;CDC20;AURKA;ADRM1;CCNB1;UBE2S;PTTG1;SPATA18;PSMD4;FAM83D;TRIB3;PSMA7;PSMC2;BCAP31;PLK1;PSMB2
GO:2000113	negative regulation of cellular macromolecule biosynthetic process	http://amigo.geneontology.org/amigo/term/GO:2000113	1359	33	20.4516	1.61356	0.00436761	0.193442	166;332;990;1063;1153;1789;1810;1869;2305;2597;3660;4790;5347;9212;10005;10014;10614;10643;10644;11335;23522;23598;51497;53820;55192;55635;55922;57708;57761;79991;122953;144097;149951	geneontology_Biological_Process	DR1;NKRF;HEXIM1;NFKB1;AES;MIER1;RIPPLY3;STN1;AURKB;DNAJC17;HDAC5;IRF2;JDP2;KAT6B;PATZ1;NELFCD;E2F1;ACOT8;DEPDC1;FOXM1;DNMT3B;CBX3;IGF2BP3;SPINDOC;TRIB3;BIRC5;CIRBP;GAPDH;IGF2BP2;CENPF;COMMD7;PLK1;CDC6
GO:0009120	deoxyribonucleoside metabolic process	http://amigo.geneontology.org/amigo/term/GO:0009120	7	2	0.105343	18.9856	0.00450766	0.197324	1716;7083	geneontology_Biological_Process	DGUOK;TK1
GO:0007084	mitotic nuclear envelope reassembly	http://amigo.geneontology.org/amigo/term/GO:0007084	7	2	0.105343	18.9856	0.00450766	0.197324	2010;4000	geneontology_Biological_Process	LMNA;EMD
GO:0033313	meiotic cell cycle checkpoint	http://amigo.geneontology.org/amigo/term/GO:0033313	7	2	0.105343	18.9856	0.00450766	0.197324	7272;9319	geneontology_Biological_Process	TRIP13;TTK
GO:0010972	negative regulation of G2/M transition of mitotic cell cycle	http://amigo.geneontology.org/amigo/term/GO:0010972	45	4	0.677207	5.90662	0.0046036	0.199207	990;4998;6790;9212	geneontology_Biological_Process	AURKB;AURKA;ORC1;CDC6
GO:0061647	histone H3-K9 modification	http://amigo.geneontology.org/amigo/term/GO:0061647	45	4	0.677207	5.90662	0.0046036	0.199207	1111;1789;4000;10014	geneontology_Biological_Process	LMNA;HDAC5;DNMT3B;CHEK1
GO:0043486	histone exchange	http://amigo.geneontology.org/amigo/term/GO:0043486	45	4	0.677207	5.90662	0.0046036	0.199207	1058;4678;55355;55839	geneontology_Biological_Process	CENPA;HJURP;NASP;CENPN
GO:0007064	mitotic sister chromatid cohesion	http://amigo.geneontology.org/amigo/term/GO:0007064	23	3	0.346128	8.66732	0.00477637	0.205894	991;79075;113130	geneontology_Biological_Process	CDC20;DSCC1;CDCA5
GO:0016569	covalent chromatin modification	http://amigo.geneontology.org/amigo/term/GO:0016569	468	15	7.04295	2.12979	0.00501533	0.215373	86;891;1111;1643;1789;1810;4000;6790;9212;10014;23522;55257;57708;84661;122953	geneontology_Biological_Process	DR1;LMNA;MIER1;AURKB;DDB2;HDAC5;JDP2;KAT6B;AURKA;MRGBP;CCNB1;DNMT3B;DPY30;ACTL6A;CHEK1
GO:0034613	cellular protein localization	http://amigo.geneontology.org/amigo/term/GO:0034613	1815	41	27.314	1.50106	0.00538383	0.22922	30;847;1058;1434;1736;1869;2010;4000;5284;5347;5873;6122;6790;7272;8120;8480;8766;8775;9141;9212;9777;10005;10073;10134;10615;11261;11337;22919;29899;54443;54708;56681;58489;81610;81693;113130;118424;129049;140823;202018;221496	geneontology_Biological_Process	TAPT1;SNUPN;RAB27A;MARCH5;SAR1A;AMN;CAT;CENPA;DKC1;RPL3;SGSM1;UBE2J2;GABARAP;LMNA;NAPA;PIGR;RAB11A;ABHD17C;ACAA1;AURKB;CHP1;LEMD2;AURKA;E2F1;ACOT8;CSE1L;PDCD5;RAE1;ROMO1;MAPRE1;EMD;FAM83D;AP3B2;CDCA5;SPAG5;TTK;BCAP31;GPSM2;PLK1;TM9SF4;ANLN
GO:0051642	centrosome localization	http://amigo.geneontology.org/amigo/term/GO:0051642	24	3	0.361177	8.30618	0.00539866	0.22922	6790;29899;259266	geneontology_Biological_Process	ASPM;AURKA;GPSM2
GO:0048027	mRNA 5'-UTR binding	http://amigo.geneontology.org/amigo/term/GO:0048027	24	3	0.361177	8.30618	0.00539866	0.22922	10643;10644;55323	geneontology_Molecular_Function	LARP6;IGF2BP3;IGF2BP2
GO:2000278	regulation of DNA biosynthetic process	http://amigo.geneontology.org/amigo/term/GO:2000278	108	6	1.6253	3.69164	0.00585171	0.242626	1736;4751;5984;9212;79075;79991	geneontology_Biological_Process	DKC1;STN1;AURKB;DSCC1;RFC4;NEK2
GO:0072331	signal transduction by p53 class mediator	http://amigo.geneontology.org/amigo/term/GO:0072331	218	9	3.28069	2.74333	0.00588655	0.242626	891;995;1111;1869;2305;6790;9212;10614;22974	geneontology_Biological_Process	HEXIM1;CDC25C;AURKB;TPX2;AURKA;E2F1;CCNB1;FOXM1;CHEK1
GO:0070727	cellular macromolecule localization	http://amigo.geneontology.org/amigo/term/GO:0070727	1825	41	27.4645	1.49284	0.00590936	0.242626	30;847;1058;1434;1736;1869;2010;4000;5284;5347;5873;6122;6790;7272;8120;8480;8766;8775;9141;9212;9777;10005;10073;10134;10615;11261;11337;22919;29899;54443;54708;56681;58489;81610;81693;113130;118424;129049;140823;202018;221496	geneontology_Biological_Process	TAPT1;SNUPN;RAB27A;MARCH5;SAR1A;AMN;CAT;CENPA;DKC1;RPL3;SGSM1;UBE2J2;GABARAP;LMNA;NAPA;PIGR;RAB11A;ABHD17C;ACAA1;AURKB;CHP1;LEMD2;AURKA;E2F1;ACOT8;CSE1L;PDCD5;RAE1;ROMO1;MAPRE1;EMD;FAM83D;AP3B2;CDCA5;SPAG5;TTK;BCAP31;GPSM2;PLK1;TM9SF4;ANLN
GO:1903012	positive regulation of bone development	http://amigo.geneontology.org/amigo/term/GO:1903012	8	2	0.120392	16.6124	0.00595073	0.242626	537;202018	geneontology_Biological_Process	TAPT1;ATP6AP1
GO:0085020	protein K6-linked ubiquitination	http://amigo.geneontology.org/amigo/term/GO:0085020	8	2	0.120392	16.6124	0.00595073	0.242626	27338;29089	geneontology_Biological_Process	UBE2S;UBE2T
GO:0044771	meiotic cell cycle phase transition	http://amigo.geneontology.org/amigo/term/GO:0044771	8	2	0.120392	16.6124	0.00595073	0.242626	995;7272	geneontology_Biological_Process	CDC25C;TTK
GO:1901993	regulation of meiotic cell cycle phase transition	http://amigo.geneontology.org/amigo/term/GO:1901993	8	2	0.120392	16.6124	0.00595073	0.242626	995;7272	geneontology_Biological_Process	CDC25C;TTK
GO:0007144	female meiosis I	http://amigo.geneontology.org/amigo/term/GO:0007144	8	2	0.120392	16.6124	0.00595073	0.242626	6790;9319	geneontology_Biological_Process	AURKA;TRIP13
GO:0046602	regulation of mitotic centrosome separation	http://amigo.geneontology.org/amigo/term/GO:0046602	8	2	0.120392	16.6124	0.00595073	0.242626	1111;4751	geneontology_Biological_Process	CHEK1;NEK2
GO:0003689	DNA clamp loader activity	http://amigo.geneontology.org/amigo/term/GO:0003689	8	2	0.120392	16.6124	0.00595073	0.242626	5984;79075	geneontology_Molecular_Function	DSCC1;RFC4
GO:0033170	protein-DNA loading ATPase activity	http://amigo.geneontology.org/amigo/term/GO:0033170	8	2	0.120392	16.6124	0.00595073	0.242626	5984;79075	geneontology_Molecular_Function	DSCC1;RFC4
GO:0061842	microtubule organizing center localization	http://amigo.geneontology.org/amigo/term/GO:0061842	25	3	0.376226	7.97393	0.00606742	0.245554	6790;29899;259266	geneontology_Biological_Process	ASPM;AURKA;GPSM2
GO:0070861	regulation of protein exit from endoplasmic reticulum	http://amigo.geneontology.org/amigo/term/GO:0070861	25	3	0.376226	7.97393	0.00606742	0.245554	9777;10134;56681	geneontology_Biological_Process	SAR1A;BCAP31;TM9SF4
GO:0043130	ubiquitin binding	http://amigo.geneontology.org/amigo/term/GO:0043130	77	5	1.15878	4.3149	0.00608776	0.245554	1163;1164;7153;8480;11047	geneontology_Molecular_Function	ADRM1;RAE1;TOP2A;CKS1B;CKS2
GO:0034728	nucleosome organization	http://amigo.geneontology.org/amigo/term/GO:0034728	144	7	2.16706	3.23018	0.00619147	0.248849	1058;4171;4678;8208;23522;55355;55839	geneontology_Biological_Process	CENPA;HJURP;KAT6B;NASP;CHAF1B;MCM2;CENPN
GO:0016887	ATPase activity	http://amigo.geneontology.org/amigo/term/GO:0016887	438	14	6.59148	2.12395	0.00676349	0.269763	537;3797;4176;5701;5984;7153;7516;10721;11004;24137;25788;54821;56992;79075	geneontology_Molecular_Function	KIF3C;ATP6AP1;KIF2C;DSCC1;ERCC6L;TOP2A;MCM7;PSMC2;RFC4;KIF15;KIF4A;POLQ;RAD54B;XRCC2
GO:0001556	oocyte maturation	http://amigo.geneontology.org/amigo/term/GO:0001556	26	3	0.391275	7.66724	0.00678349	0.269763	891;6790;9319	geneontology_Biological_Process	AURKA;TRIP13;CCNB1
GO:0071168	protein localization to chromatin	http://amigo.geneontology.org/amigo/term/GO:0071168	26	3	0.391275	7.66724	0.00678349	0.269763	5347;113130;221496	geneontology_Biological_Process	LEMD2;CDCA5;PLK1
GO:0032465	regulation of cytokinesis	http://amigo.geneontology.org/amigo/term/GO:0032465	80	5	1.20392	4.15309	0.00714372	0.283092	990;5347;6790;8766;9212	geneontology_Biological_Process	RAB11A;AURKB;AURKA;PLK1;CDC6
GO:0045840	positive regulation of mitotic nuclear division	http://amigo.geneontology.org/amigo/term/GO:0045840	51	4	0.767501	5.21172	0.00719875	0.284275	6790;9700;11065;113130	geneontology_Biological_Process	UBE2C;AURKA;ESPL1;CDCA5
GO:0040001	establishment of mitotic spindle localization	http://amigo.geneontology.org/amigo/term/GO:0040001	27	3	0.406324	7.38327	0.00754767	0.295019	1058;9700;29899	geneontology_Biological_Process	CENPA;ESPL1;GPSM2
GO:0090169	regulation of spindle assembly	http://amigo.geneontology.org/amigo/term/GO:0090169	27	3	0.406324	7.38327	0.00754767	0.295019	5347;10615;29899	geneontology_Biological_Process	SPAG5;GPSM2;PLK1
GO:0010992	ubiquitin recycling	http://amigo.geneontology.org/amigo/term/GO:0010992	9	2	0.135441	14.7665	0.0075753	0.295019	11065;27338	geneontology_Biological_Process	UBE2C;UBE2S
GO:0051256	mitotic spindle midzone assembly	http://amigo.geneontology.org/amigo/term/GO:0051256	9	2	0.135441	14.7665	0.0075753	0.295019	9212;24137	geneontology_Biological_Process	AURKB;KIF4A
GO:0004386	helicase activity	http://amigo.geneontology.org/amigo/term/GO:0004386	150	7	2.25736	3.10097	0.00768757	0.297123	4171;4176;8438;9837;25788;54821;55661	geneontology_Molecular_Function	DDX27;RAD54L;ERCC6L;MCM7;GINS1;MCM2;RAD54B
GO:0007131	reciprocal meiotic recombination	http://amigo.geneontology.org/amigo/term/GO:0007131	52	4	0.78255	5.1115	0.00770826	0.297123	7153;9319;25788;146956	geneontology_Biological_Process	TRIP13;TOP2A;EME1;RAD54B
GO:0035825	homologous recombination	http://amigo.geneontology.org/amigo/term/GO:0035825	52	4	0.78255	5.1115	0.00770826	0.297123	7153;9319;25788;146956	geneontology_Biological_Process	TRIP13;TOP2A;EME1;RAD54B
GO:0008092	cytoskeletal protein binding	http://amigo.geneontology.org/amigo/term/GO:0008092	940	24	14.1461	1.69658	0.00815317	0.313204	332;2010;2597;3797;3983;4790;5347;5873;8480;8766;9141;10615;10634;11004;11261;11337;22919;24137;50853;54443;55323;55930;56992;81610	geneontology_Molecular_Function	RAB27A;NFKB1;GABARAP;KIF3C;RAB11A;VILL;ABLIM1;CHP1;GAS2L1;LARP6;MYO5C;KIF2C;PDCD5;RAE1;MAPRE1;EMD;FAM83D;BIRC5;GAPDH;SPAG5;KIF15;KIF4A;PLK1;ANLN
GO:0051130	positive regulation of cellular component organization	http://amigo.geneontology.org/amigo/term/GO:0051130	1203	29	18.104	1.60186	0.00819595	0.31378	891;991;1643;1736;1789;1869;4000;4751;5701;5873;6790;8153;8766;9141;9212;9700;10615;11065;22919;25886;29899;54443;54708;57708;84079;113130;118424;122953;202018	geneontology_Biological_Process	TAPT1;RAB27A;MARCH5;DKC1;UBE2J2;LMNA;MIER1;RAB11A;RND2;ANKRD27;AURKB;DDB2;JDP2;UBE2C;CDC20;AURKA;E2F1;CCNB1;PDCD5;DNMT3B;MAPRE1;ESPL1;CDCA5;PSMC2;SPAG5;GPSM2;NEK2;POC1A;ANLN
GO:0032210	regulation of telomere maintenance via telomerase	http://amigo.geneontology.org/amigo/term/GO:0032210	53	4	0.797599	5.01505	0.00824092	0.314436	1736;4751;9212;79991	geneontology_Biological_Process	DKC1;STN1;AURKB;NEK2
GO:0010971	positive regulation of G2/M transition of mitotic cell cycle	http://amigo.geneontology.org/amigo/term/GO:0010971	28	3	0.421373	7.11958	0.0083607	0.314752	891;995;8766	geneontology_Biological_Process	CDC25C;RAB11A;CCNB1
GO:0036296	response to increased oxygen levels	http://amigo.geneontology.org/amigo/term/GO:0036296	28	3	0.421373	7.11958	0.0083607	0.314752	537;847;1789	geneontology_Biological_Process	CAT;ATP6AP1;DNMT3B
GO:0000083	regulation of transcription involved in G1/S transition of mitotic cell cycle	http://amigo.geneontology.org/amigo/term/GO:0000083	28	3	0.421373	7.11958	0.0083607	0.314752	990;1869;4998	geneontology_Biological_Process	E2F1;ORC1;CDC6
GO:0051984	positive regulation of chromosome segregation	http://amigo.geneontology.org/amigo/term/GO:0051984	28	3	0.421373	7.11958	0.0083607	0.314752	891;990;9700	geneontology_Biological_Process	CCNB1;ESPL1;CDC6
GO:0071900	regulation of protein serine/threonine kinase activity	http://amigo.geneontology.org/amigo/term/GO:0071900	497	15	7.47937	2.00552	0.00853169	0.320123	891;990;995;1033;1163;1164;1846;1848;3654;5347;8682;9133;10614;51191;57761	geneontology_Biological_Process	PEA15;HEXIM1;DUSP4;CDC25C;DUSP6;HERC5;CCNB1;CDKN3;CKS1B;TRIB3;CKS2;IRAK1;PLK1;CCNB2;CDC6
GO:0033554	cellular response to stress	http://amigo.geneontology.org/amigo/term/GO:0033554	1867	41	28.0966	1.45925	0.00861807	0.322293	86;847;891;995;1111;1643;1789;1869;2305;3654;4000;4176;4790;5347;5984;6790;7098;7153;7516;8208;8324;8438;8682;9156;9232;9319;10134;10634;10635;10721;11335;11337;25788;29089;57761;79000;113130;118424;132671;140823;146956	geneontology_Biological_Process	PEA15;NFKB1;CAT;UBE2J2;CDC25C;GABARAP;LMNA;TLR3;DDB2;FZD7;GAS2L1;AURKA;TRIP13;E2F1;CCNB1;FOXM1;PTTG1;RAD54L;ROMO1;SPATA18;TOP2A;DNMT3B;EXO1;MCM7;CBX3;RAD51AP1;TRIB3;AUNIP;CDCA5;CHAF1B;EME1;RFC4;ACTL6A;BCAP31;CHEK1;IRAK1;PLK1;POLQ;RAD54B;UBE2T;XRCC2
GO:0045143	homologous chromosome segregation	http://amigo.geneontology.org/amigo/term/GO:0045143	54	4	0.812648	4.92218	0.00879715	0.327904	5347;9232;9319;9700	geneontology_Biological_Process	TRIP13;PTTG1;ESPL1;PLK1
GO:0006333	chromatin assembly or disassembly	http://amigo.geneontology.org/amigo/term/GO:0006333	155	7	2.3326	3.00094	0.00912566	0.33903	1058;4171;4678;8208;23522;55355;55839	geneontology_Biological_Process	CENPA;HJURP;KAT6B;NASP;CHAF1B;MCM2;CENPN
GO:0000281	mitotic cytokinesis	http://amigo.geneontology.org/amigo/term/GO:0000281	85	5	1.27917	3.90879	0.00917722	0.339828	1058;5347;9700;24137;54443	geneontology_Biological_Process	CENPA;ESPL1;KIF4A;PLK1;ANLN
GO:0070979	protein K11-linked ubiquitination	http://amigo.geneontology.org/amigo/term/GO:0070979	29	3	0.436422	6.87408	0.00922321	0.340415	11065;27338;29089	geneontology_Biological_Process	UBE2C;UBE2S;UBE2T
GO:0033314	mitotic DNA replication checkpoint	http://amigo.geneontology.org/amigo/term/GO:0033314	10	2	0.15049	13.2899	0.00937563	0.340477	990;4998	geneontology_Biological_Process	ORC1;CDC6
GO:0072697	protein localization to cell cortex	http://amigo.geneontology.org/amigo/term/GO:0072697	10	2	0.15049	13.2899	0.00937563	0.340477	29899;54443	geneontology_Biological_Process	GPSM2;ANLN
GO:0006335	DNA replication-dependent nucleosome assembly	http://amigo.geneontology.org/amigo/term/GO:0006335	10	2	0.15049	13.2899	0.00937563	0.340477	4678;8208	geneontology_Biological_Process	NASP;CHAF1B
GO:0034723	DNA replication-dependent nucleosome organization	http://amigo.geneontology.org/amigo/term/GO:0034723	10	2	0.15049	13.2899	0.00937563	0.340477	4678;8208	geneontology_Biological_Process	NASP;CHAF1B
GO:0090481	pyrimidine nucleotide-sugar transmembrane transport	http://amigo.geneontology.org/amigo/term/GO:0090481	10	2	0.15049	13.2899	0.00937563	0.340477	7355;51006	geneontology_Biological_Process	SLC35C2;SLC35A2
GO:0010558	negative regulation of macromolecule biosynthetic process	http://amigo.geneontology.org/amigo/term/GO:0010558	1434	33	21.5803	1.52917	0.00955354	0.34537	166;332;990;1063;1153;1789;1810;1869;2305;2597;3660;4790;5347;9212;10005;10014;10614;10643;10644;11335;23522;23598;51497;53820;55192;55635;55922;57708;57761;79991;122953;144097;149951	geneontology_Biological_Process	DR1;NKRF;HEXIM1;NFKB1;AES;MIER1;RIPPLY3;STN1;AURKB;DNAJC17;HDAC5;IRF2;JDP2;KAT6B;PATZ1;NELFCD;E2F1;ACOT8;DEPDC1;FOXM1;DNMT3B;CBX3;IGF2BP3;SPINDOC;TRIB3;BIRC5;CIRBP;GAPDH;IGF2BP2;CENPF;COMMD7;PLK1;CDC6
GO:1903827	regulation of cellular protein localization	http://amigo.geneontology.org/amigo/term/GO:1903827	504	15	7.58471	1.97766	0.00962176	0.34537	1736;1869;2010;4000;5347;8766;9141;9777;10134;11261;29899;56681;58489;113130;118424	geneontology_Biological_Process	SAR1A;DKC1;UBE2J2;LMNA;RAB11A;ABHD17C;CHP1;E2F1;PDCD5;EMD;CDCA5;BCAP31;GPSM2;PLK1;TM9SF4
GO:0006890	retrograde vesicle-mediated transport, Golgi to ER	http://amigo.geneontology.org/amigo/term/GO:0006890	86	5	1.29422	3.86334	0.00962711	0.34537	3797;8775;11004;24137;56992	geneontology_Biological_Process	KIF3C;NAPA;KIF2C;KIF15;KIF4A
GO:0007098	centrosome cycle	http://amigo.geneontology.org/amigo/term/GO:0007098	120	6	1.80588	3.32247	0.00963269	0.34537	1111;4751;5347;6790;7516;25886	geneontology_Biological_Process	AURKA;CHEK1;NEK2;PLK1;POC1A;XRCC2
GO:0048193	Golgi vesicle transport	http://amigo.geneontology.org/amigo/term/GO:0048193	366	12	5.50795	2.17867	0.00973769	0.347471	3797;5624;8120;8775;10134;10652;11004;24137;51124;56681;56992;81693	geneontology_Biological_Process	SAR1A;AMN;PROC;IER3IP1;KIF3C;NAPA;KIF2C;YKT6;AP3B2;BCAP31;KIF15;KIF4A
GO:0090316	positive regulation of intracellular protein transport	http://amigo.geneontology.org/amigo/term/GO:0090316	157	7	2.3627	2.96271	0.00975282	0.347471	2010;9141;9777;10134;11261;56681;118424	geneontology_Biological_Process	SAR1A;UBE2J2;CHP1;PDCD5;EMD;BCAP31;TM9SF4
GO:0044092	negative regulation of molecular function	http://amigo.geneontology.org/amigo/term/GO:0044092	1061	26	15.967	1.62836	0.00992496	0.352298	166;332;847;1846;1848;1869;1992;2597;2773;3654;4171;4751;4790;5347;6737;6790;8904;9212;9232;10293;10614;10776;11261;56925;57761;149951	geneontology_Biological_Process	SERPINB1;HEXIM1;NFKB1;CAT;DUSP4;TRIM21;AES;LXN;ARPP19;AURKB;CHP1;DUSP6;GNAI3;AURKA;E2F1;PTTG1;CPNE1;TRAIP;TRIB3;BIRC5;GAPDH;MCM2;COMMD7;IRAK1;NEK2;PLK1
GO:0006977	DNA damage response, signal transduction by p53 class mediator resulting in cell cycle arrest	http://amigo.geneontology.org/amigo/term/GO:0006977	56	4	0.842746	4.74639	0.00998187	0.352298	891;995;1869;6790	geneontology_Biological_Process	CDC25C;AURKA;E2F1;CCNB1
GO:0046605	regulation of centrosome cycle	http://amigo.geneontology.org/amigo/term/GO:0046605	56	4	0.842746	4.74639	0.00998187	0.352298	1111;4751;6790;25886	geneontology_Biological_Process	AURKA;CHEK1;NEK2;POC1A
GO:0051302	regulation of cell division	http://amigo.geneontology.org/amigo/term/GO:0051302	158	7	2.37775	2.94396	0.0100779	0.35458	847;990;5347;6790;8766;9212;259266	geneontology_Biological_Process	CAT;RAB11A;ASPM;AURKB;AURKA;PLK1;CDC6
GO:0051101	regulation of DNA binding	http://amigo.geneontology.org/amigo/term/GO:0051101	122	6	1.83598	3.26801	0.0104002	0.364782	1869;4751;8904;55355;113130;375704	geneontology_Biological_Process	ENHO;HJURP;E2F1;CPNE1;CDCA5;NEK2
GO:0072431	signal transduction involved in mitotic G1 DNA damage checkpoint	http://amigo.geneontology.org/amigo/term/GO:0072431	57	4	0.857795	4.66312	0.0106111	0.369883	891;995;1869;6790	geneontology_Biological_Process	CDC25C;AURKA;E2F1;CCNB1
GO:1902400	intracellular signal transduction involved in G1 DNA damage checkpoint	http://amigo.geneontology.org/amigo/term/GO:1902400	57	4	0.857795	4.66312	0.0106111	0.369883	891;995;1869;6790	geneontology_Biological_Process	CDC25C;AURKA;E2F1;CCNB1
GO:0007050	cell cycle arrest	http://amigo.geneontology.org/amigo/term/GO:0007050	240	9	3.61177	2.49185	0.0107115	0.372233	891;995;1033;1869;2305;6790;9238;10634;55771	geneontology_Biological_Process	CDC25C;GAS2L1;AURKA;E2F1;CCNB1;FOXM1;CDKN3;PRR11;TBRG4
GO:1902751	positive regulation of cell cycle G2/M phase transition	http://amigo.geneontology.org/amigo/term/GO:1902751	31	3	0.46652	6.43059	0.011099	0.382516	891;995;8766	geneontology_Biological_Process	CDC25C;RAB11A;CCNB1
GO:0040020	regulation of meiotic nuclear division	http://amigo.geneontology.org/amigo/term/GO:0040020	31	3	0.46652	6.43059	0.011099	0.382516	991;7272;9319	geneontology_Biological_Process	CDC20;TRIP13;TTK
GO:0072413	signal transduction involved in mitotic cell cycle checkpoint	http://amigo.geneontology.org/amigo/term/GO:0072413	58	4	0.872844	4.58272	0.0112655	0.382516	891;995;1869;6790	geneontology_Biological_Process	CDC25C;AURKA;E2F1;CCNB1
GO:1902402	signal transduction involved in mitotic DNA damage checkpoint	http://amigo.geneontology.org/amigo/term/GO:1902402	58	4	0.872844	4.58272	0.0112655	0.382516	891;995;1869;6790	geneontology_Biological_Process	CDC25C;AURKA;E2F1;CCNB1
GO:1902403	signal transduction involved in mitotic DNA integrity checkpoint	http://amigo.geneontology.org/amigo/term/GO:1902403	58	4	0.872844	4.58272	0.0112655	0.382516	891;995;1869;6790	geneontology_Biological_Process	CDC25C;AURKA;E2F1;CCNB1
GO:0051657	maintenance of organelle location	http://amigo.geneontology.org/amigo/term/GO:0051657	11	2	0.165539	12.0817	0.0113461	0.382516	29899;259266	geneontology_Biological_Process	ASPM;GPSM2
GO:0045835	negative regulation of meiotic nuclear division	http://amigo.geneontology.org/amigo/term/GO:0045835	11	2	0.165539	12.0817	0.0113461	0.382516	7272;9319	geneontology_Biological_Process	TRIP13;TTK
GO:0006268	DNA unwinding involved in DNA replication	http://amigo.geneontology.org/amigo/term/GO:0006268	11	2	0.165539	12.0817	0.0113461	0.382516	4171;4176	geneontology_Biological_Process	MCM7;MCM2
GO:0000022	mitotic spindle elongation	http://amigo.geneontology.org/amigo/term/GO:0000022	11	2	0.165539	12.0817	0.0113461	0.382516	9212;24137	geneontology_Biological_Process	AURKB;KIF4A
GO:0015780	nucleotide-sugar transmembrane transport	http://amigo.geneontology.org/amigo/term/GO:0015780	11	2	0.165539	12.0817	0.0113461	0.382516	7355;51006	geneontology_Biological_Process	SLC35C2;SLC35A2
GO:0006997	nucleus organization	http://amigo.geneontology.org/amigo/term/GO:0006997	126	6	1.89618	3.16426	0.0120638	0.405501	891;2010;4000;5347;9133;221496	geneontology_Biological_Process	LMNA;LEMD2;CCNB1;EMD;PLK1;CCNB2
GO:0019207	kinase regulator activity	http://amigo.geneontology.org/amigo/term/GO:0019207	204	8	3.07	2.60586	0.0122787	0.411499	891;1163;1164;9133;9306;10614;11261;57761	geneontology_Molecular_Function	HEXIM1;SOCS6;CHP1;CCNB1;CKS1B;TRIB3;CKS2;CCNB2
hsa05222	Small cell lung cancer	http://www.kegg.jp/kegg-bin/show_pathway?hsa05222+1163+1164+1643+1869+4790	92	5	1.38451	3.61138	0.0126482	0.421468	1163;1164;1643;1869;4790	pathway_KEGG	NFKB1;DDB2;E2F1;CKS1B;CKS2
GO:1904356	regulation of telomere maintenance via telomere lengthening	http://amigo.geneontology.org/amigo/term/GO:1904356	60	4	0.902942	4.42996	0.0126508	0.421468	1736;4751;9212;79991	geneontology_Biological_Process	DKC1;STN1;AURKB;NEK2
GO:0043966	histone H3 acetylation	http://amigo.geneontology.org/amigo/term/GO:0043966	61	4	0.917991	4.35734	0.0133824	0.43752	1111;1810;10014;23522	geneontology_Biological_Process	DR1;HDAC5;KAT6B;CHEK1
GO:0043487	regulation of RNA stability	http://amigo.geneontology.org/amigo/term/GO:0043487	129	6	1.94133	3.09067	0.0134285	0.43752	1153;1736;1869;9238;10643;10644	geneontology_Biological_Process	DKC1;E2F1;IGF2BP3;CIRBP;IGF2BP2;TBRG4
GO:0016779	nucleotidyltransferase activity	http://amigo.geneontology.org/amigo/term/GO:0016779	129	6	1.94133	3.09067	0.0134285	0.43752	1736;4939;10623;10721;10849;51082	geneontology_Molecular_Function	DKC1;POLR3C;CD3EAP;POLR1D;OAS2;POLQ
GO:0055015	ventricular cardiac muscle cell development	http://amigo.geneontology.org/amigo/term/GO:0055015	12	2	0.180588	11.0749	0.0134812	0.43752	891;4000	geneontology_Biological_Process	LMNA;CCNB1
GO:0002566	somatic diversification of immune receptors via somatic mutation	http://amigo.geneontology.org/amigo/term/GO:0002566	12	2	0.180588	11.0749	0.0134812	0.43752	9156;10721	geneontology_Biological_Process	EXO1;POLQ
GO:0016446	somatic hypermutation of immunoglobulin genes	http://amigo.geneontology.org/amigo/term/GO:0016446	12	2	0.180588	11.0749	0.0134812	0.43752	9156;10721	geneontology_Biological_Process	EXO1;POLQ
GO:0051255	spindle midzone assembly	http://amigo.geneontology.org/amigo/term/GO:0051255	12	2	0.180588	11.0749	0.0134812	0.43752	9212;24137	geneontology_Biological_Process	AURKB;KIF4A
GO:0051231	spindle elongation	http://amigo.geneontology.org/amigo/term/GO:0051231	12	2	0.180588	11.0749	0.0134812	0.43752	9212;24137	geneontology_Biological_Process	AURKB;KIF4A
GO:0016846	carbon-sulfur lyase activity	http://amigo.geneontology.org/amigo/term/GO:0016846	12	2	0.180588	11.0749	0.0134812	0.43752	4258;56267	geneontology_Molecular_Function	KYAT3;MGST2
GO:1905269	positive regulation of chromatin organization	http://amigo.geneontology.org/amigo/term/GO:1905269	94	5	1.41461	3.53454	0.0137829	0.446029	891;1789;4000;57708;122953	geneontology_Biological_Process	LMNA;MIER1;JDP2;CCNB1;DNMT3B
GO:0045934	negative regulation of nucleobase-containing compound metabolic process	http://amigo.geneontology.org/amigo/term/GO:0045934	1418	32	21.3395	1.49956	0.0138708	0.447592	166;332;990;1063;1153;1736;1789;1810;1869;2305;3660;4790;5347;9212;10014;10614;10721;11335;23522;23598;51497;53820;55192;55635;55922;57708;57761;79000;79991;122953;144097;149951	geneontology_Biological_Process	DR1;NKRF;HEXIM1;NFKB1;DKC1;AES;MIER1;RIPPLY3;STN1;AURKB;DNAJC17;HDAC5;IRF2;JDP2;KAT6B;PATZ1;NELFCD;E2F1;DEPDC1;FOXM1;DNMT3B;CBX3;SPINDOC;TRIB3;AUNIP;BIRC5;CIRBP;CENPF;COMMD7;PLK1;POLQ;CDC6
GO:0032212	positive regulation of telomere maintenance via telomerase	http://amigo.geneontology.org/amigo/term/GO:0032212	34	3	0.511667	5.86319	0.0142967	0.46002	1736;4751;9212	geneontology_Biological_Process	DKC1;AURKB;NEK2
GO:0001824	blastocyst development	http://amigo.geneontology.org/amigo/term/GO:0001824	95	5	1.42966	3.49734	0.0143752	0.461231	86;4678;4751;9837;26469	geneontology_Biological_Process	PTPN18;NASP;GINS1;ACTL6A;NEK2
GO:0031571	mitotic G1 DNA damage checkpoint	http://amigo.geneontology.org/amigo/term/GO:0031571	63	4	0.948089	4.21901	0.0149251	0.47617	891;995;1869;6790	geneontology_Biological_Process	CDC25C;AURKA;E2F1;CCNB1
GO:0044819	mitotic G1/S transition checkpoint	http://amigo.geneontology.org/amigo/term/GO:0044819	63	4	0.948089	4.21901	0.0149251	0.47617	891;995;1869;6790	geneontology_Biological_Process	CDC25C;AURKA;E2F1;CCNB1
GO:0016772	transferase activity, transferring phosphorus-containing groups	http://amigo.geneontology.org/amigo/term/GO:0016772	993	24	14.9437	1.60603	0.0151747	0.481448	699;891;1111;1716;1736;3563;3654;4751;4939;5347;6790;7083;7272;9133;9212;9238;10623;10721;10849;22929;51082;54981;57761;375449	geneontology_Molecular_Function	BUB1;DKC1;MAST4;POLR3C;CD3EAP;POLR1D;SEPHS1;AURKB;IL3RA;NMRK1;OAS2;AURKA;CCNB1;DGUOK;TRIB3;TK1;TTK;CHEK1;IRAK1;NEK2;PLK1;POLQ;TBRG4;CCNB2
GO:0032388	positive regulation of intracellular transport	http://amigo.geneontology.org/amigo/term/GO:0032388	212	8	3.1904	2.50753	0.0151758	0.481448	2010;9141;9777;10134;10615;11261;56681;118424	geneontology_Biological_Process	SAR1A;UBE2J2;CHP1;PDCD5;EMD;SPAG5;BCAP31;TM9SF4
GO:0000209	protein polyubiquitination	http://amigo.geneontology.org/amigo/term/GO:0000209	255	9	3.8375	2.34527	0.0153977	0.481541	1643;6737;11065;26234;27338;29089;51191;54708;118424	geneontology_Biological_Process	MARCH5;TRIM21;UBE2J2;DDB2;FBXL5;HERC5;UBE2C;UBE2S;UBE2T
hsa05166	Human T-cell leukemia virus 1 infection	http://www.kegg.jp/kegg-bin/show_pathway?hsa05166+1111+1869+4605+4790+7417+8324+9133+9232+991	255	9	3.8375	2.34527	0.0153977	0.481541	1111;1869;4605;4790;7417;8324;9133;9232;991	pathway_KEGG	NFKB1;VDAC2;FZD7;MYBL2;CDC20;E2F1;PTTG1;CHEK1;CCNB2
GO:0043094	cellular metabolic compound salvage	http://amigo.geneontology.org/amigo/term/GO:0043094	35	3	0.526716	5.69567	0.0154665	0.481541	1716;2766;7083	geneontology_Biological_Process	GMPR;DGUOK;TK1
GO:0044773	mitotic DNA damage checkpoint	http://amigo.geneontology.org/amigo/term/GO:0044773	97	5	1.45976	3.42523	0.0156105	0.481541	891;995;1869;6790;146956	geneontology_Biological_Process	CDC25C;AURKA;E2F1;CCNB1;EME1
GO:0044783	G1 DNA damage checkpoint	http://amigo.geneontology.org/amigo/term/GO:0044783	64	4	0.963138	4.15309	0.0157368	0.481541	891;995;1869;6790	geneontology_Biological_Process	CDC25C;AURKA;E2F1;CCNB1
GO:0051785	positive regulation of nuclear division	http://amigo.geneontology.org/amigo/term/GO:0051785	64	4	0.963138	4.15309	0.0157368	0.481541	6790;9700;11065;113130	geneontology_Biological_Process	UBE2C;AURKA;ESPL1;CDCA5
GO:0001701	in utero embryonic development	http://amigo.geneontology.org/amigo/term/GO:0001701	345	11	5.19192	2.11868	0.0157516	0.481541	86;891;4678;4751;7516;8894;9133;9394;9837;26469;202018	geneontology_Biological_Process	TAPT1;HS6ST1;PTPN18;CCNB1;EIF2S2;NASP;GINS1;ACTL6A;NEK2;XRCC2;CCNB2
GO:0036109	alpha-linolenic acid metabolic process	http://amigo.geneontology.org/amigo/term/GO:0036109	13	2	0.195637	10.223	0.0157757	0.481541	30;10005	geneontology_Biological_Process	ACAA1;ACOT8
GO:0072425	signal transduction involved in G2 DNA damage checkpoint	http://amigo.geneontology.org/amigo/term/GO:0072425	13	2	0.195637	10.223	0.0157757	0.481541	1111;5347	geneontology_Biological_Process	CHEK1;PLK1
GO:2000615	regulation of histone H3-K9 acetylation	http://amigo.geneontology.org/amigo/term/GO:2000615	13	2	0.195637	10.223	0.0157757	0.481541	1111;10014	geneontology_Biological_Process	HDAC5;CHEK1
GO:0051315	attachment of mitotic spindle microtubules to kinetochore	http://amigo.geneontology.org/amigo/term/GO:0051315	13	2	0.195637	10.223	0.0157757	0.481541	11004;83540	geneontology_Biological_Process	KIF2C;NUF2
GO:0043248	proteasome assembly	http://amigo.geneontology.org/amigo/term/GO:0043248	13	2	0.195637	10.223	0.0157757	0.481541	5710;11047	geneontology_Biological_Process	ADRM1;PSMD4
GO:1990380	Lys48-specific deubiquitinase activity	http://amigo.geneontology.org/amigo/term/GO:1990380	13	2	0.195637	10.223	0.0157757	0.481541	80013;389856	geneontology_Molecular_Function	USP27X;MINDY3
GO:0017017	MAP kinase tyrosine/serine/threonine phosphatase activity	http://amigo.geneontology.org/amigo/term/GO:0017017	13	2	0.195637	10.223	0.0157757	0.481541	1846;1848	geneontology_Molecular_Function	DUSP4;DUSP6
GO:0031023	microtubule organizing center organization	http://amigo.geneontology.org/amigo/term/GO:0031023	134	6	2.01657	2.97535	0.0159371	0.485157	1111;4751;5347;6790;7516;25886	geneontology_Biological_Process	AURKA;CHEK1;NEK2;PLK1;POC1A;XRCC2
GO:0016567	protein ubiquitination	http://amigo.geneontology.org/amigo/term/GO:0016567	737	19	11.0911	1.71308	0.0161334	0.489812	991;1643;5347;6737;9306;10293;11065;11261;26234;26994;27338;29089;51191;54708;57761;83461;112950;118424;142686	geneontology_Biological_Process	MARCH5;RNF11;TRIM21;UBE2J2;ASB14;SOCS6;CHP1;DDB2;FBXL5;HERC5;MED8;UBE2C;CDC20;CDCA3;UBE2S;TRAIP;TRIB3;PLK1;UBE2T
GO:0032446	protein modification by small protein conjugation	http://amigo.geneontology.org/amigo/term/GO:0032446	789	20	11.8737	1.6844	0.0162361	0.49161	991;1643;5347;6737;9306;10054;10293;11065;11261;26234;26994;27338;29089;51191;54708;57761;83461;112950;118424;142686	geneontology_Biological_Process	MARCH5;RNF11;TRIM21;UBA2;UBE2J2;ASB14;SOCS6;CHP1;DDB2;FBXL5;HERC5;MED8;UBE2C;CDC20;CDCA3;UBE2S;TRAIP;TRIB3;PLK1;UBE2T
GO:0031327	negative regulation of cellular biosynthetic process	http://amigo.geneontology.org/amigo/term/GO:0031327	1492	33	22.4532	1.46973	0.0164138	0.495662	166;332;990;1063;1153;1789;1810;1869;2305;2597;3660;4790;5347;9212;10005;10014;10614;10643;10644;11335;23522;23598;51497;53820;55192;55635;55922;57708;57761;79991;122953;144097;149951	geneontology_Biological_Process	DR1;NKRF;HEXIM1;NFKB1;AES;MIER1;RIPPLY3;STN1;AURKB;DNAJC17;HDAC5;IRF2;JDP2;KAT6B;PATZ1;NELFCD;E2F1;ACOT8;DEPDC1;FOXM1;DNMT3B;CBX3;IGF2BP3;SPINDOC;TRIB3;BIRC5;CIRBP;GAPDH;IGF2BP2;CENPF;COMMD7;PLK1;CDC6
GO:0032481	positive regulation of type I interferon production	http://amigo.geneontology.org/amigo/term/GO:0032481	65	4	0.978187	4.0892	0.0165757	0.497313	3654;4790;7098;10623	geneontology_Biological_Process	NFKB1;POLR3C;TLR3;IRAK1
GO:0000387	spliceosomal snRNP assembly	http://amigo.geneontology.org/amigo/term/GO:0000387	36	3	0.541765	5.53745	0.0166886	0.497313	6628;6637;10073	geneontology_Biological_Process	SNUPN;SNRPB;SNRPG
GO:0051973	positive regulation of telomerase activity	http://amigo.geneontology.org/amigo/term/GO:0051973	36	3	0.541765	5.53745	0.0166886	0.497313	1736;4751;9212	geneontology_Biological_Process	DKC1;AURKB;NEK2
GO:0048487	beta-tubulin binding	http://amigo.geneontology.org/amigo/term/GO:0048487	36	3	0.541765	5.53745	0.0166886	0.497313	2010;9141;11337	geneontology_Molecular_Function	GABARAP;PDCD5;EMD
hsa03030	DNA replication	http://www.kegg.jp/kegg-bin/show_pathway?hsa03030+4171+4176+5984	36	3	0.541765	5.53745	0.0166886	0.497313	4171;4176;5984	pathway_KEGG	MCM7;MCM2;RFC4
GO:0007568	aging	http://amigo.geneontology.org/amigo/term/GO:0007568	303	10	4.55986	2.19305	0.0168014	0.499356	847;1111;2305;3654;4000;6185;8438;9212;54708;140823	geneontology_Biological_Process	MARCH5;CAT;LMNA;AURKB;FOXM1;RAD54L;ROMO1;RPN2;CHEK1;IRAK1
GO:0019887	protein kinase regulator activity	http://amigo.geneontology.org/amigo/term/GO:0019887	175	7	2.63358	2.65798	0.0168874	0.500594	891;1163;1164;9133;10614;11261;57761	geneontology_Molecular_Function	HEXIM1;CHP1;CCNB1;CKS1B;TRIB3;CKS2;CCNB2
GO:0065003	protein-containing complex assembly	http://amigo.geneontology.org/amigo/term/GO:0065003	1835	39	27.615	1.41228	0.0170011	0.502054	847;891;1058;1063;1153;1643;1810;3654;4171;4678;5701;5710;6122;6628;6637;6737;7083;7417;8208;8662;8775;9380;9777;10073;10721;11047;11065;11261;22919;23522;27338;50853;51103;54443;55299;55355;55839;56681;84079	geneontology_Biological_Process	SNUPN;DR1;SAR1A;VDAC2;CAT;CENPA;GRHPR;RPL3;TRIM21;HJURP;NAPA;VILL;ANKRD27;CHP1;DDB2;EIF3B;KAT6B;NDUFAF1;UBE2C;ADRM1;CCNB1;UBE2S;MAPRE1;NASP;PSMD4;SNRPB;SNRPG;CHAF1B;CIRBP;MCM2;PSMC2;TK1;CENPF;CENPN;IRAK1;POLQ;TM9SF4;ANLN;BRIX1
hsa04120	Ubiquitin mediated proteolysis	http://www.kegg.jp/kegg-bin/show_pathway?hsa04120+10054+11065+118424+1643+27338+991	136	6	2.04667	2.93159	0.0170256	0.502054	10054;11065;118424;1643;27338;991	pathway_KEGG	UBA2;UBE2J2;DDB2;UBE2C;CDC20;UBE2S
GO:0035335	peptidyl-tyrosine dephosphorylation	http://amigo.geneontology.org/amigo/term/GO:0035335	100	5	1.5049	3.32247	0.0175931	0.516095	995;1033;1846;1848;26469	geneontology_Biological_Process	DUSP4;CDC25C;PTPN18;DUSP6;CDKN3
GO:0004725	protein tyrosine phosphatase activity	http://amigo.geneontology.org/amigo/term/GO:0004725	100	5	1.5049	3.32247	0.0175931	0.516095	995;1033;1846;1848;26469	geneontology_Molecular_Function	DUSP4;CDC25C;PTPN18;DUSP6;CDKN3
GO:1902275	regulation of chromatin organization	http://amigo.geneontology.org/amigo/term/GO:1902275	177	7	2.66368	2.62794	0.0178603	0.522394	891;1111;1789;4000;10014;57708;122953	geneontology_Biological_Process	LMNA;MIER1;HDAC5;JDP2;CCNB1;DNMT3B;CHEK1
GO:1904358	positive regulation of telomere maintenance via telomere lengthening	http://amigo.geneontology.org/amigo/term/GO:1904358	37	3	0.556814	5.38779	0.0179634	0.522394	1736;4751;9212	geneontology_Biological_Process	DKC1;AURKB;NEK2
GO:0051293	establishment of spindle localization	http://amigo.geneontology.org/amigo/term/GO:0051293	37	3	0.556814	5.38779	0.0179634	0.522394	1058;9700;29899	geneontology_Biological_Process	CENPA;ESPL1;GPSM2
GO:1903364	positive regulation of cellular protein catabolic process	http://amigo.geneontology.org/amigo/term/GO:1903364	138	6	2.07677	2.88911	0.0181642	0.522394	5347;5701;6790;10134;26234;57761	geneontology_Biological_Process	FBXL5;AURKA;TRIB3;PSMC2;BCAP31;PLK1
GO:0036295	cellular response to increased oxygen levels	http://amigo.geneontology.org/amigo/term/GO:0036295	14	2	0.210687	9.49278	0.0182241	0.522394	537;1789	geneontology_Biological_Process	ATP6AP1;DNMT3B
GO:0090151	establishment of protein localization to mitochondrial membrane	http://amigo.geneontology.org/amigo/term/GO:0090151	14	2	0.210687	9.49278	0.0182241	0.522394	9141;140823	geneontology_Biological_Process	PDCD5;ROMO1
GO:0045898	regulation of RNA polymerase II transcriptional preinitiation complex assembly	http://amigo.geneontology.org/amigo/term/GO:0045898	14	2	0.210687	9.49278	0.0182241	0.522394	1810;5701	geneontology_Biological_Process	DR1;PSMC2
GO:0019321	pentose metabolic process	http://amigo.geneontology.org/amigo/term/GO:0019321	14	2	0.210687	9.49278	0.0182241	0.522394	22934;27294	geneontology_Biological_Process	RPIA;DHDH
GO:0033549	MAP kinase phosphatase activity	http://amigo.geneontology.org/amigo/term/GO:0033549	14	2	0.210687	9.49278	0.0182241	0.522394	1846;1848	geneontology_Molecular_Function	DUSP4;DUSP6
GO:1901800	positive regulation of proteasomal protein catabolic process	http://amigo.geneontology.org/amigo/term/GO:1901800	102	5	1.535	3.25733	0.0190034	0.543353	5347;5701;6790;10134;57761	geneontology_Biological_Process	AURKA;TRIB3;PSMC2;BCAP31;PLK1
GO:0007569	cell aging	http://amigo.geneontology.org/amigo/term/GO:0007569	103	5	1.55005	3.2257	0.0197356	0.562865	1111;2305;4000;54708;140823	geneontology_Biological_Process	MARCH5;LMNA;FOXM1;ROMO1;CHEK1
GO:2000241	regulation of reproductive process	http://amigo.geneontology.org/amigo/term/GO:2000241	141	6	2.12191	2.82764	0.0199684	0.568067	991;995;6790;7272;9319;259266	geneontology_Biological_Process	CDC25C;ASPM;CDC20;AURKA;TRIP13;TTK
GO:0051052	regulation of DNA metabolic process	http://amigo.geneontology.org/amigo/term/GO:0051052	405	12	6.09486	1.96887	0.0200936	0.570195	990;1111;1736;2305;4751;5984;9212;10635;10721;79000;79075;79991	geneontology_Biological_Process	DKC1;STN1;AURKB;FOXM1;DSCC1;RAD51AP1;AUNIP;RFC4;CHEK1;NEK2;POLQ;CDC6
GO:0009890	negative regulation of biosynthetic process	http://amigo.geneontology.org/amigo/term/GO:0009890	1516	33	22.8143	1.44646	0.0202254	0.572494	166;332;990;1063;1153;1789;1810;1869;2305;2597;3660;4790;5347;9212;10005;10014;10614;10643;10644;11335;23522;23598;51497;53820;55192;55635;55922;57708;57761;79991;122953;144097;149951	geneontology_Biological_Process	DR1;NKRF;HEXIM1;NFKB1;AES;MIER1;RIPPLY3;STN1;AURKB;DNAJC17;HDAC5;IRF2;JDP2;KAT6B;PATZ1;NELFCD;E2F1;ACOT8;DEPDC1;FOXM1;DNMT3B;CBX3;IGF2BP3;SPINDOC;TRIB3;BIRC5;CIRBP;GAPDH;IGF2BP2;CENPF;COMMD7;PLK1;CDC6
GO:0031056	regulation of histone modification	http://amigo.geneontology.org/amigo/term/GO:0031056	142	6	2.13696	2.80772	0.0205959	0.577399	891;1111;1789;4000;10014;122953	geneontology_Biological_Process	LMNA;HDAC5;JDP2;CCNB1;DNMT3B;CHEK1
GO:0032506	cytokinetic process	http://amigo.geneontology.org/amigo/term/GO:0032506	39	3	0.586912	5.1115	0.0206713	0.577399	311;9212;54443	geneontology_Biological_Process	ANXA11;AURKB;ANLN
GO:0070317	negative regulation of G0 to G1 transition	http://amigo.geneontology.org/amigo/term/GO:0070317	39	3	0.586912	5.1115	0.0206713	0.577399	1111;1869;11335	geneontology_Biological_Process	E2F1;CBX3;CHEK1
GO:0010569	regulation of double-strand break repair via homologous recombination	http://amigo.geneontology.org/amigo/term/GO:0010569	39	3	0.586912	5.1115	0.0206713	0.577399	1111;10635;10721	geneontology_Biological_Process	RAD51AP1;CHEK1;POLQ
GO:0033540	fatty acid beta-oxidation using acyl-CoA oxidase	http://amigo.geneontology.org/amigo/term/GO:0033540	15	2	0.225736	8.85993	0.0208215	0.577399	30;10005	geneontology_Biological_Process	ACAA1;ACOT8
GO:0043101	purine-containing compound salvage	http://amigo.geneontology.org/amigo/term/GO:0043101	15	2	0.225736	8.85993	0.0208215	0.577399	1716;2766	geneontology_Biological_Process	GMPR;DGUOK
GO:0043970	histone H3-K9 acetylation	http://amigo.geneontology.org/amigo/term/GO:0043970	15	2	0.225736	8.85993	0.0208215	0.577399	1111;10014	geneontology_Biological_Process	HDAC5;CHEK1
GO:0031468	nuclear envelope reassembly	http://amigo.geneontology.org/amigo/term/GO:0031468	15	2	0.225736	8.85993	0.0208215	0.577399	2010;4000	geneontology_Biological_Process	LMNA;EMD
GO:0043687	post-translational protein modification	http://amigo.geneontology.org/amigo/term/GO:0043687	360	11	5.41765	2.0304	0.0208588	0.577399	1643;5624;5688;5690;5701;5710;8766;9306;26234;79075;142686	geneontology_Biological_Process	PROC;ASB14;RAB11A;SOCS6;DDB2;FBXL5;DSCC1;PSMD4;PSMA7;PSMC2;PSMB2
GO:0007004	telomere maintenance via telomerase	http://amigo.geneontology.org/amigo/term/GO:0007004	70	4	1.05343	3.79711	0.0211877	0.584075	1736;4751;9212;79991	geneontology_Biological_Process	DKC1;STN1;AURKB;NEK2
GO:0000723	telomere maintenance	http://amigo.geneontology.org/amigo/term/GO:0000723	143	6	2.15201	2.78809	0.0212366	0.584075	1736;4751;5984;9156;9212;79991	geneontology_Biological_Process	DKC1;STN1;AURKB;EXO1;RFC4;NEK2
GO:0030330	DNA damage response, signal transduction by p53 class mediator	http://amigo.geneontology.org/amigo/term/GO:0030330	105	5	1.58015	3.16426	0.0212551	0.584075	891;995;1869;2305;6790	geneontology_Biological_Process	CDC25C;AURKA;E2F1;CCNB1;FOXM1
hsa05161	Hepatitis B	http://www.kegg.jp/kegg-bin/show_pathway?hsa05161+1643+1869+332+4790+537+7098	144	6	2.16706	2.76873	0.0218908	0.600083	1643;1869;332;4790;537;7098	pathway_KEGG	NFKB1;TLR3;ATP6AP1;DDB2;E2F1;BIRC5
GO:0071156	regulation of cell cycle arrest	http://amigo.geneontology.org/amigo/term/GO:0071156	106	5	1.5952	3.13441	0.0220426	0.602782	891;995;1869;2305;6790	geneontology_Biological_Process	CDC25C;AURKA;E2F1;CCNB1;FOXM1
GO:0003899	DNA-directed 5'-3' RNA polymerase activity	http://amigo.geneontology.org/amigo/term/GO:0003899	40	3	0.601961	4.98371	0.0221046	0.603017	10623;10849;51082	geneontology_Molecular_Function	POLR3C;CD3EAP;POLR1D
GO:0006278	RNA-dependent DNA biosynthetic process	http://amigo.geneontology.org/amigo/term/GO:0006278	72	4	1.08353	3.69164	0.0232314	0.629419	1736;4751;9212;79991	geneontology_Biological_Process	DKC1;STN1;AURKB;NEK2
hsa04115	p53 signaling pathway	http://www.kegg.jp/kegg-bin/show_pathway?hsa04115+1111+1643+891+9133	72	4	1.08353	3.69164	0.0232314	0.629419	1111;1643;891;9133	pathway_KEGG	DDB2;CCNB1;CHEK1;CCNB2
GO:0032200	telomere organization	http://amigo.geneontology.org/amigo/term/GO:0032200	146	6	2.19716	2.7308	0.0232396	0.629419	1736;4751;5984;9156;9212;79991	geneontology_Biological_Process	DKC1;STN1;AURKB;EXO1;RFC4;NEK2
GO:2000269	regulation of fibroblast apoptotic process	http://amigo.geneontology.org/amigo/term/GO:2000269	16	2	0.240785	8.30618	0.0235628	0.629869	7516;51124	geneontology_Biological_Process	IER3IP1;XRCC2
GO:0000076	DNA replication checkpoint	http://amigo.geneontology.org/amigo/term/GO:0000076	16	2	0.240785	8.30618	0.0235628	0.629869	990;4998	geneontology_Biological_Process	ORC1;CDC6
GO:0035372	protein localization to microtubule	http://amigo.geneontology.org/amigo/term/GO:0035372	16	2	0.240785	8.30618	0.0235628	0.629869	22919;58489	geneontology_Biological_Process	ABHD17C;MAPRE1
GO:0051447	negative regulation of meiotic cell cycle	http://amigo.geneontology.org/amigo/term/GO:0051447	16	2	0.240785	8.30618	0.0235628	0.629869	7272;9319	geneontology_Biological_Process	TRIP13;TTK
GO:0007076	mitotic chromosome condensation	http://amigo.geneontology.org/amigo/term/GO:0007076	16	2	0.240785	8.30618	0.0235628	0.629869	23397;113130	geneontology_Biological_Process	NCAPH;CDCA5
GO:0043489	RNA stabilization	http://amigo.geneontology.org/amigo/term/GO:0043489	41	3	0.61701	4.86215	0.0235908	0.629869	1153;1736;1869	geneontology_Biological_Process	DKC1;E2F1;CIRBP
GO:0031398	positive regulation of protein ubiquitination	http://amigo.geneontology.org/amigo/term/GO:0031398	109	5	1.64034	3.04814	0.024518	0.653082	991;5347;11065;27338;57761	geneontology_Biological_Process	UBE2C;CDC20;UBE2S;TRIB3;PLK1
GO:0016233	telomere capping	http://amigo.geneontology.org/amigo/term/GO:0016233	42	3	0.63206	4.74639	0.0251299	0.667806	4751;9212;79991	geneontology_Biological_Process	STN1;AURKB;NEK2
GO:0042826	histone deacetylase binding	http://amigo.geneontology.org/amigo/term/GO:0042826	110	5	1.65539	3.02043	0.0253813	0.672902	991;1789;7153;10014;57708	geneontology_Molecular_Function	MIER1;HDAC5;CDC20;TOP2A;DNMT3B
GO:0051782	negative regulation of cell division	http://amigo.geneontology.org/amigo/term/GO:0051782	17	2	0.255834	7.81758	0.0264432	0.684989	9212;259266	geneontology_Biological_Process	ASPM;AURKB
GO:0055012	ventricular cardiac muscle cell differentiation	http://amigo.geneontology.org/amigo/term/GO:0055012	17	2	0.255834	7.81758	0.0264432	0.684989	891;4000	geneontology_Biological_Process	LMNA;CCNB1
GO:0034501	protein localization to kinetochore	http://amigo.geneontology.org/amigo/term/GO:0034501	17	2	0.255834	7.81758	0.0264432	0.684989	7272;9212	geneontology_Biological_Process	AURKB;TTK
GO:0006271	DNA strand elongation involved in DNA replication	http://amigo.geneontology.org/amigo/term/GO:0006271	17	2	0.255834	7.81758	0.0264432	0.684989	5984;9837	geneontology_Biological_Process	GINS1;RFC4
GO:1904355	positive regulation of telomere capping	http://amigo.geneontology.org/amigo/term/GO:1904355	17	2	0.255834	7.81758	0.0264432	0.684989	4751;9212	geneontology_Biological_Process	AURKB;NEK2
GO:0051010	microtubule plus-end binding	http://amigo.geneontology.org/amigo/term/GO:0051010	17	2	0.255834	7.81758	0.0264432	0.684989	11004;22919	geneontology_Molecular_Function	KIF2C;MAPRE1
GO:0055106	ubiquitin-protein transferase regulator activity	http://amigo.geneontology.org/amigo/term/GO:0055106	17	2	0.255834	7.81758	0.0264432	0.684989	991;57761	geneontology_Molecular_Function	CDC20;TRIB3
GO:0031489	myosin V binding	http://amigo.geneontology.org/amigo/term/GO:0031489	17	2	0.255834	7.81758	0.0264432	0.684989	5873;8766	geneontology_Molecular_Function	RAB27A;RAB11A
hsa00450	Selenocompound metabolism	http://www.kegg.jp/kegg-bin/show_pathway?hsa00450+22929+56267	17	2	0.255834	7.81758	0.0264432	0.684989	22929;56267	pathway_KEGG	KYAT3;SEPHS1
GO:0042393	histone binding	http://amigo.geneontology.org/amigo/term/GO:0042393	192	7	2.88941	2.42264	0.0264437	0.684989	1163;1164;4171;4678;8208;23522;55355	geneontology_Molecular_Function	HJURP;KAT6B;NASP;CKS1B;CHAF1B;MCM2;CKS2
GO:0070316	regulation of G0 to G1 transition	http://amigo.geneontology.org/amigo/term/GO:0070316	43	3	0.647109	4.63601	0.0267219	0.685904	1111;1869;11335	geneontology_Biological_Process	E2F1;CBX3;CHEK1
GO:0004712	protein serine/threonine/tyrosine kinase activity	http://amigo.geneontology.org/amigo/term/GO:0004712	43	3	0.647109	4.63601	0.0267219	0.685904	6790;7272;9212	geneontology_Molecular_Function	AURKB;AURKA;TTK
GO:0034062	5'-3' RNA polymerase activity	http://amigo.geneontology.org/amigo/term/GO:0034062	43	3	0.647109	4.63601	0.0267219	0.685904	10623;10849;51082	geneontology_Molecular_Function	POLR3C;CD3EAP;POLR1D
GO:0097747	RNA polymerase activity	http://amigo.geneontology.org/amigo/term/GO:0097747	43	3	0.647109	4.63601	0.0267219	0.685904	10623;10849;51082	geneontology_Molecular_Function	POLR3C;CD3EAP;POLR1D
GO:0006396	RNA processing	http://amigo.geneontology.org/amigo/term/GO:0006396	887	21	13.3485	1.57321	0.0272622	0.698185	891;1153;1736;3185;4234;6628;6637;6638;8270;9238;10073;10286;22913;22929;55094;55272;55323;55661;56259;90121;115708	geneontology_Biological_Process	HNRNPF;SNUPN;GPATCH1;TRMT61A;IMP3;SNRPN;DKC1;SEPHS1;BCAS2;LARP6;DDX27;RALY;CCNB1;CTNNBL1;LAGE3;SNRPB;SNRPG;TSR2;CIRBP;METTL1;TBRG4
GO:1902806	regulation of cell cycle G1/S phase transition	http://amigo.geneontology.org/amigo/term/GO:1902806	152	6	2.28745	2.623	0.0276179	0.704762	891;990;995;1869;6790;81610	geneontology_Biological_Process	CDC25C;AURKA;E2F1;CCNB1;FAM83D;CDC6
GO:0000377	RNA splicing, via transesterification reactions with bulged adenosine as nucleophile	http://amigo.geneontology.org/amigo/term/GO:0000377	329	10	4.95113	2.01974	0.0277443	0.704762	1153;3185;6628;6637;6638;10073;10286;22913;55094;56259	geneontology_Biological_Process	HNRNPF;SNUPN;GPATCH1;SNRPN;BCAS2;RALY;CTNNBL1;SNRPB;SNRPG;CIRBP
GO:0000398	mRNA splicing, via spliceosome	http://amigo.geneontology.org/amigo/term/GO:0000398	329	10	4.95113	2.01974	0.0277443	0.704762	1153;3185;6628;6637;6638;10073;10286;22913;55094;56259	geneontology_Biological_Process	HNRNPF;SNUPN;GPATCH1;SNRPN;BCAS2;RALY;CTNNBL1;SNRPB;SNRPG;CIRBP
GO:0006473	protein acetylation	http://amigo.geneontology.org/amigo/term/GO:0006473	194	7	2.91951	2.39766	0.0277687	0.704762	86;1111;1810;10014;23522;55257;79075	geneontology_Biological_Process	DR1;HDAC5;KAT6B;MRGBP;DSCC1;ACTL6A;CHEK1
GO:0043549	regulation of kinase activity	http://amigo.geneontology.org/amigo/term/GO:0043549	836	20	12.581	1.5897	0.0279971	0.707526	891;990;995;1033;1163;1164;1846;1848;3654;5347;7098;7410;8682;9133;9306;10614;11261;22974;51191;57761	geneontology_Biological_Process	PEA15;HEXIM1;DUSP4;CDC25C;SOCS6;TLR3;VAV2;CHP1;DUSP6;HERC5;TPX2;CCNB1;CDKN3;CKS1B;TRIB3;CKS2;IRAK1;PLK1;CCNB2;CDC6
GO:0043543	protein acylation	http://amigo.geneontology.org/amigo/term/GO:0043543	238	8	3.58167	2.23359	0.0280028	0.707526	86;1111;1810;10014;23522;55257;58489;79075	geneontology_Biological_Process	DR1;ABHD17C;HDAC5;KAT6B;MRGBP;DSCC1;ACTL6A;CHEK1
GO:0006282	regulation of DNA repair	http://amigo.geneontology.org/amigo/term/GO:0006282	113	5	1.70054	2.94024	0.0280871	0.708071	1111;2305;10635;10721;79000	geneontology_Biological_Process	FOXM1;RAD51AP1;AUNIP;CHEK1;POLQ
GO:0008138	protein tyrosine/serine/threonine phosphatase activity	http://amigo.geneontology.org/amigo/term/GO:0008138	44	3	0.662158	4.53064	0.0283667	0.712704	1033;1846;1848	geneontology_Molecular_Function	DUSP4;DUSP6;CDKN3
GO:0016573	histone acetylation	http://amigo.geneontology.org/amigo/term/GO:0016573	153	6	2.3025	2.60586	0.0283971	0.712704	86;1111;1810;10014;23522;55257	geneontology_Biological_Process	DR1;HDAC5;KAT6B;MRGBP;ACTL6A;CHEK1
GO:0045892	negative regulation of transcription, DNA-templated	http://amigo.geneontology.org/amigo/term/GO:0045892	1167	26	17.5622	1.48045	0.029247	0.729598	166;332;1063;1789;1810;1869;2305;3660;4790;5347;9212;10014;10614;11335;23522;23598;51497;53820;55192;55635;55922;57708;57761;122953;144097;149951	geneontology_Biological_Process	DR1;NKRF;HEXIM1;NFKB1;AES;MIER1;RIPPLY3;AURKB;DNAJC17;HDAC5;IRF2;JDP2;KAT6B;PATZ1;NELFCD;E2F1;DEPDC1;FOXM1;DNMT3B;CBX3;SPINDOC;TRIB3;BIRC5;CENPF;COMMD7;PLK1
GO:0000375	RNA splicing, via transesterification reactions	http://amigo.geneontology.org/amigo/term/GO:0000375	332	10	4.99628	2.00149	0.0292728	0.729598	1153;3185;6628;6637;6638;10073;10286;22913;55094;56259	geneontology_Biological_Process	HNRNPF;SNUPN;GPATCH1;SNRPN;BCAS2;RALY;CTNNBL1;SNRPB;SNRPG;CIRBP
GO:0033189	response to vitamin A	http://amigo.geneontology.org/amigo/term/GO:0033189	18	2	0.270883	7.38327	0.0294578	0.729598	847;1789	geneontology_Biological_Process	CAT;DNMT3B
GO:0000712	resolution of meiotic recombination intermediates	http://amigo.geneontology.org/amigo/term/GO:0000712	18	2	0.270883	7.38327	0.0294578	0.729598	7153;146956	geneontology_Biological_Process	TOP2A;EME1
GO:0009130	pyrimidine nucleoside monophosphate biosynthetic process	http://amigo.geneontology.org/amigo/term/GO:0009130	18	2	0.270883	7.38327	0.0294578	0.729598	1635;54981	geneontology_Biological_Process	DCTD;NMRK1
GO:0007250	activation of NF-kappaB-inducing kinase activity	http://amigo.geneontology.org/amigo/term/GO:0007250	18	2	0.270883	7.38327	0.0294578	0.729598	3654;7098	geneontology_Biological_Process	TLR3;IRAK1
GO:0043433	negative regulation of DNA-binding transcription factor activity	http://amigo.geneontology.org/amigo/term/GO:0043433	155	6	2.3326	2.57224	0.0299986	0.738138	847;3654;6737;10293;11261;149951	geneontology_Biological_Process	CAT;TRIM21;CHP1;TRAIP;COMMD7;IRAK1
GO:0032204	regulation of telomere maintenance	http://amigo.geneontology.org/amigo/term/GO:0032204	78	4	1.17382	3.40766	0.0300618	0.738138	1736;4751;9212;79991	geneontology_Biological_Process	DKC1;STN1;AURKB;NEK2
GO:0045599	negative regulation of fat cell differentiation	http://amigo.geneontology.org/amigo/term/GO:0045599	45	3	0.677207	4.42996	0.030064	0.738138	1869;57761;122953	geneontology_Biological_Process	JDP2;E2F1;TRIB3
GO:0045023	G0 to G1 transition	http://amigo.geneontology.org/amigo/term/GO:0045023	45	3	0.677207	4.42996	0.030064	0.738138	1111;1869;11335	geneontology_Biological_Process	E2F1;CBX3;CHEK1
GO:0090342	regulation of cell aging	http://amigo.geneontology.org/amigo/term/GO:0090342	46	3	0.692256	4.33366	0.0318139	0.776038	2305;4000;54708	geneontology_Biological_Process	MARCH5;LMNA;FOXM1
GO:0048599	oocyte development	http://amigo.geneontology.org/amigo/term/GO:0048599	46	3	0.692256	4.33366	0.0318139	0.776038	891;6790;9319	geneontology_Biological_Process	AURKA;TRIP13;CCNB1
GO:0019205	nucleobase-containing compound kinase activity	http://amigo.geneontology.org/amigo/term/GO:0019205	46	3	0.692256	4.33366	0.0318139	0.776038	1716;7083;54981	geneontology_Molecular_Function	NMRK1;DGUOK;TK1
GO:0022414	reproductive process	http://amigo.geneontology.org/amigo/term/GO:0022414	1403	30	21.1138	1.42087	0.0323605	0.78342	699;891;991;995;1164;1869;4678;4751;5347;6790;7098;7153;7272;7417;7516;8438;8894;9156;9232;9319;9394;9700;10134;23397;23598;25788;25886;83540;146956;259266	geneontology_Biological_Process	BUB1;HS6ST1;VDAC2;CDC25C;TLR3;ASPM;PATZ1;CDC20;AURKA;TRIP13;E2F1;CCNB1;PTTG1;RAD54L;EIF2S2;NUF2;TOP2A;EXO1;NASP;NCAPH;ESPL1;EME1;TTK;BCAP31;CKS2;NEK2;PLK1;POC1A;RAD54B;XRCC2
GO:0018393	internal peptidyl-lysine acetylation	http://amigo.geneontology.org/amigo/term/GO:0018393	158	6	2.37775	2.5234	0.0325101	0.78342	86;1111;1810;10014;23522;55257	geneontology_Biological_Process	DR1;HDAC5;KAT6B;MRGBP;ACTL6A;CHEK1
GO:0071158	positive regulation of cell cycle arrest	http://amigo.geneontology.org/amigo/term/GO:0071158	80	4	1.20392	3.32247	0.0325751	0.78342	891;995;1869;6790	geneontology_Biological_Process	CDC25C;AURKA;E2F1;CCNB1
GO:0044346	fibroblast apoptotic process	http://amigo.geneontology.org/amigo/term/GO:0044346	19	2	0.285932	6.99468	0.0326021	0.78342	7516;51124	geneontology_Biological_Process	IER3IP1;XRCC2
GO:0009129	pyrimidine nucleoside monophosphate metabolic process	http://amigo.geneontology.org/amigo/term/GO:0009129	19	2	0.285932	6.99468	0.0326021	0.78342	1635;54981	geneontology_Biological_Process	DCTD;NMRK1
GO:0006488	dolichol-linked oligosaccharide biosynthetic process	http://amigo.geneontology.org/amigo/term/GO:0006488	19	2	0.285932	6.99468	0.0326021	0.78342	10195;85365	geneontology_Biological_Process	ALG2;ALG3
GO:0140142	nucleocytoplasmic carrier activity	http://amigo.geneontology.org/amigo/term/GO:0140142	19	2	0.285932	6.99468	0.0326021	0.78342	1434;10073	geneontology_Molecular_Function	SNUPN;CSE1L
GO:1903052	positive regulation of proteolysis involved in cellular protein catabolic process	http://amigo.geneontology.org/amigo/term/GO:1903052	118	5	1.77579	2.81565	0.0329904	0.789393	5347;5701;6790;10134;57761	geneontology_Biological_Process	AURKA;TRIB3;PSMC2;BCAP31;PLK1
GO:0051082	unfolded protein binding	http://amigo.geneontology.org/amigo/term/GO:0051082	118	5	1.77579	2.81565	0.0329904	0.789393	5203;8208;51103;55664;81572	geneontology_Molecular_Function	CDC37L1;NDUFAF1;PDRG1;PFDN4;CHAF1B
GO:0000003	reproduction	http://amigo.geneontology.org/amigo/term/GO:0000003	1406	30	21.1589	1.41784	0.0331598	0.791357	699;891;991;995;1164;1869;4678;4751;5347;6790;7098;7153;7272;7417;7516;8438;8894;9156;9232;9319;9394;9700;10134;23397;23598;25788;25886;83540;146956;259266	geneontology_Biological_Process	BUB1;HS6ST1;VDAC2;CDC25C;TLR3;ASPM;PATZ1;CDC20;AURKA;TRIP13;E2F1;CCNB1;PTTG1;RAD54L;EIF2S2;NUF2;TOP2A;EXO1;NASP;NCAPH;ESPL1;EME1;TTK;BCAP31;CKS2;NEK2;PLK1;POC1A;RAD54B;XRCC2
GO:0072594	establishment of protein localization to organelle	http://amigo.geneontology.org/amigo/term/GO:0072594	537	14	8.08133	1.73239	0.0332126	0.791357	30;847;1434;1736;1869;4000;6122;8766;9141;10005;10073;11261;118424;140823	geneontology_Biological_Process	SNUPN;CAT;DKC1;RPL3;UBE2J2;LMNA;RAB11A;ACAA1;CHP1;E2F1;ACOT8;CSE1L;PDCD5;ROMO1
GO:0032527	protein exit from endoplasmic reticulum	http://amigo.geneontology.org/amigo/term/GO:0032527	47	3	0.707305	4.24145	0.0336159	0.79928	9777;10134;56681	geneontology_Biological_Process	SAR1A;BCAP31;TM9SF4
GO:0051253	negative regulation of RNA metabolic process	http://amigo.geneontology.org/amigo/term/GO:0051253	1295	28	19.4885	1.43674	0.0337215	0.800106	166;332;1063;1153;1736;1789;1810;1869;2305;3660;4790;5347;9212;10014;10614;11335;23522;23598;51497;53820;55192;55635;55922;57708;57761;122953;144097;149951	geneontology_Biological_Process	DR1;NKRF;HEXIM1;NFKB1;DKC1;AES;MIER1;RIPPLY3;AURKB;DNAJC17;HDAC5;IRF2;JDP2;KAT6B;PATZ1;NELFCD;E2F1;DEPDC1;FOXM1;DNMT3B;CBX3;SPINDOC;TRIB3;BIRC5;CIRBP;CENPF;COMMD7;PLK1
GO:0008283	cell proliferation	http://amigo.geneontology.org/amigo/term/GO:0008283	1986	40	29.8874	1.33836	0.0338675	0.800422	332;699;891;990;991;995;1033;1063;1163;1164;1434;1736;1869;2010;2305;2773;3654;3660;4000;4176;4678;5347;7272;8324;8894;9133;9141;9212;9238;9837;10293;11004;22919;22974;53820;56992;81610;140823;162681;259266	geneontology_Biological_Process	BUB1;C18orf54;DKC1;CDC25C;LMNA;RIPPLY3;ASPM;AURKB;FZD7;GNAI3;IRF2;TPX2;CDC20;E2F1;KIF2C;CCNB1;CSE1L;FOXM1;PDCD5;EIF2S2;ROMO1;MAPRE1;MCM7;NASP;CDKN3;CKS1B;EMD;FAM83D;GINS1;TRAIP;BIRC5;TTK;CENPF;CKS2;IRAK1;KIF15;PLK1;TBRG4;CCNB2;CDC6
GO:0010833	telomere maintenance via telomere lengthening	http://amigo.geneontology.org/amigo/term/GO:0010833	81	4	1.21897	3.28145	0.0338765	0.800422	1736;4751;9212;79991	geneontology_Biological_Process	DKC1;STN1;AURKB;NEK2
GO:0004842	ubiquitin-protein transferase activity	http://amigo.geneontology.org/amigo/term/GO:0004842	390	11	5.86912	1.87421	0.0345813	0.815367	1643;6737;10293;11065;26234;26994;27338;29089;51191;54708;118424	geneontology_Molecular_Function	MARCH5;RNF11;TRIM21;UBE2J2;DDB2;FBXL5;HERC5;UBE2C;UBE2S;TRAIP;UBE2T
GO:0032436	positive regulation of proteasomal ubiquitin-dependent protein catabolic process	http://amigo.geneontology.org/amigo/term/GO:0032436	82	4	1.23402	3.24144	0.0352079	0.828413	5347;6790;10134;57761	geneontology_Biological_Process	AURKA;TRIB3;BCAP31;PLK1
GO:0031293	membrane protein intracellular domain proteolysis	http://amigo.geneontology.org/amigo/term/GO:0031293	20	2	0.300981	6.64494	0.0358713	0.83878	4790;84888	geneontology_Biological_Process	NFKB1;SPPL2A
GO:0006490	oligosaccharide-lipid intermediate biosynthetic process	http://amigo.geneontology.org/amigo/term/GO:0006490	20	2	0.300981	6.64494	0.0358713	0.83878	10195;85365	geneontology_Biological_Process	ALG2;ALG3
GO:0031683	G-protein beta/gamma-subunit complex binding	http://amigo.geneontology.org/amigo/term/GO:0031683	20	2	0.300981	6.64494	0.0358713	0.83878	2773;9630	geneontology_Molecular_Function	GNA14;GNAI3
GO:0043488	regulation of mRNA stability	http://amigo.geneontology.org/amigo/term/GO:0043488	121	5	1.82093	2.74584	0.0361729	0.844084	1153;1869;9238;10643;10644	geneontology_Biological_Process	E2F1;IGF2BP3;CIRBP;IGF2BP2;TBRG4
GO:0048145	regulation of fibroblast proliferation	http://amigo.geneontology.org/amigo/term/GO:0048145	83	4	1.24907	3.20238	0.0365692	0.849821	891;990;1869;2010	geneontology_Biological_Process	E2F1;CCNB1;EMD;CDC6
GO:0003777	microtubule motor activity	http://amigo.geneontology.org/amigo/term/GO:0003777	83	4	1.24907	3.20238	0.0365692	0.849821	3797;11004;24137;56992	geneontology_Molecular_Function	KIF3C;KIF2C;KIF15;KIF4A
GO:0051100	negative regulation of binding	http://amigo.geneontology.org/amigo/term/GO:0051100	163	6	2.45299	2.44599	0.0369926	0.856136	166;1869;4751;6790;8904;9212	geneontology_Biological_Process	AES;AURKB;AURKA;E2F1;CPNE1;NEK2
GO:0006475	internal protein amino acid acetylation	http://amigo.geneontology.org/amigo/term/GO:0006475	163	6	2.45299	2.44599	0.0369926	0.856136	86;1111;1810;10014;23522;55257	geneontology_Biological_Process	DR1;HDAC5;KAT6B;MRGBP;ACTL6A;CHEK1
GO:0032648	regulation of interferon-beta production	http://amigo.geneontology.org/amigo/term/GO:0032648	49	3	0.737403	4.06833	0.0373758	0.85972	7098;10293;10623	geneontology_Biological_Process	POLR3C;TLR3;TRAIP
GO:0050661	NADP binding	http://amigo.geneontology.org/amigo/term/GO:0050661	49	3	0.737403	4.06833	0.0373758	0.85972	847;2597;9380	geneontology_Molecular_Function	CAT;GRHPR;GAPDH
hsa00510	N-Glycan biosynthesis	http://www.kegg.jp/kegg-bin/show_pathway?hsa00510+10195+6185+85365	49	3	0.737403	4.06833	0.0373758	0.85972	10195;6185;85365	pathway_KEGG	ALG2;ALG3;RPN2
GO:0048144	fibroblast proliferation	http://amigo.geneontology.org/amigo/term/GO:0048144	84	4	1.26412	3.16426	0.0379606	0.869629	891;990;1869;2010	geneontology_Biological_Process	E2F1;CCNB1;EMD;CDC6
GO:0048477	oogenesis	http://amigo.geneontology.org/amigo/term/GO:0048477	84	4	1.26412	3.16426	0.0379606	0.869629	891;6790;9319;259266	geneontology_Biological_Process	ASPM;AURKA;TRIP13;CCNB1
GO:0016556	mRNA modification	http://amigo.geneontology.org/amigo/term/GO:0016556	21	2	0.31603	6.32852	0.0392612	0.881404	1736;115708	geneontology_Biological_Process	TRMT61A;DKC1
GO:0055093	response to hyperoxia	http://amigo.geneontology.org/amigo/term/GO:0055093	21	2	0.31603	6.32852	0.0392612	0.881404	847;1789	geneontology_Biological_Process	CAT;DNMT3B
GO:0071359	cellular response to dsRNA	http://amigo.geneontology.org/amigo/term/GO:0071359	21	2	0.31603	6.32852	0.0392612	0.881404	4790;7098	geneontology_Biological_Process	NFKB1;TLR3
GO:1990182	exosomal secretion	http://amigo.geneontology.org/amigo/term/GO:1990182	21	2	0.31603	6.32852	0.0392612	0.881404	5873;8766	geneontology_Biological_Process	RAB27A;RAB11A
GO:0004298	threonine-type endopeptidase activity	http://amigo.geneontology.org/amigo/term/GO:0004298	21	2	0.31603	6.32852	0.0392612	0.881404	5688;5690	geneontology_Molecular_Function	PSMA7;PSMB2
GO:0070003	threonine-type peptidase activity	http://amigo.geneontology.org/amigo/term/GO:0070003	21	2	0.31603	6.32852	0.0392612	0.881404	5688;5690	geneontology_Molecular_Function	PSMA7;PSMB2
GO:0033059	cellular pigmentation	http://amigo.geneontology.org/amigo/term/GO:0033059	50	3	0.752452	3.98697	0.0393331	0.881404	5873;8766;84079	geneontology_Biological_Process	RAB27A;RAB11A;ANKRD27
GO:1902369	negative regulation of RNA catabolic process	http://amigo.geneontology.org/amigo/term/GO:1902369	50	3	0.752452	3.98697	0.0393331	0.881404	1153;1736;1869	geneontology_Biological_Process	DKC1;E2F1;CIRBP
GO:0032206	positive regulation of telomere maintenance	http://amigo.geneontology.org/amigo/term/GO:0032206	50	3	0.752452	3.98697	0.0393331	0.881404	1736;4751;9212	geneontology_Biological_Process	DKC1;AURKB;NEK2
GO:0036297	interstrand cross-link repair	http://amigo.geneontology.org/amigo/term/GO:0036297	50	3	0.752452	3.98697	0.0393331	0.881404	10635;29089;146956	geneontology_Biological_Process	RAD51AP1;EME1;UBE2T
GO:0003743	translation initiation factor activity	http://amigo.geneontology.org/amigo/term/GO:0003743	50	3	0.752452	3.98697	0.0393331	0.881404	8662;8894;10289	geneontology_Molecular_Function	EIF1B;EIF3B;EIF2S2
GO:0045859	regulation of protein kinase activity	http://amigo.geneontology.org/amigo/term/GO:0045859	761	18	11.4523	1.57173	0.0395175	0.883784	891;990;995;1033;1163;1164;1846;1848;3654;5347;7098;8682;9133;10614;11261;22974;51191;57761	geneontology_Biological_Process	PEA15;HEXIM1;DUSP4;CDC25C;TLR3;CHP1;DUSP6;HERC5;TPX2;CCNB1;CDKN3;CKS1B;TRIB3;CKS2;IRAK1;PLK1;CCNB2;CDC6
GO:0018394	peptidyl-lysine acetylation	http://amigo.geneontology.org/amigo/term/GO:0018394	166	6	2.49814	2.40179	0.039863	0.887994	86;1111;1810;10014;23522;55257	geneontology_Biological_Process	DR1;HDAC5;KAT6B;MRGBP;ACTL6A;CHEK1
hsa03013	RNA transport	http://www.kegg.jp/kegg-bin/show_pathway?hsa03013+10073+10289+1915+8480+8662+8894	166	6	2.49814	2.40179	0.039863	0.887994	10073;10289;1915;8480;8662;8894	pathway_KEGG	EIF1B;SNUPN;EEF1A1;EIF3B;EIF2S2;RAE1
GO:0042623	ATPase activity, coupled	http://amigo.geneontology.org/amigo/term/GO:0042623	352	10	5.29726	1.88777	0.0410169	0.906622	537;4176;5701;5984;7153;7516;10721;25788;54821;79075	geneontology_Molecular_Function	ATP6AP1;DSCC1;ERCC6L;TOP2A;MCM7;PSMC2;RFC4;POLQ;RAD54B;XRCC2
GO:0016071	mRNA metabolic process	http://amigo.geneontology.org/amigo/term/GO:0016071	765	18	11.5125	1.56352	0.0412354	0.906622	891;1153;1736;1869;3185;6122;6628;6637;6638;9238;10073;10286;10643;10644;22913;55094;56259;115708	geneontology_Biological_Process	HNRNPF;SNUPN;GPATCH1;TRMT61A;SNRPN;DKC1;RPL3;BCAS2;E2F1;RALY;CCNB1;CTNNBL1;IGF2BP3;SNRPB;SNRPG;CIRBP;IGF2BP2;TBRG4
GO:0051972	regulation of telomerase activity	http://amigo.geneontology.org/amigo/term/GO:0051972	51	3	0.767501	3.90879	0.0413415	0.906622	1736;4751;9212	geneontology_Biological_Process	DKC1;AURKB;NEK2
GO:0009994	oocyte differentiation	http://amigo.geneontology.org/amigo/term/GO:0009994	51	3	0.767501	3.90879	0.0413415	0.906622	891;6790;9319	geneontology_Biological_Process	AURKA;TRIP13;CCNB1
GO:0032608	interferon-beta production	http://amigo.geneontology.org/amigo/term/GO:0032608	51	3	0.767501	3.90879	0.0413415	0.906622	7098;10293;10623	geneontology_Biological_Process	POLR3C;TLR3;TRAIP
GO:0015459	potassium channel regulator activity	http://amigo.geneontology.org/amigo/term/GO:0015459	51	3	0.767501	3.90879	0.0413415	0.906622	10776;11261;27094	geneontology_Molecular_Function	ARPP19;CHP1;KCNMB3
GO:0003678	DNA helicase activity	http://amigo.geneontology.org/amigo/term/GO:0003678	51	3	0.767501	3.90879	0.0413415	0.906622	4176;9837;25788	geneontology_Molecular_Function	MCM7;GINS1;RAD54B
GO:0017112	Rab guanyl-nucleotide exchange factor activity	http://amigo.geneontology.org/amigo/term/GO:0017112	51	3	0.767501	3.90879	0.0413415	0.906622	9610;79961;84079	geneontology_Molecular_Function	DENND2D;RIN1;ANKRD27
hsa05170	Human immunodeficiency virus 1 infection	http://www.kegg.jp/kegg-bin/show_pathway?hsa05170+1111+2773+3654+4790+891+9133+995	212	7	3.1904	2.19409	0.0417549	0.913915	1111;2773;3654;4790;891;9133;995	pathway_KEGG	NFKB1;CDC25C;GNAI3;CCNB1;CHEK1;IRAK1;CCNB2
GO:0031058	positive regulation of histone modification	http://amigo.geneontology.org/amigo/term/GO:0031058	87	4	1.30927	3.05515	0.042315	0.921784	891;1789;4000;122953	geneontology_Biological_Process	LMNA;JDP2;CCNB1;DNMT3B
GO:0008135	translation factor activity, RNA binding	http://amigo.geneontology.org/amigo/term/GO:0008135	87	4	1.30927	3.05515	0.042315	0.921784	1915;8662;8894;10289	geneontology_Molecular_Function	EIF1B;EEF1A1;EIF3B;EIF2S2
GO:1904385	cellular response to angiotensin	http://amigo.geneontology.org/amigo/term/GO:1904385	22	2	0.331079	6.04086	0.0427674	0.921784	990;4790	geneontology_Biological_Process	NFKB1;CDC6
GO:0032402	melanosome transport	http://amigo.geneontology.org/amigo/term/GO:0032402	22	2	0.331079	6.04086	0.0427674	0.921784	5873;8766	geneontology_Biological_Process	RAB27A;RAB11A
GO:0097734	extracellular exosome biogenesis	http://amigo.geneontology.org/amigo/term/GO:0097734	22	2	0.331079	6.04086	0.0427674	0.921784	5873;8766	geneontology_Biological_Process	RAB27A;RAB11A
GO:0070840	dynein complex binding	http://amigo.geneontology.org/amigo/term/GO:0070840	22	2	0.331079	6.04086	0.0427674	0.921784	1063;29899	geneontology_Molecular_Function	CENPF;GPSM2
GO:0070034	telomerase RNA binding	http://amigo.geneontology.org/amigo/term/GO:0070034	22	2	0.331079	6.04086	0.0427674	0.921784	1736;6628	geneontology_Molecular_Function	DKC1;SNRPB
GO:0000030	mannosyltransferase activity	http://amigo.geneontology.org/amigo/term/GO:0000030	22	2	0.331079	6.04086	0.0427674	0.921784	10195;85365	geneontology_Molecular_Function	ALG2;ALG3
GO:1903322	positive regulation of protein modification by small protein conjugation or removal	http://amigo.geneontology.org/amigo/term/GO:1903322	127	5	1.91123	2.61612	0.0430885	0.926936	991;5347;11065;27338;57761	geneontology_Biological_Process	UBE2C;CDC20;UBE2S;TRIB3;PLK1
GO:0048146	positive regulation of fibroblast proliferation	http://amigo.geneontology.org/amigo/term/GO:0048146	52	3	0.78255	3.83362	0.0434006	0.930108	891;990;1869	geneontology_Biological_Process	E2F1;CCNB1;CDC6
GO:0043331	response to dsRNA	http://amigo.geneontology.org/amigo/term/GO:0043331	52	3	0.78255	3.83362	0.0434006	0.930108	4790;6520;7098	geneontology_Biological_Process	NFKB1;SLC3A2;TLR3
GO:0006508	proteolysis	http://amigo.geneontology.org/amigo/term/GO:0006508	1731	35	26.0499	1.34358	0.043805	0.936995	86;332;891;991;1643;1992;2597;4790;5347;5624;5688;5690;5701;5710;6737;6790;8904;9141;9212;9232;9306;9700;10134;11047;11065;26234;26994;27338;56925;57761;80013;84888;118424;220213;389856	geneontology_Biological_Process	SERPINB1;NFKB1;SPPL2A;USP27X;PROC;RNF11;TRIM21;UBE2J2;LXN;MINDY3;SOCS6;AURKB;DDB2;FBXL5;OTUD1;UBE2C;CDC20;AURKA;ADRM1;CCNB1;UBE2S;PDCD5;PTTG1;CPNE1;PSMD4;ESPL1;TRIB3;BIRC5;GAPDH;PSMA7;PSMC2;ACTL6A;BCAP31;PLK1;PSMB2
GO:1903507	negative regulation of nucleic acid-templated transcription	http://amigo.geneontology.org/amigo/term/GO:1903507	1215	26	18.2846	1.42196	0.0443287	0.946405	166;332;1063;1789;1810;1869;2305;3660;4790;5347;9212;10014;10614;11335;23522;23598;51497;53820;55192;55635;55922;57708;57761;122953;144097;149951	geneontology_Biological_Process	DR1;NKRF;HEXIM1;NFKB1;AES;MIER1;RIPPLY3;AURKB;DNAJC17;HDAC5;IRF2;JDP2;KAT6B;PATZ1;NELFCD;E2F1;DEPDC1;FOXM1;DNMT3B;CBX3;SPINDOC;TRIB3;BIRC5;CENPF;COMMD7;PLK1
GO:0010629	negative regulation of gene expression	http://amigo.geneontology.org/amigo/term/GO:0010629	1733	35	26.08	1.34203	0.0444162	0.946485	166;332;891;1063;1153;1789;1810;1869;2305;2597;3660;4790;5347;6122;8904;9212;9238;10014;10614;10643;10644;11335;23522;23598;51006;51497;53820;55192;55635;55922;57708;57761;122953;144097;149951	geneontology_Biological_Process	DR1;NKRF;HEXIM1;NFKB1;RPL3;AES;MIER1;RIPPLY3;AURKB;DNAJC17;HDAC5;IRF2;JDP2;KAT6B;PATZ1;NELFCD;E2F1;DEPDC1;CCNB1;SLC35C2;FOXM1;CPNE1;DNMT3B;CBX3;IGF2BP3;SPINDOC;TRIB3;BIRC5;CIRBP;GAPDH;IGF2BP2;CENPF;COMMD7;PLK1;TBRG4
GO:0019882	antigen processing and presentation	http://amigo.geneontology.org/amigo/term/GO:0019882	171	6	2.57339	2.33156	0.0449539	0.956137	3797;5873;10134;11004;24137;56992	geneontology_Biological_Process	RAB27A;KIF3C;KIF2C;BCAP31;KIF15;KIF4A
GO:1902679	negative regulation of RNA biosynthetic process	http://amigo.geneontology.org/amigo/term/GO:1902679	1217	26	18.3147	1.41963	0.0450628	0.956653	166;332;1063;1789;1810;1869;2305;3660;4790;5347;9212;10014;10614;11335;23522;23598;51497;53820;55192;55635;55922;57708;57761;122953;144097;149951	geneontology_Biological_Process	DR1;NKRF;HEXIM1;NFKB1;AES;MIER1;RIPPLY3;AURKB;DNAJC17;HDAC5;IRF2;JDP2;KAT6B;PATZ1;NELFCD;E2F1;DEPDC1;FOXM1;DNMT3B;CBX3;SPINDOC;TRIB3;BIRC5;CENPF;COMMD7;PLK1
GO:0043393	regulation of protein binding	http://amigo.geneontology.org/amigo/term/GO:0043393	216	7	3.25059	2.15345	0.0453875	0.959485	166;5347;6790;9212;10014;22919;57761	geneontology_Biological_Process	AES;AURKB;HDAC5;AURKA;MAPRE1;TRIB3;PLK1
GO:0043392	negative regulation of DNA binding	http://amigo.geneontology.org/amigo/term/GO:0043392	53	3	0.797599	3.76129	0.0455102	0.959485	1869;4751;8904	geneontology_Biological_Process	E2F1;CPNE1;NEK2
GO:1901796	regulation of signal transduction by p53 class mediator	http://amigo.geneontology.org/amigo/term/GO:1901796	129	5	1.94133	2.57556	0.0455585	0.959485	1111;6790;9212;10614;22974	geneontology_Biological_Process	HEXIM1;AURKB;TPX2;AURKA;CHEK1
GO:1903320	regulation of protein modification by small protein conjugation or removal	http://amigo.geneontology.org/amigo/term/GO:1903320	217	7	3.26564	2.14353	0.0463264	0.959485	991;5347;6737;11065;11261;27338;57761	geneontology_Biological_Process	TRIM21;CHP1;UBE2C;CDC20;UBE2S;TRIB3;PLK1
GO:0032401	establishment of melanosome localization	http://amigo.geneontology.org/amigo/term/GO:0032401	23	2	0.346128	5.77821	0.0463856	0.959485	5873;8766	geneontology_Biological_Process	RAB27A;RAB11A
GO:0051904	pigment granule transport	http://amigo.geneontology.org/amigo/term/GO:0051904	23	2	0.346128	5.77821	0.0463856	0.959485	5873;8766	geneontology_Biological_Process	RAB27A;RAB11A
GO:1903010	regulation of bone development	http://amigo.geneontology.org/amigo/term/GO:1903010	23	2	0.346128	5.77821	0.0463856	0.959485	537;202018	geneontology_Biological_Process	TAPT1;ATP6AP1
GO:0051570	regulation of histone H3-K9 methylation	http://amigo.geneontology.org/amigo/term/GO:0051570	23	2	0.346128	5.77821	0.0463856	0.959485	1789;4000	geneontology_Biological_Process	LMNA;DNMT3B
GO:0048103	somatic stem cell division	http://amigo.geneontology.org/amigo/term/GO:0048103	23	2	0.346128	5.77821	0.0463856	0.959485	8324;259266	geneontology_Biological_Process	ASPM;FZD7
GO:0000132	establishment of mitotic spindle orientation	http://amigo.geneontology.org/amigo/term/GO:0000132	23	2	0.346128	5.77821	0.0463856	0.959485	1058;29899	geneontology_Biological_Process	CENPA;GPSM2
GO:0070193	synaptonemal complex organization	http://amigo.geneontology.org/amigo/term/GO:0070193	23	2	0.346128	5.77821	0.0463856	0.959485	5347;9319	geneontology_Biological_Process	TRIP13;PLK1
GO:0010499	proteasomal ubiquitin-independent protein catabolic process	http://amigo.geneontology.org/amigo/term/GO:0010499	23	2	0.346128	5.77821	0.0463856	0.959485	5688;5690	geneontology_Biological_Process	PSMA7;PSMB2
GO:0016769	transferase activity, transferring nitrogenous groups	http://amigo.geneontology.org/amigo/term/GO:0016769	23	2	0.346128	5.77821	0.0463856	0.959485	2597;56267	geneontology_Molecular_Function	KYAT3;GAPDH
hsa03430	Mismatch repair	http://www.kegg.jp/kegg-bin/show_pathway?hsa03430+5984+9156	23	2	0.346128	5.77821	0.0463856	0.959485	5984;9156	pathway_KEGG	EXO1;RFC4
GO:0018205	peptidyl-lysine modification	http://amigo.geneontology.org/amigo/term/GO:0018205	360	10	5.41765	1.84582	0.0465105	0.96031	86;1111;1789;1810;4000;10014;10054;23522;55257;84661	geneontology_Biological_Process	DR1;UBA2;LMNA;HDAC5;KAT6B;MRGBP;DNMT3B;DPY30;ACTL6A;CHEK1
GO:0061135	endopeptidase regulator activity	http://amigo.geneontology.org/amigo/term/GO:0061135	173	6	2.60348	2.3046	0.0470987	0.97068	332;1992;2597;9232;11047;56925	geneontology_Molecular_Function	SERPINB1;LXN;ADRM1;PTTG1;BIRC5;GAPDH
GO:0071453	cellular response to oxygen levels	http://amigo.geneontology.org/amigo/term/GO:0071453	174	6	2.61853	2.29136	0.0481945	0.990612	537;891;1789;1869;3654;4000	geneontology_Biological_Process	LMNA;ATP6AP1;E2F1;CCNB1;DNMT3B;IRAK1
GO:0051054	positive regulation of DNA metabolic process	http://amigo.geneontology.org/amigo/term/GO:0051054	219	7	3.29574	2.12395	0.0482413	0.990612	1736;2305;4751;5984;9212;79075;79991	geneontology_Biological_Process	DKC1;STN1;AURKB;FOXM1;DSCC1;RFC4;NEK2

## Sheet: GO_proteome
GO analysis on frequently dysregulated proteins
geneSet	description	link	size	overlap	expect	enrichmentRatio	pValue	FDR	overlapId	database	userId
hsa04610	Complement and coagulation cascades	http://www.kegg.jp/kegg-bin/show_pathway?hsa04610+2147+2243+3075+3827+5340+5345+629+710+713+714+715+716+721+722+727+729+731+732+733+735+7448	79	21	1.24231	16.904	0	0	2147;2243;3075;3827;5340;5345;629;710;713;714;715;716;721;722;727;729;731;732;733;735;7448	pathway_KEGG	C8A;C4B;C8G;C1QC;C5;C6;C8B;FGA;PLG;SERPING1;VTN;C1QB;C4BPA;C9;C1S;KNG1;SERPINF2;C1R;CFB;CFH;F2
GO:2000257	regulation of protein activation cascade	http://amigo.geneontology.org/amigo/term/GO:2000257	50	17	0.78627	21.6211	0	0	629;710;713;714;715;716;722;727;729;731;732;733;735;2147;3075;5199;7448	geneontology_Biological_Process	C8A;C8G;C1QC;C5;C6;C8B;CFP;SERPING1;VTN;C1QB;C4BPA;C9;C1S;C1R;CFB;CFH;F2
GO:0030449	regulation of complement activation	http://amigo.geneontology.org/amigo/term/GO:0030449	49	17	0.770544	22.0623	0	0	629;710;713;714;715;716;722;727;729;731;732;733;735;2147;3075;5199;7448	geneontology_Biological_Process	C8A;C8G;C1QC;C5;C6;C8B;CFP;SERPING1;VTN;C1QB;C4BPA;C9;C1S;C1R;CFB;CFH;F2
GO:0072376	protein activation cascade	http://amigo.geneontology.org/amigo/term/GO:0072376	92	19	1.44674	13.133	2.22045e-16	4.17962e-13	629;710;713;714;715;716;722;727;729;731;732;733;735;2147;2243;3075;3827;5199;7448	geneontology_Biological_Process	C8A;C8G;C1QC;C5;C6;C8B;CFP;FGA;SERPING1;VTN;C1QB;C4BPA;C9;C1S;KNG1;C1R;CFB;CFH;F2
GO:0002920	regulation of humoral immune response	http://amigo.geneontology.org/amigo/term/GO:0002920	68	17	1.06933	15.8978	2.22045e-16	4.17962e-13	629;710;713;714;715;716;722;727;729;731;732;733;735;2147;3075;5199;7448	geneontology_Biological_Process	C8A;C8G;C1QC;C5;C6;C8B;CFP;SERPING1;VTN;C1QB;C4BPA;C9;C1S;C1R;CFB;CFH;F2
GO:0006956	complement activation	http://amigo.geneontology.org/amigo/term/GO:0006956	68	17	1.06933	15.8978	2.22045e-16	4.17962e-13	629;710;713;714;715;716;722;727;729;731;732;733;735;2147;3075;5199;7448	geneontology_Biological_Process	C8A;C8G;C1QC;C5;C6;C8B;CFP;SERPING1;VTN;C1QB;C4BPA;C9;C1S;C1R;CFB;CFH;F2
GO:0070613	regulation of protein processing	http://amigo.geneontology.org/amigo/term/GO:0070613	110	20	1.72979	11.5621	5.55112e-16	8.95633e-13	629;710;713;714;715;716;722;727;729;731;732;733;735;2147;3075;5199;5345;7057;7123;7448	geneontology_Biological_Process	C8A;C8G;C1QC;C5;C6;C8B;CFP;SERPING1;THBS1;VTN;C1QB;C4BPA;C9;C1S;CLEC3B;SERPINF2;C1R;CFB;CFH;F2
GO:1903317	regulation of protein maturation	http://amigo.geneontology.org/amigo/term/GO:1903317	112	20	1.76124	11.3556	7.77156e-16	1.09715e-12	629;710;713;714;715;716;722;727;729;731;732;733;735;2147;3075;5199;5345;7057;7123;7448	geneontology_Biological_Process	C8A;C8G;C1QC;C5;C6;C8B;CFP;SERPING1;THBS1;VTN;C1QB;C4BPA;C9;C1S;CLEC3B;SERPINF2;C1R;CFB;CFH;F2
GO:0002526	acute inflammatory response	http://amigo.geneontology.org/amigo/term/GO:0002526	154	21	2.42171	8.67155	3.9635e-14	4.97375e-11	197;629;710;713;714;715;716;722;727;729;731;732;733;735;2147;3075;5199;5345;6774;7448;23780	geneontology_Biological_Process	C8A;C8G;STAT3;APOL2;C1QC;C5;C6;C8B;CFP;SERPING1;VTN;AHSG;C1QB;C4BPA;C9;C1S;SERPINF2;C1R;CFB;CFH;F2
GO:0002673	regulation of acute inflammatory response	http://amigo.geneontology.org/amigo/term/GO:0002673	92	17	1.44674	11.7506	6.61693e-14	7.47316e-11	629;710;713;714;715;716;722;727;729;731;732;733;735;2147;3075;5199;7448	geneontology_Biological_Process	C8A;C8G;C1QC;C5;C6;C8B;CFP;SERPING1;VTN;C1QB;C4BPA;C9;C1S;C1R;CFB;CFH;F2
GO:0006958	complement activation, classical pathway	http://amigo.geneontology.org/amigo/term/GO:0006958	34	12	0.534664	22.444	7.28306e-14	7.47772e-11	710;713;714;715;716;722;727;729;731;732;733;735	geneontology_Biological_Process	C8A;C8G;C1QC;C5;C6;C8B;SERPING1;C1QB;C4BPA;C9;C1S;C1R
GO:0003723	RNA binding	http://amigo.geneontology.org/amigo/term/GO:0003723	1603	66	25.2078	2.61824	1.91402e-13	1.80142e-10	16;226;292;301;372;722;988;1653;1786;1854;1974;2923;2962;3028;3069;3182;3190;3428;3608;3843;4035;5315;5591;5813;5832;5905;6150;6294;6742;6780;7150;7153;7205;7430;7458;7818;7913;8243;8886;9188;9238;9667;10056;10128;10449;22913;22916;23196;23277;23350;23586;23589;24148;26523;27000;51069;51095;51663;54464;55037;55127;55661;57038;57062;192669;192670	geneontology_Molecular_Function	PKM;AGO3;ANXA1;EIF4A2;IFI16;PTCD3;SLC25A5;ACAA2;AGO1;ALDOA;DDX1;DDX24;DDX58;DUT;HDLBP;HNRNPK;HSD17B10;LRP1;MRPL2;PDIA3;RANGAP1;RARS2;TBRG4;AGO4;ARCN1;C4BPA;CARHSP1;RALY;STAU1;SAFB2;DDX27;SAFB;SSBP1;TOP1;TOP2A;TRNT1;CDC5L;DEK;GTF2F1;HNRNPAB;LRPPRC;NCBP2;PRKDC;PRPF6;PURA;SMC1A;TRIP6;ALDH18A1;CLUH;DAP3;DDX21;DNAJC2;EIF4H;FARSB;HEATR1;ILF2;IPO5;MRPL23;U2SURP;XRN1;ZFR;AARS;DDX18;DNMT1;EZR;FAM120A
GO:0002455	humoral immune response mediated by circulating immunoglobulin	http://amigo.geneontology.org/amigo/term/GO:0002455	46	12	0.723368	16.5891	4.36651e-12	3.79349e-09	710;713;714;715;716;722;727;729;731;732;733;735	geneontology_Biological_Process	C8A;C8G;C1QC;C5;C6;C8B;SERPING1;C1QB;C4BPA;C9;C1S;C1R
GO:0006957	complement activation, alternative pathway	http://amigo.geneontology.org/amigo/term/GO:0006957	14	8	0.220156	36.3379	9.36362e-12	7.55377e-09	629;727;731;732;733;735;3075;5199	geneontology_Biological_Process	C8A;C8G;C5;C8B;CFP;C9;CFB;CFH
GO:0019752	carboxylic acid metabolic process	http://amigo.geneontology.org/amigo/term/GO:0019752	960	46	15.0964	3.04709	1.16187e-11	8.2327e-09	16;18;191;226;301;471;593;857;1503;2110;2584;2639;2729;2730;2938;3028;3098;3698;3939;5315;5351;5832;6774;7358;8854;8942;10005;10056;10449;23395;23475;23564;23576;26027;26063;28976;29968;51084;51703;55577;55902;56898;57038;79731;84245;197322	geneontology_Biological_Process	PKM;ACSL5;ANXA1;DDAH2;LDHA;PLOD1;STAT3;ACAA2;ACSS2;ALDOA;ATIC;CAV1;DDAH1;ETFDH;GALK1;GCDH;GCLC;GCLM;GSTA1;HK1;HSD17B10;ITIH2;KYNU;NAGK;NARS2;QPRT;RARS2;ACAD9;ACOT11;ACSF3;ALDH1A2;BCKDHA;BDH2;ACOT8;CRYL1;CTPS1;DECR2;MRI1;ABAT;ALDH18A1;FARSB;LARS2;PSAT1;UGDH;AARS;AHCY
GO:0016485	protein processing	http://amigo.geneontology.org/amigo/term/GO:0016485	251	23	3.94707	5.8271	1.16631e-11	8.2327e-09	629;710;713;714;715;716;722;727;729;731;732;733;735;2147;2243;3075;3428;5199;5345;7057;7123;7448;84301	geneontology_Biological_Process	C8A;C8G;IFI16;C1QC;C5;C6;C8B;CFP;FGA;SERPING1;THBS1;VTN;C1QB;C4BPA;C9;C1S;CLEC3B;SERPINF2;C1R;CFB;CFH;DDI2;F2
GO:0002697	regulation of immune effector process	http://amigo.geneontology.org/amigo/term/GO:0002697	381	28	5.99138	4.67338	1.31858e-11	8.76002e-09	301;335;629;710;713;714;715;716;722;727;729;731;732;733;735;1653;2147;2956;3075;3098;5199;5591;6778;7448;9188;23586;83666;151636	geneontology_Biological_Process	C8A;ANXA1;C8G;C1QC;C5;C6;C8B;CFP;DDX1;DDX58;DTX3L;HK1;PARP9;SERPING1;VTN;APOA1;C1QB;C4BPA;C9;MSH6;PRKDC;C1S;DDX21;STAT6;C1R;CFB;CFH;F2
hsa01100	Metabolic pathways	http://www.kegg.jp/kegg-bin/show_pathway?hsa01100+10005+10449+1503+178+1786+18+1841+1854+191+219+226+23475+2584+2639+2729+2730+29968+3028+30833+3098+3939+4705+471+51084+51606+51703+523+5238+53+5315+55349+55577+55750+55902+55967+56898+5832+593+622+644+64425+645+6697+7086+7358+7389+79017+79611+84245+8693+8760+8854+8942+9296	1305	54	20.5216	2.63137	4.07878e-11	2.55921e-08	10005;10449;1503;178;1786;18;1841;1854;191;219;226;23475;2584;2639;2729;2730;29968;3028;30833;3098;3939;4705;471;51084;51606;51703;523;5238;53;5315;55349;55577;55750;55902;55967;56898;5832;593;622;644;64425;645;6697;7086;7358;7389;79017;79611;84245;8693;8760;8854;8942;9296	pathway_KEGG	PKM;ACSL5;BDH1;CHDH;LDHA;NT5C;ACAA2;ACSS2;ALDOA;ATIC;BLVRB;DUT;GALK1;GALNT4;GCDH;GCLC;GCLM;HK1;HSD17B10;KYNU;NAGK;PGM3;POLR1E;QPRT;ACSS3;AGK;AGL;ALDH1A2;ALDH1B1;BCKDHA;BDH2;ACOT8;CRYL1;CTPS1;GGCT;MRI1;NDUFA10;ABAT;ALDH18A1;ATP6V1A;ATP6V1F;NDUFA12;PSAT1;SPR;TKT;UGDH;UROD;ACP2;AHCY;ATP6V1H;BLVRA;CDS2;DNMT1;DTYMK
GO:1901566	organonitrogen compound biosynthetic process	http://amigo.geneontology.org/amigo/term/GO:1901566	1776	65	27.9283	2.32739	5.70037e-11	3.38842e-08	16;18;226;335;348;471;1503;1653;1841;1854;1974;2584;2639;2729;2730;2938;3098;3190;3939;5238;5315;5351;5813;5832;6059;6150;6697;6774;7057;7358;7389;7458;7818;8760;8942;10005;10056;10128;10165;10318;10565;22916;23395;23475;26523;29968;50808;51069;51182;51703;54464;55037;55349;55571;55750;55902;56898;57038;79017;79731;83666;84245;192669;192670;197322	geneontology_Biological_Process	PKM;ACSL5;AGO3;APOE;CHDH;EIF4A2;LDHA;PLOD1;PTCD3;STAT3;TNIP1;ABCE1;ACSS2;AGO1;ALDOA;ATIC;CNOT11;DDX1;DUT;GALK1;GCDH;GCLC;GCLM;GSTA1;HK1;HNRNPK;KYNU;MRPL2;NARS2;PARP9;PGM3;QPRT;RARS2;THBS1;ACSF3;AGK;AGO4;APOA1;ARFGEF1;BDH2;ACOT8;CTPS1;GGCT;HSPA14;LRPPRC;MRI1;NCBP2;PURA;ABAT;AK3;ALDH18A1;DAP3;EIF4H;FARSB;LARS2;MRPL23;PSAT1;SLC25A13;SPR;UGDH;UROD;XRN1;AARS;CDS2;DTYMK
GO:0044281	small molecule metabolic process	http://amigo.geneontology.org/amigo/term/GO:0044281	1960	69	30.8218	2.23868	6.97216e-11	3.93718e-08	16;18;191;219;226;301;335;348;471;523;593;622;857;1503;1841;1854;2110;2584;2638;2639;2729;2730;2938;3028;3069;3098;3698;3939;4705;5238;5315;5351;5832;6697;6774;7086;7358;8542;8760;8854;8942;10005;10056;10165;10449;23395;23475;23564;23576;23780;26027;26063;28976;29968;30833;50808;51084;51218;51703;55577;55902;55967;56898;57038;79611;79731;83666;84245;197322	geneontology_Biological_Process	PKM;ACSL5;ANXA1;APOE;BDH1;DDAH2;LDHA;NT5C;PLOD1;STAT3;ACAA2;ACSS2;ALDOA;APOL2;ATIC;CAV1;DDAH1;DUT;ETFDH;GALK1;GC;GCDH;GCLC;GCLM;GSTA1;HDLBP;HK1;HSD17B10;ITIH2;KYNU;NAGK;NARS2;PARP9;PGM3;QPRT;RARS2;ACAD9;ACOT11;ACSF3;ACSS3;ALDH1A2;ALDH1B1;APOA1;APOL1;BCKDHA;BDH2;ACOT8;CRYL1;CTPS1;DECR2;MRI1;NDUFA10;ABAT;AK3;ALDH18A1;ATP6V1A;FARSB;GLRX5;LARS2;NDUFA12;PSAT1;SLC25A13;SPR;TKT;UGDH;AARS;AHCY;CDS2;DTYMK
GO:0051186	cofactor metabolic process	http://amigo.geneontology.org/amigo/term/GO:0051186	546	32	8.58607	3.72697	1.5733e-10	8.46134e-08	191;226;259;471;644;645;2584;2639;2729;2730;2878;2938;3098;3939;5315;6697;6774;7086;7389;8942;10005;23475;25824;26027;29968;51703;55902;56898;79017;83666;84245;197322	geneontology_Biological_Process	PKM;ACSL5;LDHA;PRDX5;STAT3;ACSS2;ALDOA;ATIC;BLVRB;GALK1;GCDH;GCLC;GCLM;GSTA1;HK1;KYNU;PARP9;QPRT;ACOT11;ACSF3;AMBP;BDH2;ACOT8;GGCT;MRI1;GPX3;PSAT1;SPR;TKT;UROD;AHCY;BLVRA
GO:0043436	oxoacid metabolic process	http://amigo.geneontology.org/amigo/term/GO:0043436	1048	46	16.4802	2.79123	2.18124e-10	1.11977e-07	16;18;191;226;301;471;593;857;1503;2110;2584;2639;2729;2730;2938;3028;3098;3698;3939;5315;5351;5832;6774;7358;8854;8942;10005;10056;10449;23395;23475;23564;23576;26027;26063;28976;29968;51084;51703;55577;55902;56898;57038;79731;84245;197322	geneontology_Biological_Process	PKM;ACSL5;ANXA1;DDAH2;LDHA;PLOD1;STAT3;ACAA2;ACSS2;ALDOA;ATIC;CAV1;DDAH1;ETFDH;GALK1;GCDH;GCLC;GCLM;GSTA1;HK1;HSD17B10;ITIH2;KYNU;NAGK;NARS2;QPRT;RARS2;ACAD9;ACOT11;ACSF3;ALDH1A2;BCKDHA;BDH2;ACOT8;CRYL1;CTPS1;DECR2;MRI1;ABAT;ALDH18A1;FARSB;LARS2;PSAT1;UGDH;AARS;AHCY
GO:0051604	protein maturation	http://amigo.geneontology.org/amigo/term/GO:0051604	321	24	5.04785	4.7545	2.89192e-10	1.42006e-07	629;710;713;714;715;716;722;727;729;731;732;733;735;2147;2243;3075;3428;5199;5345;7057;7123;7448;51218;84301	geneontology_Biological_Process	C8A;C8G;IFI16;C1QC;C5;C6;C8B;CFP;FGA;SERPING1;THBS1;VTN;C1QB;C4BPA;C9;C1S;CLEC3B;GLRX5;SERPINF2;C1R;CFB;CFH;DDI2;F2
GO:0044403	symbiont process	http://amigo.geneontology.org/amigo/term/GO:0044403	768	38	12.0771	3.14645	3.6216e-10	1.70426e-07	162;213;259;292;293;348;735;857;999;1500;1508;1525;1974;2147;2956;3075;3122;3190;3428;3843;4312;5340;6059;6774;6780;7150;7153;7155;7458;7874;7913;8907;10005;10318;23586;23636;51606;81876	geneontology_Biological_Process	MMP1;APOE;CTNND1;EIF4A2;IFI16;SLC25A5;SLC25A6;STAT3;TNIP1;ABCE1;CAV1;CDH1;DDX58;HNRNPK;NUP62;PLG;RAB1B;USP7;AMBP;AP1B1;C9;STAU1;MSH6;TOP1;TOP2A;ACOT8;DEK;TOP2B;EIF4H;HLA-DRA;IPO5;ALB;AP1M1;ATP6V1H;CFH;CTSB;CXADR;F2
GO:0006082	organic acid metabolic process	http://amigo.geneontology.org/amigo/term/GO:0006082	1068	46	16.7947	2.73896	4.03975e-10	1.825e-07	16;18;191;226;301;471;593;857;1503;2110;2584;2639;2729;2730;2938;3028;3098;3698;3939;5315;5351;5832;6774;7358;8854;8942;10005;10056;10449;23395;23475;23564;23576;26027;26063;28976;29968;51084;51703;55577;55902;56898;57038;79731;84245;197322	geneontology_Biological_Process	PKM;ACSL5;ANXA1;DDAH2;LDHA;PLOD1;STAT3;ACAA2;ACSS2;ALDOA;ATIC;CAV1;DDAH1;ETFDH;GALK1;GCDH;GCLC;GCLM;GSTA1;HK1;HSD17B10;ITIH2;KYNU;NAGK;NARS2;QPRT;RARS2;ACAD9;ACOT11;ACSF3;ALDH1A2;BCKDHA;BDH2;ACOT8;CRYL1;CTPS1;DECR2;MRI1;ABAT;ALDH18A1;FARSB;LARS2;PSAT1;UGDH;AARS;AHCY
GO:0017076	purine nucleotide binding	http://amigo.geneontology.org/amigo/term/GO:0017076	1865	65	29.3279	2.21632	4.48253e-10	1.94714e-07	16;22;191;382;523;1503;1653;1841;1974;2584;2639;2729;2956;3098;3608;3832;3833;3980;4600;4735;5315;5576;5591;5832;6009;6059;6416;7150;7153;7155;7818;8243;8886;9031;9188;10056;10096;10592;22974;23047;23176;23395;23586;24137;26027;28976;50808;51095;51182;51703;55577;55661;55750;55902;57038;57062;57410;64005;65264;79611;79731;79784;81876;115361;197322	geneontology_Molecular_Function	PKM;ACSL5;EIF4A2;ABCB7;ABCE1;ACSS2;ARF6;DDX1;DDX24;DDX58;GALK1;GBP4;GCDH;GCLC;HK1;LIG3;MAP2K4;MX2;NAGK;NARS2;PRKAR2A;RAB1B;RARS2;ACAD9;ACOT11;ACSF3;ACSS3;AGK;RHEB;DDX27;MSH6;TOP1;TOP2A;TRNT1;ACTR3;CTPS1;HSPA14;MYH14;PRKDC;SMC1A;TOP2B;TPX2;AK3;ALDH18A1;ATP6V1A;DAP3;DDX21;FARSB;ILF2;KIF11;KIF4A;KIFC1;LARS2;MYO1G;PDS5B;SCYL1;SEPT2;SEPT8;SMC2;UBE2Z;AARS;AHCY;BAZ1B;DDX18;DTYMK
GO:0030554	adenyl nucleotide binding	http://amigo.geneontology.org/amigo/term/GO:0030554	1522	57	23.9341	2.38154	4.96086e-10	2.07511e-07	16;22;191;523;1503;1653;1841;1974;2584;2639;2729;2956;3098;3608;3832;3833;3980;5315;5576;5591;5832;6059;6416;7150;7153;7155;8243;8886;9031;9188;10056;10096;10592;22974;23047;23395;23586;24137;26027;28976;50808;51095;51182;51703;55577;55661;55750;55902;57038;57062;57410;64005;65264;79611;79731;79784;197322	geneontology_Molecular_Function	PKM;ACSL5;EIF4A2;ABCB7;ABCE1;ACSS2;DDX1;DDX24;DDX58;GALK1;GCDH;GCLC;HK1;LIG3;MAP2K4;NAGK;NARS2;PRKAR2A;RARS2;ACAD9;ACOT11;ACSF3;ACSS3;AGK;DDX27;MSH6;TOP1;TOP2A;TRNT1;ACTR3;CTPS1;HSPA14;MYH14;PRKDC;SMC1A;TOP2B;TPX2;AK3;ALDH18A1;ATP6V1A;DDX21;FARSB;ILF2;KIF11;KIF4A;KIFC1;LARS2;MYO1G;PDS5B;SCYL1;SMC2;UBE2Z;AARS;AHCY;BAZ1B;DDX18;DTYMK
GO:0044419	interspecies interaction between organisms	http://amigo.geneontology.org/amigo/term/GO:0044419	815	39	12.8162	3.04302	5.43332e-10	2.19157e-07	162;213;259;292;293;348;735;857;999;1500;1508;1525;1974;2147;2956;3075;3122;3190;3428;3843;4312;5340;6059;6774;6780;7150;7153;7155;7458;7874;7913;8542;8907;10005;10318;23586;23636;51606;81876	geneontology_Biological_Process	MMP1;APOE;CTNND1;EIF4A2;IFI16;SLC25A5;SLC25A6;STAT3;TNIP1;ABCE1;CAV1;CDH1;DDX58;HNRNPK;NUP62;PLG;RAB1B;USP7;AMBP;AP1B1;APOL1;C9;STAU1;MSH6;TOP1;TOP2A;ACOT8;DEK;TOP2B;EIF4H;HLA-DRA;IPO5;ALB;AP1M1;ATP6V1H;CFH;CTSB;CXADR;F2
GO:0032555	purine ribonucleotide binding	http://amigo.geneontology.org/amigo/term/GO:0032555	1850	64	29.092	2.19992	8.60145e-10	3.34982e-07	16;22;382;523;1503;1653;1841;1974;2584;2639;2729;2956;3098;3608;3832;3833;3980;4600;4735;5315;5576;5591;5832;6009;6059;6416;7150;7153;7155;7818;8243;8886;9031;9188;10056;10096;10592;22974;23047;23176;23395;23586;24137;26027;28976;50808;51095;51182;51703;55577;55661;55750;55902;57038;57062;57410;64005;65264;79611;79731;79784;81876;115361;197322	geneontology_Molecular_Function	PKM;ACSL5;EIF4A2;ABCB7;ABCE1;ACSS2;ARF6;DDX1;DDX24;DDX58;GALK1;GBP4;GCDH;GCLC;HK1;LIG3;MAP2K4;MX2;NAGK;NARS2;PRKAR2A;RAB1B;RARS2;ACAD9;ACOT11;ACSF3;ACSS3;AGK;RHEB;DDX27;MSH6;TOP1;TOP2A;TRNT1;ACTR3;CTPS1;HSPA14;MYH14;PRKDC;SMC1A;TOP2B;TPX2;AK3;ALDH18A1;ATP6V1A;DAP3;DDX21;FARSB;ILF2;KIF11;KIF4A;KIFC1;LARS2;MYO1G;PDS5B;SCYL1;SEPT2;SEPT8;SMC2;UBE2Z;AARS;BAZ1B;DDX18;DTYMK
GO:0030162	regulation of proteolysis	http://amigo.geneontology.org/amigo/term/GO:0030162	722	36	11.3537	3.17076	8.9957e-10	3.38658e-07	197;259;348;629;710;713;714;715;716;722;727;729;731;732;733;735;857;2147;2729;3075;3428;3698;3827;5199;5345;5721;6774;7057;7123;7448;7874;9097;9131;10318;25824;65264	geneontology_Biological_Process	C8A;APOE;C8G;IFI16;PRDX5;STAT3;TNIP1;C1QC;C5;C6;C8B;CAV1;CFP;GCLC;ITIH2;PSME2;SERPING1;THBS1;USP14;USP7;VTN;AHSG;AIFM1;AMBP;C1QB;C4BPA;C9;C1S;CLEC3B;KNG1;SERPINF2;UBE2Z;C1R;CFB;CFH;F2
GO:0032559	adenyl ribonucleotide binding	http://amigo.geneontology.org/amigo/term/GO:0032559	1509	56	23.7296	2.35992	1.02235e-09	3.72466e-07	16;22;523;1503;1653;1841;1974;2584;2639;2729;2956;3098;3608;3832;3833;3980;5315;5576;5591;5832;6059;6416;7150;7153;7155;8243;8886;9031;9188;10056;10096;10592;22974;23047;23395;23586;24137;26027;28976;50808;51095;51182;51703;55577;55661;55750;55902;57038;57062;57410;64005;65264;79611;79731;79784;197322	geneontology_Molecular_Function	PKM;ACSL5;EIF4A2;ABCB7;ABCE1;ACSS2;DDX1;DDX24;DDX58;GALK1;GCDH;GCLC;HK1;LIG3;MAP2K4;NAGK;NARS2;PRKAR2A;RARS2;ACAD9;ACOT11;ACSF3;ACSS3;AGK;DDX27;MSH6;TOP1;TOP2A;TRNT1;ACTR3;CTPS1;HSPA14;MYH14;PRKDC;SMC1A;TOP2B;TPX2;AK3;ALDH18A1;ATP6V1A;DDX21;FARSB;ILF2;KIF11;KIF4A;KIFC1;LARS2;MYO1G;PDS5B;SCYL1;SMC2;UBE2Z;AARS;BAZ1B;DDX18;DTYMK
GO:0002252	immune effector process	http://amigo.geneontology.org/amigo/term/GO:0002252	1141	47	17.9427	2.61945	1.09046e-09	3.84865e-07	178;197;226;301;306;335;629;710;713;714;715;716;722;727;729;731;732;733;735;823;1508;1653;2147;2956;3075;3098;3428;3608;4035;4600;5199;5315;5591;6059;6774;6778;7448;8907;9188;9961;10096;10379;23586;55004;64005;83666;151636	geneontology_Biological_Process	C8A;PKM;ANXA1;C8G;IFI16;IRF9;STAT3;ABCE1;ALDOA;C1QC;C5;C6;C8B;CFP;DDX1;DDX58;DTX3L;HK1;LAMTOR1;LRP1;MX2;PARP9;SERPING1;VTN;AGL;AHSG;ANXA3;APOA1;C1QB;C4BPA;C9;CAPN1;MVP;MSH6;ACTR3;PRKDC;C1S;DDX21;ILF2;MYO1G;STAT6;AP1M1;C1R;CFB;CFH;CTSB;F2
GO:0032553	ribonucleotide binding	http://amigo.geneontology.org/amigo/term/GO:0032553	1865	64	29.3279	2.18222	1.19268e-09	4.08187e-07	16;22;382;523;1503;1653;1841;1974;2584;2639;2729;2956;3098;3608;3832;3833;3980;4600;4735;5315;5576;5591;5832;6009;6059;6416;7150;7153;7155;7818;8243;8886;9031;9188;10056;10096;10592;22974;23047;23176;23395;23586;24137;26027;28976;50808;51095;51182;51703;55577;55661;55750;55902;57038;57062;57410;64005;65264;79611;79731;79784;81876;115361;197322	geneontology_Molecular_Function	PKM;ACSL5;EIF4A2;ABCB7;ABCE1;ACSS2;ARF6;DDX1;DDX24;DDX58;GALK1;GBP4;GCDH;GCLC;HK1;LIG3;MAP2K4;MX2;NAGK;NARS2;PRKAR2A;RAB1B;RARS2;ACAD9;ACOT11;ACSF3;ACSS3;AGK;RHEB;DDX27;MSH6;TOP1;TOP2A;TRNT1;ACTR3;CTPS1;HSPA14;MYH14;PRKDC;SMC1A;TOP2B;TPX2;AK3;ALDH18A1;ATP6V1A;DAP3;DDX21;FARSB;ILF2;KIF11;KIF4A;KIFC1;LARS2;MYO1G;PDS5B;SCYL1;SEPT2;SEPT8;SMC2;UBE2Z;AARS;BAZ1B;DDX18;DTYMK
GO:0050778	positive regulation of immune response	http://amigo.geneontology.org/amigo/term/GO:0050778	706	35	11.1021	3.15255	1.8334e-09	6.09012e-07	301;629;710;713;714;715;716;722;727;729;731;732;733;735;857;1653;2147;2243;2956;3075;3098;3122;3428;5199;5469;5591;6778;7430;7448;9188;10096;10318;23586;64005;83666	geneontology_Biological_Process	C8A;ANXA1;C8G;IFI16;TNIP1;C1QC;C5;C6;C8B;CAV1;CFP;DDX1;DDX58;FGA;HK1;PARP9;SERPING1;VTN;C1QB;C4BPA;C9;MSH6;ACTR3;PRKDC;C1S;DDX21;HLA-DRA;MED1;MYO1G;STAT6;C1R;CFB;CFH;EZR;F2
GO:0016064	immunoglobulin mediated immune response	http://amigo.geneontology.org/amigo/term/GO:0016064	110	14	1.72979	8.09345	1.94725e-09	6.28348e-07	710;713;714;715;716;722;727;729;731;732;733;735;2956;6778	geneontology_Biological_Process	C8A;C8G;C1QC;C5;C6;C8B;SERPING1;C1QB;C4BPA;C9;MSH6;C1S;STAT6;C1R
GO:0019724	B cell mediated immunity	http://amigo.geneontology.org/amigo/term/GO:0019724	112	14	1.76124	7.94892	2.47616e-09	7.76828e-07	710;713;714;715;716;722;727;729;731;732;733;735;2956;6778	geneontology_Biological_Process	C8A;C8G;C1QC;C5;C6;C8B;SERPING1;C1QB;C4BPA;C9;MSH6;C1S;STAT6;C1R
GO:0050776	regulation of immune response	http://amigo.geneontology.org/amigo/term/GO:0050776	909	40	14.2944	2.7983	3.58745e-09	1.09504e-06	259;301;335;348;629;710;713;714;715;716;722;727;729;731;732;733;735;857;1525;1653;2147;2243;2956;3075;3098;3122;3428;5199;5469;5591;6059;6778;7430;7448;9188;10096;10318;23586;64005;83666	geneontology_Biological_Process	C8A;ANXA1;APOE;C8G;IFI16;TNIP1;ABCE1;C1QC;C5;C6;C8B;CAV1;CFP;DDX1;DDX58;FGA;HK1;PARP9;SERPING1;VTN;AMBP;APOA1;C1QB;C4BPA;C9;MSH6;ACTR3;PRKDC;C1S;DDX21;HLA-DRA;MED1;MYO1G;STAT6;C1R;CFB;CFH;CXADR;EZR;F2
GO:0051188	cofactor biosynthetic process	http://amigo.geneontology.org/amigo/term/GO:0051188	280	21	4.40311	4.76935	3.69891e-09	1.09935e-06	226;471;2584;2639;2729;2730;3098;3939;5315;6697;6774;7389;8942;23475;29968;51703;55902;56898;79017;83666;197322	geneontology_Biological_Process	PKM;ACSL5;LDHA;STAT3;ACSS2;ALDOA;ATIC;GALK1;GCDH;GCLC;GCLM;HK1;KYNU;PARP9;QPRT;ACSF3;BDH2;GGCT;PSAT1;SPR;UROD
GO:0030195	negative regulation of blood coagulation	http://amigo.geneontology.org/amigo/term/GO:0030195	51	10	0.801995	12.4689	5.69874e-09	1.6503e-06	18;348;710;2147;2243;3827;5340;5345;7057;7448	geneontology_Biological_Process	APOE;FGA;PLG;SERPING1;THBS1;VTN;ABAT;KNG1;SERPINF2;F2
GO:0055114	oxidation-reduction process	http://amigo.geneontology.org/amigo/term/GO:0055114	968	41	15.2222	2.69344	6.69723e-09	1.89096e-06	178;219;226;335;593;622;644;645;1356;2110;2639;2878;2923;3028;3098;3939;4705;5315;5351;5832;6697;7358;8854;9131;9238;10005;10165;10449;25824;26063;28976;51084;51218;55349;55902;55967;56898;84656;91942;126133;493869	geneontology_Biological_Process	PKM;BDH1;CHDH;GLYR1;LDHA;PLOD1;PRDX5;ACAA2;ACSS2;ALDOA;BLVRB;ETFDH;GCDH;GPX8;HK1;HSD17B10;PDIA3;TBRG4;ACAD9;AGL;AIFM1;ALDH16A1;ALDH1A2;ALDH1B1;APOA1;BCKDHA;BDH2;ACOT8;CRYL1;DECR2;NDUFA10;ALDH18A1;GLRX5;GPX3;NDUFA12;NDUFAF2;SLC25A13;SPR;UGDH;BLVRA;CP
GO:1900047	negative regulation of hemostasis	http://amigo.geneontology.org/amigo/term/GO:1900047	52	10	0.817721	12.2291	6.95856e-09	1.91683e-06	18;348;710;2147;2243;3827;5340;5345;7057;7448	geneontology_Biological_Process	APOE;FGA;PLG;SERPING1;THBS1;VTN;ABAT;KNG1;SERPINF2;F2
GO:0050819	negative regulation of coagulation	http://amigo.geneontology.org/amigo/term/GO:0050819	53	10	0.833446	11.9984	8.45889e-09	2.27464e-06	18;348;710;2147;2243;3827;5340;5345;7057;7448	geneontology_Biological_Process	APOE;FGA;PLG;SERPING1;THBS1;VTN;ABAT;KNG1;SERPINF2;F2
GO:0019835	cytolysis	http://amigo.geneontology.org/amigo/term/GO:0019835	40	9	0.629016	14.3081	9.22646e-09	2.40736e-06	213;727;729;731;732;733;735;2147;8542	geneontology_Biological_Process	C8A;C8G;C5;C6;C8B;APOL1;C9;ALB;F2
GO:0006955	immune response	http://amigo.geneontology.org/amigo/term/GO:0006955	1919	63	30.177	2.08768	9.41805e-09	2.40736e-06	178;191;197;226;259;301;306;335;348;629;710;713;714;715;716;722;727;729;731;732;733;735;823;857;1508;1525;1653;2147;2243;2956;3075;3098;3122;3428;3608;4035;4600;4791;5199;5315;5469;5591;6059;6774;6778;7057;7430;7448;8542;8907;8942;9097;9188;9961;10096;10318;10379;23586;55004;64005;83666;115361;151636	geneontology_Biological_Process	NFKB2;C8A;PKM;ANXA1;APOE;C8G;IFI16;IRF9;STAT3;TNIP1;ABCE1;ALDOA;C1QC;C5;C6;C8B;CAV1;CFP;DDX1;DDX58;DTX3L;FGA;GBP4;HK1;KYNU;LAMTOR1;LRP1;MX2;PARP9;SERPING1;THBS1;USP14;VTN;AGL;AHSG;AMBP;ANXA3;APOA1;APOL1;C1QB;C4BPA;C9;CAPN1;MVP;MSH6;ACTR3;PRKDC;C1S;DDX21;HLA-DRA;ILF2;MED1;MYO1G;STAT6;AHCY;AP1M1;C1R;CFB;CFH;CTSB;CXADR;EZR;F2
GO:0045087	innate immune response	http://amigo.geneontology.org/amigo/term/GO:0045087	827	37	13.0049	2.84508	9.59191e-09	2.40736e-06	301;348;629;710;713;714;715;716;722;727;729;731;732;733;735;857;1653;2243;3075;3122;3428;4600;5199;5469;5591;6059;8542;8942;9097;9188;10096;10318;10379;23586;83666;115361;151636	geneontology_Biological_Process	C8A;ANXA1;APOE;C8G;IFI16;IRF9;TNIP1;ABCE1;C1QC;C5;C6;C8B;CAV1;CFP;DDX1;DDX58;DTX3L;FGA;GBP4;KYNU;MX2;PARP9;SERPING1;USP14;APOL1;C1QB;C4BPA;C9;ACTR3;PRKDC;C1S;DDX21;HLA-DRA;MED1;C1R;CFB;CFH
GO:0035639	purine ribonucleoside triphosphate binding	http://amigo.geneontology.org/amigo/term/GO:0035639	1786	60	28.0856	2.13633	1.0059e-08	2.46971e-06	16;22;382;523;1503;1653;1841;1974;2584;2729;2956;3098;3608;3832;3833;3980;4600;4735;5315;5591;5832;6009;6059;6416;7150;7153;7155;7818;8243;8886;9031;9188;10056;10096;10592;22974;23047;23176;23395;23586;24137;50808;51095;51182;51703;55577;55661;55750;55902;57038;57062;57410;64005;65264;79611;79731;79784;81876;115361;197322	geneontology_Molecular_Function	PKM;ACSL5;EIF4A2;ABCB7;ABCE1;ACSS2;ARF6;DDX1;DDX24;DDX58;GALK1;GBP4;GCLC;HK1;LIG3;MAP2K4;MX2;NAGK;NARS2;RAB1B;RARS2;ACSF3;ACSS3;AGK;RHEB;DDX27;MSH6;TOP1;TOP2A;TRNT1;ACTR3;CTPS1;HSPA14;MYH14;PRKDC;SMC1A;TOP2B;TPX2;AK3;ALDH18A1;ATP6V1A;DAP3;DDX21;FARSB;ILF2;KIF11;KIF4A;KIFC1;LARS2;MYO1G;PDS5B;SCYL1;SEPT2;SEPT8;SMC2;UBE2Z;AARS;BAZ1B;DDX18;DTYMK
hsa05150	Staphylococcus aureus infection	http://www.kegg.jp/kegg-bin/show_pathway?hsa05150+3075+3122+5340+629+713+714+715+716+721+727	56	10	0.880622	11.3556	1.48183e-08	3.48787e-06	3075;3122;5340;629;713;714;715;716;721;727	pathway_KEGG	C4B;C1QC;C5;PLG;C1QB;C1S;HLA-DRA;C1R;CFB;CFH
GO:0043604	amide biosynthetic process	http://amigo.geneontology.org/amigo/term/GO:0043604	766	35	12.0457	2.90561	1.48236e-08	3.48787e-06	16;471;1653;1974;2639;2729;2730;5813;6059;6150;6774;7057;7458;7818;10056;10128;10318;22916;23395;26523;51069;51182;51703;54464;55037;55571;55750;55902;56898;57038;79017;79731;192669;192670;197322	geneontology_Biological_Process	ACSL5;AGO3;EIF4A2;PTCD3;STAT3;TNIP1;ABCE1;ACSS2;AGO1;ATIC;CNOT11;DDX1;GCDH;GCLC;GCLM;MRPL2;NARS2;RARS2;THBS1;ACSF3;AGK;AGO4;BDH2;GGCT;HSPA14;LRPPRC;NCBP2;PURA;DAP3;EIF4H;FARSB;LARS2;MRPL23;XRN1;AARS
GO:0005524	ATP binding	http://amigo.geneontology.org/amigo/term/GO:0005524	1453	52	22.849	2.27581	1.55753e-08	3.58996e-06	16;22;523;1503;1653;1841;1974;2584;2729;2956;3098;3608;3832;3833;3980;5315;5591;5832;6059;6416;7150;7153;7155;8243;8886;9031;9188;10056;10096;10592;22974;23047;23395;23586;24137;50808;51095;51182;51703;55577;55661;55750;55902;57038;57062;57410;64005;65264;79611;79731;79784;197322	geneontology_Molecular_Function	PKM;ACSL5;EIF4A2;ABCB7;ABCE1;ACSS2;DDX1;DDX24;DDX58;GALK1;GCLC;HK1;LIG3;MAP2K4;NAGK;NARS2;RARS2;ACSF3;ACSS3;AGK;DDX27;MSH6;TOP1;TOP2A;TRNT1;ACTR3;CTPS1;HSPA14;MYH14;PRKDC;SMC1A;TOP2B;TPX2;AK3;ALDH18A1;ATP6V1A;DDX21;FARSB;ILF2;KIF11;KIF4A;KIFC1;LARS2;MYO1G;PDS5B;SCYL1;SMC2;UBE2Z;AARS;BAZ1B;DDX18;DTYMK
GO:0032101	regulation of response to external stimulus	http://amigo.geneontology.org/amigo/term/GO:0032101	771	35	12.1243	2.88677	1.74552e-08	3.94278e-06	18;197;301;335;348;629;710;713;714;715;716;722;727;729;731;732;733;735;857;2147;2243;3075;3827;4925;5199;5340;5345;5469;7057;7448;9097;10318;23586;83666;151636	geneontology_Biological_Process	C8A;ANXA1;APOE;C8G;TNIP1;C1QC;C5;C6;C8B;CAV1;CFP;DDX58;DTX3L;FGA;NUCB2;PARP9;PLG;SERPING1;THBS1;USP14;VTN;AHSG;APOA1;C1QB;C4BPA;C9;ABAT;C1S;KNG1;MED1;SERPINF2;C1R;CFB;CFH;F2
GO:0044282	small molecule catabolic process	http://amigo.geneontology.org/amigo/term/GO:0044282	430	25	6.76192	3.69717	2.09754e-08	4.64502e-06	18;191;219;226;348;593;622;2110;2584;2639;3028;3098;5315;8942;10005;10449;23475;23564;23576;26063;30833;51084;55577;56898;197322	geneontology_Biological_Process	PKM;APOE;BDH1;DDAH2;NT5C;ACAA2;ALDOA;DDAH1;ETFDH;GALK1;GCDH;HK1;HSD17B10;KYNU;NAGK;QPRT;ACSF3;ALDH1B1;BCKDHA;BDH2;ACOT8;CRYL1;DECR2;ABAT;AHCY
GO:0050662	coenzyme binding	http://amigo.geneontology.org/amigo/term/GO:0050662	284	20	4.46601	4.47827	2.54574e-08	5.52914e-06	18;191;213;219;2110;2639;2729;3939;5351;6697;7358;8942;9131;26027;28976;51084;55349;56898;83666;84656	geneontology_Molecular_Function	CHDH;GLYR1;LDHA;PLOD1;ETFDH;GCDH;GCLC;KYNU;PARP9;ACAD9;ACOT11;AIFM1;ALDH1B1;BDH2;CRYL1;ABAT;SPR;UGDH;AHCY;ALB
GO:0030193	regulation of blood coagulation	http://amigo.geneontology.org/amigo/term/GO:0030193	76	11	1.19513	9.20402	2.76684e-08	5.89597e-06	18;348;710;857;2147;2243;3827;5340;5345;7057;7448	geneontology_Biological_Process	APOE;CAV1;FGA;PLG;SERPING1;THBS1;VTN;ABAT;KNG1;SERPINF2;F2
GO:0045296	cadherin binding	http://amigo.geneontology.org/amigo/term/GO:0045296	315	21	4.9535	4.23943	2.92681e-08	6.12136e-06	226;301;392;471;822;999;1192;1500;2010;3069;3190;3898;3939;4735;5315;5905;7430;7458;29766;57410;57530	geneontology_Molecular_Function	PKM;ANXA1;CTNND1;LDHA;ALDOA;ATIC;CDH1;CGN;HDLBP;HNRNPK;LAD1;RANGAP1;TMOD3;CAPG;EIF4H;SCYL1;SEPT2;ARHGAP1;CLIC1;EMD;EZR
GO:1900046	regulation of hemostasis	http://amigo.geneontology.org/amigo/term/GO:1900046	77	11	1.21086	9.08449	3.1834e-08	6.53698e-06	18;348;710;857;2147;2243;3827;5340;5345;7057;7448	geneontology_Biological_Process	APOE;CAV1;FGA;PLG;SERPING1;THBS1;VTN;ABAT;KNG1;SERPINF2;F2
GO:0050818	regulation of coagulation	http://amigo.geneontology.org/amigo/term/GO:0050818	79	11	1.24231	8.8545	4.1875e-08	8.35118e-06	18;348;710;857;2147;2243;3827;5340;5345;7057;7448	geneontology_Biological_Process	APOE;CAV1;FGA;PLG;SERPING1;THBS1;VTN;ABAT;KNG1;SERPINF2;F2
GO:0044283	small molecule biosynthetic process	http://amigo.geneontology.org/amigo/term/GO:0044283	724	33	11.3852	2.8985	4.21478e-08	8.35118e-06	18;226;301;335;348;471;622;1503;1854;2584;3098;3939;5315;5351;5832;6697;6774;7086;7358;8854;8942;10005;10165;10449;26027;26063;29968;30833;55902;56898;79611;84245;197322	geneontology_Biological_Process	PKM;ANXA1;APOE;BDH1;LDHA;NT5C;PLOD1;STAT3;ACAA2;ACSS2;ALDOA;ATIC;DUT;GALK1;HK1;KYNU;ACOT11;ACSF3;ACSS3;ALDH1A2;APOA1;BDH2;ACOT8;CTPS1;DECR2;MRI1;ABAT;ALDH18A1;PSAT1;SLC25A13;SPR;TKT;UGDH
hsa05020	Prion diseases	http://www.kegg.jp/kegg-bin/show_pathway?hsa05020+713+714+727+729+731+732+733+735	35	8	0.550389	14.5352	5.50984e-08	1.0729e-05	713;714;727;729;731;732;733;735	pathway_KEGG	C8A;C8G;C1QC;C5;C6;C8B;C1QB;C9
GO:0006959	humoral immune response	http://amigo.geneontology.org/amigo/term/GO:0006959	242	18	3.80555	4.72994	5.64918e-08	1.08139e-05	629;710;713;714;715;716;722;727;729;731;732;733;735;2147;2243;3075;5199;7448	geneontology_Biological_Process	C8A;C8G;C1QC;C5;C6;C8B;CFP;FGA;SERPING1;VTN;C1QB;C4BPA;C9;C1S;C1R;CFB;CFH;F2
GO:0031347	regulation of defense response	http://amigo.geneontology.org/amigo/term/GO:0031347	701	32	11.0235	2.90289	6.6416e-08	1.24496e-05	197;293;301;335;348;629;710;713;714;715;716;722;727;729;731;732;733;735;857;2147;2243;3075;3428;5199;5469;5591;6059;7448;10318;23586;83666;151636	geneontology_Biological_Process	C8A;ANXA1;APOE;C8G;IFI16;SLC25A6;TNIP1;ABCE1;C1QC;C5;C6;C8B;CAV1;CFP;DDX58;DTX3L;FGA;PARP9;SERPING1;VTN;AHSG;APOA1;C1QB;C4BPA;C9;PRKDC;C1S;MED1;C1R;CFB;CFH;F2
GO:0050727	regulation of inflammatory response	http://amigo.geneontology.org/amigo/term/GO:0050727	361	22	5.67687	3.87538	6.72417e-08	1.24496e-05	197;301;335;348;629;710;713;714;715;716;722;727;729;731;732;733;735;2147;3075;5199;7448;10318	geneontology_Biological_Process	C8A;ANXA1;APOE;C8G;TNIP1;C1QC;C5;C6;C8B;CFP;SERPING1;VTN;AHSG;APOA1;C1QB;C4BPA;C9;C1S;C1R;CFB;CFH;F2
GO:0008144	drug binding	http://amigo.geneontology.org/amigo/term/GO:0008144	1707	56	26.8433	2.08619	7.94248e-08	1.44681e-05	16;18;22;213;523;1503;1653;1841;1974;2584;2638;2729;2956;3098;3608;3832;3833;3980;5315;5591;5832;6059;6416;7150;7153;7155;8243;8886;8942;9031;9188;10056;10096;10592;22974;23047;23395;23586;24137;50808;51095;51182;51703;55577;55661;55750;55902;57038;57062;57410;64005;65264;79611;79731;79784;197322	geneontology_Molecular_Function	PKM;ACSL5;EIF4A2;ABCB7;ABCE1;ACSS2;DDX1;DDX24;DDX58;GALK1;GC;GCLC;HK1;KYNU;LIG3;MAP2K4;NAGK;NARS2;RARS2;ACSF3;ACSS3;AGK;DDX27;MSH6;TOP1;TOP2A;TRNT1;ACTR3;CTPS1;HSPA14;MYH14;PRKDC;SMC1A;TOP2B;TPX2;ABAT;AK3;ALDH18A1;ATP6V1A;DDX21;FARSB;ILF2;KIF11;KIF4A;KIFC1;LARS2;MYO1G;PDS5B;SCYL1;SMC2;UBE2Z;AARS;ALB;BAZ1B;DDX18;DTYMK
GO:0016032	viral process	http://amigo.geneontology.org/amigo/term/GO:0016032	707	32	11.1179	2.87825	8.07261e-08	1.44684e-05	162;259;292;293;348;857;1508;1525;1974;2956;3075;3122;3190;3428;3843;4312;6059;6774;6780;7150;7153;7155;7458;7874;7913;8907;10005;10318;23586;23636;51606;81876	geneontology_Biological_Process	MMP1;APOE;EIF4A2;IFI16;SLC25A5;SLC25A6;STAT3;TNIP1;ABCE1;CAV1;DDX58;HNRNPK;NUP62;RAB1B;USP7;AMBP;AP1B1;STAU1;MSH6;TOP1;TOP2A;ACOT8;DEK;TOP2B;EIF4H;HLA-DRA;IPO5;AP1M1;ATP6V1H;CFH;CTSB;CXADR
GO:0002460	adaptive immune response based on somatic recombination of immune receptors built from immunoglobulin superfamily domains	http://amigo.geneontology.org/amigo/term/GO:0002460	248	18	3.8999	4.6155	8.19883e-08	1.44684e-05	301;710;713;714;715;716;722;727;729;731;732;733;735;2956;4791;6774;6778;64005	geneontology_Biological_Process	NFKB2;C8A;ANXA1;C8G;STAT3;C1QC;C5;C6;C8B;SERPING1;C1QB;C4BPA;C9;MSH6;C1S;MYO1G;STAT6;C1R
GO:0080134	regulation of response to stress	http://amigo.geneontology.org/amigo/term/GO:0080134	1361	48	21.4023	2.24275	9.65369e-08	1.67737e-05	18;197;259;293;301;335;348;629;710;713;714;715;716;722;727;729;731;732;733;735;857;2147;2243;3075;3190;3428;3827;5199;5340;5345;5469;5591;6059;6416;7014;7057;7430;7448;7913;9097;9555;10318;10565;23576;23586;27000;83666;151636	geneontology_Biological_Process	C8A;ANXA1;APOE;C8G;IFI16;SLC25A6;TNIP1;ABCE1;C1QC;C5;C6;C8B;CAV1;CFP;DDAH1;DDX58;DTX3L;FGA;HNRNPK;MAP2K4;PARP9;PLG;SERPING1;THBS1;USP14;VTN;AHSG;AMBP;APOA1;ARFGEF1;C1QB;C4BPA;C9;DEK;PRKDC;ABAT;C1S;DNAJC2;H2AFY;KNG1;MED1;SERPINF2;TERF2;C1R;CFB;CFH;EZR;F2
GO:0002253	activation of immune response	http://amigo.geneontology.org/amigo/term/GO:0002253	534	27	8.39736	3.2153	1.00359e-07	1.71736e-05	629;710;713;714;715;716;722;727;729;731;732;733;735;857;2147;2243;3075;3122;3428;5199;5591;7430;7448;10096;10318;23586;64005	geneontology_Biological_Process	C8A;C8G;IFI16;TNIP1;C1QC;C5;C6;C8B;CAV1;CFP;DDX58;FGA;SERPING1;VTN;C1QB;C4BPA;C9;ACTR3;PRKDC;C1S;HLA-DRA;MYO1G;C1R;CFB;CFH;EZR;F2
GO:0006890	retrograde vesicle-mediated transport, Golgi to ER	http://amigo.geneontology.org/amigo/term/GO:0006890	86	11	1.35238	8.13378	1.02852e-07	1.73374e-05	372;3832;8775;10960;22818;22820;24137;26958;57410;81876;84364	geneontology_Biological_Process	COPG1;LMAN2;COPZ1;NAPA;RAB1B;ARCN1;ARFGAP2;KIF11;KIF4A;SCYL1;COPG2
GO:0002576	platelet degranulation	http://amigo.geneontology.org/amigo/term/GO:0002576	127	13	1.99713	6.50936	1.04729e-07	1.73943e-05	197;213;226;335;710;2243;3827;5340;5345;7018;7057;7123;139322	geneontology_Biological_Process	ALDOA;APOOL;FGA;PLG;SERPING1;THBS1;AHSG;APOA1;CLEC3B;KNG1;SERPINF2;TF;ALB
GO:0061041	regulation of wound healing	http://amigo.geneontology.org/amigo/term/GO:0061041	128	13	2.01285	6.4585	1.1495e-07	1.88151e-05	18;301;348;710;857;2147;2243;3827;5340;5345;7057;7448;10565	geneontology_Biological_Process	ANXA1;APOE;CAV1;FGA;PLG;SERPING1;THBS1;VTN;ARFGEF1;ABAT;KNG1;SERPINF2;F2
GO:0043603	cellular amide metabolic process	http://amigo.geneontology.org/amigo/term/GO:0043603	1033	40	16.2443	2.4624	1.19683e-07	1.931e-05	16;348;471;1653;1974;2639;2729;2730;2938;5813;6059;6150;6774;7057;7458;7818;8942;10005;10056;10128;10318;22916;23395;26027;26523;51069;51182;51703;54464;55037;55571;55750;55902;56898;57038;79017;79731;192669;192670;197322	geneontology_Biological_Process	ACSL5;AGO3;APOE;EIF4A2;PTCD3;STAT3;TNIP1;ABCE1;ACSS2;AGO1;ATIC;CNOT11;DDX1;GCDH;GCLC;GCLM;GSTA1;KYNU;MRPL2;NARS2;RARS2;THBS1;ACOT11;ACSF3;AGK;AGO4;BDH2;ACOT8;GGCT;HSPA14;LRPPRC;NCBP2;PURA;DAP3;EIF4H;FARSB;LARS2;MRPL23;XRN1;AARS
GO:0050839	cell adhesion molecule binding	http://amigo.geneontology.org/amigo/term/GO:0050839	478	25	7.51674	3.32591	1.61972e-07	2.54503e-05	226;301;392;471;822;999;1192;1500;1525;2010;2243;3069;3190;3898;3939;4735;5315;5905;7057;7430;7448;7458;29766;57410;57530	geneontology_Molecular_Function	PKM;ANXA1;CTNND1;LDHA;ALDOA;ATIC;CDH1;CGN;FGA;HDLBP;HNRNPK;LAD1;RANGAP1;THBS1;TMOD3;VTN;CAPG;EIF4H;SCYL1;SEPT2;ARHGAP1;CLIC1;CXADR;EMD;EZR
GO:0006520	cellular amino acid metabolic process	http://amigo.geneontology.org/amigo/term/GO:0006520	318	20	5.00068	3.99946	1.63172e-07	2.54503e-05	16;18;191;593;1503;2639;2729;2730;3028;5351;5832;8942;10056;23395;23564;23576;29968;57038;79731;84245	geneontology_Biological_Process	DDAH2;PLOD1;DDAH1;GCDH;GCLC;GCLM;HSD17B10;KYNU;NARS2;RARS2;BCKDHA;CTPS1;MRI1;ABAT;ALDH18A1;FARSB;LARS2;PSAT1;AARS;AHCY
GO:0006952	defense response	http://amigo.geneontology.org/amigo/term/GO:0006952	1518	51	23.8712	2.13647	1.64501e-07	2.54503e-05	191;197;293;301;306;335;348;629;710;713;714;715;716;722;727;729;731;732;733;735;857;1653;2147;2243;3075;3122;3428;3827;4035;4600;5199;5345;5469;5591;6059;6774;7057;7448;8542;8942;9097;9188;10096;10318;10379;23586;23780;25824;83666;115361;151636	geneontology_Biological_Process	C8A;ANXA1;APOE;C8G;IFI16;IRF9;PRDX5;SLC25A6;STAT3;TNIP1;ABCE1;APOL2;C1QC;C5;C6;C8B;CAV1;CFP;DDX1;DDX58;DTX3L;FGA;GBP4;KYNU;LRP1;MX2;PARP9;SERPING1;THBS1;USP14;VTN;AHSG;ANXA3;APOA1;APOL1;C1QB;C4BPA;C9;ACTR3;PRKDC;C1S;DDX21;HLA-DRA;KNG1;MED1;SERPINF2;AHCY;C1R;CFB;CFH;F2
GO:0016491	oxidoreductase activity	http://amigo.geneontology.org/amigo/term/GO:0016491	731	32	11.4953	2.78375	1.72036e-07	2.62564e-05	219;593;622;644;645;1356;2110;2639;2878;2923;2938;3028;3939;4705;5351;5832;6697;7358;8854;9131;25824;26063;28976;51084;51218;55349;55967;56898;84656;91942;126133;493869	geneontology_Molecular_Function	BDH1;CHDH;GLYR1;LDHA;PLOD1;PRDX5;BLVRB;ETFDH;GCDH;GPX8;GSTA1;HSD17B10;PDIA3;ACAD9;AIFM1;ALDH16A1;ALDH1A2;ALDH1B1;BCKDHA;BDH2;CRYL1;DECR2;NDUFA10;ALDH18A1;GLRX5;GPX3;NDUFA12;NDUFAF2;SPR;UGDH;BLVRA;CP
GO:0055086	nucleobase-containing small molecule metabolic process	http://amigo.geneontology.org/amigo/term/GO:0055086	732	32	11.511	2.77995	1.77403e-07	2.65141e-05	191;226;471;523;1503;1841;1854;2584;2639;3098;3939;4705;5238;5315;6774;7086;7358;8760;8942;10005;10165;23475;26027;30833;50808;51703;55577;55902;55967;83666;84245;197322	geneontology_Biological_Process	PKM;ACSL5;LDHA;NT5C;STAT3;ACSS2;ALDOA;ATIC;DUT;GALK1;GCDH;HK1;KYNU;NAGK;PARP9;PGM3;QPRT;ACOT11;ACSF3;ACOT8;CTPS1;MRI1;NDUFA10;AK3;ATP6V1A;NDUFA12;SLC25A13;TKT;UGDH;AHCY;CDS2;DTYMK
GO:0061045	negative regulation of wound healing	http://amigo.geneontology.org/amigo/term/GO:0061045	72	10	1.13223	8.83214	1.78844e-07	2.65141e-05	18;348;710;2147;2243;3827;5340;5345;7057;7448	geneontology_Biological_Process	APOE;FGA;PLG;SERPING1;THBS1;VTN;ABAT;KNG1;SERPINF2;F2
hsa05322	Systemic lupus erythematosus	http://www.kegg.jp/kegg-bin/show_pathway?hsa05322+3122+713+714+715+716+721+727+729+731+732+733+735+9555	133	13	2.09148	6.2157	1.80767e-07	2.65141e-05	3122;713;714;715;716;721;727;729;731;732;733;735;9555	pathway_KEGG	C8A;C4B;C8G;C1QC;C5;C6;C8B;C1QB;C9;C1S;H2AFY;HLA-DRA;C1R
GO:0043043	peptide biosynthetic process	http://amigo.geneontology.org/amigo/term/GO:0043043	636	29	10.0014	2.89961	2.93655e-07	4.25198e-05	16;1653;1974;2729;2730;5813;6059;6150;6774;7057;7458;7818;10056;10128;10318;22916;23395;26523;51069;51182;54464;55037;55571;56898;57038;79017;79731;192669;192670	geneontology_Biological_Process	AGO3;EIF4A2;PTCD3;STAT3;TNIP1;ABCE1;AGO1;CNOT11;DDX1;GCLC;GCLM;MRPL2;NARS2;RARS2;THBS1;AGO4;BDH2;GGCT;HSPA14;LRPPRC;NCBP2;PURA;DAP3;EIF4H;FARSB;LARS2;MRPL23;XRN1;AARS
GO:0003725	double-stranded RNA binding	http://amigo.geneontology.org/amigo/term/GO:0003725	76	10	1.19513	8.36729	3.01241e-07	4.30661e-05	1653;3608;6780;7458;9188;23586;26523;51663;192669;192670	geneontology_Molecular_Function	AGO3;AGO1;DDX1;DDX58;AGO4;STAU1;DDX21;EIF4H;ILF2;ZFR
GO:0006954	inflammatory response	http://amigo.geneontology.org/amigo/term/GO:0006954	717	31	11.2751	2.74942	3.56284e-07	5.02984e-05	191;197;301;335;348;629;710;713;714;715;716;722;727;729;731;732;733;735;2147;3075;3428;3827;4035;5199;5345;6774;7057;7448;10318;23780;25824	geneontology_Biological_Process	C8A;ANXA1;APOE;C8G;IFI16;PRDX5;STAT3;TNIP1;APOL2;C1QC;C5;C6;C8B;CFP;LRP1;SERPING1;THBS1;VTN;AHSG;APOA1;C1QB;C4BPA;C9;C1S;KNG1;SERPINF2;AHCY;C1R;CFB;CFH;F2
GO:0009165	nucleotide biosynthetic process	http://amigo.geneontology.org/amigo/term/GO:0009165	340	20	5.34664	3.74067	4.74977e-07	6.62271e-05	226;471;1503;1841;1854;2584;2639;3098;3939;5315;6774;8760;8942;10165;23475;50808;51703;55902;83666;197322	geneontology_Biological_Process	PKM;ACSL5;LDHA;STAT3;ACSS2;ALDOA;ATIC;DUT;GALK1;GCDH;HK1;KYNU;PARP9;QPRT;ACSF3;CTPS1;AK3;SLC25A13;CDS2;DTYMK
GO:1901293	nucleoside phosphate biosynthetic process	http://amigo.geneontology.org/amigo/term/GO:1901293	343	20	5.39381	3.70795	5.45561e-07	7.5141e-05	226;471;1503;1841;1854;2584;2639;3098;3939;5315;6774;8760;8942;10165;23475;50808;51703;55902;83666;197322	geneontology_Biological_Process	PKM;ACSL5;LDHA;STAT3;ACSS2;ALDOA;ATIC;DUT;GALK1;GCDH;HK1;KYNU;PARP9;QPRT;ACSF3;CTPS1;AK3;SLC25A13;CDS2;DTYMK
GO:0002684	positive regulation of immune system process	http://amigo.geneontology.org/amigo/term/GO:0002684	979	37	15.3952	2.40335	6.78787e-07	9.23641e-05	301;629;710;713;714;715;716;722;727;729;731;732;733;735;857;1653;2147;2243;2956;3075;3098;3122;3428;5199;5469;5591;6774;6778;7057;7430;7448;9188;10096;10318;23586;64005;83666	geneontology_Biological_Process	C8A;ANXA1;C8G;IFI16;STAT3;TNIP1;C1QC;C5;C6;C8B;CAV1;CFP;DDX1;DDX58;FGA;HK1;PARP9;SERPING1;THBS1;VTN;C1QB;C4BPA;C9;MSH6;ACTR3;PRKDC;C1S;DDX21;HLA-DRA;MED1;MYO1G;STAT6;C1R;CFB;CFH;EZR;F2
GO:1903035	negative regulation of response to wounding	http://amigo.geneontology.org/amigo/term/GO:1903035	84	10	1.32093	7.5704	7.80186e-07	0.00010476	18;348;710;2147;2243;3827;5340;5345;7057;7448	geneontology_Biological_Process	APOE;FGA;PLG;SERPING1;THBS1;VTN;ABAT;KNG1;SERPINF2;F2
GO:0016874	ligase activity	http://amigo.geneontology.org/amigo/term/GO:0016874	151	13	2.37454	5.47476	7.88437e-07	0.00010476	16;1503;2729;2730;3980;10056;23395;51703;55902;57038;79611;79731;197322	geneontology_Molecular_Function	ACSL5;ACSS2;GCLC;GCLM;LIG3;NARS2;RARS2;ACSF3;ACSS3;CTPS1;FARSB;LARS2;AARS
GO:1903034	regulation of response to wounding	http://amigo.geneontology.org/amigo/term/GO:1903034	152	13	2.39026	5.43874	8.50214e-07	0.000111655	18;301;348;710;857;2147;2243;3827;5340;5345;7057;7448;10565	geneontology_Biological_Process	ANXA1;APOE;CAV1;FGA;PLG;SERPING1;THBS1;VTN;ARFGEF1;ABAT;KNG1;SERPINF2;F2
GO:0006732	coenzyme metabolic process	http://amigo.geneontology.org/amigo/term/GO:0006732	354	20	5.56679	3.59273	8.9442e-07	0.00011611	226;471;2584;2639;2729;3098;3939;5315;6697;6774;7086;8942;10005;23475;26027;51703;55902;83666;84245;197322	geneontology_Biological_Process	PKM;ACSL5;LDHA;STAT3;ACSS2;ALDOA;ATIC;GALK1;GCDH;GCLC;HK1;KYNU;PARP9;QPRT;ACOT11;ACSF3;ACOT8;MRI1;SPR;TKT
GO:0016054	organic acid catabolic process	http://amigo.geneontology.org/amigo/term/GO:0016054	264	17	4.1515	4.0949	1.01979e-06	0.00012941	18;191;593;2110;2639;3028;8942;10005;10449;23475;23564;23576;26063;51084;55577;56898;197322	geneontology_Biological_Process	DDAH2;ACAA2;DDAH1;ETFDH;GCDH;HSD17B10;KYNU;NAGK;QPRT;ACSF3;BCKDHA;BDH2;ACOT8;CRYL1;DECR2;ABAT;AHCY
GO:0046395	carboxylic acid catabolic process	http://amigo.geneontology.org/amigo/term/GO:0046395	264	17	4.1515	4.0949	1.01979e-06	0.00012941	18;191;593;2110;2639;3028;8942;10005;10449;23475;23564;23576;26063;51084;55577;56898;197322	geneontology_Biological_Process	DDAH2;ACAA2;DDAH1;ETFDH;GCDH;HSD17B10;KYNU;NAGK;QPRT;ACSF3;BCKDHA;BDH2;ACOT8;CRYL1;DECR2;ABAT;AHCY
GO:0004857	enzyme inhibitor activity	http://amigo.geneontology.org/amigo/term/GO:0004857	360	20	5.66114	3.53286	1.16112e-06	0.000145707	197;259;301;306;307;335;710;727;3698;3827;3843;5345;5576;6059;9097;9555;25824;65264;83666;151636	geneontology_Molecular_Function	ANXA1;PRDX5;ABCE1;ANXA4;C5;DTX3L;ITIH2;PARP9;PRKAR2A;SERPING1;USP14;AHSG;AMBP;ANXA3;APOA1;H2AFY;IPO5;KNG1;SERPINF2;UBE2Z
GO:0002443	leukocyte mediated immunity	http://amigo.geneontology.org/amigo/term/GO:0002443	760	31	11.9513	2.59386	1.2323e-06	0.000151279	178;197;226;306;710;713;714;715;716;722;727;729;731;732;733;735;823;1508;1653;2147;2956;3608;5199;5315;6778;8907;9188;9961;23586;55004;64005	geneontology_Biological_Process	C8A;PKM;C8G;ALDOA;C1QC;C5;C6;C8B;CFP;DDX1;DDX58;LAMTOR1;SERPING1;AGL;AHSG;ANXA3;C1QB;C4BPA;C9;CAPN1;MVP;MSH6;C1S;DDX21;ILF2;MYO1G;STAT6;AP1M1;C1R;CTSB;F2
GO:0017144	drug metabolic process	http://amigo.geneontology.org/amigo/term/GO:0017144	760	31	11.9513	2.59386	1.2323e-06	0.000151279	18;219;226;523;622;857;2584;2878;3098;3939;4705;5315;5832;6697;6774;8854;8942;10005;10165;23475;23564;23576;25824;29968;50808;55577;55902;55967;56898;79611;84245	geneontology_Biological_Process	PKM;BDH1;DDAH2;LDHA;PRDX5;STAT3;ACSS2;ALDOA;CAV1;DDAH1;GALK1;HK1;KYNU;NAGK;QPRT;ACSS3;ALDH1A2;ALDH1B1;BDH2;ACOT8;MRI1;NDUFA10;ABAT;AK3;ALDH18A1;ATP6V1A;GPX3;NDUFA12;PSAT1;SLC25A13;SPR
GO:0002682	regulation of immune system process	http://amigo.geneontology.org/amigo/term/GO:0002682	1400	46	22.0156	2.08943	1.37321e-06	0.000166764	259;301;335;348;629;710;713;714;715;716;722;727;729;731;732;733;735;857;1525;1653;2147;2243;2956;3075;3098;3122;3428;5199;5469;5591;6059;6774;6778;7057;7430;7448;9188;10096;10318;23586;26523;64005;83666;151636;192669;192670	geneontology_Biological_Process	C8A;AGO3;ANXA1;APOE;C8G;IFI16;STAT3;TNIP1;ABCE1;AGO1;C1QC;C5;C6;C8B;CAV1;CFP;DDX1;DDX58;DTX3L;FGA;HK1;PARP9;SERPING1;THBS1;VTN;AGO4;AMBP;APOA1;C1QB;C4BPA;C9;MSH6;ACTR3;PRKDC;C1S;DDX21;HLA-DRA;MED1;MYO1G;STAT6;C1R;CFB;CFH;CXADR;EZR;F2
GO:0046394	carboxylic acid biosynthetic process	http://amigo.geneontology.org/amigo/term/GO:0046394	400	21	6.29016	3.33855	1.54721e-06	0.000185896	18;226;301;471;2584;3098;3939;5315;5351;5832;6774;7358;8854;8942;10005;26027;26063;29968;55902;84245;197322	geneontology_Biological_Process	PKM;ANXA1;LDHA;PLOD1;STAT3;ACSS2;ALDOA;ATIC;GALK1;HK1;KYNU;ACOT11;ACSF3;ALDH1A2;ACOT8;DECR2;MRI1;ABAT;ALDH18A1;PSAT1;UGDH
GO:0016053	organic acid biosynthetic process	http://amigo.geneontology.org/amigo/term/GO:0016053	401	21	6.30588	3.33022	1.60989e-06	0.000191391	18;226;301;471;2584;3098;3939;5315;5351;5832;6774;7358;8854;8942;10005;26027;26063;29968;55902;84245;197322	geneontology_Biological_Process	PKM;ANXA1;LDHA;PLOD1;STAT3;ACSS2;ALDOA;ATIC;GALK1;HK1;KYNU;ACOT11;ACSF3;ALDH1A2;ACOT8;DECR2;MRI1;ABAT;ALDH18A1;PSAT1;UGDH
GO:0009108	coenzyme biosynthetic process	http://amigo.geneontology.org/amigo/term/GO:0009108	218	15	3.42814	4.37555	1.96445e-06	0.000231109	226;471;2584;2639;3098;3939;5315;6697;6774;8942;23475;51703;55902;83666;197322	geneontology_Biological_Process	PKM;ACSL5;LDHA;STAT3;ACSS2;ALDOA;ATIC;GALK1;GCDH;HK1;KYNU;PARP9;QPRT;ACSF3;SPR
GO:0006518	peptide metabolic process	http://amigo.geneontology.org/amigo/term/GO:0006518	780	31	12.2658	2.52735	2.11667e-06	0.00024645	16;348;1653;1974;2729;2730;2938;5813;6059;6150;6774;7057;7458;7818;10056;10128;10318;22916;23395;26523;51069;51182;54464;55037;55571;56898;57038;79017;79731;192669;192670	geneontology_Biological_Process	AGO3;APOE;EIF4A2;PTCD3;STAT3;TNIP1;ABCE1;AGO1;CNOT11;DDX1;GCLC;GCLM;GSTA1;MRPL2;NARS2;RARS2;THBS1;AGO4;BDH2;GGCT;HSPA14;LRPPRC;NCBP2;PURA;DAP3;EIF4H;FARSB;LARS2;MRPL23;XRN1;AARS
GO:0007005	mitochondrion organization	http://amigo.geneontology.org/amigo/term/GO:0007005	515	24	8.09858	2.96348	2.24326e-06	0.000258524	292;293;1525;2729;2730;3028;3980;3998;4600;4705;6742;6774;10449;10953;23277;28976;55750;55967;64756;79017;79784;91942;131118;139322	geneontology_Biological_Process	SLC25A5;SLC25A6;STAT3;ACAA2;APOOL;GCLC;GCLM;HSD17B10;LIG3;LMAN1;MX2;ACAD9;AGK;ATPAF1;SSBP1;DNAJC19;GGCT;MYH14;NDUFA10;CLUH;NDUFA12;NDUFAF2;TOMM34;CXADR
GO:0016192	vesicle-mediated transport	http://amigo.geneontology.org/amigo/term/GO:0016192	1942	57	30.5387	1.86648	2.29467e-06	0.000261778	162;178;197;213;226;259;301;306;335;348;372;382;392;710;722;823;857;1508;2147;2243;3190;3608;3827;3832;3998;4035;5199;5315;5340;5345;7018;7057;7123;7430;7448;8027;8542;8775;8907;9961;10096;10466;10565;10960;22818;22820;23176;24137;26958;51606;55004;57410;64005;81876;84364;139322;151636	geneontology_Biological_Process	COPG1;PKM;ANXA1;APOE;LMAN2;ALDOA;APOOL;ARF6;CAV1;CFP;COPZ1;DTX3L;FGA;HNRNPK;LAMTOR1;LMAN1;LRP1;NAPA;PLG;RAB1B;SERPING1;THBS1;VTN;AGL;AHSG;AMBP;ANXA3;AP1B1;APOA1;APOL1;ARCN1;ARFGAP2;ARFGEF1;C4BPA;CAPN1;MVP;ACTR3;CLEC3B;ILF2;KIF11;KIF4A;KNG1;MYO1G;SCYL1;SEPT8;SERPINF2;STAM;TF;ALB;AP1M1;ARHGAP1;ATP6V1H;COG5;COPG2;CTSB;EZR;F2
GO:0042730	fibrinolysis	http://amigo.geneontology.org/amigo/term/GO:0042730	27	6	0.424586	14.1314	3.21319e-06	0.000360511	710;2147;2243;5340;5345;7057	geneontology_Biological_Process	FGA;PLG;SERPING1;THBS1;SERPINF2;F2
GO:0043086	negative regulation of catalytic activity	http://amigo.geneontology.org/amigo/term/GO:0043086	756	30	11.8884	2.52347	3.22398e-06	0.000360511	197;259;301;306;307;335;348;710;727;857;1974;3428;3698;3827;3843;5345;5576;6059;7014;7057;7448;9097;9555;9961;10565;23636;25824;65264;83666;151636	geneontology_Biological_Process	ANXA1;APOE;EIF4A2;IFI16;PRDX5;ABCE1;ANXA4;C5;CAV1;DTX3L;ITIH2;NUP62;PARP9;PRKAR2A;SERPING1;THBS1;USP14;VTN;AHSG;AMBP;ANXA3;APOA1;ARFGEF1;MVP;H2AFY;IPO5;KNG1;SERPINF2;TERF2;UBE2Z
GO:0051287	NAD binding	http://amigo.geneontology.org/amigo/term/GO:0051287	58	8	0.912073	8.77123	3.28134e-06	0.000363328	191;219;3939;7358;51084;56898;83666;84656	geneontology_Molecular_Function	GLYR1;LDHA;PARP9;ALDH1B1;BDH2;CRYL1;UGDH;AHCY
GO:0048037	cofactor binding	http://amigo.geneontology.org/amigo/term/GO:0048037	492	23	7.7369	2.97277	3.49056e-06	0.000379842	18;191;213;219;259;2110;2639;2729;3939;5351;6697;7086;7358;8942;9131;26027;28976;51084;51218;55349;56898;83666;84656	geneontology_Molecular_Function	CHDH;GLYR1;LDHA;PLOD1;ETFDH;GCDH;GCLC;KYNU;PARP9;ACAD9;ACOT11;AIFM1;ALDH1B1;AMBP;BDH2;CRYL1;ABAT;GLRX5;SPR;TKT;UGDH;AHCY;ALB
GO:0017111	nucleoside-triphosphatase activity	http://amigo.geneontology.org/amigo/term/GO:0017111	840	32	13.2093	2.42253	3.49775e-06	0.000379842	22;301;382;397;523;1653;1974;2956;3832;3833;4600;4735;6009;6059;7153;7155;8886;9188;9296;23176;23586;24137;51182;51606;55661;57062;57530;64005;79784;81876;89953;115361	geneontology_Molecular_Function	ANXA1;EIF4A2;ABCB7;ABCE1;ARF6;CGN;DDX1;DDX24;DDX58;GBP4;KLC4;MX2;RAB1B;ARHGDIB;RHEB;DDX27;MSH6;TOP2A;HSPA14;MYH14;TOP2B;ATP6V1A;ATP6V1F;DDX21;KIF11;KIF4A;KIFC1;MYO1G;SEPT2;SEPT8;ATP6V1H;DDX18
GO:0006508	proteolysis	http://amigo.geneontology.org/amigo/term/GO:0006508	1731	52	27.2207	1.91031	3.63066e-06	0.000390521	197;259;348;629;710;713;714;715;716;722;727;729;731;732;733;735;823;826;839;857;1508;2147;2243;2729;2923;3075;3428;3698;3827;4312;5199;5340;5345;5721;6774;7057;7123;7448;7874;8027;8295;8697;9097;9131;10318;10617;23192;23586;25824;65264;84301;151636	geneontology_Biological_Process	C8A;MMP1;APOE;C8G;IFI16;PRDX5;STAT3;TNIP1;C1QC;C5;C6;C8B;CASP6;CAV1;CFP;DDX58;DTX3L;FGA;GCLC;ITIH2;PDIA3;PLG;PSME2;SERPING1;STAMBP;THBS1;USP14;USP7;VTN;AHSG;AIFM1;AMBP;C1QB;C4BPA;C9;CAPN1;CAPNS1;ATG4B;C1S;CLEC3B;KNG1;SERPINF2;STAM;TRRAP;UBE2Z;C1R;CDC23;CFB;CFH;CTSB;DDI2;F2
GO:0009117	nucleotide metabolic process	http://amigo.geneontology.org/amigo/term/GO:0009117	647	27	10.1743	2.65374	4.11471e-06	0.000438411	226;471;523;1503;1841;1854;2584;2639;3098;3939;4705;5315;6774;7086;8760;8942;10005;10165;23475;26027;30833;50808;51703;55902;55967;83666;197322	geneontology_Biological_Process	PKM;ACSL5;LDHA;NT5C;STAT3;ACSS2;ALDOA;ATIC;DUT;GALK1;GCDH;HK1;KYNU;PARP9;QPRT;ACOT11;ACSF3;ACOT8;CTPS1;NDUFA10;AK3;ATP6V1A;NDUFA12;SLC25A13;TKT;CDS2;DTYMK
GO:0016462	pyrophosphatase activity	http://amigo.geneontology.org/amigo/term/GO:0016462	891	33	14.0113	2.35524	4.43053e-06	0.000467649	22;301;382;397;523;1653;1854;1974;2956;3832;3833;4600;4735;6009;6059;7153;7155;8886;9188;9296;23176;23586;24137;51182;51606;55661;57062;57530;64005;79784;81876;89953;115361	geneontology_Molecular_Function	ANXA1;EIF4A2;ABCB7;ABCE1;ARF6;CGN;DDX1;DDX24;DDX58;DUT;GBP4;KLC4;MX2;RAB1B;ARHGDIB;RHEB;DDX27;MSH6;TOP2A;HSPA14;MYH14;TOP2B;ATP6V1A;ATP6V1F;DDX21;KIF11;KIF4A;KIFC1;MYO1G;SEPT2;SEPT8;ATP6V1H;DDX18
GO:0016817	hydrolase activity, acting on acid anhydrides	http://amigo.geneontology.org/amigo/term/GO:0016817	893	33	14.0428	2.34996	4.64524e-06	0.000481315	22;301;382;397;523;1653;1854;1974;2956;3832;3833;4600;4735;6009;6059;7153;7155;8886;9188;9296;23176;23586;24137;51182;51606;55661;57062;57530;64005;79784;81876;89953;115361	geneontology_Molecular_Function	ANXA1;EIF4A2;ABCB7;ABCE1;ARF6;CGN;DDX1;DDX24;DDX58;DUT;GBP4;KLC4;MX2;RAB1B;ARHGDIB;RHEB;DDX27;MSH6;TOP2A;HSPA14;MYH14;TOP2B;ATP6V1A;ATP6V1F;DDX21;KIF11;KIF4A;KIFC1;MYO1G;SEPT2;SEPT8;ATP6V1H;DDX18
GO:0016818	hydrolase activity, acting on acid anhydrides, in phosphorus-containing anhydrides	http://amigo.geneontology.org/amigo/term/GO:0016818	893	33	14.0428	2.34996	4.64524e-06	0.000481315	22;301;382;397;523;1653;1854;1974;2956;3832;3833;4600;4735;6009;6059;7153;7155;8886;9188;9296;23176;23586;24137;51182;51606;55661;57062;57530;64005;79784;81876;89953;115361	geneontology_Molecular_Function	ANXA1;EIF4A2;ABCB7;ABCE1;ARF6;CGN;DDX1;DDX24;DDX58;DUT;GBP4;KLC4;MX2;RAB1B;ARHGDIB;RHEB;DDX27;MSH6;TOP2A;HSPA14;MYH14;TOP2B;ATP6V1A;ATP6V1F;DDX21;KIF11;KIF4A;KIFC1;MYO1G;SEPT2;SEPT8;ATP6V1H;DDX18
GO:0006753	nucleoside phosphate metabolic process	http://amigo.geneontology.org/amigo/term/GO:0006753	653	27	10.2687	2.62935	4.87703e-06	0.000500738	226;471;523;1503;1841;1854;2584;2639;3098;3939;4705;5315;6774;7086;8760;8942;10005;10165;23475;26027;30833;50808;51703;55902;55967;83666;197322	geneontology_Biological_Process	PKM;ACSL5;LDHA;NT5C;STAT3;ACSS2;ALDOA;ATIC;DUT;GALK1;GCDH;HK1;KYNU;PARP9;QPRT;ACOT11;ACSF3;ACOT8;CTPS1;NDUFA10;AK3;ATP6V1A;NDUFA12;SLC25A13;TKT;CDS2;DTYMK
GO:0015031	protein transport	http://amigo.geneontology.org/amigo/term/GO:0015031	1942	56	30.5387	1.83374	4.93459e-06	0.000502083	18;162;292;293;301;307;335;348;372;382;392;523;727;999;1434;2010;2243;3098;3843;3998;4035;4600;4678;5469;5813;5905;6059;6774;7014;7018;7430;8027;8775;8907;9296;9961;10005;10466;10565;10953;10960;22818;22820;22916;23192;23586;23636;26063;26958;51606;55750;81876;84364;91942;131118;151636	geneontology_Biological_Process	COPG1;ANXA1;APOE;LMAN2;SLC25A5;SLC25A6;STAT3;ABCE1;ANXA4;ARF6;C5;CDH1;COPZ1;DDX58;DTX3L;FGA;HK1;LMAN1;LRP1;MX2;NAPA;NUP62;RAB1B;RANGAP1;AGK;AP1B1;APOA1;ARCN1;ARFGAP2;ARFGEF1;CSE1L;MVP;NASP;ACOT8;DECR2;DNAJC19;NCBP2;PURA;ABAT;ATG4B;ATP6V1A;ATP6V1F;IPO5;MED1;NDUFAF2;STAM;TERF2;TF;TOMM34;AP1M1;ARHGAP1;ATP6V1H;COG5;COPG2;EMD;EZR
GO:0032269	negative regulation of cellular protein metabolic process	http://amigo.geneontology.org/amigo/term/GO:0032269	982	35	15.4423	2.2665	5.18403e-06	0.000522754	197;259;348;710;722;727;857;1786;2147;2729;3428;3698;3827;3843;5345;5576;5591;5813;6774;7057;7430;7448;7874;9097;9555;9961;10318;23636;25824;26523;54464;65264;151636;192669;192670	geneontology_Biological_Process	AGO3;APOE;IFI16;PRDX5;STAT3;TNIP1;AGO1;C5;CAV1;DTX3L;GCLC;ITIH2;NUP62;PRKAR2A;SERPING1;THBS1;USP14;USP7;VTN;AGO4;AHSG;AMBP;C4BPA;MVP;PRKDC;PURA;H2AFY;IPO5;KNG1;SERPINF2;UBE2Z;XRN1;DNMT1;EZR;F2
GO:0002449	lymphocyte mediated immunity	http://amigo.geneontology.org/amigo/term/GO:0002449	238	15	3.74264	4.00786	5.77633e-06	0.000577326	710;713;714;715;716;722;727;729;731;732;733;735;2956;6778;64005	geneontology_Biological_Process	C8A;C8G;C1QC;C5;C6;C8B;SERPING1;C1QB;C4BPA;C9;MSH6;C1S;MYO1G;STAT6;C1R
GO:0051248	negative regulation of protein metabolic process	http://amigo.geneontology.org/amigo/term/GO:0051248	1043	36	16.4016	2.19491	7.66568e-06	0.00075944	197;259;348;710;722;727;857;1786;2147;2729;3428;3698;3827;3843;5345;5576;5591;5813;6774;7057;7430;7448;7874;9097;9555;9961;10005;10318;23636;25824;26523;54464;65264;151636;192669;192670	geneontology_Biological_Process	AGO3;APOE;IFI16;PRDX5;STAT3;TNIP1;AGO1;C5;CAV1;DTX3L;GCLC;ITIH2;NUP62;PRKAR2A;SERPING1;THBS1;USP14;USP7;VTN;AGO4;AHSG;AMBP;C4BPA;MVP;ACOT8;PRKDC;PURA;H2AFY;IPO5;KNG1;SERPINF2;UBE2Z;XRN1;DNMT1;EZR;F2
GO:0015833	peptide transport	http://amigo.geneontology.org/amigo/term/GO:0015833	1977	56	31.0891	1.80127	8.41917e-06	0.000826836	18;162;292;293;301;307;335;348;372;382;392;523;727;999;1434;2010;2243;3098;3843;3998;4035;4600;4678;5469;5813;5905;6059;6774;7014;7018;7430;8027;8775;8907;9296;9961;10005;10466;10565;10953;10960;22818;22820;22916;23192;23586;23636;26063;26958;51606;55750;81876;84364;91942;131118;151636	geneontology_Biological_Process	COPG1;ANXA1;APOE;LMAN2;SLC25A5;SLC25A6;STAT3;ABCE1;ANXA4;ARF6;C5;CDH1;COPZ1;DDX58;DTX3L;FGA;HK1;LMAN1;LRP1;MX2;NAPA;NUP62;RAB1B;RANGAP1;AGK;AP1B1;APOA1;ARCN1;ARFGAP2;ARFGEF1;CSE1L;MVP;NASP;ACOT8;DECR2;DNAJC19;NCBP2;PURA;ABAT;ATG4B;ATP6V1A;ATP6V1F;IPO5;MED1;NDUFAF2;STAM;TERF2;TF;TOMM34;AP1M1;ARHGAP1;ATP6V1H;COG5;COPG2;EMD;EZR
GO:0046700	heterocycle catabolic process	http://amigo.geneontology.org/amigo/term/GO:0046700	599	25	9.41951	2.65407	9.48341e-06	0.000923324	191;226;259;644;645;1854;2584;3098;3939;5315;6774;8942;9131;9238;10128;22916;23475;23589;23644;26523;30833;54464;55571;192669;192670	geneontology_Biological_Process	PKM;AGO3;LDHA;NT5C;STAT3;AGO1;ALDOA;BLVRB;CNOT11;DUT;GALK1;HK1;KYNU;QPRT;TBRG4;AGO4;AIFM1;AMBP;CARHSP1;LRPPRC;NCBP2;EDC4;XRN1;AHCY;BLVRA
GO:0042802	identical protein binding	http://amigo.geneontology.org/amigo/term/GO:0042802	1696	50	26.6703	1.87475	9.74199e-06	0.000933896	18;191;213;226;259;301;307;335;348;471;713;716;839;857;999;1503;2923;2956;3098;3190;3939;5315;5345;5351;5721;5832;6277;6774;6778;7014;7057;7086;7153;7430;7448;8726;8942;9188;9667;9961;10165;10318;23475;23586;51084;58490;79017;84245;84301;115361	geneontology_Molecular_Function	PKM;ANXA1;APOE;LDHA;PLOD1;STAT3;TNIP1;ALDOA;ANXA4;ATIC;CASP6;CAV1;CDH1;DDX58;GBP4;HK1;HNRNPK;KYNU;PDIA3;PSME2;QPRT;THBS1;VTN;AMBP;APOA1;C1QB;MVP;SAFB2;MSH6;TOP2A;CRYL1;CTPS1;GGCT;MRI1;ABAT;ALDH18A1;C1S;DDX21;RPRD1B;S100A6;SERPINF2;SLC25A13;STAT6;TERF2;TKT;AHCY;ALB;DDI2;EED;EZR
GO:0044270	cellular nitrogen compound catabolic process	http://amigo.geneontology.org/amigo/term/GO:0044270	600	25	9.43524	2.64964	9.75737e-06	0.000933896	191;226;259;644;645;1854;2584;3098;3939;5315;6774;8942;9131;9238;10128;22916;23475;23589;23644;26523;30833;54464;55571;192669;192670	geneontology_Biological_Process	PKM;AGO3;LDHA;NT5C;STAT3;AGO1;ALDOA;BLVRB;CNOT11;DUT;GALK1;HK1;KYNU;QPRT;TBRG4;AGO4;AIFM1;AMBP;CARHSP1;LRPPRC;NCBP2;EDC4;XRN1;AHCY;BLVRA
GO:0072525	pyridine-containing compound biosynthetic process	http://amigo.geneontology.org/amigo/term/GO:0072525	111	10	1.74552	5.72895	1.00354e-05	0.000952436	226;2584;3098;3939;5315;6774;8942;23475;29968;83666	geneontology_Biological_Process	PKM;LDHA;STAT3;ALDOA;GALK1;HK1;KYNU;PARP9;QPRT;PSAT1
GO:0002250	adaptive immune response	http://amigo.geneontology.org/amigo/term/GO:0002250	382	19	6.0071	3.16292	1.06355e-05	0.00100098	301;710;713;714;715;716;722;727;729;731;732;733;735;2243;2956;4791;6774;6778;64005	geneontology_Biological_Process	NFKB2;C8A;ANXA1;C8G;STAT3;C1QC;C5;C6;C8B;FGA;SERPING1;C1QB;C4BPA;C9;MSH6;C1S;MYO1G;STAT6;C1R
GO:1901361	organic cyclic compound catabolic process	http://amigo.geneontology.org/amigo/term/GO:1901361	645	26	10.1429	2.56337	1.15131e-05	0.00107462	191;226;259;348;644;645;1854;2584;3098;3939;5315;6774;8942;9131;9238;10128;22916;23475;23589;23644;26523;30833;54464;55571;192669;192670	geneontology_Biological_Process	PKM;AGO3;APOE;LDHA;NT5C;STAT3;AGO1;ALDOA;BLVRB;CNOT11;DUT;GALK1;HK1;KYNU;QPRT;TBRG4;AGO4;AIFM1;AMBP;CARHSP1;LRPPRC;NCBP2;EDC4;XRN1;AHCY;BLVRA
GO:0051918	negative regulation of fibrinolysis	http://amigo.geneontology.org/amigo/term/GO:0051918	10	4	0.157254	25.4366	1.16657e-05	0.00107994	2147;5340;5345;7057	geneontology_Biological_Process	PLG;THBS1;SERPINF2;F2
GO:0006412	translation	http://amigo.geneontology.org/amigo/term/GO:0006412	613	25	9.63967	2.59345	1.40377e-05	0.00128712	16;1653;1974;5813;6059;6150;6774;7057;7458;7818;10056;10128;10318;22916;23395;26523;51069;51182;54464;55037;55571;57038;79731;192669;192670	geneontology_Biological_Process	AGO3;EIF4A2;PTCD3;STAT3;TNIP1;ABCE1;AGO1;CNOT11;DDX1;MRPL2;NARS2;RARS2;THBS1;AGO4;HSPA14;LRPPRC;NCBP2;PURA;DAP3;EIF4H;FARSB;LARS2;MRPL23;XRN1;AARS
GO:0090303	positive regulation of wound healing	http://amigo.geneontology.org/amigo/term/GO:0090303	51	7	0.801995	8.72823	1.41316e-05	0.00128712	301;2147;5340;5345;7057;7448;10565	geneontology_Biological_Process	ANXA1;PLG;THBS1;VTN;ARFGEF1;SERPINF2;F2
GO:0032787	monocarboxylic acid metabolic process	http://amigo.geneontology.org/amigo/term/GO:0032787	575	24	9.0421	2.65425	1.43762e-05	0.00129892	18;226;301;857;2110;2584;2639;2938;3098;3939;5315;6774;8854;8942;10005;10449;26027;26063;28976;51084;51703;55902;56898;197322	geneontology_Biological_Process	PKM;ACSL5;ANXA1;LDHA;STAT3;ACAA2;ACSS2;ALDOA;CAV1;ETFDH;GALK1;GCDH;GSTA1;HK1;KYNU;ACAD9;ACOT11;ACSF3;ALDH1A2;BDH2;ACOT8;CRYL1;DECR2;ABAT
hsa05133	Pertussis	http://www.kegg.jp/kegg-bin/show_pathway?hsa05133+710+713+714+715+716+721+722+727	76	8	1.19513	6.69383	2.52845e-05	0.00226637	710;713;714;715;716;721;722;727	pathway_KEGG	C4B;C1QC;C5;SERPING1;C1QB;C4BPA;C1S;C1R
GO:0030234	enzyme regulator activity	http://amigo.geneontology.org/amigo/term/GO:0030234	1017	34	15.9927	2.12597	2.70435e-05	0.00240495	197;259;301;306;307;335;348;392;397;710;727;857;2147;2730;2962;3698;3827;3843;5345;5576;5721;5905;6059;9097;9555;10565;25824;27000;51606;65264;83666;84364;131118;151636	geneontology_Molecular_Function	ANXA1;APOE;PRDX5;ABCE1;ANXA4;C5;CAV1;DTX3L;GCLM;ITIH2;PARP9;PRKAR2A;PSME2;RANGAP1;SERPING1;USP14;AHSG;AMBP;ANXA3;APOA1;ARFGAP2;ARFGEF1;ARHGDIB;DNAJC19;GTF2F1;DNAJC2;H2AFY;IPO5;KNG1;SERPINF2;UBE2Z;ARHGAP1;ATP6V1H;F2
GO:0072524	pyridine-containing compound metabolic process	http://amigo.geneontology.org/amigo/term/GO:0072524	153	11	2.40599	4.57193	3.09686e-05	0.0027325	226;2584;3098;3939;5315;6774;7086;8942;23475;29968;83666	geneontology_Biological_Process	PKM;LDHA;STAT3;ALDOA;GALK1;HK1;KYNU;PARP9;QPRT;PSAT1;TKT
GO:1903036	positive regulation of response to wounding	http://amigo.geneontology.org/amigo/term/GO:1903036	58	7	0.912073	7.67482	3.34155e-05	0.00292554	301;2147;5340;5345;7057;7448;10565	geneontology_Biological_Process	ANXA1;PLG;THBS1;VTN;ARFGEF1;SERPINF2;F2
GO:0007059	chromosome segregation	http://amigo.geneontology.org/amigo/term/GO:0007059	312	16	4.90632	3.2611	3.69629e-05	0.00320046	292;3833;7150;7153;7155;8243;8697;9555;10096;10592;10735;23047;23636;24137;79892;192670	geneontology_Biological_Process	MCMBP;SLC25A5;NUP62;AGO4;STAG2;TOP1;TOP2A;ACTR3;SMC1A;TOP2B;H2AFY;KIF4A;KIFC1;PDS5B;SMC2;CDC23
GO:0035279	mRNA cleavage involved in gene silencing by miRNA	http://amigo.geneontology.org/amigo/term/GO:0035279	5	3	0.078627	38.1548	3.7584e-05	0.00320046	26523;192669;192670	geneontology_Biological_Process	AGO3;AGO1;AGO4
GO:0098795	mRNA cleavage involved in gene silencing	http://amigo.geneontology.org/amigo/term/GO:0098795	5	3	0.078627	38.1548	3.7584e-05	0.00320046	26523;192669;192670	geneontology_Biological_Process	AGO3;AGO1;AGO4
GO:0000819	sister chromatid segregation	http://amigo.geneontology.org/amigo/term/GO:0000819	185	12	2.9092	4.12485	3.76892e-05	0.00320046	3833;7153;7155;8243;8697;9555;10592;10735;23047;23636;24137;79892	geneontology_Biological_Process	MCMBP;NUP62;STAG2;TOP2A;SMC1A;TOP2B;H2AFY;KIF4A;KIFC1;PDS5B;SMC2;CDC23
GO:2000104	negative regulation of DNA-dependent DNA replication	http://amigo.geneontology.org/amigo/term/GO:2000104	25	5	0.393135	12.7183	3.80852e-05	0.00320996	2956;3980;7014;8243;10735	geneontology_Biological_Process	LIG3;MSH6;STAG2;SMC1A;TERF2
GO:0019439	aromatic compound catabolic process	http://amigo.geneontology.org/amigo/term/GO:0019439	613	24	9.63967	2.48971	4.03153e-05	0.00337274	191;226;259;644;645;1854;2584;3098;3939;5315;6774;8942;9131;9238;10128;22916;23589;23644;26523;30833;54464;55571;192669;192670	geneontology_Biological_Process	PKM;AGO3;LDHA;NT5C;STAT3;AGO1;ALDOA;BLVRB;CNOT11;DUT;GALK1;HK1;KYNU;TBRG4;AGO4;AIFM1;AMBP;CARHSP1;LRPPRC;NCBP2;EDC4;XRN1;AHCY;BLVRA
GO:1901699	cellular response to nitrogen compound	http://amigo.geneontology.org/amigo/term/GO:1901699	614	24	9.65539	2.48566	4.13683e-05	0.00343539	197;523;839;857;988;999;1786;2729;2730;3843;4035;5315;5576;5591;5905;6774;6778;7430;9131;9296;23586;51606;54464;55004	geneontology_Biological_Process	PKM;STAT3;CASP6;CAV1;CDH1;DDX58;GCLC;GCLM;LAMTOR1;LRP1;PRKAR2A;RANGAP1;AHSG;AIFM1;CDC5L;PRKDC;ATP6V1A;ATP6V1F;IPO5;STAT6;XRN1;ATP6V1H;DNMT1;EZR
GO:0009260	ribonucleotide biosynthetic process	http://amigo.geneontology.org/amigo/term/GO:0009260	249	14	3.91562	3.57542	4.21581e-05	0.00347543	226;471;1503;2584;2639;3098;3939;5315;6774;10165;50808;51703;55902;197322	geneontology_Biological_Process	PKM;ACSL5;LDHA;STAT3;ACSS2;ALDOA;ATIC;GALK1;GCDH;HK1;ACSF3;CTPS1;AK3;SLC25A13
GO:0019359	nicotinamide nucleotide biosynthetic process	http://amigo.geneontology.org/amigo/term/GO:0019359	108	9	1.69834	5.29928	5.19636e-05	0.00417866	226;2584;3098;3939;5315;6774;8942;23475;83666	geneontology_Biological_Process	PKM;LDHA;STAT3;ALDOA;GALK1;HK1;KYNU;PARP9;QPRT
GO:0019363	pyridine nucleotide biosynthetic process	http://amigo.geneontology.org/amigo/term/GO:0019363	108	9	1.69834	5.29928	5.19636e-05	0.00417866	226;2584;3098;3939;5315;6774;8942;23475;83666	geneontology_Biological_Process	PKM;LDHA;STAT3;ALDOA;GALK1;HK1;KYNU;PARP9;QPRT
GO:0051917	regulation of fibrinolysis	http://amigo.geneontology.org/amigo/term/GO:0051917	14	4	0.220156	18.169	5.29085e-05	0.00417866	2147;5340;5345;7057	geneontology_Biological_Process	PLG;THBS1;SERPINF2;F2
GO:0035278	miRNA mediated inhibition of translation	http://amigo.geneontology.org/amigo/term/GO:0035278	14	4	0.220156	18.169	5.29085e-05	0.00417866	6774;26523;192669;192670	geneontology_Biological_Process	AGO3;STAT3;AGO1;AGO4
GO:0040033	negative regulation of translation, ncRNA-mediated	http://amigo.geneontology.org/amigo/term/GO:0040033	14	4	0.220156	18.169	5.29085e-05	0.00417866	6774;26523;192669;192670	geneontology_Biological_Process	AGO3;STAT3;AGO1;AGO4
GO:0045974	regulation of translation, ncRNA-mediated	http://amigo.geneontology.org/amigo/term/GO:0045974	14	4	0.220156	18.169	5.29085e-05	0.00417866	6774;26523;192669;192670	geneontology_Biological_Process	AGO3;STAT3;AGO1;AGO4
GO:0050999	regulation of nitric-oxide synthase activity	http://amigo.geneontology.org/amigo/term/GO:0050999	43	6	0.676192	8.87322	5.35865e-05	0.00420282	348;857;6697;7014;23564;23576	geneontology_Biological_Process	APOE;DDAH2;CAV1;DDAH1;SPR;TERF2
GO:0046390	ribose phosphate biosynthetic process	http://amigo.geneontology.org/amigo/term/GO:0046390	255	14	4.00998	3.49129	5.4594e-05	0.00425231	226;471;1503;2584;2639;3098;3939;5315;6774;10165;50808;51703;55902;197322	geneontology_Biological_Process	PKM;ACSL5;LDHA;STAT3;ACSS2;ALDOA;ATIC;GALK1;GCDH;HK1;ACSF3;CTPS1;AK3;SLC25A13
GO:0051346	negative regulation of hydrolase activity	http://amigo.geneontology.org/amigo/term/GO:0051346	431	19	6.77765	2.80333	5.5728e-05	0.00431091	197;259;301;335;710;727;3428;3698;3827;3843;5345;6059;7014;7057;7448;9097;10565;25824;65264	geneontology_Biological_Process	ANXA1;IFI16;PRDX5;ABCE1;C5;ITIH2;SERPING1;THBS1;USP14;VTN;AHSG;AMBP;APOA1;ARFGEF1;IPO5;KNG1;SERPINF2;TERF2;UBE2Z
GO:0006091	generation of precursor metabolites and energy	http://amigo.geneontology.org/amigo/term/GO:0006091	469	20	7.37521	2.71179	5.63596e-05	0.0043301	178;219;226;622;2110;2584;3098;3939;4705;5315;6774;7358;9238;10165;51218;55902;55967;56898;79611;91942	geneontology_Biological_Process	PKM;BDH1;LDHA;STAT3;ACSS2;ALDOA;ETFDH;GALK1;HK1;TBRG4;ACSS3;AGL;ALDH1B1;BDH2;NDUFA10;GLRX5;NDUFA12;NDUFAF2;SLC25A13;UGDH
GO:0098813	nuclear chromosome segregation	http://amigo.geneontology.org/amigo/term/GO:0098813	258	14	4.05715	3.4507	6.19355e-05	0.00472635	3833;7153;7155;8243;8697;9555;10096;10592;10735;23047;23636;24137;79892;192670	geneontology_Biological_Process	MCMBP;NUP62;AGO4;STAG2;TOP2A;ACTR3;SMC1A;TOP2B;H2AFY;KIF4A;KIFC1;PDS5B;SMC2;CDC23
GO:0072521	purine-containing compound metabolic process	http://amigo.geneontology.org/amigo/term/GO:0072521	551	22	8.66469	2.53904	6.38419e-05	0.00483913	191;226;471;523;2584;2639;3098;3939;4705;5315;6774;8942;10005;10165;26027;30833;50808;51703;55902;55967;84245;197322	geneontology_Biological_Process	PKM;ACSL5;LDHA;NT5C;STAT3;ACSS2;ALDOA;ATIC;GALK1;GCDH;HK1;KYNU;ACOT11;ACSF3;ACOT8;MRI1;NDUFA10;AK3;ATP6V1A;NDUFA12;SLC25A13;AHCY
GO:0042398	cellular modified amino acid biosynthetic process	http://amigo.geneontology.org/amigo/term/GO:0042398	45	6	0.707643	8.47885	6.97337e-05	0.00525048	471;2729;2730;5351;55349;79017	geneontology_Biological_Process	CHDH;PLOD1;ATIC;GCLC;GCLM;GGCT
GO:0003727	single-stranded RNA binding	http://amigo.geneontology.org/amigo/term/GO:0003727	88	8	1.38383	5.78104	7.32678e-05	0.00548004	301;1653;7458;23586;26523;51663;192669;192670	geneontology_Molecular_Function	AGO3;ANXA1;AGO1;DDX1;DDX58;AGO4;EIF4H;ZFR
GO:0002733	regulation of myeloid dendritic cell cytokine production	http://amigo.geneontology.org/amigo/term/GO:0002733	6	3	0.0943524	31.7957	7.42921e-05	0.00548402	1653;9188;23586	geneontology_Biological_Process	DDX1;DDX58;DDX21
GO:0002735	positive regulation of myeloid dendritic cell cytokine production	http://amigo.geneontology.org/amigo/term/GO:0002735	6	3	0.0943524	31.7957	7.42921e-05	0.00548402	1653;9188;23586	geneontology_Biological_Process	DDX1;DDX58;DDX21
GO:0019693	ribose phosphate metabolic process	http://amigo.geneontology.org/amigo/term/GO:0019693	519	21	8.16148	2.57306	7.78076e-05	0.00570623	226;471;523;1503;2584;2639;3098;3939;4705;5315;6774;7086;8942;10005;10165;26027;50808;51703;55902;55967;197322	geneontology_Biological_Process	PKM;ACSL5;LDHA;STAT3;ACSS2;ALDOA;ATIC;GALK1;GCDH;HK1;KYNU;ACOT11;ACSF3;ACOT8;CTPS1;NDUFA10;AK3;ATP6V1A;NDUFA12;SLC25A13;TKT
GO:0010951	negative regulation of endopeptidase activity	http://amigo.geneontology.org/amigo/term/GO:0010951	232	13	3.64829	3.56331	8.18377e-05	0.00596307	197;259;710;727;3428;3698;3827;5345;7057;7448;9097;25824;65264	geneontology_Biological_Process	IFI16;PRDX5;C5;ITIH2;SERPING1;THBS1;USP14;VTN;AHSG;AMBP;KNG1;SERPINF2;UBE2Z
GO:0045861	negative regulation of proteolysis	http://amigo.geneontology.org/amigo/term/GO:0045861	336	16	5.28373	3.02816	8.89152e-05	0.00643723	197;259;710;722;727;2147;3428;3698;3827;5345;7057;7448;7874;9097;25824;65264	geneontology_Biological_Process	IFI16;PRDX5;C5;ITIH2;SERPING1;THBS1;USP14;USP7;VTN;AHSG;AMBP;C4BPA;KNG1;SERPINF2;UBE2Z;F2
hsa00270	Cysteine and methionine metabolism	http://www.kegg.jp/kegg-bin/show_pathway?hsa00270+1786+191+2729+2730+3939+84245	47	6	0.739094	8.11805	8.95428e-05	0.00644138	1786;191;2729;2730;3939;84245	pathway_KEGG	LDHA;GCLC;GCLM;MRI1;AHCY;DNMT1
GO:0006260	DNA replication	http://amigo.geneontology.org/amigo/term/GO:0006260	268	14	4.21441	3.32194	9.29964e-05	0.00661833	1854;2956;3980;4678;5813;6416;6742;7014;7150;8243;10735;27000;79892;259282	geneontology_Biological_Process	MCMBP;DUT;LIG3;MAP2K4;BOD1L1;NASP;MSH6;SSBP1;STAG2;TOP1;PURA;SMC1A;DNAJC2;TERF2
GO:0009152	purine ribonucleotide biosynthetic process	http://amigo.geneontology.org/amigo/term/GO:0009152	235	13	3.69547	3.51782	9.31746e-05	0.00661833	226;471;2584;2639;3098;3939;5315;6774;10165;50808;51703;55902;197322	geneontology_Biological_Process	PKM;ACSL5;LDHA;STAT3;ACSS2;ALDOA;ATIC;GALK1;GCDH;HK1;ACSF3;AK3;SLC25A13
GO:0061135	endopeptidase regulator activity	http://amigo.geneontology.org/amigo/term/GO:0061135	173	11	2.72049	4.04338	9.47717e-05	0.0066897	197;259;710;727;3698;3827;5345;5721;9097;25824;65264	geneontology_Molecular_Function	PRDX5;C5;ITIH2;PSME2;SERPING1;USP14;AHSG;AMBP;KNG1;SERPINF2;UBE2Z
GO:0042168	heme metabolic process	http://amigo.geneontology.org/amigo/term/GO:0042168	30	5	0.471762	10.5986	9.57907e-05	0.00671963	259;644;645;7389;56898	geneontology_Biological_Process	BLVRB;AMBP;BDH2;UROD;BLVRA
hsa00280	Valine, leucine and isoleucine degradation	http://www.kegg.jp/kegg-bin/show_pathway?hsa00280+10449+18+197322+219+3028+593	48	6	0.754819	7.94892	0.000100998	0.00704119	10449;18;197322;219;3028;593	pathway_KEGG	ACAA2;HSD17B10;ACSF3;ALDH1B1;BCKDHA;ABAT
GO:0019362	pyridine nucleotide metabolic process	http://amigo.geneontology.org/amigo/term/GO:0019362	147	10	2.31163	4.32595	0.000112688	0.00776036	226;2584;3098;3939;5315;6774;7086;8942;23475;83666	geneontology_Biological_Process	PKM;LDHA;STAT3;ALDOA;GALK1;HK1;KYNU;PARP9;QPRT;TKT
GO:0046496	nicotinamide nucleotide metabolic process	http://amigo.geneontology.org/amigo/term/GO:0046496	147	10	2.31163	4.32595	0.000112688	0.00776036	226;2584;3098;3939;5315;6774;7086;8942;23475;83666	geneontology_Biological_Process	PKM;LDHA;STAT3;ALDOA;GALK1;HK1;KYNU;PARP9;QPRT;TKT
GO:0010466	negative regulation of peptidase activity	http://amigo.geneontology.org/amigo/term/GO:0010466	241	13	3.78982	3.43024	0.000119981	0.00814767	197;259;710;727;3428;3698;3827;5345;7057;7448;9097;25824;65264	geneontology_Biological_Process	IFI16;PRDX5;C5;ITIH2;SERPING1;THBS1;USP14;VTN;AHSG;AMBP;KNG1;SERPINF2;UBE2Z
GO:0090407	organophosphate biosynthetic process	http://amigo.geneontology.org/amigo/term/GO:0090407	658	24	10.3473	2.31944	0.000120834	0.00814767	226;335;471;1503;1841;1854;2584;2639;3098;3939;5315;6774;7086;8760;8942;10165;23475;50808;51084;51703;55750;55902;83666;197322	geneontology_Biological_Process	PKM;ACSL5;LDHA;STAT3;ACSS2;ALDOA;ATIC;DUT;GALK1;GCDH;HK1;KYNU;PARP9;QPRT;ACSF3;AGK;APOA1;CRYL1;CTPS1;AK3;SLC25A13;TKT;CDS2;DTYMK
GO:0097067	cellular response to thyroid hormone stimulus	http://amigo.geneontology.org/amigo/term/GO:0097067	17	4	0.267332	14.9627	0.000121198	0.00814767	1508;2729;2730;5469	geneontology_Biological_Process	GCLC;GCLM;MED1;CTSB
GO:0055102	lipase inhibitor activity	http://amigo.geneontology.org/amigo/term/GO:0055102	17	4	0.267332	14.9627	0.000121198	0.00814767	301;306;307;335	geneontology_Molecular_Function	ANXA1;ANXA4;ANXA3;APOA1
GO:0019674	NAD metabolic process	http://amigo.geneontology.org/amigo/term/GO:0019674	71	7	1.1165	6.26957	0.000124219	0.00815774	226;3098;3939;5315;8942;23475;83666	geneontology_Biological_Process	PKM;LDHA;ALDOA;HK1;KYNU;PARP9;QPRT
GO:0035280	miRNA loading onto RISC involved in gene silencing by miRNA	http://amigo.geneontology.org/amigo/term/GO:0035280	7	3	0.110078	27.2535	0.000128498	0.00815774	26523;192669;192670	geneontology_Biological_Process	AGO3;AGO1;AGO4
GO:0006787	porphyrin-containing compound catabolic process	http://amigo.geneontology.org/amigo/term/GO:0006787	7	3	0.110078	27.2535	0.000128498	0.00815774	259;644;645	geneontology_Biological_Process	BLVRB;AMBP;BLVRA
GO:0042167	heme catabolic process	http://amigo.geneontology.org/amigo/term/GO:0042167	7	3	0.110078	27.2535	0.000128498	0.00815774	259;644;645	geneontology_Biological_Process	BLVRB;AMBP;BLVRA
GO:0046149	pigment catabolic process	http://amigo.geneontology.org/amigo/term/GO:0046149	7	3	0.110078	27.2535	0.000128498	0.00815774	259;644;645	geneontology_Biological_Process	BLVRB;AMBP;BLVRA
GO:0002372	myeloid dendritic cell cytokine production	http://amigo.geneontology.org/amigo/term/GO:0002372	7	3	0.110078	27.2535	0.000128498	0.00815774	1653;9188;23586	geneontology_Biological_Process	DDX1;DDX58;DDX21
GO:0002732	positive regulation of dendritic cell cytokine production	http://amigo.geneontology.org/amigo/term/GO:0002732	7	3	0.110078	27.2535	0.000128498	0.00815774	1653;9188;23586	geneontology_Biological_Process	DDX1;DDX58;DDX21
GO:0032876	negative regulation of DNA endoreduplication	http://amigo.geneontology.org/amigo/term/GO:0032876	7	3	0.110078	27.2535	0.000128498	0.00815774	2956;8243;10735	geneontology_Biological_Process	MSH6;STAG2;SMC1A
GO:0003916	DNA topoisomerase activity	http://amigo.geneontology.org/amigo/term/GO:0003916	7	3	0.110078	27.2535	0.000128498	0.00815774	7150;7153;7155	geneontology_Molecular_Function	TOP1;TOP2A;TOP2B
GO:0034660	ncRNA metabolic process	http://amigo.geneontology.org/amigo/term/GO:0034660	538	21	8.46026	2.48219	0.000128571	0.00815774	16;1653;2962;3028;9097;9188;9555;10056;22916;23395;26523;51095;54464;54663;55127;55661;57038;58490;79731;192669;192670	geneontology_Biological_Process	AGO3;AGO1;DDX1;HSD17B10;NARS2;RARS2;USP14;AGO4;DDX27;TRNT1;GTF2F1;NCBP2;DDX21;FARSB;H2AFY;HEATR1;LARS2;RPRD1B;WDR74;XRN1;AARS
hsa00640	Propanoate metabolism	http://www.kegg.jp/kegg-bin/show_pathway?hsa00640+18+3939+55902+593+79611	32	5	0.503213	9.93616	0.000131929	0.00832408	18;3939;55902;593;79611	pathway_KEGG	LDHA;ACSS2;ACSS3;BCKDHA;ABAT
GO:0061134	peptidase regulator activity	http://amigo.geneontology.org/amigo/term/GO:0061134	211	12	3.31806	3.61657	0.000133292	0.00836333	197;259;710;727;857;3698;3827;5345;5721;9097;25824;65264	geneontology_Molecular_Function	PRDX5;C5;CAV1;ITIH2;PSME2;SERPING1;USP14;AHSG;AMBP;KNG1;SERPINF2;UBE2Z
GO:0009259	ribonucleotide metabolic process	http://amigo.geneontology.org/amigo/term/GO:0009259	500	20	7.8627	2.54366	0.00013449	0.0083919	226;471;523;1503;2584;2639;3098;3939;4705;5315;6774;8942;10005;10165;26027;50808;51703;55902;55967;197322	geneontology_Biological_Process	PKM;ACSL5;LDHA;STAT3;ACSS2;ALDOA;ATIC;GALK1;GCDH;HK1;KYNU;ACOT11;ACSF3;ACOT8;CTPS1;NDUFA10;AK3;ATP6V1A;NDUFA12;SLC25A13
GO:0031638	zymogen activation	http://amigo.geneontology.org/amigo/term/GO:0031638	51	6	0.801995	7.48134	0.000142494	0.0088062	715;2243;3428;5345;7057;7123	geneontology_Biological_Process	IFI16;FGA;THBS1;CLEC3B;SERPINF2;C1R
GO:0044092	negative regulation of molecular function	http://amigo.geneontology.org/amigo/term/GO:0044092	1061	33	16.6846	1.97787	0.000142689	0.0088062	197;259;301;306;307;335;348;710;727;857;1854;1974;2962;3428;3698;3827;3843;5345;5576;6059;7014;7057;7448;7874;9097;9555;9961;10565;23636;25824;65264;83666;151636	geneontology_Biological_Process	ANXA1;APOE;EIF4A2;IFI16;PRDX5;ABCE1;ANXA4;C5;CAV1;DTX3L;DUT;ITIH2;NUP62;PARP9;PRKAR2A;SERPING1;THBS1;USP14;USP7;VTN;AHSG;AMBP;ANXA3;APOA1;ARFGEF1;MVP;GTF2F1;H2AFY;IPO5;KNG1;SERPINF2;TERF2;UBE2Z
GO:0006891	intra-Golgi vesicle-mediated transport	http://amigo.geneontology.org/amigo/term/GO:0006891	33	5	0.518938	9.63506	0.000153505	0.00939571	8775;10466;22818;22820;26958	geneontology_Biological_Process	COPG1;COPZ1;NAPA;COG5;COPG2
GO:0019184	nonribosomal peptide biosynthetic process	http://amigo.geneontology.org/amigo/term/GO:0019184	18	4	0.283057	14.1314	0.000153905	0.00939571	2729;2730;56898;79017	geneontology_Biological_Process	GCLC;GCLM;BDH2;GGCT
GO:1901137	carbohydrate derivative biosynthetic process	http://amigo.geneontology.org/amigo/term/GO:1901137	712	25	11.1965	2.23284	0.000157524	0.00956492	226;471;1503;1841;1854;2584;2639;3098;3939;5238;5315;5351;6774;7086;7358;10005;10165;10318;10565;50808;51084;51703;55577;55902;197322	geneontology_Biological_Process	PKM;ACSL5;LDHA;PLOD1;STAT3;TNIP1;ACSS2;ALDOA;ATIC;DUT;GALK1;GCDH;HK1;NAGK;PGM3;ACSF3;ARFGEF1;ACOT8;CRYL1;CTPS1;AK3;SLC25A13;TKT;UGDH;DTYMK
hsa05168	Herpes simplex infection	http://www.kegg.jp/kegg-bin/show_pathway?hsa05168+10379+23586+2969+3105+3106+3107+3122+3190+5199+727+7874	185	11	2.9092	3.78111	0.000171584	0.0103629	10379;23586;2969;3105;3106;3107;3122;3190;5199;727;7874	pathway_KEGG	IRF9;C5;CFP;DDX58;HLA-A;HLA-B;HLA-C;HNRNPK;USP7;GTF2I;HLA-DRA
GO:1901605	alpha-amino acid metabolic process	http://amigo.geneontology.org/amigo/term/GO:1901605	217	12	3.41241	3.51657	0.000173272	0.0104092	191;1503;2639;2729;2730;5351;5832;8942;23564;23576;29968;84245	geneontology_Biological_Process	DDAH2;PLOD1;DDAH1;GCDH;GCLC;GCLM;KYNU;CTPS1;MRI1;ALDH18A1;PSAT1;AHCY
GO:0032768	regulation of monooxygenase activity	http://amigo.geneontology.org/amigo/term/GO:0032768	53	6	0.833446	7.19903	0.000176935	0.0104799	348;857;6697;7014;23564;23576	geneontology_Biological_Process	APOE;DDAH2;CAV1;DDAH1;SPR;TERF2
GO:0009435	NAD biosynthetic process	http://amigo.geneontology.org/amigo/term/GO:0009435	53	6	0.833446	7.19903	0.000176935	0.0104799	226;3098;5315;8942;23475;83666	geneontology_Biological_Process	PKM;ALDOA;HK1;KYNU;PARP9;QPRT
GO:0072330	monocarboxylic acid biosynthetic process	http://amigo.geneontology.org/amigo/term/GO:0072330	285	14	4.48174	3.12379	0.000177232	0.0104799	18;226;301;2584;3098;3939;5315;6774;8854;10005;26027;26063;55902;197322	geneontology_Biological_Process	PKM;ANXA1;LDHA;STAT3;ACSS2;ALDOA;GALK1;HK1;ACOT11;ACSF3;ALDH1A2;ACOT8;DECR2;ABAT
GO:0007596	blood coagulation	http://amigo.geneontology.org/amigo/term/GO:0007596	322	15	5.06358	2.96233	0.000187132	0.0110077	18;348;710;857;1192;2147;2243;3827;3998;5340;5345;5576;7057;7448;50808	geneontology_Biological_Process	APOE;CAV1;FGA;LMAN1;PLG;PRKAR2A;SERPING1;THBS1;VTN;ABAT;AK3;KNG1;SERPINF2;CLIC1;F2
GO:1901698	response to nitrogen compound	http://amigo.geneontology.org/amigo/term/GO:1901698	1033	32	16.2443	1.96992	0.00019462	0.0113888	18;197;301;348;523;839;857;988;999;1653;1786;2729;2730;3843;3939;4035;5315;5576;5591;5905;6774;6778;7430;8942;9097;9131;9188;9296;23586;51606;54464;55004	geneontology_Biological_Process	PKM;ANXA1;APOE;LDHA;STAT3;CASP6;CAV1;CDH1;DDX1;DDX58;GCLC;GCLM;KYNU;LAMTOR1;LRP1;PRKAR2A;RANGAP1;USP14;AHSG;AIFM1;CDC5L;PRKDC;ABAT;ATP6V1A;ATP6V1F;DDX21;IPO5;STAT6;XRN1;ATP6V1H;DNMT1;EZR
GO:0071417	cellular response to organonitrogen compound	http://amigo.geneontology.org/amigo/term/GO:0071417	555	21	8.7276	2.40616	0.000196911	0.011442	197;523;839;857;988;999;1786;2729;2730;3843;4035;5315;5576;5591;5905;6774;7430;9296;51606;54464;55004	geneontology_Biological_Process	PKM;STAT3;CASP6;CAV1;CDH1;GCLC;GCLM;LAMTOR1;LRP1;PRKAR2A;RANGAP1;AHSG;CDC5L;PRKDC;ATP6V1A;ATP6V1F;IPO5;XRN1;ATP6V1H;DNMT1;EZR
GO:0004175	endopeptidase activity	http://amigo.geneontology.org/amigo/term/GO:0004175	436	18	6.85627	2.62533	0.000197913	0.011442	629;713;714;715;716;823;826;839;1508;2147;2923;4312;5199;5340;7874;9097;23192;84301	geneontology_Molecular_Function	MMP1;C1QC;CASP6;CFP;PDIA3;PLG;USP14;USP7;C1QB;CAPN1;CAPNS1;ATG4B;C1S;C1R;CFB;CTSB;DDI2;F2
GO:0006164	purine nucleotide biosynthetic process	http://amigo.geneontology.org/amigo/term/GO:0006164	254	13	3.99425	3.25468	0.000201691	0.011442	226;471;2584;2639;3098;3939;5315;6774;10165;50808;51703;55902;197322	geneontology_Biological_Process	PKM;ACSL5;LDHA;STAT3;ACSS2;ALDOA;ATIC;GALK1;GCDH;HK1;ACSF3;AK3;SLC25A13
GO:0033015	tetrapyrrole catabolic process	http://amigo.geneontology.org/amigo/term/GO:0033015	8	3	0.125803	23.8468	0.000203204	0.011442	259;644;645	geneontology_Biological_Process	BLVRB;AMBP;BLVRA
GO:0000052	citrulline metabolic process	http://amigo.geneontology.org/amigo/term/GO:0000052	8	3	0.125803	23.8468	0.000203204	0.011442	5832;23564;23576	geneontology_Biological_Process	DDAH2;DDAH1;ALDH18A1
GO:0010501	RNA secondary structure unwinding	http://amigo.geneontology.org/amigo/term/GO:0010501	8	3	0.125803	23.8468	0.000203204	0.011442	26523;192669;192670	geneontology_Biological_Process	AGO3;AGO1;AGO4
GO:0006163	purine nucleotide metabolic process	http://amigo.geneontology.org/amigo/term/GO:0006163	516	20	8.11431	2.46478	0.000204077	0.011442	226;471;523;2584;2639;3098;3939;4705;5315;6774;8942;10005;10165;26027;30833;50808;51703;55902;55967;197322	geneontology_Biological_Process	PKM;ACSL5;LDHA;NT5C;STAT3;ACSS2;ALDOA;ATIC;GALK1;GCDH;HK1;KYNU;ACOT11;ACSF3;ACOT8;NDUFA10;AK3;ATP6V1A;NDUFA12;SLC25A13
GO:1901135	carbohydrate derivative metabolic process	http://amigo.geneontology.org/amigo/term/GO:1901135	1175	35	18.4773	1.89421	0.0002042	0.011442	191;226;471;523;1503;1841;1854;2584;2639;3098;3698;3939;4705;5238;5315;5351;6774;7086;7358;8942;10005;10165;10318;10565;26027;30833;50808;51084;51703;55577;55902;55967;81876;84245;197322	geneontology_Biological_Process	PKM;ACSL5;LDHA;NT5C;PLOD1;STAT3;TNIP1;ACSS2;ALDOA;ATIC;DUT;GALK1;GCDH;HK1;ITIH2;KYNU;NAGK;PGM3;RAB1B;ACOT11;ACSF3;ARFGEF1;ACOT8;CRYL1;CTPS1;MRI1;NDUFA10;AK3;ATP6V1A;NDUFA12;SLC25A13;TKT;UGDH;AHCY;DTYMK
GO:0043394	proteoglycan binding	http://amigo.geneontology.org/amigo/term/GO:0043394	35	5	0.550389	9.08449	0.000204647	0.011442	348;1508;3075;4035;7057	geneontology_Molecular_Function	APOE;LRP1;THBS1;CFH;CTSB
hsa04612	Antigen processing and presentation	http://www.kegg.jp/kegg-bin/show_pathway?hsa04612+1508+2923+3105+3106+3107+3122+5721	77	7	1.21086	5.78104	0.00020734	0.0115354	1508;2923;3105;3106;3107;3122;5721	pathway_KEGG	HLA-A;HLA-B;HLA-C;PDIA3;PSME2;HLA-DRA;CTSB
GO:0016887	ATPase activity	http://amigo.geneontology.org/amigo/term/GO:0016887	438	18	6.88772	2.61335	0.000209302	0.0115875	22;301;523;1653;1974;2956;3832;3833;6059;7153;7155;8886;9188;9296;24137;51182;51606;79784	geneontology_Molecular_Function	ANXA1;EIF4A2;ABCB7;ABCE1;DDX1;MSH6;TOP2A;HSPA14;MYH14;TOP2B;ATP6V1A;ATP6V1F;DDX21;KIF11;KIF4A;KIFC1;ATP6V1H;DDX18
GO:0050817	coagulation	http://amigo.geneontology.org/amigo/term/GO:0050817	326	15	5.12648	2.92598	0.000213845	0.0117662	18;348;710;857;1192;2147;2243;3827;3998;5340;5345;5576;7057;7448;50808	geneontology_Biological_Process	APOE;CAV1;FGA;LMAN1;PLG;PRKAR2A;SERPING1;THBS1;VTN;ABAT;AK3;KNG1;SERPINF2;CLIC1;F2
GO:0140053	mitochondrial gene expression	http://amigo.geneontology.org/amigo/term/GO:0140053	159	10	2.50034	3.99946	0.000214614	0.0117662	3028;6150;7818;9238;10128;23395;51069;51095;55037;57038	geneontology_Biological_Process	PTCD3;HSD17B10;MRPL2;RARS2;TBRG4;TRNT1;LRPPRC;DAP3;LARS2;MRPL23
GO:0022402	cell cycle process	http://amigo.geneontology.org/amigo/term/GO:0022402	1274	37	20.0342	1.84685	0.000219152	0.011957	301;2010;2273;2956;3832;3833;4678;4735;5469;5591;5721;6009;7014;7057;7153;7155;7430;8243;8697;8726;9238;9555;10096;10592;10617;10735;22974;23047;23176;23636;24137;29766;55004;55571;58490;79892;192670	geneontology_Biological_Process	MCMBP;ANXA1;CNOT11;FHL1;LAMTOR1;NUP62;PSME2;STAMBP;TBRG4;THBS1;TMOD3;AGO4;NASP;RHEB;MSH6;STAG2;TOP2A;ACTR3;PRKDC;SMC1A;TOP2B;TPX2;H2AFY;KIF11;KIF4A;KIFC1;MED1;PDS5B;RPRD1B;SEPT2;SEPT8;SMC2;TERF2;CDC23;EED;EMD;EZR
GO:0007599	hemostasis	http://amigo.geneontology.org/amigo/term/GO:0007599	327	15	5.1422	2.91704	0.000221017	0.0120008	18;348;710;857;1192;2147;2243;3827;3998;5340;5345;5576;7057;7448;50808	geneontology_Biological_Process	APOE;CAV1;FGA;LMAN1;PLG;PRKAR2A;SERPING1;THBS1;VTN;ABAT;AK3;KNG1;SERPINF2;CLIC1;F2
GO:0033572	transferrin transport	http://amigo.geneontology.org/amigo/term/GO:0033572	36	5	0.566114	8.83214	0.000234626	0.0126338	392;523;7018;9296;51606	geneontology_Biological_Process	ATP6V1A;ATP6V1F;TF;ARHGAP1;ATP6V1H
GO:0040029	regulation of gene expression, epigenetic	http://amigo.geneontology.org/amigo/term/GO:0040029	258	13	4.05715	3.20422	0.000234912	0.0126338	1786;3428;6774;7913;8726;9031;9188;9555;26523;53615;64425;192669;192670	geneontology_Biological_Process	AGO3;IFI16;STAT3;AGO1;POLR1E;AGO4;DEK;MBD3;DDX21;H2AFY;BAZ1B;DNMT1;EED
hsa00480	Glutathione metabolism	http://www.kegg.jp/kegg-bin/show_pathway?hsa00480+2729+2730+2878+2938+493869+79017	56	6	0.880622	6.81336	0.000240577	0.0128771	2729;2730;2878;2938;493869;79017	pathway_KEGG	GCLC;GCLM;GPX8;GSTA1;GGCT;GPX3
GO:0051052	regulation of DNA metabolic process	http://amigo.geneontology.org/amigo/term/GO:0051052	405	17	6.36879	2.66927	0.000244842	0.0130436	306;1786;2956;3980;6416;6778;7014;7874;7913;8243;9131;10735;27000;53615;54464;83666;151636	geneontology_Biological_Process	DTX3L;LIG3;MAP2K4;PARP9;USP7;AIFM1;ANXA3;MSH6;STAG2;DEK;MBD3;SMC1A;DNAJC2;STAT6;TERF2;XRN1;DNMT1
GO:0009150	purine ribonucleotide metabolic process	http://amigo.geneontology.org/amigo/term/GO:0009150	484	19	7.61109	2.49636	0.000250552	0.0132851	226;471;523;2584;2639;3098;3939;4705;5315;6774;8942;10005;10165;26027;50808;51703;55902;55967;197322	geneontology_Biological_Process	PKM;ACSL5;LDHA;STAT3;ACSS2;ALDOA;ATIC;GALK1;GCDH;HK1;KYNU;ACOT11;ACSF3;ACOT8;NDUFA10;AK3;ATP6V1A;NDUFA12;SLC25A13
GO:0006417	regulation of translation	http://amigo.geneontology.org/amigo/term/GO:0006417	332	15	5.22083	2.87311	0.000260085	0.0137262	16;1653;1974;5813;6774;7057;7458;10128;22916;26523;54464;55037;55571;192669;192670	geneontology_Biological_Process	AGO3;EIF4A2;PTCD3;STAT3;AGO1;CNOT11;DDX1;THBS1;AGO4;LRPPRC;NCBP2;PURA;EIF4H;XRN1;AARS
GO:0006733	oxidoreduction coenzyme metabolic process	http://amigo.geneontology.org/amigo/term/GO:0006733	163	10	2.56324	3.90131	0.000262358	0.0137817	226;2584;3098;3939;5315;6774;7086;8942;23475;83666	geneontology_Biological_Process	PKM;LDHA;STAT3;ALDOA;GALK1;HK1;KYNU;PARP9;QPRT;TKT
GO:0010608	posttranscriptional regulation of gene expression	http://amigo.geneontology.org/amigo/term/GO:0010608	486	19	7.64254	2.48608	0.000263857	0.0137963	16;857;1653;1974;5813;6774;7057;7458;9238;10128;22916;23589;26523;54464;55037;55571;83666;192669;192670	geneontology_Biological_Process	AGO3;EIF4A2;PTCD3;STAT3;AGO1;CAV1;CNOT11;DDX1;PARP9;TBRG4;THBS1;AGO4;CARHSP1;LRPPRC;NCBP2;PURA;EIF4H;XRN1;AARS
GO:0006778	porphyrin-containing compound metabolic process	http://amigo.geneontology.org/amigo/term/GO:0006778	37	5	0.58184	8.59343	0.000267831	0.0139396	259;644;645;7389;56898	geneontology_Biological_Process	BLVRB;AMBP;BDH2;UROD;BLVRA
GO:0043648	dicarboxylic acid metabolic process	http://amigo.geneontology.org/amigo/term/GO:0043648	107	8	1.68262	4.7545	0.000287466	0.0148248	471;2729;2730;5832;8942;10005;23475;197322	geneontology_Biological_Process	ATIC;GCLC;GCLM;KYNU;QPRT;ACSF3;ACOT8;ALDH18A1
GO:0003697	single-stranded DNA binding	http://amigo.geneontology.org/amigo/term/GO:0003697	107	8	1.68262	4.7545	0.000287466	0.0148248	301;3190;5813;6742;7014;7150;10128;10592	geneontology_Molecular_Function	ANXA1;HNRNPK;SSBP1;TOP1;LRPPRC;PURA;SMC2;TERF2
GO:0009124	nucleoside monophosphate biosynthetic process	http://amigo.geneontology.org/amigo/term/GO:0009124	165	10	2.59469	3.85402	0.000289381	0.0148558	226;471;1854;2584;3098;3939;5315;6774;10165;50808	geneontology_Biological_Process	PKM;LDHA;STAT3;ALDOA;ATIC;DUT;GALK1;HK1;AK3;SLC25A13
GO:0016627	oxidoreductase activity, acting on the CH-CH group of donors	http://amigo.geneontology.org/amigo/term/GO:0016627	58	6	0.912073	6.57842	0.000292141	0.0149296	644;645;2639;26063;28976;56898	geneontology_Molecular_Function	BLVRB;GCDH;ACAD9;BDH2;DECR2;BLVRA
GO:0046951	ketone body biosynthetic process	http://amigo.geneontology.org/amigo/term/GO:0046951	9	3	0.141529	21.1971	0.000301262	0.0152161	622;56898;79611	geneontology_Biological_Process	BDH1;ACSS3;BDH2
GO:0070922	small RNA loading onto RISC	http://amigo.geneontology.org/amigo/term/GO:0070922	9	3	0.141529	21.1971	0.000301262	0.0152161	26523;192669;192670	geneontology_Biological_Process	AGO3;AGO1;AGO4
GO:0004866	endopeptidase inhibitor activity	http://amigo.geneontology.org/amigo/term/GO:0004866	166	10	2.61042	3.83081	0.000303742	0.0152161	197;259;710;727;3698;3827;5345;9097;25824;65264	geneontology_Molecular_Function	PRDX5;C5;ITIH2;SERPING1;USP14;AHSG;AMBP;KNG1;SERPINF2;UBE2Z
GO:0015682	ferric iron transport	http://amigo.geneontology.org/amigo/term/GO:0015682	38	5	0.597565	8.36729	0.000304485	0.0152161	392;523;7018;9296;51606	geneontology_Biological_Process	ATP6V1A;ATP6V1F;TF;ARHGAP1;ATP6V1H
GO:0072512	trivalent inorganic cation transport	http://amigo.geneontology.org/amigo/term/GO:0072512	38	5	0.597565	8.36729	0.000304485	0.0152161	392;523;7018;9296;51606	geneontology_Biological_Process	ATP6V1A;ATP6V1F;TF;ARHGAP1;ATP6V1H
GO:0044877	protein-containing complex binding	http://amigo.geneontology.org/amigo/term/GO:0044877	1062	32	16.7004	1.91612	0.000317965	0.0158198	259;335;348;731;732;822;1508;1525;2956;3122;4035;5315;5340;5469;6059;7014;7057;7430;7448;7458;8243;8726;8775;9097;9555;10096;10128;23780;24148;53615;55037;79784	geneontology_Molecular_Function	C8A;PKM;APOE;PTCD3;ABCE1;APOL2;C8B;LRP1;NAPA;PLG;THBS1;USP14;VTN;AMBP;APOA1;CAPG;MSH6;ACTR3;LRPPRC;MBD3;MYH14;PRPF6;SMC1A;EIF4H;H2AFY;HLA-DRA;MED1;TERF2;CTSB;CXADR;EED;EZR
GO:0006259	DNA metabolic process	http://amigo.geneontology.org/amigo/term/GO:0006259	970	30	15.2536	1.96674	0.000319709	0.0158303	306;988;1653;1786;1854;2956;3980;4678;5591;5813;6416;6742;6778;7014;7150;7153;7155;7874;7913;8243;9131;10735;23047;27000;53615;54464;79892;83666;151636;259282	geneontology_Biological_Process	MCMBP;DDX1;DTX3L;DUT;LIG3;MAP2K4;PARP9;USP7;AIFM1;ANXA3;BOD1L1;NASP;MSH6;SSBP1;STAG2;TOP1;TOP2A;CDC5L;DEK;MBD3;PRKDC;PURA;SMC1A;TOP2B;DNAJC2;PDS5B;STAT6;TERF2;XRN1;DNMT1
hsa05416	Viral myocarditis	http://www.kegg.jp/kegg-bin/show_pathway?hsa05416+1525+3105+3106+3107+3122+857	59	6	0.927798	6.46692	0.000320979	0.0158303	1525;3105;3106;3107;3122;857	pathway_KEGG	CAV1;HLA-A;HLA-B;HLA-C;HLA-DRA;CXADR
GO:0072522	purine-containing compound biosynthetic process	http://amigo.geneontology.org/amigo/term/GO:0072522	267	13	4.19868	3.09621	0.000327177	0.0160658	226;471;2584;2639;3098;3939;5315;6774;10165;50808;51703;55902;197322	geneontology_Biological_Process	PKM;ACSL5;LDHA;STAT3;ACSS2;ALDOA;ATIC;GALK1;GCDH;HK1;ACSF3;AK3;SLC25A13
GO:0009719	response to endogenous stimulus	http://amigo.geneontology.org/amigo/term/GO:0009719	1595	43	25.082	1.71438	0.000330936	0.01618	178;197;301;306;335;348;382;523;839;857;988;999;1508;1786;2729;2730;2962;3843;4035;4678;5315;5469;5576;5591;5905;6294;6774;7057;7123;7430;8243;8854;8886;9131;9296;9667;22916;23636;51606;53615;54464;55004;57530	geneontology_Biological_Process	PKM;ANXA1;APOE;STAT3;ARF6;CASP6;CAV1;CDH1;CGN;GCLC;GCLM;LAMTOR1;LRP1;NUP62;PRKAR2A;RANGAP1;THBS1;AGL;AHSG;AIFM1;ALDH1A2;ANXA3;APOA1;NASP;SAFB2;SAFB;CDC5L;GTF2F1;MBD3;NCBP2;PRKDC;SMC1A;ATP6V1A;ATP6V1F;CLEC3B;IPO5;MED1;XRN1;ATP6V1H;CTSB;DDX18;DNMT1;EZR
GO:0009141	nucleoside triphosphate metabolic process	http://amigo.geneontology.org/amigo/term/GO:0009141	304	14	4.78052	2.92855	0.000342709	0.0166425	226;523;1503;1841;1854;2584;3098;3939;4705;5315;6774;10165;50808;55967	geneontology_Biological_Process	PKM;LDHA;STAT3;ALDOA;DUT;GALK1;HK1;CTPS1;NDUFA10;AK3;ATP6V1A;NDUFA12;SLC25A13;DTYMK
GO:0052547	regulation of peptidase activity	http://amigo.geneontology.org/amigo/term/GO:0052547	417	17	6.55749	2.59246	0.000343353	0.0166425	197;259;710;727;857;3428;3698;3827;5345;5721;6774;7057;7448;9097;9131;25824;65264	geneontology_Biological_Process	IFI16;PRDX5;STAT3;C5;CAV1;ITIH2;PSME2;SERPING1;THBS1;USP14;VTN;AHSG;AIFM1;AMBP;KNG1;SERPINF2;UBE2Z
GO:0008156	negative regulation of DNA replication	http://amigo.geneontology.org/amigo/term/GO:0008156	39	5	0.61329	8.15274	0.000344816	0.0166425	2956;3980;7014;8243;10735	geneontology_Biological_Process	LIG3;MSH6;STAG2;SMC1A;TERF2
GO:0009147	pyrimidine nucleoside triphosphate metabolic process	http://amigo.geneontology.org/amigo/term/GO:0009147	22	4	0.345959	11.5621	0.000350131	0.0168111	1503;1841;1854;50808	geneontology_Biological_Process	DUT;CTPS1;AK3;DTYMK
hsa05169	Epstein-Barr virus infection	http://www.kegg.jp/kegg-bin/show_pathway?hsa05169+10379+23586+2923+3105+3106+3107+3122+4791+6416+6774+7874	201	11	3.1608	3.48013	0.000351286	0.0168111	10379;23586;2923;3105;3106;3107;3122;4791;6416;6774;7874	pathway_KEGG	NFKB2;IRF9;STAT3;DDX58;HLA-A;HLA-B;HLA-C;MAP2K4;PDIA3;USP7;HLA-DRA
GO:0009127	purine nucleoside monophosphate biosynthetic process	http://amigo.geneontology.org/amigo/term/GO:0009127	139	9	2.18583	4.11743	0.000356831	0.016933	226;471;2584;3098;3939;5315;6774;10165;50808	geneontology_Biological_Process	PKM;LDHA;STAT3;ALDOA;ATIC;GALK1;HK1;AK3;SLC25A13
GO:0009168	purine ribonucleoside monophosphate biosynthetic process	http://amigo.geneontology.org/amigo/term/GO:0009168	139	9	2.18583	4.11743	0.000356831	0.016933	226;471;2584;3098;3939;5315;6774;10165;50808	geneontology_Biological_Process	PKM;LDHA;STAT3;ALDOA;ATIC;GALK1;HK1;AK3;SLC25A13
GO:0090307	mitotic spindle assembly	http://amigo.geneontology.org/amigo/term/GO:0090307	61	6	0.959249	6.25489	0.000385319	0.0182083	3832;3833;8243;10735;22974;24137	geneontology_Biological_Process	STAG2;SMC1A;TPX2;KIF11;KIF4A;KIFC1
hsa04216	Ferroptosis	http://www.kegg.jp/kegg-bin/show_pathway?hsa04216+1356+2729+2730+51703+7018	40	5	0.629016	7.94892	0.000389062	0.0183086	1356;2729;2730;51703;7018	pathway_KEGG	ACSL5;GCLC;GCLM;TF;CP
GO:0046031	ADP metabolic process	http://amigo.geneontology.org/amigo/term/GO:0046031	86	7	1.35238	5.17604	0.000410927	0.0192168	226;2584;3098;3939;5315;6774;50808	geneontology_Biological_Process	PKM;LDHA;STAT3;ALDOA;GALK1;HK1;AK3
GO:0034248	regulation of cellular amide metabolic process	http://amigo.geneontology.org/amigo/term/GO:0034248	385	16	6.05428	2.64276	0.000414367	0.0192168	16;348;1653;1974;5813;6774;7057;7458;10128;22916;26523;54464;55037;55571;192669;192670	geneontology_Biological_Process	AGO3;APOE;EIF4A2;PTCD3;STAT3;AGO1;CNOT11;DDX1;THBS1;AGO4;LRPPRC;NCBP2;PURA;EIF4H;XRN1;AARS
GO:0046822	regulation of nucleocytoplasmic transport	http://amigo.geneontology.org/amigo/term/GO:0046822	113	8	1.77697	4.50205	0.000416251	0.0192168	999;2010;3843;4600;5469;5905;22916;23636	geneontology_Biological_Process	CDH1;MX2;NUP62;RANGAP1;NCBP2;IPO5;MED1;EMD
GO:0006887	exocytosis	http://amigo.geneontology.org/amigo/term/GO:0006887	894	28	14.0585	1.99168	0.00041737	0.0192168	178;197;213;226;301;306;335;710;823;1508;2243;3608;3827;5199;5315;5340;5345;7018;7057;7123;8027;8775;8907;9961;10565;55004;64005;139322	geneontology_Biological_Process	PKM;ANXA1;ALDOA;APOOL;CFP;FGA;LAMTOR1;NAPA;PLG;SERPING1;THBS1;AGL;AHSG;ANXA3;APOA1;ARFGEF1;CAPN1;MVP;CLEC3B;ILF2;KNG1;MYO1G;SERPINF2;STAM;TF;ALB;AP1M1;CTSB
GO:0009142	nucleoside triphosphate biosynthetic process	http://amigo.geneontology.org/amigo/term/GO:0009142	142	9	2.23301	4.03044	0.000417533	0.0192168	226;1503;1841;2584;3098;3939;5315;6774;10165	geneontology_Biological_Process	PKM;LDHA;STAT3;ALDOA;GALK1;HK1;CTPS1;SLC25A13;DTYMK
GO:0031639	plasminogen activation	http://amigo.geneontology.org/amigo/term/GO:0031639	23	4	0.361684	11.0594	0.000418633	0.0192168	2243;5345;7057;7123	geneontology_Biological_Process	FGA;THBS1;CLEC3B;SERPINF2
GO:0030414	peptidase inhibitor activity	http://amigo.geneontology.org/amigo/term/GO:0030414	173	10	2.72049	3.6758	0.000421901	0.0192168	197;259;710;727;3698;3827;5345;9097;25824;65264	geneontology_Molecular_Function	PRDX5;C5;ITIH2;SERPING1;USP14;AHSG;AMBP;KNG1;SERPINF2;UBE2Z
GO:0010872	regulation of cholesterol esterification	http://amigo.geneontology.org/amigo/term/GO:0010872	10	3	0.157254	19.0774	0.000425375	0.0192168	335;348;55004	geneontology_Biological_Process	APOE;LAMTOR1;APOA1
GO:0051715	cytolysis in other organism	http://amigo.geneontology.org/amigo/term/GO:0051715	10	3	0.157254	19.0774	0.000425375	0.0192168	213;735;2147	geneontology_Biological_Process	C9;ALB;F2
GO:0032875	regulation of DNA endoreduplication	http://amigo.geneontology.org/amigo/term/GO:0032875	10	3	0.157254	19.0774	0.000425375	0.0192168	2956;8243;10735	geneontology_Biological_Process	MSH6;STAG2;SMC1A
GO:1901681	sulfur compound binding	http://amigo.geneontology.org/amigo/term/GO:1901681	240	12	3.7741	3.17957	0.000435136	0.0195285	307;348;2147;2639;3075;3827;4035;7057;7123;7448;26027;28976	geneontology_Molecular_Function	APOE;ANXA4;GCDH;LRP1;THBS1;VTN;ACAD9;ACOT11;CLEC3B;KNG1;CFH;F2
GO:0004812	aminoacyl-tRNA ligase activity	http://amigo.geneontology.org/amigo/term/GO:0004812	41	5	0.644741	7.75505	0.000437463	0.0195285	16;10056;23395;57038;79731	geneontology_Molecular_Function	NARS2;RARS2;FARSB;LARS2;AARS
GO:0016875	ligase activity, forming carbon-oxygen bonds	http://amigo.geneontology.org/amigo/term/GO:0016875	41	5	0.644741	7.75505	0.000437463	0.0195285	16;10056;23395;57038;79731	geneontology_Molecular_Function	NARS2;RARS2;FARSB;LARS2;AARS
GO:0140098	catalytic activity, acting on RNA	http://amigo.geneontology.org/amigo/term/GO:0140098	350	15	5.50389	2.72535	0.000454166	0.0201943	16;1653;1974;8886;9188;10056;23395;26523;51095;54464;57038;57062;64425;79731;192669	geneontology_Molecular_Function	AGO3;EIF4A2;AGO1;DDX1;DDX24;NARS2;POLR1E;RARS2;TRNT1;DDX21;FARSB;LARS2;XRN1;AARS;DDX18
GO:0051187	cofactor catabolic process	http://amigo.geneontology.org/amigo/term/GO:0051187	63	6	0.9907	6.05632	0.00045932	0.0202639	191;259;644;645;2878;25824	geneontology_Biological_Process	PRDX5;BLVRB;AMBP;GPX3;AHCY;BLVRA
GO:0006220	pyrimidine nucleotide metabolic process	http://amigo.geneontology.org/amigo/term/GO:0006220	63	6	0.9907	6.05632	0.00045932	0.0202639	1503;1841;1854;8760;30833;50808	geneontology_Biological_Process	NT5C;DUT;CTPS1;AK3;CDS2;DTYMK
GO:0034655	nucleobase-containing compound catabolic process	http://amigo.geneontology.org/amigo/term/GO:0034655	550	20	8.64897	2.31241	0.000464042	0.0203926	191;226;1854;2584;3098;3939;5315;6774;9131;9238;10128;22916;23589;23644;26523;30833;54464;55571;192669;192670	geneontology_Biological_Process	PKM;AGO3;LDHA;NT5C;STAT3;AGO1;ALDOA;CNOT11;DUT;GALK1;HK1;TBRG4;AGO4;AIFM1;CARHSP1;LRPPRC;NCBP2;EDC4;XRN1;AHCY
GO:1901570	fatty acid derivative biosynthetic process	http://amigo.geneontology.org/amigo/term/GO:1901570	88	7	1.38383	5.05841	0.000472753	0.0206949	301;622;2639;51703;56898;79611;197322	geneontology_Biological_Process	ACSL5;ANXA1;BDH1;GCDH;ACSF3;ACSS3;BDH2
GO:0042623	ATPase activity, coupled	http://amigo.geneontology.org/amigo/term/GO:0042623	352	15	5.53534	2.70986	0.000481922	0.0210148	22;301;523;1653;1974;2956;3832;7153;7155;8886;9188;9296;51182;51606;79784	geneontology_Molecular_Function	ANXA1;EIF4A2;ABCB7;DDX1;MSH6;TOP2A;HSPA14;MYH14;TOP2B;ATP6V1A;ATP6V1F;DDX21;KIF11;ATP6V1H;DDX18
GO:0052548	regulation of endopeptidase activity	http://amigo.geneontology.org/amigo/term/GO:0052548	392	16	6.16436	2.59557	0.000504159	0.0218957	197;259;710;727;3428;3698;3827;5345;5721;6774;7057;7448;9097;9131;25824;65264	geneontology_Biological_Process	IFI16;PRDX5;STAT3;C5;ITIH2;PSME2;SERPING1;THBS1;USP14;VTN;AHSG;AIFM1;AMBP;KNG1;SERPINF2;UBE2Z
GO:0014070	response to organic cyclic compound	http://amigo.geneontology.org/amigo/term/GO:0014070	905	28	14.2315	1.96747	0.000506001	0.0218957	18;178;301;306;839;857;988;999;1653;1854;2729;2730;3939;4678;5469;6294;6774;7057;7430;8854;8886;8942;9131;9188;9667;23586;53615;54464	geneontology_Biological_Process	ANXA1;LDHA;STAT3;CASP6;CAV1;CDH1;DDX1;DDX58;DUT;GCLC;GCLM;KYNU;THBS1;AGL;AIFM1;ALDH1A2;ANXA3;NASP;SAFB2;SAFB;CDC5L;MBD3;ABAT;DDX21;MED1;XRN1;DDX18;EZR
GO:0009132	nucleoside diphosphate metabolic process	http://amigo.geneontology.org/amigo/term/GO:0009132	117	8	1.83987	4.34813	0.000525623	0.022658	226;1841;2584;3098;3939;5315;6774;50808	geneontology_Biological_Process	PKM;LDHA;STAT3;ALDOA;GALK1;HK1;AK3;DTYMK
GO:0051276	chromosome organization	http://amigo.geneontology.org/amigo/term/GO:0051276	1143	33	17.9741	1.83597	0.000544019	0.0233618	301;1653;1786;2956;3833;4678;5591;5813;6294;7014;7150;7153;7155;7874;7913;8243;8295;8697;8726;9031;9131;9555;10592;10735;23047;23636;24137;27000;53615;54464;79892;151636;192670	geneontology_Biological_Process	MCMBP;ANXA1;DDX1;DTX3L;NUP62;USP7;AGO4;AIFM1;NASP;MSH6;SAFB;STAG2;TOP1;TOP2A;DEK;MBD3;PRKDC;PURA;SMC1A;TOP2B;DNAJC2;H2AFY;KIF4A;KIFC1;PDS5B;SMC2;TERF2;TRRAP;XRN1;BAZ1B;CDC23;DNMT1;EED
GO:0016903	oxidoreductase activity, acting on the aldehyde or oxo group of donors	http://amigo.geneontology.org/amigo/term/GO:0016903	43	5	0.676192	7.39435	0.000547723	0.0234318	219;593;5832;8854;126133	geneontology_Molecular_Function	ALDH16A1;ALDH1A2;ALDH1B1;BCKDHA;ALDH18A1
GO:0009063	cellular amino acid catabolic process	http://amigo.geneontology.org/amigo/term/GO:0009063	118	8	1.8556	4.31128	0.000556314	0.0235923	18;191;593;2639;3028;8942;23564;23576	geneontology_Biological_Process	DDAH2;DDAH1;GCDH;HSD17B10;KYNU;BCKDHA;ABAT;AHCY
GO:0004197	cysteine-type endopeptidase activity	http://amigo.geneontology.org/amigo/term/GO:0004197	118	8	1.8556	4.31128	0.000556314	0.0235923	823;826;839;1508;2923;7874;9097;23192	geneontology_Molecular_Function	CASP6;PDIA3;USP14;USP7;CAPN1;CAPNS1;ATG4B;CTSB
GO:0006631	fatty acid metabolic process	http://amigo.geneontology.org/amigo/term/GO:0006631	357	15	5.61397	2.67191	0.000557743	0.0235923	301;857;2110;2639;2938;10005;10449;26027;26063;28976;51084;51703;55902;56898;197322	geneontology_Biological_Process	ACSL5;ANXA1;ACAA2;ACSS2;CAV1;ETFDH;GCDH;GSTA1;ACAD9;ACOT11;ACSF3;BDH2;ACOT8;CRYL1;DECR2
GO:0006261	DNA-dependent DNA replication	http://amigo.geneontology.org/amigo/term/GO:0006261	148	9	2.32736	3.86704	0.000564548	0.0237911	2956;3980;5813;6742;7014;8243;10735;79892;259282	geneontology_Biological_Process	MCMBP;LIG3;BOD1L1;MSH6;SSBP1;STAG2;PURA;SMC1A;TERF2
GO:0007049	cell cycle	http://amigo.geneontology.org/amigo/term/GO:0007049	1739	45	27.3465	1.64555	0.000575422	0.0238747	301;382;988;1192;2010;2273;2956;3832;3833;3843;3980;4600;4678;4735;5469;5591;5721;6009;6774;7014;7057;7153;7155;7430;8243;8697;8726;9238;9555;10096;10592;10617;10735;22974;23047;23176;23636;24137;29766;55004;55571;58490;79892;126353;192670	geneontology_Biological_Process	MCMBP;ANXA1;STAT3;ARF6;CNOT11;FHL1;LAMTOR1;LIG3;MX2;NUP62;PSME2;STAMBP;TBRG4;THBS1;TMOD3;AGO4;NASP;RHEB;MSH6;STAG2;TOP2A;ACTR3;CDC5L;PRKDC;SMC1A;TOP2B;TPX2;H2AFY;IPO5;KIF11;KIF4A;KIFC1;MED1;MISP;PDS5B;RPRD1B;SEPT2;SEPT8;SMC2;TERF2;CDC23;CLIC1;EED;EMD;EZR
GO:0046950	cellular ketone body metabolic process	http://amigo.geneontology.org/amigo/term/GO:0046950	11	3	0.172979	17.3431	0.000578102	0.0238747	622;56898;79611	geneontology_Biological_Process	BDH1;ACSS3;BDH2
GO:0002730	regulation of dendritic cell cytokine production	http://amigo.geneontology.org/amigo/term/GO:0002730	11	3	0.172979	17.3431	0.000578102	0.0238747	1653;9188;23586	geneontology_Biological_Process	DDX1;DDX58;DDX21
GO:0006265	DNA topological change	http://amigo.geneontology.org/amigo/term/GO:0006265	11	3	0.172979	17.3431	0.000578102	0.0238747	7150;7153;7155	geneontology_Biological_Process	TOP1;TOP2A;TOP2B
GO:0042023	DNA endoreduplication	http://amigo.geneontology.org/amigo/term/GO:0042023	11	3	0.172979	17.3431	0.000578102	0.0238747	2956;8243;10735	geneontology_Biological_Process	MSH6;STAG2;SMC1A
GO:0030194	positive regulation of blood coagulation	http://amigo.geneontology.org/amigo/term/GO:0030194	25	4	0.393135	10.1746	0.000583444	0.0238747	2147;5340;5345;7057	geneontology_Biological_Process	PLG;THBS1;SERPINF2;F2
GO:1900048	positive regulation of hemostasis	http://amigo.geneontology.org/amigo/term/GO:1900048	25	4	0.393135	10.1746	0.000583444	0.0238747	2147;5340;5345;7057	geneontology_Biological_Process	PLG;THBS1;SERPINF2;F2
GO:0006379	mRNA cleavage	http://amigo.geneontology.org/amigo/term/GO:0006379	25	4	0.393135	10.1746	0.000583444	0.0238747	22916;26523;192669;192670	geneontology_Biological_Process	AGO3;AGO1;AGO4;NCBP2
GO:0009123	nucleoside monophosphate metabolic process	http://amigo.geneontology.org/amigo/term/GO:0009123	321	14	5.04785	2.77346	0.000588981	0.0240142	226;471;523;1841;1854;2584;3098;3939;4705;5315;6774;10165;50808;55967	geneontology_Biological_Process	PKM;LDHA;STAT3;ALDOA;ATIC;DUT;GALK1;HK1;NDUFA10;AK3;ATP6V1A;NDUFA12;SLC25A13;DTYMK
GO:0006888	ER to Golgi vesicle-mediated transport	http://amigo.geneontology.org/amigo/term/GO:0006888	214	11	3.36524	3.26872	0.000595441	0.0241903	372;2147;3998;8775;10466;10960;22818;22820;26958;81876;84364	geneontology_Biological_Process	COPG1;LMAN2;COPZ1;LMAN1;NAPA;RAB1B;ARCN1;ARFGAP2;COG5;COPG2;F2
GO:0003682	chromatin binding	http://amigo.geneontology.org/amigo/term/GO:0003682	520	19	8.17721	2.32353	0.000605614	0.0245154	1653;1786;2956;2962;5469;6294;6742;6774;7150;7153;7155;8243;8726;9555;10735;23636;27000;53615;79892	geneontology_Molecular_Function	MCMBP;STAT3;DDX1;NUP62;MSH6;SAFB;SSBP1;STAG2;TOP1;TOP2A;GTF2F1;MBD3;SMC1A;TOP2B;DNAJC2;H2AFY;MED1;DNMT1;EED
hsa00970	Aminoacyl-tRNA biosynthesis	http://www.kegg.jp/kegg-bin/show_pathway?hsa00970+10056+16+23395+57038+79731	44	5	0.691917	7.2263	0.000610093	0.0246086	10056;16;23395;57038;79731	pathway_KEGG	NARS2;RARS2;FARSB;LARS2;AARS
GO:0004252	serine-type endopeptidase activity	http://amigo.geneontology.org/amigo/term/GO:0004252	182	10	2.86202	3.49403	0.000627757	0.0252309	629;713;714;715;716;1508;2147;4312;5199;5340	geneontology_Molecular_Function	MMP1;C1QC;CFP;PLG;C1QB;C1S;C1R;CFB;CTSB;F2
GO:0071495	cellular response to endogenous stimulus	http://amigo.geneontology.org/amigo/term/GO:0071495	1347	37	21.1821	1.74676	0.000634791	0.0254231	197;301;335;382;523;839;857;988;999;1508;1786;2729;2730;2962;3843;4035;5315;5469;5576;5591;5905;6294;6774;7057;7123;7430;8243;8886;9131;9296;9667;22916;23636;51606;54464;55004;57530	geneontology_Biological_Process	PKM;ANXA1;STAT3;ARF6;CASP6;CAV1;CDH1;CGN;GCLC;GCLM;LAMTOR1;LRP1;NUP62;PRKAR2A;RANGAP1;THBS1;AHSG;AIFM1;APOA1;SAFB2;SAFB;CDC5L;GTF2F1;NCBP2;PRKDC;SMC1A;ATP6V1A;ATP6V1F;CLEC3B;IPO5;MED1;XRN1;ATP6V1H;CTSB;DDX18;DNMT1;EZR
GO:0007584	response to nutrient	http://amigo.geneontology.org/amigo/term/GO:0007584	216	11	3.39669	3.23845	0.000643285	0.0256723	178;191;335;2729;2730;3939;5315;5469;8854;8942;9131	geneontology_Biological_Process	PKM;LDHA;GCLC;GCLM;KYNU;AGL;AIFM1;ALDH1A2;APOA1;MED1;AHCY
GO:0006418	tRNA aminoacylation for protein translation	http://amigo.geneontology.org/amigo/term/GO:0006418	45	5	0.707643	7.06571	0.000677638	0.0264327	16;10056;23395;57038;79731	geneontology_Biological_Process	NARS2;RARS2;FARSB;LARS2;AARS
GO:0061615	glycolytic process through fructose-6-phosphate	http://amigo.geneontology.org/amigo/term/GO:0061615	26	4	0.40886	9.78329	0.000681061	0.0264327	226;2584;3098;5315	geneontology_Biological_Process	PKM;ALDOA;GALK1;HK1
GO:0061620	glycolytic process through glucose-6-phosphate	http://amigo.geneontology.org/amigo/term/GO:0061620	26	4	0.40886	9.78329	0.000681061	0.0264327	226;2584;3098;5315	geneontology_Biological_Process	PKM;ALDOA;GALK1;HK1
GO:0050820	positive regulation of coagulation	http://amigo.geneontology.org/amigo/term/GO:0050820	26	4	0.40886	9.78329	0.000681061	0.0264327	2147;5340;5345;7057	geneontology_Biological_Process	PLG;THBS1;SERPINF2;F2
GO:0071813	lipoprotein particle binding	http://amigo.geneontology.org/amigo/term/GO:0071813	26	4	0.40886	9.78329	0.000681061	0.0264327	335;348;7057;23780	geneontology_Molecular_Function	APOE;APOL2;THBS1;APOA1
GO:0071814	protein-lipid complex binding	http://amigo.geneontology.org/amigo/term/GO:0071814	26	4	0.40886	9.78329	0.000681061	0.0264327	335;348;7057;23780	geneontology_Molecular_Function	APOE;APOL2;THBS1;APOA1
GO:0016628	oxidoreductase activity, acting on the CH-CH group of donors, NAD or NADP as acceptor	http://amigo.geneontology.org/amigo/term/GO:0016628	26	4	0.40886	9.78329	0.000681061	0.0264327	644;645;26063;56898	geneontology_Molecular_Function	BLVRB;BDH2;DECR2;BLVRA
GO:0016405	CoA-ligase activity	http://amigo.geneontology.org/amigo/term/GO:0016405	26	4	0.40886	9.78329	0.000681061	0.0264327	51703;55902;79611;197322	geneontology_Molecular_Function	ACSL5;ACSS2;ACSF3;ACSS3
hsa04145	Phagosome	http://www.kegg.jp/kegg-bin/show_pathway?hsa04145+3105+3106+3107+3122+51606+523+7057+715+9296	152	9	2.39026	3.76528	0.0006843	0.0264674	3105;3106;3107;3122;51606;523;7057;715;9296	pathway_KEGG	HLA-A;HLA-B;HLA-C;THBS1;ATP6V1A;ATP6V1F;HLA-DRA;ATP6V1H;C1R
hsa00010	Glycolysis / Gluconeogenesis	http://www.kegg.jp/kegg-bin/show_pathway?hsa00010+219+226+3098+3939+5315+55902	68	6	1.06933	5.61101	0.000693069	0.0267151	219;226;3098;3939;5315;55902	pathway_KEGG	PKM;LDHA;ACSS2;ALDOA;HK1;ALDH1B1
GO:0006165	nucleoside diphosphate phosphorylation	http://amigo.geneontology.org/amigo/term/GO:0006165	94	7	1.47819	4.73553	0.000703813	0.027037	226;1841;2584;3098;3939;5315;6774	geneontology_Biological_Process	PKM;LDHA;STAT3;ALDOA;GALK1;HK1;DTYMK
GO:1903047	mitotic cell cycle process	http://amigo.geneontology.org/amigo/term/GO:1903047	788	25	12.3916	2.01749	0.000710131	0.0271872	301;2010;2273;2956;3832;3833;4678;4735;5591;5721;7153;7155;8243;8697;9555;10592;10617;10735;22974;23047;23176;23636;24137;29766;55571	geneontology_Biological_Process	ANXA1;CNOT11;FHL1;NUP62;PSME2;STAMBP;TMOD3;NASP;MSH6;STAG2;TOP2A;PRKDC;SMC1A;TOP2B;TPX2;H2AFY;KIF11;KIF4A;KIFC1;PDS5B;SEPT2;SEPT8;SMC2;CDC23;EMD
GO:0009156	ribonucleoside monophosphate biosynthetic process	http://amigo.geneontology.org/amigo/term/GO:0009156	153	9	2.40599	3.74067	0.000717269	0.0273677	226;471;2584;3098;3939;5315;6774;10165;50808	geneontology_Biological_Process	PKM;LDHA;STAT3;ALDOA;ATIC;GALK1;HK1;AK3;SLC25A13
GO:1902224	ketone body metabolic process	http://amigo.geneontology.org/amigo/term/GO:1902224	12	3	0.188705	15.8978	0.000761862	0.028874	622;56898;79611	geneontology_Biological_Process	BDH1;ACSS3;BDH2
GO:0004859	phospholipase inhibitor activity	http://amigo.geneontology.org/amigo/term/GO:0004859	12	3	0.188705	15.8978	0.000761862	0.028874	301;306;307	geneontology_Molecular_Function	ANXA1;ANXA4;ANXA3
GO:0097066	response to thyroid hormone	http://amigo.geneontology.org/amigo/term/GO:0097066	27	4	0.424586	9.42095	0.000789698	0.0298289	1508;2729;2730;5469	geneontology_Biological_Process	GCLC;GCLM;MED1;CTSB
GO:0046939	nucleotide phosphorylation	http://amigo.geneontology.org/amigo/term/GO:0046939	96	7	1.50964	4.63687	0.000798073	0.0300448	226;1841;2584;3098;3939;5315;6774	geneontology_Biological_Process	PKM;LDHA;STAT3;ALDOA;GALK1;HK1;DTYMK
GO:0006953	acute-phase response	http://amigo.geneontology.org/amigo/term/GO:0006953	47	5	0.739094	6.76504	0.000829325	0.0311176	197;2147;5345;6774;23780	geneontology_Biological_Process	STAT3;APOL2;AHSG;SERPINF2;F2
GO:0032940	secretion by cell	http://amigo.geneontology.org/amigo/term/GO:0032940	1472	39	23.1478	1.68483	0.000895674	0.0331925	18;178;197;213;226;292;293;301;306;307;335;710;727;823;1508;2243;3098;3608;3827;5199;5315;5340;5345;7018;7057;7123;7430;8027;8775;8907;9961;10565;22820;23586;26958;55004;64005;91942;139322	geneontology_Biological_Process	COPG1;PKM;ANXA1;SLC25A5;SLC25A6;ALDOA;ANXA4;APOOL;C5;CFP;DDX58;FGA;HK1;LAMTOR1;NAPA;PLG;SERPING1;THBS1;AGL;AHSG;ANXA3;APOA1;ARFGEF1;CAPN1;MVP;ABAT;CLEC3B;ILF2;KNG1;MYO1G;NDUFAF2;SERPINF2;STAM;TF;ALB;AP1M1;COPG2;CTSB;EZR
GO:0009135	purine nucleoside diphosphate metabolic process	http://amigo.geneontology.org/amigo/term/GO:0009135	98	7	1.54109	4.54224	0.000902038	0.0331925	226;2584;3098;3939;5315;6774;50808	geneontology_Biological_Process	PKM;LDHA;STAT3;ALDOA;GALK1;HK1;AK3
GO:0009179	purine ribonucleoside diphosphate metabolic process	http://amigo.geneontology.org/amigo/term/GO:0009179	98	7	1.54109	4.54224	0.000902038	0.0331925	226;2584;3098;3939;5315;6774;50808	geneontology_Biological_Process	PKM;LDHA;STAT3;ALDOA;GALK1;HK1;AK3
GO:0072329	monocarboxylic acid catabolic process	http://amigo.geneontology.org/amigo/term/GO:0072329	127	8	1.99713	4.00576	0.000903147	0.0331925	18;2110;2639;10005;10449;26063;51084;56898	geneontology_Biological_Process	ACAA2;ETFDH;GCDH;BDH2;ACOT8;CRYL1;DECR2;ABAT
GO:0072378	blood coagulation, fibrin clot formation	http://amigo.geneontology.org/amigo/term/GO:0072378	28	4	0.440311	9.08449	0.000910017	0.0331925	710;2147;2243;3827	geneontology_Biological_Process	FGA;SERPING1;KNG1;F2
GO:0007263	nitric oxide mediated signal transduction	http://amigo.geneontology.org/amigo/term/GO:0007263	28	4	0.440311	9.08449	0.000910017	0.0331925	348;7057;23564;23576	geneontology_Biological_Process	APOE;DDAH2;DDAH1;THBS1
GO:0006575	cellular modified amino acid metabolic process	http://amigo.geneontology.org/amigo/term/GO:0006575	191	10	3.00355	3.32939	0.000910423	0.0331925	191;471;2729;2730;2938;5351;5469;55349;79017;84245	geneontology_Biological_Process	CHDH;PLOD1;ATIC;GCLC;GCLM;GSTA1;GGCT;MRI1;MED1;AHCY
GO:0043039	tRNA aminoacylation	http://amigo.geneontology.org/amigo/term/GO:0043039	48	5	0.754819	6.6241	0.000914015	0.0331925	16;10056;23395;57038;79731	geneontology_Biological_Process	NARS2;RARS2;FARSB;LARS2;AARS
GO:0003724	RNA helicase activity	http://amigo.geneontology.org/amigo/term/GO:0003724	48	5	0.754819	6.6241	0.000914015	0.0331925	1653;1974;8886;9188;57062	geneontology_Molecular_Function	EIF4A2;DDX1;DDX24;DDX21;DDX18
hsa00520	Amino sugar and nucleotide sugar metabolism	http://www.kegg.jp/kegg-bin/show_pathway?hsa00520+2584+3098+5238+55577+7358	48	5	0.754819	6.6241	0.000914015	0.0331925	2584;3098;5238;55577;7358	pathway_KEGG	GALK1;HK1;NAGK;PGM3;UGDH
GO:0006635	fatty acid beta-oxidation	http://amigo.geneontology.org/amigo/term/GO:0006635	72	6	1.13223	5.29928	0.000938943	0.0339885	2110;2639;10005;10449;26063;56898	geneontology_Biological_Process	ACAA2;ETFDH;GCDH;BDH2;ACOT8;DECR2
GO:0051301	cell division	http://amigo.geneontology.org/amigo/term/GO:0051301	583	20	9.16791	2.18152	0.000954916	0.0344563	382;3832;3833;3980;4735;7150;7153;8243;8697;10096;10592;10617;10735;22974;23047;23176;23636;24137;79892;126353	geneontology_Biological_Process	MCMBP;ARF6;LIG3;NUP62;STAMBP;STAG2;TOP1;TOP2A;ACTR3;SMC1A;TPX2;KIF11;KIF4A;KIFC1;MISP;PDS5B;SEPT2;SEPT8;SMC2;CDC23
GO:0034433	steroid esterification	http://amigo.geneontology.org/amigo/term/GO:0034433	13	3	0.20443	14.6749	0.000978941	0.0346588	335;348;55004	geneontology_Biological_Process	APOE;LAMTOR1;APOA1
GO:0034434	sterol esterification	http://amigo.geneontology.org/amigo/term/GO:0034434	13	3	0.20443	14.6749	0.000978941	0.0346588	335;348;55004	geneontology_Biological_Process	APOE;LAMTOR1;APOA1
GO:0034435	cholesterol esterification	http://amigo.geneontology.org/amigo/term/GO:0034435	13	3	0.20443	14.6749	0.000978941	0.0346588	335;348;55004	geneontology_Biological_Process	APOE;LAMTOR1;APOA1
GO:0010755	regulation of plasminogen activation	http://amigo.geneontology.org/amigo/term/GO:0010755	13	3	0.20443	14.6749	0.000978941	0.0346588	5345;7057;7123	geneontology_Biological_Process	THBS1;CLEC3B;SERPINF2
GO:0034384	high-density lipoprotein particle clearance	http://amigo.geneontology.org/amigo/term/GO:0034384	13	3	0.20443	14.6749	0.000978941	0.0346588	335;348;3069	geneontology_Biological_Process	APOE;HDLBP;APOA1
GO:0002371	dendritic cell cytokine production	http://amigo.geneontology.org/amigo/term/GO:0002371	13	3	0.20443	14.6749	0.000978941	0.0346588	1653;9188;23586	geneontology_Biological_Process	DDX1;DDX58;DDX21
GO:0010243	response to organonitrogen compound	http://amigo.geneontology.org/amigo/term/GO:0010243	945	28	14.8605	1.88419	0.00098387	0.0347245	18;197;301;348;523;839;857;988;999;1786;2729;2730;3843;3939;4035;5315;5576;5591;5905;6774;7430;8942;9097;9131;9296;51606;54464;55004	geneontology_Biological_Process	PKM;ANXA1;APOE;LDHA;STAT3;CASP6;CAV1;CDH1;GCLC;GCLM;KYNU;LAMTOR1;LRP1;PRKAR2A;RANGAP1;USP14;AHSG;AIFM1;CDC5L;PRKDC;ABAT;ATP6V1A;ATP6V1F;IPO5;XRN1;ATP6V1H;DNMT1;EZR
GO:0048285	organelle fission	http://amigo.geneontology.org/amigo/term/GO:0048285	459	17	7.21796	2.35524	0.00100497	0.0352489	3832;3833;4600;7153;7155;8243;8697;9555;10005;10096;10592;10735;22974;23047;23636;24137;192670	geneontology_Biological_Process	MX2;NUP62;AGO4;STAG2;TOP2A;ACOT8;ACTR3;SMC1A;TOP2B;TPX2;H2AFY;KIF11;KIF4A;KIFC1;PDS5B;SMC2;CDC23
GO:0043038	amino acid activation	http://amigo.geneontology.org/amigo/term/GO:0043038	49	5	0.770544	6.48892	0.00100497	0.0352489	16;10056;23395;57038;79731	geneontology_Biological_Process	NARS2;RARS2;FARSB;LARS2;AARS
GO:0009185	ribonucleoside diphosphate metabolic process	http://amigo.geneontology.org/amigo/term/GO:0009185	100	7	1.57254	4.4514	0.0010164	0.0355392	226;2584;3098;3939;5315;6774;50808	geneontology_Biological_Process	PKM;LDHA;STAT3;ALDOA;GALK1;HK1;AK3
GO:0009201	ribonucleoside triphosphate biosynthetic process	http://amigo.geneontology.org/amigo/term/GO:0009201	130	8	2.0443	3.91332	0.00105118	0.0365293	226;1503;2584;3098;3939;5315;6774;10165	geneontology_Biological_Process	PKM;LDHA;STAT3;ALDOA;GALK1;HK1;CTPS1;SLC25A13
GO:0016614	oxidoreductase activity, acting on CH-OH group of donors	http://amigo.geneontology.org/amigo/term/GO:0016614	130	8	2.0443	3.91332	0.00105118	0.0365293	622;3028;3939;6697;7358;51084;55349;56898	geneontology_Molecular_Function	BDH1;CHDH;LDHA;HSD17B10;BDH2;CRYL1;SPR;UGDH
GO:0007568	aging	http://amigo.geneontology.org/amigo/term/GO:0007568	303	13	4.7648	2.72834	0.00106568	0.0368136	18;710;2729;2730;2956;4035;4791;5591;6774;7014;8942;23636;53615	geneontology_Biological_Process	NFKB2;STAT3;GCLC;GCLM;KYNU;LRP1;NUP62;SERPING1;MSH6;MBD3;PRKDC;ABAT;TERF2
GO:0008234	cysteine-type peptidase activity	http://amigo.geneontology.org/amigo/term/GO:0008234	195	10	3.06645	3.2611	0.00106588	0.0368136	823;826;839;1508;2923;7874;8295;9097;10617;23192	geneontology_Molecular_Function	CASP6;PDIA3;STAMBP;USP14;USP7;CAPN1;CAPNS1;ATG4B;TRRAP;CTSB
GO:0048029	monosaccharide binding	http://amigo.geneontology.org/amigo/term/GO:0048029	74	6	1.16368	5.15606	0.0010846	0.0373461	226;2584;3098;3998;5351;10960	geneontology_Molecular_Function	LMAN2;PLOD1;ALDOA;GALK1;HK1;LMAN1
GO:0006637	acyl-CoA metabolic process	http://amigo.geneontology.org/amigo/term/GO:0006637	102	7	1.60399	4.36412	0.00114186	0.0390792	2639;8942;10005;26027;51703;55902;197322	geneontology_Biological_Process	ACSL5;ACSS2;GCDH;KYNU;ACOT11;ACSF3;ACOT8
GO:0035383	thioester metabolic process	http://amigo.geneontology.org/amigo/term/GO:0035383	102	7	1.60399	4.36412	0.00114186	0.0390792	2639;8942;10005;26027;51703;55902;197322	geneontology_Biological_Process	ACSL5;ACSS2;GCDH;KYNU;ACOT11;ACSF3;ACOT8
GO:0035198	miRNA binding	http://amigo.geneontology.org/amigo/term/GO:0035198	30	4	0.471762	8.47885	0.00118836	0.0404256	9188;26523;192669;192670	geneontology_Molecular_Function	AGO3;AGO1;AGO4;DDX21
GO:0016878	acid-thiol ligase activity	http://amigo.geneontology.org/amigo/term/GO:0016878	30	4	0.471762	8.47885	0.00118836	0.0404256	51703;55902;79611;197322	geneontology_Molecular_Function	ACSL5;ACSS2;ACSF3;ACSS3
GO:0006096	glycolytic process	http://amigo.geneontology.org/amigo/term/GO:0006096	76	6	1.19513	5.02037	0.001247	0.0421666	226;2584;3098;3939;5315;6774	geneontology_Biological_Process	PKM;LDHA;STAT3;ALDOA;GALK1;HK1
GO:0009064	glutamine family amino acid metabolic process	http://amigo.geneontology.org/amigo/term/GO:0009064	76	6	1.19513	5.02037	0.001247	0.0421666	1503;2729;2730;5832;23564;23576	geneontology_Biological_Process	DDAH2;DDAH1;GCLC;GCLM;CTPS1;ALDH18A1
GO:0009725	response to hormone	http://amigo.geneontology.org/amigo/term/GO:0009725	962	28	15.1278	1.85089	0.00128455	0.0433065	178;197;301;306;523;857;988;1508;2729;2730;4678;5315;5469;5576;5591;5905;6294;6774;7057;8854;8886;9131;9296;9667;23636;51606;53615;54464	geneontology_Biological_Process	PKM;ANXA1;STAT3;CAV1;GCLC;GCLM;NUP62;PRKAR2A;RANGAP1;THBS1;AGL;AHSG;AIFM1;ALDH1A2;ANXA3;NASP;SAFB2;SAFB;CDC5L;MBD3;PRKDC;ATP6V1A;ATP6V1F;MED1;XRN1;ATP6V1H;CTSB;DDX18
GO:0009611	response to wounding	http://amigo.geneontology.org/amigo/term/GO:0009611	642	21	10.0957	2.08009	0.00129912	0.0436673	18;301;335;348;710;857;1192;2147;2243;3827;3998;5315;5340;5345;5576;5905;6416;7057;7448;10565;50808	geneontology_Biological_Process	PKM;ANXA1;APOE;CAV1;FGA;LMAN1;MAP2K4;PLG;PRKAR2A;RANGAP1;SERPING1;THBS1;VTN;APOA1;ARFGEF1;ABAT;AK3;KNG1;SERPINF2;CLIC1;F2
GO:0090329	regulation of DNA-dependent DNA replication	http://amigo.geneontology.org/amigo/term/GO:0090329	52	5	0.817721	6.11456	0.0013183	0.0441807	2956;3980;7014;8243;10735	geneontology_Biological_Process	LIG3;MSH6;STAG2;SMC1A;TERF2
GO:0046903	secretion	http://amigo.geneontology.org/amigo/term/GO:0046903	1605	41	25.2393	1.62445	0.00132605	0.0443088	18;178;197;213;226;292;293;301;306;307;335;710;727;823;857;1508;2243;3098;3608;3827;5199;5315;5340;5345;5469;7018;7057;7123;7430;8027;8775;8907;9961;10565;22820;23586;26958;55004;64005;91942;139322	geneontology_Biological_Process	COPG1;PKM;ANXA1;SLC25A5;SLC25A6;ALDOA;ANXA4;APOOL;C5;CAV1;CFP;DDX58;FGA;HK1;LAMTOR1;NAPA;PLG;SERPING1;THBS1;AGL;AHSG;ANXA3;APOA1;ARFGEF1;CAPN1;MVP;ABAT;CLEC3B;ILF2;KNG1;MED1;MYO1G;NDUFAF2;SERPINF2;STAM;TF;ALB;AP1M1;COPG2;CTSB;EZR
GO:0006757	ATP generation from ADP	http://amigo.geneontology.org/amigo/term/GO:0006757	77	6	1.21086	4.95517	0.00133486	0.0444717	226;2584;3098;3939;5315;6774	geneontology_Biological_Process	PKM;LDHA;STAT3;ALDOA;GALK1;HK1
GO:0032102	negative regulation of response to external stimulus	http://amigo.geneontology.org/amigo/term/GO:0032102	312	13	4.90632	2.64964	0.00138704	0.0460343	18;335;348;710;727;2147;2243;3827;4925;5340;5345;7057;7448	geneontology_Biological_Process	APOE;C5;FGA;NUCB2;PLG;SERPING1;THBS1;VTN;APOA1;ABAT;KNG1;SERPINF2;F2
GO:0016458	gene silencing	http://amigo.geneontology.org/amigo/term/GO:0016458	202	10	3.17653	3.14809	0.00138992	0.0460343	1786;6774;8726;9555;22916;26523;53615;55571;192669;192670	geneontology_Biological_Process	AGO3;STAT3;AGO1;CNOT11;AGO4;MBD3;NCBP2;H2AFY;DNMT1;EED
GO:0031100	animal organ regeneration	http://amigo.geneontology.org/amigo/term/GO:0031100	78	6	1.22658	4.89165	0.00142737	0.0471366	306;335;471;5315;5469;7448	geneontology_Biological_Process	PKM;ATIC;VTN;ANXA3;APOA1;MED1
GO:0009894	regulation of catabolic process	http://amigo.geneontology.org/amigo/term/GO:0009894	875	26	13.7597	1.88957	0.00143246	0.0471668	348;523;722;823;826;857;999;2729;3428;4035;5721;6009;6774;7430;7874;9097;9131;9238;10128;23192;23589;51606;54464;55004;81876;151636	geneontology_Biological_Process	APOE;IFI16;STAT3;CAV1;CDH1;DTX3L;GCLC;LAMTOR1;LRP1;PSME2;RAB1B;TBRG4;USP14;USP7;AIFM1;C4BPA;CAPN1;CAPNS1;CARHSP1;RHEB;LRPPRC;ATG4B;ATP6V1A;XRN1;ATP6V1H;EZR
GO:0045055	regulated exocytosis	http://amigo.geneontology.org/amigo/term/GO:0045055	783	24	12.313	1.94916	0.00144507	0.0474436	178;197;213;226;306;335;710;823;1508;2243;3608;3827;5199;5315;5340;5345;7018;7057;7123;8775;8907;9961;55004;139322	geneontology_Biological_Process	PKM;ALDOA;APOOL;CFP;FGA;LAMTOR1;NAPA;PLG;SERPING1;THBS1;AGL;AHSG;ANXA3;APOA1;CAPN1;MVP;CLEC3B;ILF2;KNG1;SERPINF2;TF;ALB;AP1M1;CTSB
GO:0002700	regulation of production of molecular mediator of immune response	http://amigo.geneontology.org/amigo/term/GO:0002700	137	8	2.15438	3.71337	0.00147255	0.0482059	335;1653;2956;3098;5591;6778;9188;23586	geneontology_Biological_Process	DDX1;DDX58;HK1;APOA1;MSH6;PRKDC;DDX21;STAT6
GO:0008236	serine-type peptidase activity	http://amigo.geneontology.org/amigo/term/GO:0008236	204	10	3.20798	3.11723	0.00149593	0.0487813	629;713;714;715;716;1508;2147;4312;5199;5340	geneontology_Molecular_Function	MMP1;C1QC;CFP;PLG;C1QB;C1S;C1R;CFB;CTSB;F2
GO:0051817	modification of morphology or physiology of other organism involved in symbiotic interaction	http://amigo.geneontology.org/amigo/term/GO:0051817	107	7	1.68262	4.16018	0.00150896	0.0487813	213;293;348;735;2147;5340;10318	geneontology_Biological_Process	APOE;SLC25A6;TNIP1;PLG;C9;ALB;F2
GO:0031054	pre-miRNA processing	http://amigo.geneontology.org/amigo/term/GO:0031054	15	3	0.235881	12.7183	0.00152155	0.0487813	26523;192669;192670	geneontology_Biological_Process	AGO3;AGO1;AGO4
GO:0035729	cellular response to hepatocyte growth factor stimulus	http://amigo.geneontology.org/amigo/term/GO:0035729	15	3	0.235881	12.7183	0.00152155	0.0487813	2729;2730;5469	geneontology_Biological_Process	GCLC;GCLM;MED1
GO:0035635	entry of bacterium into host cell	http://amigo.geneontology.org/amigo/term/GO:0035635	15	3	0.235881	12.7183	0.00152155	0.0487813	857;999;1500	geneontology_Biological_Process	CTNND1;CAV1;CDH1
GO:0000963	mitochondrial RNA processing	http://amigo.geneontology.org/amigo/term/GO:0000963	15	3	0.235881	12.7183	0.00152155	0.0487813	3028;9238;51095	geneontology_Biological_Process	HSD17B10;TBRG4;TRNT1
GO:0043395	heparan sulfate proteoglycan binding	http://amigo.geneontology.org/amigo/term/GO:0043395	15	3	0.235881	12.7183	0.00152155	0.0487813	348;3075;4035	geneontology_Molecular_Function	APOE;LRP1;CFH
GO:1900182	positive regulation of protein localization to nucleus	http://amigo.geneontology.org/amigo/term/GO:1900182	79	6	1.24231	4.82973	0.00152469	0.0487813	999;2147;3843;5469;83666;151636	geneontology_Biological_Process	CDH1;DTX3L;PARP9;IPO5;MED1;F2
GO:0042866	pyruvate biosynthetic process	http://amigo.geneontology.org/amigo/term/GO:0042866	80	6	1.25803	4.76935	0.00162697	0.0519068	226;2584;3098;3939;5315;6774	geneontology_Biological_Process	PKM;LDHA;STAT3;ALDOA;GALK1;HK1
GO:0070011	peptidase activity, acting on L-amino acid peptides	http://amigo.geneontology.org/amigo/term/GO:0070011	610	20	9.59249	2.08496	0.00164029	0.0521844	629;713;714;715;716;823;826;839;1508;2147;2923;4312;5199;5340;7874;8295;9097;10617;23192;84301	geneontology_Molecular_Function	MMP1;C1QC;CASP6;CFP;PDIA3;PLG;STAMBP;USP14;USP7;C1QB;CAPN1;CAPNS1;ATG4B;C1S;TRRAP;C1R;CFB;CTSB;DDI2;F2
GO:0007062	sister chromatid cohesion	http://amigo.geneontology.org/amigo/term/GO:0007062	55	5	0.864897	5.78104	0.00169842	0.0538817	8243;9555;10735;23047;79892	geneontology_Biological_Process	MCMBP;STAG2;SMC1A;H2AFY;PDS5B
GO:0017171	serine hydrolase activity	http://amigo.geneontology.org/amigo/term/GO:0017171	208	10	3.27088	3.05728	0.0017277	0.0546572	629;713;714;715;716;1508;2147;4312;5199;5340	geneontology_Molecular_Function	MMP1;C1QC;CFP;PLG;C1QB;C1S;C1R;CFB;CTSB;F2
GO:0043062	extracellular structure organization	http://amigo.geneontology.org/amigo/term/GO:0043062	400	15	6.29016	2.38468	0.00174273	0.0549789	213;335;348;822;999;2243;4035;4312;4791;5340;5345;5351;7057;7448;8027	geneontology_Biological_Process	NFKB2;MMP1;APOE;PLOD1;CDH1;FGA;LRP1;PLG;THBS1;VTN;APOA1;CAPG;SERPINF2;STAM;ALB
GO:0009199	ribonucleoside triphosphate metabolic process	http://amigo.geneontology.org/amigo/term/GO:0009199	283	12	4.45029	2.69646	0.00181356	0.057054	226;523;1503;2584;3098;3939;4705;5315;6774;10165;50808;55967	geneontology_Biological_Process	PKM;LDHA;STAT3;ALDOA;GALK1;HK1;CTPS1;NDUFA10;AK3;ATP6V1A;NDUFA12;SLC25A13
GO:0009166	nucleotide catabolic process	http://amigo.geneontology.org/amigo/term/GO:0009166	142	8	2.23301	3.58261	0.00184822	0.0574327	226;1854;2584;3098;3939;5315;6774;30833	geneontology_Biological_Process	PKM;LDHA;NT5C;STAT3;ALDOA;DUT;GALK1;HK1
GO:0034375	high-density lipoprotein particle remodeling	http://amigo.geneontology.org/amigo/term/GO:0034375	16	3	0.251606	11.9234	0.00185103	0.0574327	213;335;348	geneontology_Biological_Process	APOE;APOA1;ALB
GO:0016246	RNA interference	http://amigo.geneontology.org/amigo/term/GO:0016246	16	3	0.251606	11.9234	0.00185103	0.0574327	26523;192669;192670	geneontology_Biological_Process	AGO3;AGO1;AGO4
GO:0006750	glutathione biosynthetic process	http://amigo.geneontology.org/amigo/term/GO:0006750	16	3	0.251606	11.9234	0.00185103	0.0574327	2729;2730;79017	geneontology_Biological_Process	GCLC;GCLM;GGCT
GO:0043024	ribosomal small subunit binding	http://amigo.geneontology.org/amigo/term/GO:0043024	16	3	0.251606	11.9234	0.00185103	0.0574327	6059;7458;55037	geneontology_Molecular_Function	PTCD3;ABCE1;EIF4H
GO:0007052	mitotic spindle organization	http://amigo.geneontology.org/amigo/term/GO:0007052	111	7	1.74552	4.01027	0.00186403	0.0576776	3832;3833;8243;10735;22974;23636;24137	geneontology_Biological_Process	NUP62;STAG2;SMC1A;TPX2;KIF11;KIF4A;KIFC1
GO:0016620	oxidoreductase activity, acting on the aldehyde or oxo group of donors, NAD or NADP as acceptor	http://amigo.geneontology.org/amigo/term/GO:0016620	34	4	0.534664	7.48134	0.00191438	0.0590738	219;5832;8854;126133	geneontology_Molecular_Function	ALDH16A1;ALDH1A2;ALDH1B1;ALDH18A1
GO:0009167	purine ribonucleoside monophosphate metabolic process	http://amigo.geneontology.org/amigo/term/GO:0009167	285	12	4.48174	2.67753	0.00192311	0.0591814	226;471;523;2584;3098;3939;4705;5315;6774;10165;50808;55967	geneontology_Biological_Process	PKM;LDHA;STAT3;ALDOA;ATIC;GALK1;HK1;NDUFA10;AK3;ATP6V1A;NDUFA12;SLC25A13
GO:0042060	wound healing	http://amigo.geneontology.org/amigo/term/GO:0042060	532	18	8.36591	2.15159	0.00197617	0.0605983	18;301;348;710;857;1192;2147;2243;3827;3998;5315;5340;5345;5576;7057;7448;10565;50808	geneontology_Biological_Process	PKM;ANXA1;APOE;CAV1;FGA;LMAN1;PLG;PRKAR2A;SERPING1;THBS1;VTN;ARFGEF1;ABAT;AK3;KNG1;SERPINF2;CLIC1;F2
GO:0009126	purine nucleoside monophosphate metabolic process	http://amigo.geneontology.org/amigo/term/GO:0009126	286	12	4.49746	2.66817	0.00197988	0.0605983	226;471;523;2584;3098;3939;4705;5315;6774;10165;50808;55967	geneontology_Biological_Process	PKM;LDHA;STAT3;ALDOA;ATIC;GALK1;HK1;NDUFA10;AK3;ATP6V1A;NDUFA12;SLC25A13
GO:0006898	receptor-mediated endocytosis	http://amigo.geneontology.org/amigo/term/GO:0006898	287	12	4.51319	2.65887	0.00203802	0.0622093	213;259;335;348;382;857;3190;4035;7018;7430;7448;8542	geneontology_Biological_Process	APOE;ARF6;CAV1;HNRNPK;LRP1;VTN;AMBP;APOA1;APOL1;TF;ALB;EZR
GO:0048193	Golgi vesicle transport	http://amigo.geneontology.org/amigo/term/GO:0048193	366	14	5.7555	2.43246	0.00205043	0.0624193	372;2147;3832;3998;8775;10466;10960;22818;22820;24137;26958;57410;81876;84364	geneontology_Biological_Process	COPG1;LMAN2;COPZ1;LMAN1;NAPA;RAB1B;ARCN1;ARFGAP2;KIF11;KIF4A;SCYL1;COG5;COPG2;F2
GO:0016209	antioxidant activity	http://amigo.geneontology.org/amigo/term/GO:0016209	84	6	1.32093	4.54224	0.0020891	0.0634254	213;348;2878;2938;25824;493869	geneontology_Molecular_Function	APOE;PRDX5;GPX8;GSTA1;GPX3;ALB
GO:0051336	regulation of hydrolase activity	http://amigo.geneontology.org/amigo/term/GO:0051336	1240	33	19.4995	1.69235	0.00211298	0.0639787	197;259;301;335;392;397;710;727;857;2956;3428;3698;3827;3843;4035;5345;5721;5905;6059;6742;6774;7014;7057;7448;8775;9097;9131;10565;25824;27000;65264;84364;131118	geneontology_Biological_Process	ANXA1;IFI16;PRDX5;STAT3;ABCE1;C5;CAV1;ITIH2;LRP1;NAPA;PSME2;RANGAP1;SERPING1;THBS1;USP14;VTN;AHSG;AIFM1;AMBP;APOA1;ARFGAP2;ARFGEF1;ARHGDIB;MSH6;SSBP1;DNAJC19;DNAJC2;IPO5;KNG1;SERPINF2;TERF2;UBE2Z;ARHGAP1
GO:0006754	ATP biosynthetic process	http://amigo.geneontology.org/amigo/term/GO:0006754	114	7	1.7927	3.90473	0.0021704	0.0655414	226;2584;3098;3939;5315;6774;10165	geneontology_Biological_Process	PKM;LDHA;STAT3;ALDOA;GALK1;HK1;SLC25A13
GO:0006450	regulation of translational fidelity	http://amigo.geneontology.org/amigo/term/GO:0006450	17	3	0.267332	11.222	0.00222171	0.0663808	16;23395;51182	geneontology_Biological_Process	HSPA14;LARS2;AARS
GO:0006534	cysteine metabolic process	http://amigo.geneontology.org/amigo/term/GO:0006534	17	3	0.267332	11.222	0.00222171	0.0663808	2729;2730;84245	geneontology_Biological_Process	GCLC;GCLM;MRI1
GO:0051883	killing of cells in other organism involved in symbiotic interaction	http://amigo.geneontology.org/amigo/term/GO:0051883	17	3	0.267332	11.222	0.00222171	0.0663808	213;735;2147	geneontology_Biological_Process	C9;ALB;F2
GO:0035728	response to hepatocyte growth factor	http://amigo.geneontology.org/amigo/term/GO:0035728	17	3	0.267332	11.222	0.00222171	0.0663808	2729;2730;5469	geneontology_Biological_Process	GCLC;GCLM;MED1
GO:0031329	regulation of cellular catabolic process	http://amigo.geneontology.org/amigo/term/GO:0031329	764	23	12.0142	1.9144	0.00227346	0.0677479	348;523;823;826;857;2729;3428;4035;5721;6009;6774;7430;7874;9097;9131;9238;10128;23589;51606;54464;55004;81876;151636	geneontology_Biological_Process	APOE;IFI16;STAT3;CAV1;DTX3L;GCLC;LAMTOR1;LRP1;PSME2;RAB1B;TBRG4;USP14;USP7;AIFM1;CAPN1;CAPNS1;CARHSP1;RHEB;LRPPRC;ATP6V1A;XRN1;ATP6V1H;EZR
GO:0019637	organophosphate metabolic process	http://amigo.geneontology.org/amigo/term/GO:0019637	1148	31	18.0528	1.71719	0.00231294	0.068743	226;335;471;523;1503;1841;1854;2584;2639;3098;3939;4705;5238;5315;6774;7086;8760;8942;10005;10165;23475;26027;30833;50808;51084;51703;55750;55902;55967;83666;197322	geneontology_Biological_Process	PKM;ACSL5;LDHA;NT5C;STAT3;ACSS2;ALDOA;ATIC;DUT;GALK1;GCDH;HK1;KYNU;PARP9;PGM3;QPRT;ACOT11;ACSF3;AGK;APOA1;ACOT8;CRYL1;CTPS1;NDUFA10;AK3;ATP6V1A;NDUFA12;SLC25A13;TKT;CDS2;DTYMK
GO:0033013	tetrapyrrole metabolic process	http://amigo.geneontology.org/amigo/term/GO:0033013	59	5	0.927798	5.3891	0.00232298	0.0688603	259;644;645;7389;56898	geneontology_Biological_Process	BLVRB;AMBP;BDH2;UROD;BLVRA
GO:0006897	endocytosis	http://amigo.geneontology.org/amigo/term/GO:0006897	675	21	10.6146	1.9784	0.00237955	0.0693347	197;213;259;301;306;335;348;382;722;857;3190;4035;7018;7057;7430;7448;8542;10096;10960;51606;64005	geneontology_Biological_Process	ANXA1;APOE;LMAN2;ARF6;CAV1;HNRNPK;LRP1;THBS1;VTN;AHSG;AMBP;ANXA3;APOA1;APOL1;C4BPA;ACTR3;MYO1G;TF;ALB;ATP6V1H;EZR
GO:0015853	adenine transport	http://amigo.geneontology.org/amigo/term/GO:0015853	5	2	0.078627	25.4366	0.0023881	0.0693347	292;293	geneontology_Biological_Process	SLC25A5;SLC25A6
GO:0060353	regulation of cell adhesion molecule production	http://amigo.geneontology.org/amigo/term/GO:0060353	5	2	0.078627	25.4366	0.0023881	0.0693347	335;857	geneontology_Biological_Process	CAV1;APOA1
GO:2000646	positive regulation of receptor catabolic process	http://amigo.geneontology.org/amigo/term/GO:2000646	5	2	0.078627	25.4366	0.0023881	0.0693347	348;151636	geneontology_Biological_Process	APOE;DTX3L
GO:0000965	mitochondrial RNA 3'-end processing	http://amigo.geneontology.org/amigo/term/GO:0000965	5	2	0.078627	25.4366	0.0023881	0.0693347	3028;51095	geneontology_Biological_Process	HSD17B10;TRNT1
GO:0046874	quinolinate metabolic process	http://amigo.geneontology.org/amigo/term/GO:0046874	5	2	0.078627	25.4366	0.0023881	0.0693347	8942;23475	geneontology_Biological_Process	KYNU;QPRT
GO:0060228	phosphatidylcholine-sterol O-acyltransferase activator activity	http://amigo.geneontology.org/amigo/term/GO:0060228	5	2	0.078627	25.4366	0.0023881	0.0693347	335;348	geneontology_Molecular_Function	APOE;APOA1
GO:0036033	mediator complex binding	http://amigo.geneontology.org/amigo/term/GO:0036033	5	2	0.078627	25.4366	0.0023881	0.0693347	5469;8243	geneontology_Molecular_Function	SMC1A;MED1
GO:1901292	nucleoside phosphate catabolic process	http://amigo.geneontology.org/amigo/term/GO:1901292	148	8	2.32736	3.43737	0.0023947	0.069348	226;1854;2584;3098;3939;5315;6774;30833	geneontology_Biological_Process	PKM;LDHA;NT5C;STAT3;ALDOA;DUT;GALK1;HK1
GO:0044272	sulfur compound biosynthetic process	http://amigo.geneontology.org/amigo/term/GO:0044272	182	9	2.86202	3.14463	0.00240135	0.0693628	2639;2729;2730;2938;51703;55902;79017;84245;197322	geneontology_Biological_Process	ACSL5;ACSS2;GCDH;GCLC;GCLM;GSTA1;ACSF3;GGCT;MRI1
GO:0060627	regulation of vesicle-mediated transport	http://amigo.geneontology.org/amigo/term/GO:0060627	499	17	7.84697	2.16644	0.00243655	0.0701999	197;301;348;382;392;722;857;2243;3190;4035;7018;7430;7448;8027;8775;10960;23176	geneontology_Biological_Process	ANXA1;APOE;LMAN2;ARF6;CAV1;FGA;HNRNPK;LRP1;NAPA;VTN;AHSG;C4BPA;SEPT8;STAM;TF;ARHGAP1;EZR
GO:1901615	organic hydroxy compound metabolic process	http://amigo.geneontology.org/amigo/term/GO:1901615	500	17	7.8627	2.16211	0.00248732	0.0711825	18;219;335;348;2584;2638;3069;3939;5469;6697;8542;8854;10005;10449;23780;29968;55902	geneontology_Biological_Process	APOE;LDHA;ACAA2;ACSS2;APOL2;GALK1;GC;HDLBP;ALDH1A2;ALDH1B1;APOA1;APOL1;ACOT8;ABAT;MED1;PSAT1;SPR
GO:0006399	tRNA metabolic process	http://amigo.geneontology.org/amigo/term/GO:0006399	183	9	2.87775	3.12745	0.00249168	0.0711825	16;1653;3028;9097;10056;23395;51095;57038;79731	geneontology_Biological_Process	DDX1;HSD17B10;NARS2;RARS2;USP14;TRNT1;FARSB;LARS2;AARS
GO:0051049	regulation of transport	http://amigo.geneontology.org/amigo/term/GO:0051049	1765	43	27.7553	1.54925	0.00249711	0.0711825	18;197;292;293;301;306;307;335;348;382;392;722;727;823;857;999;1192;2010;2147;2243;2273;3098;3190;3843;3998;4035;4600;5469;5905;7018;7057;7430;7448;8027;8775;10449;10960;22916;23176;23586;23636;55004;91942	geneontology_Biological_Process	ANXA1;APOE;LMAN2;SLC25A5;SLC25A6;ACAA2;ANXA4;ARF6;C5;CAV1;CDH1;DDX58;FGA;FHL1;HK1;HNRNPK;LAMTOR1;LMAN1;LRP1;MX2;NAPA;NUP62;RANGAP1;THBS1;VTN;AHSG;ANXA3;APOA1;C4BPA;CAPN1;NCBP2;ABAT;IPO5;MED1;NDUFAF2;SEPT8;STAM;TF;ARHGAP1;CLIC1;EMD;EZR;F2
GO:0045815	positive regulation of gene expression, epigenetic	http://amigo.geneontology.org/amigo/term/GO:0045815	60	5	0.943524	5.29928	0.00250216	0.0711825	7913;9031;9188;9555;64425	geneontology_Biological_Process	POLR1E;DEK;DDX21;H2AFY;BAZ1B
GO:0006826	iron ion transport	http://amigo.geneontology.org/amigo/term/GO:0006826	60	5	0.943524	5.29928	0.00250216	0.0711825	392;523;7018;9296;51606	geneontology_Biological_Process	ATP6V1A;ATP6V1F;TF;ARHGAP1;ATP6V1H
GO:0008233	peptidase activity	http://amigo.geneontology.org/amigo/term/GO:0008233	634	20	9.9699	2.00604	0.00256483	0.072782	629;713;714;715;716;823;826;839;1508;2147;2923;4312;5199;5340;7874;8295;9097;10617;23192;84301	geneontology_Molecular_Function	MMP1;C1QC;CASP6;CFP;PDIA3;PLG;STAMBP;USP14;USP7;C1QB;CAPN1;CAPNS1;ATG4B;C1S;TRRAP;C1R;CFB;CTSB;DDI2;F2
GO:0034404	nucleobase-containing small molecule biosynthetic process	http://amigo.geneontology.org/amigo/term/GO:0034404	184	9	2.89347	3.11045	0.00258468	0.073127	226;1503;1854;2584;3098;3939;5315;6774;30833	geneontology_Biological_Process	PKM;LDHA;NT5C;STAT3;ALDOA;DUT;GALK1;HK1;CTPS1
GO:0010955	negative regulation of protein processing	http://amigo.geneontology.org/amigo/term/GO:0010955	37	4	0.58184	6.87475	0.00262765	0.073127	710;722;5345;7057	geneontology_Biological_Process	SERPING1;THBS1;C4BPA;SERPINF2
GO:1903318	negative regulation of protein maturation	http://amigo.geneontology.org/amigo/term/GO:1903318	37	4	0.58184	6.87475	0.00262765	0.073127	710;722;5345;7057	geneontology_Biological_Process	SERPING1;THBS1;C4BPA;SERPINF2
GO:0060236	regulation of mitotic spindle organization	http://amigo.geneontology.org/amigo/term/GO:0060236	37	4	0.58184	6.87475	0.00262765	0.073127	8243;10735;22974;23636	geneontology_Biological_Process	NUP62;STAG2;SMC1A;TPX2
GO:0061980	regulatory RNA binding	http://amigo.geneontology.org/amigo/term/GO:0061980	37	4	0.58184	6.87475	0.00262765	0.073127	9188;26523;192669;192670	geneontology_Molecular_Function	AGO3;AGO1;AGO4;DDX21
GO:0007597	blood coagulation, intrinsic pathway	http://amigo.geneontology.org/amigo/term/GO:0007597	18	3	0.283057	10.5986	0.00263527	0.073127	710;2147;3827	geneontology_Biological_Process	SERPING1;KNG1;F2
GO:0010544	negative regulation of platelet activation	http://amigo.geneontology.org/amigo/term/GO:0010544	18	3	0.283057	10.5986	0.00263527	0.073127	18;348;2147	geneontology_Biological_Process	APOE;ABAT;F2
GO:0051818	disruption of cells of other organism involved in symbiotic interaction	http://amigo.geneontology.org/amigo/term/GO:0051818	18	3	0.283057	10.5986	0.00263527	0.073127	213;735;2147	geneontology_Biological_Process	C9;ALB;F2
GO:0043649	dicarboxylic acid catabolic process	http://amigo.geneontology.org/amigo/term/GO:0043649	18	3	0.283057	10.5986	0.00263527	0.073127	10005;23475;197322	geneontology_Biological_Process	QPRT;ACSF3;ACOT8
GO:0016616	oxidoreductase activity, acting on the CH-OH group of donors, NAD or NADP as acceptor	http://amigo.geneontology.org/amigo/term/GO:0016616	119	7	1.87132	3.74067	0.00276585	0.0765625	622;3028;3939;6697;7358;51084;56898	geneontology_Molecular_Function	BDH1;LDHA;HSD17B10;BDH2;CRYL1;SPR;UGDH
GO:0000280	nuclear division	http://amigo.geneontology.org/amigo/term/GO:0000280	420	15	6.60467	2.27112	0.00277871	0.0767303	3832;3833;7153;7155;8243;8697;9555;10096;10592;10735;22974;23047;23636;24137;192670	geneontology_Biological_Process	NUP62;AGO4;STAG2;TOP2A;ACTR3;SMC1A;TOP2B;TPX2;H2AFY;KIF11;KIF4A;KIFC1;PDS5B;SMC2;CDC23
GO:0009161	ribonucleoside monophosphate metabolic process	http://amigo.geneontology.org/amigo/term/GO:0009161	299	12	4.70189	2.55216	0.00285163	0.0785521	226;471;523;2584;3098;3939;4705;5315;6774;10165;50808;55967	geneontology_Biological_Process	PKM;LDHA;STAT3;ALDOA;ATIC;GALK1;HK1;NDUFA10;AK3;ATP6V1A;NDUFA12;SLC25A13
GO:0097237	cellular response to toxic substance	http://amigo.geneontology.org/amigo/term/GO:0097237	223	10	3.50676	2.85163	0.00286892	0.0788361	213;301;348;2878;2938;6778;9131;25824;54464;493869	geneontology_Biological_Process	ANXA1;APOE;PRDX5;GPX8;GSTA1;AIFM1;GPX3;STAT6;XRN1;ALB
hsa05330	Allograft rejection	http://www.kegg.jp/kegg-bin/show_pathway?hsa05330+3105+3106+3107+3122	38	4	0.597565	6.69383	0.00290097	0.0795231	3105;3106;3107;3122	pathway_KEGG	HLA-A;HLA-B;HLA-C;HLA-DRA
GO:0051341	regulation of oxidoreductase activity	http://amigo.geneontology.org/amigo/term/GO:0051341	90	6	1.41529	4.23943	0.0029598	0.0809394	348;857;6697;7014;23564;23576	geneontology_Biological_Process	APOE;DDAH2;CAV1;DDAH1;SPR;TERF2
GO:0032870	cellular response to hormone stimulus	http://amigo.geneontology.org/amigo/term/GO:0032870	689	21	10.8348	1.9382	0.00302781	0.0825992	197;301;523;857;988;1508;2729;2730;5315;5469;5576;5591;5905;6294;6774;8886;9131;9296;9667;23636;51606	geneontology_Biological_Process	PKM;ANXA1;STAT3;CAV1;GCLC;GCLM;NUP62;PRKAR2A;RANGAP1;AHSG;AIFM1;SAFB2;SAFB;CDC5L;PRKDC;ATP6V1A;ATP6V1F;MED1;ATP6V1H;CTSB;DDX18
GO:1900180	regulation of protein localization to nucleus	http://amigo.geneontology.org/amigo/term/GO:1900180	121	7	1.90277	3.67884	0.00303628	0.0826308	999;2147;3843;5469;23636;83666;151636	geneontology_Biological_Process	CDH1;DTX3L;NUP62;PARP9;IPO5;MED1;F2
GO:0036010	protein localization to endosome	http://amigo.geneontology.org/amigo/term/GO:0036010	19	3	0.298783	10.0407	0.00309328	0.0837781	382;7430;151636	geneontology_Biological_Process	ARF6;DTX3L;EZR
GO:0061081	positive regulation of myeloid leukocyte cytokine production involved in immune response	http://amigo.geneontology.org/amigo/term/GO:0061081	19	3	0.298783	10.0407	0.00309328	0.0837781	1653;9188;23586	geneontology_Biological_Process	DDX1;DDX58;DDX21
GO:0000278	mitotic cell cycle	http://amigo.geneontology.org/amigo/term/GO:0000278	927	26	14.5774	1.78358	0.00315385	0.0851596	301;988;2010;2273;2956;3832;3833;4678;4735;5591;5721;7153;7155;8243;8697;9555;10592;10617;10735;22974;23047;23176;23636;24137;29766;55571	geneontology_Biological_Process	ANXA1;CNOT11;FHL1;NUP62;PSME2;STAMBP;TMOD3;NASP;MSH6;STAG2;TOP2A;CDC5L;PRKDC;SMC1A;TOP2B;TPX2;H2AFY;KIF11;KIF4A;KIFC1;PDS5B;SEPT2;SEPT8;SMC2;CDC23;EMD
GO:0003018	vascular process in circulatory system	http://amigo.geneontology.org/amigo/term/GO:0003018	155	8	2.43744	3.28214	0.0031842	0.0851596	348;857;2243;2729;2730;3827;5345;23576	geneontology_Biological_Process	APOE;CAV1;DDAH1;FGA;GCLC;GCLM;KNG1;SERPINF2
GO:0016052	carbohydrate catabolic process	http://amigo.geneontology.org/amigo/term/GO:0016052	155	8	2.43744	3.28214	0.0031842	0.0851596	178;226;2584;3098;3939;5315;6774;51084	geneontology_Biological_Process	PKM;LDHA;STAT3;ALDOA;GALK1;HK1;AGL;CRYL1
GO:0035821	modification of morphology or physiology of other organism	http://amigo.geneontology.org/amigo/term/GO:0035821	155	8	2.43744	3.28214	0.0031842	0.0851596	213;293;348;735;2147;5340;8542;10318	geneontology_Biological_Process	APOE;SLC25A6;TNIP1;PLG;APOL1;C9;ALB;F2
GO:0000070	mitotic sister chromatid segregation	http://amigo.geneontology.org/amigo/term/GO:0000070	155	8	2.43744	3.28214	0.0031842	0.0851596	3833;8243;8697;9555;10592;23047;23636;24137	geneontology_Biological_Process	NUP62;SMC1A;H2AFY;KIF4A;KIFC1;PDS5B;SMC2;CDC23
hsa00620	Pyruvate metabolism	http://www.kegg.jp/kegg-bin/show_pathway?hsa00620+219+3939+5315+55902	39	4	0.61329	6.52219	0.0031931	0.0851596	219;3939;5315;55902	pathway_KEGG	PKM;LDHA;ACSS2;ALDH1B1
GO:1901701	cellular response to oxygen-containing compound	http://amigo.geneontology.org/amigo/term/GO:1901701	1074	29	16.8891	1.71709	0.00319707	0.0851596	197;301;523;857;988;999;1786;2729;2730;3843;4035;5315;5469;5576;5591;5905;6416;6774;6778;7430;8854;8886;9131;9296;25824;51606;54464;55004;91942	geneontology_Biological_Process	PKM;ANXA1;PRDX5;STAT3;CAV1;CDH1;GCLC;GCLM;LAMTOR1;LRP1;MAP2K4;PRKAR2A;RANGAP1;AHSG;AIFM1;ALDH1A2;CDC5L;PRKDC;ATP6V1A;ATP6V1F;IPO5;MED1;NDUFAF2;STAT6;XRN1;ATP6V1H;DDX18;DNMT1;EZR
GO:0051651	maintenance of location in cell	http://amigo.geneontology.org/amigo/term/GO:0051651	92	6	1.44674	4.14727	0.00330291	0.0877719	213;348;857;3098;5905;7430	geneontology_Biological_Process	APOE;CAV1;HK1;RANGAP1;ALB;EZR
GO:0046365	monosaccharide catabolic process	http://amigo.geneontology.org/amigo/term/GO:0046365	64	5	1.00643	4.96808	0.00332018	0.0880236	226;2584;3098;5315;51084	geneontology_Biological_Process	PKM;ALDOA;GALK1;HK1;CRYL1
GO:0009206	purine ribonucleoside triphosphate biosynthetic process	http://amigo.geneontology.org/amigo/term/GO:0009206	124	7	1.94995	3.58984	0.00347932	0.0909545	226;2584;3098;3939;5315;6774;10165	geneontology_Biological_Process	PKM;LDHA;STAT3;ALDOA;GALK1;HK1;SLC25A13
GO:0016877	ligase activity, forming carbon-sulfur bonds	http://amigo.geneontology.org/amigo/term/GO:0016877	40	4	0.629016	6.35914	0.00350466	0.0909545	51703;55902;79611;197322	geneontology_Molecular_Function	ACSL5;ACSS2;ACSF3;ACSS3
GO:0071375	cellular response to peptide hormone stimulus	http://amigo.geneontology.org/amigo/term/GO:0071375	307	12	4.8277	2.48566	0.00352784	0.0909545	197;523;857;988;2729;5315;5576;5591;5905;6774;9296;51606	geneontology_Biological_Process	PKM;STAT3;CAV1;GCLC;PRKAR2A;RANGAP1;AHSG;CDC5L;PRKDC;ATP6V1A;ATP6V1F;ATP6V1H
GO:0001907	killing by symbiont of host cells	http://amigo.geneontology.org/amigo/term/GO:0001907	6	2	0.0943524	21.1971	0.003545	0.0909545	213;735	geneontology_Biological_Process	C9;ALB
GO:0044004	disruption by symbiont of host cell	http://amigo.geneontology.org/amigo/term/GO:0044004	6	2	0.0943524	21.1971	0.003545	0.0909545	213;735	geneontology_Biological_Process	C9;ALB
GO:0015866	ADP transport	http://amigo.geneontology.org/amigo/term/GO:0015866	6	2	0.0943524	21.1971	0.003545	0.0909545	292;293	geneontology_Biological_Process	SLC25A5;SLC25A6
GO:0010757	negative regulation of plasminogen activation	http://amigo.geneontology.org/amigo/term/GO:0010757	6	2	0.0943524	21.1971	0.003545	0.0909545	5345;7057	geneontology_Biological_Process	THBS1;SERPINF2
GO:0010216	maintenance of DNA methylation	http://amigo.geneontology.org/amigo/term/GO:0010216	6	2	0.0943524	21.1971	0.003545	0.0909545	1786;7874	geneontology_Biological_Process	USP7;DNMT1
GO:0040016	embryonic cleavage	http://amigo.geneontology.org/amigo/term/GO:0040016	6	2	0.0943524	21.1971	0.003545	0.0909545	7150;7153	geneontology_Biological_Process	TOP1;TOP2A
GO:0060332	positive regulation of response to interferon-gamma	http://amigo.geneontology.org/amigo/term/GO:0060332	6	2	0.0943524	21.1971	0.003545	0.0909545	5469;83666	geneontology_Biological_Process	PARP9;MED1
GO:0060335	positive regulation of interferon-gamma-mediated signaling pathway	http://amigo.geneontology.org/amigo/term/GO:0060335	6	2	0.0943524	21.1971	0.003545	0.0909545	5469;83666	geneontology_Biological_Process	PARP9;MED1
GO:0015217	ADP transmembrane transporter activity	http://amigo.geneontology.org/amigo/term/GO:0015217	6	2	0.0943524	21.1971	0.003545	0.0909545	292;293	geneontology_Molecular_Function	SLC25A5;SLC25A6
GO:0005345	purine nucleobase transmembrane transporter activity	http://amigo.geneontology.org/amigo/term/GO:0005345	6	2	0.0943524	21.1971	0.003545	0.0909545	292;293	geneontology_Molecular_Function	SLC25A5;SLC25A6
GO:0019103	pyrimidine nucleotide binding	http://amigo.geneontology.org/amigo/term/GO:0019103	6	2	0.0943524	21.1971	0.003545	0.0909545	1854;30833	geneontology_Molecular_Function	NT5C;DUT
GO:0032481	positive regulation of type I interferon production	http://amigo.geneontology.org/amigo/term/GO:0032481	65	5	1.02215	4.89165	0.00355153	0.0909545	3428;4791;5591;6778;23586	geneontology_Biological_Process	NFKB2;IFI16;DDX58;PRKDC;STAT6
GO:0009145	purine nucleoside triphosphate biosynthetic process	http://amigo.geneontology.org/amigo/term/GO:0009145	125	7	1.96567	3.56112	0.00363742	0.0929436	226;2584;3098;3939;5315;6774;10165	geneontology_Biological_Process	PKM;LDHA;STAT3;ALDOA;GALK1;HK1;SLC25A13
GO:0002702	positive regulation of production of molecular mediator of immune response	http://amigo.geneontology.org/amigo/term/GO:0002702	94	6	1.47819	4.05903	0.00367481	0.0936869	1653;2956;3098;6778;9188;23586	geneontology_Biological_Process	DDX1;DDX58;HK1;MSH6;DDX21;STAT6
GO:0033344	cholesterol efflux	http://amigo.geneontology.org/amigo/term/GO:0033344	41	4	0.644741	6.20404	0.00383625	0.096908	335;348;4035;55004	geneontology_Biological_Process	APOE;LAMTOR1;LRP1;APOA1
GO:0090224	regulation of spindle organization	http://amigo.geneontology.org/amigo/term/GO:0090224	41	4	0.644741	6.20404	0.00383625	0.096908	8243;10735;22974;23636	geneontology_Biological_Process	NUP62;STAG2;SMC1A;TPX2
GO:0000959	mitochondrial RNA metabolic process	http://amigo.geneontology.org/amigo/term/GO:0000959	41	4	0.644741	6.20404	0.00383625	0.096908	3028;9238;10128;51095	geneontology_Biological_Process	HSD17B10;TBRG4;TRNT1;LRPPRC
hsa05332	Graft-versus-host disease	http://www.kegg.jp/kegg-bin/show_pathway?hsa05332+3105+3106+3107+3122	41	4	0.644741	6.20404	0.00383625	0.096908	3105;3106;3107;3122	pathway_KEGG	HLA-A;HLA-B;HLA-C;HLA-DRA
GO:0048585	negative regulation of response to stimulus	http://amigo.geneontology.org/amigo/term/GO:0048585	1545	38	24.2957	1.56406	0.00384406	0.096908	18;197;259;292;301;335;348;710;722;727;857;1500;2010;2147;2243;2729;2730;3428;3827;4035;4925;5340;5345;5591;6778;7014;7057;7430;7448;8027;9097;10318;10449;10617;23576;23636;55003;91942	geneontology_Biological_Process	ANXA1;APOE;CTNND1;IFI16;SLC25A5;TNIP1;ACAA2;C5;CAV1;DDAH1;FGA;GCLC;GCLM;LRP1;NUCB2;NUP62;PLG;SERPING1;STAMBP;THBS1;USP14;VTN;AHSG;AMBP;APOA1;C4BPA;PRKDC;ABAT;KNG1;NDUFAF2;PAK1IP1;SERPINF2;STAM;STAT6;TERF2;EMD;EZR;F2
GO:0045766	positive regulation of angiogenesis	http://amigo.geneontology.org/amigo/term/GO:0045766	160	8	2.51606	3.17957	0.00386224	0.0969337	301;306;727;729;5315;6774;7057;23576	geneontology_Biological_Process	PKM;ANXA1;STAT3;C5;C6;DDAH1;THBS1;ANXA3
GO:0008201	heparin binding	http://amigo.geneontology.org/amigo/term/GO:0008201	160	8	2.51606	3.17957	0.00386224	0.0969337	307;348;2147;3075;3827;7057;7123;7448	geneontology_Molecular_Function	APOE;ANXA4;THBS1;VTN;CLEC3B;KNG1;CFH;F2
GO:0015931	nucleobase-containing compound transport	http://amigo.geneontology.org/amigo/term/GO:0015931	233	10	3.66402	2.72924	0.00391817	0.0981194	292;293;4600;5813;6059;7014;9961;10128;22916;23636	geneontology_Biological_Process	SLC25A5;SLC25A6;ABCE1;MX2;NUP62;MVP;LRPPRC;NCBP2;PURA;TERF2
GO:0071230	cellular response to amino acid stimulus	http://amigo.geneontology.org/amigo/term/GO:0071230	67	5	1.0536	4.74563	0.00404858	0.101161	1786;2729;2730;3843;55004	geneontology_Biological_Process	GCLC;GCLM;LAMTOR1;IPO5;DNMT1
GO:0006790	sulfur compound metabolic process	http://amigo.geneontology.org/amigo/term/GO:0006790	354	13	5.56679	2.33528	0.0041339	0.102521	191;2639;2729;2730;2938;8942;10005;26027;51703;55902;79017;84245;197322	geneontology_Biological_Process	ACSL5;ACSS2;GCDH;GCLC;GCLM;GSTA1;KYNU;ACOT11;ACSF3;ACOT8;GGCT;MRI1;AHCY
GO:0009219	pyrimidine deoxyribonucleotide metabolic process	http://amigo.geneontology.org/amigo/term/GO:0009219	21	3	0.330233	9.08449	0.00414839	0.102521	1841;1854;30833	geneontology_Biological_Process	NT5C;DUT;DTYMK
GO:0000062	fatty-acyl-CoA binding	http://amigo.geneontology.org/amigo/term/GO:0000062	21	3	0.330233	9.08449	0.00414839	0.102521	2639;26027;28976	geneontology_Molecular_Function	GCDH;ACAD9;ACOT11
GO:0004602	glutathione peroxidase activity	http://amigo.geneontology.org/amigo/term/GO:0004602	21	3	0.330233	9.08449	0.00414839	0.102521	2878;2938;493869	geneontology_Molecular_Function	GPX8;GSTA1;GPX3
GO:0019200	carbohydrate kinase activity	http://amigo.geneontology.org/amigo/term/GO:0019200	21	3	0.330233	9.08449	0.00414839	0.102521	2584;3098;55577	geneontology_Molecular_Function	GALK1;HK1;NAGK
hsa04217	Necroptosis	http://www.kegg.jp/kegg-bin/show_pathway?hsa04217+10379+292+293+6774+6778+823+9131+9555	162	8	2.54751	3.14032	0.00416272	0.102613	10379;292;293;6774;6778;823;9131;9555	pathway_KEGG	IRF9;SLC25A5;SLC25A6;STAT3;AIFM1;CAPN1;H2AFY;STAT6
GO:0033043	regulation of organelle organization	http://amigo.geneontology.org/amigo/term/GO:0033043	1245	32	19.5781	1.63448	0.00418005	0.102613	292;301;335;382;397;822;1786;3832;3980;3998;4035;5345;7014;7153;7430;7874;8027;8243;8697;8726;9555;10096;10449;10565;10735;22974;23176;23636;24139;29766;54464;81876	geneontology_Biological_Process	ANXA1;SLC25A5;ACAA2;ARF6;EML2;LIG3;LMAN1;LRP1;NUP62;RAB1B;TMOD3;USP7;APOA1;ARFGEF1;ARHGDIB;CAPG;STAG2;TOP2A;ACTR3;SMC1A;TPX2;H2AFY;KIF11;SEPT8;SERPINF2;STAM;TERF2;XRN1;CDC23;DNMT1;EED;EZR
GO:0000096	sulfur amino acid metabolic process	http://amigo.geneontology.org/amigo/term/GO:0000096	42	4	0.660467	6.05632	0.00418846	0.102613	191;2729;2730;84245	geneontology_Biological_Process	GCLC;GCLM;MRI1;AHCY
hsa00860	Porphyrin and chlorophyll metabolism	http://www.kegg.jp/kegg-bin/show_pathway?hsa00860+1356+644+645+7389	42	4	0.660467	6.05632	0.00418846	0.102613	1356;644;645;7389	pathway_KEGG	BLVRB;UROD;BLVRA;CP
GO:0050878	regulation of body fluid levels	http://amigo.geneontology.org/amigo/term/GO:0050878	483	16	7.59537	2.10655	0.00424137	0.10346	18;348;710;857;1192;2147;2243;3827;3998;5340;5345;5469;5576;7057;7448;50808	geneontology_Biological_Process	APOE;CAV1;FGA;LMAN1;PLG;PRKAR2A;SERPING1;THBS1;VTN;ABAT;AK3;KNG1;MED1;SERPINF2;CLIC1;F2
GO:0031667	response to nutrient levels	http://amigo.geneontology.org/amigo/term/GO:0031667	483	16	7.59537	2.10655	0.00424137	0.10346	178;191;213;335;348;2729;2730;3428;3939;4925;5315;5469;8854;8942;9131;53615	geneontology_Biological_Process	PKM;APOE;IFI16;LDHA;GCLC;GCLM;KYNU;NUCB2;AGL;AIFM1;ALDH1A2;APOA1;MBD3;MED1;AHCY;ALB
GO:0098869	cellular oxidant detoxification	http://amigo.geneontology.org/amigo/term/GO:0098869	97	6	1.52536	3.93349	0.00428977	0.104415	213;348;2878;2938;25824;493869	geneontology_Biological_Process	APOE;PRDX5;GPX8;GSTA1;GPX3;ALB
GO:0046824	positive regulation of nucleocytoplasmic transport	http://amigo.geneontology.org/amigo/term/GO:0046824	68	5	1.06933	4.67584	0.00431489	0.104801	999;2010;3843;5469;22916	geneontology_Biological_Process	CDH1;NCBP2;IPO5;MED1;EMD
GO:0051223	regulation of protein transport	http://amigo.geneontology.org/amigo/term/GO:0051223	665	20	10.4574	1.91252	0.0043763	0.106064	18;292;293;301;307;335;727;999;2010;2243;3098;3843;3998;4035;5469;5905;7430;23586;23636;91942	geneontology_Biological_Process	ANXA1;SLC25A5;SLC25A6;ANXA4;C5;CDH1;DDX58;FGA;HK1;LMAN1;LRP1;NUP62;RANGAP1;APOA1;ABAT;IPO5;MED1;NDUFAF2;EMD;EZR
GO:0043066	negative regulation of apoptotic process	http://amigo.geneontology.org/amigo/term/GO:0043066	902	25	14.1843	1.76251	0.00438606	0.106073	16;213;292;301;307;348;857;1786;2243;2729;2730;3190;4035;5469;5591;6416;6774;7057;10449;10617;23564;23636;25824;65264;192670	geneontology_Biological_Process	ANXA1;APOE;DDAH2;PRDX5;SLC25A5;STAT3;ACAA2;ANXA4;CAV1;FGA;GCLC;GCLM;HNRNPK;LRP1;MAP2K4;NUP62;STAMBP;THBS1;AGO4;PRKDC;MED1;UBE2Z;AARS;ALB;DNMT1
GO:0034097	response to cytokine	http://amigo.geneontology.org/amigo/term/GO:0034097	1100	29	17.2979	1.6765	0.00447365	0.10796	292;301;335;471;857;988;1974;2729;2730;2923;3122;3428;4312;4600;4791;5469;5721;6059;6774;6778;7057;8726;8854;8942;10096;10379;23586;83666;115361	geneontology_Biological_Process	NFKB2;MMP1;ANXA1;EIF4A2;IFI16;IRF9;SLC25A5;STAT3;ABCE1;ATIC;CAV1;DDX58;GBP4;GCLC;GCLM;KYNU;MX2;PARP9;PDIA3;PSME2;THBS1;ALDH1A2;APOA1;ACTR3;CDC5L;HLA-DRA;MED1;STAT6;EED
GO:0019395	fatty acid oxidation	http://amigo.geneontology.org/amigo/term/GO:0019395	98	6	1.54109	3.89335	0.00451071	0.108178	2110;2639;10005;10449;26063;56898	geneontology_Biological_Process	ACAA2;ETFDH;GCDH;BDH2;ACOT8;DECR2
GO:0061640	cytoskeleton-dependent cytokinesis	http://amigo.geneontology.org/amigo/term/GO:0061640	98	6	1.54109	3.89335	0.00451071	0.108178	4735;10096;10617;23176;23636;24137	geneontology_Biological_Process	NUP62;STAMBP;ACTR3;KIF4A;SEPT2;SEPT8
GO:0050880	regulation of blood vessel size	http://amigo.geneontology.org/amigo/term/GO:0050880	130	7	2.0443	3.42415	0.00451141	0.108178	348;857;2243;2729;2730;3827;5345	geneontology_Biological_Process	APOE;CAV1;FGA;GCLC;GCLM;KNG1;SERPINF2
GO:1901653	cellular response to peptide	http://amigo.geneontology.org/amigo/term/GO:1901653	358	13	5.62969	2.30918	0.00453882	0.108467	197;523;857;988;2729;4035;5315;5576;5591;5905;6774;9296;51606	geneontology_Biological_Process	PKM;STAT3;CAV1;GCLC;LRP1;PRKAR2A;RANGAP1;AHSG;CDC5L;PRKDC;ATP6V1A;ATP6V1F;ATP6V1H
GO:0009205	purine ribonucleoside triphosphate metabolic process	http://amigo.geneontology.org/amigo/term/GO:0009205	277	11	4.35594	2.52529	0.00455777	0.108467	226;523;2584;3098;3939;4705;5315;6774;10165;50808;55967	geneontology_Biological_Process	PKM;LDHA;STAT3;ALDOA;GALK1;HK1;NDUFA10;AK3;ATP6V1A;NDUFA12;SLC25A13
GO:0009069	serine family amino acid metabolic process	http://amigo.geneontology.org/amigo/term/GO:0009069	43	4	0.676192	5.91548	0.00456186	0.108467	2729;2730;29968;84245	geneontology_Biological_Process	GCLC;GCLM;MRI1;PSAT1
hsa04940	Type I diabetes mellitus	http://www.kegg.jp/kegg-bin/show_pathway?hsa04940+3105+3106+3107+3122	43	4	0.676192	5.91548	0.00456186	0.108467	3105;3106;3107;3122	pathway_KEGG	HLA-A;HLA-B;HLA-C;HLA-DRA
GO:0030219	megakaryocyte differentiation	http://amigo.geneontology.org/amigo/term/GO:0030219	69	5	1.08505	4.60807	0.00459346	0.108989	5469;7057;26523;192669;192670	geneontology_Biological_Process	AGO3;AGO1;THBS1;AGO4;MED1
hsa05203	Viral carcinogenesis	http://www.kegg.jp/kegg-bin/show_pathway?hsa05203+10379+3105+3106+3107+3190+4791+5315+6774+7874	201	9	3.1608	2.84738	0.00463093	0.109647	10379;3105;3106;3107;3190;4791;5315;6774;7874	pathway_KEGG	NFKB2;PKM;IRF9;STAT3;HLA-A;HLA-B;HLA-C;HNRNPK;USP7
GO:0035150	regulation of tube size	http://amigo.geneontology.org/amigo/term/GO:0035150	131	7	2.06003	3.39801	0.00470373	0.111138	348;857;2243;2729;2730;3827;5345	geneontology_Biological_Process	APOE;CAV1;FGA;GCLC;GCLM;KNG1;SERPINF2
GO:0072527	pyrimidine-containing compound metabolic process	http://amigo.geneontology.org/amigo/term/GO:0072527	99	6	1.55681	3.85402	0.00473993	0.111487	1503;1841;1854;8760;30833;50808	geneontology_Biological_Process	NT5C;DUT;CTPS1;AK3;CDS2;DTYMK
GO:0010874	regulation of cholesterol efflux	http://amigo.geneontology.org/amigo/term/GO:0010874	22	3	0.345959	8.67155	0.00474812	0.111487	348;4035;55004	geneontology_Biological_Process	APOE;LAMTOR1;LRP1
GO:2001032	regulation of double-strand break repair via nonhomologous end joining	http://amigo.geneontology.org/amigo/term/GO:2001032	22	3	0.345959	8.67155	0.00474812	0.111487	7913;83666;151636	geneontology_Biological_Process	DTX3L;PARP9;DEK
GO:0051726	regulation of cell cycle	http://amigo.geneontology.org/amigo/term/GO:0051726	1106	29	17.3923	1.66741	0.00482277	0.111613	301;988;1192;2273;2956;3832;3843;4600;5469;5591;5721;6009;6774;7014;7057;7153;7155;8243;8697;8726;9238;9555;10735;22974;23636;29766;55004;55571;58490	geneontology_Biological_Process	ANXA1;STAT3;CNOT11;FHL1;LAMTOR1;MX2;NUP62;PSME2;TBRG4;THBS1;TMOD3;RHEB;MSH6;STAG2;TOP2A;CDC5L;PRKDC;SMC1A;TOP2B;TPX2;H2AFY;IPO5;KIF11;MED1;RPRD1B;TERF2;CDC23;CLIC1;EED
GO:0006886	intracellular protein transport	http://amigo.geneontology.org/amigo/term/GO:0006886	1107	29	17.408	1.6659	0.00488313	0.111613	162;293;372;382;999;1434;2010;3843;3998;5469;5813;5905;6059;6774;7014;8027;8775;8907;10005;10953;22818;22820;22916;23636;26063;26958;55750;81876;131118	geneontology_Biological_Process	COPG1;SLC25A6;STAT3;ABCE1;ARF6;CDH1;COPZ1;LMAN1;NAPA;NUP62;RAB1B;RANGAP1;AGK;AP1B1;ARCN1;CSE1L;ACOT8;DECR2;DNAJC19;NCBP2;PURA;IPO5;MED1;STAM;TERF2;TOMM34;AP1M1;COPG2;EMD
GO:0042440	pigment metabolic process	http://amigo.geneontology.org/amigo/term/GO:0042440	70	5	1.10078	4.54224	0.00488459	0.111613	259;644;645;7389;56898	geneontology_Biological_Process	BLVRB;AMBP;BDH2;UROD;BLVRA
GO:1902850	microtubule cytoskeleton organization involved in mitosis	http://amigo.geneontology.org/amigo/term/GO:1902850	132	7	2.07575	3.37227	0.00490217	0.111613	3832;3833;8243;10735;22974;23636;24137	geneontology_Biological_Process	NUP62;STAG2;SMC1A;TPX2;KIF11;KIF4A;KIFC1
GO:0045916	negative regulation of complement activation	http://amigo.geneontology.org/amigo/term/GO:0045916	7	2	0.110078	18.169	0.0049116	0.111613	710;722	geneontology_Biological_Process	SERPING1;C4BPA
GO:2000258	negative regulation of protein activation cascade	http://amigo.geneontology.org/amigo/term/GO:2000258	7	2	0.110078	18.169	0.0049116	0.111613	710;722	geneontology_Biological_Process	SERPING1;C4BPA
GO:0032489	regulation of Cdc42 protein signal transduction	http://amigo.geneontology.org/amigo/term/GO:0032489	7	2	0.110078	18.169	0.0049116	0.111613	335;348	geneontology_Biological_Process	APOE;APOA1
GO:2000483	negative regulation of interleukin-8 secretion	http://amigo.geneontology.org/amigo/term/GO:2000483	7	2	0.110078	18.169	0.0049116	0.111613	301;307	geneontology_Biological_Process	ANXA1;ANXA4
GO:0034371	chylomicron remodeling	http://amigo.geneontology.org/amigo/term/GO:0034371	7	2	0.110078	18.169	0.0049116	0.111613	335;348	geneontology_Biological_Process	APOE;APOA1
GO:0060352	cell adhesion molecule production	http://amigo.geneontology.org/amigo/term/GO:0060352	7	2	0.110078	18.169	0.0049116	0.111613	335;857	geneontology_Biological_Process	CAV1;APOA1
GO:0032074	negative regulation of nuclease activity	http://amigo.geneontology.org/amigo/term/GO:0032074	7	2	0.110078	18.169	0.0049116	0.111613	6059;7014	geneontology_Biological_Process	ABCE1;TERF2
GO:0009211	pyrimidine deoxyribonucleoside triphosphate metabolic process	http://amigo.geneontology.org/amigo/term/GO:0009211	7	2	0.110078	18.169	0.0049116	0.111613	1841;1854	geneontology_Biological_Process	DUT;DTYMK
GO:0035733	hepatic stellate cell activation	http://amigo.geneontology.org/amigo/term/GO:0035733	7	2	0.110078	18.169	0.0049116	0.111613	2729;2730	geneontology_Biological_Process	GCLC;GCLM
GO:1902965	regulation of protein localization to early endosome	http://amigo.geneontology.org/amigo/term/GO:1902965	7	2	0.110078	18.169	0.0049116	0.111613	7430;151636	geneontology_Biological_Process	DTX3L;EZR
GO:1902966	positive regulation of protein localization to early endosome	http://amigo.geneontology.org/amigo/term/GO:1902966	7	2	0.110078	18.169	0.0049116	0.111613	7430;151636	geneontology_Biological_Process	DTX3L;EZR
GO:0097677	STAT family protein binding	http://amigo.geneontology.org/amigo/term/GO:0097677	7	2	0.110078	18.169	0.0049116	0.111613	83666;151636	geneontology_Molecular_Function	DTX3L;PARP9
GO:0032371	regulation of sterol transport	http://amigo.geneontology.org/amigo/term/GO:0032371	44	4	0.691917	5.78104	0.00495704	0.111746	335;348;4035;55004	geneontology_Biological_Process	APOE;LAMTOR1;LRP1;APOA1
GO:0032374	regulation of cholesterol transport	http://amigo.geneontology.org/amigo/term/GO:0032374	44	4	0.691917	5.78104	0.00495704	0.111746	335;348;4035;55004	geneontology_Biological_Process	APOE;LAMTOR1;LRP1;APOA1
GO:0044003	modification by symbiont of host morphology or physiology	http://amigo.geneontology.org/amigo/term/GO:0044003	44	4	0.691917	5.78104	0.00495704	0.111746	213;293;735;10318	geneontology_Biological_Process	SLC25A6;TNIP1;C9;ALB
hsa00071	Fatty acid degradation	http://www.kegg.jp/kegg-bin/show_pathway?hsa00071+10449+219+2639+51703	44	4	0.691917	5.78104	0.00495704	0.111746	10449;219;2639;51703	pathway_KEGG	ACSL5;ACAA2;GCDH;ALDH1B1
GO:0034440	lipid oxidation	http://amigo.geneontology.org/amigo/term/GO:0034440	100	6	1.57254	3.81548	0.0049776	0.111986	2110;2639;10005;10449;26063;56898	geneontology_Biological_Process	ACAA2;ETFDH;GCDH;BDH2;ACOT8;DECR2
GO:0065003	protein-containing complex assembly	http://amigo.geneontology.org/amigo/term/GO:0065003	1835	43	28.8561	1.49015	0.00505611	0.113526	226;335;348;382;735;822;857;1653;1854;2243;2878;3028;3122;3998;4312;4600;4678;4705;4735;5315;7448;7458;8295;8775;9555;10056;10096;10565;23176;23475;23636;24139;24148;26523;28976;29766;55967;64425;64756;81876;91942;192669;192670	geneontology_Biological_Process	MMP1;PKM;AGO3;APOE;AGO1;ALDOA;ARF6;CAV1;DDX1;DUT;EML2;FGA;HSD17B10;LMAN1;MX2;NAPA;NUP62;POLR1E;QPRT;RAB1B;TMOD3;VTN;ACAD9;AGO4;APOA1;ARFGEF1;ATPAF1;C9;CAPG;NASP;ACTR3;NDUFA10;PRPF6;EIF4H;FARSB;GPX3;H2AFY;HLA-DRA;NDUFA12;NDUFAF2;SEPT2;SEPT8;TRRAP
GO:0050777	negative regulation of immune response	http://amigo.geneontology.org/amigo/term/GO:0050777	133	7	2.09148	3.34692	0.00510685	0.114438	259;301;335;710;722;3428;6778	geneontology_Biological_Process	ANXA1;IFI16;SERPING1;AMBP;APOA1;C4BPA;STAT6
GO:0140014	mitotic nuclear division	http://amigo.geneontology.org/amigo/term/GO:0140014	282	11	4.43456	2.48052	0.00520168	0.116332	3832;3833;8243;8697;9555;10592;10735;22974;23047;23636;24137	geneontology_Biological_Process	NUP62;STAG2;SMC1A;TPX2;H2AFY;KIF11;KIF4A;KIFC1;PDS5B;SMC2;CDC23
GO:1990748	cellular detoxification	http://amigo.geneontology.org/amigo/term/GO:1990748	101	6	1.58827	3.77771	0.00522391	0.116369	213;348;2878;2938;25824;493869	geneontology_Biological_Process	APOE;PRDX5;GPX8;GSTA1;GPX3;ALB
GO:0002504	antigen processing and presentation of peptide or polysaccharide antigen via MHC class II	http://amigo.geneontology.org/amigo/term/GO:0002504	101	6	1.58827	3.77771	0.00522391	0.116369	162;3122;3832;7057;8907;24137	geneontology_Biological_Process	THBS1;AP1B1;HLA-DRA;KIF11;KIF4A;AP1M1
GO:0032543	mitochondrial translation	http://amigo.geneontology.org/amigo/term/GO:0032543	134	7	2.1072	3.32194	0.00531788	0.118049	6150;7818;10128;23395;51069;55037;57038	geneontology_Biological_Process	PTCD3;MRPL2;RARS2;LRPPRC;DAP3;LARS2;MRPL23
GO:0043069	negative regulation of programmed cell death	http://amigo.geneontology.org/amigo/term/GO:0043069	916	25	14.4045	1.73557	0.00532026	0.118049	16;213;292;301;307;348;857;1786;2243;2729;2730;3190;4035;5469;5591;6416;6774;7057;10449;10617;23564;23636;25824;65264;192670	geneontology_Biological_Process	ANXA1;APOE;DDAH2;PRDX5;SLC25A5;STAT3;ACAA2;ANXA4;CAV1;FGA;GCLC;GCLM;HNRNPK;LRP1;MAP2K4;NUP62;STAMBP;THBS1;AGO4;PRKDC;MED1;UBE2Z;AARS;ALB;DNMT1
GO:0043330	response to exogenous dsRNA	http://amigo.geneontology.org/amigo/term/GO:0043330	45	4	0.707643	5.65257	0.00537454	0.11883	857;1653;9188;23586	geneontology_Biological_Process	CAV1;DDX1;DDX58;DDX21
GO:0007064	mitotic sister chromatid cohesion	http://amigo.geneontology.org/amigo/term/GO:0007064	23	3	0.361684	8.29453	0.00539754	0.11883	8243;9555;23047	geneontology_Biological_Process	SMC1A;H2AFY;PDS5B
GO:0009226	nucleotide-sugar biosynthetic process	http://amigo.geneontology.org/amigo/term/GO:0009226	23	3	0.361684	8.29453	0.00539754	0.11883	5238;7358;55577	geneontology_Biological_Process	NAGK;PGM3;UGDH
GO:0046961	proton-transporting ATPase activity, rotational mechanism	http://amigo.geneontology.org/amigo/term/GO:0046961	23	3	0.361684	8.29453	0.00539754	0.11883	523;9296;51606	geneontology_Molecular_Function	ATP6V1A;ATP6V1F;ATP6V1H
GO:0009144	purine nucleoside triphosphate metabolic process	http://amigo.geneontology.org/amigo/term/GO:0009144	284	11	4.46601	2.46305	0.00547856	0.120156	226;523;2584;3098;3939;4705;5315;6774;10165;50808;55967	geneontology_Biological_Process	PKM;LDHA;STAT3;ALDOA;GALK1;HK1;NDUFA10;AK3;ATP6V1A;NDUFA12;SLC25A13
GO:0032368	regulation of lipid transport	http://amigo.geneontology.org/amigo/term/GO:0032368	102	6	1.60399	3.74067	0.00547904	0.120156	335;348;3190;4035;7057;55004	geneontology_Biological_Process	APOE;HNRNPK;LAMTOR1;LRP1;THBS1;APOA1
GO:0003774	motor activity	http://amigo.geneontology.org/amigo/term/GO:0003774	135	7	2.12293	3.29733	0.0055354	0.121157	3832;3833;24137;57530;64005;79784;89953	geneontology_Molecular_Function	CGN;KLC4;MYH14;KIF11;KIF4A;KIFC1;MYO1G
GO:0071103	DNA conformation change	http://amigo.geneontology.org/amigo/term/GO:0071103	245	10	3.85272	2.59557	0.00555521	0.121355	301;1653;4678;5813;7150;7153;7155;9131;9555;10592	geneontology_Biological_Process	ANXA1;DDX1;AIFM1;NASP;TOP1;TOP2A;PURA;TOP2B;H2AFY;SMC2
GO:0051701	interaction with host	http://amigo.geneontology.org/amigo/term/GO:0051701	207	9	3.25516	2.76484	0.00559618	0.122014	213;293;735;857;999;1500;1508;1525;10318	geneontology_Biological_Process	CTNND1;SLC25A6;TNIP1;CAV1;CDH1;C9;ALB;CTSB;CXADR
GO:0019058	viral life cycle	http://amigo.geneontology.org/amigo/term/GO:0019058	285	11	4.48174	2.4544	0.00562129	0.122325	348;857;1508;1525;3428;6780;7153;7155;7913;10318;81876	geneontology_Biological_Process	APOE;IFI16;TNIP1;CAV1;RAB1B;STAU1;TOP2A;DEK;TOP2B;CTSB;CXADR
GO:0033865	nucleoside bisphosphate metabolic process	http://amigo.geneontology.org/amigo/term/GO:0033865	136	7	2.13865	3.27309	0.00575951	0.124375	2639;8942;10005;26027;51703;55902;197322	geneontology_Biological_Process	ACSL5;ACSS2;GCDH;KYNU;ACOT11;ACSF3;ACOT8
GO:0033875	ribonucleoside bisphosphate metabolic process	http://amigo.geneontology.org/amigo/term/GO:0033875	136	7	2.13865	3.27309	0.00575951	0.124375	2639;8942;10005;26027;51703;55902;197322	geneontology_Biological_Process	ACSL5;ACSS2;GCDH;KYNU;ACOT11;ACSF3;ACOT8
GO:0034032	purine nucleoside bisphosphate metabolic process	http://amigo.geneontology.org/amigo/term/GO:0034032	136	7	2.13865	3.27309	0.00575951	0.124375	2639;8942;10005;26027;51703;55902;197322	geneontology_Biological_Process	ACSL5;ACSS2;GCDH;KYNU;ACOT11;ACSF3;ACOT8
GO:0019842	vitamin binding	http://amigo.geneontology.org/amigo/term/GO:0019842	136	7	2.13865	3.27309	0.00575951	0.124375	18;213;733;2638;5351;8854;8942	geneontology_Molecular_Function	C8G;PLOD1;GC;KYNU;ALDH1A2;ABAT;ALB
GO:0044764	multi-organism cellular process	http://amigo.geneontology.org/amigo/term/GO:0044764	46	4	0.723368	5.52969	0.00581492	0.125093	213;735;2147;23586	geneontology_Biological_Process	DDX58;C9;ALB;F2
GO:0060443	mammary gland morphogenesis	http://amigo.geneontology.org/amigo/term/GO:0060443	46	4	0.723368	5.52969	0.00581492	0.125093	823;857;5469;6778	geneontology_Biological_Process	CAV1;CAPN1;MED1;STAT6
GO:0051493	regulation of cytoskeleton organization	http://amigo.geneontology.org/amigo/term/GO:0051493	500	16	7.8627	2.03492	0.00587402	0.126124	335;382;397;822;3832;4035;5345;7430;8243;10096;10565;10735;22974;23636;24139;29766	geneontology_Biological_Process	ARF6;EML2;LRP1;NUP62;TMOD3;APOA1;ARFGEF1;ARHGDIB;CAPG;STAG2;ACTR3;SMC1A;TPX2;KIF11;SERPINF2;EZR
GO:0001889	liver development	http://amigo.geneontology.org/amigo/term/GO:0001889	137	7	2.15438	3.2492	0.00599035	0.128378	301;382;1854;5315;5469;7448;8854	geneontology_Biological_Process	PKM;ANXA1;ARF6;DUT;VTN;ALDH1A2;MED1
GO:0009062	fatty acid catabolic process	http://amigo.geneontology.org/amigo/term/GO:0009062	104	6	1.63544	3.66873	0.00601647	0.128693	2110;2639;10005;10449;26063;56898	geneontology_Biological_Process	ACAA2;ETFDH;GCDH;BDH2;ACOT8;DECR2
GO:0046034	ATP metabolic process	http://amigo.geneontology.org/amigo/term/GO:0046034	248	10	3.8999	2.56417	0.00603796	0.128909	226;523;2584;3098;3939;4705;5315;6774;10165;55967	geneontology_Biological_Process	PKM;LDHA;STAT3;ALDOA;GALK1;HK1;NDUFA10;ATP6V1A;NDUFA12;SLC25A13
GO:0010639	negative regulation of organelle organization	http://amigo.geneontology.org/amigo/term/GO:0010639	371	13	5.83412	2.22827	0.00608059	0.129574	292;822;1786;3980;3998;7014;7153;9555;10449;10565;24139;29766;54464	geneontology_Biological_Process	SLC25A5;ACAA2;EML2;LIG3;LMAN1;TMOD3;ARFGEF1;CAPG;TOP2A;H2AFY;TERF2;XRN1;DNMT1
GO:0006221	pyrimidine nucleotide biosynthetic process	http://amigo.geneontology.org/amigo/term/GO:0006221	47	4	0.739094	5.41203	0.00627869	0.133543	1503;1841;1854;8760	geneontology_Biological_Process	DUT;CTPS1;CDS2;DTYMK
GO:0017038	protein import	http://amigo.geneontology.org/amigo/term/GO:0017038	211	9	3.31806	2.71243	0.00632144	0.1342	348;999;1434;3843;5469;6774;23636;55750;131118	geneontology_Biological_Process	APOE;STAT3;CDH1;NUP62;AGK;CSE1L;DNAJC19;IPO5;MED1
GO:0045807	positive regulation of endocytosis	http://amigo.geneontology.org/amigo/term/GO:0045807	139	7	2.18583	3.20244	0.00647267	0.1353	197;348;3190;4035;7018;7448;10960	geneontology_Biological_Process	APOE;LMAN2;HNRNPK;LRP1;VTN;AHSG;TF
GO:0070459	prolactin secretion	http://amigo.geneontology.org/amigo/term/GO:0070459	8	2	0.125803	15.8978	0.00648107	0.1353	18;301	geneontology_Biological_Process	ANXA1;ABAT
GO:0010873	positive regulation of cholesterol esterification	http://amigo.geneontology.org/amigo/term/GO:0010873	8	2	0.125803	15.8978	0.00648107	0.1353	335;348	geneontology_Biological_Process	APOE;APOA1
GO:0046498	S-adenosylhomocysteine metabolic process	http://amigo.geneontology.org/amigo/term/GO:0046498	8	2	0.125803	15.8978	0.00648107	0.1353	191;84245	geneontology_Biological_Process	MRI1;AHCY
GO:0006863	purine nucleobase transport	http://amigo.geneontology.org/amigo/term/GO:0006863	8	2	0.125803	15.8978	0.00648107	0.1353	292;293	geneontology_Biological_Process	SLC25A5;SLC25A6
GO:1901029	negative regulation of mitochondrial outer membrane permeabilization involved in apoptotic signaling pathway	http://amigo.geneontology.org/amigo/term/GO:1901029	8	2	0.125803	15.8978	0.00648107	0.1353	292;10449	geneontology_Biological_Process	SLC25A5;ACAA2
GO:0060056	mammary gland involution	http://amigo.geneontology.org/amigo/term/GO:0060056	8	2	0.125803	15.8978	0.00648107	0.1353	823;857	geneontology_Biological_Process	CAV1;CAPN1
GO:0015205	nucleobase transmembrane transporter activity	http://amigo.geneontology.org/amigo/term/GO:0015205	8	2	0.125803	15.8978	0.00648107	0.1353	292;293	geneontology_Molecular_Function	SLC25A5;SLC25A6
hsa00740	Riboflavin metabolism	http://www.kegg.jp/kegg-bin/show_pathway?hsa00740+53+645	8	2	0.125803	15.8978	0.00648107	0.1353	53;645	pathway_KEGG	BLVRB;ACP2
GO:0042632	cholesterol homeostasis	http://amigo.geneontology.org/amigo/term/GO:0042632	75	5	1.1794	4.23943	0.00653897	0.135756	335;348;857;22913;55004	geneontology_Biological_Process	APOE;CAV1;LAMTOR1;APOA1;RALY
GO:0006303	double-strand break repair via nonhomologous end joining	http://amigo.geneontology.org/amigo/term/GO:0006303	75	5	1.1794	4.23943	0.00653897	0.135756	3980;5591;7913;83666;151636	geneontology_Biological_Process	DTX3L;LIG3;PARP9;DEK;PRKDC
hsa01230	Biosynthesis of amino acids	http://www.kegg.jp/kegg-bin/show_pathway?hsa01230+226+29968+5315+5832+7086	75	5	1.1794	4.23943	0.00653897	0.135756	226;29968;5315;5832;7086	pathway_KEGG	PKM;ALDOA;ALDH18A1;PSAT1;TKT
GO:0007051	spindle organization	http://amigo.geneontology.org/amigo/term/GO:0007051	175	8	2.75194	2.90704	0.00657782	0.136312	3832;3833;7430;8243;10735;22974;23636;24137	geneontology_Biological_Process	NUP62;STAG2;SMC1A;TPX2;KIF11;KIF4A;KIFC1;EZR
GO:0061008	hepaticobiliary system development	http://amigo.geneontology.org/amigo/term/GO:0061008	140	7	2.20156	3.17957	0.0067244	0.139094	301;382;1854;5315;5469;7448;8854	geneontology_Biological_Process	PKM;ANXA1;ARF6;DUT;VTN;ALDH1A2;MED1
GO:0006735	NADH regeneration	http://amigo.geneontology.org/amigo/term/GO:0006735	25	3	0.393135	7.63097	0.00684968	0.140655	226;3098;5315	geneontology_Biological_Process	PKM;ALDOA;HK1
GO:0061621	canonical glycolysis	http://amigo.geneontology.org/amigo/term/GO:0061621	25	3	0.393135	7.63097	0.00684968	0.140655	226;3098;5315	geneontology_Biological_Process	PKM;ALDOA;HK1
GO:0061718	glucose catabolic process to pyruvate	http://amigo.geneontology.org/amigo/term/GO:0061718	25	3	0.393135	7.63097	0.00684968	0.140655	226;3098;5315	geneontology_Biological_Process	PKM;ALDOA;HK1
GO:0046835	carbohydrate phosphorylation	http://amigo.geneontology.org/amigo/term/GO:0046835	25	3	0.393135	7.63097	0.00684968	0.140655	2584;3098;55577	geneontology_Biological_Process	GALK1;HK1;NAGK
GO:0006275	regulation of DNA replication	http://amigo.geneontology.org/amigo/term/GO:0006275	107	6	1.68262	3.56587	0.00689327	0.141293	2956;3980;6416;7014;8243;10735	geneontology_Biological_Process	LIG3;MAP2K4;MSH6;STAG2;SMC1A;TERF2
GO:0055092	sterol homeostasis	http://amigo.geneontology.org/amigo/term/GO:0055092	76	5	1.19513	4.18364	0.00691165	0.141413	335;348;857;22913;55004	geneontology_Biological_Process	APOE;CAV1;LAMTOR1;APOA1;RALY
GO:0090087	regulation of peptide transport	http://amigo.geneontology.org/amigo/term/GO:0090087	694	20	10.9134	1.83261	0.0069298	0.141528	18;292;293;301;307;335;727;999;2010;2243;3098;3843;3998;4035;5469;5905;7430;23586;23636;91942	geneontology_Biological_Process	ANXA1;SLC25A5;SLC25A6;ANXA4;C5;CDH1;DDX58;FGA;HK1;LMAN1;LRP1;NUP62;RANGAP1;APOA1;ABAT;IPO5;MED1;NDUFAF2;EMD;EZR
GO:0043524	negative regulation of neuron apoptotic process	http://amigo.geneontology.org/amigo/term/GO:0043524	142	7	2.23301	3.13479	0.0072496	0.147764	16;348;2729;2730;4035;6416;10617	geneontology_Biological_Process	APOE;GCLC;GCLM;LRP1;MAP2K4;STAMBP;AARS
GO:1904018	positive regulation of vasculature development	http://amigo.geneontology.org/amigo/term/GO:1904018	178	8	2.79912	2.85804	0.00726127	0.147764	301;306;727;729;5315;6774;7057;23576	geneontology_Biological_Process	PKM;ANXA1;STAT3;C5;C6;DDAH1;THBS1;ANXA3
hsa05166	Human T-cell leukemia virus 1 infection	http://www.kegg.jp/kegg-bin/show_pathway?hsa05166+292+293+3105+3106+3107+3122+4791+6416+8295+8697	255	10	4.00998	2.49378	0.00729168	0.147997	292;293;3105;3106;3107;3122;4791;6416;8295;8697	pathway_KEGG	NFKB2;SLC25A5;SLC25A6;HLA-A;HLA-B;HLA-C;MAP2K4;HLA-DRA;TRRAP;CDC23
GO:0050660	flavin adenine dinucleotide binding	http://amigo.geneontology.org/amigo/term/GO:0050660	77	5	1.21086	4.12931	0.00729892	0.147997	2110;2639;9131;28976;55349	geneontology_Molecular_Function	CHDH;ETFDH;GCDH;ACAD9;AIFM1
GO:1901700	response to oxygen-containing compound	http://amigo.geneontology.org/amigo/term/GO:1901700	1556	37	24.4687	1.51213	0.00740333	0.149844	18;197;301;348;523;857;988;999;1786;2729;2730;2878;3843;3939;4035;4678;4791;5315;5469;5576;5591;5905;6416;6774;6778;7057;7430;8854;8886;9131;9296;25824;51606;53615;54464;55004;91942	geneontology_Biological_Process	NFKB2;PKM;ANXA1;APOE;LDHA;PRDX5;STAT3;CAV1;CDH1;GCLC;GCLM;LAMTOR1;LRP1;MAP2K4;PRKAR2A;RANGAP1;THBS1;AHSG;AIFM1;ALDH1A2;NASP;CDC5L;MBD3;PRKDC;ABAT;ATP6V1A;ATP6V1F;GPX3;IPO5;MED1;NDUFAF2;STAT6;XRN1;ATP6V1H;DDX18;DNMT1;EZR
GO:0072593	reactive oxygen species metabolic process	http://amigo.geneontology.org/amigo/term/GO:0072593	256	10	4.0257	2.48404	0.00748608	0.151125	857;2147;2878;6697;6774;7057;23564;23576;25824;91942	geneontology_Biological_Process	DDAH2;PRDX5;STAT3;CAV1;DDAH1;THBS1;GPX3;NDUFAF2;SPR;F2
GO:0045786	negative regulation of cell cycle	http://amigo.geneontology.org/amigo/term/GO:0045786	559	17	8.7905	1.93391	0.00749334	0.151125	988;2273;2956;3843;5591;6009;7014;7057;7153;7155;8243;8726;9238;9555;10735;55004;55571	geneontology_Biological_Process	CNOT11;FHL1;LAMTOR1;TBRG4;THBS1;RHEB;MSH6;STAG2;TOP2A;CDC5L;PRKDC;SMC1A;TOP2B;H2AFY;IPO5;TERF2;EED
GO:0000041	transition metal ion transport	http://amigo.geneontology.org/amigo/term/GO:0000041	109	6	1.71407	3.50044	0.00752699	0.151533	392;523;1356;7018;9296;51606	geneontology_Biological_Process	ATP6V1A;ATP6V1F;TF;ARHGAP1;ATP6V1H;CP
GO:0015949	nucleobase-containing small molecule interconversion	http://amigo.geneontology.org/amigo/term/GO:0015949	26	3	0.40886	7.33747	0.00765428	0.153004	1503;1841;1854	geneontology_Biological_Process	DUT;CTPS1;DTYMK
GO:0002360	T cell lineage commitment	http://amigo.geneontology.org/amigo/term/GO:0002360	26	3	0.40886	7.33747	0.00765428	0.153004	5591;6774;6778	geneontology_Biological_Process	STAT3;PRKDC;STAT6
GO:0002230	positive regulation of defense response to virus by host	http://amigo.geneontology.org/amigo/term/GO:0002230	26	3	0.40886	7.33747	0.00765428	0.153004	23586;83666;151636	geneontology_Biological_Process	DDX58;DTX3L;PARP9
GO:0070325	lipoprotein particle receptor binding	http://amigo.geneontology.org/amigo/term/GO:0070325	26	3	0.40886	7.33747	0.00765428	0.153004	335;348;4035	geneontology_Molecular_Function	APOE;LRP1;APOA1
GO:0030100	regulation of endocytosis	http://amigo.geneontology.org/amigo/term/GO:0030100	257	10	4.04143	2.47437	0.00768448	0.153337	197;348;382;722;857;3190;4035;7018;7448;10960	geneontology_Biological_Process	APOE;LMAN2;ARF6;CAV1;HNRNPK;LRP1;VTN;AHSG;C4BPA;TF
GO:0009991	response to extracellular stimulus	http://amigo.geneontology.org/amigo/term/GO:0009991	515	16	8.09858	1.97566	0.00770762	0.153527	178;191;213;335;348;2729;2730;3428;3939;4925;5315;5469;8854;8942;9131;53615	geneontology_Biological_Process	PKM;APOE;IFI16;LDHA;GCLC;GCLM;KYNU;NUCB2;AGL;AIFM1;ALDH1A2;APOA1;MBD3;MED1;AHCY;ALB
GO:0034249	negative regulation of cellular amide metabolic process	http://amigo.geneontology.org/amigo/term/GO:0034249	144	7	2.26446	3.09125	0.0078046	0.15513	348;5813;6774;26523;54464;192669;192670	geneontology_Biological_Process	AGO3;APOE;STAT3;AGO1;AGO4;PURA;XRN1
hsa04979	Cholesterol metabolism	http://www.kegg.jp/kegg-bin/show_pathway?hsa04979+335+337+348+4035	50	4	0.78627	5.08731	0.00781556	0.15513	335;337;348;4035	pathway_KEGG	APOE;LRP1;APOA1;APOA4
GO:0005539	glycosaminoglycan binding	http://amigo.geneontology.org/amigo/term/GO:0005539	219	9	3.44386	2.61335	0.00798711	0.158257	307;348;2147;3075;3098;3827;7057;7123;7448	geneontology_Molecular_Function	APOE;ANXA4;HK1;THBS1;VTN;CLEC3B;KNG1;CFH;F2
GO:0009133	nucleoside diphosphate biosynthetic process	http://amigo.geneontology.org/amigo/term/GO:0009133	9	2	0.141529	14.1314	0.00824673	0.159757	1841;50808	geneontology_Biological_Process	AK3;DTYMK
GO:2000644	regulation of receptor catabolic process	http://amigo.geneontology.org/amigo/term/GO:2000644	9	2	0.141529	14.1314	0.00824673	0.159757	348;151636	geneontology_Biological_Process	APOE;DTX3L
GO:0034378	chylomicron assembly	http://amigo.geneontology.org/amigo/term/GO:0034378	9	2	0.141529	14.1314	0.00824673	0.159757	335;348	geneontology_Biological_Process	APOE;APOA1
GO:0035376	sterol import	http://amigo.geneontology.org/amigo/term/GO:0035376	9	2	0.141529	14.1314	0.00824673	0.159757	335;55004	geneontology_Biological_Process	LAMTOR1;APOA1
GO:0070508	cholesterol import	http://amigo.geneontology.org/amigo/term/GO:0070508	9	2	0.141529	14.1314	0.00824673	0.159757	335;55004	geneontology_Biological_Process	LAMTOR1;APOA1
GO:1900221	regulation of amyloid-beta clearance	http://amigo.geneontology.org/amigo/term/GO:1900221	9	2	0.141529	14.1314	0.00824673	0.159757	348;4035	geneontology_Biological_Process	APOE;LRP1
GO:1903069	regulation of ER-associated ubiquitin-dependent protein catabolic process	http://amigo.geneontology.org/amigo/term/GO:1903069	9	2	0.141529	14.1314	0.00824673	0.159757	857;9097	geneontology_Biological_Process	CAV1;USP14
GO:0061085	regulation of histone H3-K27 methylation	http://amigo.geneontology.org/amigo/term/GO:0061085	9	2	0.141529	14.1314	0.00824673	0.159757	8726;9555	geneontology_Biological_Process	H2AFY;EED
GO:0051096	positive regulation of helicase activity	http://amigo.geneontology.org/amigo/term/GO:0051096	9	2	0.141529	14.1314	0.00824673	0.159757	2956;6742	geneontology_Biological_Process	MSH6;SSBP1
GO:0042780	tRNA 3'-end processing	http://amigo.geneontology.org/amigo/term/GO:0042780	9	2	0.141529	14.1314	0.00824673	0.159757	3028;51095	geneontology_Biological_Process	HSD17B10;TRNT1
GO:0008035	high-density lipoprotein particle binding	http://amigo.geneontology.org/amigo/term/GO:0008035	9	2	0.141529	14.1314	0.00824673	0.159757	335;23780	geneontology_Molecular_Function	APOL2;APOA1
GO:0003691	double-stranded telomeric DNA binding	http://amigo.geneontology.org/amigo/term/GO:0003691	9	2	0.141529	14.1314	0.00824673	0.159757	5813;7014	geneontology_Molecular_Function	PURA;TERF2
GO:0003857	3-hydroxyacyl-CoA dehydrogenase activity	http://amigo.geneontology.org/amigo/term/GO:0003857	9	2	0.141529	14.1314	0.00824673	0.159757	3028;51084	geneontology_Molecular_Function	HSD17B10;CRYL1
GO:0035384	thioester biosynthetic process	http://amigo.geneontology.org/amigo/term/GO:0035384	51	4	0.801995	4.98756	0.00837801	0.16092	2639;51703;55902;197322	geneontology_Biological_Process	ACSL5;ACSS2;GCDH;ACSF3
GO:0071616	acyl-CoA biosynthetic process	http://amigo.geneontology.org/amigo/term/GO:0071616	51	4	0.801995	4.98756	0.00837801	0.16092	2639;51703;55902;197322	geneontology_Biological_Process	ACSL5;ACSS2;GCDH;ACSF3
GO:0002720	positive regulation of cytokine production involved in immune response	http://amigo.geneontology.org/amigo/term/GO:0002720	51	4	0.801995	4.98756	0.00837801	0.16092	1653;3098;9188;23586	geneontology_Biological_Process	DDX1;DDX58;HK1;DDX21
GO:0006749	glutathione metabolic process	http://amigo.geneontology.org/amigo/term/GO:0006749	51	4	0.801995	4.98756	0.00837801	0.16092	2729;2730;2938;79017	geneontology_Biological_Process	GCLC;GCLM;GSTA1;GGCT
GO:0004601	peroxidase activity	http://amigo.geneontology.org/amigo/term/GO:0004601	51	4	0.801995	4.98756	0.00837801	0.16092	2878;2938;25824;493869	geneontology_Molecular_Function	PRDX5;GPX8;GSTA1;GPX3
GO:0034368	protein-lipid complex remodeling	http://amigo.geneontology.org/amigo/term/GO:0034368	27	3	0.424586	7.06571	0.00851235	0.162112	213;335;348	geneontology_Biological_Process	APOE;APOA1;ALB
GO:0034369	plasma lipoprotein particle remodeling	http://amigo.geneontology.org/amigo/term/GO:0034369	27	3	0.424586	7.06571	0.00851235	0.162112	213;335;348	geneontology_Biological_Process	APOE;APOA1;ALB
GO:1901567	fatty acid derivative binding	http://amigo.geneontology.org/amigo/term/GO:1901567	27	3	0.424586	7.06571	0.00851235	0.162112	2639;26027;28976	geneontology_Molecular_Function	GCDH;ACAD9;ACOT11
GO:0043112	receptor metabolic process	http://amigo.geneontology.org/amigo/term/GO:0043112	183	8	2.87775	2.77995	0.0085177	0.162112	348;823;857;3190;4035;7430;55004;151636	geneontology_Biological_Process	APOE;CAV1;DTX3L;HNRNPK;LAMTOR1;LRP1;CAPN1;EZR
GO:0070201	regulation of establishment of protein localization	http://amigo.geneontology.org/amigo/term/GO:0070201	708	20	11.1336	1.79637	0.00854061	0.162112	18;292;293;301;307;335;727;999;2010;2243;3098;3843;3998;4035;5469;5905;7430;23586;23636;91942	geneontology_Biological_Process	ANXA1;SLC25A5;SLC25A6;ANXA4;C5;CDH1;DDX58;FGA;HK1;LMAN1;LRP1;NUP62;RANGAP1;APOA1;ABAT;IPO5;MED1;NDUFAF2;EMD;EZR
GO:0006979	response to oxidative stress	http://amigo.geneontology.org/amigo/term/GO:0006979	431	14	6.77765	2.06561	0.00854907	0.162112	301;348;2110;2729;2730;2878;3939;6778;6780;9131;9555;25824;55967;493869	geneontology_Biological_Process	ANXA1;APOE;LDHA;PRDX5;ETFDH;GCLC;GCLM;GPX8;AIFM1;STAU1;GPX3;H2AFY;NDUFA12;STAT6
GO:0002718	regulation of cytokine production involved in immune response	http://amigo.geneontology.org/amigo/term/GO:0002718	80	5	1.25803	3.97446	0.00855117	0.162112	335;1653;3098;9188;23586	geneontology_Biological_Process	DDX1;DDX58;HK1;APOA1;DDX21
GO:0043200	response to amino acid	http://amigo.geneontology.org/amigo/term/GO:0043200	112	6	1.76124	3.40668	0.0085549	0.162112	1786;2729;2730;3843;9131;55004	geneontology_Biological_Process	GCLC;GCLM;LAMTOR1;AIFM1;IPO5;DNMT1
GO:0051053	negative regulation of DNA metabolic process	http://amigo.geneontology.org/amigo/term/GO:0051053	147	7	2.31163	3.02816	0.00869511	0.164493	2956;3980;7014;8243;10735;27000;54464	geneontology_Biological_Process	LIG3;MSH6;STAG2;SMC1A;DNAJC2;TERF2;XRN1
GO:0051225	spindle assembly	http://amigo.geneontology.org/amigo/term/GO:0051225	113	6	1.77697	3.37653	0.00891886	0.168444	3832;3833;8243;10735;22974;24137	geneontology_Biological_Process	STAG2;SMC1A;TPX2;KIF11;KIF4A;KIFC1
GO:0032880	regulation of protein localization	http://amigo.geneontology.org/amigo/term/GO:0032880	956	25	15.0335	1.66295	0.00894436	0.168495	18;292;293;301;307;335;382;727;999;2010;2147;2243;3098;3843;3998;4035;5469;5905;7430;9555;23586;23636;83666;91942;151636	geneontology_Biological_Process	ANXA1;SLC25A5;SLC25A6;ANXA4;ARF6;C5;CDH1;DDX58;DTX3L;FGA;HK1;LMAN1;LRP1;NUP62;PARP9;RANGAP1;APOA1;ABAT;H2AFY;IPO5;MED1;NDUFAF2;EMD;EZR;F2
GO:0010823	negative regulation of mitochondrion organization	http://amigo.geneontology.org/amigo/term/GO:0010823	52	4	0.817721	4.89165	0.00896632	0.168495	292;3980;3998;10449	geneontology_Biological_Process	SLC25A5;ACAA2;LIG3;LMAN1
GO:0043331	response to dsRNA	http://amigo.geneontology.org/amigo/term/GO:0043331	52	4	0.817721	4.89165	0.00896632	0.168495	857;1653;9188;23586	geneontology_Biological_Process	CAV1;DDX1;DDX58;DDX21
GO:0000726	non-recombinational repair	http://amigo.geneontology.org/amigo/term/GO:0000726	81	5	1.27376	3.92539	0.00899965	0.168841	3980;5591;7913;83666;151636	geneontology_Biological_Process	DTX3L;LIG3;PARP9;DEK;PRKDC
GO:0048732	gland development	http://amigo.geneontology.org/amigo/term/GO:0048732	434	14	6.82482	2.05134	0.00905247	0.16955	301;335;382;823;857;999;1854;5315;5469;5591;6778;7430;7448;8854	geneontology_Biological_Process	PKM;ANXA1;ARF6;CAV1;CDH1;DUT;VTN;ALDH1A2;APOA1;CAPN1;PRKDC;MED1;STAT6;EZR
GO:0019079	viral genome replication	http://amigo.geneontology.org/amigo/term/GO:0019079	114	6	1.7927	3.34692	0.00929377	0.173494	3428;6780;7153;7155;7913;10318	geneontology_Biological_Process	IFI16;TNIP1;STAU1;TOP2A;DEK;TOP2B
GO:0031072	heat shock protein binding	http://amigo.geneontology.org/amigo/term/GO:0031072	114	6	1.7927	3.34692	0.00929377	0.173494	335;10953;10960;23636;27000;51182	geneontology_Molecular_Function	LMAN2;NUP62;APOA1;HSPA14;DNAJC2;TOMM34
GO:0046966	thyroid hormone receptor binding	http://amigo.geneontology.org/amigo/term/GO:0046966	28	3	0.440311	6.81336	0.00942464	0.175357	5469;7205;23636	geneontology_Molecular_Function	NUP62;TRIP6;MED1
hsa00650	Butanoate metabolism	http://www.kegg.jp/kegg-bin/show_pathway?hsa00650+18+56898+622	28	3	0.440311	6.81336	0.00942464	0.175357	18;56898;622	pathway_KEGG	BDH1;BDH2;ABAT
GO:0045652	regulation of megakaryocyte differentiation	http://amigo.geneontology.org/amigo/term/GO:0045652	53	4	0.833446	4.79935	0.00958094	0.17768	7057;26523;192669;192670	geneontology_Biological_Process	AGO3;AGO1;THBS1;AGO4
hsa05320	Autoimmune thyroid disease	http://www.kegg.jp/kegg-bin/show_pathway?hsa05320+3105+3106+3107+3122	53	4	0.833446	4.79935	0.00958094	0.17768	3105;3106;3107;3122	pathway_KEGG	HLA-A;HLA-B;HLA-C;HLA-DRA
GO:0051348	negative regulation of transferase activity	http://amigo.geneontology.org/amigo/term/GO:0051348	266	10	4.18296	2.39065	0.00965805	0.178525	197;348;857;1974;3843;5576;9555;9961;23636;151636	geneontology_Biological_Process	APOE;EIF4A2;CAV1;DTX3L;NUP62;PRKAR2A;AHSG;MVP;H2AFY;IPO5
GO:0004386	helicase activity	http://amigo.geneontology.org/amigo/term/GO:0004386	150	7	2.35881	2.9676	0.00965812	0.178525	1653;1974;8886;9188;23586;55661;57062	geneontology_Molecular_Function	EIF4A2;DDX1;DDX24;DDX58;DDX27;DDX21;DDX18
GO:0006090	pyruvate metabolic process	http://amigo.geneontology.org/amigo/term/GO:0006090	115	6	1.80842	3.31781	0.00967981	0.178634	226;2584;3098;3939;5315;6774	geneontology_Biological_Process	PKM;LDHA;STAT3;ALDOA;GALK1;HK1
GO:0034504	protein localization to nucleus	http://amigo.geneontology.org/amigo/term/GO:0034504	267	10	4.19868	2.3817	0.00989921	0.182332	999;1434;2147;3843;5469;5905;6774;23636;83666;151636	geneontology_Biological_Process	STAT3;CDH1;DTX3L;NUP62;PARP9;RANGAP1;CSE1L;IPO5;MED1;F2
GO:0008652	cellular amino acid biosynthetic process	http://amigo.geneontology.org/amigo/term/GO:0008652	83	5	1.30521	3.83081	0.00994479	0.182332	18;5351;5832;29968;84245	geneontology_Biological_Process	PLOD1;MRI1;ABAT;ALDH18A1;PSAT1
GO:0030301	cholesterol transport	http://amigo.geneontology.org/amigo/term/GO:0030301	83	5	1.30521	3.83081	0.00994479	0.182332	335;348;857;4035;55004	geneontology_Biological_Process	APOE;CAV1;LAMTOR1;LRP1;APOA1
GO:0055072	iron ion homeostasis	http://amigo.geneontology.org/amigo/term/GO:0055072	83	5	1.30521	3.83081	0.00994479	0.182332	22;523;1356;7018;56898	geneontology_Biological_Process	ABCB7;BDH2;ATP6V1A;TF;CP
hsa01200	Carbon metabolism	http://www.kegg.jp/kegg-bin/show_pathway?hsa01200+226+29968+3098+5315+55902+7086	116	6	1.82415	3.28921	0.0100771	0.182387	226;29968;3098;5315;55902;7086	pathway_KEGG	PKM;ACSS2;ALDOA;HK1;PSAT1;TKT
GO:0010628	positive regulation of gene expression	http://amigo.geneontology.org/amigo/term/GO:0010628	1911	43	30.0512	1.43089	0.0101003	0.182387	348;729;857;988;999;1786;2962;3182;3190;3428;3608;4791;5345;5469;5591;6294;6774;6778;7014;7057;7123;7153;7430;7913;8854;9031;9188;9555;10096;10318;22916;23586;23636;24148;26523;27000;55127;58490;64425;83666;151636;192669;192670	geneontology_Biological_Process	NFKB2;AGO3;APOE;IFI16;STAT3;TNIP1;AGO1;C6;CAV1;CDH1;DDX58;DTX3L;HNRNPK;NUP62;PARP9;POLR1E;THBS1;AGO4;ALDH1A2;SAFB;TOP2A;ACTR3;CDC5L;DEK;GTF2F1;HNRNPAB;NCBP2;PRKDC;PRPF6;CLEC3B;DDX21;DNAJC2;H2AFY;HEATR1;ILF2;MED1;RPRD1B;SERPINF2;STAT6;TERF2;BAZ1B;DNMT1;EZR
GO:0046907	intracellular transport	http://amigo.geneontology.org/amigo/term/GO:0046907	1803	41	28.3529	1.44606	0.0101325	0.182387	162;293;348;372;382;392;999;1434;2010;2147;3843;3998;4600;5469;5813;5905;6059;6774;7014;7430;8027;8775;8907;10005;10128;10466;10953;10960;22818;22820;22916;23636;24137;26063;26958;55004;55750;81876;84364;131118;151636	geneontology_Biological_Process	COPG1;APOE;LMAN2;SLC25A6;STAT3;ABCE1;ARF6;CDH1;COPZ1;DTX3L;LAMTOR1;LMAN1;MX2;NAPA;NUP62;RAB1B;RANGAP1;AGK;AP1B1;ARCN1;ARFGAP2;CSE1L;ACOT8;DECR2;DNAJC19;LRPPRC;NCBP2;PURA;IPO5;KIF4A;MED1;STAM;TERF2;TOMM34;AP1M1;ARHGAP1;COG5;COPG2;EMD;EZR;F2
GO:0051409	response to nitrosative stress	http://amigo.geneontology.org/amigo/term/GO:0051409	10	2	0.157254	12.7183	0.0102021	0.182387	2729;2730	geneontology_Biological_Process	GCLC;GCLM
GO:0015851	nucleobase transport	http://amigo.geneontology.org/amigo/term/GO:0015851	10	2	0.157254	12.7183	0.0102021	0.182387	292;293	geneontology_Biological_Process	SLC25A5;SLC25A6
GO:0034372	very-low-density lipoprotein particle remodeling	http://amigo.geneontology.org/amigo/term/GO:0034372	10	2	0.157254	12.7183	0.0102021	0.182387	335;348	geneontology_Biological_Process	APOE;APOA1
GO:0009221	pyrimidine deoxyribonucleotide biosynthetic process	http://amigo.geneontology.org/amigo/term/GO:0009221	10	2	0.157254	12.7183	0.0102021	0.182387	1841;1854	geneontology_Biological_Process	DUT;DTYMK
GO:0072537	fibroblast activation	http://amigo.geneontology.org/amigo/term/GO:0072537	10	2	0.157254	12.7183	0.0102021	0.182387	2729;2730	geneontology_Biological_Process	GCLC;GCLM
GO:1902946	protein localization to early endosome	http://amigo.geneontology.org/amigo/term/GO:1902946	10	2	0.157254	12.7183	0.0102021	0.182387	7430;151636	geneontology_Biological_Process	DTX3L;EZR
GO:1905666	regulation of protein localization to endosome	http://amigo.geneontology.org/amigo/term/GO:1905666	10	2	0.157254	12.7183	0.0102021	0.182387	7430;151636	geneontology_Biological_Process	DTX3L;EZR
GO:1905668	positive regulation of protein localization to endosome	http://amigo.geneontology.org/amigo/term/GO:1905668	10	2	0.157254	12.7183	0.0102021	0.182387	7430;151636	geneontology_Biological_Process	DTX3L;EZR
GO:2001034	positive regulation of double-strand break repair via nonhomologous end joining	http://amigo.geneontology.org/amigo/term/GO:2001034	10	2	0.157254	12.7183	0.0102021	0.182387	83666;151636	geneontology_Biological_Process	DTX3L;PARP9
GO:0005347	ATP transmembrane transporter activity	http://amigo.geneontology.org/amigo/term/GO:0005347	10	2	0.157254	12.7183	0.0102021	0.182387	292;293	geneontology_Molecular_Function	SLC25A5;SLC25A6
hsa00072	Synthesis and degradation of ketone bodies	http://www.kegg.jp/kegg-bin/show_pathway?hsa00072+56898+622	10	2	0.157254	12.7183	0.0102021	0.182387	56898;622	pathway_KEGG	BDH1;BDH2
GO:0019320	hexose catabolic process	http://amigo.geneontology.org/amigo/term/GO:0019320	54	4	0.849171	4.71047	0.0102223	0.182387	226;2584;3098;5315	geneontology_Biological_Process	PKM;ALDOA;GALK1;HK1
GO:0017001	antibiotic catabolic process	http://amigo.geneontology.org/amigo/term/GO:0017001	54	4	0.849171	4.71047	0.0102223	0.182387	219;2878;25824;55577	geneontology_Biological_Process	PRDX5;NAGK;ALDH1B1;GPX3
GO:0034381	plasma lipoprotein particle clearance	http://amigo.geneontology.org/amigo/term/GO:0034381	54	4	0.849171	4.71047	0.0102223	0.182387	335;348;3069;3190	geneontology_Biological_Process	APOE;HDLBP;HNRNPK;APOA1
GO:0006403	RNA localization	http://amigo.geneontology.org/amigo/term/GO:0006403	228	9	3.58539	2.51019	0.0102397	0.182408	4600;5813;6059;7014;9961;10128;22916;23636;24148	geneontology_Biological_Process	ABCE1;MX2;NUP62;MVP;LRPPRC;NCBP2;PRPF6;PURA;TERF2
GO:0002888	positive regulation of myeloid leukocyte mediated immunity	http://amigo.geneontology.org/amigo/term/GO:0002888	29	3	0.456037	6.57842	0.0103918	0.184246	1653;9188;23586	geneontology_Biological_Process	DDX1;DDX58;DDX21
GO:0050690	regulation of defense response to virus by virus	http://amigo.geneontology.org/amigo/term/GO:0050690	29	3	0.456037	6.57842	0.0103918	0.184246	162;8907;51606	geneontology_Biological_Process	AP1B1;AP1M1;ATP6V1H
GO:0034367	protein-containing complex remodeling	http://amigo.geneontology.org/amigo/term/GO:0034367	29	3	0.456037	6.57842	0.0103918	0.184246	213;335;348	geneontology_Biological_Process	APOE;APOA1;ALB
GO:0009116	nucleoside metabolic process	http://amigo.geneontology.org/amigo/term/GO:0009116	117	6	1.83987	3.2611	0.010486	0.185624	191;471;1503;30833;50808;84245	geneontology_Biological_Process	NT5C;ATIC;CTPS1;MRI1;AK3;AHCY
GO:0002440	production of molecular mediator of immune response	http://amigo.geneontology.org/amigo/term/GO:0002440	190	8	2.98783	2.67753	0.0105417	0.186319	335;1653;2956;3098;5591;6778;9188;23586	geneontology_Biological_Process	DDX1;DDX58;HK1;APOA1;MSH6;PRKDC;DDX21;STAT6
GO:0034622	cellular protein-containing complex assembly	http://amigo.geneontology.org/amigo/term/GO:0034622	1073	27	16.8734	1.60016	0.0108321	0.191006	382;822;1653;2243;3122;4600;4678;4705;4735;7448;7458;8775;9555;10096;10565;23176;24139;24148;26523;28976;29766;55967;64425;64756;91942;192669;192670	geneontology_Biological_Process	AGO3;AGO1;ARF6;DDX1;EML2;FGA;MX2;NAPA;POLR1E;TMOD3;VTN;ACAD9;AGO4;ARFGEF1;ATPAF1;CAPG;NASP;ACTR3;NDUFA10;PRPF6;EIF4H;H2AFY;HLA-DRA;NDUFA12;NDUFAF2;SEPT2;SEPT8
GO:0050657	nucleic acid transport	http://amigo.geneontology.org/amigo/term/GO:0050657	191	8	3.00355	2.66351	0.0108576	0.191006	4600;5813;6059;7014;9961;10128;22916;23636	geneontology_Biological_Process	ABCE1;MX2;NUP62;MVP;LRPPRC;NCBP2;PURA;TERF2
GO:0050658	RNA transport	http://amigo.geneontology.org/amigo/term/GO:0050658	191	8	3.00355	2.66351	0.0108576	0.191006	4600;5813;6059;7014;9961;10128;22916;23636	geneontology_Biological_Process	ABCE1;MX2;NUP62;MVP;LRPPRC;NCBP2;PURA;TERF2
GO:0016684	oxidoreductase activity, acting on peroxide as acceptor	http://amigo.geneontology.org/amigo/term/GO:0016684	55	4	0.864897	4.62483	0.0108909	0.191247	2878;2938;25824;493869	geneontology_Molecular_Function	PRDX5;GPX8;GSTA1;GPX3
GO:0098754	detoxification	http://amigo.geneontology.org/amigo/term/GO:0098754	118	6	1.8556	3.23346	0.0109064	0.191247	213;348;2878;2938;25824;493869	geneontology_Biological_Process	APOE;PRDX5;GPX8;GSTA1;GPX3;ALB
GO:0097006	regulation of plasma lipoprotein particle levels	http://amigo.geneontology.org/amigo/term/GO:0097006	85	5	1.33666	3.74067	0.0109559	0.191247	213;335;348;3069;3190	geneontology_Biological_Process	APOE;HDLBP;HNRNPK;APOA1;ALB
GO:0000281	mitotic cytokinesis	http://amigo.geneontology.org/amigo/term/GO:0000281	85	5	1.33666	3.74067	0.0109559	0.191247	4735;10617;23176;23636;24137	geneontology_Biological_Process	NUP62;STAMBP;KIF4A;SEPT2;SEPT8
GO:1901342	regulation of vasculature development	http://amigo.geneontology.org/amigo/term/GO:1901342	313	11	4.92205	2.23484	0.010956	0.191247	301;306;727;729;1786;2969;5315;6774;7057;23576;26523	geneontology_Biological_Process	PKM;ANXA1;STAT3;AGO1;C5;C6;DDAH1;THBS1;ANXA3;GTF2I;DNMT1
GO:0071407	cellular response to organic cyclic compound	http://amigo.geneontology.org/amigo/term/GO:0071407	536	16	8.42881	1.89825	0.0110186	0.192044	301;839;857;988;999;2729;2730;5469;6294;6774;7430;8886;9131;9667;23586;54464	geneontology_Biological_Process	ANXA1;STAT3;CASP6;CAV1;CDH1;DDX58;GCLC;GCLM;AIFM1;SAFB2;SAFB;CDC5L;MED1;XRN1;DDX18;EZR
GO:0042393	histone binding	http://amigo.geneontology.org/amigo/term/GO:0042393	192	8	3.01928	2.64964	0.0111804	0.194564	2956;4678;7913;9031;27000;83666;84656;151636	geneontology_Molecular_Function	GLYR1;DTX3L;PARP9;NASP;MSH6;DEK;DNAJC2;BAZ1B
GO:0140101	catalytic activity, acting on a tRNA	http://amigo.geneontology.org/amigo/term/GO:0140101	119	6	1.87132	3.20629	0.0113386	0.197013	16;10056;23395;51095;57038;79731	geneontology_Molecular_Function	NARS2;RARS2;TRNT1;FARSB;LARS2;AARS
GO:0010543	regulation of platelet activation	http://amigo.geneontology.org/amigo/term/GO:0010543	30	3	0.471762	6.35914	0.0114144	0.197116	18;348;2147	geneontology_Biological_Process	APOE;ABAT;F2
GO:0046949	fatty-acyl-CoA biosynthetic process	http://amigo.geneontology.org/amigo/term/GO:0046949	30	3	0.471762	6.35914	0.0114144	0.197116	2639;51703;197322	geneontology_Biological_Process	ACSL5;GCDH;ACSF3
GO:0015991	ATP hydrolysis coupled proton transport	http://amigo.geneontology.org/amigo/term/GO:0015991	30	3	0.471762	6.35914	0.0114144	0.197116	523;9296;51606	geneontology_Biological_Process	ATP6V1A;ATP6V1F;ATP6V1H
GO:0036442	proton-exporting ATPase activity	http://amigo.geneontology.org/amigo/term/GO:0036442	30	3	0.471762	6.35914	0.0114144	0.197116	523;9296;51606	geneontology_Molecular_Function	ATP6V1A;ATP6V1F;ATP6V1H
GO:0004869	cysteine-type endopeptidase inhibitor activity	http://amigo.geneontology.org/amigo/term/GO:0004869	56	4	0.880622	4.54224	0.011587	0.199791	197;3827;25824;65264	geneontology_Molecular_Function	PRDX5;AHSG;KNG1;UBE2Z
GO:1901568	fatty acid derivative metabolic process	http://amigo.geneontology.org/amigo/term/GO:1901568	156	7	2.45316	2.85346	0.0118146	0.203405	301;622;2639;51703;56898;79611;197322	geneontology_Biological_Process	ACSL5;ANXA1;BDH1;GCDH;ACSF3;ACSS3;BDH2
GO:0051236	establishment of RNA localization	http://amigo.geneontology.org/amigo/term/GO:0051236	194	8	3.05073	2.62233	0.0118474	0.203659	4600;5813;6059;7014;9961;10128;22916;23636	geneontology_Biological_Process	ABCE1;MX2;NUP62;MVP;LRPPRC;NCBP2;PURA;TERF2
GO:0043687	post-translational protein modification	http://amigo.geneontology.org/amigo/term/GO:0043687	360	12	5.66114	2.11971	0.0119189	0.204578	197;213;335;348;1356;2243;3698;3827;5721;7018;8542;81876	geneontology_Biological_Process	APOE;FGA;ITIH2;PSME2;RAB1B;AHSG;APOA1;APOL1;KNG1;TF;ALB;CP
GO:1903829	positive regulation of cellular protein localization	http://amigo.geneontology.org/amigo/term/GO:1903829	317	11	4.98495	2.20664	0.0119591	0.204957	382;999;2010;2147;3843;4035;5469;7430;23636;83666;151636	geneontology_Biological_Process	ARF6;CDH1;DTX3L;LRP1;NUP62;PARP9;IPO5;MED1;EMD;EZR;F2
GO:0045069	regulation of viral genome replication	http://amigo.geneontology.org/amigo/term/GO:0045069	87	5	1.36811	3.65468	0.0120351	0.20557	3428;6780;7153;7155;10318	geneontology_Biological_Process	IFI16;TNIP1;STAU1;TOP2A;TOP2B
GO:0045132	meiotic chromosome segregation	http://amigo.geneontology.org/amigo/term/GO:0045132	87	5	1.36811	3.65468	0.0120351	0.20557	7153;7155;10096;10592;192670	geneontology_Biological_Process	AGO4;TOP2A;ACTR3;TOP2B;SMC2
GO:0051129	negative regulation of cellular component organization	http://amigo.geneontology.org/amigo/term/GO:0051129	684	19	10.7562	1.76643	0.0120749	0.20557	292;335;348;382;822;857;1786;3980;3998;4035;7014;7057;7153;9555;10449;10565;24139;29766;54464	geneontology_Biological_Process	APOE;SLC25A5;ACAA2;ARF6;CAV1;EML2;LIG3;LMAN1;LRP1;THBS1;TMOD3;APOA1;ARFGEF1;CAPG;TOP2A;H2AFY;TERF2;XRN1;DNMT1
GO:0002478	antigen processing and presentation of exogenous peptide antigen	http://amigo.geneontology.org/amigo/term/GO:0002478	121	6	1.90277	3.15329	0.0122392	0.20557	162;2923;3122;3832;8907;24137	geneontology_Biological_Process	PDIA3;AP1B1;HLA-DRA;KIF11;KIF4A;AP1M1
GO:0051607	defense response to virus	http://amigo.geneontology.org/amigo/term/GO:0051607	235	9	3.69547	2.43542	0.0122991	0.20557	1653;3428;4600;6059;9188;10379;23586;83666;151636	geneontology_Biological_Process	IFI16;IRF9;ABCE1;DDX1;DDX58;DTX3L;MX2;PARP9;DDX21
GO:0072528	pyrimidine-containing compound biosynthetic process	http://amigo.geneontology.org/amigo/term/GO:0072528	57	4	0.896348	4.46255	0.0123111	0.20557	1503;1841;1854;8760	geneontology_Biological_Process	DUT;CTPS1;CDS2;DTYMK
GO:0002921	negative regulation of humoral immune response	http://amigo.geneontology.org/amigo/term/GO:0002921	11	2	0.172979	11.5621	0.0123407	0.20557	710;722	geneontology_Biological_Process	SERPING1;C4BPA
GO:0106074	aminoacyl-tRNA metabolism involved in translational fidelity	http://amigo.geneontology.org/amigo/term/GO:0106074	11	2	0.172979	11.5621	0.0123407	0.20557	16;23395	geneontology_Biological_Process	LARS2;AARS
GO:0033700	phospholipid efflux	http://amigo.geneontology.org/amigo/term/GO:0033700	11	2	0.172979	11.5621	0.0123407	0.20557	335;348	geneontology_Biological_Process	APOE;APOA1
GO:0033539	fatty acid beta-oxidation using acyl-CoA dehydrogenase	http://amigo.geneontology.org/amigo/term/GO:0033539	11	2	0.172979	11.5621	0.0123407	0.20557	2110;2639	geneontology_Biological_Process	ETFDH;GCDH
GO:0015867	ATP transport	http://amigo.geneontology.org/amigo/term/GO:0015867	11	2	0.172979	11.5621	0.0123407	0.20557	292;293	geneontology_Biological_Process	SLC25A5;SLC25A6
GO:0034370	triglyceride-rich lipoprotein particle remodeling	http://amigo.geneontology.org/amigo/term/GO:0034370	11	2	0.172979	11.5621	0.0123407	0.20557	335;348	geneontology_Biological_Process	APOE;APOA1
GO:0006527	arginine catabolic process	http://amigo.geneontology.org/amigo/term/GO:0006527	11	2	0.172979	11.5621	0.0123407	0.20557	23564;23576	geneontology_Biological_Process	DDAH2;DDAH1
GO:0071372	cellular response to follicle-stimulating hormone stimulus	http://amigo.geneontology.org/amigo/term/GO:0071372	11	2	0.172979	11.5621	0.0123407	0.20557	2729;2730	geneontology_Biological_Process	GCLC;GCLM
GO:0006048	UDP-N-acetylglucosamine biosynthetic process	http://amigo.geneontology.org/amigo/term/GO:0006048	11	2	0.172979	11.5621	0.0123407	0.20557	5238;55577	geneontology_Biological_Process	NAGK;PGM3
GO:0090646	mitochondrial tRNA processing	http://amigo.geneontology.org/amigo/term/GO:0090646	11	2	0.172979	11.5621	0.0123407	0.20557	3028;51095	geneontology_Biological_Process	HSD17B10;TRNT1
GO:0045091	regulation of single stranded viral RNA replication via double stranded DNA intermediate	http://amigo.geneontology.org/amigo/term/GO:0045091	11	2	0.172979	11.5621	0.0123407	0.20557	7153;7155	geneontology_Biological_Process	TOP2A;TOP2B
GO:0002161	aminoacyl-tRNA editing activity	http://amigo.geneontology.org/amigo/term/GO:0002161	11	2	0.172979	11.5621	0.0123407	0.20557	16;23395	geneontology_Molecular_Function	LARS2;AARS
GO:0016813	hydrolase activity, acting on carbon-nitrogen (but not peptide) bonds, in linear amidines	http://amigo.geneontology.org/amigo/term/GO:0016813	11	2	0.172979	11.5621	0.0123407	0.20557	23564;23576	geneontology_Molecular_Function	DDAH2;DDAH1
GO:1901565	organonitrogen compound catabolic process	http://amigo.geneontology.org/amigo/term/GO:1901565	1240	30	19.4995	1.5385	0.0123952	0.206172	18;191;259;348;593;644;645;722;857;999;1508;1854;2639;2729;3028;4035;5721;7430;7874;8697;8942;9097;23192;23475;23564;23576;30833;55349;65264;151636	geneontology_Biological_Process	APOE;CHDH;DDAH2;NT5C;BLVRB;CAV1;CDH1;DDAH1;DTX3L;DUT;GCDH;GCLC;HSD17B10;KYNU;LRP1;PSME2;QPRT;USP14;USP7;AMBP;BCKDHA;C4BPA;ABAT;ATG4B;UBE2Z;AHCY;BLVRA;CDC23;CTSB;EZR
GO:0098760	response to interleukin-7	http://amigo.geneontology.org/amigo/term/GO:0098760	31	3	0.487487	6.15401	0.012493	0.206885	471;2923;6774	geneontology_Biological_Process	STAT3;ATIC;PDIA3
GO:0098761	cellular response to interleukin-7	http://amigo.geneontology.org/amigo/term/GO:0098761	31	3	0.487487	6.15401	0.012493	0.206885	471;2923;6774	geneontology_Biological_Process	STAT3;ATIC;PDIA3
GO:0061082	myeloid leukocyte cytokine production	http://amigo.geneontology.org/amigo/term/GO:0061082	31	3	0.487487	6.15401	0.012493	0.206885	1653;9188;23586	geneontology_Biological_Process	DDX1;DDX58;DDX21
GO:1901215	negative regulation of neuron death	http://amigo.geneontology.org/amigo/term/GO:1901215	196	8	3.08218	2.59557	0.0125432	0.207412	16;348;2729;2730;4035;6416;6774;10617	geneontology_Biological_Process	APOE;STAT3;GCLC;GCLM;LRP1;MAP2K4;STAMBP;AARS
GO:0031047	gene silencing by RNA	http://amigo.geneontology.org/amigo/term/GO:0031047	122	6	1.9185	3.12745	0.0127078	0.209828	6774;22916;26523;55571;192669;192670	geneontology_Biological_Process	AGO3;STAT3;AGO1;CNOT11;AGO4;NCBP2
GO:0043523	regulation of neuron apoptotic process	http://amigo.geneontology.org/amigo/term/GO:0043523	197	8	3.0979	2.58239	0.0129021	0.212725	16;348;2729;2730;4035;6416;9131;10617	geneontology_Biological_Process	APOE;GCLC;GCLM;LRP1;MAP2K4;STAMBP;AIFM1;AARS
GO:0006839	mitochondrial transport	http://amigo.geneontology.org/amigo/term/GO:0006839	237	9	3.72692	2.41486	0.0129406	0.213048	292;293;3998;6774;10165;10449;10953;55750;131118	geneontology_Biological_Process	SLC25A5;SLC25A6;STAT3;ACAA2;LMAN1;AGK;DNAJC19;SLC25A13;TOMM34
GO:0033365	protein localization to organelle	http://amigo.geneontology.org/amigo/term/GO:0033365	888	23	13.9642	1.64707	0.0132635	0.217845	293;382;999;1434;1653;2147;3098;3843;3998;5469;5905;6774;7014;7430;9555;10005;10953;23636;26063;55750;83666;131118;151636	geneontology_Biological_Process	SLC25A6;STAT3;ARF6;CDH1;DDX1;DTX3L;HK1;LMAN1;NUP62;PARP9;RANGAP1;AGK;CSE1L;ACOT8;DECR2;DNAJC19;H2AFY;IPO5;MED1;TERF2;TOMM34;EZR;F2
GO:0006909	phagocytosis	http://amigo.geneontology.org/amigo/term/GO:0006909	238	9	3.74264	2.40472	0.0132705	0.217845	197;301;306;722;4035;7057;10096;10960;64005	geneontology_Biological_Process	ANXA1;LMAN2;LRP1;THBS1;AHSG;ANXA3;C4BPA;ACTR3;MYO1G
GO:0051241	negative regulation of multicellular organismal process	http://amigo.geneontology.org/amigo/term/GO:0051241	1143	28	17.9741	1.55779	0.013311	0.218192	18;197;301;307;335;348;382;397;710;714;1525;1786;2147;2243;2969;3827;4035;5340;5345;5469;6009;6774;7057;7430;7448;23586;26027;26523	geneontology_Biological_Process	ANXA1;APOE;STAT3;AGO1;ANXA4;ARF6;C1QC;DDX58;FGA;LRP1;PLG;SERPING1;THBS1;VTN;ACOT11;AHSG;APOA1;ARHGDIB;RHEB;GTF2I;ABAT;KNG1;MED1;SERPINF2;CXADR;DNMT1;EZR;F2
GO:0002444	myeloid leukocyte mediated immunity	http://amigo.geneontology.org/amigo/term/GO:0002444	548	16	8.61752	1.85668	0.0133634	0.218734	178;197;226;306;823;1508;1653;2147;3608;5199;5315;8907;9188;9961;23586;55004	geneontology_Biological_Process	PKM;ALDOA;CFP;DDX1;DDX58;LAMTOR1;AGL;AHSG;ANXA3;CAPN1;MVP;DDX21;ILF2;AP1M1;CTSB;F2
GO:0016241	regulation of macroautophagy	http://amigo.geneontology.org/amigo/term/GO:0016241	160	7	2.51606	2.78212	0.0134331	0.219239	523;823;826;6009;51606;55004;81876	geneontology_Biological_Process	LAMTOR1;RAB1B;CAPN1;CAPNS1;RHEB;ATP6V1A;ATP6V1H
hsa04218	Cellular senescence	http://www.kegg.jp/kegg-bin/show_pathway?hsa04218+292+293+3105+3106+3107+6009+823	160	7	2.51606	2.78212	0.0134331	0.219239	292;293;3105;3106;3107;6009;823	pathway_KEGG	SLC25A5;SLC25A6;HLA-A;HLA-B;HLA-C;CAPN1;RHEB
GO:0006007	glucose catabolic process	http://amigo.geneontology.org/amigo/term/GO:0006007	32	3	0.503213	5.96169	0.0136279	0.221141	226;3098;5315	geneontology_Biological_Process	PKM;ALDOA;HK1
GO:0009394	2'-deoxyribonucleotide metabolic process	http://amigo.geneontology.org/amigo/term/GO:0009394	32	3	0.503213	5.96169	0.0136279	0.221141	1841;1854;30833	geneontology_Biological_Process	NT5C;DUT;DTYMK
GO:0006356	regulation of transcription by RNA polymerase I	http://amigo.geneontology.org/amigo/term/GO:0006356	32	3	0.503213	5.96169	0.0136279	0.221141	5469;9555;55127	geneontology_Biological_Process	H2AFY;HEATR1;MED1
GO:0099131	ATP hydrolysis coupled ion transmembrane transport	http://amigo.geneontology.org/amigo/term/GO:0099131	32	3	0.503213	5.96169	0.0136279	0.221141	523;9296;51606	geneontology_Biological_Process	ATP6V1A;ATP6V1F;ATP6V1H
GO:0034470	ncRNA processing	http://amigo.geneontology.org/amigo/term/GO:0034470	367	12	5.77122	2.07928	0.0136979	0.221957	16;1653;3028;9097;9188;26523;51095;54663;55127;55661;192669;192670	geneontology_Biological_Process	AGO3;AGO1;DDX1;HSD17B10;USP14;AGO4;DDX27;TRNT1;DDX21;HEATR1;WDR74;AARS
GO:0032947	protein-containing complex scaffold activity	http://amigo.geneontology.org/amigo/term/GO:0032947	90	5	1.41529	3.53286	0.0137858	0.222742	857;4735;23176;23636;55004	geneontology_Molecular_Function	CAV1;LAMTOR1;NUP62;SEPT2;SEPT8
hsa05323	Rheumatoid arthritis	http://www.kegg.jp/kegg-bin/show_pathway?hsa05323+3122+4312+51606+523+9296	90	5	1.41529	3.53286	0.0137858	0.222742	3122;4312;51606;523;9296	pathway_KEGG	MMP1;ATP6V1A;ATP6V1F;HLA-DRA;ATP6V1H
GO:0098657	import into cell	http://amigo.geneontology.org/amigo/term/GO:0098657	792	21	12.4545	1.68614	0.0138731	0.223833	197;213;259;301;306;335;348;382;722;857;3190;4035;7018;7057;7430;7448;8542;10096;10960;51606;64005	geneontology_Biological_Process	ANXA1;APOE;LMAN2;ARF6;CAV1;HNRNPK;LRP1;THBS1;VTN;AHSG;AMBP;ANXA3;APOA1;APOL1;C4BPA;ACTR3;MYO1G;TF;ALB;ATP6V1H;EZR
GO:0051051	negative regulation of transport	http://amigo.geneontology.org/amigo/term/GO:0051051	458	14	7.20223	1.94384	0.013973	0.225123	18;292;301;307;335;382;392;857;3998;5905;7057;7430;10449;91942	geneontology_Biological_Process	ANXA1;SLC25A5;ACAA2;ANXA4;ARF6;CAV1;LMAN1;RANGAP1;THBS1;APOA1;ABAT;NDUFAF2;ARHGAP1;EZR
GO:0045765	regulation of angiogenesis	http://amigo.geneontology.org/amigo/term/GO:0045765	283	10	4.45029	2.24705	0.014416	0.230544	301;306;727;729;2969;5315;6774;7057;23576;26523	geneontology_Biological_Process	PKM;ANXA1;STAT3;AGO1;C5;C6;DDAH1;THBS1;ANXA3;GTF2I
GO:0060548	negative regulation of cell death	http://amigo.geneontology.org/amigo/term/GO:0060548	997	25	15.6782	1.59457	0.0145469	0.230544	16;213;292;301;307;348;857;1786;2243;2729;2730;3190;4035;5469;5591;6416;6774;7057;10449;10617;23564;23636;25824;65264;192670	geneontology_Biological_Process	ANXA1;APOE;DDAH2;PRDX5;SLC25A5;STAT3;ACAA2;ANXA4;CAV1;FGA;GCLC;GCLM;HNRNPK;LRP1;MAP2K4;NUP62;STAMBP;THBS1;AGO4;PRKDC;MED1;UBE2Z;AARS;ALB;DNMT1
GO:0031640	killing of cells of other organism	http://amigo.geneontology.org/amigo/term/GO:0031640	60	4	0.943524	4.23943	0.0146548	0.230544	213;735;2147;8542	geneontology_Biological_Process	APOL1;C9;ALB;F2
GO:0044364	disruption of cells of other organism	http://amigo.geneontology.org/amigo/term/GO:0044364	60	4	0.943524	4.23943	0.0146548	0.230544	213;735;2147;8542	geneontology_Biological_Process	APOL1;C9;ALB;F2
GO:0002562	somatic diversification of immune receptors via germline recombination within a single locus	http://amigo.geneontology.org/amigo/term/GO:0002562	60	4	0.943524	4.23943	0.0146548	0.230544	2956;3980;5591;6778	geneontology_Biological_Process	LIG3;MSH6;PRKDC;STAT6
GO:0016444	somatic cell DNA recombination	http://amigo.geneontology.org/amigo/term/GO:0016444	60	4	0.943524	4.23943	0.0146548	0.230544	2956;3980;5591;6778	geneontology_Biological_Process	LIG3;MSH6;PRKDC;STAT6
GO:0048306	calcium-dependent protein binding	http://amigo.geneontology.org/amigo/term/GO:0048306	60	4	0.943524	4.23943	0.0146548	0.230544	301;306;307;6277	geneontology_Molecular_Function	ANXA1;ANXA4;ANXA3;S100A6
GO:0016597	amino acid binding	http://amigo.geneontology.org/amigo/term/GO:0016597	60	4	0.943524	4.23943	0.0146548	0.230544	16;2729;23564;23576	geneontology_Molecular_Function	DDAH2;DDAH1;GCLC;AARS
GO:0006069	ethanol oxidation	http://amigo.geneontology.org/amigo/term/GO:0006069	12	2	0.188705	10.5986	0.0146565	0.230544	219;55902	geneontology_Biological_Process	ACSS2;ALDH1B1
GO:0032429	regulation of phospholipase A2 activity	http://amigo.geneontology.org/amigo/term/GO:0032429	12	2	0.188705	10.5986	0.0146565	0.230544	301;4035	geneontology_Biological_Process	ANXA1;LRP1
GO:0006568	tryptophan metabolic process	http://amigo.geneontology.org/amigo/term/GO:0006568	12	2	0.188705	10.5986	0.0146565	0.230544	2639;8942	geneontology_Biological_Process	GCDH;KYNU
GO:0031953	negative regulation of protein autophosphorylation	http://amigo.geneontology.org/amigo/term/GO:0031953	12	2	0.188705	10.5986	0.0146565	0.230544	857;9961	geneontology_Biological_Process	CAV1;MVP
GO:0099640	axo-dendritic protein transport	http://amigo.geneontology.org/amigo/term/GO:0099640	12	2	0.188705	10.5986	0.0146565	0.230544	5813;7014	geneontology_Biological_Process	PURA;TERF2
GO:0039692	single stranded viral RNA replication via double stranded DNA intermediate	http://amigo.geneontology.org/amigo/term/GO:0039692	12	2	0.188705	10.5986	0.0146565	0.230544	7153;7155	geneontology_Biological_Process	TOP2A;TOP2B
GO:0003995	acyl-CoA dehydrogenase activity	http://amigo.geneontology.org/amigo/term/GO:0003995	12	2	0.188705	10.5986	0.0146565	0.230544	2639;28976	geneontology_Molecular_Function	GCDH;ACAD9
GO:0016290	palmitoyl-CoA hydrolase activity	http://amigo.geneontology.org/amigo/term/GO:0016290	12	2	0.188705	10.5986	0.0146565	0.230544	10005;26027	geneontology_Molecular_Function	ACOT11;ACOT8
GO:0042975	peroxisome proliferator activated receptor binding	http://amigo.geneontology.org/amigo/term/GO:0042975	12	2	0.188705	10.5986	0.0146565	0.230544	1854;5469	geneontology_Molecular_Function	DUT;MED1
GO:0032355	response to estradiol	http://amigo.geneontology.org/amigo/term/GO:0032355	126	6	1.9814	3.02816	0.0147085	0.230719	301;6774;8854;8886;9131;53615	geneontology_Biological_Process	ANXA1;STAT3;AIFM1;ALDH1A2;MBD3;DDX18
GO:0017148	negative regulation of translation	http://amigo.geneontology.org/amigo/term/GO:0017148	126	6	1.9814	3.02816	0.0147085	0.230719	5813;6774;26523;54464;192669;192670	geneontology_Biological_Process	AGO3;STAT3;AGO1;AGO4;PURA;XRN1
GO:0019934	cGMP-mediated signaling	http://amigo.geneontology.org/amigo/term/GO:0019934	33	3	0.518938	5.78104	0.0148197	0.231499	348;5576;7057	geneontology_Biological_Process	APOE;PRKAR2A;THBS1
GO:0032801	receptor catabolic process	http://amigo.geneontology.org/amigo/term/GO:0032801	33	3	0.518938	5.78104	0.0148197	0.231499	348;823;151636	geneontology_Biological_Process	APOE;DTX3L;CAPN1
GO:0090662	ATP hydrolysis coupled transmembrane transport	http://amigo.geneontology.org/amigo/term/GO:0090662	33	3	0.518938	5.78104	0.0148197	0.231499	523;9296;51606	geneontology_Biological_Process	ATP6V1A;ATP6V1F;ATP6V1H
hsa04144	Endocytosis	http://www.kegg.jp/kegg-bin/show_pathway?hsa04144+10565+10617+3105+3106+3107+382+8027+84364+857	244	9	3.837	2.34558	0.0153827	0.239582	10565;10617;3105;3106;3107;382;8027;84364;857	pathway_KEGG	ARF6;CAV1;HLA-A;HLA-B;HLA-C;STAMBP;ARFGAP2;ARFGEF1;STAM
GO:0043434	response to peptide hormone	http://amigo.geneontology.org/amigo/term/GO:0043434	418	13	6.57322	1.97772	0.0154008	0.239582	197;301;523;857;988;2729;5315;5576;5591;5905;6774;9296;51606	geneontology_Biological_Process	PKM;ANXA1;STAT3;CAV1;GCLC;PRKAR2A;RANGAP1;AHSG;CDC5L;PRKDC;ATP6V1A;ATP6V1F;ATP6V1H
GO:0001819	positive regulation of cytokine production	http://amigo.geneontology.org/amigo/term/GO:0001819	418	13	6.57322	1.97772	0.0154008	0.239582	301;727;1653;3098;3428;4791;5345;5591;6774;6778;7057;9188;23586	geneontology_Biological_Process	NFKB2;ANXA1;IFI16;STAT3;C5;DDX1;DDX58;HK1;THBS1;PRKDC;DDX21;SERPINF2;STAT6
GO:0006879	cellular iron ion homeostasis	http://amigo.geneontology.org/amigo/term/GO:0006879	61	4	0.959249	4.16993	0.0154943	0.240706	22;523;1356;7018	geneontology_Biological_Process	ABCB7;ATP6V1A;TF;CP
GO:0042136	neurotransmitter biosynthetic process	http://amigo.geneontology.org/amigo/term/GO:0042136	93	5	1.46246	3.41889	0.0157002	0.242902	18;857;6697;23564;23576	geneontology_Biological_Process	DDAH2;CAV1;DDAH1;ABAT;SPR
GO:0015918	sterol transport	http://amigo.geneontology.org/amigo/term/GO:0015918	93	5	1.46246	3.41889	0.0157002	0.242902	335;348;857;4035;55004	geneontology_Biological_Process	APOE;CAV1;LAMTOR1;LRP1;APOA1
GO:0032092	positive regulation of protein binding	http://amigo.geneontology.org/amigo/term/GO:0032092	93	5	1.46246	3.41889	0.0157002	0.242902	348;857;4035;7448;151636	geneontology_Biological_Process	APOE;CAV1;DTX3L;LRP1;VTN
GO:0006869	lipid transport	http://amigo.geneontology.org/amigo/term/GO:0006869	331	11	5.20511	2.11331	0.0160296	0.246575	301;335;348;857;3069;3190;4035;7057;8542;23780;55004	geneontology_Biological_Process	ANXA1;APOE;APOL2;CAV1;HDLBP;HNRNPK;LAMTOR1;LRP1;THBS1;APOA1;APOL1
GO:0044242	cellular lipid catabolic process	http://amigo.geneontology.org/amigo/term/GO:0044242	205	8	3.22371	2.48162	0.0160499	0.246575	335;348;2110;2639;10005;10449;26063;56898	geneontology_Biological_Process	APOE;ACAA2;ETFDH;GCDH;APOA1;BDH2;ACOT8;DECR2
GO:0046434	organophosphate catabolic process	http://amigo.geneontology.org/amigo/term/GO:0046434	205	8	3.22371	2.48162	0.0160499	0.246575	226;1854;2584;3098;3939;5315;6774;30833	geneontology_Biological_Process	PKM;LDHA;NT5C;STAT3;ALDOA;DUT;GALK1;HK1
GO:0019692	deoxyribose phosphate metabolic process	http://amigo.geneontology.org/amigo/term/GO:0019692	34	3	0.534664	5.61101	0.0160686	0.246575	1841;1854;30833	geneontology_Biological_Process	NT5C;DUT;DTYMK
GO:0015988	energy coupled proton transmembrane transport, against electrochemical gradient	http://amigo.geneontology.org/amigo/term/GO:0015988	34	3	0.534664	5.61101	0.0160686	0.246575	523;9296;51606	geneontology_Biological_Process	ATP6V1A;ATP6V1F;ATP6V1H
GO:0044769	ATPase activity, coupled to transmembrane movement of ions, rotational mechanism	http://amigo.geneontology.org/amigo/term/GO:0044769	34	3	0.534664	5.61101	0.0160686	0.246575	523;9296;51606	geneontology_Molecular_Function	ATP6V1A;ATP6V1F;ATP6V1H
GO:0071901	negative regulation of protein serine/threonine kinase activity	http://amigo.geneontology.org/amigo/term/GO:0071901	129	6	2.02858	2.95774	0.0163458	0.250081	348;857;3843;5576;9555;23636	geneontology_Biological_Process	APOE;CAV1;NUP62;PRKAR2A;H2AFY;IPO5
GO:0019884	antigen processing and presentation of exogenous antigen	http://amigo.geneontology.org/amigo/term/GO:0019884	129	6	2.02858	2.95774	0.0163458	0.250081	162;2923;3122;3832;8907;24137	geneontology_Biological_Process	PDIA3;AP1B1;HLA-DRA;KIF11;KIF4A;AP1M1
GO:0006360	transcription by RNA polymerase I	http://amigo.geneontology.org/amigo/term/GO:0006360	62	4	0.974975	4.10267	0.0163636	0.250081	5469;9555;55127;64425	geneontology_Biological_Process	POLR1E;H2AFY;HEATR1;MED1
GO:0002699	positive regulation of immune effector process	http://amigo.geneontology.org/amigo/term/GO:0002699	206	8	3.23943	2.46957	0.0164792	0.251508	301;729;1653;2956;3098;6778;9188;23586	geneontology_Biological_Process	ANXA1;C6;DDX1;DDX58;HK1;MSH6;DDX21;STAT6
GO:0042326	negative regulation of phosphorylation	http://amigo.geneontology.org/amigo/term/GO:0042326	423	13	6.65184	1.95435	0.0168235	0.256416	197;259;348;857;3843;5576;5591;6774;7430;9555;9961;10318;23636	geneontology_Biological_Process	APOE;STAT3;TNIP1;CAV1;NUP62;PRKAR2A;AHSG;AMBP;MVP;PRKDC;H2AFY;IPO5;EZR
GO:0032488	Cdc42 protein signal transduction	http://amigo.geneontology.org/amigo/term/GO:0032488	13	2	0.20443	9.78329	0.0171433	0.257812	335;348	geneontology_Biological_Process	APOE;APOA1
GO:0009265	2'-deoxyribonucleotide biosynthetic process	http://amigo.geneontology.org/amigo/term/GO:0009265	13	2	0.20443	9.78329	0.0171433	0.257812	1841;1854	geneontology_Biological_Process	DUT;DTYMK
GO:0046385	deoxyribose phosphate biosynthetic process	http://amigo.geneontology.org/amigo/term/GO:0046385	13	2	0.20443	9.78329	0.0171433	0.257812	1841;1854	geneontology_Biological_Process	DUT;DTYMK
GO:0007100	mitotic centrosome separation	http://amigo.geneontology.org/amigo/term/GO:0007100	13	2	0.20443	9.78329	0.0171433	0.257812	3832;23636	geneontology_Biological_Process	NUP62;KIF11
GO:0035563	positive regulation of chromatin binding	http://amigo.geneontology.org/amigo/term/GO:0035563	13	2	0.20443	9.78329	0.0171433	0.257812	83666;151636	geneontology_Biological_Process	DTX3L;PARP9
GO:0006264	mitochondrial DNA replication	http://amigo.geneontology.org/amigo/term/GO:0006264	13	2	0.20443	9.78329	0.0171433	0.257812	3980;6742	geneontology_Biological_Process	LIG3;SSBP1
GO:0009223	pyrimidine deoxyribonucleotide catabolic process	http://amigo.geneontology.org/amigo/term/GO:0009223	13	2	0.20443	9.78329	0.0171433	0.257812	1854;30833	geneontology_Biological_Process	NT5C;DUT
GO:0046349	amino sugar biosynthetic process	http://amigo.geneontology.org/amigo/term/GO:0046349	13	2	0.20443	9.78329	0.0171433	0.257812	5238;55577	geneontology_Biological_Process	NAGK;PGM3
GO:0097617	annealing activity	http://amigo.geneontology.org/amigo/term/GO:0097617	13	2	0.20443	9.78329	0.0171433	0.257812	301;7458	geneontology_Molecular_Function	ANXA1;EIF4H
GO:0034236	protein kinase A catalytic subunit binding	http://amigo.geneontology.org/amigo/term/GO:0034236	13	2	0.20443	9.78329	0.0171433	0.257812	5576;7430	geneontology_Molecular_Function	PRKAR2A;EZR
GO:0030258	lipid modification	http://amigo.geneontology.org/amigo/term/GO:0030258	291	10	4.57609	2.18527	0.017182	0.258049	335;348;2110;2639;10005;10449;26063;55004;55750;56898	geneontology_Biological_Process	APOE;ACAA2;ETFDH;GCDH;LAMTOR1;AGK;APOA1;BDH2;ACOT8;DECR2
GO:0044786	cell cycle DNA replication	http://amigo.geneontology.org/amigo/term/GO:0044786	63	4	0.9907	4.03755	0.0172628	0.258576	2956;7014;8243;10735	geneontology_Biological_Process	MSH6;STAG2;SMC1A;TERF2
hsa04721	Synaptic vesicle cycle	http://www.kegg.jp/kegg-bin/show_pathway?hsa04721+51606+523+8775+9296	63	4	0.9907	4.03755	0.0172628	0.258576	51606;523;8775;9296	pathway_KEGG	NAPA;ATP6V1A;ATP6V1F;ATP6V1H
GO:0001937	negative regulation of endothelial cell proliferation	http://amigo.geneontology.org/amigo/term/GO:0001937	35	3	0.550389	5.45069	0.0173749	0.259567	348;857;7057	geneontology_Biological_Process	APOE;CAV1;THBS1
GO:0007223	Wnt signaling pathway, calcium modulating pathway	http://amigo.geneontology.org/amigo/term/GO:0007223	35	3	0.550389	5.45069	0.0173749	0.259567	26523;192669;192670	geneontology_Biological_Process	AGO3;AGO1;AGO4
GO:0019900	kinase binding	http://amigo.geneontology.org/amigo/term/GO:0019900	711	19	11.1808	1.69935	0.0174595	0.260486	162;857;988;1500;3832;3939;5340;5576;6009;6416;6774;7153;7155;7205;7430;9555;9961;10318;22974	geneontology_Molecular_Function	CTNND1;LDHA;STAT3;TNIP1;CAV1;MAP2K4;PLG;PRKAR2A;AP1B1;MVP;RHEB;TOP2A;CDC5L;TOP2B;TPX2;TRIP6;H2AFY;KIF11;EZR
GO:0006066	alcohol metabolic process	http://amigo.geneontology.org/amigo/term/GO:0006066	336	11	5.28373	2.08186	0.0177103	0.263878	219;335;348;2584;3069;6697;8542;8854;10449;23780;55902	geneontology_Biological_Process	APOE;ACAA2;ACSS2;APOL2;GALK1;HDLBP;ALDH1A2;ALDH1B1;APOA1;APOL1;SPR
GO:0034613	cellular protein localization	http://amigo.geneontology.org/amigo/term/GO:0034613	1815	40	28.5416	1.40146	0.0178189	0.265147	162;293;348;372;382;857;999;1434;1653;2010;2147;3098;3843;3998;4035;5469;5813;5905;6059;6774;7014;7430;8027;8775;8907;9555;10005;10953;22818;22820;22916;23636;26063;26958;55004;55750;81876;83666;131118;151636	geneontology_Biological_Process	COPG1;APOE;SLC25A6;STAT3;ABCE1;ARF6;CAV1;CDH1;COPZ1;DDX1;DTX3L;HK1;LAMTOR1;LMAN1;LRP1;NAPA;NUP62;PARP9;RAB1B;RANGAP1;AGK;AP1B1;ARCN1;CSE1L;ACOT8;DECR2;DNAJC19;NCBP2;PURA;H2AFY;IPO5;MED1;STAM;TERF2;TOMM34;AP1M1;COPG2;EMD;EZR;F2
GO:0070482	response to oxygen levels	http://amigo.geneontology.org/amigo/term/GO:0070482	337	11	5.29946	2.07568	0.0180616	0.268405	18;191;523;857;3939;5315;5351;7057;9131;10449;23576	geneontology_Biological_Process	PKM;LDHA;PLOD1;ACAA2;CAV1;DDAH1;THBS1;AIFM1;ABAT;ATP6V1A;AHCY
GO:1905952	regulation of lipid localization	http://amigo.geneontology.org/amigo/term/GO:1905952	132	6	2.07575	2.89052	0.0181049	0.268695	335;348;3190;4035;7057;55004	geneontology_Biological_Process	APOE;HNRNPK;LAMTOR1;LRP1;THBS1;APOA1
GO:0050710	negative regulation of cytokine secretion	http://amigo.geneontology.org/amigo/term/GO:0050710	64	4	1.00643	3.97446	0.0181923	0.268932	301;307;335;7430	geneontology_Biological_Process	ANXA1;ANXA4;APOA1;EZR
GO:0010257	NADH dehydrogenase complex assembly	http://amigo.geneontology.org/amigo/term/GO:0010257	64	4	1.00643	3.97446	0.0181923	0.268932	4705;28976;55967;91942	geneontology_Biological_Process	ACAD9;NDUFA10;NDUFA12;NDUFAF2
GO:0032981	mitochondrial respiratory chain complex I assembly	http://amigo.geneontology.org/amigo/term/GO:0032981	64	4	1.00643	3.97446	0.0181923	0.268932	4705;28976;55967;91942	geneontology_Biological_Process	ACAD9;NDUFA10;NDUFA12;NDUFAF2
GO:0043624	cellular protein complex disassembly	http://amigo.geneontology.org/amigo/term/GO:0043624	210	8	3.30233	2.42253	0.0182794	0.269866	822;6059;6150;7818;8775;29766;51069;55037	geneontology_Biological_Process	PTCD3;ABCE1;MRPL2;NAPA;TMOD3;CAPG;DAP3;MRPL23
GO:0016071	mRNA metabolic process	http://amigo.geneontology.org/amigo/term/GO:0016071	765	20	12.0299	1.66252	0.0184903	0.271963	988;1653;2962;3190;5469;6294;6774;9238;9667;22913;22916;23350;23589;23644;24148;26523;54464;55571;192669;192670	geneontology_Biological_Process	AGO3;STAT3;AGO1;CNOT11;DDX1;HNRNPK;TBRG4;AGO4;CARHSP1;RALY;SAFB2;SAFB;CDC5L;GTF2F1;NCBP2;PRPF6;EDC4;MED1;U2SURP;XRN1
GO:0019886	antigen processing and presentation of exogenous peptide antigen via MHC class II	http://amigo.geneontology.org/amigo/term/GO:0019886	97	5	1.52536	3.27791	0.0185178	0.271963	162;3122;3832;8907;24137	geneontology_Biological_Process	AP1B1;HLA-DRA;KIF11;KIF4A;AP1M1
GO:0032963	collagen metabolic process	http://amigo.geneontology.org/amigo/term/GO:0032963	97	5	1.52536	3.27791	0.0185178	0.271963	1508;2147;4312;5345;5351	geneontology_Biological_Process	MMP1;PLOD1;SERPINF2;CTSB;F2
GO:0006626	protein targeting to mitochondrion	http://amigo.geneontology.org/amigo/term/GO:0006626	97	5	1.52536	3.27791	0.0185178	0.271963	293;3998;10953;55750;131118	geneontology_Biological_Process	SLC25A6;LMAN1;AGK;DNAJC19;TOMM34
GO:0019882	antigen processing and presentation	http://amigo.geneontology.org/amigo/term/GO:0019882	171	7	2.68904	2.60316	0.018696	0.273252	162;2923;3122;3832;7057;8907;24137	geneontology_Biological_Process	PDIA3;THBS1;AP1B1;HLA-DRA;KIF11;KIF4A;AP1M1
GO:0072655	establishment of protein localization to mitochondrion	http://amigo.geneontology.org/amigo/term/GO:0072655	133	6	2.09148	2.86878	0.018719	0.273252	293;3098;3998;10953;55750;131118	geneontology_Biological_Process	SLC25A6;HK1;LMAN1;AGK;DNAJC19;TOMM34
GO:0019903	protein phosphatase binding	http://amigo.geneontology.org/amigo/term/GO:0019903	133	6	2.09148	2.86878	0.018719	0.273252	988;2962;6774;6778;6780;9961	geneontology_Molecular_Function	STAT3;STAU1;MVP;CDC5L;GTF2F1;STAT6
GO:0009262	deoxyribonucleotide metabolic process	http://amigo.geneontology.org/amigo/term/GO:0009262	36	3	0.566114	5.29928	0.0187388	0.273252	1841;1854;30833	geneontology_Biological_Process	NT5C;DUT;DTYMK
GO:0045070	positive regulation of viral genome replication	http://amigo.geneontology.org/amigo/term/GO:0045070	36	3	0.566114	5.29928	0.0187388	0.273252	6780;7153;7155	geneontology_Biological_Process	STAU1;TOP2A;TOP2B
GO:0000287	magnesium ion binding	http://amigo.geneontology.org/amigo/term/GO:0000287	211	8	3.31806	2.41105	0.0187507	0.273252	1854;2729;2956;5238;5315;6009;7153;10056	geneontology_Molecular_Function	PKM;DUT;GCLC;PGM3;RHEB;MSH6;TOP2A;FARSB
hsa05165	Human papillomavirus infection	http://www.kegg.jp/kegg-bin/show_pathway?hsa05165+10379+3105+3106+3107+51606+523+5315+6009+7057+7448+9296	339	11	5.33091	2.06344	0.0187798	0.273324	10379;3105;3106;3107;51606;523;5315;6009;7057;7448;9296	pathway_KEGG	PKM;IRF9;HLA-A;HLA-B;HLA-C;THBS1;VTN;RHEB;ATP6V1A;ATP6V1F;ATP6V1H
GO:0006809	nitric oxide biosynthetic process	http://amigo.geneontology.org/amigo/term/GO:0006809	65	4	1.02215	3.91332	0.0191524	0.277672	857;6697;23564;23576	geneontology_Biological_Process	DDAH2;CAV1;DDAH1;SPR
GO:0042306	regulation of protein import into nucleus	http://amigo.geneontology.org/amigo/term/GO:0042306	65	4	1.02215	3.91332	0.0191524	0.277672	999;3843;5469;23636	geneontology_Biological_Process	CDH1;NUP62;IPO5;MED1
GO:0032508	DNA duplex unwinding	http://amigo.geneontology.org/amigo/term/GO:0032508	65	4	1.02215	3.91332	0.0191524	0.277672	301;1653;5813;7153	geneontology_Biological_Process	ANXA1;DDX1;TOP2A;PURA
GO:0070727	cellular macromolecule localization	http://amigo.geneontology.org/amigo/term/GO:0070727	1825	40	28.6989	1.39378	0.0193179	0.279714	162;293;348;372;382;857;999;1434;1653;2010;2147;3098;3843;3998;4035;5469;5813;5905;6059;6774;7014;7430;8027;8775;8907;9555;10005;10953;22818;22820;22916;23636;26063;26958;55004;55750;81876;83666;131118;151636	geneontology_Biological_Process	COPG1;APOE;SLC25A6;STAT3;ABCE1;ARF6;CAV1;CDH1;COPZ1;DDX1;DTX3L;HK1;LAMTOR1;LMAN1;LRP1;NAPA;NUP62;PARP9;RAB1B;RANGAP1;AGK;AP1B1;ARCN1;CSE1L;ACOT8;DECR2;DNAJC19;NCBP2;PURA;H2AFY;IPO5;MED1;STAM;TERF2;TOMM34;AP1M1;COPG2;EMD;EZR;F2
GO:0034380	high-density lipoprotein particle assembly	http://amigo.geneontology.org/amigo/term/GO:0034380	14	2	0.220156	9.08449	0.0197953	0.282283	335;348	geneontology_Biological_Process	APOE;APOA1
GO:0046940	nucleoside monophosphate phosphorylation	http://amigo.geneontology.org/amigo/term/GO:0046940	14	2	0.220156	9.08449	0.0197953	0.282283	1841;50808	geneontology_Biological_Process	AK3;DTYMK
GO:0002829	negative regulation of type 2 immune response	http://amigo.geneontology.org/amigo/term/GO:0002829	14	2	0.220156	9.08449	0.0197953	0.282283	301;6778	geneontology_Biological_Process	ANXA1;STAT6
[truncated: 2,069 more rows]
