# Supplementary material for: Regulation of protein complex partners as a compensatory mechanism in aneuploid tumors
Source: eLife. 2022 May 16;11:e75526. doi: 10.7554/eLife.75526 (PMC9135399; doi:10.7554/eLife.75526)
Supplement: Supplementary file 3. — Standard residuals and p-values for the overlap between differentially abundant proteins on other chromosomes and partners of differentially abundant aneuploid proteins. [file elife-75526-supp3.xlsx]

## Sheet: Sheet 1
	Differentially abundant proteins on other chromosomes
Case	Partner	Proteins covered by CORUM	All proteins	Res/StdRes	p.value	Aneuploidy	Overlap	Ratio (Partners/All proteins)	Ratio (Partners/Proteins covered by CORUM)
BRCA_chr20	90	473	1403	2.39001875918531	0.0203803125659083	Amplification	Enrichment	0.0641483	0.190275
BRCA_chr21	36	298	847	3.79292022558439	0.000241778639270314	Amplification	Enrichment	0.042503	0.120805
BRCA_chr5	19	142	483	-1.25938033906403	0.252261446558647	Amplification	Depletion	0.0393375	0.133803
BRCA_chr7	3	129	408	-0.568698821176694	0.755901436546875	Amplification	Depletion	0.00735294	0.0232558
BRCA_chr8	13	119	383	3.12015759112415	0.00370129164722713	Amplification	Enrichment	0.0339426	0.109244
COREAD_chr13	41	401	1141	1.39520933702308	0.195651434361951	Amplification	Enrichment	0.0359334	0.102244
COREAD_chr20	85	401	1152	-0.0803418104743231	0.990972385406573	Amplification	Depletion	0.0737847	0.21197
COREAD_chr7	47	297	848	-1.19506053849077	0.265760912882135	Amplification	Depletion	0.0554245	0.158249
COREAD_chr8	23	244	748	1.32637574182227	0.232218142219685	Amplification	Enrichment	0.0307487	0.0942623
OV_chr12	17	162	450	-0.642231733929254	0.60764436904059	Amplification	Depletion	0.0377778	0.104938
OV_chr20	24	203	561	-1.21561161430737	0.267846245624481	Amplification	Depletion	0.0427807	0.118227
OV_chr3	5	120	366	0.846307967366213	0.573485215484584	Amplification	Enrichment	0.0136612	0.0416667
OV_chr7	10	133	290	0.659502595634936	0.638144873751539	Amplification	Enrichment	0.0344828	0.075188
BRCA_chr13	29	377	1234	1.35570277955647	0.214795313279209	Deletion	Enrichment	0.0235008	0.0769231
BRCA_chr14	56	426	1452	-1.0668973609533	0.320793776530361	Deletion	Depletion	0.0385675	0.131455
BRCA_chr15	8	250	885	-2.12522337474223	0.0466953029581841	Deletion	Depletion	0.00903955	0.032
BRCA_chr17	400	1190	3619	0.991583747771851	0.341985283282943	Deletion	Enrichment	0.110528	0.336134
BRCA_chr18	11	242	803	0.921130538054191	0.460262107720475	Deletion	Enrichment	0.0136986	0.0454545
BRCA_chr22	26	214	769	-0.497341144777804	0.694673277086461	Deletion	Depletion	0.0338101	0.121495
BRCA_chr4	54	420	1261	3.75861683780115	0.000250017458349487	Deletion	Enrichment	0.0428232	0.128571
COREAD_chr14	67	496	1465	2.02271674571131	0.0525345036150181	Deletion	Enrichment	0.0457338	0.135081
COREAD_chr15	55	293	812	-0.0308129763867358	0.999999999999989	Deletion	Depletion	0.067734	0.187713
COREAD_chr18	6	494	1299	-0.420862213100132	0.843325842626396	Deletion	Depletion	0.00461894	0.0121457
COREAD_chr21	8	214	511	3.38003156294393	0.00222972417650671	Deletion	Enrichment	0.0156556	0.0373832
COREAD_chr22	48	377	1013	6.42327433159716	2.97754179235287e-10	Deletion	Enrichment	0.047384	0.127321
COREAD_chr4	1	234	670	-0.155682283062021	0.999999999999948	Deletion	Depletion	0.00149254	0.0042735
OV_chr13	35	263	808	1.32523999423914	0.222493027154214	Deletion	Enrichment	0.0433168	0.13308
OV_chr15	36	282	786	-0.70423101401424	0.540082898759332	Deletion	Depletion	0.0458015	0.12766
OV_chr16	91	376	960	5.82965810654956	8.96492697410412e-09	Deletion	Enrichment	0.0947917	0.242021
OV_chr17	76	380	972	3.14780516757712	0.00215414497239423	Deletion	Enrichment	0.0781893	0.2
OV_chr18	15	172	512	-1.55380596957583	0.15164378947872	Deletion	Depletion	0.0292969	0.0872093
OV_chr22	207	761	1772	11.3720963955446	1.17292604429711e-29	Deletion	Enrichment	0.116817	0.272011
OV_chr4	150	624	1482	1.85058125540493	0.0729766768773308	Deletion	Enrichment	0.101215	0.240385
