# Supplementary material for: Regulation of protein complex partners as a compensatory mechanism in aneuploid tumors
Source: eLife. 2022 May 16;11:e75526. doi: 10.7554/eLife.75526 (PMC9135399; doi:10.7554/eLife.75526)
Supplement: Supplementary file 4. [file elife-75526-supp4.xlsx]

## Sheet: Amplification cases
Case	P-value	Observed PPIs	Number of proteins interacting with partners	Total number of proteins
COREAD chr7	0.002	701	344	841
COREAD chr8	0.02	218	162	738
COREAD chr13	0	448	296	1138
COREAD chr20	0	792	438	1146
BRCA chr5	0.02	256	152	479
BRCA chr7	0.79	81	62	408
BRCA chr8	0	55	45	377
BRCA chr20	0	681	400	1387
BRCA chr21	0.53	207	189	840
OV chr3	0.23	114	82	362
OV chr7	0.8	74	52	290
OV chr12	0.02	337	192	447
OV chr20	0	269	180	556

## Sheet: Deletion cases
Case	P-value	Observed PPIs	Number of proteins interacting with partners	Total number of proteins
BRCA chr13	0	421	307	1234
BRCA chr14	0	770	458	1452
BRCA chr15	0.06	293	211	885
BRCA chr17	0	4876	1870	3619
BRCA chr18	0	198	132	803
BRCA chr22	0.4	441	267	769
BRCA chr4	0.1	434	309	1261
COREAD chr14	0	619	379	1465
COREAD chr15	0.06	276	188	812
COREAD chr18	0.11	302	235	1299
COREAD chr21	0.16	75	72	511
COREAD chr22	0.37	292	215	1013
COREAD chr4	0.08	171	138	670
OV chr13	0	426	259	808
OV chr15	0	516	283	786
OV chr16	0.18	418	268	960
OV chr17	0.11	690	354	972
OV chr18	0.29	126	97	512
OV chr22	0.06	1142	660	1772
OV chr4	0.02	891	521	1482
