# Supplementary material for: Regulation of protein complex partners as a compensatory mechanism in aneuploid tumors
Source: eLife. 2022 May 16;11:e75526. doi: 10.7554/eLife.75526 (PMC9135399; doi:10.7554/eLife.75526)
Supplement: Supplementary file 5. [file elife-75526-supp5.xlsx]

## Sheet: Info_table1
Correlations between proteins of amplified chromosomes (show significant increase in their abundances) and their co-complex members of other chromosomes
Colnames	Explanation
Pair	Protein pair
DAP	Protein of amplified chromosome
Partner	Co-complex member of other chromosome
t.cor	mRNA level spearman correlation
t.p	P value for mRNA level spearman correlation
p.cor	Protein level spearman correlation
p.p	P value for protein level spearman correlation
Case	Cancer type and amplified chromosome
number_of_complexes_with_protein_A_and_B	Number of CORUM complexes two proteins found together
number_of_complexes_with_protein_A_or_B	Number of CORUM complexes at least one of them involved in
Number.complex	Number of CORUM complexes for DAP
Number.partner	Number of CORUM co-complex subunits for DAP
JaccardIndex	Co-occurrence frequency
Promiscuity	Promiscuity for DAP
Aggregation	Aggregation feature of DAP

## Sheet: table1
Pair	DAP	Partner	t.cor	t.p	p.cor	p.p	Case	number_of_complexes_with_protein_A_and_B	number_of_complexes_with_protein_A_or_B	Number.complex	Number.partner	JaccardIndex	Promiscuity	Aggregation
ABCB1_ANXA2	ABCB1	ANXA2	-0.25737	0.0154883	-0.192015	0.0730978	COREAD_chr7	1	2	2	5	0.5	Non-promiscuous	Non-aggregation prone
ABCF2_CDC5L	ABCF2	CDC5L	0.0244091	0.821405	0.350329	0.000819574	COREAD_chr7	1	5	1	17	0.2	Non-promiscuous	Non-aggregation prone
ABCF2_DDB1	ABCF2	DDB1	0.384035	5.24802e-05	0.0817956	0.406814	BRCA_chr7	1	28	1	17	0.0357143	Non-promiscuous	Non-aggregation prone
ABCF2_DDX23	ABCF2	DDX23	0.404033	1.91784e-05	0.136554	0.164824	BRCA_chr7	1	3	1	17	0.333333	Non-promiscuous	Non-aggregation prone
ABCF2_EEF1A1	ABCF2	EEF1A1	0.137561	0.201224	0.289359	0.00624995	COREAD_chr7	1	2	1	17	0.5	Non-promiscuous	Non-aggregation prone
ABCF2_EEF1G	ABCF2	EEF1G	-0.145926	0.137449	0.385766	4.82227e-05	BRCA_chr7	1	1	1	17	1	Non-promiscuous	Non-aggregation prone
ABCF2_EFTUD2	ABCF2	EFTUD2	0.41553	1.04347e-05	0.266566	0.00598289	BRCA_chr7	1	4	1	17	0.25	Non-promiscuous	Non-aggregation prone
ABCF2_HNRNPU	ABCF2	HNRNPU	0.303829	0.00400491	0.178539	0.0960535	COREAD_chr7	1	10	1	17	0.1	Non-promiscuous	Non-aggregation prone
ABCF2_HSPA5	ABCF2	HSPA5	0.0735849	0.455663	0.136886	0.163791	BRCA_chr7	1	8	1	17	0.125	Non-promiscuous	Non-aggregation prone
ABCF2_MATR3	ABCF2	MATR3	-0.000352224	0.997401	0.050064	0.643209	COREAD_chr7	1	3	1	17	0.333333	Non-promiscuous	Non-aggregation prone
ABCF2_MSH2	ABCF2	MSH2	0.530572	5.82766e-09	0.204852	0.0360588	BRCA_chr7	1	21	1	17	0.047619	Non-promiscuous	Non-aggregation prone
ABCF2_PFKL	ABCF2	PFKL	0.135659	0.207585	0.199177	0.0628262	COREAD_chr7	1	1	1	17	1	Non-promiscuous	Non-aggregation prone
ABCF2_PRPF8	ABCF2	PRPF8	0.285642	0.0031397	0.168629	0.0855068	BRCA_chr7	1	6	1	17	0.166667	Non-promiscuous	Non-aggregation prone
ABCF2_SFPQ	ABCF2	SFPQ	0.282361	0.00769028	0.0249479	0.817531	COREAD_chr7	1	8	1	17	0.125	Non-promiscuous	Non-aggregation prone
ABCF2_SNRNP200	ABCF2	SNRNP200	0.452519	1.25687e-06	0.305515	0.00152827	BRCA_chr7	1	3	1	17	0.333333	Non-promiscuous	Non-aggregation prone
ABCF2_SNW1	ABCF2	SNW1	0.196471	0.0665603	0.192972	0.0716512	COREAD_chr7	1	4	1	17	0.25	Non-promiscuous	Non-aggregation prone
ABCF2_TUBB	ABCF2	TUBB	0.424008	3.84421e-05	0.293307	0.00554746	COREAD_chr7	1	5	1	17	0.2	Non-promiscuous	Non-aggregation prone
ABCF2_UBR5	ABCF2	UBR5	0.203235	0.0375844	0.252146	0.00946271	BRCA_chr7	1	2	1	17	0.5	Non-promiscuous	Non-aggregation prone
ADA_SGF29	ADA	SGF29	-0.186448	0.0423285	-0.0615628	0.585085	OV_chr20	1	5	2	19	0.2	Non-promiscuous	Non-aggregation prone
ADA_TADA3	ADA	TADA3	0.109294	0.236724	-0.0691301	0.575368	OV_chr20	1	17	2	19	0.0588235	Non-promiscuous	Non-aggregation prone
ADA_TAF10	ADA	TAF10	0.0891112	0.335173	-0.081215	0.433979	OV_chr20	1	25	2	19	0.04	Non-promiscuous	Non-aggregation prone
ADA_TAF6L	ADA	TAF6L	0.101503	0.272023	-0.14431	0.182349	OV_chr20	1	13	2	19	0.0769231	Non-promiscuous	Non-aggregation prone
ADA_TRRAP	ADA	TRRAP	0.156822	0.0885253	-0.240733	0.0092385	OV_chr20	1	32	2	19	0.03125	Non-promiscuous	Non-aggregation prone
ADA_USP22	ADA	USP22	0.18466	0.0443817	-0.112366	0.283557	OV_chr20	1	4	2	19	0.25	Non-promiscuous	Non-aggregation prone
AGO2_EIF6	AGO2	EIF6	0.0741608	0.492278	0.154862	0.149679	COREAD_chr8	1	8	7	9	0.125	Promiscuous	Non-aggregation prone
AGO2_FXR1	AGO2	FXR1	0.518474	2.28731e-07	0.0400904	0.710747	COREAD_chr8	1	7	7	9	0.142857	Promiscuous	Non-aggregation prone
AGO2_HSP90AB1	AGO2	HSP90AB1	0.395689	0.000135751	-0.178438	0.0962438	COREAD_chr8	1	21	7	9	0.047619	Promiscuous	Non-aggregation prone
AGO2_MOV10	AGO2	MOV10	-0.0113592	0.916345	0.132651	0.217935	COREAD_chr8	1	9	7	9	0.111111	Promiscuous	Non-aggregation prone
AGO2_RPL7A	AGO2	RPL7A	-0.105931	0.32596	-0.128201	0.233908	COREAD_chr8	1	11	7	9	0.0909091	Promiscuous	Non-aggregation prone
AKAP9_PPP1CA	AKAP9	PPP1CA	-0.0151876	0.877789	-0.0223823	0.820709	BRCA_chr7	1	4	1	4	0.25	Non-promiscuous	Non-aggregation prone
AKAP9_PRKACA	AKAP9	PRKACA	0.199772	0.0293866	0.137751	0.135187	OV_chr7	1	2	1	4	0.5	Non-promiscuous	Non-aggregation prone
AKAP9_PRKAR2A	AKAP9	PRKAR2A	0.575399	1.35873e-10	0.343054	0.000340274	BRCA_chr7	1	7	1	4	0.142857	Non-promiscuous	Non-aggregation prone
APP_APBB1	APP	APBB1	0.15538	0.113479	0.0952416	0.333818	BRCA_chr21	2	14	13	13	0.142857	Promiscuous	Non-aggregation prone
APP_FOXO1	APP	FOXO1	0.21044	0.0311821	-0.121781	0.21588	BRCA_chr21	1	17	13	13	0.0588235	Promiscuous	Non-aggregation prone
APP_FOXO3	APP	FOXO3	0.0995439	0.312341	-0.191499	0.0503541	BRCA_chr21	1	19	13	13	0.0526316	Promiscuous	Non-aggregation prone
APP_FOXO4	APP	FOXO4	0.163467	0.0956711	0.00287166	0.976806	BRCA_chr21	1	14	13	13	0.0714286	Promiscuous	Non-aggregation prone
APP_KAT5	APP	KAT5	0.121823	0.215722	0.0396019	0.688348	BRCA_chr21	1	21	13	13	0.047619	Promiscuous	Non-aggregation prone
APP_MED12	APP	MED12	0.174694	0.0746861	-0.0708169	0.472836	BRCA_chr21	1	30	13	13	0.0333333	Promiscuous	Non-aggregation prone
APP_PSEN1	APP	PSEN1	0.0578271	0.55791	0.236394	0.0210897	BRCA_chr21	1	22	13	13	0.0454545	Promiscuous	Non-aggregation prone
APP_PSEN2	APP	PSEN2	0.0307174	0.755751	0.311566	0.00330814	BRCA_chr21	1	16	13	13	0.0625	Promiscuous	Non-aggregation prone
APP_TIMM23	APP	TIMM23	0.209983	0.0315581	-0.0558574	0.571422	BRCA_chr21	1	20	13	13	0.05	Promiscuous	Non-aggregation prone
APP_VDAC1	APP	VDAC1	0.0321169	0.744996	-0.313736	0.00111785	BRCA_chr21	1	17	13	13	0.0588235	Promiscuous	Non-aggregation prone
APPL1_AKT1	APPL1	AKT1	0.497607	8.53853e-09	0.183122	0.0462143	OV_chr3	2	9	2	3	0.222222	Non-promiscuous	Non-aggregation prone
APPL1_HDAC3	APPL1	HDAC3	0.194737	0.033815	-0.023742	0.800287	OV_chr3	1	16	2	3	0.0625	Non-promiscuous	Non-aggregation prone
ARL1_ARF1	ARL1	ARF1	0.0373522	0.686724	0.490714	1.46587e-08	OV_chr12	1	1	1	3	1	Non-promiscuous	Non-aggregation prone
ARL1_ARFIP2	ARL1	ARFIP2	0.0991525	0.283336	0.184466	0.0621367	OV_chr12	1	1	1	3	1	Non-promiscuous	Non-aggregation prone
ARL1_PKD2	ARL1	PKD2	-0.00144566	0.98755	0.111471	0.455693	OV_chr12	1	3	1	3	0.333333	Non-promiscuous	Non-aggregation prone
BAZ1B_ACTL6A	BAZ1B	ACTL6A	0.436741	2.09909e-05	0.144695	0.178613	COREAD_chr7	1	47	4	21	0.0212766	Non-promiscuous	Non-aggregation prone
BAZ1B_ARID1A	BAZ1B	ARID1A	0.456189	1.00477e-06	0.161673	0.0994172	BRCA_chr7	1	27	4	21	0.037037	Non-promiscuous	Non-aggregation prone
BAZ1B_CHAF1A	BAZ1B	CHAF1A	0.306552	0.00146989	0.0346569	0.725602	BRCA_chr7	1	9	4	21	0.111111	Non-promiscuous	Non-aggregation prone
BAZ1B_DDX21	BAZ1B	DDX21	0.629196	5.19367e-11	0.455088	8.40219e-06	COREAD_chr7	2	6	4	21	0.333333	Non-promiscuous	Non-aggregation prone
BAZ1B_DEK	BAZ1B	DEK	0.562485	1.17495e-08	0.321039	0.00229064	COREAD_chr7	2	5	4	21	0.4	Non-promiscuous	Non-aggregation prone
BAZ1B_ERCC6	BAZ1B	ERCC6	0.409828	1.4151e-05	0.140908	0.151641	BRCA_chr7	2	4	4	21	0.5	Non-promiscuous	Non-aggregation prone
BAZ1B_MYBBP1A	BAZ1B	MYBBP1A	0.344505	0.000319823	0.507827	3.21163e-08	BRCA_chr7	2	5	4	21	0.4	Non-promiscuous	Non-aggregation prone
BAZ1B_MYO1C	BAZ1B	MYO1C	0.339021	0.000403594	-0.131225	0.182092	BRCA_chr7	2	4	4	21	0.5	Non-promiscuous	Non-aggregation prone
BAZ1B_SF3B1	BAZ1B	SF3B1	0.550844	2.6868e-08	0.377588	0.000287099	COREAD_chr7	2	10	4	21	0.2	Non-promiscuous	Non-aggregation prone
BAZ1B_SMARCA2	BAZ1B	SMARCA2	0.352768	0.000223443	0.0784885	0.426108	BRCA_chr7	1	21	4	21	0.047619	Non-promiscuous	Non-aggregation prone
BAZ1B_SMARCA4	BAZ1B	SMARCA4	0.4647	5.91808e-07	0.305671	0.00151938	BRCA_chr7	1	33	4	21	0.030303	Non-promiscuous	Non-aggregation prone
BAZ1B_SMARCA5	BAZ1B	SMARCA5	0.550262	2.79777e-08	0.535286	7.73439e-08	COREAD_chr7	3	17	4	21	0.176471	Non-promiscuous	Non-aggregation prone
BAZ1B_SMARCB1	BAZ1B	SMARCB1	0.151862	0.157825	-0.0326098	0.762947	COREAD_chr7	1	43	4	21	0.0232558	Non-promiscuous	Non-aggregation prone
BAZ1B_SMARCC1	BAZ1B	SMARCC1	0.482345	1.88519e-07	0.141914	0.148712	BRCA_chr7	1	40	4	21	0.025	Non-promiscuous	Non-aggregation prone
BAZ1B_SMARCC2	BAZ1B	SMARCC2	0.288824	0.00635094	0.124407	0.248154	COREAD_chr7	1	40	4	21	0.025	Non-promiscuous	Non-aggregation prone
BAZ1B_SMARCD1	BAZ1B	SMARCD1	0.483993	1.68851e-07	0.0073191	0.94093	BRCA_chr7	1	31	4	21	0.0322581	Non-promiscuous	Non-aggregation prone
BAZ1B_SMARCE1	BAZ1B	SMARCE1	0.380085	0.000259577	0.155882	0.146982	COREAD_chr7	1	32	4	21	0.03125	Non-promiscuous	Non-aggregation prone
BAZ1B_SPEF2	BAZ1B	SPEF2	0.0699979	0.477983	-0.129011	0.215251	BRCA_chr7	1	4	4	21	0.25	Non-promiscuous	Non-aggregation prone
BAZ1B_SUPT16H	BAZ1B	SUPT16H	0.49209	9.74478e-08	0.240431	0.0134905	BRCA_chr7	1	11	4	21	0.0909091	Non-promiscuous	Non-aggregation prone
BAZ1B_TOP2B	BAZ1B	TOP2B	0.63462	3.15368e-11	0.448505	1.17413e-05	COREAD_chr7	1	6	4	21	0.166667	Non-promiscuous	Non-aggregation prone
BAZ1B_VDR	BAZ1B	VDR	0.410129	1.39275e-05	-0.0651655	0.528174	BRCA_chr7	1	6	4	21	0.166667	Non-promiscuous	Non-aggregation prone
BOD1_ASH2L	BOD1	ASH2L	0.426187	5.81617e-06	0.0107402	0.913409	BRCA_chr5	1	23	1	11	0.0434783	Non-promiscuous	Non-aggregation prone
BOD1_BOD1L1	BOD1	BOD1L1	0.38897	4.11831e-05	0.464814	5.87568e-07	BRCA_chr5	1	1	1	11	1	Non-promiscuous	Non-aggregation prone
BOD1_CXXC1	BOD1	CXXC1	0.322735	0.000785701	0.398362	2.56834e-05	BRCA_chr5	1	4	1	11	0.25	Non-promiscuous	Non-aggregation prone
BOD1_DPY30	BOD1	DPY30	0.233371	0.0165796	-0.197056	0.0439202	BRCA_chr5	1	11	1	11	0.0909091	Non-promiscuous	Non-aggregation prone
BOD1_HCFC1	BOD1	HCFC1	0.397636	2.66513e-05	0.0435725	0.65896	BRCA_chr5	1	12	1	11	0.0833333	Non-promiscuous	Non-aggregation prone
BOD1_HCFC2	BOD1	HCFC2	0.420558	7.93949e-06	0.29379	0.00235135	BRCA_chr5	1	3	1	11	0.333333	Non-promiscuous	Non-aggregation prone
BOD1_KDM6B	BOD1	KDM6B	0.222185	0.0227253	-0.283006	0.00790588	BRCA_chr5	1	25	1	11	0.04	Non-promiscuous	Non-aggregation prone
BOD1_OGT	BOD1	OGT	0.260046	0.00738351	-0.36892	0.000107691	BRCA_chr5	1	10	1	11	0.1	Non-promiscuous	Non-aggregation prone
BOD1_SETD1B	BOD1	SETD1B	0.30084	0.00181859	-0.0323793	0.754146	BRCA_chr5	1	2	1	11	0.5	Non-promiscuous	Non-aggregation prone
BOD1_WDR5	BOD1	WDR5	0.179235	0.0673291	-0.278665	0.00399531	BRCA_chr5	1	27	1	11	0.037037	Non-promiscuous	Non-aggregation prone
BOD1_WDR82	BOD1	WDR82	0.297367	0.00206562	0.339529	0.000395061	BRCA_chr5	1	4	1	11	0.25	Non-promiscuous	Non-aggregation prone
BRAF_CNKSR1	BRAF	CNKSR1	0.373575	8.66301e-05	0.238804	0.0141543	BRCA_chr7	1	9	6	7	0.111111	Promiscuous	Non-aggregation prone
BRAF_KSR1	BRAF	KSR1	0.311331	0.00122607	0.0952519	0.333765	BRCA_chr7	2	8	6	7	0.25	Promiscuous	Non-aggregation prone
BRAF_MAP2K1	BRAF	MAP2K1	0.256386	0.00829038	0.0532241	0.589722	BRCA_chr7	3	10	6	7	0.3	Promiscuous	Non-aggregation prone
BRAF_MAP2K2	BRAF	MAP2K2	0.110388	0.262276	0.109455	0.266356	BRCA_chr7	1	7	6	7	0.142857	Promiscuous	Non-aggregation prone
BRAF_RAF1	BRAF	RAF1	0.481474	1.99772e-07	0.173533	0.0766677	BRCA_chr7	3	14	6	7	0.214286	Promiscuous	Non-aggregation prone
BRAF_YWHAE	BRAF	YWHAE	0.299057	0.00194187	0.120682	0.220083	BRCA_chr7	2	11	6	7	0.181818	Promiscuous	Non-aggregation prone
BRAF_YWHAZ	BRAF	YWHAZ	0.000404313	0.996734	-0.0602011	0.54183	BRCA_chr7	1	7	6	7	0.142857	Promiscuous	Non-aggregation prone
CAND1_CUL1	CAND1	CUL1	0.328144	0.000269202	0.336932	0.000179056	OV_chr12	1	42	5	6	0.0238095	Non-promiscuous	Non-aggregation prone
CAND1_CUL2	CAND1	CUL2	0.491269	1.40402e-08	0.129533	0.160306	OV_chr12	1	11	5	6	0.0909091	Non-promiscuous	Non-aggregation prone
CAND1_CUL3	CAND1	CUL3	0.477553	3.98149e-08	0.506224	4.2716e-09	OV_chr12	1	25	5	6	0.04	Non-promiscuous	Non-aggregation prone
CAND1_CUL4A	CAND1	CUL4A	0.379063	2.12618e-05	0.0447159	0.629177	OV_chr12	1	25	5	6	0.04	Non-promiscuous	Non-aggregation prone
CAND1_CUL4B	CAND1	CUL4B	0.520375	1.31267e-09	0.176684	0.0545801	OV_chr12	1	12	5	6	0.0833333	Non-promiscuous	Non-aggregation prone
CAND1_RBX1	CAND1	RBX1	-0.223928	0.0143589	0.13488	0.232916	OV_chr12	5	49	5	6	0.102041	Non-promiscuous	Non-aggregation prone
CANX_DDOST	CANX	DDOST	0.0119739	0.903508	0.401959	2.13529e-05	BRCA_chr5	1	3	1	9	0.333333	Non-promiscuous	Non-aggregation prone
CANX_DERL1	CANX	DERL1	0.340794	0.000374531	0.414265	1.11696e-05	BRCA_chr5	1	8	1	9	0.125	Non-promiscuous	Non-aggregation prone
CANX_RPN1	CANX	RPN1	0.183703	0.0606744	0.689602	4.44089e-16	BRCA_chr5	1	3	1	9	0.333333	Non-promiscuous	Non-aggregation prone
CANX_RPN2	CANX	RPN2	0.366546	0.000120179	0.626726	8.57536e-13	BRCA_chr5	1	3	1	9	0.333333	Non-promiscuous	Non-aggregation prone
CANX_STT3A	CANX	STT3A	0.329867	0.000589536	0.649378	6.72795e-14	BRCA_chr5	1	2	1	9	0.5	Non-promiscuous	Non-aggregation prone
CANX_VCP	CANX	VCP	0.257755	0.00794037	-0.20537	0.035581	BRCA_chr5	1	13	1	9	0.0769231	Non-promiscuous	Non-aggregation prone
CDK5_CCND1	CDK5	CCND1	0.158532	0.106255	0.209583	0.0345034	BRCA_chr7	1	11	1	4	0.0909091	Non-promiscuous	Non-aggregation prone
CDK5_CDKN1A	CDK5	CDKN1A	-0.0337031	0.732865	-0.0413042	0.739989	BRCA_chr7	1	9	1	4	0.111111	Non-promiscuous	Non-aggregation prone
CDK5_PCNA	CDK5	PCNA	0.240411	0.0134988	0.321439	0.000827179	BRCA_chr7	1	32	1	4	0.03125	Non-promiscuous	Non-aggregation prone
COG3_COG1	COG3	COG1	0.0150048	0.889646	0.471895	3.46287e-06	COREAD_chr13	4	7	5	7	0.571429	Non-promiscuous	Non-aggregation prone
COG3_COG2	COG3	COG2	0.468282	4.20649e-06	0.659542	2.79377e-12	COREAD_chr13	5	5	5	7	1	Non-promiscuous	Non-aggregation prone
COG3_COG4	COG3	COG4	0.0672925	0.533324	0.519783	2.10649e-07	COREAD_chr13	5	5	5	7	1	Non-promiscuous	Non-aggregation prone
COG3_COG5	COG3	COG5	0.649414	7.68674e-12	0.199388	0.0625428	COREAD_chr13	3	10	5	7	0.3	Non-promiscuous	Non-aggregation prone
COG3_COG7	COG3	COG7	0.0374943	0.728726	0.293696	0.00548218	COREAD_chr13	3	10	5	7	0.3	Non-promiscuous	Non-aggregation prone
COG3_COG8	COG3	COG8	0.321422	0.00226144	0.204326	0.0561922	COREAD_chr13	4	8	5	7	0.5	Non-promiscuous	Non-aggregation prone
COG5_COG1	COG5	COG1	0.0285654	0.791634	0.160929	0.134174	COREAD_chr7	4	10	8	7	0.4	Promiscuous	Non-aggregation prone
COG5_COG2	COG5	COG2	0.620161	1.16713e-10	0.331014	0.00163216	COREAD_chr7	3	10	8	7	0.3	Promiscuous	Non-aggregation prone
COG5_COG4	COG5	COG4	-0.0309253	0.774859	0.326816	0.001885	COREAD_chr7	3	10	8	7	0.3	Promiscuous	Non-aggregation prone
COG5_COG7	COG5	COG7	-0.132454	0.218626	0.400741	0.000109284	COREAD_chr7	8	8	8	7	1	Promiscuous	Non-aggregation prone
COG5_COG8	COG5	COG8	0.208499	0.0512463	0.0138125	0.898366	COREAD_chr7	5	10	8	7	0.5	Promiscuous	Non-aggregation prone
COG6_COG1	COG6	COG1	-0.120126	0.264931	0.301138	0.00435773	COREAD_chr13	4	9	7	7	0.444444	Promiscuous	Non-aggregation prone
COG6_COG2	COG6	COG2	0.544909	4.04728e-08	0.519875	2.09431e-07	COREAD_chr13	3	9	7	7	0.333333	Promiscuous	Non-aggregation prone
COG6_COG4	COG6	COG4	-0.137808	0.200409	0.508825	4.15292e-07	COREAD_chr13	3	9	7	7	0.333333	Promiscuous	Non-aggregation prone
COG6_COG5	COG6	COG5	0.720175	2.66454e-15	0.328645	0.00177079	COREAD_chr13	7	8	7	7	0.875	Promiscuous	Non-aggregation prone
COG6_COG7	COG6	COG7	-0.218062	0.0412522	0.526399	1.38204e-07	COREAD_chr13	7	8	7	7	0.875	Promiscuous	Non-aggregation prone
COG6_COG8	COG6	COG8	0.0797436	0.460185	-0.0240258	0.824165	COREAD_chr13	5	9	7	7	0.555556	Promiscuous	Non-aggregation prone
CP_MPO	CP	MPO	0.0492879	0.594507	0.238285	0.00906349	OV_chr3	2	3	3	2	0.666667	Non-promiscuous	Non-aggregation prone
CPN2_CPN1	CPN2	CPN1	-0.0795353	0.389881	0.872184	0	OV_chr3	1	1	1	1	1	Non-promiscuous	Non-aggregation prone
CRNKL1_ACIN1	CRNKL1	ACIN1	0.334696	0.000198863	0.286733	0.00156944	OV_chr20	1	3	2	162	0.333333	Non-promiscuous	Aggregation prone
CRNKL1_ALYREF	CRNKL1	ALYREF	-0.00776955	0.933166	0.205676	0.0248308	OV_chr20	2	6	2	162	0.333333	Non-promiscuous	Aggregation prone
CRNKL1_AQR	CRNKL1	AQR	0.398255	7.27096e-06	0.535073	3.63395e-10	OV_chr20	2	2	2	162	1	Non-promiscuous	Aggregation prone
CRNKL1_BCAS2	CRNKL1	BCAS2	0.0662441	0.474117	0.440927	5.20001e-07	OV_chr20	1	4	2	162	0.25	Non-promiscuous	Aggregation prone
CRNKL1_BUD13	CRNKL1	BUD13	0.265098	0.00357211	0.0586748	0.578502	OV_chr20	1	2	2	162	0.5	Non-promiscuous	Aggregation prone
CRNKL1_BUD31	CRNKL1	BUD31	-0.0720054	0.436447	0.196055	0.032605	OV_chr20	1	2	2	162	0.5	Non-promiscuous	Aggregation prone
CRNKL1_CACTIN	CRNKL1	CACTIN	0.326948	0.000284302	0.178379	0.145563	OV_chr20	2	2	2	162	1	Non-promiscuous	Aggregation prone
CRNKL1_CD2BP2	CRNKL1	CD2BP2	0.252044	0.00568804	0.315936	0.000690323	OV_chr20	1	2	2	162	0.5	Non-promiscuous	Aggregation prone
CRNKL1_CDC40	CRNKL1	CDC40	0.475737	4.55517e-08	0.326175	0.00035263	OV_chr20	2	2	2	162	1	Non-promiscuous	Aggregation prone
CRNKL1_CDC5L	CRNKL1	CDC5L	0.432873	8.79835e-07	0.357933	6.42528e-05	OV_chr20	2	5	2	162	0.4	Non-promiscuous	Aggregation prone
CRNKL1_CDK12	CRNKL1	CDK12	0.393256	9.67815e-06	0.166128	0.0814053	OV_chr20	1	2	2	162	0.5	Non-promiscuous	Aggregation prone
CRNKL1_CFAP20	CRNKL1	CFAP20	-0.0337844	0.715292	0.0301142	0.757029	OV_chr20	1	2	2	162	0.5	Non-promiscuous	Aggregation prone
CRNKL1_CIRBP	CRNKL1	CIRBP	0.0430565	0.641968	0.0561886	0.543881	OV_chr20	1	2	2	162	0.5	Non-promiscuous	Aggregation prone
CRNKL1_CPSF6	CRNKL1	CPSF6	0.459258	1.49204e-07	0.393028	9.80406e-06	OV_chr20	1	6	2	162	0.166667	Non-promiscuous	Aggregation prone
CRNKL1_CWC15	CRNKL1	CWC15	-0.126998	0.168717	0.219435	0.0164946	OV_chr20	2	3	2	162	0.666667	Non-promiscuous	Aggregation prone
CRNKL1_CWC22	CRNKL1	CWC22	0.364307	4.64004e-05	0.258108	0.00623688	OV_chr20	2	2	2	162	1	Non-promiscuous	Aggregation prone
CRNKL1_CWC27	CRNKL1	CWC27	0.385764	1.47293e-05	0.405427	4.78503e-06	OV_chr20	1	2	2	162	0.5	Non-promiscuous	Aggregation prone
CRNKL1_DDX17	CRNKL1	DDX17	0.319463	0.000397987	0.448982	3.03148e-07	OV_chr20	1	4	2	162	0.25	Non-promiscuous	Aggregation prone
CRNKL1_DDX23	CRNKL1	DDX23	0.445029	3.95737e-07	0.446083	3.68708e-07	OV_chr20	2	3	2	162	0.666667	Non-promiscuous	Aggregation prone
CRNKL1_DDX39B	CRNKL1	DDX39B	0.169221	0.0657992	0.349188	9.9323e-05	OV_chr20	1	4	2	162	0.25	Non-promiscuous	Aggregation prone
CRNKL1_DDX3X	CRNKL1	DDX3X	0.334995	0.000196101	0.0378151	0.683049	OV_chr20	1	4	2	162	0.25	Non-promiscuous	Aggregation prone
CRNKL1_DDX41	CRNKL1	DDX41	0.0734582	0.427225	0.203629	0.0354042	OV_chr20	2	2	2	162	1	Non-promiscuous	Aggregation prone
CRNKL1_DDX46	CRNKL1	DDX46	0.346176	0.000115064	0.317455	0.00043494	OV_chr20	1	3	2	162	0.333333	Non-promiscuous	Aggregation prone
CRNKL1_DDX5	CRNKL1	DDX5	0.100883	0.274976	0.292537	0.00124466	OV_chr20	2	6	2	162	0.333333	Non-promiscuous	Aggregation prone
CRNKL1_DHX15	CRNKL1	DHX15	0.337787	0.000171982	0.302193	0.000837196	OV_chr20	1	6	2	162	0.166667	Non-promiscuous	Aggregation prone
CRNKL1_DHX16	CRNKL1	DHX16	0.49285	1.24139e-08	0.235166	0.0100388	OV_chr20	1	3	2	162	0.333333	Non-promiscuous	Aggregation prone
CRNKL1_DHX38	CRNKL1	DHX38	0.376171	2.48491e-05	0.131164	0.155063	OV_chr20	2	3	2	162	0.666667	Non-promiscuous	Aggregation prone
CRNKL1_DHX8	CRNKL1	DHX8	0.514101	2.22974e-09	0.357425	0.000109372	OV_chr20	2	2	2	162	1	Non-promiscuous	Aggregation prone
CRNKL1_DHX9	CRNKL1	DHX9	0.553611	6.57037e-11	0.498789	7.77336e-09	OV_chr20	1	10	2	162	0.1	Non-promiscuous	Aggregation prone
CRNKL1_DNAJC8	CRNKL1	DNAJC8	0.0200684	0.828496	0.106281	0.249973	OV_chr20	1	3	2	162	0.333333	Non-promiscuous	Aggregation prone
CRNKL1_EFTUD2	CRNKL1	EFTUD2	0.497878	8.35724e-09	0.52098	1.24655e-09	OV_chr20	2	4	2	162	0.5	Non-promiscuous	Aggregation prone
CRNKL1_EIF4A3	CRNKL1	EIF4A3	0.0131534	0.887097	0.396375	8.10095e-06	OV_chr20	2	11	2	162	0.181818	Non-promiscuous	Aggregation prone
CRNKL1_FRG1	CRNKL1	FRG1	-0.0505911	0.584785	0.0333998	0.718396	OV_chr20	1	2	2	162	0.5	Non-promiscuous	Aggregation prone
CRNKL1_GPATCH1	CRNKL1	GPATCH1	0.481719	2.91505e-08	0.260848	0.0165506	OV_chr20	1	2	2	162	0.5	Non-promiscuous	Aggregation prone
CRNKL1_HNRNPA1	CRNKL1	HNRNPA1	0.393626	9.47679e-06	0.371122	3.25107e-05	OV_chr20	1	3	2	162	0.333333	Non-promiscuous	Aggregation prone
CRNKL1_HNRNPA2B1	CRNKL1	HNRNPA2B1	0.317768	0.000428974	0.289382	0.00141268	OV_chr20	1	3	2	162	0.333333	Non-promiscuous	Aggregation prone
CRNKL1_HNRNPA3	CRNKL1	HNRNPA3	0.18283	0.0465692	0.27793	0.00221046	OV_chr20	1	2	2	162	0.5	Non-promiscuous	Aggregation prone
CRNKL1_HNRNPC	CRNKL1	HNRNPC	0.264364	0.00366895	0.418808	2.13498e-06	OV_chr20	1	4	2	162	0.25	Non-promiscuous	Aggregation prone
CRNKL1_HNRNPF	CRNKL1	HNRNPF	0.00605327	0.947906	0.171728	0.0618385	OV_chr20	1	4	2	162	0.25	Non-promiscuous	Aggregation prone
CRNKL1_HNRNPH1	CRNKL1	HNRNPH1	0.283777	0.00176285	0.447116	3.43938e-07	OV_chr20	1	7	2	162	0.142857	Non-promiscuous	Aggregation prone
CRNKL1_HNRNPK	CRNKL1	HNRNPK	0.375588	2.56395e-05	0.308126	0.000651746	OV_chr20	1	4	2	162	0.25	Non-promiscuous	Aggregation prone
CRNKL1_HNRNPM	CRNKL1	HNRNPM	0.394552	8.99053e-06	0.374405	2.73122e-05	OV_chr20	1	4	2	162	0.25	Non-promiscuous	Aggregation prone
CRNKL1_HNRNPR	CRNKL1	HNRNPR	0.467704	8.18597e-08	0.314207	0.00050144	OV_chr20	1	4	2	162	0.25	Non-promiscuous	Aggregation prone
CRNKL1_HNRNPU	CRNKL1	HNRNPU	0.413773	2.90431e-06	0.424939	1.45776e-06	OV_chr20	1	11	2	162	0.0909091	Non-promiscuous	Aggregation prone
CRNKL1_HTATSF1	CRNKL1	HTATSF1	0.33919	0.00016093	0.0292124	0.752479	OV_chr20	1	3	2	162	0.333333	Non-promiscuous	Aggregation prone
CRNKL1_IGF2BP3	CRNKL1	IGF2BP3	0.305754	0.000720815	0.302179	0.000837695	OV_chr20	1	2	2	162	0.5	Non-promiscuous	Aggregation prone
CRNKL1_IK	CRNKL1	IK	0.164222	0.0743142	0.316807	0.000447524	OV_chr20	1	2	2	162	0.5	Non-promiscuous	Aggregation prone
CRNKL1_ISY1	CRNKL1	ISY1	0.344837	0.000122779	0.361774	0.000110973	OV_chr20	2	2	2	162	1	Non-promiscuous	Aggregation prone
CRNKL1_LSM2	CRNKL1	LSM2	0.0465888	0.614871	0.275032	0.00246846	OV_chr20	2	5	2	162	0.4	Non-promiscuous	Aggregation prone
CRNKL1_LSM3	CRNKL1	LSM3	-0.128379	0.164094	0.237146	0.00972003	OV_chr20	2	4	2	162	0.5	Non-promiscuous	Aggregation prone
CRNKL1_LSM4	CRNKL1	LSM4	-0.0247258	0.78953	0.298851	0.00106416	OV_chr20	1	4	2	162	0.25	Non-promiscuous	Aggregation prone
CRNKL1_LSM6	CRNKL1	LSM6	-0.00784788	0.932494	0.26539	0.0035342	OV_chr20	1	4	2	162	0.25	Non-promiscuous	Aggregation prone
CRNKL1_LSM7	CRNKL1	LSM7	-0.218188	0.0171337	0.335022	0.000346801	OV_chr20	1	4	2	162	0.25	Non-promiscuous	Aggregation prone
CRNKL1_LUC7L3	CRNKL1	LUC7L3	0.0588164	0.525175	0.381783	1.8336e-05	OV_chr20	1	2	2	162	0.5	Non-promiscuous	Aggregation prone
CRNKL1_MAGOH	CRNKL1	MAGOH	-0.00969947	0.916618	0.473451	5.3903e-08	OV_chr20	2	12	2	162	0.166667	Non-promiscuous	Aggregation prone
CRNKL1_MFAP1	CRNKL1	MFAP1	0.446261	3.64319e-07	0.108873	0.242614	OV_chr20	1	2	2	162	0.5	Non-promiscuous	Aggregation prone
CRNKL1_MOV10	CRNKL1	MOV10	0.140393	0.127785	0.0926862	0.316066	OV_chr20	1	4	2	162	0.25	Non-promiscuous	Aggregation prone
CRNKL1_NCBP1	CRNKL1	NCBP1	0.314884	0.000486859	0.356089	7.05095e-05	OV_chr20	1	8	2	162	0.125	Non-promiscuous	Aggregation prone
CRNKL1_NCBP2	CRNKL1	NCBP2	0.249623	0.00618517	0.262456	0.00460229	OV_chr20	1	7	2	162	0.142857	Non-promiscuous	Aggregation prone
CRNKL1_NUDT21	CRNKL1	NUDT21	0.266814	0.00335442	0.407478	4.23778e-06	OV_chr20	1	6	2	162	0.166667	Non-promiscuous	Aggregation prone
CRNKL1_PABPC1	CRNKL1	PABPC1	-0.0158097	0.864496	0.0519727	0.574559	OV_chr20	2	6	2	162	0.333333	Non-promiscuous	Aggregation prone
CRNKL1_PLRG1	CRNKL1	PLRG1	0.113873	0.217536	0.319534	0.000396731	OV_chr20	2	4	2	162	0.5	Non-promiscuous	Aggregation prone
CRNKL1_PNN	CRNKL1	PNN	0.191283	0.0371681	0.268131	0.00319548	OV_chr20	1	2	2	162	0.5	Non-promiscuous	Aggregation prone
CRNKL1_PPIE	CRNKL1	PPIE	0.130779	0.156287	0.162363	0.0776982	OV_chr20	2	2	2	162	1	Non-promiscuous	Aggregation prone
CRNKL1_PPIH	CRNKL1	PPIH	-0.00470731	0.959478	0.163638	0.0753643	OV_chr20	1	2	2	162	0.5	Non-promiscuous	Aggregation prone
CRNKL1_PPIL1	CRNKL1	PPIL1	0.191511	0.0369386	0.252742	0.00555151	OV_chr20	2	2	2	162	1	Non-promiscuous	Aggregation prone
CRNKL1_PPIL2	CRNKL1	PPIL2	0.312277	0.00054527	-0.0295369	0.783492	OV_chr20	1	2	2	162	0.5	Non-promiscuous	Aggregation prone
CRNKL1_PPIL3	CRNKL1	PPIL3	-0.00766985	0.934022	0.0263994	0.775649	OV_chr20	2	2	2	162	1	Non-promiscuous	Aggregation prone
CRNKL1_PPM1G	CRNKL1	PPM1G	0.360212	5.72385e-05	0.211145	0.0211632	OV_chr20	1	2	2	162	0.5	Non-promiscuous	Aggregation prone
CRNKL1_PPWD1	CRNKL1	PPWD1	0.350954	9.10525e-05	0.239662	0.0105674	OV_chr20	2	2	2	162	1	Non-promiscuous	Aggregation prone
CRNKL1_PRPF18	CRNKL1	PRPF18	0.320567	0.00037893	0.233317	0.0260307	OV_chr20	1	2	2	162	0.5	Non-promiscuous	Aggregation prone
CRNKL1_PRPF19	CRNKL1	PRPF19	0.275146	0.00245782	0.406666	4.44692e-06	OV_chr20	2	4	2	162	0.5	Non-promiscuous	Aggregation prone
CRNKL1_PRPF3	CRNKL1	PRPF3	0.148711	0.106503	0.316636	0.000450898	OV_chr20	1	2	2	162	0.5	Non-promiscuous	Aggregation prone
CRNKL1_PRPF31	CRNKL1	PRPF31	0.218744	0.0168463	0.370389	3.37925e-05	OV_chr20	1	3	2	162	0.333333	Non-promiscuous	Aggregation prone
CRNKL1_PRPF4	CRNKL1	PRPF4	0.181769	0.047878	0.340101	0.000154106	OV_chr20	1	2	2	162	0.5	Non-promiscuous	Aggregation prone
CRNKL1_PRPF40A	CRNKL1	PRPF40A	0.303226	0.000801789	0.302122	0.00083969	OV_chr20	1	2	2	162	0.5	Non-promiscuous	Aggregation prone
CRNKL1_PRPF4B	CRNKL1	PRPF4B	0.281783	0.0019053	0.300698	0.000891018	OV_chr20	2	2	2	162	1	Non-promiscuous	Aggregation prone
CRNKL1_PRPF8	CRNKL1	PRPF8	0.48622	2.0717e-08	0.529234	6.09785e-10	OV_chr20	2	6	2	162	0.333333	Non-promiscuous	Aggregation prone
CRNKL1_PUF60	CRNKL1	PUF60	-0.0792195	0.391772	0.0381712	0.680227	OV_chr20	1	3	2	162	0.333333	Non-promiscuous	Aggregation prone
CRNKL1_RBM15	CRNKL1	RBM15	0.29901	0.00095555	0.196952	0.0318021	OV_chr20	1	2	2	162	0.5	Non-promiscuous	Aggregation prone
CRNKL1_RBM17	CRNKL1	RBM17	0.364072	4.69664e-05	0.327119	0.000282098	OV_chr20	1	3	2	162	0.333333	Non-promiscuous	Aggregation prone
CRNKL1_RBM22	CRNKL1	RBM22	0.207819	0.0233333	0.30366	0.000787308	OV_chr20	2	2	2	162	1	Non-promiscuous	Aggregation prone
CRNKL1_RBM25	CRNKL1	RBM25	0.0731947	0.428889	0.207357	0.0236499	OV_chr20	1	2	2	162	0.5	Non-promiscuous	Aggregation prone
CRNKL1_RBM8A	CRNKL1	RBM8A	0.361487	5.3634e-05	0.385864	1.46482e-05	OV_chr20	2	15	2	162	0.133333	Non-promiscuous	Aggregation prone
CRNKL1_RBMX	CRNKL1	RBMX	0.228614	0.0123922	0.389097	1.22347e-05	OV_chr20	1	3	2	162	0.333333	Non-promiscuous	Aggregation prone
CRNKL1_RNPS1	CRNKL1	RNPS1	0.301317	0.000868348	0.357969	6.41372e-05	OV_chr20	1	7	2	162	0.142857	Non-promiscuous	Aggregation prone
CRNKL1_SART1	CRNKL1	SART1	0.255306	0.0050747	0.367063	4.02219e-05	OV_chr20	2	2	2	162	1	Non-promiscuous	Aggregation prone
CRNKL1_SF1	CRNKL1	SF1	0.391504	1.06866e-05	0.288627	0.00145583	OV_chr20	1	2	2	162	0.5	Non-promiscuous	Aggregation prone
CRNKL1_SF3A1	CRNKL1	SF3A1	0.387844	1.31221e-05	0.347237	0.000109272	OV_chr20	2	5	2	162	0.4	Non-promiscuous	Aggregation prone
CRNKL1_SF3A2	CRNKL1	SF3A2	0.0626691	0.498349	0.219527	0.016448	OV_chr20	2	4	2	162	0.5	Non-promiscuous	Aggregation prone
CRNKL1_SF3A3	CRNKL1	SF3A3	0.257983	0.00461604	0.327282	0.00028	OV_chr20	2	4	2	162	0.5	Non-promiscuous	Aggregation prone
CRNKL1_SF3B1	CRNKL1	SF3B1	0.366265	4.19258e-05	0.488299	1.76634e-08	OV_chr20	2	8	2	162	0.25	Non-promiscuous	Aggregation prone
CRNKL1_SF3B2	CRNKL1	SF3B2	0.358603	6.21132e-05	0.26106	0.00413509	OV_chr20	2	6	2	162	0.333333	Non-promiscuous	Aggregation prone
CRNKL1_SF3B3	CRNKL1	SF3B3	0.345748	0.000117476	0.493042	1.22289e-08	OV_chr20	2	14	2	162	0.142857	Non-promiscuous	Aggregation prone
CRNKL1_SF3B4	CRNKL1	SF3B4	0.374256	2.7531e-05	0.248305	0.00647158	OV_chr20	1	6	2	162	0.166667	Non-promiscuous	Aggregation prone
CRNKL1_SF3B6	CRNKL1	SF3B6	0.0366472	0.692336	0.479547	3.43134e-08	OV_chr20	1	5	2	162	0.2	Non-promiscuous	Aggregation prone
CRNKL1_SLU7	CRNKL1	SLU7	0.0662584	0.474021	0.250112	0.0156089	OV_chr20	2	2	2	162	1	Non-promiscuous	Aggregation prone
CRNKL1_SMNDC1	CRNKL1	SMNDC1	0.130879	0.155969	0.185052	0.0439248	OV_chr20	1	3	2	162	0.333333	Non-promiscuous	Aggregation prone
CRNKL1_SMU1	CRNKL1	SMU1	0.120432	0.192015	0.32271	0.000344307	OV_chr20	1	2	2	162	0.5	Non-promiscuous	Aggregation prone
CRNKL1_SNRNP200	CRNKL1	SNRNP200	0.493961	1.13809e-08	0.594232	1.04716e-12	OV_chr20	2	3	2	162	0.666667	Non-promiscuous	Aggregation prone
CRNKL1_SNRNP27	CRNKL1	SNRNP27	0.209956	0.0219184	0.283653	0.00586403	OV_chr20	1	2	2	162	0.5	Non-promiscuous	Aggregation prone
CRNKL1_SNRNP40	CRNKL1	SNRNP40	0.181035	0.0488005	0.197009	0.0317517	OV_chr20	2	3	2	162	0.666667	Non-promiscuous	Aggregation prone
CRNKL1_SNRNP70	CRNKL1	SNRNP70	0.149373	0.104936	0.330986	0.000236264	OV_chr20	1	3	2	162	0.333333	Non-promiscuous	Aggregation prone
CRNKL1_SNRPA	CRNKL1	SNRPA	0.0672696	0.467285	0.360048	5.77178e-05	OV_chr20	1	6	2	162	0.166667	Non-promiscuous	Aggregation prone
CRNKL1_SNRPA1	CRNKL1	SNRPA1	-0.0391397	0.672573	0.454871	2.02509e-07	OV_chr20	2	5	2	162	0.4	Non-promiscuous	Aggregation prone
CRNKL1_SNRPC	CRNKL1	SNRPC	0.170951	0.0630436	0.31806	0.000423482	OV_chr20	1	2	2	162	0.5	Non-promiscuous	Aggregation prone
CRNKL1_SNRPD1	CRNKL1	SNRPD1	0.00635237	0.945336	0.447985	3.24333e-07	OV_chr20	2	17	2	162	0.117647	Non-promiscuous	Aggregation prone
CRNKL1_SNRPD2	CRNKL1	SNRPD2	-0.163039	0.0764524	0.387915	1.30701e-05	OV_chr20	2	13	2	162	0.153846	Non-promiscuous	Aggregation prone
CRNKL1_SNRPD3	CRNKL1	SNRPD3	0.0802735	0.385483	0.405647	4.72306e-06	OV_chr20	2	16	2	162	0.125	Non-promiscuous	Aggregation prone
CRNKL1_SNRPE	CRNKL1	SNRPE	0.076086	0.410831	0.282044	0.0021598	OV_chr20	2	12	2	162	0.166667	Non-promiscuous	Aggregation prone
CRNKL1_SNRPF	CRNKL1	SNRPF	0.113937	0.217275	0.329704	0.00030131	OV_chr20	2	11	2	162	0.181818	Non-promiscuous	Aggregation prone
CRNKL1_SNRPG	CRNKL1	SNRPG	-0.0110098	0.905403	0.37985	2.39969e-05	OV_chr20	2	11	2	162	0.181818	Non-promiscuous	Aggregation prone
CRNKL1_SNU13	CRNKL1	SNU13	-0.00333998	0.971242	0.247686	0.0066103	OV_chr20	1	3	2	162	0.333333	Non-promiscuous	Aggregation prone
CRNKL1_SNW1	CRNKL1	SNW1	0.268687	0.00313053	0.248291	0.00647474	OV_chr20	2	4	2	162	0.5	Non-promiscuous	Aggregation prone
CRNKL1_SPEN	CRNKL1	SPEN	0.316408	0.000455433	-0.0153739	0.876901	OV_chr20	1	7	2	162	0.142857	Non-promiscuous	Aggregation prone
CRNKL1_SRRM1	CRNKL1	SRRM1	0.216949	0.0177903	0.0338841	0.714488	OV_chr20	2	9	2	162	0.222222	Non-promiscuous	Aggregation prone
CRNKL1_SRRM2	CRNKL1	SRRM2	0.389966	1.1653e-05	0.268438	0.00315953	OV_chr20	2	4	2	162	0.5	Non-promiscuous	Aggregation prone
CRNKL1_SRRT	CRNKL1	SRRT	0.294381	0.00115508	0.399737	6.67427e-06	OV_chr20	1	3	2	162	0.333333	Non-promiscuous	Aggregation prone
CRNKL1_SRSF1	CRNKL1	SRSF1	0.373501	2.86605e-05	0.375922	2.51836e-05	OV_chr20	2	5	2	162	0.4	Non-promiscuous	Aggregation prone
CRNKL1_SRSF11	CRNKL1	SRSF11	0.161936	0.0784934	0.227389	0.0128821	OV_chr20	1	2	2	162	0.5	Non-promiscuous	Aggregation prone
CRNKL1_SRSF2	CRNKL1	SRSF2	0.109101	0.237555	0.209158	0.0224377	OV_chr20	1	3	2	162	0.333333	Non-promiscuous	Aggregation prone
CRNKL1_SRSF3	CRNKL1	SRSF3	0.287708	0.00150996	0.423665	1.57908e-06	OV_chr20	1	2	2	162	0.5	Non-promiscuous	Aggregation prone
CRNKL1_SRSF4	CRNKL1	SRSF4	0.108033	0.242207	0.128692	0.163058	OV_chr20	1	3	2	162	0.333333	Non-promiscuous	Aggregation prone
CRNKL1_SRSF5	CRNKL1	SRSF5	0.0963467	0.297249	0.308866	0.000631454	OV_chr20	1	3	2	162	0.333333	Non-promiscuous	Aggregation prone
CRNKL1_SRSF7	CRNKL1	SRSF7	0.288677	0.00145294	0.254351	0.00524774	OV_chr20	1	3	2	162	0.333333	Non-promiscuous	Aggregation prone
CRNKL1_SRSF9	CRNKL1	SRSF9	0.401332	6.08352e-06	0.309222	0.000621906	OV_chr20	1	4	2	162	0.25	Non-promiscuous	Aggregation prone
CRNKL1_SYF2	CRNKL1	SYF2	0.143391	0.119767	-0.000810116	0.994023	OV_chr20	2	2	2	162	1	Non-promiscuous	Aggregation prone
CRNKL1_SYNCRIP	CRNKL1	SYNCRIP	0.331014	0.000235953	0.148319	0.107439	OV_chr20	1	5	2	162	0.2	Non-promiscuous	Aggregation prone
CRNKL1_TCERG1	CRNKL1	TCERG1	0.153276	0.0960639	0.247764	0.00659262	OV_chr20	1	2	2	162	0.5	Non-promiscuous	Aggregation prone
CRNKL1_TFIP11	CRNKL1	TFIP11	0.372775	2.97884e-05	0.331372	0.000358413	OV_chr20	2	5	2	162	0.4	Non-promiscuous	Aggregation prone
CRNKL1_THOC1	CRNKL1	THOC1	0.183129	0.0462057	0.185565	0.0433327	OV_chr20	1	5	2	162	0.2	Non-promiscuous	Aggregation prone
CRNKL1_THOC2	CRNKL1	THOC2	0.128785	0.162754	0.261494	0.00407092	OV_chr20	1	5	2	162	0.2	Non-promiscuous	Aggregation prone
CRNKL1_THOC3	CRNKL1	THOC3	-0.112577	0.222851	0.0451284	0.6275	OV_chr20	1	4	2	162	0.25	Non-promiscuous	Aggregation prone
CRNKL1_THOC5	CRNKL1	THOC5	0.33758	0.000173668	0.11013	0.239247	OV_chr20	1	5	2	162	0.2	Non-promiscuous	Aggregation prone
CRNKL1_THOC6	CRNKL1	THOC6	0.107442	0.244808	0.283371	0.00179104	OV_chr20	1	5	2	162	0.2	Non-promiscuous	Aggregation prone
CRNKL1_THOC7	CRNKL1	THOC7	-0.183549	0.0456991	0.124343	0.187465	OV_chr20	1	5	2	162	0.2	Non-promiscuous	Aggregation prone
CRNKL1_TRA2B	CRNKL1	TRA2B	0.330003	0.000247208	0.446432	3.60153e-07	OV_chr20	1	4	2	162	0.25	Non-promiscuous	Aggregation prone
CRNKL1_TXNL4A	CRNKL1	TXNL4A	0.123373	0.181306	0.33544	0.00041248	OV_chr20	1	2	2	162	0.5	Non-promiscuous	Aggregation prone
CRNKL1_U2AF1	CRNKL1	U2AF1	-0.0123985	0.893537	0.379497	2.07669e-05	OV_chr20	2	5	2	162	0.4	Non-promiscuous	Aggregation prone
CRNKL1_U2AF2	CRNKL1	U2AF2	0.217412	0.0175425	0.378906	2.1443e-05	OV_chr20	1	5	2	162	0.2	Non-promiscuous	Aggregation prone
CRNKL1_U2SURP	CRNKL1	U2SURP	0.297073	0.00103486	0.390436	1.13493e-05	OV_chr20	1	3	2	162	0.333333	Non-promiscuous	Aggregation prone
CRNKL1_USP39	CRNKL1	USP39	0.391796	1.0512e-05	0.469257	7.31779e-08	OV_chr20	1	2	2	162	0.5	Non-promiscuous	Aggregation prone
CRNKL1_WBP11	CRNKL1	WBP11	0.359977	5.79273e-05	0.381078	1.90556e-05	OV_chr20	1	2	2	162	0.5	Non-promiscuous	Aggregation prone
CRNKL1_WDR83	CRNKL1	WDR83	0.162057	0.0782674	0.064667	0.645488	OV_chr20	1	2	2	162	0.5	Non-promiscuous	Aggregation prone
CRNKL1_WTAP	CRNKL1	WTAP	0.284974	0.00168209	0.396553	8.01867e-06	OV_chr20	1	3	2	162	0.333333	Non-promiscuous	Aggregation prone
CRNKL1_XAB2	CRNKL1	XAB2	0.297913	0.000999743	0.41727	2.34669e-06	OV_chr20	2	2	2	162	1	Non-promiscuous	Aggregation prone
CRNKL1_ZCCHC8	CRNKL1	ZCCHC8	0.265375	0.00353604	0.324588	0.000509651	OV_chr20	1	3	2	162	0.333333	Non-promiscuous	Aggregation prone
CRNKL1_ZNF207	CRNKL1	ZNF207	0.473109	5.52713e-08	0.370645	3.33392e-05	OV_chr20	1	2	2	162	0.5	Non-promiscuous	Aggregation prone
CS_TAB1	CS	TAB1	0.422191	1.73132e-06	-0.202941	0.0310999	OV_chr12	1	4	1	2	0.25	Non-promiscuous	Non-aggregation prone
CS_TAB2	CS	TAB2	0.288136	0.00148456	0.115942	0.448188	OV_chr12	1	5	1	2	0.2	Non-promiscuous	Non-aggregation prone
CSE1L_KPNA2	CSE1L	KPNA2	0.260155	0.00427159	0.307314	0.000674676	OV_chr20	1	4	1	2	0.25	Non-promiscuous	Non-aggregation prone
CSE1L_RAN	CSE1L	RAN	0.267462	0.00327537	0.365247	4.41995e-05	OV_chr20	1	8	1	2	0.125	Non-promiscuous	Non-aggregation prone
CTSA_GALNS	CTSA	GALNS	0.369531	0.000104674	0.403214	2.00113e-05	BRCA_chr20	1	1	1	3	1	Non-promiscuous	Non-aggregation prone
CTSA_GLB1	CTSA	GLB1	0.27797	0.00409098	0.706531	0	BRCA_chr20	1	1	1	3	1	Non-promiscuous	Non-aggregation prone
CTSA_NEU1	CTSA	NEU1	0.319925	0.000878155	0.396061	2.88719e-05	BRCA_chr20	1	1	1	3	1	Non-promiscuous	Non-aggregation prone
CUL4A_CBX3	CUL4A	CBX3	0.565778	9.24412e-09	0.233931	0.0282625	COREAD_chr13	1	23	21	65	0.0434783	Promiscuous	Non-aggregation prone
CUL4A_CBX8	CUL4A	CBX8	-0.0347821	0.747667	0.0457601	0.672038	COREAD_chr13	1	24	21	65	0.0416667	Promiscuous	Non-aggregation prone
CUL4A_CENPB	CUL4A	CENPB	-0.182347	0.0890573	-0.0972471	0.3674	COREAD_chr13	1	22	21	65	0.0454545	Promiscuous	Non-aggregation prone
CUL4A_COBLL1	CUL4A	COBLL1	0.60093	6.01715e-10	0.123622	0.251175	COREAD_chr13	1	21	21	65	0.047619	Promiscuous	Non-aggregation prone
CUL4A_COPS2	CUL4A	COPS2	0.420116	4.60309e-05	0.131777	0.221011	COREAD_chr13	3	24	21	65	0.125	Promiscuous	Non-aggregation prone
CUL4A_COPS3	CUL4A	COPS3	0.151615	0.158509	-0.108801	0.312949	COREAD_chr13	3	23	21	65	0.130435	Promiscuous	Non-aggregation prone
CUL4A_COPS4	CUL4A	COPS4	0.237223	0.0260544	-0.124273	0.248667	COREAD_chr13	3	23	21	65	0.130435	Promiscuous	Non-aggregation prone
CUL4A_COPS5	CUL4A	COPS5	0.320841	0.0023058	0.0676889	0.530909	COREAD_chr13	3	23	21	65	0.130435	Promiscuous	Non-aggregation prone
CUL4A_COPS6	CUL4A	COPS6	-0.0399422	0.711769	-0.106598	0.322907	COREAD_chr13	3	23	21	65	0.130435	Promiscuous	Non-aggregation prone
CUL4A_COPS7A	CUL4A	COPS7A	-0.252703	0.0175317	-0.13257	0.218219	COREAD_chr13	3	23	21	65	0.130435	Promiscuous	Non-aggregation prone
CUL4A_COPS8	CUL4A	COPS8	0.46277	5.63598e-06	0.263841	0.0129976	COREAD_chr13	3	24	21	65	0.125	Promiscuous	Non-aggregation prone
CUL4A_CRBN	CUL4A	CRBN	0.499771	7.14884e-07	0.0396764	0.713604	COREAD_chr13	1	21	21	65	0.047619	Promiscuous	Non-aggregation prone
CUL4A_CUL4B	CUL4A	CUL4B	0.49005	1.25916e-06	0.763415	0	COREAD_chr13	1	28	21	65	0.0357143	Promiscuous	Non-aggregation prone
CUL4A_DDB1	CUL4A	DDB1	0.252404	0.0176704	0.191088	0.0745201	COREAD_chr13	19	30	21	65	0.633333	Promiscuous	Non-aggregation prone
CUL4A_DDB2	CUL4A	DDB2	-0.266088	0.012218	0.0718705	0.505778	COREAD_chr13	2	22	21	65	0.0909091	Promiscuous	Non-aggregation prone
CUL4A_DHX38	CUL4A	DHX38	0.0092635	0.931738	0.206761	0.0532607	COREAD_chr13	1	23	21	65	0.0434783	Promiscuous	Non-aggregation prone
CUL4A_EED	CUL4A	EED	0.297682	0.00485142	0.104343	0.333309	COREAD_chr13	1	28	21	65	0.0357143	Promiscuous	Non-aggregation prone
CUL4A_FBL	CUL4A	FBL	-0.00399775	0.970512	0.37283	0.00034711	COREAD_chr13	1	24	21	65	0.0416667	Promiscuous	Non-aggregation prone
CUL4A_GPS1	CUL4A	GPS1	-0.377197	0.000291646	0.0860769	0.425214	COREAD_chr13	3	25	21	65	0.12	Promiscuous	Non-aggregation prone
CUL4A_HSPA5	CUL4A	HSPA5	0.203022	0.0578157	-0.0668919	0.535769	COREAD_chr13	1	28	21	65	0.0357143	Promiscuous	Non-aggregation prone
CUL4A_HSPA8	CUL4A	HSPA8	0.144835	0.178188	0.0250556	0.816757	COREAD_chr13	1	36	21	65	0.0277778	Promiscuous	Non-aggregation prone
CUL4A_NUP93	CUL4A	NUP93	0.350252	0.000821912	0.0440223	0.683818	COREAD_chr13	1	21	21	65	0.047619	Promiscuous	Non-aggregation prone
CUL4A_POLR2A	CUL4A	POLR2A	-0.246821	0.0204345	-0.0802704	0.457217	COREAD_chr13	1	46	21	65	0.0217391	Promiscuous	Non-aggregation prone
CUL4A_RACGAP1	CUL4A	RACGAP1	0.275105	0.00948468	0.192817	0.0718835	COREAD_chr13	1	23	21	65	0.0434783	Promiscuous	Non-aggregation prone
CUL4A_RNF2	CUL4A	RNF2	0.400004	0.000112822	0.314925	0.00280389	COREAD_chr13	1	28	21	65	0.0357143	Promiscuous	Non-aggregation prone
CUL4A_RSF1	CUL4A	RSF1	0.640643	1.79146e-11	0.197252	0.0654646	COREAD_chr13	1	25	21	65	0.04	Promiscuous	Non-aggregation prone
CUL4A_SMARCA5	CUL4A	SMARCA5	0.467067	4.48867e-06	0.335984	0.00137275	COREAD_chr13	1	36	21	65	0.0277778	Promiscuous	Non-aggregation prone
CUL4A_SNRNP40	CUL4A	SNRNP40	0.156071	0.146487	0.198446	0.0638185	COREAD_chr13	1	23	21	65	0.0434783	Promiscuous	Non-aggregation prone
CUL4A_SRRT	CUL4A	SRRT	0.0373358	0.729829	0.345102	0.000991834	COREAD_chr13	1	22	21	65	0.0454545	Promiscuous	Non-aggregation prone
CUL4A_SSRP1	CUL4A	SSRP1	0.225388	0.0347425	-0.0327427	0.762009	COREAD_chr13	1	27	21	65	0.037037	Promiscuous	Non-aggregation prone
CUL4A_SUPT16H	CUL4A	SUPT16H	0.24668	0.0205088	-0.0876825	0.416597	COREAD_chr13	1	28	21	65	0.0357143	Promiscuous	Non-aggregation prone
CUL4A_WDR11	CUL4A	WDR11	0.35756	0.000626075	0.148443	0.167503	COREAD_chr13	1	21	21	65	0.047619	Promiscuous	Non-aggregation prone
CUL4A_WDR5	CUL4A	WDR5	0.210137	0.0494056	0.198159	0.0642111	COREAD_chr13	1	47	21	65	0.0212766	Promiscuous	Non-aggregation prone
CUL4A_WDR61	CUL4A	WDR61	0.0954704	0.376259	0.183597	0.0868491	COREAD_chr13	1	23	21	65	0.0434783	Promiscuous	Non-aggregation prone
CUL4A_WTAP	CUL4A	WTAP	0.504315	5.45383e-07	-0.0301681	0.78023	COREAD_chr13	1	22	21	65	0.0454545	Promiscuous	Non-aggregation prone
CUL4A_ZFP91	CUL4A	ZFP91	0.355271	0.000682268	0.0709017	0.511545	COREAD_chr13	1	21	21	65	0.047619	Promiscuous	Non-aggregation prone
CYCS_APAF1	CYCS	APAF1	-0.258581	0.00451878	-0.153931	0.0989882	OV_chr7	2	2	2	2	1	Non-promiscuous	Non-aggregation prone
DAG1_CAV1	DAG1	CAV1	-0.0332859	0.719316	0.235422	0.00995527	OV_chr3	1	7	2	5	0.142857	Non-promiscuous	Non-aggregation prone
DAG1_SGCE	DAG1	SGCE	0.0571927	0.536694	0.0618058	0.543366	OV_chr3	1	2	2	5	0.5	Non-promiscuous	Non-aggregation prone
DAG1_UTRN	DAG1	UTRN	0.368808	3.67183e-05	0.370303	3.39449e-05	OV_chr3	1	2	2	5	0.5	Non-promiscuous	Non-aggregation prone
DDX27_BOP1	DDX27	BOP1	0.472368	3.37533e-06	0.492206	1.11223e-06	COREAD_chr20	1	2	1	3	0.5	Non-promiscuous	Non-aggregation prone
DDX27_PES1	DDX27	PES1	0.209168	0.0504875	0.564648	1.00395e-08	COREAD_chr20	1	2	1	3	0.5	Non-promiscuous	Non-aggregation prone
DDX27_WDR12	DDX27	WDR12	0.172273	0.108498	0.331663	0.00159596	COREAD_chr20	1	2	1	3	0.5	Non-promiscuous	Non-aggregation prone
DIS3_EXOSC1	DIS3	EXOSC1	0.306365	0.0036959	0.246472	0.0206192	COREAD_chr13	2	3	2	10	0.666667	Non-promiscuous	Non-aggregation prone
DIS3_EXOSC10	DIS3	EXOSC10	0.331496	0.00160521	0.410576	7.09255e-05	COREAD_chr13	1	4	2	10	0.25	Non-promiscuous	Non-aggregation prone
DIS3_EXOSC2	DIS3	EXOSC2	0.318252	0.00251305	0.147631	0.169866	COREAD_chr13	2	4	2	10	0.5	Non-promiscuous	Non-aggregation prone
DIS3_EXOSC3	DIS3	EXOSC3	0.420327	4.55854e-05	0.260915	0.0140771	COREAD_chr13	2	3	2	10	0.666667	Non-promiscuous	Non-aggregation prone
DIS3_EXOSC4	DIS3	EXOSC4	-0.361206	0.000545271	0.189524	0.0769714	COREAD_chr13	2	4	2	10	0.5	Non-promiscuous	Non-aggregation prone
DIS3_EXOSC5	DIS3	EXOSC5	0.0943081	0.382124	0.0670949	0.534529	COREAD_chr13	2	3	2	10	0.666667	Non-promiscuous	Non-aggregation prone
DIS3_EXOSC6	DIS3	EXOSC6	0.278574	0.00858543	0.122193	0.256735	COREAD_chr13	2	3	2	10	0.666667	Non-promiscuous	Non-aggregation prone
DIS3_EXOSC7	DIS3	EXOSC7	-0.0393082	0.716148	0.0905788	0.401311	COREAD_chr13	2	3	2	10	0.666667	Non-promiscuous	Non-aggregation prone
DIS3_EXOSC9	DIS3	EXOSC9	0.454387	8.70982e-06	0.252338	0.017701	COREAD_chr13	2	3	2	10	0.666667	Non-promiscuous	Non-aggregation prone
DLD_DLST	DLD	DLST	0.246293	0.0207143	-0.0329512	0.76054	COREAD_chr7	1	1	1	3	1	Non-promiscuous	Non-aggregation prone
DNAJC3_DNAJB1	DNAJC3	DNAJB1	0.212655	0.0466818	0.165711	0.122838	COREAD_chr13	1	1	1	2	1	Non-promiscuous	Non-aggregation prone
DNAJC3_HSPA8	DNAJC3	HSPA8	0.215896	0.0433609	0.144908	0.177966	COREAD_chr13	1	16	1	2	0.0625	Non-promiscuous	Non-aggregation prone
DSN1_CBX5	DSN1	CBX5	0.290193	0.00267424	0.0294215	0.765752	BRCA_chr20	1	2	1	5	0.5	Non-promiscuous	Non-aggregation prone
DSN1_MIS12	DSN1	MIS12	0.298683	0.00196861	0.496848	7.00752e-08	BRCA_chr20	1	2	1	5	0.5	Non-promiscuous	Non-aggregation prone
DSN1_NSL1	DSN1	NSL1	0.153805	0.117232	0.505121	3.90252e-08	BRCA_chr20	1	1	1	5	1	Non-promiscuous	Non-aggregation prone
DSN1_PMF1	DSN1	PMF1	0.000124404	0.998995	-0.0303235	0.758787	BRCA_chr20	1	1	1	5	1	Non-promiscuous	Non-aggregation prone
DSN1_ZWINT	DSN1	ZWINT	0.619791	1.79523e-12	0.0467038	0.646201	BRCA_chr20	1	2	1	5	0.5	Non-promiscuous	Non-aggregation prone
DYNC1I1_BICD2	DYNC1I1	BICD2	0.0858283	0.383995	0.0973772	0.323042	BRCA_chr7	1	3	3	5	0.333333	Non-promiscuous	Non-aggregation prone
DYNC1I1_DCTN1	DYNC1I1	DCTN1	0.0530479	0.590956	0.107122	0.276741	BRCA_chr7	2	3	3	5	0.666667	Non-promiscuous	Non-aggregation prone
DYNC1I1_DYNC1H1	DYNC1I1	DYNC1H1	0.0816401	0.40771	-0.0332055	0.736664	BRCA_chr7	2	4	3	5	0.5	Non-promiscuous	Non-aggregation prone
DYNC1I1_DYNC1LI1	DYNC1I1	DYNC1LI1	0.0681837	0.489492	0.368806	0.000108262	BRCA_chr7	2	4	3	5	0.5	Non-promiscuous	Non-aggregation prone
DYNC1I1_DYNLL1	DYNC1I1	DYNLL1	0.0133112	0.892792	0.115592	0.240304	BRCA_chr7	2	5	3	5	0.4	Non-promiscuous	Non-aggregation prone
EEA1_RAB5A	EEA1	RAB5A	0.269235	0.00306757	0.270709	0.00290394	OV_chr12	2	3	2	5	0.666667	Non-promiscuous	Non-aggregation prone
EEA1_VPS11	EEA1	VPS11	0.126513	0.170361	0.192715	0.035746	OV_chr12	1	6	2	5	0.166667	Non-promiscuous	Non-aggregation prone
EEA1_VPS16	EEA1	VPS16	0.178821	0.0516755	0.258539	0.00452567	OV_chr12	1	9	2	5	0.111111	Non-promiscuous	Non-aggregation prone
EEA1_VPS18	EEA1	VPS18	0.34379	0.000129145	0.374754	2.68081e-05	OV_chr12	1	8	2	5	0.125	Non-promiscuous	Non-aggregation prone
EEA1_VPS39	EEA1	VPS39	0.344638	0.000123969	0.164621	0.0761206	OV_chr12	1	4	2	5	0.25	Non-promiscuous	Non-aggregation prone
EGFR_CBL	EGFR	CBL	0.333275	0.00150913	-0.115123	0.28549	COREAD_chr7	2	26	12	23	0.0769231	Promiscuous	Non-aggregation prone
EGFR_CDCP1	EGFR	CDCP1	0.112923	0.294859	0.0224503	0.835528	COREAD_chr7	1	13	12	23	0.0769231	Promiscuous	Non-aggregation prone
EGFR_EPS15	EGFR	EPS15	0.237945	0.0255902	0.146595	0.172916	COREAD_chr7	1	13	12	23	0.0769231	Promiscuous	Non-aggregation prone
EGFR_ERBB2	EGFR	ERBB2	0.03325	0.758434	0.208308	0.0514651	COREAD_chr7	1	15	12	23	0.0666667	Promiscuous	Non-aggregation prone
EGFR_GRB2	EGFR	GRB2	0.191187	0.0743666	-0.123992	0.249746	COREAD_chr7	1	27	12	23	0.037037	Promiscuous	Non-aggregation prone
EGFR_ITGAV	EGFR	ITGAV	0.268148	0.0115393	0.0302669	0.779529	COREAD_chr7	1	44	12	23	0.0227273	Promiscuous	Non-aggregation prone
EGFR_ITGB3	EGFR	ITGB3	0.130147	0.226825	0.10445	0.33281	COREAD_chr7	1	42	12	23	0.0238095	Promiscuous	Non-aggregation prone
EGFR_PIK3C2A	EGFR	PIK3C2A	0.462788	5.63076e-06	-0.0524303	0.627576	COREAD_chr7	1	12	12	23	0.0833333	Promiscuous	Non-aggregation prone
EGFR_PIK3C2B	EGFR	PIK3C2B	0.117749	0.274573	-0.00779674	0.942526	COREAD_chr7	1	12	12	23	0.0833333	Promiscuous	Non-aggregation prone
EGFR_PTEN	EGFR	PTEN	0.250713	0.0184713	0.00403363	0.970247	COREAD_chr7	1	12	12	23	0.0833333	Promiscuous	Non-aggregation prone
EGFR_RIN1	EGFR	RIN1	-0.00662182	0.951176	-0.0254698	0.813782	COREAD_chr7	1	14	12	23	0.0714286	Promiscuous	Non-aggregation prone
EGFR_SH3KBP1	EGFR	SH3KBP1	0.108062	0.316267	0.0536346	0.619682	COREAD_chr7	3	24	12	23	0.125	Promiscuous	Non-aggregation prone
EGFR_SLC9A3R1	EGFR	SLC9A3R1	0.0396252	0.713957	-0.0524662	0.62734	COREAD_chr7	1	19	12	23	0.0526316	Promiscuous	Non-aggregation prone
EGFR_SNX1	EGFR	SNX1	0.213078	0.0462371	0.0538074	0.618553	COREAD_chr7	1	21	12	23	0.047619	Promiscuous	Non-aggregation prone
EGFR_SNX2	EGFR	SNX2	0.22449	0.035491	-0.0744111	0.490815	COREAD_chr7	1	20	12	23	0.05	Promiscuous	Non-aggregation prone
EGFR_SNX4	EGFR	SNX4	0.276338	0.00915612	-0.108829	0.312824	COREAD_chr7	1	16	12	23	0.0625	Promiscuous	Non-aggregation prone
EGFR_STAM2	EGFR	STAM2	0.252809	0.017483	0.0607774	0.573768	COREAD_chr7	1	13	12	23	0.0769231	Promiscuous	Non-aggregation prone
EIF2B5_EIF2B1	EIF2B5	EIF2B1	0.218487	0.0169784	0.306124	0.000709605	OV_chr3	1	2	2	4	0.5	Non-promiscuous	Non-aggregation prone
EIF2B5_EIF2B2	EIF2B5	EIF2B2	0.222361	0.0150745	0.728835	0	OV_chr3	2	2	2	4	1	Non-promiscuous	Non-aggregation prone
EIF2B5_EIF2B3	EIF2B5	EIF2B3	0.257478	0.0046997	0.701731	0	OV_chr3	2	2	2	4	1	Non-promiscuous	Non-aggregation prone
EIF2B5_EIF2B4	EIF2B5	EIF2B4	0.390785	1.11287e-05	0.641689	3.77476e-15	OV_chr3	2	2	2	4	1	Non-promiscuous	Non-aggregation prone
EIF2S2_EIF2S1	EIF2S2	EIF2S1	0.425617	6.00395e-06	0.425098	6.17961e-06	BRCA_chr20	1	1	1	7	1	Non-promiscuous	Non-aggregation prone
EIF2S2_EIF2S3	EIF2S2	EIF2S3	0.286886	0.00300574	0.667935	7.10543e-15	BRCA_chr20	1	1	1	7	1	Non-promiscuous	Non-aggregation prone
EIF2S2_ILF2	EIF2S2	ILF2	0.404074	1.91371e-05	-0.271584	0.00507126	BRCA_chr20	1	4	1	7	0.25	Non-promiscuous	Non-aggregation prone
EIF2S2_ILF3	EIF2S2	ILF3	0.382822	5.56694e-05	0.377587	7.16231e-05	BRCA_chr20	1	7	1	7	0.142857	Non-promiscuous	Non-aggregation prone
EIF2S2_PRKDC	EIF2S2	PRKDC	0.445864	1.87391e-06	0.132438	0.17805	BRCA_chr20	1	15	1	7	0.0666667	Non-promiscuous	Non-aggregation prone
EIF2S2_XRCC5	EIF2S2	XRCC5	0.413933	1.13702e-05	-0.472019	3.71081e-07	BRCA_chr20	1	26	1	7	0.0384615	Non-promiscuous	Non-aggregation prone
EIF2S2_XRCC6	EIF2S2	XRCC6	0.511207	2.51185e-08	-0.42373	6.66692e-06	BRCA_chr20	1	28	1	7	0.0357143	Non-promiscuous	Non-aggregation prone
EIF3B_CTIF	EIF3B	CTIF	0.230715	0.0115899	-0.0956938	0.482949	OV_chr7	1	9	9	18	0.111111	Promiscuous	Non-aggregation prone
EIF3B_EIF3A	EIF3B	EIF3A	0.504629	4.86301e-09	0.812477	0	OV_chr7	5	9	9	18	0.555556	Promiscuous	Non-aggregation prone
EIF3B_EIF3C	EIF3B	EIF3C	0.39535	8.59056e-06	0.75814	0	OV_chr7	3	9	9	18	0.333333	Promiscuous	Non-aggregation prone
EIF3B_EIF3D	EIF3B	EIF3D	0.0895243	0.332928	0.760056	0	OV_chr7	2	9	9	18	0.222222	Promiscuous	Non-aggregation prone
EIF3B_EIF3E	EIF3B	EIF3E	-0.0994018	0.282121	0.77385	0	OV_chr7	2	9	9	18	0.222222	Promiscuous	Non-aggregation prone
EIF3B_EIF3F	EIF3B	EIF3F	0.158168	0.0857906	0.726136	0	OV_chr7	2	9	9	18	0.222222	Promiscuous	Non-aggregation prone
EIF3B_EIF3G	EIF3B	EIF3G	0.12056	0.191539	0.672568	0	OV_chr7	6	9	9	18	0.666667	Promiscuous	Non-aggregation prone
EIF3B_EIF3H	EIF3B	EIF3H	-0.0895314	0.33289	0.728123	0	OV_chr7	2	9	9	18	0.222222	Promiscuous	Non-aggregation prone
EIF3B_EIF3I	EIF3B	EIF3I	-0.0385558	0.677184	0.752663	0	OV_chr7	7	9	9	18	0.777778	Promiscuous	Non-aggregation prone
EIF3B_EIF3J	EIF3B	EIF3J	0.202436	0.0272502	0.117056	0.204864	OV_chr7	4	9	9	18	0.444444	Promiscuous	Non-aggregation prone
EIF3B_EIF3K	EIF3B	EIF3K	-0.0143071	0.877269	0.554487	6.04441e-11	OV_chr7	2	9	9	18	0.222222	Promiscuous	Non-aggregation prone
EIF3B_EIF3L	EIF3B	EIF3L	0.275737	0.00240332	0.761651	0	OV_chr7	2	10	9	18	0.2	Promiscuous	Non-aggregation prone
EIF3B_EIF3M	EIF3B	EIF3M	0.0496297	0.59195	0.632403	1.22125e-14	OV_chr7	1	9	9	18	0.111111	Promiscuous	Non-aggregation prone
EIF3B_EIF4A3	EIF3B	EIF4A3	0.0713217	0.440826	0.177119	0.0539788	OV_chr7	1	19	9	18	0.0526316	Promiscuous	Non-aggregation prone
EIF3B_NCBP1	EIF3B	NCBP1	0.336647	0.000181473	-0.071101	0.442246	OV_chr7	1	15	9	18	0.0666667	Promiscuous	Non-aggregation prone
EIF3B_NCBP2	EIF3B	NCBP2	0.308475	0.000642112	0.0474631	0.614466	OV_chr7	1	14	9	18	0.0714286	Promiscuous	Non-aggregation prone
EIF3B_UPF3B	EIF3B	UPF3B	0.335607	0.000190555	-0.0384335	0.701336	OV_chr7	1	17	9	18	0.0588235	Promiscuous	Non-aggregation prone
EIF3E_EIF3A	EIF3E	EIF3A	0.170527	0.0819953	-0.057091	0.562941	BRCA_chr8	2	5	2	12	0.4	Non-promiscuous	Non-aggregation prone
EIF3E_EIF3C	EIF3E	EIF3C	0.195148	0.0460471	0.258553	0.00774228	BRCA_chr8	2	3	2	12	0.666667	Non-promiscuous	Non-aggregation prone
EIF3E_EIF3D	EIF3E	EIF3D	0.357215	0.000183466	0.607278	6.50657e-12	BRCA_chr8	2	2	2	12	1	Non-promiscuous	Non-aggregation prone
EIF3E_EIF3F	EIF3E	EIF3F	0.459258	8.3157e-07	0.387249	4.48357e-05	BRCA_chr8	2	2	2	12	1	Non-promiscuous	Non-aggregation prone
EIF3E_EIF3G	EIF3E	EIF3G	0.153742	0.117382	0.0141924	0.885741	BRCA_chr8	2	6	2	12	0.333333	Non-promiscuous	Non-aggregation prone
EIF3E_EIF3I	EIF3E	EIF3I	0.132148	0.179011	0.501628	5.00639e-08	BRCA_chr8	2	7	2	12	0.285714	Non-promiscuous	Non-aggregation prone
EIF3E_EIF3J	EIF3E	EIF3J	0.137186	0.162858	-0.014576	0.882675	BRCA_chr8	2	4	2	12	0.5	Non-promiscuous	Non-aggregation prone
EIF3E_EIF3K	EIF3E	EIF3K	0.269749	0.00538919	0.47938	2.29509e-07	BRCA_chr8	2	2	2	12	1	Non-promiscuous	Non-aggregation prone
EIF3E_EIF3L	EIF3E	EIF3L	0.394599	3.10857e-05	0.765582	0	BRCA_chr8	2	3	2	12	0.666667	Non-promiscuous	Non-aggregation prone
EIF3E_EIF3M	EIF3E	EIF3M	0.29321	0.00240096	0.424591	6.35645e-06	BRCA_chr8	1	2	2	12	0.5	Non-promiscuous	Non-aggregation prone
EIF3H_EIF3A	EIF3H	EIF3A	0.229162	0.0186984	-0.201793	0.038989	BRCA_chr8	2	5	2	12	0.4	Non-promiscuous	Non-aggregation prone
EIF3H_EIF3C	EIF3H	EIF3C	0.337352	0.000432841	-0.0490877	0.618993	BRCA_chr8	2	3	2	12	0.666667	Non-promiscuous	Non-aggregation prone
EIF3H_EIF3D	EIF3H	EIF3D	0.332977	0.000518999	0.360294	0.000159789	BRCA_chr8	2	2	2	12	1	Non-promiscuous	Non-aggregation prone
EIF3H_EIF3F	EIF3H	EIF3F	0.327255	0.00065547	0.544049	1.99436e-09	BRCA_chr8	2	2	2	12	1	Non-promiscuous	Non-aggregation prone
EIF3H_EIF3G	EIF3H	EIF3G	0.224591	0.0212604	0.0699254	0.478441	BRCA_chr8	2	6	2	12	0.333333	Non-promiscuous	Non-aggregation prone
EIF3H_EIF3I	EIF3H	EIF3I	0.184118	0.060085	0.627659	7.7538e-13	BRCA_chr8	2	7	2	12	0.285714	Non-promiscuous	Non-aggregation prone
EIF3H_EIF3J	EIF3H	EIF3J	0.236336	0.0152147	0.0498963	0.613222	BRCA_chr8	2	4	2	12	0.5	Non-promiscuous	Non-aggregation prone
EIF3H_EIF3K	EIF3H	EIF3K	0.132034	0.17939	0.323264	0.000769331	BRCA_chr8	2	2	2	12	1	Non-promiscuous	Non-aggregation prone
EIF3H_EIF3L	EIF3H	EIF3L	0.434719	3.59018e-06	0.487653	1.31936e-07	BRCA_chr8	2	3	2	12	0.666667	Non-promiscuous	Non-aggregation prone
EIF3H_EIF3M	EIF3H	EIF3M	0.157008	0.109702	0.397989	2.6177e-05	BRCA_chr8	1	2	2	12	0.5	Non-promiscuous	Non-aggregation prone
EIF6_DICER1	EIF6	DICER1	-0.0559749	0.545416	0.139233	0.145002	OV_chr20	2	6	2	26	0.333333	Non-promiscuous	Non-aggregation prone
EIF6_MOV10	EIF6	MOV10	-0.0802191	0.457506	0.167476	0.118846	COREAD_chr20	2	3	2	26	0.666667	Non-promiscuous	Non-aggregation prone
EIF6_RPL10A	EIF6	RPL10A	0.134254	0.14548	0.158816	0.0844982	OV_chr20	1	5	2	26	0.2	Non-promiscuous	Non-aggregation prone
EIF6_RPL11	EIF6	RPL11	-0.0167659	0.87679	0.230745	0.0305481	COREAD_chr20	1	5	2	26	0.2	Non-promiscuous	Non-aggregation prone
EIF6_RPL12	EIF6	RPL12	0.0759572	0.481825	0.25087	0.0183959	COREAD_chr20	1	5	2	26	0.2	Non-promiscuous	Non-aggregation prone
EIF6_RPL13	EIF6	RPL13	0.510549	3.73803e-07	0.302304	0.00420153	COREAD_chr20	1	5	2	26	0.2	Non-promiscuous	Non-aggregation prone
EIF6_RPL14	EIF6	RPL14	0.0323529	0.726868	0.171585	0.0620582	OV_chr20	1	5	2	26	0.2	Non-promiscuous	Non-aggregation prone
EIF6_RPL15	EIF6	RPL15	0.0388121	0.675158	0.129668	0.159866	OV_chr20	1	5	2	26	0.2	Non-promiscuous	Non-aggregation prone
EIF6_RPL18A	EIF6	RPL18A	0.259519	0.0146189	0.296211	0.0050763	COREAD_chr20	1	5	2	26	0.2	Non-promiscuous	Non-aggregation prone
EIF6_RPL19	EIF6	RPL19	0.196435	0.0666101	0.121075	0.261148	COREAD_chr20	1	5	2	26	0.2	Non-promiscuous	Non-aggregation prone
EIF6_RPL21	EIF6	RPL21	0.0638015	0.490604	0.0740635	0.423415	OV_chr20	1	5	2	26	0.2	Non-promiscuous	Non-aggregation prone
EIF6_RPL27	EIF6	RPL27	0.0586099	0.526633	0.26111	0.00412768	OV_chr20	1	5	2	26	0.2	Non-promiscuous	Non-aggregation prone
EIF6_RPL28	EIF6	RPL28	0.458402	7.0808e-06	0.201989	0.0591285	COREAD_chr20	1	5	2	26	0.2	Non-promiscuous	Non-aggregation prone
EIF6_RPL30	EIF6	RPL30	0.0322888	0.727388	0.20438	0.0257756	OV_chr20	1	7	2	26	0.142857	Non-promiscuous	Non-aggregation prone
EIF6_RPL32	EIF6	RPL32	0.0153753	0.868185	0.273693	0.00259657	OV_chr20	1	5	2	26	0.2	Non-promiscuous	Non-aggregation prone
EIF6_RPL34	EIF6	RPL34	0.020396	0.82574	0.268972	0.00309768	OV_chr20	1	4	2	26	0.25	Non-promiscuous	Non-aggregation prone
EIF6_RPL35A	EIF6	RPL35A	0.154807	0.0927493	0.172518	0.0606307	OV_chr20	1	5	2	26	0.2	Non-promiscuous	Non-aggregation prone
EIF6_RPL36	EIF6	RPL36	0.055277	0.550445	0.146859	0.110983	OV_chr20	1	5	2	26	0.2	Non-promiscuous	Non-aggregation prone
EIF6_RPL37A	EIF6	RPL37A	0.0483692	0.601404	0.155761	0.0907298	OV_chr20	1	5	2	26	0.2	Non-promiscuous	Non-aggregation prone
EIF6_RPL7	EIF6	RPL7	0.145592	0.175906	0.346351	0.000947903	COREAD_chr20	1	5	2	26	0.2	Non-promiscuous	Non-aggregation prone
EIF6_RPL7A	EIF6	RPL7A	0.0667854	0.470504	0.243292	0.00767211	OV_chr20	2	5	2	26	0.4	Non-promiscuous	Non-aggregation prone
EIF6_RPLP1	EIF6	RPLP1	0.217041	0.0422356	0.106822	0.321885	COREAD_chr20	1	5	2	26	0.2	Non-promiscuous	Non-aggregation prone
EIF6_RPLP2	EIF6	RPLP2	0.158375	0.085377	0.0315838	0.733113	OV_chr20	1	5	2	26	0.2	Non-promiscuous	Non-aggregation prone
EIF6_TARBP2	EIF6	TARBP2	0.163282	0.0760105	0.0526489	0.642779	OV_chr20	1	5	2	26	0.2	Non-promiscuous	Non-aggregation prone
ERC1_CHUK	ERC1	CHUK	0.416052	2.52824e-06	-0.0845627	0.398094	OV_chr12	1	22	1	3	0.0454545	Non-promiscuous	Non-aggregation prone
ERC1_IKBKG	ERC1	IKBKG	0.311658	0.000560071	0.0319498	0.73922	OV_chr12	1	20	1	3	0.05	Non-promiscuous	Non-aggregation prone
ESYT2_ESYT1	ESYT2	ESYT1	0.0580994	0.590796	0.245659	0.0210545	COREAD_chr7	1	2	1	1	0.5	Non-promiscuous	Non-aggregation prone
EXOC4_EXOC1	EXOC4	EXOC1	0.222852	0.0368907	0.0168358	0.87628	COREAD_chr7	2	2	2	7	1	Non-promiscuous	Non-aggregation prone
EXOC4_EXOC2	EXOC4	EXOC2	0.437621	2.01125e-05	-0.0271499	0.801742	COREAD_chr7	2	2	2	7	1	Non-promiscuous	Non-aggregation prone
EXOC4_EXOC3	EXOC4	EXOC3	0.204889	0.0555034	-0.0250801	0.816581	COREAD_chr7	2	2	2	7	1	Non-promiscuous	Non-aggregation prone
EXOC4_EXOC5	EXOC4	EXOC5	0.198249	0.0640866	-0.0787446	0.465842	COREAD_chr7	2	4	2	7	0.5	Non-promiscuous	Non-aggregation prone
EXOC4_EXOC6	EXOC4	EXOC6	0.163362	0.128312	-0.0187212	0.862553	COREAD_chr7	2	4	2	7	0.5	Non-promiscuous	Non-aggregation prone
EXOC4_EXOC7	EXOC4	EXOC7	0.113152	0.293875	0.375151	0.000316523	COREAD_chr7	2	3	2	7	0.666667	Non-promiscuous	Non-aggregation prone
EXOC4_EXOC8	EXOC4	EXOC8	0.379575	0.000265001	-0.0368792	0.733008	COREAD_chr7	2	2	2	7	1	Non-promiscuous	Non-aggregation prone
FAF2_AMFR	FAF2	AMFR	0.553836	8.88236e-10	-0.117291	0.24038	BRCA_chr5	1	6	3	14	0.166667	Non-promiscuous	Non-aggregation prone
FAF2_AUP1	FAF2	AUP1	0.1853	0.058431	-0.109527	0.266037	BRCA_chr5	2	3	3	14	0.666667	Non-promiscuous	Non-aggregation prone
FAF2_BAG6	FAF2	BAG6	0.264545	0.00638949	0.0710968	0.471083	BRCA_chr5	1	5	3	14	0.2	Non-promiscuous	Non-aggregation prone
FAF2_BSG	FAF2	BSG	0.135331	0.168677	-0.0445781	0.651596	BRCA_chr5	1	5	3	14	0.2	Non-promiscuous	Non-aggregation prone
FAF2_ERLEC1	FAF2	ERLEC1	0.4966	7.13028e-08	0.131609	0.180806	BRCA_chr5	1	3	3	14	0.333333	Non-promiscuous	Non-aggregation prone
FAF2_ERLIN2	FAF2	ERLIN2	0.512212	2.33353e-08	-0.194744	0.0465087	BRCA_chr5	1	5	3	14	0.2	Non-promiscuous	Non-aggregation prone
FAF2_FAM8A1	FAF2	FAM8A1	0.512793	2.23616e-08	-0.0315049	0.781456	BRCA_chr5	1	3	3	14	0.333333	Non-promiscuous	Non-aggregation prone
FAF2_HSPA5	FAF2	HSPA5	0.178831	0.0679593	-0.0140058	0.887233	BRCA_chr5	1	10	3	14	0.1	Non-promiscuous	Non-aggregation prone
FAF2_OS9	FAF2	OS9	0.470019	4.22039e-07	0.137529	0.161802	BRCA_chr5	2	5	3	14	0.4	Non-promiscuous	Non-aggregation prone
FAF2_SEL1L	FAF2	SEL1L	0.47372	3.32431e-07	0.0592059	0.548543	BRCA_chr5	2	4	3	14	0.5	Non-promiscuous	Non-aggregation prone
FAF2_SYVN1	FAF2	SYVN1	0.348632	0.000267713	-0.0198529	0.843004	BRCA_chr5	1	5	3	14	0.2	Non-promiscuous	Non-aggregation prone
FAF2_UBE2J1	FAF2	UBE2J1	0.0253784	0.797195	-0.0824737	0.417041	BRCA_chr5	2	3	3	14	0.666667	Non-promiscuous	Non-aggregation prone
FASTKD5_DDX28	FASTKD5	DDX28	0.158025	0.141434	0.148967	0.165993	COREAD_chr20	1	1	1	4	1	Non-promiscuous	Non-aggregation prone
FASTKD5_DHX30	FASTKD5	DHX30	-0.0101617	0.925137	0.0586104	0.58753	COREAD_chr20	1	2	1	4	0.5	Non-promiscuous	Non-aggregation prone
FASTKD5_FASTKD2	FASTKD5	FASTKD2	0.367669	0.000425065	0.169692	0.113975	COREAD_chr20	1	1	1	4	1	Non-promiscuous	Non-aggregation prone
FASTKD5_GRSF1	FASTKD5	GRSF1	0.487338	1.47004e-06	0.0629847	0.559907	COREAD_chr20	1	1	1	4	1	Non-promiscuous	Non-aggregation prone
FIS1_DNM1L	FIS1	DNM1L	-0.214699	0.0190384	0.144068	0.118012	OV_chr7	1	3	1	1	0.333333	Non-promiscuous	Non-aggregation prone
FKBP1A_PPP3CA	FKBP1A	PPP3CA	0.0543797	0.556944	-0.0535536	0.56296	OV_chr20	1	5	1	2	0.2	Non-promiscuous	Non-aggregation prone
FKBP1A_PPP3R1	FKBP1A	PPP3R1	0.15193	0.0990543	0.0446809	0.667236	OV_chr20	1	2	1	2	0.5	Non-promiscuous	Non-aggregation prone
GCN1_BCAS2	GCN1	BCAS2	-0.0244267	0.792018	0.223622	0.0144964	OV_chr12	2	3	2	29	0.666667	Non-promiscuous	Non-aggregation prone
GCN1_BZW1	GCN1	BZW1	0.322112	0.000353663	0.115503	0.210976	OV_chr12	1	2	2	29	0.5	Non-promiscuous	Non-aggregation prone
GCN1_CDC5L	GCN1	CDC5L	0.468616	7.66497e-08	0.200221	0.0290171	OV_chr12	2	5	2	29	0.4	Non-promiscuous	Non-aggregation prone
GCN1_CWC15	GCN1	CWC15	-0.358546	6.22927e-05	0.0744125	0.421228	OV_chr12	1	4	2	29	0.25	Non-promiscuous	Non-aggregation prone
GCN1_DYNC1H1	GCN1	DYNC1H1	0.69253	0	-0.0346176	0.708583	OV_chr12	1	4	2	29	0.25	Non-promiscuous	Non-aggregation prone
GCN1_HSPA8	GCN1	HSPA8	0.362619	5.06113e-05	0.0613517	0.507441	OV_chr12	2	16	2	29	0.125	Non-promiscuous	Non-aggregation prone
GCN1_ILF2	GCN1	ILF2	0.207812	0.0233381	0.285743	0.00163196	OV_chr12	1	5	2	29	0.2	Non-promiscuous	Non-aggregation prone
GCN1_PLRG1	GCN1	PLRG1	0.165033	0.0728739	0.179504	0.0507735	OV_chr12	2	4	2	29	0.5	Non-promiscuous	Non-aggregation prone
GCN1_PPP1CA	GCN1	PPP1CA	-0.1381	0.134191	0.0533186	0.564677	OV_chr12	1	5	2	29	0.2	Non-promiscuous	Non-aggregation prone
GCN1_PRKDC	GCN1	PRKDC	0.667042	0	0.313951	0.00050707	OV_chr12	1	16	2	29	0.0625	Non-promiscuous	Non-aggregation prone
GCN1_PRPF19	GCN1	PRPF19	0.439923	5.55648e-07	0.161608	0.0791074	OV_chr12	2	4	2	29	0.5	Non-promiscuous	Non-aggregation prone
GCN1_RBMX	GCN1	RBMX	0.175936	0.0556279	0.129398	0.160747	OV_chr12	1	3	2	29	0.333333	Non-promiscuous	Non-aggregation prone
GCN1_SCAF8	GCN1	SCAF8	0.723088	0	0.225269	0.0146072	OV_chr12	1	2	2	29	0.5	Non-promiscuous	Non-aggregation prone
GCN1_SF3B1	GCN1	SF3B1	0.66633	0	0.262085	0.00398505	OV_chr12	1	9	2	29	0.111111	Non-promiscuous	Non-aggregation prone
GCN1_SF3B2	GCN1	SF3B2	0.615938	8.9484e-14	0.0981199	0.288405	OV_chr12	1	7	2	29	0.142857	Non-promiscuous	Non-aggregation prone
GCN1_SF3B4	GCN1	SF3B4	0.296311	0.00106767	0.0639866	0.489344	OV_chr12	1	6	2	29	0.166667	Non-promiscuous	Non-aggregation prone
GCN1_SFPQ	GCN1	SFPQ	0.631812	1.31006e-14	0.159172	0.0837947	OV_chr12	1	9	2	29	0.111111	Non-promiscuous	Non-aggregation prone
GCN1_SNRPA	GCN1	SNRPA	0.249494	0.00621254	0.0930209	0.314314	OV_chr12	1	6	2	29	0.166667	Non-promiscuous	Non-aggregation prone
GCN1_SNRPA1	GCN1	SNRPA1	0.0597137	0.518862	0.137958	0.134597	OV_chr12	1	6	2	29	0.166667	Non-promiscuous	Non-aggregation prone
GCN1_SNRPD1	GCN1	SNRPD1	-0.128315	0.164306	0.28105	0.00196027	OV_chr12	1	18	2	29	0.0555556	Non-promiscuous	Non-aggregation prone
GCN1_SNRPD2	GCN1	SNRPD2	-0.437359	6.57511e-07	0.192658	0.0358017	OV_chr12	1	14	2	29	0.0714286	Non-promiscuous	Non-aggregation prone
GCN1_SNRPD3	GCN1	SNRPD3	-0.00145991	0.987428	0.0854152	0.355682	OV_chr12	1	17	2	29	0.0588235	Non-promiscuous	Non-aggregation prone
GCN1_SRRM1	GCN1	SRRM1	0.585323	2.72715e-12	0.0514813	0.578187	OV_chr12	1	10	2	29	0.1	Non-promiscuous	Non-aggregation prone
GCN1_SRSF1	GCN1	SRSF1	0.584774	2.88991e-12	0.0663296	0.473545	OV_chr12	1	6	2	29	0.166667	Non-promiscuous	Non-aggregation prone
GCN1_SRSF2	GCN1	SRSF2	0.2713	0.00284057	-0.0460761	0.618773	OV_chr12	1	3	2	29	0.333333	Non-promiscuous	Non-aggregation prone
GCN1_TOP2A	GCN1	TOP2A	0.419691	2.02176e-06	0.191233	0.0372185	OV_chr12	1	7	2	29	0.142857	Non-promiscuous	Non-aggregation prone
GEMIN5_DDX20	GEMIN5	DDX20	0.491551	1.01125e-07	0.554209	8.60809e-10	BRCA_chr5	6	12	7	18	0.5	Promiscuous	Non-aggregation prone
GEMIN5_GEMIN2	GEMIN5	GEMIN2	0.391924	3.55532e-05	0.136492	0.165018	BRCA_chr5	6	13	7	18	0.461538	Promiscuous	Non-aggregation prone
GEMIN5_GEMIN4	GEMIN5	GEMIN4	0.503297	4.44624e-08	0.454074	1.14349e-06	BRCA_chr5	6	13	7	18	0.461538	Promiscuous	Non-aggregation prone
GEMIN5_GEMIN6	GEMIN5	GEMIN6	0.266183	0.00605822	0.438462	2.89338e-06	BRCA_chr5	4	8	7	18	0.5	Promiscuous	Non-aggregation prone
GEMIN5_GEMIN7	GEMIN5	GEMIN7	0.196475	0.0445587	0.10139	0.310588	BRCA_chr5	4	8	7	18	0.5	Promiscuous	Non-aggregation prone
GEMIN5_GEMIN8	GEMIN5	GEMIN8	0.276944	0.00423609	0.259252	0.00850847	BRCA_chr5	1	7	7	18	0.142857	Promiscuous	Non-aggregation prone
GEMIN5_SNRPA	GEMIN5	SNRPA	-0.137736	0.161165	0.0787995	0.424272	BRCA_chr5	2	10	7	18	0.2	Promiscuous	Non-aggregation prone
GEMIN5_SNRPD1	GEMIN5	SNRPD1	-0.0294734	0.765351	-0.0214493	0.828065	BRCA_chr5	2	22	7	18	0.0909091	Promiscuous	Non-aggregation prone
GEMIN5_SNRPD2	GEMIN5	SNRPD2	-0.0804686	0.414493	0.149254	0.128609	BRCA_chr5	2	18	7	18	0.111111	Promiscuous	Non-aggregation prone
GEMIN5_SNRPD3	GEMIN5	SNRPD3	0.0100456	0.918989	0.0410948	0.677241	BRCA_chr5	2	21	7	18	0.0952381	Promiscuous	Non-aggregation prone
GEMIN5_SNRPE	GEMIN5	SNRPE	0.297626	0.00204619	-0.0379536	0.700688	BRCA_chr5	2	17	7	18	0.117647	Promiscuous	Non-aggregation prone
GEMIN5_SNRPF	GEMIN5	SNRPF	0.0614659	0.533358	0.11187	0.255882	BRCA_chr5	2	16	7	18	0.125	Promiscuous	Non-aggregation prone
GEMIN5_SNRPG	GEMIN5	SNRPG	-0.220288	0.0239409	-0.0316401	0.748655	BRCA_chr5	2	16	7	18	0.125	Promiscuous	Non-aggregation prone
GEMIN5_SNRPN	GEMIN5	SNRPN	0.272476	0.0049229	0.0928468	0.34617	BRCA_chr5	1	8	7	18	0.125	Promiscuous	Non-aggregation prone
GEMIN5_STRAP	GEMIN5	STRAP	0.307951	0.00139429	0.0426705	0.665592	BRCA_chr5	2	8	7	18	0.25	Promiscuous	Non-aggregation prone
GET4_BAG6	GET4	BAG6	0.297735	0.00484352	0.145092	0.17741	COREAD_chr7	1	3	1	2	0.333333	Non-promiscuous	Non-aggregation prone
GET4_UBL4A	GET4	UBL4A	0.529111	1.15972e-07	0.213074	0.0462416	COREAD_chr7	1	1	1	2	1	Non-promiscuous	Non-aggregation prone
GRPEL2_GRPEL1	GRPEL2	GRPEL1	0.302913	0.00168419	0.287529	0.00293856	BRCA_chr5	3	5	4	3	0.6	Non-promiscuous	Non-aggregation prone
GRPEL2_TIMM44	GRPEL2	TIMM44	0.0376114	0.70326	0.293365	0.00238758	BRCA_chr5	1	5	4	3	0.2	Non-promiscuous	Non-aggregation prone
GTF2F2_CTDP1	GTF2F2	CTDP1	-0.412965	6.37252e-05	-0.0393513	0.71585	COREAD_chr13	1	6	4	27	0.166667	Non-promiscuous	Non-aggregation prone
GTF2F2_ERCC2	GTF2F2	ERCC2	-0.172766	0.107475	0.0290152	0.788429	COREAD_chr13	2	12	4	27	0.166667	Non-promiscuous	Non-aggregation prone
GTF2F2_ERCC3	GTF2F2	ERCC3	0.111497	0.30104	0.11491	0.28639	COREAD_chr13	2	12	4	27	0.166667	Non-promiscuous	Non-aggregation prone
GTF2F2_GTF2B	GTF2F2	GTF2B	0.230918	0.03042	-0.0395029	0.714803	COREAD_chr13	3	8	4	27	0.375	Non-promiscuous	Non-aggregation prone
GTF2F2_GTF2E1	GTF2F2	GTF2E1	0.544627	4.12596e-08	0.126479	0.240302	COREAD_chr13	2	6	4	27	0.333333	Non-promiscuous	Non-aggregation prone
GTF2F2_GTF2F1	GTF2F2	GTF2F1	-0.200697	0.0608045	0.273984	0.00979237	COREAD_chr13	4	11	4	27	0.363636	Non-promiscuous	Non-aggregation prone
GTF2F2_POLR2A	GTF2F2	POLR2A	-0.459617	6.64727e-06	-0.01026	0.924415	COREAD_chr13	3	27	4	27	0.111111	Non-promiscuous	Non-aggregation prone
GTF2F2_POLR2B	GTF2F2	POLR2B	0.212532	0.0468122	0.116782	0.278561	COREAD_chr13	3	11	4	27	0.272727	Non-promiscuous	Non-aggregation prone
GTF2F2_POLR2C	GTF2F2	POLR2C	0.198566	0.0636536	-0.0338167	0.754446	COREAD_chr13	3	7	4	27	0.428571	Non-promiscuous	Non-aggregation prone
GTF2F2_POLR2E	GTF2F2	POLR2E	-0.320207	0.00235508	0.0558933	0.604993	COREAD_chr13	3	7	4	27	0.428571	Non-promiscuous	Non-aggregation prone
GTF2F2_POLR2H	GTF2F2	POLR2H	-0.0548765	0.611587	0.00978833	0.92788	COREAD_chr13	3	7	4	27	0.428571	Non-promiscuous	Non-aggregation prone
GTF2I_CHD4	GTF2I	CHD4	0.394703	0.000141564	0.468158	4.23446e-06	COREAD_chr7	1	17	4	33	0.0588235	Non-promiscuous	Aggregation prone
GTF2I_CHUK	GTF2I	CHUK	0.450407	1.06668e-05	-0.0665806	0.537673	COREAD_chr7	1	25	4	33	0.04	Non-promiscuous	Aggregation prone
GTF2I_DDX3X	GTF2I	DDX3X	0.539467	5.85205e-08	0.160932	0.134166	COREAD_chr7	1	6	4	33	0.166667	Non-promiscuous	Aggregation prone
GTF2I_GLG1	GTF2I	GLG1	0.221531	0.038053	0.046459	0.667323	COREAD_chr7	1	4	4	33	0.25	Non-promiscuous	Aggregation prone
GTF2I_HDAC1	GTF2I	HDAC1	0.103448	0.337492	0.218344	0.0409844	COREAD_chr7	3	77	4	33	0.038961	Non-promiscuous	Aggregation prone
GTF2I_HDAC2	GTF2I	HDAC2	0.509915	3.88577e-07	0.34002	0.00119022	COREAD_chr7	3	60	4	33	0.05	Non-promiscuous	Aggregation prone
GTF2I_IKBKG	GTF2I	IKBKG	-0.0570251	0.597691	-0.0353118	0.743956	COREAD_chr7	1	23	4	33	0.0434783	Non-promiscuous	Aggregation prone
GTF2I_KDM1A	GTF2I	KDM1A	0.342926	0.00107279	0.254556	0.0166941	COREAD_chr7	3	18	4	33	0.166667	Non-promiscuous	Aggregation prone
GTF2I_MTA1	GTF2I	MTA1	0.28273	0.00760742	0.164782	0.124981	COREAD_chr7	1	10	4	33	0.1	Non-promiscuous	Aggregation prone
GTF2I_MTA2	GTF2I	MTA2	0.0772252	0.474518	0.416138	5.52101e-05	COREAD_chr7	1	18	4	33	0.0555556	Non-promiscuous	Aggregation prone
GTF2I_NFKB1	GTF2I	NFKB1	0.231182	0.0302254	-0.135262	0.20893	COREAD_chr7	1	16	4	33	0.0625	Non-promiscuous	Aggregation prone
GTF2I_NFKB2	GTF2I	NFKB2	-0.124793	0.246677	-0.155269	0.148597	COREAD_chr7	1	11	4	33	0.0909091	Non-promiscuous	Aggregation prone
GTF2I_NFKBIB	GTF2I	NFKBIB	0.0668169	0.536227	0.00260635	0.980773	COREAD_chr7	1	9	4	33	0.111111	Non-promiscuous	Aggregation prone
GTF2I_RBBP4	GTF2I	RBBP4	0.260259	0.0143296	0.155404	0.14824	COREAD_chr7	1	50	4	33	0.02	Non-promiscuous	Aggregation prone
GTF2I_RBBP7	GTF2I	RBBP7	0.21896	0.0404032	0.180537	0.0923308	COREAD_chr7	1	37	4	33	0.027027	Non-promiscuous	Aggregation prone
GTF2I_RCOR1	GTF2I	RCOR1	0.455426	8.25748e-06	0.120477	0.263528	COREAD_chr7	2	18	4	33	0.111111	Non-promiscuous	Aggregation prone
GTF2I_RELA	GTF2I	RELA	0.208429	0.0513267	-0.0173928	0.872221	COREAD_chr7	1	25	4	33	0.04	Non-promiscuous	Aggregation prone
GTF2I_RPL30	GTF2I	RPL30	0.0728928	0.499729	0.174605	0.103728	COREAD_chr7	1	9	4	33	0.111111	Non-promiscuous	Aggregation prone
GTF2I_RPL6	GTF2I	RPL6	0.363249	0.000504278	0.199489	0.0624068	COREAD_chr7	1	8	4	33	0.125	Non-promiscuous	Aggregation prone
GTF2I_RPS13	GTF2I	RPS13	0.114209	0.289361	0.207297	0.0526326	COREAD_chr7	1	9	4	33	0.111111	Non-promiscuous	Aggregation prone
GTF2I_SIN3A	GTF2I	SIN3A	0.456905	7.65139e-06	0.215285	0.043971	COREAD_chr7	1	43	4	33	0.0232558	Non-promiscuous	Aggregation prone
H2AFY_CUL3	H2AFY	CUL3	0.358916	0.000170018	0.0916649	0.35237	BRCA_chr5	1	21	1	2	0.047619	Non-promiscuous	Non-aggregation prone
H2AFY_SPOP	H2AFY	SPOP	0.496942	6.96201e-08	0.251001	0.0671392	BRCA_chr5	1	3	1	2	0.333333	Non-promiscuous	Non-aggregation prone
HINT1_CDC34	HINT1	CDC34	0.0285196	0.772735	-0.444696	2.83334e-06	BRCA_chr5	1	4	3	4	0.25	Non-promiscuous	Non-aggregation prone
HINT1_KAT5	HINT1	KAT5	0.250974	0.00981128	-0.244557	0.0119279	BRCA_chr5	1	11	3	4	0.0909091	Non-promiscuous	Non-aggregation prone
HINT1_RBX1	HINT1	RBX1	0.0917375	0.351987	0.509766	2.79026e-08	BRCA_chr5	1	51	3	4	0.0196078	Non-promiscuous	Non-aggregation prone
HINT1_SP1	HINT1	SP1	0.255059	0.00864269	-0.323025	0.000776675	BRCA_chr5	1	8	3	4	0.125	Non-promiscuous	Non-aggregation prone
HMGB1_CSNK2A1	HMGB1	CSNK2A1	0.461044	6.17018e-06	0.113459	0.292561	COREAD_chr13	1	6	2	7	0.166667	Non-promiscuous	Non-aggregation prone
HMGB1_CSNK2A2	HMGB1	CSNK2A2	0.514917	2.85595e-07	-0.054132	0.616434	COREAD_chr13	1	6	2	7	0.166667	Non-promiscuous	Non-aggregation prone
HMGB1_CSNK2B	HMGB1	CSNK2B	0.403543	9.67499e-05	0.197006	0.0658079	COREAD_chr13	1	7	2	7	0.142857	Non-promiscuous	Non-aggregation prone
HMGB1_GAPDH	HMGB1	GAPDH	-0.261333	0.0139182	0.0523662	0.627998	COREAD_chr13	1	4	2	7	0.25	Non-promiscuous	Non-aggregation prone
HMGB1_HMGB2	HMGB1	HMGB2	0.467366	4.41754e-06	0.555537	1.93217e-08	COREAD_chr13	1	2	2	7	0.5	Non-promiscuous	Non-aggregation prone
HMGB1_HSPA8	HMGB1	HSPA8	0.268941	0.0112871	0.0832508	0.440627	COREAD_chr13	1	17	2	7	0.0588235	Non-promiscuous	Non-aggregation prone
HMGB1_PDIA3	HMGB1	PDIA3	0.397679	0.000124687	0.164528	0.125572	COREAD_chr13	1	2	2	7	0.5	Non-promiscuous	Non-aggregation prone
HNF4A_SUB1	HNF4A	SUB1	-0.168962	0.115562	0.0236106	0.827156	COREAD_chr20	1	2	1	1	0.5	Non-promiscuous	Non-aggregation prone
HNRNPA2B1_ALYREF	HNRNPA2B1	ALYREF	0.0886555	0.33766	0.432944	8.75805e-07	OV_chr7	1	7	2	81	0.142857	Non-promiscuous	Non-aggregation prone
HNRNPA2B1_AQR	HNRNPA2B1	AQR	0.364079	4.69491e-05	0.180017	0.0501055	OV_chr7	1	3	2	81	0.333333	Non-promiscuous	Non-aggregation prone
HNRNPA2B1_CACTIN	HNRNPA2B1	CACTIN	0.516771	1.7819e-09	0.26503	0.0289477	OV_chr7	1	3	2	81	0.333333	Non-promiscuous	Non-aggregation prone
HNRNPA2B1_CDC40	HNRNPA2B1	CDC40	0.264407	0.00366325	0.236466	0.0106007	OV_chr7	1	3	2	81	0.333333	Non-promiscuous	Non-aggregation prone
HNRNPA2B1_CDC5L	HNRNPA2B1	CDC5L	0.500669	6.69026e-09	0.465952	9.2838e-08	OV_chr7	1	6	2	81	0.166667	Non-promiscuous	Non-aggregation prone
HNRNPA2B1_CWC15	HNRNPA2B1	CWC15	-0.0866116	0.348959	0.389966	1.1653e-05	OV_chr7	1	4	2	81	0.25	Non-promiscuous	Non-aggregation prone
HNRNPA2B1_CWC22	HNRNPA2B1	CWC22	0.4332	8.61442e-07	0.144674	0.129783	OV_chr7	1	3	2	81	0.333333	Non-promiscuous	Non-aggregation prone
HNRNPA2B1_CWC27	HNRNPA2B1	CWC27	0.268359	0.00316869	0.220424	0.0160019	OV_chr7	1	2	2	81	0.5	Non-promiscuous	Non-aggregation prone
HNRNPA2B1_DDX23	HNRNPA2B1	DDX23	0.483727	2.50455e-08	0.338926	0.000162954	OV_chr7	1	4	2	81	0.25	Non-promiscuous	Non-aggregation prone
HNRNPA2B1_DDX41	HNRNPA2B1	DDX41	0.180038	0.0500779	0.0701522	0.472743	OV_chr7	1	3	2	81	0.333333	Non-promiscuous	Non-aggregation prone
HNRNPA2B1_DDX5	HNRNPA2B1	DDX5	0.363517	4.833e-05	0.342473	0.000137593	OV_chr7	1	7	2	81	0.142857	Non-promiscuous	Non-aggregation prone
HNRNPA2B1_DHX38	HNRNPA2B1	DHX38	0.491639	1.36419e-08	0.324405	0.000319025	OV_chr7	1	4	2	81	0.25	Non-promiscuous	Non-aggregation prone
HNRNPA2B1_DHX8	HNRNPA2B1	DHX8	0.389937	1.16717e-05	0.140243	0.140254	OV_chr7	1	3	2	81	0.333333	Non-promiscuous	Non-aggregation prone
HNRNPA2B1_EFTUD2	HNRNPA2B1	EFTUD2	0.392601	1.00443e-05	0.437317	6.5935e-07	OV_chr7	1	5	2	81	0.2	Non-promiscuous	Non-aggregation prone
HNRNPA2B1_EIF4A3	HNRNPA2B1	EIF4A3	0.107214	0.245816	0.395172	8.67835e-06	OV_chr7	1	12	2	81	0.0833333	Non-promiscuous	Non-aggregation prone
HNRNPA2B1_FRG1	HNRNPA2B1	FRG1	-0.163531	0.0755577	0.20757	0.0235033	OV_chr7	1	2	2	81	0.5	Non-promiscuous	Non-aggregation prone
HNRNPA2B1_GPATCH1	HNRNPA2B1	GPATCH1	0.456381	1.82388e-07	0.403321	0.000142362	OV_chr7	1	2	2	81	0.5	Non-promiscuous	Non-aggregation prone
HNRNPA2B1_HNRNPA1	HNRNPA2B1	HNRNPA1	0.491547	1.37405e-08	0.472511	5.7746e-08	OV_chr7	1	3	2	81	0.333333	Non-promiscuous	Non-aggregation prone
HNRNPA2B1_HNRNPA3	HNRNPA2B1	HNRNPA3	0.53288	4.41893e-10	0.322169	0.000352762	OV_chr7	1	2	2	81	0.5	Non-promiscuous	Non-aggregation prone
HNRNPA2B1_HNRNPC	HNRNPA2B1	HNRNPC	0.156595	0.0889951	0.600847	5.04707e-13	OV_chr7	1	4	2	81	0.25	Non-promiscuous	Non-aggregation prone
HNRNPA2B1_HNRNPF	HNRNPA2B1	HNRNPF	0.25663	0.00484296	0.419684	2.02265e-06	OV_chr7	1	4	2	81	0.25	Non-promiscuous	Non-aggregation prone
HNRNPA2B1_HNRNPH1	HNRNPA2B1	HNRNPH1	0.616244	8.63754e-14	0.586241	2.47424e-12	OV_chr7	1	7	2	81	0.142857	Non-promiscuous	Non-aggregation prone
HNRNPA2B1_HNRNPK	HNRNPA2B1	HNRNPK	0.618594	6.52811e-14	0.690493	0	OV_chr7	1	4	2	81	0.25	Non-promiscuous	Non-aggregation prone
HNRNPA2B1_HNRNPM	HNRNPA2B1	HNRNPM	0.730031	0	0.608083	2.22711e-13	OV_chr7	1	4	2	81	0.25	Non-promiscuous	Non-aggregation prone
HNRNPA2B1_HNRNPR	HNRNPA2B1	HNRNPR	0.675082	0	0.554216	6.20242e-11	OV_chr7	1	4	2	81	0.25	Non-promiscuous	Non-aggregation prone
HNRNPA2B1_HNRNPU	HNRNPA2B1	HNRNPU	0.718366	0	0.691661	0	OV_chr7	1	11	2	81	0.0909091	Non-promiscuous	Non-aggregation prone
HNRNPA2B1_ISY1	HNRNPA2B1	ISY1	0.371372	3.20855e-05	0.308887	0.00108312	OV_chr7	1	3	2	81	0.333333	Non-promiscuous	Non-aggregation prone
HNRNPA2B1_LSM2	HNRNPA2B1	LSM2	-0.123309	0.181535	0.328094	0.000269816	OV_chr7	1	6	2	81	0.166667	Non-promiscuous	Non-aggregation prone
HNRNPA2B1_LSM3	HNRNPA2B1	LSM3	-0.196995	0.0317643	0.385433	1.63217e-05	OV_chr7	1	5	2	81	0.2	Non-promiscuous	Non-aggregation prone
HNRNPA2B1_MAGOH	HNRNPA2B1	MAGOH	0.086106	0.351791	0.379454	2.08151e-05	OV_chr7	1	13	2	81	0.0769231	Non-promiscuous	Non-aggregation prone
HNRNPA2B1_PABPC1	HNRNPA2B1	PABPC1	-0.0420168	0.650036	0.266486	0.00339503	OV_chr7	1	7	2	81	0.142857	Non-promiscuous	Non-aggregation prone
HNRNPA2B1_PDCD6	HNRNPA2B1	PDCD6	-0.19384	0.0346606	0.103091	0.264554	OV_chr7	1	4	2	81	0.25	Non-promiscuous	Non-aggregation prone
HNRNPA2B1_PLRG1	HNRNPA2B1	PLRG1	0.041326	0.65542	0.301723	0.000853782	OV_chr7	1	5	2	81	0.2	Non-promiscuous	Non-aggregation prone
HNRNPA2B1_PNN	HNRNPA2B1	PNN	0.581776	3.95994e-12	0.625709	2.77556e-14	OV_chr7	1	2	2	81	0.5	Non-promiscuous	Non-aggregation prone
HNRNPA2B1_PPIE	HNRNPA2B1	PPIE	0.108681	0.239377	0.0601837	0.515571	OV_chr7	1	3	2	81	0.333333	Non-promiscuous	Non-aggregation prone
HNRNPA2B1_PPIL1	HNRNPA2B1	PPIL1	0.0731164	0.429385	0.248127	0.00651118	OV_chr7	1	3	2	81	0.333333	Non-promiscuous	Non-aggregation prone
HNRNPA2B1_PPIL3	HNRNPA2B1	PPIL3	-0.0726748	0.432184	0.0131819	0.886854	OV_chr7	1	3	2	81	0.333333	Non-promiscuous	Non-aggregation prone
HNRNPA2B1_PPWD1	HNRNPA2B1	PPWD1	0.43627	7.05978e-07	0.0952741	0.315474	OV_chr7	1	3	2	81	0.333333	Non-promiscuous	Non-aggregation prone
HNRNPA2B1_PRPF19	HNRNPA2B1	PRPF19	0.417626	2.29598e-06	0.469791	7.04e-08	OV_chr7	1	5	2	81	0.2	Non-promiscuous	Non-aggregation prone
HNRNPA2B1_PRPF4B	HNRNPA2B1	PRPF4B	0.480409	3.21683e-08	0.309407	0.000616994	OV_chr7	1	3	2	81	0.333333	Non-promiscuous	Non-aggregation prone
HNRNPA2B1_PRPF8	HNRNPA2B1	PRPF8	0.468509	7.72435e-08	0.442166	4.79006e-07	OV_chr7	1	7	2	81	0.142857	Non-promiscuous	Non-aggregation prone
HNRNPA2B1_PTGES3	HNRNPA2B1	PTGES3	0.105298	0.254404	0.253468	0.00541252	OV_chr7	1	3	2	81	0.333333	Non-promiscuous	Non-aggregation prone
HNRNPA2B1_RBM22	HNRNPA2B1	RBM22	0.20141	0.0280566	0.353518	8.01834e-05	OV_chr7	1	3	2	81	0.333333	Non-promiscuous	Non-aggregation prone
HNRNPA2B1_RBM8A	HNRNPA2B1	RBM8A	0.382004	1.8116e-05	0.399309	6.84147e-06	OV_chr7	1	16	2	81	0.0625	Non-promiscuous	Non-aggregation prone
HNRNPA2B1_RBMX	HNRNPA2B1	RBMX	0.367063	4.02219e-05	0.650912	1.11022e-15	OV_chr7	1	3	2	81	0.333333	Non-promiscuous	Non-aggregation prone
HNRNPA2B1_SART1	HNRNPA2B1	SART1	0.457542	1.6823e-07	0.403034	5.50785e-06	OV_chr7	1	3	2	81	0.333333	Non-promiscuous	Non-aggregation prone
HNRNPA2B1_SF3A1	HNRNPA2B1	SF3A1	0.397906	7.41867e-06	0.614036	1.1191e-13	OV_chr7	1	6	2	81	0.166667	Non-promiscuous	Non-aggregation prone
HNRNPA2B1_SF3A2	HNRNPA2B1	SF3A2	0.372048	3.09578e-05	0.459116	1.50701e-07	OV_chr7	1	5	2	81	0.2	Non-promiscuous	Non-aggregation prone
HNRNPA2B1_SF3A3	HNRNPA2B1	SF3A3	0.4596	1.45668e-07	0.539496	2.43926e-10	OV_chr7	1	5	2	81	0.2	Non-promiscuous	Non-aggregation prone
HNRNPA2B1_SF3B1	HNRNPA2B1	SF3B1	0.587203	2.23377e-12	0.530067	5.66713e-10	OV_chr7	1	9	2	81	0.111111	Non-promiscuous	Non-aggregation prone
HNRNPA2B1_SF3B2	HNRNPA2B1	SF3B2	0.522361	1.10741e-09	0.603554	3.72591e-13	OV_chr7	1	7	2	81	0.142857	Non-promiscuous	Non-aggregation prone
HNRNPA2B1_SF3B3	HNRNPA2B1	SF3B3	0.467718	8.17758e-08	0.495421	1.01481e-08	OV_chr7	1	15	2	81	0.0666667	Non-promiscuous	Non-aggregation prone
HNRNPA2B1_SLU7	HNRNPA2B1	SLU7	0.119641	0.19497	0.266897	0.00970551	OV_chr7	1	3	2	81	0.333333	Non-promiscuous	Non-aggregation prone
HNRNPA2B1_SNRNP200	HNRNPA2B1	SNRNP200	0.539795	2.37387e-10	0.45955	1.46179e-07	OV_chr7	1	4	2	81	0.25	Non-promiscuous	Non-aggregation prone
HNRNPA2B1_SNRNP40	HNRNPA2B1	SNRNP40	0.323095	0.000338414	0.40371	5.29365e-06	OV_chr7	1	4	2	81	0.25	Non-promiscuous	Non-aggregation prone
HNRNPA2B1_SNRPA1	HNRNPA2B1	SNRPA1	0.272896	0.00267572	0.505875	4.39475e-09	OV_chr7	1	6	2	81	0.166667	Non-promiscuous	Non-aggregation prone
HNRNPA2B1_SNRPB	HNRNPA2B1	SNRPB	0.0729882	0.430196	0.444011	4.23638e-07	OV_chr7	1	18	2	81	0.0555556	Non-promiscuous	Non-aggregation prone
HNRNPA2B1_SNRPB2	HNRNPA2B1	SNRPB2	-0.0186441	0.8405	0.602129	4.37206e-13	OV_chr7	1	5	2	81	0.2	Non-promiscuous	Non-aggregation prone
HNRNPA2B1_SNRPD1	HNRNPA2B1	SNRPD1	0.0667925	0.470457	0.414414	2.79351e-06	OV_chr7	1	18	2	81	0.0555556	Non-promiscuous	Non-aggregation prone
HNRNPA2B1_SNRPD2	HNRNPA2B1	SNRPD2	-0.243462	0.00762815	0.590771	1.52411e-12	OV_chr7	1	14	2	81	0.0714286	Non-promiscuous	Non-aggregation prone
HNRNPA2B1_SNRPD3	HNRNPA2B1	SNRPD3	0.0135024	0.884123	0.531057	5.19344e-10	OV_chr7	1	17	2	81	0.0588235	Non-promiscuous	Non-aggregation prone
HNRNPA2B1_SNRPE	HNRNPA2B1	SNRPE	-0.0700897	0.44878	0.102841	0.271964	OV_chr7	1	13	2	81	0.0769231	Non-promiscuous	Non-aggregation prone
HNRNPA2B1_SNRPF	HNRNPA2B1	SNRPF	0.179519	0.0507548	0.359159	7.51653e-05	OV_chr7	1	12	2	81	0.0833333	Non-promiscuous	Non-aggregation prone
HNRNPA2B1_SNRPG	HNRNPA2B1	SNRPG	-0.0434981	0.638554	0.518485	2.12567e-09	OV_chr7	1	12	2	81	0.0833333	Non-promiscuous	Non-aggregation prone
HNRNPA2B1_SNW1	HNRNPA2B1	SNW1	0.460241	1.39253e-07	0.644111	2.66454e-15	OV_chr7	1	5	2	81	0.2	Non-promiscuous	Non-aggregation prone
HNRNPA2B1_SRRM1	HNRNPA2B1	SRRM1	0.538292	2.72032e-10	0.32479	0.000313533	OV_chr7	1	10	2	81	0.1	Non-promiscuous	Non-aggregation prone
HNRNPA2B1_SRRM2	HNRNPA2B1	SRRM2	0.421265	1.83394e-06	0.343128	0.00013333	OV_chr7	1	5	2	81	0.2	Non-promiscuous	Non-aggregation prone
HNRNPA2B1_SRSF1	HNRNPA2B1	SRSF1	0.673707	0	0.71962	0	OV_chr7	1	6	2	81	0.166667	Non-promiscuous	Non-aggregation prone
HNRNPA2B1_SYF2	HNRNPA2B1	SYF2	0.257997	0.0046137	0.30839	0.00346461	OV_chr7	1	3	2	81	0.333333	Non-promiscuous	Non-aggregation prone
HNRNPA2B1_SYNCRIP	HNRNPA2B1	SYNCRIP	0.47573	4.55757e-08	0.197629	0.0312078	OV_chr7	1	5	2	81	0.2	Non-promiscuous	Non-aggregation prone
HNRNPA2B1_TFIP11	HNRNPA2B1	TFIP11	0.329013	0.000258705	0.101309	0.287846	OV_chr7	1	6	2	81	0.166667	Non-promiscuous	Non-aggregation prone
HNRNPA2B1_U2AF1	HNRNPA2B1	U2AF1	0.313018	0.000528049	0.566942	1.79692e-11	OV_chr7	1	6	2	81	0.166667	Non-promiscuous	Non-aggregation prone
HNRNPA2B1_WDR83	HNRNPA2B1	WDR83	0.327817	0.000273261	0.381309	0.0048464	OV_chr7	1	2	2	81	0.5	Non-promiscuous	Non-aggregation prone
HNRNPA2B1_XAB2	HNRNPA2B1	XAB2	0.368808	3.67183e-05	0.201752	0.0277856	OV_chr7	1	3	2	81	0.333333	Non-promiscuous	Non-aggregation prone
HNRNPA2B1_ZCCHC8	HNRNPA2B1	ZCCHC8	0.56749	1.70148e-11	0.288715	0.00211853	OV_chr7	1	3	2	81	0.333333	Non-promiscuous	Non-aggregation prone
HOOK3_HOOK1	HOOK3	HOOK1	0.57284	5.47822e-09	-0.123431	0.251914	COREAD_chr8	1	8	3	6	0.125	Non-promiscuous	Non-aggregation prone
HOOK3_HOOK2	HOOK3	HOOK2	-0.296467	0.00503648	0.140455	0.191816	COREAD_chr8	1	8	3	6	0.125	Non-promiscuous	Non-aggregation prone
HOOK3_VPS16	HOOK3	VPS16	-0.188475	0.0786503	-0.0240896	0.823705	COREAD_chr8	1	10	3	6	0.1	Non-promiscuous	Non-aggregation prone
HOOK3_VPS41	HOOK3	VPS41	0.684301	1.98508e-13	0.100759	0.350269	COREAD_chr8	1	7	3	6	0.142857	Non-promiscuous	Non-aggregation prone
HSP90B1_AUP1	HSP90B1	AUP1	0.142152	0.123032	0.0123415	0.894024	OV_chr12	1	2	1	12	0.5	Non-promiscuous	Non-aggregation prone
HSP90B1_BSG	HSP90B1	BSG	0.415418	2.62793e-06	0.0971016	0.293462	OV_chr12	1	3	1	12	0.333333	Non-promiscuous	Non-aggregation prone
HSP90B1_DERL2	HSP90B1	DERL2	0.369477	3.54516e-05	0.162944	0.174554	OV_chr12	1	5	1	12	0.2	Non-promiscuous	Non-aggregation prone
HSP90B1_ERLEC1	HSP90B1	ERLEC1	0.388926	1.23523e-05	0.149836	0.103851	OV_chr12	1	1	1	12	1	Non-promiscuous	Non-aggregation prone
HSP90B1_ERLIN2	HSP90B1	ERLIN2	0.228514	0.0124315	0.067761	0.464031	OV_chr12	1	3	1	12	0.333333	Non-promiscuous	Non-aggregation prone
HSP90B1_FAF2	HSP90B1	FAF2	0.296553	0.00105715	0.0268195	0.772175	OV_chr12	1	3	1	12	0.333333	Non-promiscuous	Non-aggregation prone
HSP90B1_FAM8A1	HSP90B1	FAM8A1	0.233542	0.0105821	0.22174	0.0973747	OV_chr12	1	1	1	12	1	Non-promiscuous	Non-aggregation prone
HSP90B1_HSPA5	HSP90B1	HSPA5	0.357271	6.64371e-05	0.317761	0.000429108	OV_chr12	1	8	1	12	0.125	Non-promiscuous	Non-aggregation prone
HSP90B1_SEL1L	HSP90B1	SEL1L	0.377973	2.25524e-05	0.230245	0.0117653	OV_chr12	1	3	1	12	0.333333	Non-promiscuous	Non-aggregation prone
HSP90B1_SYVN1	HSP90B1	SYVN1	0.383435	1.67486e-05	0.177384	0.0613363	OV_chr12	1	3	1	12	0.333333	Non-promiscuous	Non-aggregation prone
HSP90B1_UBE2J1	HSP90B1	UBE2J1	0.162178	0.078042	0.279201	0.0546332	OV_chr12	1	2	1	12	0.5	Non-promiscuous	Non-aggregation prone
HSPA4_ACTB	HSPA4	ACTB	-0.140919	0.151611	0.0731599	0.458277	BRCA_chr5	1	28	6	66	0.0357143	Promiscuous	Non-aggregation prone
HSPA4_ASH2L	HSPA4	ASH2L	0.317966	0.000948403	0.000974497	0.992128	BRCA_chr5	2	27	6	66	0.0740741	Promiscuous	Non-aggregation prone
HSPA4_BAG5	HSPA4	BAG5	0.304375	0.00159491	0.137549	0.161738	BRCA_chr5	1	6	6	66	0.166667	Promiscuous	Non-aggregation prone
HSPA4_CDC37	HSPA4	CDC37	0.00270578	0.978145	0.033869	0.7316	BRCA_chr5	1	17	6	66	0.0588235	Promiscuous	Non-aggregation prone
HSPA4_CHD8	HSPA4	CHD8	0.42174	7.44077e-06	0.101317	0.303758	BRCA_chr5	1	6	6	66	0.166667	Promiscuous	Non-aggregation prone
HSPA4_E2F6	HSPA4	E2F6	0.261767	0.00698822	-0.015873	0.937366	BRCA_chr5	1	7	6	66	0.142857	Promiscuous	Non-aggregation prone
HSPA4_HCFC1	HSPA4	HCFC1	0.287394	0.00295253	0.00206303	0.983336	BRCA_chr5	2	16	6	66	0.125	Promiscuous	Non-aggregation prone
HSPA4_HDAC1	HSPA4	HDAC1	0.0953971	0.333026	0.143883	0.143099	BRCA_chr5	1	81	6	66	0.0123457	Promiscuous	Non-aggregation prone
HSPA4_HDAC2	HSPA4	HDAC2	0.0790587	0.422745	0.0155401	0.874975	BRCA_chr5	1	64	6	66	0.015625	Promiscuous	Non-aggregation prone
HSPA4_HSP90AA1	HSPA4	HSP90AA1	0.403981	1.92302e-05	0.294298	0.00230871	BRCA_chr5	2	22	6	66	0.0909091	Promiscuous	Non-aggregation prone
HSPA4_HSP90AB1	HSPA4	HSP90AB1	0.286253	0.00307318	0.11017	0.263224	BRCA_chr5	1	20	6	66	0.05	Promiscuous	Non-aggregation prone
HSPA4_HSPA1A	HSPA4	HSPA1A	0.31666	0.000998045	0.513581	2.11021e-08	BRCA_chr5	1	13	6	66	0.0769231	Promiscuous	Non-aggregation prone
HSPA4_HSPA5	HSPA4	HSPA5	0.246299	0.0113172	-0.0741862	0.451979	BRCA_chr5	1	13	6	66	0.0769231	Promiscuous	Non-aggregation prone
HSPA4_HSPA8	HSPA4	HSPA8	0.462928	6.61569e-07	0.40904	1.47531e-05	BRCA_chr5	1	21	6	66	0.047619	Promiscuous	Non-aggregation prone
HSPA4_INO80C	HSPA4	INO80C	-0.105101	0.28596	0.125109	0.203501	BRCA_chr5	1	7	6	66	0.142857	Promiscuous	Non-aggregation prone
HSPA4_KANSL1	HSPA4	KANSL1	0.354717	0.000205024	-0.0351426	0.725846	BRCA_chr5	1	8	6	66	0.125	Promiscuous	Non-aggregation prone
HSPA4_KAT8	HSPA4	KAT8	0.30084	0.00181859	0.225223	0.020889	BRCA_chr5	1	11	6	66	0.0909091	Promiscuous	Non-aggregation prone
HSPA4_KDM6B	HSPA4	KDM6B	0.274601	0.00458474	-0.147463	0.172878	BRCA_chr5	1	30	6	66	0.0333333	Promiscuous	Non-aggregation prone
HSPA4_KMT2A	HSPA4	KMT2A	0.336824	0.000442505	-0.234584	0.0160089	BRCA_chr5	1	12	6	66	0.0833333	Promiscuous	Non-aggregation prone
HSPA4_LAS1L	HSPA4	LAS1L	0.304738	0.00157343	-0.00447854	0.963835	BRCA_chr5	1	8	6	66	0.125	Promiscuous	Non-aggregation prone
HSPA4_MAP2K5	HSPA4	MAP2K5	0.393718	3.24959e-05	0.105401	0.284576	BRCA_chr5	1	7	6	66	0.142857	Promiscuous	Non-aggregation prone
HSPA4_MAP3K3	HSPA4	MAP3K3	0.167624	0.0874161	-0.165115	0.0923272	BRCA_chr5	1	8	6	66	0.125	Promiscuous	Non-aggregation prone
HSPA4_MARK2	HSPA4	MARK2	0.0583454	0.55438	-0.141375	0.150277	BRCA_chr5	1	6	6	66	0.166667	Promiscuous	Non-aggregation prone
HSPA4_MCRS1	HSPA4	MCRS1	0.406262	1.70736e-05	-0.00376322	0.969608	BRCA_chr5	1	10	6	66	0.1	Promiscuous	Non-aggregation prone
HSPA4_MYH10	HSPA4	MYH10	0.329722	0.000593033	0.0129691	0.895531	BRCA_chr5	1	6	6	66	0.166667	Promiscuous	Non-aggregation prone
HSPA4_NCL	HSPA4	NCL	0.144941	0.140152	-0.0620257	0.529629	BRCA_chr5	2	12	6	66	0.166667	Promiscuous	Non-aggregation prone
HSPA4_NONO	HSPA4	NONO	0.368588	0.00010936	0.197916	0.0429879	BRCA_chr5	2	13	6	66	0.153846	Promiscuous	Non-aggregation prone
HSPA4_OGT	HSPA4	OGT	0.25734	0.00804503	0.0102011	0.917739	BRCA_chr5	1	15	6	66	0.0666667	Promiscuous	Non-aggregation prone
HSPA4_PARP1	HSPA4	PARP1	0.362119	0.000147129	0.0656749	0.505647	BRCA_chr5	2	18	6	66	0.111111	Promiscuous	Non-aggregation prone
HSPA4_PDRG1	HSPA4	PDRG1	0.132428	0.178084	-0.0251607	0.798897	BRCA_chr5	1	6	6	66	0.166667	Promiscuous	Non-aggregation prone
HSPA4_PELP1	HSPA4	PELP1	0.234356	0.0161149	0.015084	0.878617	BRCA_chr5	1	9	6	66	0.111111	Promiscuous	Non-aggregation prone
HSPA4_PFDN2	HSPA4	PFDN2	-0.191997	0.0497479	-0.00829359	0.933082	BRCA_chr5	1	9	6	66	0.111111	Promiscuous	Non-aggregation prone
HSPA4_PHF20	HSPA4	PHF20	0.535497	3.9601e-09	-0.0271547	0.808652	BRCA_chr5	1	7	6	66	0.142857	Promiscuous	Non-aggregation prone
HSPA4_PRPF31	HSPA4	PRPF31	0.0210865	0.83093	0.11244	0.253452	BRCA_chr5	1	7	6	66	0.142857	Promiscuous	Non-aggregation prone
HSPA4_RBBP4	HSPA4	RBBP4	0.33616	0.000454912	0.0921107	0.350023	BRCA_chr5	1	52	6	66	0.0192308	Promiscuous	Non-aggregation prone
HSPA4_RBBP7	HSPA4	RBBP7	0.370775	9.87808e-05	0.20254	0.0382561	BRCA_chr5	1	39	6	66	0.025641	Promiscuous	Non-aggregation prone
HSPA4_RNF2	HSPA4	RNF2	0.305028	0.00155643	0.0155505	0.874892	BRCA_chr5	1	13	6	66	0.0769231	Promiscuous	Non-aggregation prone
HSPA4_SAP30	HSPA4	SAP30	0.235735	0.0154833	-0.0322206	0.744201	BRCA_chr5	1	22	6	66	0.0454545	Promiscuous	Non-aggregation prone
HSPA4_SENP3	HSPA4	SENP3	0.157837	0.107816	-0.0978644	0.320615	BRCA_chr5	1	8	6	66	0.125	Promiscuous	Non-aggregation prone
HSPA4_SETD1A	HSPA4	SETD1A	0.342474	0.000348787	0.0814327	0.408906	BRCA_chr5	1	9	6	66	0.111111	Promiscuous	Non-aggregation prone
HSPA4_SIN3A	HSPA4	SIN3A	0.423471	6.76321e-06	-0.0387414	0.69478	BRCA_chr5	1	45	6	66	0.0222222	Promiscuous	Non-aggregation prone
HSPA4_SIN3B	HSPA4	SIN3B	0.117862	0.231131	0.0358076	0.716872	BRCA_chr5	1	11	6	66	0.0909091	Promiscuous	Non-aggregation prone
HSPA4_SP1	HSPA4	SP1	0.543645	2.06099e-09	0.265416	0.00621143	BRCA_chr5	1	11	6	66	0.0909091	Promiscuous	Non-aggregation prone
HSPA4_SUDS3	HSPA4	SUDS3	0.428416	5.13392e-06	0.269988	0.0053469	BRCA_chr5	1	10	6	66	0.1	Promiscuous	Non-aggregation prone
HSPA4_TAF1	HSPA4	TAF1	0.489446	1.16788e-07	0.0887414	0.368002	BRCA_chr5	1	20	6	66	0.05	Promiscuous	Non-aggregation prone
HSPA4_TAF4	HSPA4	TAF4	0.296351	0.00214341	0.174622	0.0748087	BRCA_chr5	1	25	6	66	0.04	Promiscuous	Non-aggregation prone
HSPA4_TAF6	HSPA4	TAF6	0.117468	0.232705	0.177151	0.0706288	BRCA_chr5	1	27	6	66	0.037037	Promiscuous	Non-aggregation prone
HSPA4_TEX10	HSPA4	TEX10	0.191271	0.050634	-0.210533	0.0311056	BRCA_chr5	1	9	6	66	0.111111	Promiscuous	Non-aggregation prone
HSPA4_TLE1	HSPA4	TLE1	-0.0806552	0.413408	0.00526643	0.957478	BRCA_chr5	2	15	6	66	0.133333	Promiscuous	Non-aggregation prone
HSPA4_TOP2B	HSPA4	TOP2B	0.412078	1.25567e-05	-0.116224	0.237724	BRCA_chr5	2	7	6	66	0.285714	Promiscuous	Non-aggregation prone
HSPA4_TRAF7	HSPA4	TRAF7	0.262026	0.00693035	0.0065312	0.947279	BRCA_chr5	1	6	6	66	0.166667	Promiscuous	Non-aggregation prone
HSPA4_WDR5	HSPA4	WDR5	0.0585217	0.553182	-0.0966722	0.326574	BRCA_chr5	2	31	6	66	0.0645161	Promiscuous	Non-aggregation prone
HSPA4_YWHAE	HSPA4	YWHAE	0.22796	0.0193451	0.247139	0.0110327	BRCA_chr5	1	12	6	66	0.0833333	Promiscuous	Non-aggregation prone
HSPA4_YWHAG	HSPA4	YWHAG	0.250622	0.00991834	0.0463405	0.638772	BRCA_chr5	1	7	6	66	0.142857	Promiscuous	Non-aggregation prone
HSPA4_YWHAH	HSPA4	YWHAH	0.122984	0.211346	-0.0600352	0.542947	BRCA_chr5	1	6	6	66	0.166667	Promiscuous	Non-aggregation prone
HSPA4_YWHAQ	HSPA4	YWHAQ	0.0915302	0.353081	0.0185776	0.850797	BRCA_chr5	1	10	6	66	0.1	Promiscuous	Non-aggregation prone
HSPA4_YWHAZ	HSPA4	YWHAZ	0.0206718	0.834207	0.0838586	0.395043	BRCA_chr5	1	7	6	66	0.142857	Promiscuous	Non-aggregation prone
HSPA9_AFG3L2	HSPA9	AFG3L2	0.318039	0.000945713	0.270962	0.00517711	BRCA_chr5	1	5	5	9	0.2	Non-promiscuous	Non-aggregation prone
HSPA9_FXN	HSPA9	FXN	0.0790068	0.42305	-0.0326353	0.741024	BRCA_chr5	1	5	5	9	0.2	Non-promiscuous	Non-aggregation prone
HSPA9_GRPEL1	HSPA9	GRPEL1	0.336119	0.000455698	0.486461	1.43022e-07	BRCA_chr5	3	6	5	9	0.5	Non-promiscuous	Non-aggregation prone
HSPA9_HSPD1	HSPA9	HSPD1	0.330075	0.000584573	0.158708	0.105862	BRCA_chr5	1	6	5	9	0.166667	Non-promiscuous	Non-aggregation prone
HSPA9_LYRM4	HSPA9	LYRM4	-0.18588	0.0576322	0.16216	0.0983883	BRCA_chr5	1	5	5	9	0.2	Non-promiscuous	Non-aggregation prone
HSPA9_TIMM44	HSPA9	TIMM44	-0.128167	0.192581	0.257454	0.00801613	BRCA_chr5	1	6	5	9	0.166667	Non-promiscuous	Non-aggregation prone
IKBKB_BCL10	IKBKB	BCL10	-0.0490825	0.649739	-0.0101455	0.925256	COREAD_chr8	1	21	15	61	0.047619	Promiscuous	Non-aggregation prone
IKBKB_CASP8	IKBKB	CASP8	0.0695115	0.51988	-0.188995	0.0778146	COREAD_chr8	1	27	15	61	0.037037	Promiscuous	Non-aggregation prone
IKBKB_CD3EAP	IKBKB	CD3EAP	0.382216	0.000238035	0.0559826	0.604416	COREAD_chr8	1	15	15	61	0.0666667	Promiscuous	Non-aggregation prone
IKBKB_CDC37	IKBKB	CDC37	0.266017	0.0122418	0.0476441	0.659357	COREAD_chr8	2	25	15	61	0.08	Promiscuous	Non-aggregation prone
IKBKB_CHUK	IKBKB	CHUK	-0.0109542	0.919318	0.26002	0.0144225	COREAD_chr8	12	25	15	61	0.48	Promiscuous	Non-aggregation prone
IKBKB_CREBBP	IKBKB	CREBBP	0.435966	2.17934e-05	0.237179	0.0260827	COREAD_chr8	1	36	15	61	0.0277778	Promiscuous	Non-aggregation prone
IKBKB_CUL1	IKBKB	CUL1	0.155683	0.147504	0.0931163	0.388195	COREAD_chr8	1	52	15	61	0.0192308	Promiscuous	Non-aggregation prone
IKBKB_ERC1	IKBKB	ERC1	0.202089	0.059001	0.231007	0.0303543	COREAD_chr8	1	15	15	61	0.0666667	Promiscuous	Non-aggregation prone
IKBKB_FBL	IKBKB	FBL	0.218943	0.0404197	-0.214968	0.0442913	COREAD_chr8	1	18	15	61	0.0555556	Promiscuous	Non-aggregation prone
IKBKB_FBXW11	IKBKB	FBXW11	-0.0290409	0.788246	0.431963	2.64152e-05	COREAD_chr8	1	18	15	61	0.0555556	Promiscuous	Non-aggregation prone
IKBKB_HSP90AA1	IKBKB	HSP90AA1	0.139181	0.195916	-0.182304	0.0891323	COREAD_chr8	2	31	15	61	0.0645161	Promiscuous	Non-aggregation prone
IKBKB_HSP90AB1	IKBKB	HSP90AB1	0.230355	0.0308387	-0.0681873	0.527882	COREAD_chr8	2	28	15	61	0.0714286	Promiscuous	Non-aggregation prone
IKBKB_IKBKG	IKBKB	IKBKG	0.131785	0.220982	0.143663	0.181763	COREAD_chr8	9	26	15	61	0.346154	Promiscuous	Non-aggregation prone
IKBKB_IQGAP2	IKBKB	IQGAP2	-0.108855	0.31271	-0.119482	0.267519	COREAD_chr8	1	16	15	61	0.0625	Promiscuous	Non-aggregation prone
IKBKB_KPNA2	IKBKB	KPNA2	0.164137	0.126486	-0.0132365	0.902583	COREAD_chr8	1	18	15	61	0.0555556	Promiscuous	Non-aggregation prone
IKBKB_LRPPRC	IKBKB	LRPPRC	0.0841992	0.435419	-0.100608	0.350997	COREAD_chr8	1	15	15	61	0.0666667	Promiscuous	Non-aggregation prone
IKBKB_MALT1	IKBKB	MALT1	-0.1964	0.0666599	0.0117625	0.913387	COREAD_chr8	1	23	15	61	0.0434783	Promiscuous	Non-aggregation prone
IKBKB_MTIF2	IKBKB	MTIF2	0.139393	0.195232	-0.0362348	0.737502	COREAD_chr8	1	15	15	61	0.0666667	Promiscuous	Non-aggregation prone
IKBKB_NFKB1	IKBKB	NFKB1	-0.0211863	0.844669	-0.0491936	0.648998	COREAD_chr8	1	27	15	61	0.037037	Promiscuous	Non-aggregation prone
IKBKB_NFKB2	IKBKB	NFKB2	0.0963686	0.371765	-0.0111357	0.917985	COREAD_chr8	2	21	15	61	0.0952381	Promiscuous	Non-aggregation prone
IKBKB_NFKBIB	IKBKB	NFKBIB	0.263235	0.013215	0.237497	0.0258777	COREAD_chr8	1	20	15	61	0.05	Promiscuous	Non-aggregation prone
IKBKB_POLR1A	IKBKB	POLR1A	0.263675	0.0130567	-0.101463	0.346896	COREAD_chr8	1	15	15	61	0.0666667	Promiscuous	Non-aggregation prone
IKBKB_POLR1B	IKBKB	POLR1B	0.301064	0.00436789	0.0447348	0.678979	COREAD_chr8	1	17	15	61	0.0588235	Promiscuous	Non-aggregation prone
IKBKB_POLR1D	IKBKB	POLR1D	0.0607587	0.573886	0.281129	0.00797187	COREAD_chr8	1	15	15	61	0.0666667	Promiscuous	Non-aggregation prone
IKBKB_POLR1E	IKBKB	POLR1E	0.221743	0.037865	0.0777775	0.471354	COREAD_chr8	1	15	15	61	0.0666667	Promiscuous	Non-aggregation prone
IKBKB_POLR2H	IKBKB	POLR2H	0.266651	0.012029	-0.0335988	0.755978	COREAD_chr8	1	20	15	61	0.05	Promiscuous	Non-aggregation prone
IKBKB_RBCK1	IKBKB	RBCK1	-0.116533	0.279591	0.299854	0.00453569	COREAD_chr8	1	16	15	61	0.0625	Promiscuous	Non-aggregation prone
IKBKB_RELA	IKBKB	RELA	0.29092	0.00596332	0.0974833	0.366232	COREAD_chr8	3	34	15	61	0.0882353	Promiscuous	Non-aggregation prone
IKBKB_RIPK1	IKBKB	RIPK1	-0.035557	0.742239	-0.136017	0.206377	COREAD_chr8	1	17	15	61	0.0588235	Promiscuous	Non-aggregation prone
IKBKB_RNF31	IKBKB	RNF31	0.323976	0.0020755	0.328805	0.0017611	COREAD_chr8	1	16	15	61	0.0625	Promiscuous	Non-aggregation prone
IKBKB_RPL4	IKBKB	RPL4	-0.252545	0.017605	-0.205088	0.0552608	COREAD_chr8	1	18	15	61	0.0555556	Promiscuous	Non-aggregation prone
IKBKB_RPL6	IKBKB	RPL6	-0.137209	0.202391	-0.22022	0.0392371	COREAD_chr8	1	19	15	61	0.0526316	Promiscuous	Non-aggregation prone
IKBKB_RPS11	IKBKB	RPS11	-0.164806	0.124926	-0.244957	0.0214363	COREAD_chr8	1	19	15	61	0.0526316	Promiscuous	Non-aggregation prone
IKBKB_RPS13	IKBKB	RPS13	0.00186679	0.986228	-0.0542622	0.615585	COREAD_chr8	1	20	15	61	0.05	Promiscuous	Non-aggregation prone
IKBKB_SEC16A	IKBKB	SEC16A	0.24897	0.0193297	0.053937	0.617707	COREAD_chr8	1	15	15	61	0.0666667	Promiscuous	Non-aggregation prone
IKBKB_SKP1	IKBKB	SKP1	-0.216988	0.042287	-0.0673021	0.533265	COREAD_chr8	1	52	15	61	0.0192308	Promiscuous	Non-aggregation prone
IKBKB_TAB1	IKBKB	TAB1	0.212691	0.0466446	0.0962159	0.372527	COREAD_chr8	1	18	15	61	0.0555556	Promiscuous	Non-aggregation prone
IKBKB_TNIP1	IKBKB	TNIP1	-0.0956641	0.375287	-0.0503324	0.641427	COREAD_chr8	1	16	15	61	0.0625	Promiscuous	Non-aggregation prone
IKBKB_TRADD	IKBKB	TRADD	0.128932	0.23123	-0.021042	0.845713	COREAD_chr8	1	19	15	61	0.0526316	Promiscuous	Non-aggregation prone
IKBKB_TRAF2	IKBKB	TRAF2	0.314026	0.00288758	0.0920485	0.393683	COREAD_chr8	1	23	15	61	0.0434783	Promiscuous	Non-aggregation prone
INTS6_INTS1	INTS6	INTS1	-0.213237	0.0460712	0.28562	0.00698666	COREAD_chr13	2	3	3	17	0.666667	Non-promiscuous	Non-aggregation prone
INTS6_INTS10	INTS6	INTS10	0.341393	0.00113334	-0.1564	0.145626	COREAD_chr13	3	3	3	17	1	Non-promiscuous	Non-aggregation prone
INTS6_INTS2	INTS6	INTS2	0.37297	0.000345184	-0.0614512	0.56952	COREAD_chr13	3	3	3	17	1	Non-promiscuous	Non-aggregation prone
INTS6_INTS3	INTS6	INTS3	0.288542	0.00640472	-0.0217654	0.840478	COREAD_chr13	2	3	3	17	0.666667	Non-promiscuous	Non-aggregation prone
INTS6_INTS4	INTS6	INTS4	0.307879	0.00352168	0.0557079	0.606193	COREAD_chr13	3	3	3	17	1	Non-promiscuous	Non-aggregation prone
INTS6_INTS5	INTS6	INTS5	-0.187665	0.0799674	0.235525	0.0271742	COREAD_chr13	3	3	3	17	1	Non-promiscuous	Non-aggregation prone
INTS6_INTS7	INTS6	INTS7	0.509334	4.02603e-07	-0.112292	0.297583	COREAD_chr13	3	3	3	17	1	Non-promiscuous	Non-aggregation prone
INTS6_INTS8	INTS6	INTS8	0.550527	2.7468e-08	0.19888	0.0632274	COREAD_chr13	3	3	3	17	1	Non-promiscuous	Non-aggregation prone
INTS6_INTS9	INTS6	INTS9	0.00956289	0.929537	0.0194971	0.856916	COREAD_chr13	3	3	3	17	1	Non-promiscuous	Non-aggregation prone
INTS6_POLR2A	INTS6	POLR2A	-0.187471	0.080285	-0.0568648	0.598723	COREAD_chr13	1	28	3	17	0.0357143	Non-promiscuous	Non-aggregation prone
INTS6_POLR2B	INTS6	POLR2B	0.410447	7.13365e-05	-0.121317	0.260189	COREAD_chr13	1	12	3	17	0.0833333	Non-promiscuous	Non-aggregation prone
ITCH_CPSF6	ITCH	CPSF6	0.548227	1.41652e-09	-0.0591437	0.548964	BRCA_chr20	3	7	5	7	0.428571	Non-promiscuous	Non-aggregation prone
ITCH_DTX3L	ITCH	DTX3L	0.606179	7.26619e-12	-0.0530997	0.590593	BRCA_chr20	1	7	5	7	0.142857	Non-promiscuous	Non-aggregation prone
ITCH_EWSR1	ITCH	EWSR1	0.153162	0.11879	-0.0249015	0.800926	BRCA_chr20	1	6	5	7	0.166667	Non-promiscuous	Non-aggregation prone
ITCH_NUDT21	ITCH	NUDT21	0.483216	1.77871e-07	0.0293282	0.766473	BRCA_chr20	3	7	5	7	0.428571	Non-promiscuous	Non-aggregation prone
ITCH_POLR2A	ITCH	POLR2A	0.494163	8.44578e-08	-0.0193863	0.844383	BRCA_chr20	3	28	5	7	0.107143	Non-promiscuous	Non-aggregation prone
ITCH_UBAP2L	ITCH	UBAP2L	0.513114	2.18394e-08	-0.170993	0.0811498	BRCA_chr20	2	6	5	7	0.333333	Non-promiscuous	Non-aggregation prone
ITCH_USP9X	ITCH	USP9X	0.680904	1.33227e-15	0.233371	0.0165796	BRCA_chr20	1	5	5	7	0.2	Non-promiscuous	Non-aggregation prone
JADE2_ING4	JADE2	ING4	0.377027	7.35607e-05	0.182418	0.0625315	BRCA_chr5	1	4	2	4	0.25	Non-promiscuous	Non-aggregation prone
JADE2_ING5	JADE2	ING5	0.266297	0.00603574	-0.0496786	0.614773	BRCA_chr5	1	7	2	4	0.142857	Non-promiscuous	Non-aggregation prone
JADE2_KAT7	JADE2	KAT7	0.406635	1.67431e-05	0.180261	0.0657504	BRCA_chr5	2	6	2	4	0.333333	Non-promiscuous	Non-aggregation prone
JADE2_MEAF6	JADE2	MEAF6	0.279204	0.00392244	-0.16384	0.0949058	BRCA_chr5	2	13	2	4	0.153846	Non-promiscuous	Non-aggregation prone
KIF3B_KIF3A	KIF3B	KIF3A	0.77034	0	0.654365	3.73035e-14	BRCA_chr20	1	1	1	4	1	Non-promiscuous	Non-aggregation prone
KIF3B_PARD3	KIF3B	PARD3	0.0985175	0.317381	0.216079	0.0268376	BRCA_chr20	1	10	1	4	0.1	Non-promiscuous	Non-aggregation prone
KIF3B_PRKCI	KIF3B	PRKCI	0.450653	1.407e-06	-0.26835	0.00564348	BRCA_chr20	1	8	1	4	0.125	Non-promiscuous	Non-aggregation prone
KPNA3_CHUK	KPNA3	CHUK	0.571783	5.92897e-09	-0.10478	0.331276	COREAD_chr13	1	23	2	19	0.0434783	Non-promiscuous	Non-aggregation prone
KPNA3_CTCF	KPNA3	CTCF	0.514177	2.98994e-07	0.0708643	0.511769	COREAD_chr13	1	5	2	19	0.2	Non-promiscuous	Non-aggregation prone
KPNA3_HIST2H2AA3	KPNA3	HIST2H2AA3	0.173487	0.105993	0.0235201	0.827808	COREAD_chr13	1	2	2	19	0.5	Non-promiscuous	Non-aggregation prone
KPNA3_IKBKG	KPNA3	IKBKG	-0.100947	0.349363	0.0765561	0.478366	COREAD_chr13	1	21	2	19	0.047619	Non-promiscuous	Non-aggregation prone
KPNA3_KPNA1	KPNA3	KPNA1	0.681624	2.67342e-13	0.245668	0.0210492	COREAD_chr13	1	3	2	19	0.333333	Non-promiscuous	Non-aggregation prone
KPNA3_LMNA	KPNA3	LMNA	-0.14841	0.1676	0.133126	0.216277	COREAD_chr13	1	5	2	19	0.2	Non-promiscuous	Non-aggregation prone
KPNA3_NFKB1	KPNA3	NFKB1	0.0800606	0.458398	-0.244017	0.0219572	COREAD_chr13	1	14	2	19	0.0714286	Non-promiscuous	Non-aggregation prone
KPNA3_NFKB2	KPNA3	NFKB2	-0.334666	0.00143764	-0.118322	0.272228	COREAD_chr13	1	9	2	19	0.111111	Non-promiscuous	Non-aggregation prone
KPNA3_NFKBIB	KPNA3	NFKBIB	-0.0796027	0.46098	-0.028691	0.790739	COREAD_chr13	1	7	2	19	0.142857	Non-promiscuous	Non-aggregation prone
KPNA3_PARP1	KPNA3	PARP1	0.270878	0.0106909	-0.0391393	0.717316	COREAD_chr13	1	15	2	19	0.0666667	Non-promiscuous	Non-aggregation prone
KPNA3_RELA	KPNA3	RELA	0.142404	0.18566	-0.0451345	0.67627	COREAD_chr13	1	23	2	19	0.0434783	Non-promiscuous	Non-aggregation prone
KPNA3_TOP2A	KPNA3	TOP2A	0.610458	2.70705e-10	0.23467	0.0277537	COREAD_chr13	1	7	2	19	0.142857	Non-promiscuous	Non-aggregation prone
LAMB2_ITGA6	LAMB2	ITGA6	0.203838	0.0261791	0.377874	2.26741e-05	OV_chr3	1	11	1	4	0.0909091	Non-promiscuous	Non-aggregation prone
LAMB2_ITGB4	LAMB2	ITGB4	0.456117	1.85756e-07	0.307948	0.000656713	OV_chr3	1	9	1	4	0.111111	Non-promiscuous	Non-aggregation prone
LAMB2_LAMA5	LAMB2	LAMA5	0.636384	7.32747e-15	0.838598	0	OV_chr3	1	3	1	4	0.333333	Non-promiscuous	Non-aggregation prone
LAMB2_LAMC1	LAMB2	LAMC1	0.345392	0.000119521	0.760967	0	OV_chr3	1	2	1	4	0.5	Non-promiscuous	Non-aggregation prone
LMO7_ACTB	LMO7	ACTB	-0.0166954	0.877303	0.132994	0.216738	COREAD_chr13	2	23	2	14	0.0869565	Non-promiscuous	Non-aggregation prone
LMO7_BANF1	LMO7	BANF1	0.126343	0.240811	-0.288167	0.00647687	COREAD_chr13	1	6	2	14	0.166667	Non-promiscuous	Non-aggregation prone
LMO7_CNN3	LMO7	CNN3	0.0981297	0.363047	-0.200992	0.0604184	COREAD_chr13	1	2	2	14	0.5	Non-promiscuous	Non-aggregation prone
LMO7_EMD	LMO7	EMD	-0.1212	0.26065	0.163237	0.128608	COREAD_chr13	2	9	2	14	0.222222	Non-promiscuous	Non-aggregation prone
LMO7_HDAC1	LMO7	HDAC1	0.108978	0.312159	-0.104192	0.334011	COREAD_chr13	1	77	2	14	0.012987	Non-promiscuous	Non-aggregation prone
LMO7_HDAC3	LMO7	HDAC3	0.132524	0.218379	-0.241331	0.0235062	COREAD_chr13	1	16	2	14	0.0625	Non-promiscuous	Non-aggregation prone
LMO7_HIST1H3A	LMO7	HIST1H3A	-0.0704868	0.514025	0.0111656	0.917766	COREAD_chr13	1	12	2	14	0.0833333	Non-promiscuous	Non-aggregation prone
LMO7_MYH9	LMO7	MYH9	0.0477264	0.658805	0.202004	0.0591095	COREAD_chr13	1	3	2	14	0.333333	Non-promiscuous	Non-aggregation prone
LMO7_MYO1E	LMO7	MYO1E	0.195291	0.0682436	0.00118879	0.991229	COREAD_chr13	1	2	2	14	0.5	Non-promiscuous	Non-aggregation prone
LMO7_SPTAN1	LMO7	SPTAN1	0.193354	0.0710815	0.396518	0.000131033	COREAD_chr13	1	5	2	14	0.2	Non-promiscuous	Non-aggregation prone
LRP1_ANXA6	LRP1	ANXA6	0.557898	4.35749e-11	0.685579	0	OV_chr12	1	4	4	7	0.25	Non-promiscuous	Non-aggregation prone
LRP1_APBB1	LRP1	APBB1	0.378593	2.18098e-05	0.351268	0.0225481	OV_chr12	1	6	4	7	0.166667	Non-promiscuous	Non-aggregation prone
LRP1_APP	LRP1	APP	0.46383	1.08025e-07	0.232738	0.0108608	OV_chr12	1	16	4	7	0.0625	Non-promiscuous	Non-aggregation prone
LRP1_CD44	LRP1	CD44	0.35611	7.04339e-05	0.324534	0.000317184	OV_chr12	1	5	4	7	0.2	Non-promiscuous	Non-aggregation prone
LRP1_MMP9	LRP1	MMP9	0.415909	2.55033e-06	0.128694	0.261471	OV_chr12	1	4	4	7	0.25	Non-promiscuous	Non-aggregation prone
LRP1_TIMP1	LRP1	TIMP1	0.0289275	0.754815	0.259692	0.00469099	OV_chr12	1	4	4	7	0.25	Non-promiscuous	Non-aggregation prone
LYN_CBL	LYN	CBL	0.257634	0.015379	-0.0308597	0.775324	COREAD_chr8	1	20	5	11	0.05	Non-promiscuous	Non-aggregation prone
LYN_GRB2	LYN	GRB2	0.541633	5.05709e-08	-0.00596155	0.956039	COREAD_chr8	1	20	5	11	0.05	Non-promiscuous	Non-aggregation prone
LYN_LCK	LYN	LCK	0.356345	0.000655351	0.567451	8.17531e-09	COREAD_chr8	1	11	5	11	0.0909091	Non-promiscuous	Non-aggregation prone
LYN_LCP2	LYN	LCP2	0.497411	8.21512e-07	0.121319	0.260178	COREAD_chr8	1	14	5	11	0.0714286	Non-promiscuous	Non-aggregation prone
LYN_PLCG2	LYN	PLCG2	0.339139	0.00122808	0.149098	0.165616	COREAD_chr8	2	9	5	11	0.222222	Non-promiscuous	Non-aggregation prone
LYN_RASA1	LYN	RASA1	0.139181	0.195916	0.0806586	0.455037	COREAD_chr8	1	8	5	11	0.125	Non-promiscuous	Non-aggregation prone
LYN_YES1	LYN	YES1	0.576803	4.06235e-09	0.479526	2.27949e-06	COREAD_chr8	1	5	5	11	0.2	Non-promiscuous	Non-aggregation prone
MAD1L1_MAD2L1	MAD1L1	MAD2L1	-0.170154	0.0643017	0.0686961	0.477841	OV_chr7	1	4	2	1	0.25	Non-promiscuous	Aggregation prone
MARS_AIMP1	MARS	AIMP1	0.0955491	0.301285	0.469748	7.06185e-08	OV_chr12	1	2	1	10	0.5	Non-promiscuous	Non-aggregation prone
MARS_AIMP2	MARS	AIMP2	0.383984	1.62509e-05	0.537466	2.93103e-10	OV_chr12	1	1	1	10	1	Non-promiscuous	Non-aggregation prone
MARS_DARS	MARS	DARS	-0.0464321	0.616062	0.304401	0.00076317	OV_chr12	1	1	1	10	1	Non-promiscuous	Non-aggregation prone
MARS_EEF1E1	MARS	EEF1E1	0.0379362	0.682089	0.805761	0	OV_chr12	1	1	1	10	1	Non-promiscuous	Non-aggregation prone
MARS_EPRS	MARS	EPRS	0.419776	2.01111e-06	0.503703	5.2415e-09	OV_chr12	1	2	1	10	0.5	Non-promiscuous	Non-aggregation prone
MARS_IARS	MARS	IARS	0.446226	3.65193e-07	0.202642	0.0270903	OV_chr12	1	1	1	10	1	Non-promiscuous	Non-aggregation prone
MARS_KARS	MARS	KARS	0.195542	0.0330715	0.118929	0.197661	OV_chr12	1	1	1	10	1	Non-promiscuous	Non-aggregation prone
MARS_LARS	MARS	LARS	0.11796	0.201362	0.318516	0.000415038	OV_chr12	1	1	1	10	1	Non-promiscuous	Non-aggregation prone
MARS_QARS	MARS	QARS	0.190963	0.037493	0.339852	0.000155945	OV_chr12	1	2	1	10	0.5	Non-promiscuous	Non-aggregation prone
MARS_RARS	MARS	RARS	0.112114	0.224772	0.484988	2.27583e-08	OV_chr12	1	2	1	10	0.5	Non-promiscuous	Non-aggregation prone
MAT2B_MAT1A	MAT2B	MAT1A	0.0758864	0.441652	0.550425	1.18097e-09	BRCA_chr5	1	2	2	2	0.5	Non-promiscuous	Non-aggregation prone
MAT2B_MAT2A	MAT2B	MAT2A	0.58474	5.77038e-11	0.779411	0	BRCA_chr5	1	2	2	2	0.5	Non-promiscuous	Non-aggregation prone
MATR3_CDC5L	MATR3	CDC5L	0.325461	0.000704573	0.0280531	0.776354	BRCA_chr5	1	7	3	24	0.142857	Non-promiscuous	Aggregation prone
MATR3_DDB1	MATR3	DDB1	0.296237	0.00215231	-0.14208	0.148233	BRCA_chr5	1	30	3	24	0.0333333	Non-promiscuous	Aggregation prone
MATR3_DDX23	MATR3	DDX23	0.414462	1.1052e-05	0.362762	0.000142896	BRCA_chr5	1	5	3	24	0.2	Non-promiscuous	Aggregation prone
MATR3_EEF1A1	MATR3	EEF1A1	0.249305	0.0103274	-0.264897	0.00631688	BRCA_chr5	1	4	3	24	0.25	Non-promiscuous	Aggregation prone
MATR3_EEF1G	MATR3	EEF1G	-0.262285	0.00687289	-0.161103	0.100632	BRCA_chr5	1	3	3	24	0.333333	Non-promiscuous	Aggregation prone
MATR3_EFTUD2	MATR3	EFTUD2	0.404593	1.8628e-05	-0.200197	0.0405962	BRCA_chr5	1	6	3	24	0.166667	Non-promiscuous	Aggregation prone
MATR3_HEXIM1	MATR3	HEXIM1	0.310802	0.00125111	0.397709	2.6553e-05	BRCA_chr5	1	7	3	24	0.142857	Non-promiscuous	Aggregation prone
MATR3_HNRNPU	MATR3	HNRNPU	0.528551	6.81714e-09	0.207858	0.0333608	BRCA_chr5	1	12	3	24	0.0833333	Non-promiscuous	Aggregation prone
MATR3_HSPA5	MATR3	HSPA5	-0.082542	0.402531	-0.131412	0.181466	BRCA_chr5	1	10	3	24	0.1	Non-promiscuous	Aggregation prone
MATR3_MSH2	MATR3	MSH2	0.253203	0.00915747	-0.0608957	0.537169	BRCA_chr5	1	23	3	24	0.0434783	Non-promiscuous	Aggregation prone
MATR3_NONO	MATR3	NONO	0.302675	0.00169917	0.506324	3.57954e-08	BRCA_chr5	2	10	3	24	0.2	Non-promiscuous	Aggregation prone
MATR3_PRKDC	MATR3	PRKDC	0.53079	5.72971e-09	0.0911051	0.355331	BRCA_chr5	1	17	3	24	0.0588235	Non-promiscuous	Aggregation prone
MATR3_PRPF8	MATR3	PRPF8	0.519428	1.36608e-08	0.0515239	0.601677	BRCA_chr5	1	8	3	24	0.125	Non-promiscuous	Aggregation prone
MATR3_PSPC1	MATR3	PSPC1	0.395874	2.91461e-05	0.363933	0.000135469	BRCA_chr5	1	3	3	24	0.333333	Non-promiscuous	Aggregation prone
MATR3_RBM14	MATR3	RBM14	0.435766	3.38073e-06	0.525679	8.50328e-09	BRCA_chr5	1	3	3	24	0.333333	Non-promiscuous	Aggregation prone
MATR3_SFPQ	MATR3	SFPQ	0.457547	9.24273e-07	0.597781	1.66618e-11	BRCA_chr5	3	8	3	24	0.375	Non-promiscuous	Aggregation prone
MATR3_SNRNP200	MATR3	SNRNP200	0.404904	1.83286e-05	-0.00886378	0.928493	BRCA_chr5	1	5	3	24	0.2	Non-promiscuous	Aggregation prone
MATR3_SNW1	MATR3	SNW1	0.452633	1.2482e-06	0.414783	1.08627e-05	BRCA_chr5	1	6	3	24	0.166667	Non-promiscuous	Aggregation prone
MATR3_TUBB	MATR3	TUBB	-0.135186	0.169138	-0.259745	0.00745456	BRCA_chr5	1	7	3	24	0.142857	Non-promiscuous	Aggregation prone
MATR3_UBR5	MATR3	UBR5	0.617883	2.19269e-12	0.0713975	0.469205	BRCA_chr5	1	4	3	24	0.25	Non-promiscuous	Aggregation prone
MATR3_XRCC5	MATR3	XRCC5	0.321968	0.00081002	-0.369055	0.000107019	BRCA_chr5	1	28	3	24	0.0357143	Non-promiscuous	Aggregation prone
MATR3_XRCC6	MATR3	XRCC6	-0.0412503	0.676088	-0.314441	0.00108782	BRCA_chr5	1	30	3	24	0.0333333	Non-promiscuous	Aggregation prone
MET_CBL	MET	CBL	0.327093	0.00186726	-0.0290844	0.787936	COREAD_chr7	1	18	3	6	0.0555556	Non-promiscuous	Non-aggregation prone
MET_ITGB4	MET	ITGB4	-0.193089	0.0714758	0.0883433	0.41308	COREAD_chr7	1	11	3	6	0.0909091	Non-promiscuous	Non-aggregation prone
MET_SH3KBP1	MET	SH3KBP1	0.335529	0.00139485	-0.0967759	0.369737	COREAD_chr7	1	17	3	6	0.0588235	Non-promiscuous	Non-aggregation prone
MIOS_DEPDC5	MIOS	DEPDC5	0.272009	0.00500004	0.154987	0.114409	BRCA_chr7	1	4	3	8	0.25	Non-promiscuous	Non-aggregation prone
MIOS_NPRL2	MIOS	NPRL2	0.213373	0.028853	-0.0347805	0.732524	BRCA_chr7	2	4	3	8	0.5	Non-promiscuous	Non-aggregation prone
MIOS_NPRL3	MIOS	NPRL3	0.0349057	0.723712	0.0252644	0.798086	BRCA_chr7	2	4	3	8	0.5	Non-promiscuous	Non-aggregation prone
MIOS_SEC13	MIOS	SEC13	-0.108252	0.271677	-0.0335787	0.733814	BRCA_chr7	3	4	3	8	0.75	Non-promiscuous	Non-aggregation prone
MIOS_SEH1L	MIOS	SEH1L	-0.108553	0.27034	0.105816	0.282675	BRCA_chr7	3	4	3	8	0.75	Non-promiscuous	Non-aggregation prone
MIOS_SZT2	MIOS	SZT2	0.251068	0.00978311	0.119894	0.223131	BRCA_chr7	1	4	3	8	0.25	Non-promiscuous	Non-aggregation prone
MIOS_WDR24	MIOS	WDR24	0.269438	0.0054448	0.552208	1.01798e-09	BRCA_chr7	3	3	3	8	1	Non-promiscuous	Non-aggregation prone
MIOS_WDR59	MIOS	WDR59	0.10282	0.296602	0.276664	0.00427646	BRCA_chr7	3	3	3	8	1	Non-promiscuous	Non-aggregation prone
MKLN1_ARMC8	MKLN1	ARMC8	0.65396	3.90799e-14	0.177358	0.0702947	BRCA_chr7	1	2	2	6	0.5	Non-promiscuous	Non-aggregation prone
MKLN1_GID8	MKLN1	GID8	0.205266	0.0356761	0.474725	3.11406e-07	BRCA_chr7	1	4	2	6	0.25	Non-promiscuous	Non-aggregation prone
MKLN1_MAEA	MKLN1	MAEA	0.211694	0.0301675	-0.0881091	0.371439	BRCA_chr7	1	2	2	6	0.5	Non-promiscuous	Non-aggregation prone
MKLN1_MPHOSPH8	MKLN1	MPHOSPH8	0.534833	4.17321e-09	-0.0586461	0.552337	BRCA_chr7	1	3	2	6	0.333333	Non-promiscuous	Non-aggregation prone
MKLN1_RANBP9	MKLN1	RANBP9	0.388358	4.24482e-05	0.462357	6.85619e-07	BRCA_chr7	2	7	2	6	0.285714	Non-promiscuous	Non-aggregation prone
MKLN1_RMND5A	MKLN1	RMND5A	0.522963	1.04606e-08	0.208532	0.0327801	BRCA_chr7	1	2	2	6	0.5	Non-promiscuous	Non-aggregation prone
MPP6_LIN7A	MPP6	LIN7A	-0.345221	0.000310167	0.149616	0.127672	BRCA_chr7	1	5	1	1	0.2	Non-promiscuous	Non-aggregation prone
MRGBP_ACTL6A	MRGBP	ACTL6A	0.545231	1.81126e-09	0.082148	0.404788	BRCA_chr20	3	44	3	16	0.0681818	Non-promiscuous	Non-aggregation prone
MRGBP_BRD8	MRGBP	BRD8	-0.00293386	0.976304	0.199751	0.0410547	BRCA_chr20	3	6	3	16	0.5	Non-promiscuous	Non-aggregation prone
MRGBP_DMAP1	MRGBP	DMAP1	0.202364	0.0384281	0.187394	0.0555917	BRCA_chr20	3	9	3	16	0.333333	Non-promiscuous	Non-aggregation prone
MRGBP_EP400	MRGBP	EP400	0.0653535	0.507736	0.215436	0.0273052	BRCA_chr20	3	7	3	16	0.428571	Non-promiscuous	Non-aggregation prone
MRGBP_EPC1	MRGBP	EPC1	-0.00504872	0.959234	-0.033983	0.730731	BRCA_chr20	3	7	3	16	0.428571	Non-promiscuous	Non-aggregation prone
MRGBP_EPC2	MRGBP	EPC2	-0.1322	0.178839	-0.185359	0.0621584	BRCA_chr20	1	4	3	16	0.25	Non-promiscuous	Non-aggregation prone
MRGBP_ING3	MRGBP	ING3	0.0325627	0.74158	-0.0352063	0.721429	BRCA_chr20	3	5	3	16	0.6	Non-promiscuous	Non-aggregation prone
MRGBP_KAT5	MRGBP	KAT5	0.132086	0.179217	0.363861	0.000135919	BRCA_chr20	3	9	3	16	0.333333	Non-promiscuous	Non-aggregation prone
MRGBP_MEAF6	MRGBP	MEAF6	0.269096	0.00550656	-0.0337342	0.732628	BRCA_chr20	3	13	3	16	0.230769	Non-promiscuous	Non-aggregation prone
MRGBP_MORF4L1	MRGBP	MORF4L1	0.197657	0.043267	0.0664731	0.500477	BRCA_chr20	3	9	3	16	0.333333	Non-promiscuous	Non-aggregation prone
MRGBP_MORF4L2	MRGBP	MORF4L2	0.113747	0.247944	0.433983	3.7447e-06	BRCA_chr20	2	3	3	16	0.666667	Non-promiscuous	Non-aggregation prone
MRGBP_RUVBL2	MRGBP	RUVBL2	0.362575	0.000144113	0.279639	0.00386446	BRCA_chr20	3	14	3	16	0.214286	Non-promiscuous	Non-aggregation prone
MRGBP_TRRAP	MRGBP	TRRAP	0.186461	0.0568424	-0.0346672	0.725523	BRCA_chr20	3	31	3	16	0.0967742	Non-promiscuous	Non-aggregation prone
MRGBP_VPS72	MRGBP	VPS72	0.27824	0.00405361	0.177898	0.0694321	BRCA_chr20	1	5	3	16	0.2	Non-promiscuous	Non-aggregation prone
MRGBP_YEATS4	MRGBP	YEATS4	0.314265	0.00109526	0.3079	0.00139703	BRCA_chr20	3	5	3	16	0.6	Non-promiscuous	Non-aggregation prone
MRPL15_DAP3	MRPL15	DAP3	0.104292	0.289704	0.821574	0	BRCA_chr8	1	3	2	77	0.333333	Non-promiscuous	Non-aggregation prone
MRPL15_LACTB	MRPL15	LACTB	-0.0667116	0.498938	0.26044	0.00729132	BRCA_chr8	2	2	2	77	1	Non-promiscuous	Non-aggregation prone
MRPL15_MRPL1	MRPL15	MRPL1	0.372569	9.08255e-05	0.810025	0	BRCA_chr8	2	2	2	77	1	Non-promiscuous	Non-aggregation prone
MRPL15_MRPL10	MRPL15	MRPL10	-0.0807796	0.412686	0.766805	0	BRCA_chr8	2	2	2	77	1	Non-promiscuous	Non-aggregation prone
MRPL15_MRPL11	MRPL15	MRPL11	0.387186	4.49732e-05	0.0652913	0.508141	BRCA_chr8	2	2	2	77	1	Non-promiscuous	Non-aggregation prone
MRPL15_MRPL12	MRPL15	MRPL12	0.392391	3.47331e-05	0.626011	9.2637e-13	BRCA_chr8	2	2	2	77	1	Non-promiscuous	Non-aggregation prone
MRPL15_MRPL14	MRPL15	MRPL14	0.353276	0.0002185	0.289426	0.00274806	BRCA_chr8	2	2	2	77	1	Non-promiscuous	Non-aggregation prone
MRPL15_MRPL16	MRPL15	MRPL16	0.19944	0.0413772	0.769884	0	BRCA_chr8	2	2	2	77	1	Non-promiscuous	Non-aggregation prone
MRPL15_MRPL17	MRPL15	MRPL17	0.149927	0.126873	0.503566	4.3616e-08	BRCA_chr8	2	2	2	77	1	Non-promiscuous	Non-aggregation prone
MRPL15_MRPL18	MRPL15	MRPL18	0.143935	0.142953	0.226726	0.0200284	BRCA_chr8	2	2	2	77	1	Non-promiscuous	Non-aggregation prone
MRPL15_MRPL19	MRPL15	MRPL19	0.153566	0.117808	0.814825	0	BRCA_chr8	2	2	2	77	1	Non-promiscuous	Non-aggregation prone
MRPL15_MRPL2	MRPL15	MRPL2	0.499896	5.65831e-08	-0.0597657	0.544762	BRCA_chr8	2	2	2	77	1	Non-promiscuous	Non-aggregation prone
MRPL15_MRPL20	MRPL15	MRPL20	0.0383682	0.697576	0.143977	0.142837	BRCA_chr8	2	2	2	77	1	Non-promiscuous	Non-aggregation prone
MRPL15_MRPL21	MRPL15	MRPL21	0.264731	0.00635096	0.815737	0	BRCA_chr8	2	2	2	77	1	Non-promiscuous	Non-aggregation prone
MRPL15_MRPL22	MRPL15	MRPL22	-0.101493	0.302913	0.403027	2.02057e-05	BRCA_chr8	2	2	2	77	1	Non-promiscuous	Non-aggregation prone
MRPL15_MRPL23	MRPL15	MRPL23	0.0623367	0.527563	0.710699	0	BRCA_chr8	2	2	2	77	1	Non-promiscuous	Non-aggregation prone
MRPL15_MRPL24	MRPL15	MRPL24	-0.00031101	0.997488	0.610294	4.79483e-12	BRCA_chr8	2	2	2	77	1	Non-promiscuous	Non-aggregation prone
MRPL15_MRPL27	MRPL15	MRPL27	0.00181422	0.985345	-0.0536388	0.586823	BRCA_chr8	2	2	2	77	1	Non-promiscuous	Non-aggregation prone
MRPL15_MRPL28	MRPL15	MRPL28	0.0536803	0.586533	0.63814	2.44249e-13	BRCA_chr8	2	2	2	77	1	Non-promiscuous	Non-aggregation prone
MRPL15_MRPL3	MRPL15	MRPL3	0.295874	0.00218083	0.329411	0.000600591	BRCA_chr8	2	2	2	77	1	Non-promiscuous	Non-aggregation prone
MRPL15_MRPL30	MRPL15	MRPL30	0.0649907	0.5101	-0.209849	0.0316699	BRCA_chr8	2	2	2	77	1	Non-promiscuous	Non-aggregation prone
MRPL15_MRPL32	MRPL15	MRPL32	-0.0687021	0.486189	-0.0929608	0.345575	BRCA_chr8	2	2	2	77	1	Non-promiscuous	Non-aggregation prone
MRPL15_MRPL33	MRPL15	MRPL33	0.193189	0.04832	0.755961	0	BRCA_chr8	2	2	2	77	1	Non-promiscuous	Non-aggregation prone
MRPL15_MRPL34	MRPL15	MRPL34	-0.141551	0.149764	0.336502	0.000448475	BRCA_chr8	2	2	2	77	1	Non-promiscuous	Non-aggregation prone
MRPL15_MRPL35	MRPL15	MRPL35	-0.0493365	0.617215	0.230282	0.0181131	BRCA_chr8	2	2	2	77	1	Non-promiscuous	Non-aggregation prone
MRPL15_MRPL37	MRPL15	MRPL37	0.389737	3.96462e-05	0.796372	0	BRCA_chr8	2	2	2	77	1	Non-promiscuous	Non-aggregation prone
MRPL15_MRPL38	MRPL15	MRPL38	-0.0712627	0.470046	0.566639	2.96124e-10	BRCA_chr8	2	2	2	77	1	Non-promiscuous	Non-aggregation prone
MRPL15_MRPL39	MRPL15	MRPL39	0.237518	0.0146985	0.834076	0	BRCA_chr8	2	2	2	77	1	Non-promiscuous	Non-aggregation prone
MRPL15_MRPL4	MRPL15	MRPL4	0.220423	0.0238527	0.794588	0	BRCA_chr8	2	2	2	77	1	Non-promiscuous	Non-aggregation prone
MRPL15_MRPL40	MRPL15	MRPL40	-0.0125441	0.898937	0.657817	2.4647e-14	BRCA_chr8	2	2	2	77	1	Non-promiscuous	Non-aggregation prone
MRPL15_MRPL41	MRPL15	MRPL41	-0.0182355	0.853514	0.234999	0.0158178	BRCA_chr8	2	2	2	77	1	Non-promiscuous	Non-aggregation prone
MRPL15_MRPL42	MRPL15	MRPL42	0.0537321	0.586171	0.760626	0	BRCA_chr8	2	2	2	77	1	Non-promiscuous	Non-aggregation prone
MRPL15_MRPL43	MRPL15	MRPL43	-0.119967	0.222849	0.44295	2.226e-06	BRCA_chr8	2	2	2	77	1	Non-promiscuous	Non-aggregation prone
MRPL15_MRPL44	MRPL15	MRPL44	0.0283745	0.77386	0.802312	0	BRCA_chr8	2	2	2	77	1	Non-promiscuous	Non-aggregation prone
MRPL15_MRPL45	MRPL15	MRPL45	-0.0188472	0.848658	0.740981	0	BRCA_chr8	2	2	2	77	1	Non-promiscuous	Non-aggregation prone
MRPL15_MRPL46	MRPL15	MRPL46	-0.00285092	0.976973	0.514452	1.9789e-08	BRCA_chr8	2	2	2	77	1	Non-promiscuous	Non-aggregation prone
MRPL15_MRPL47	MRPL15	MRPL47	0.418961	8.66333e-06	0.10253	0.297976	BRCA_chr8	2	2	2	77	1	Non-promiscuous	Non-aggregation prone
MRPL15_MRPL48	MRPL15	MRPL48	0.247564	0.0108911	-0.07147	0.468752	BRCA_chr8	2	2	2	77	1	Non-promiscuous	Non-aggregation prone
MRPL15_MRPL49	MRPL15	MRPL49	0.120651	0.220202	0.758967	0	BRCA_chr8	2	2	2	77	1	Non-promiscuous	Non-aggregation prone
MRPL15_MRPL50	MRPL15	MRPL50	-0.0752229	0.445666	0.727203	0	BRCA_chr8	2	2	2	77	1	Non-promiscuous	Non-aggregation prone
MRPL15_MRPL51	MRPL15	MRPL51	0.390182	3.87779e-05	0.297978	0.00202003	BRCA_chr8	2	2	2	77	1	Non-promiscuous	Non-aggregation prone
MRPL15_MRPL52	MRPL15	MRPL52	0.151856	0.122005	0.369666	0.000104021	BRCA_chr8	2	2	2	77	1	Non-promiscuous	Non-aggregation prone
MRPL15_MRPL53	MRPL15	MRPL53	0.190587	0.0514813	0.650726	5.72875e-14	BRCA_chr8	2	2	2	77	1	Non-promiscuous	Non-aggregation prone
MRPL15_MRPL54	MRPL15	MRPL54	-0.304541	0.00158506	0.637767	2.54463e-13	BRCA_chr8	2	2	2	77	1	Non-promiscuous	Non-aggregation prone
MRPL15_MRPL55	MRPL15	MRPL55	0.105412	0.284528	0.747553	0	BRCA_chr8	2	2	2	77	1	Non-promiscuous	Non-aggregation prone
MRPL15_MRPL9	MRPL15	MRPL9	0.230593	0.0179534	0.770392	0	BRCA_chr8	2	2	2	77	1	Non-promiscuous	Non-aggregation prone
MRPL15_MRPS10	MRPL15	MRPS10	0.233548	0.0164956	0.742826	0	BRCA_chr8	1	3	2	77	0.333333	Non-promiscuous	Non-aggregation prone
MRPL15_MRPS11	MRPL15	MRPS11	0.0215011	0.827656	0.658408	2.30926e-14	BRCA_chr8	1	3	2	77	0.333333	Non-promiscuous	Non-aggregation prone
MRPL15_MRPS12	MRPL15	MRPS12	0.347688	0.000278884	-0.202737	0.0380646	BRCA_chr8	1	3	2	77	0.333333	Non-promiscuous	Non-aggregation prone
MRPL15_MRPS14	MRPL15	MRPS14	-0.160605	0.101702	-0.0298258	0.762627	BRCA_chr8	1	3	2	77	0.333333	Non-promiscuous	Non-aggregation prone
MRPL15_MRPS15	MRPL15	MRPS15	0.300591	0.00183536	-0.302115	0.00173483	BRCA_chr8	1	3	2	77	0.333333	Non-promiscuous	Non-aggregation prone
MRPL15_MRPS16	MRPL15	MRPS16	0.133133	0.175765	0.123512	0.209374	BRCA_chr8	1	3	2	77	0.333333	Non-promiscuous	Non-aggregation prone
MRPL15_MRPS17	MRPL15	MRPS17	0.38671	4.60407e-05	0.737954	0	BRCA_chr8	1	3	2	77	0.333333	Non-promiscuous	Non-aggregation prone
MRPL15_MRPS18A	MRPL15	MRPS18A	0.367251	0.000116337	-0.171294	0.0806086	BRCA_chr8	1	3	2	77	0.333333	Non-promiscuous	Non-aggregation prone
MRPL15_MRPS18B	MRPL15	MRPS18B	0.201742	0.0390403	0.275285	0.00448036	BRCA_chr8	1	3	2	77	0.333333	Non-promiscuous	Non-aggregation prone
MRPL15_MRPS18C	MRPL15	MRPS18C	0.179515	0.0668955	0.645884	1.0103e-13	BRCA_chr8	1	3	2	77	0.333333	Non-promiscuous	Non-aggregation prone
MRPL15_MRPS2	MRPL15	MRPS2	0.317956	0.000948788	0.0161932	0.869766	BRCA_chr8	1	3	2	77	0.333333	Non-promiscuous	Non-aggregation prone
MRPL15_MRPS21	MRPL15	MRPS21	0.157537	0.108497	0.591955	2.9222e-11	BRCA_chr8	1	3	2	77	0.333333	Non-promiscuous	Non-aggregation prone
MRPL15_MRPS22	MRPL15	MRPS22	0.271076	0.00515756	0.685797	6.66134e-16	BRCA_chr8	1	3	2	77	0.333333	Non-promiscuous	Non-aggregation prone
MRPL15_MRPS23	MRPL15	MRPS23	0.121118	0.21841	0.535227	4.04538e-09	BRCA_chr8	1	3	2	77	0.333333	Non-promiscuous	Non-aggregation prone
MRPL15_MRPS24	MRPL15	MRPS24	0.0558366	0.571565	0.00934066	0.924657	BRCA_chr8	1	3	2	77	0.333333	Non-promiscuous	Non-aggregation prone
MRPL15_MRPS25	MRPL15	MRPS25	0.193313	0.048173	0.220382	0.0238798	BRCA_chr8	1	3	2	77	0.333333	Non-promiscuous	Non-aggregation prone
MRPL15_MRPS27	MRPL15	MRPS27	-0.213011	0.0291328	0.59124	3.12845e-11	BRCA_chr8	1	3	2	77	0.333333	Non-promiscuous	Non-aggregation prone
MRPL15_MRPS30	MRPL15	MRPS30	-0.295231	0.0022322	0.459382	8.25184e-07	BRCA_chr8	1	3	2	77	0.333333	Non-promiscuous	Non-aggregation prone
MRPL15_MRPS31	MRPL15	MRPS31	-0.0389799	0.692995	0.66215	1.46549e-14	BRCA_chr8	1	3	2	77	0.333333	Non-promiscuous	Non-aggregation prone
MRPL15_MRPS33	MRPL15	MRPS33	0.130355	0.185035	0.0656956	0.505512	BRCA_chr8	1	3	2	77	0.333333	Non-promiscuous	Non-aggregation prone
MRPL15_MRPS34	MRPL15	MRPS34	0.0204126	0.836256	0.473554	3.36026e-07	BRCA_chr8	1	3	2	77	0.333333	Non-promiscuous	Non-aggregation prone
MRPL15_MRPS35	MRPL15	MRPS35	0.12204	0.214897	0.743666	0	BRCA_chr8	1	3	2	77	0.333333	Non-promiscuous	Non-aggregation prone
MRPL15_MRPS36	MRPL15	MRPS36	-0.259838	0.00743244	0.0323865	0.74293	BRCA_chr8	1	3	2	77	0.333333	Non-promiscuous	Non-aggregation prone
MRPL15_MRPS5	MRPL15	MRPS5	0.388876	4.13738e-05	-0.048165	0.625606	BRCA_chr8	1	3	2	77	0.333333	Non-promiscuous	Non-aggregation prone
MRPL15_MRPS6	MRPL15	MRPS6	0.21694	0.0262223	0.0496475	0.614995	BRCA_chr8	1	3	2	77	0.333333	Non-promiscuous	Non-aggregation prone
MRPL15_MRPS7	MRPL15	MRPS7	0.201223	0.0395568	0.746475	0	BRCA_chr8	1	3	2	77	0.333333	Non-promiscuous	Non-aggregation prone
MRPL15_MRPS9	MRPL15	MRPS9	0.198704	0.0421488	0.70368	0	BRCA_chr8	1	3	2	77	0.333333	Non-promiscuous	Non-aggregation prone
MRPS26_DAP3	MRPS26	DAP3	-0.067856	0.529893	0.240898	0.0237645	COREAD_chr20	2	2	2	77	1	Non-promiscuous	Non-aggregation prone
MRPS26_LACTB	MRPS26	LACTB	-0.0108837	0.919835	-0.137743	0.200622	COREAD_chr20	1	3	2	77	0.333333	Non-promiscuous	Non-aggregation prone
MRPS26_MRPL1	MRPS26	MRPL1	-0.122116	0.257038	0.183484	0.0870476	COREAD_chr20	1	3	2	77	0.333333	Non-promiscuous	Non-aggregation prone
MRPS26_MRPL10	MRPS26	MRPL10	0.321405	0.00226277	0.100074	0.353573	COREAD_chr20	1	3	2	77	0.333333	Non-promiscuous	Non-aggregation prone
MRPS26_MRPL11	MRPS26	MRPL11	0.24182	0.0232177	0.167696	0.118354	COREAD_chr20	1	3	2	77	0.333333	Non-promiscuous	Non-aggregation prone
MRPS26_MRPL13	MRPS26	MRPL13	-0.0858899	0.426224	0.0603393	0.576538	COREAD_chr20	1	3	2	77	0.333333	Non-promiscuous	Non-aggregation prone
MRPS26_MRPL14	MRPS26	MRPL14	0.408298	7.8489e-05	0.110414	0.305789	COREAD_chr20	1	3	2	77	0.333333	Non-promiscuous	Non-aggregation prone
MRPS26_MRPL15	MRPS26	MRPL15	-0.0192138	0.858974	0.14575	0.175433	COREAD_chr20	1	3	2	77	0.333333	Non-promiscuous	Non-aggregation prone
MRPS26_MRPL16	MRPS26	MRPL16	0.217657	0.0416399	0.0480638	0.656545	COREAD_chr20	1	3	2	77	0.333333	Non-promiscuous	Non-aggregation prone
MRPS26_MRPL17	MRPS26	MRPL17	0.447413	1.24029e-05	0.148832	0.166381	COREAD_chr20	1	3	2	77	0.333333	Non-promiscuous	Non-aggregation prone
MRPS26_MRPL18	MRPS26	MRPL18	0.027086	0.802199	0.00563285	0.95846	COREAD_chr20	1	3	2	77	0.333333	Non-promiscuous	Non-aggregation prone
MRPS26_MRPL19	MRPS26	MRPL19	-0.156546	0.145246	0.0817104	0.449158	COREAD_chr20	1	3	2	77	0.333333	Non-promiscuous	Non-aggregation prone
MRPS26_MRPL2	MRPS26	MRPL2	0.535011	7.8766e-08	0.119703	0.26663	COREAD_chr20	1	3	2	77	0.333333	Non-promiscuous	Non-aggregation prone
MRPS26_MRPL20	MRPS26	MRPL20	0.326441	0.00190916	0.188065	0.0793151	COREAD_chr20	1	3	2	77	0.333333	Non-promiscuous	Non-aggregation prone
MRPS26_MRPL21	MRPS26	MRPL21	0.293509	0.0055135	0.074619	0.489601	COREAD_chr20	1	3	2	77	0.333333	Non-promiscuous	Non-aggregation prone
MRPS26_MRPL22	MRPS26	MRPL22	0.171269	0.110603	0.056008	0.604251	COREAD_chr20	1	3	2	77	0.333333	Non-promiscuous	Non-aggregation prone
MRPS26_MRPL23	MRPS26	MRPL23	0.291448	0.00586897	0.0134217	0.901226	COREAD_chr20	1	3	2	77	0.333333	Non-promiscuous	Non-aggregation prone
MRPS26_MRPL24	MRPS26	MRPL24	0.049646	0.645986	-0.00761923	0.943833	COREAD_chr20	1	3	2	77	0.333333	Non-promiscuous	Non-aggregation prone
MRPS26_MRPL27	MRPS26	MRPL27	0.378518	0.000276554	0.207322	0.0526034	COREAD_chr20	1	3	2	77	0.333333	Non-promiscuous	Non-aggregation prone
MRPS26_MRPL28	MRPS26	MRPL28	0.412648	6.46399e-05	0.212573	0.0467686	COREAD_chr20	1	3	2	77	0.333333	Non-promiscuous	Non-aggregation prone
MRPS26_MRPL3	MRPS26	MRPL3	0.00744954	0.945081	0.133881	0.21366	COREAD_chr20	1	3	2	77	0.333333	Non-promiscuous	Non-aggregation prone
MRPS26_MRPL30	MRPS26	MRPL30	-0.152143	0.157046	0.207846	0.0519957	COREAD_chr20	1	3	2	77	0.333333	Non-promiscuous	Non-aggregation prone
MRPS26_MRPL32	MRPS26	MRPL32	-0.115477	0.284004	0.222239	0.0374264	COREAD_chr20	1	3	2	77	0.333333	Non-promiscuous	Non-aggregation prone
MRPS26_MRPL34	MRPS26	MRPL34	0.0868761	0.420911	0.326593	0.00189935	COREAD_chr20	1	3	2	77	0.333333	Non-promiscuous	Non-aggregation prone
MRPS26_MRPL37	MRPS26	MRPL37	0.229527	0.0314624	-0.119193	0.268686	COREAD_chr20	1	3	2	77	0.333333	Non-promiscuous	Non-aggregation prone
MRPS26_MRPL38	MRPS26	MRPL38	0.481068	2.09217e-06	0.220513	0.0389696	COREAD_chr20	1	3	2	77	0.333333	Non-promiscuous	Non-aggregation prone
MRPS26_MRPL39	MRPS26	MRPL39	0.138935	0.196717	0.128033	0.234525	COREAD_chr20	1	3	2	77	0.333333	Non-promiscuous	Non-aggregation prone
MRPS26_MRPL4	MRPS26	MRPL4	0.447184	1.25461e-05	-0.0414165	0.701623	COREAD_chr20	1	3	2	77	0.333333	Non-promiscuous	Non-aggregation prone
MRPS26_MRPL40	MRPS26	MRPL40	0.268553	0.0114098	-0.0562733	0.602537	COREAD_chr20	1	3	2	77	0.333333	Non-promiscuous	Non-aggregation prone
MRPS26_MRPL41	MRPS26	MRPL41	0.397344	0.000126487	0.0953096	0.377067	COREAD_chr20	1	3	2	77	0.333333	Non-promiscuous	Non-aggregation prone
MRPS26_MRPL42	MRPS26	MRPL42	-0.110264	0.30645	0.18533	0.0838626	COREAD_chr20	1	3	2	77	0.333333	Non-promiscuous	Non-aggregation prone
MRPS26_MRPL43	MRPS26	MRPL43	0.405956	8.70418e-05	0.115471	0.28403	COREAD_chr20	1	3	2	77	0.333333	Non-promiscuous	Non-aggregation prone
MRPS26_MRPL44	MRPS26	MRPL44	-0.0332852	0.758186	0.139929	0.193502	COREAD_chr20	1	3	2	77	0.333333	Non-promiscuous	Non-aggregation prone
MRPS26_MRPL45	MRPS26	MRPL45	0.0589447	0.585397	0.0399893	0.711444	COREAD_chr20	1	3	2	77	0.333333	Non-promiscuous	Non-aggregation prone
MRPS26_MRPL46	MRPS26	MRPL46	0.0623437	0.563916	0.0515124	0.633621	COREAD_chr20	1	3	2	77	0.333333	Non-promiscuous	Non-aggregation prone
MRPS26_MRPL47	MRPS26	MRPL47	-0.0425487	0.693866	0.19533	0.0681867	COREAD_chr20	1	3	2	77	0.333333	Non-promiscuous	Non-aggregation prone
MRPS26_MRPL48	MRPS26	MRPL48	0.0439928	0.684019	0.146386	0.173536	COREAD_chr20	1	3	2	77	0.333333	Non-promiscuous	Non-aggregation prone
MRPS26_MRPL49	MRPS26	MRPL49	0.171269	0.110603	0.151773	0.158069	COREAD_chr20	1	3	2	77	0.333333	Non-promiscuous	Non-aggregation prone
MRPS26_MRPL50	MRPS26	MRPL50	-0.0549998	0.610786	0.0926147	0.390767	COREAD_chr20	1	3	2	77	0.333333	Non-promiscuous	Non-aggregation prone
MRPS26_MRPL53	MRPS26	MRPL53	-0.00401536	0.970382	-0.0472873	0.661752	COREAD_chr20	1	3	2	77	0.333333	Non-promiscuous	Non-aggregation prone
MRPS26_MRPL55	MRPS26	MRPL55	0.328079	0.00180541	0.268352	0.0114739	COREAD_chr20	1	3	2	77	0.333333	Non-promiscuous	Non-aggregation prone
MRPS26_MRPL9	MRPS26	MRPL9	-0.0143531	0.89441	0.117209	0.276792	COREAD_chr20	1	3	2	77	0.333333	Non-promiscuous	Non-aggregation prone
MRPS26_MRPS10	MRPS26	MRPS10	0.00331091	0.975577	0.179263	0.0946908	COREAD_chr20	2	2	2	77	1	Non-promiscuous	Non-aggregation prone
MRPS26_MRPS11	MRPS26	MRPS11	0.276831	0.00902752	-0.0447375	0.678961	COREAD_chr20	2	2	2	77	1	Non-promiscuous	Non-aggregation prone
MRPS26_MRPS12	MRPS26	MRPS12	0.406484	8.50403e-05	0.342679	0.00108232	COREAD_chr20	2	2	2	77	1	Non-promiscuous	Non-aggregation prone
MRPS26_MRPS14	MRPS26	MRPS14	-0.0797612	0.460086	-0.0212423	0.844263	COREAD_chr20	2	2	2	77	1	Non-promiscuous	Non-aggregation prone
MRPS26_MRPS15	MRPS26	MRPS15	0.161829	0.131981	0.251458	0.0181146	COREAD_chr20	2	2	2	77	1	Non-promiscuous	Non-aggregation prone
MRPS26_MRPS16	MRPS26	MRPS16	0.182487	0.0888064	0.0537018	0.619243	COREAD_chr20	2	2	2	77	1	Non-promiscuous	Non-aggregation prone
MRPS26_MRPS17	MRPS26	MRPS17	-0.0568666	0.598711	0.140334	0.192204	COREAD_chr20	2	2	2	77	1	Non-promiscuous	Non-aggregation prone
MRPS26_MRPS18A	MRPS26	MRPS18A	0.365274	0.000466443	0.0219226	0.839341	COREAD_chr20	2	2	2	77	1	Non-promiscuous	Non-aggregation prone
MRPS26_MRPS18B	MRPS26	MRPS18B	0.273308	0.00998192	0.182989	0.0879182	COREAD_chr20	2	2	2	77	1	Non-promiscuous	Non-aggregation prone
MRPS26_MRPS2	MRPS26	MRPS2	0.51858	2.27219e-07	0.307277	0.00359008	COREAD_chr20	2	2	2	77	1	Non-promiscuous	Non-aggregation prone
MRPS26_MRPS21	MRPS26	MRPS21	-0.0801662	0.457803	0.230463	0.0307579	COREAD_chr20	2	2	2	77	1	Non-promiscuous	Non-aggregation prone
MRPS26_MRPS22	MRPS26	MRPS22	-0.0327921	0.761661	0.11018	0.306822	COREAD_chr20	2	2	2	77	1	Non-promiscuous	Non-aggregation prone
MRPS26_MRPS23	MRPS26	MRPS23	0.0355042	0.742609	0.206379	0.0537122	COREAD_chr20	2	2	2	77	1	Non-promiscuous	Non-aggregation prone
MRPS26_MRPS24	MRPS26	MRPS24	0.440351	1.7603e-05	0.0596011	0.58122	COREAD_chr20	2	2	2	77	1	Non-promiscuous	Non-aggregation prone
MRPS26_MRPS25	MRPS26	MRPS25	0.180938	0.0915973	0.245237	0.0212834	COREAD_chr20	2	2	2	77	1	Non-promiscuous	Non-aggregation prone
MRPS26_MRPS27	MRPS26	MRPS27	0.0387799	0.719804	0.297989	0.00480575	COREAD_chr20	2	2	2	77	1	Non-promiscuous	Non-aggregation prone
MRPS26_MRPS28	MRPS26	MRPS28	0.0786693	0.46627	0.192125	0.0729302	COREAD_chr20	2	2	2	77	1	Non-promiscuous	Non-aggregation prone
MRPS26_MRPS30	MRPS26	MRPS30	-0.0451023	0.676488	0.271058	0.010637	COREAD_chr20	2	2	2	77	1	Non-promiscuous	Non-aggregation prone
MRPS26_MRPS31	MRPS26	MRPS31	-0.141735	0.187757	-0.0135495	0.900291	COREAD_chr20	2	2	2	77	1	Non-promiscuous	Non-aggregation prone
MRPS26_MRPS34	MRPS26	MRPS34	0.586048	1.99046e-09	0.272554	0.0101976	COREAD_chr20	2	2	2	77	1	Non-promiscuous	Non-aggregation prone
MRPS26_MRPS35	MRPS26	MRPS35	0.028266	0.793769	0.163423	0.128166	COREAD_chr20	2	2	2	77	1	Non-promiscuous	Non-aggregation prone
MRPS26_MRPS36	MRPS26	MRPS36	-0.126942	0.238571	-0.174272	0.104398	COREAD_chr20	2	2	2	77	1	Non-promiscuous	Non-aggregation prone
MRPS26_MRPS5	MRPS26	MRPS5	0.135571	0.207882	0.0943203	0.382062	COREAD_chr20	2	2	2	77	1	Non-promiscuous	Non-aggregation prone
MRPS26_MRPS6	MRPS26	MRPS6	-0.106601	0.322896	0.265072	0.0125653	COREAD_chr20	2	2	2	77	1	Non-promiscuous	Non-aggregation prone
MRPS26_MRPS7	MRPS26	MRPS7	0.220545	0.0389406	0.183239	0.0874772	COREAD_chr20	2	2	2	77	1	Non-promiscuous	Non-aggregation prone
MRPS26_MRPS9	MRPS26	MRPS9	-0.0274911	0.799302	-0.0310123	0.774242	COREAD_chr20	2	2	2	77	1	Non-promiscuous	Non-aggregation prone
NAP1L1_BRIX1	NAP1L1	BRIX1	-0.0107748	0.907413	-0.073095	0.42952	OV_chr12	1	1	1	104	1	Non-promiscuous	Non-aggregation prone
NAP1L1_DDX21	NAP1L1	DDX21	0.209322	0.0223302	0.129789	0.159473	OV_chr12	1	4	1	104	0.25	Non-promiscuous	Non-aggregation prone
NAP1L1_DHX9	NAP1L1	DHX9	0.343235	0.000132646	0.229796	0.011935	OV_chr12	1	9	1	104	0.111111	Non-promiscuous	Non-aggregation prone
NAP1L1_EBNA1BP2	NAP1L1	EBNA1BP2	-0.0564165	0.542246	-0.0837559	0.365138	OV_chr12	1	1	1	104	1	Non-promiscuous	Non-aggregation prone
NAP1L1_EEF1A1	NAP1L1	EEF1A1	0.35992	5.80955e-05	0.135707	0.141134	OV_chr12	1	2	1	104	0.5	Non-promiscuous	Non-aggregation prone
NAP1L1_EEF2	NAP1L1	EEF2	0.319812	0.000391869	0.0426364	0.645223	OV_chr12	1	1	1	104	1	Non-promiscuous	Non-aggregation prone
NAP1L1_FBL	NAP1L1	FBL	0.52249	1.09529e-09	-0.128201	0.164684	OV_chr12	1	4	1	104	0.25	Non-promiscuous	Non-aggregation prone
NAP1L1_GNL3	NAP1L1	GNL3	0.00648056	0.944234	0.00158809	0.986324	OV_chr12	1	1	1	104	1	Non-promiscuous	Non-aggregation prone
NAP1L1_H1FX	NAP1L1	H1FX	0.199224	0.0298437	0.0306367	0.740828	OV_chr12	1	1	1	104	1	Non-promiscuous	Non-aggregation prone
NAP1L1_HIST1H1D	NAP1L1	HIST1H1D	-0.179711	0.0505036	-0.0370175	0.689386	OV_chr12	1	2	1	104	0.5	Non-promiscuous	Non-aggregation prone
NAP1L1_HNRNPM	NAP1L1	HNRNPM	0.187103	0.041596	0.103653	0.261942	OV_chr12	1	3	1	104	0.333333	Non-promiscuous	Non-aggregation prone
NAP1L1_HNRNPU	NAP1L1	HNRNPU	0.178913	0.0515526	0.1451	0.115373	OV_chr12	1	10	1	104	0.1	Non-promiscuous	Non-aggregation prone
NAP1L1_ILF2	NAP1L1	ILF2	0.0769121	0.405754	0.156886	0.0883935	OV_chr12	1	4	1	104	0.25	Non-promiscuous	Non-aggregation prone
NAP1L1_ILF3	NAP1L1	ILF3	0.157542	0.0870554	0.139225	0.131018	OV_chr12	1	7	1	104	0.142857	Non-promiscuous	Non-aggregation prone
NAP1L1_LYAR	NAP1L1	LYAR	0.163908	0.0748762	-0.0441319	0.633666	OV_chr12	1	1	1	104	1	Non-promiscuous	Non-aggregation prone
NAP1L1_MYBBP1A	NAP1L1	MYBBP1A	0.161637	0.0790539	-0.0420026	0.650147	OV_chr12	1	3	1	104	0.333333	Non-promiscuous	Non-aggregation prone
NAP1L1_NCL	NAP1L1	NCL	0.267725	0.00324372	0.0471656	0.610493	OV_chr12	1	8	1	104	0.125	Non-promiscuous	Non-aggregation prone
NAP1L1_NOLC1	NAP1L1	NOLC1	0.297693	0.00100886	0.122839	0.183218	OV_chr12	1	1	1	104	1	Non-promiscuous	Non-aggregation prone
NAP1L1_NOP58	NAP1L1	NOP58	0.19082	0.0376381	-0.0976713	0.290625	OV_chr12	1	1	1	104	1	Non-promiscuous	Non-aggregation prone
NAP1L1_RBM28	NAP1L1	RBM28	0.0308005	0.739492	0.0799031	0.387686	OV_chr12	1	1	1	104	1	Non-promiscuous	Non-aggregation prone
NAP1L1_RPL10	NAP1L1	RPL10	0.0957342	0.300345	0.174733	0.0573491	OV_chr12	1	3	1	104	0.333333	Non-promiscuous	Non-aggregation prone
NAP1L1_RPL10A	NAP1L1	RPL10A	0.18461	0.0444401	0.183556	0.0456905	OV_chr12	1	4	1	104	0.25	Non-promiscuous	Non-aggregation prone
NAP1L1_RPL11	NAP1L1	RPL11	0.280516	0.0020012	0.168509	0.0669613	OV_chr12	1	4	1	104	0.25	Non-promiscuous	Non-aggregation prone
NAP1L1_RPL12	NAP1L1	RPL12	0.181456	0.0482703	0.191483	0.0369672	OV_chr12	1	4	1	104	0.25	Non-promiscuous	Non-aggregation prone
NAP1L1_RPL13	NAP1L1	RPL13	0.196439	0.0322588	0.096012	0.298938	OV_chr12	1	4	1	104	0.25	Non-promiscuous	Non-aggregation prone
NAP1L1_RPL13A	NAP1L1	RPL13A	0.258567	0.00452107	0.0988321	0.284902	OV_chr12	1	4	1	104	0.25	Non-promiscuous	Non-aggregation prone
NAP1L1_RPL14	NAP1L1	RPL14	0.330259	0.000244309	0.100612	0.276272	OV_chr12	1	4	1	104	0.25	Non-promiscuous	Non-aggregation prone
NAP1L1_RPL15	NAP1L1	RPL15	0.24943	0.00622626	0.153532	0.0955024	OV_chr12	1	4	1	104	0.25	Non-promiscuous	Non-aggregation prone
NAP1L1_RPL17	NAP1L1	RPL17	0.151424	0.100196	0.163289	0.0759975	OV_chr12	1	3	1	104	0.333333	Non-promiscuous	Non-aggregation prone
NAP1L1_RPL18	NAP1L1	RPL18	0.231242	0.0113959	0.150228	0.10294	OV_chr12	1	3	1	104	0.333333	Non-promiscuous	Non-aggregation prone
NAP1L1_RPL18A	NAP1L1	RPL18A	0.0874092	0.344522	0.221899	0.0152917	OV_chr12	1	4	1	104	0.25	Non-promiscuous	Non-aggregation prone
NAP1L1_RPL19	NAP1L1	RPL19	0.333905	0.000206338	0.0998789	0.279806	OV_chr12	1	4	1	104	0.25	Non-promiscuous	Non-aggregation prone
NAP1L1_RPL21	NAP1L1	RPL21	0.0995656	0.281325	0.085109	0.357416	OV_chr12	1	4	1	104	0.25	Non-promiscuous	Non-aggregation prone
NAP1L1_RPL22	NAP1L1	RPL22	0.287196	0.00154096	0.0409343	0.65848	OV_chr12	1	3	1	104	0.333333	Non-promiscuous	Non-aggregation prone
NAP1L1_RPL23	NAP1L1	RPL23	0.367063	4.02219e-05	0.202172	0.0274555	OV_chr12	1	3	1	104	0.333333	Non-promiscuous	Non-aggregation prone
NAP1L1_RPL23A	NAP1L1	RPL23A	0.171756	0.0617946	0.185465	0.0434473	OV_chr12	1	3	1	104	0.333333	Non-promiscuous	Non-aggregation prone
NAP1L1_RPL24	NAP1L1	RPL24	0.179041	0.0513828	0.123309	0.181535	OV_chr12	1	3	1	104	0.333333	Non-promiscuous	Non-aggregation prone
NAP1L1_RPL26	NAP1L1	RPL26	0.229832	0.0119214	0.141233	0.125497	OV_chr12	1	4	1	104	0.25	Non-promiscuous	Non-aggregation prone
NAP1L1_RPL27	NAP1L1	RPL27	0.0155391	0.866794	0.146724	0.111316	OV_chr12	1	4	1	104	0.25	Non-promiscuous	Non-aggregation prone
NAP1L1_RPL27A	NAP1L1	RPL27A	0.190222	0.0382528	0.141376	0.125112	OV_chr12	1	3	1	104	0.333333	Non-promiscuous	Non-aggregation prone
NAP1L1_RPL28	NAP1L1	RPL28	0.050762	0.583516	0.0922376	0.318424	OV_chr12	1	4	1	104	0.25	Non-promiscuous	Non-aggregation prone
NAP1L1_RPL29	NAP1L1	RPL29	0.195314	0.0332806	0.0295043	0.750086	OV_chr12	1	3	1	104	0.333333	Non-promiscuous	Non-aggregation prone
NAP1L1_RPL3	NAP1L1	RPL3	0.388684	1.25207e-05	0.151082	0.100974	OV_chr12	1	3	1	104	0.333333	Non-promiscuous	Non-aggregation prone
NAP1L1_RPL30	NAP1L1	RPL30	0.1953	0.0332937	0.153276	0.0960639	OV_chr12	1	6	1	104	0.166667	Non-promiscuous	Non-aggregation prone
NAP1L1_RPL31	NAP1L1	RPL31	0.350555	9.28619e-05	0.131142	0.155131	OV_chr12	1	3	1	104	0.333333	Non-promiscuous	Non-aggregation prone
NAP1L1_RPL32	NAP1L1	RPL32	0.220852	0.0157931	0.0884703	0.338674	OV_chr12	1	4	1	104	0.25	Non-promiscuous	Non-aggregation prone
NAP1L1_RPL35	NAP1L1	RPL35	0.0347742	0.707324	0.168658	0.0667159	OV_chr12	1	3	1	104	0.333333	Non-promiscuous	Non-aggregation prone
NAP1L1_RPL35A	NAP1L1	RPL35A	0.269712	0.00301372	0.106388	0.249495	OV_chr12	1	4	1	104	0.25	Non-promiscuous	Non-aggregation prone
NAP1L1_RPL36	NAP1L1	RPL36	0.0860775	0.351951	0.153967	0.0945571	OV_chr12	1	4	1	104	0.25	Non-promiscuous	Non-aggregation prone
NAP1L1_RPL36A	NAP1L1	RPL36A	0.184959	0.0440324	0.135088	0.142975	OV_chr12	1	3	1	104	0.333333	Non-promiscuous	Non-aggregation prone
NAP1L1_RPL37A	NAP1L1	RPL37A	0.24775	0.00659583	0.0814912	0.378292	OV_chr12	1	4	1	104	0.25	Non-promiscuous	Non-aggregation prone
NAP1L1_RPL39	NAP1L1	RPL39	0.129996	0.158804	0.350374	0.00221073	OV_chr12	1	3	1	104	0.333333	Non-promiscuous	Non-aggregation prone
NAP1L1_RPL4	NAP1L1	RPL4	0.464791	1.00872e-07	0.15762	0.0868965	OV_chr12	1	4	1	104	0.25	Non-promiscuous	Non-aggregation prone
NAP1L1_RPL5	NAP1L1	RPL5	0.397137	7.75432e-06	0.215019	0.0188562	OV_chr12	1	3	1	104	0.333333	Non-promiscuous	Non-aggregation prone
NAP1L1_RPL7	NAP1L1	RPL7	0.380444	1.97251e-05	0.189289	0.0392282	OV_chr12	1	4	1	104	0.25	Non-promiscuous	Non-aggregation prone
NAP1L1_RPL7A	NAP1L1	RPL7A	0.238428	0.00902102	0.216572	0.0179945	OV_chr12	1	5	1	104	0.2	Non-promiscuous	Non-aggregation prone
NAP1L1_RPL8	NAP1L1	RPL8	-0.0506623	0.584256	0.139546	0.130124	OV_chr12	1	4	1	104	0.25	Non-promiscuous	Non-aggregation prone
NAP1L1_RPL9	NAP1L1	RPL9	0.171486	0.0622123	0.196311	0.0323739	OV_chr12	1	3	1	104	0.333333	Non-promiscuous	Non-aggregation prone
NAP1L1_RPLP1	NAP1L1	RPLP1	0.182965	0.0464045	0.231078	0.0114559	OV_chr12	1	4	1	104	0.25	Non-promiscuous	Non-aggregation prone
NAP1L1_RPLP2	NAP1L1	RPLP2	0.24013	0.00852694	0.129447	0.160584	OV_chr12	1	4	1	104	0.25	Non-promiscuous	Non-aggregation prone
NAP1L1_RPS11	NAP1L1	RPS11	0.205989	0.0246069	0.0749822	0.417672	OV_chr12	1	5	1	104	0.2	Non-promiscuous	Non-aggregation prone
NAP1L1_RPS12	NAP1L1	RPS12	0.309628	0.000611183	0.179917	0.0502348	OV_chr12	1	4	1	104	0.25	Non-promiscuous	Non-aggregation prone
NAP1L1_RPS13	NAP1L1	RPS13	0.198526	0.0304341	0.163652	0.0753385	OV_chr12	1	6	1	104	0.166667	Non-promiscuous	Non-aggregation prone
NAP1L1_RPS14	NAP1L1	RPS14	0.24817	0.00650165	0.290158	0.00136953	OV_chr12	1	4	1	104	0.25	Non-promiscuous	Non-aggregation prone
NAP1L1_RPS15	NAP1L1	RPS15	0.132752	0.150082	0.135114	0.146375	OV_chr12	1	4	1	104	0.25	Non-promiscuous	Non-aggregation prone
NAP1L1_RPS15A	NAP1L1	RPS15A	0.183407	0.0458703	0.186804	0.0419291	OV_chr12	1	4	1	104	0.25	Non-promiscuous	Non-aggregation prone
NAP1L1_RPS16	NAP1L1	RPS16	0.281199	0.00194895	0.0378792	0.682541	OV_chr12	1	4	1	104	0.25	Non-promiscuous	Non-aggregation prone
NAP1L1_RPS17	NAP1L1	RPS17	0.221735	0.0153693	0.207065	0.0238516	OV_chr12	1	4	1	104	0.25	Non-promiscuous	Non-aggregation prone
NAP1L1_RPS18	NAP1L1	RPS18	0.19087	0.0375872	0.151695	0.0995838	OV_chr12	1	4	1	104	0.25	Non-promiscuous	Non-aggregation prone
NAP1L1_RPS2	NAP1L1	RPS2	0.51425	2.20203e-09	0.219399	0.0165126	OV_chr12	1	4	1	104	0.25	Non-promiscuous	Non-aggregation prone
NAP1L1_RPS23	NAP1L1	RPS23	0.409073	3.85365e-06	0.188307	0.0402782	OV_chr12	1	4	1	104	0.25	Non-promiscuous	Non-aggregation prone
NAP1L1_RPS24	NAP1L1	RPS24	0.294552	0.00114708	0.206993	0.023901	OV_chr12	1	4	1	104	0.25	Non-promiscuous	Non-aggregation prone
NAP1L1_RPS29	NAP1L1	RPS29	0.10178	0.270707	0.114418	0.219308	OV_chr12	1	4	1	104	0.25	Non-promiscuous	Non-aggregation prone
NAP1L1_RPS3A	NAP1L1	RPS3A	0.161024	0.0802116	0.18429	0.0448172	OV_chr12	1	4	1	104	0.25	Non-promiscuous	Non-aggregation prone
NAP1L1_RPS6	NAP1L1	RPS6	0.236669	0.00955799	0.175338	0.056478	OV_chr12	1	5	1	104	0.2	Non-promiscuous	Non-aggregation prone
NAP1L1_RPS7	NAP1L1	RPS7	0.259301	0.00440427	0.171322	0.0624663	OV_chr12	1	4	1	104	0.25	Non-promiscuous	Non-aggregation prone
NAP1L1_RPS8	NAP1L1	RPS8	0.192665	0.0357948	0.193092	0.0353788	OV_chr12	1	4	1	104	0.25	Non-promiscuous	Non-aggregation prone
NAP1L1_RPS9	NAP1L1	RPS9	0.271194	0.00285193	0.273116	0.0026536	OV_chr12	1	4	1	104	0.25	Non-promiscuous	Non-aggregation prone
NAP1L1_RSL1D1	NAP1L1	RSL1D1	0.219605	0.0164086	-0.0789346	0.393483	OV_chr12	1	1	1	104	1	Non-promiscuous	Non-aggregation prone
NAP1L1_SLC25A5	NAP1L1	SLC25A5	-0.0799103	0.387643	-0.140949	0.126269	OV_chr12	1	4	1	104	0.25	Non-promiscuous	Non-aggregation prone
NAP1L1_SNU13	NAP1L1	SNU13	-0.0137943	0.881635	-0.10814	0.241739	OV_chr12	1	2	1	104	0.5	Non-promiscuous	Non-aggregation prone
NAP1L1_SRP14	NAP1L1	SRP14	0.197878	0.0309912	0.165133	0.0726986	OV_chr12	1	1	1	104	1	Non-promiscuous	Non-aggregation prone
NAP1L1_SRPK1	NAP1L1	SRPK1	0.104757	0.256867	0.133075	0.171797	OV_chr12	1	3	1	104	0.333333	Non-promiscuous	Non-aggregation prone
NAP1L1_TCOF1	NAP1L1	TCOF1	0.212441	0.0203657	-0.200499	0.0287903	OV_chr12	1	1	1	104	1	Non-promiscuous	Non-aggregation prone
NAP1L1_TOP1	NAP1L1	TOP1	0.235771	0.00984259	0.209778	0.0220334	OV_chr12	1	8	1	104	0.125	Non-promiscuous	Non-aggregation prone
NAP1L1_TUBB1	NAP1L1	TUBB1	0.0204244	0.825501	0.162555	0.0773425	OV_chr12	1	2	1	104	0.5	Non-promiscuous	Non-aggregation prone
NAP1L1_TUFM	NAP1L1	TUFM	0.0279732	0.76266	-0.278792	0.0021386	OV_chr12	1	1	1	104	1	Non-promiscuous	Non-aggregation prone
NAP1L1_U2AF1	NAP1L1	U2AF1	0.168943	0.0662504	0.182802	0.046604	OV_chr12	1	5	1	104	0.2	Non-promiscuous	Non-aggregation prone
NAP1L1_U2AF2	NAP1L1	U2AF2	0.10824	0.241303	0.203155	0.0266965	OV_chr12	1	4	1	104	0.25	Non-promiscuous	Non-aggregation prone
NAP1L1_YBX1	NAP1L1	YBX1	0.0665147	0.472309	0.259885	0.00431322	OV_chr12	1	6	1	104	0.166667	Non-promiscuous	Non-aggregation prone
NAPB_STX12	NAPB	STX12	0.0671486	0.468089	0.114987	0.217007	OV_chr20	1	3	1	4	0.333333	Non-promiscuous	Non-aggregation prone
NCOA2_CHUK	NCOA2	CHUK	0.550467	1.17691e-09	0.0394464	0.689508	BRCA_chr8	1	23	2	7	0.0434783	Non-promiscuous	Non-aggregation prone
NCOA2_CREBBP	NCOA2	CREBBP	0.652384	4.70735e-14	0.412617	1.22005e-05	BRCA_chr8	2	22	2	7	0.0909091	Non-promiscuous	Non-aggregation prone
NCOA2_IKBKG	NCOA2	IKBKG	0.303991	0.00161791	-0.0364814	0.711776	BRCA_chr8	1	21	2	7	0.047619	Non-promiscuous	Non-aggregation prone
NCOA2_NCOA1	NCOA2	NCOA1	0.465706	5.55402e-07	-0.0331329	0.737218	BRCA_chr8	1	9	2	7	0.111111	Non-promiscuous	Non-aggregation prone
NCOA2_NCOA3	NCOA2	NCOA3	0.581961	7.46561e-11	0.33954	0.000394888	BRCA_chr8	1	7	2	7	0.142857	Non-promiscuous	Non-aggregation prone
NDUFA2_NDUFA1	NDUFA2	NDUFA1	0.346817	0.000289576	0.498974	6.03807e-08	BRCA_chr5	1	7	5	43	0.142857	Non-promiscuous	Non-aggregation prone
NDUFA2_NDUFA10	NDUFA2	NDUFA10	0.264296	0.00644119	0.602478	1.05063e-11	BRCA_chr5	1	7	5	43	0.142857	Non-promiscuous	Non-aggregation prone
NDUFA2_NDUFA11	NDUFA2	NDUFA11	0.155204	0.113894	0.514524	1.96831e-08	BRCA_chr5	2	5	5	43	0.4	Non-promiscuous	Non-aggregation prone
NDUFA2_NDUFA12	NDUFA2	NDUFA12	0.509818	2.77975e-08	0.542971	2.1768e-09	BRCA_chr5	2	5	5	43	0.4	Non-promiscuous	Non-aggregation prone
NDUFA2_NDUFA13	NDUFA2	NDUFA13	0.346672	0.000291395	0.551524	1.07779e-09	BRCA_chr5	2	5	5	43	0.4	Non-promiscuous	Non-aggregation prone
NDUFA2_NDUFA3	NDUFA2	NDUFA3	0.444962	1.97685e-06	0.472693	3.55277e-07	BRCA_chr5	1	6	5	43	0.166667	Non-promiscuous	Non-aggregation prone
NDUFA2_NDUFA4	NDUFA2	NDUFA4	0.209185	0.0322253	-0.0639851	0.516682	BRCA_chr5	1	6	5	43	0.166667	Non-promiscuous	Non-aggregation prone
NDUFA2_NDUFA5	NDUFA2	NDUFA5	0.441603	2.40927e-06	0.545563	1.76283e-09	BRCA_chr5	2	5	5	43	0.4	Non-promiscuous	Non-aggregation prone
NDUFA2_NDUFA6	NDUFA2	NDUFA6	0.0502799	0.610492	0.363736	0.000136692	BRCA_chr5	3	7	5	43	0.428571	Non-promiscuous	Non-aggregation prone
NDUFA2_NDUFA7	NDUFA2	NDUFA7	0.336772	0.000443463	-0.13898	0.157378	BRCA_chr5	2	5	5	43	0.4	Non-promiscuous	Non-aggregation prone
NDUFA2_NDUFA8	NDUFA2	NDUFA8	0.35085	0.000243052	0.273108	0.00482002	BRCA_chr5	1	6	5	43	0.166667	Non-promiscuous	Non-aggregation prone
NDUFA2_NDUFA9	NDUFA2	NDUFA9	0.00505909	0.95915	0.297906	0.00202539	BRCA_chr5	4	10	5	43	0.4	Non-promiscuous	Non-aggregation prone
NDUFA2_NDUFAB1	NDUFA2	NDUFAB1	0.322102	0.000805699	0.364296	0.000133243	BRCA_chr5	1	6	5	43	0.166667	Non-promiscuous	Non-aggregation prone
NDUFA2_NDUFB1	NDUFA2	NDUFB1	0.527089	7.63084e-09	0.241012	0.0132604	BRCA_chr5	1	6	5	43	0.166667	Non-promiscuous	Non-aggregation prone
NDUFA2_NDUFB10	NDUFA2	NDUFB10	0.534678	4.22472e-09	-0.0261559	0.791121	BRCA_chr5	1	6	5	43	0.166667	Non-promiscuous	Non-aggregation prone
NDUFA2_NDUFB11	NDUFA2	NDUFB11	0.289716	0.00271992	-0.171854	0.0796085	BRCA_chr5	1	6	5	43	0.166667	Non-promiscuous	Non-aggregation prone
NDUFA2_NDUFB2	NDUFA2	NDUFB2	0.331505	0.000551359	-0.334348	0.000718664	BRCA_chr5	1	6	5	43	0.166667	Non-promiscuous	Non-aggregation prone
NDUFA2_NDUFB3	NDUFA2	NDUFB3	0.161652	0.0994612	-0.165395	0.0917687	BRCA_chr5	1	6	5	43	0.166667	Non-promiscuous	Non-aggregation prone
NDUFA2_NDUFB4	NDUFA2	NDUFB4	0.465177	5.7427e-07	0.566515	2.9937e-10	BRCA_chr5	1	6	5	43	0.166667	Non-promiscuous	Non-aggregation prone
NDUFA2_NDUFB5	NDUFA2	NDUFB5	0.231236	0.0176271	-0.240079	0.0136319	BRCA_chr5	1	6	5	43	0.166667	Non-promiscuous	Non-aggregation prone
NDUFA2_NDUFB6	NDUFA2	NDUFB6	0.25536	0.00856173	-0.304209	0.00160482	BRCA_chr5	2	7	5	43	0.285714	Non-promiscuous	Non-aggregation prone
NDUFA2_NDUFB7	NDUFA2	NDUFB7	0.178043	0.0692013	-0.0648766	0.510845	BRCA_chr5	1	6	5	43	0.166667	Non-promiscuous	Non-aggregation prone
NDUFA2_NDUFB8	NDUFA2	NDUFB8	0.388099	4.29951e-05	0.0352167	0.721351	BRCA_chr5	1	7	5	43	0.142857	Non-promiscuous	Non-aggregation prone
NDUFA2_NDUFB9	NDUFA2	NDUFB9	0.0376218	0.703182	0.36555	0.000125804	BRCA_chr5	1	6	5	43	0.166667	Non-promiscuous	Non-aggregation prone
NDUFA2_NDUFC1	NDUFA2	NDUFC1	0.45707	9.51816e-07	0.0632753	0.553526	BRCA_chr5	1	6	5	43	0.166667	Non-promiscuous	Non-aggregation prone
NDUFA2_NDUFC2	NDUFA2	NDUFC2	0.364234	0.000133622	-0.295459	0.00221385	BRCA_chr5	1	6	5	43	0.166667	Non-promiscuous	Non-aggregation prone
NDUFA2_NDUFS1	NDUFA2	NDUFS1	-0.0414576	0.674552	0.654095	3.86358e-14	BRCA_chr5	2	6	5	43	0.333333	Non-promiscuous	Non-aggregation prone
NDUFA2_NDUFS2	NDUFA2	NDUFS2	0.151856	0.122005	0.439861	2.66731e-06	BRCA_chr5	5	8	5	43	0.625	Non-promiscuous	Non-aggregation prone
NDUFA2_NDUFS3	NDUFA2	NDUFS3	0.265934	0.00610754	0.525451	8.6531e-09	BRCA_chr5	5	10	5	43	0.5	Non-promiscuous	Non-aggregation prone
NDUFA2_NDUFS5	NDUFA2	NDUFS5	-0.0589571	0.550228	0.415779	1.02956e-05	BRCA_chr5	3	6	5	43	0.5	Non-promiscuous	Non-aggregation prone
NDUFA2_NDUFS7	NDUFA2	NDUFS7	0.486108	1.46467e-07	-0.0611445	0.535505	BRCA_chr5	4	8	5	43	0.5	Non-promiscuous	Non-aggregation prone
NDUFA2_NDUFS8	NDUFA2	NDUFS8	0.342785	0.000344203	0.525544	8.5915e-09	BRCA_chr5	2	5	5	43	0.4	Non-promiscuous	Non-aggregation prone
NDUFA2_NDUFV1	NDUFA2	NDUFV1	-0.0289135	0.769682	0.62374	1.18128e-12	BRCA_chr5	2	6	5	43	0.333333	Non-promiscuous	Non-aggregation prone
NDUFA2_NDUFV2	NDUFA2	NDUFV2	0.335289	0.000471683	0.630344	5.79092e-13	BRCA_chr5	4	7	5	43	0.571429	Non-promiscuous	Non-aggregation prone
NDUFA2_NDUFV3	NDUFA2	NDUFV3	0.263384	0.00663394	-0.125492	0.202107	BRCA_chr5	2	6	5	43	0.333333	Non-promiscuous	Non-aggregation prone
NDUFS4_NDUFA1	NDUFS4	NDUFA1	0.111227	0.258641	0.133745	0.17377	BRCA_chr5	1	8	6	43	0.125	Promiscuous	Non-aggregation prone
NDUFS4_NDUFA10	NDUFS4	NDUFA10	0.362129	0.00014706	0.308128	0.00138502	BRCA_chr5	2	7	6	43	0.285714	Promiscuous	Non-aggregation prone
NDUFS4_NDUFA11	NDUFS4	NDUFA11	-0.0527473	0.593064	0.0936969	0.341753	BRCA_chr5	2	6	6	43	0.333333	Promiscuous	Non-aggregation prone
NDUFS4_NDUFA12	NDUFS4	NDUFA12	0.385289	4.9362e-05	0.372403	9.15354e-05	BRCA_chr5	2	6	6	43	0.333333	Promiscuous	Non-aggregation prone
NDUFS4_NDUFA13	NDUFS4	NDUFA13	0.117582	0.232248	0.135372	0.168545	BRCA_chr5	2	6	6	43	0.333333	Promiscuous	Non-aggregation prone
NDUFS4_NDUFA3	NDUFS4	NDUFA3	0.0631142	0.522416	0.228426	0.0190919	BRCA_chr5	1	7	6	43	0.142857	Promiscuous	Non-aggregation prone
NDUFS4_NDUFA4	NDUFS4	NDUFA4	0.183568	0.060867	0.260284	0.00732759	BRCA_chr5	1	7	6	43	0.142857	Promiscuous	Non-aggregation prone
NDUFS4_NDUFA5	NDUFS4	NDUFA5	0.41216	1.25012e-05	0.128395	0.191784	BRCA_chr5	2	6	6	43	0.333333	Promiscuous	Non-aggregation prone
NDUFS4_NDUFA6	NDUFS4	NDUFA6	0.0687954	0.485596	0.418059	9.09927e-06	BRCA_chr5	3	8	6	43	0.375	Promiscuous	Non-aggregation prone
NDUFS4_NDUFA7	NDUFS4	NDUFA7	0.213892	0.0284573	0.482729	1.83756e-07	BRCA_chr5	2	6	6	43	0.333333	Promiscuous	Non-aggregation prone
NDUFS4_NDUFA8	NDUFS4	NDUFA8	0.275399	0.00446318	0.494008	8.53717e-08	BRCA_chr5	1	7	6	43	0.142857	Promiscuous	Non-aggregation prone
NDUFS4_NDUFA9	NDUFS4	NDUFA9	0.0666079	0.499607	0.332552	0.000528158	BRCA_chr5	4	11	6	43	0.363636	Promiscuous	Non-aggregation prone
NDUFS4_NDUFAB1	NDUFS4	NDUFAB1	0.513819	2.07345e-08	0.0074746	0.939677	BRCA_chr5	1	7	6	43	0.142857	Promiscuous	Non-aggregation prone
NDUFS4_NDUFB1	NDUFS4	NDUFB1	0.283589	0.0033725	0.0751503	0.446107	BRCA_chr5	1	7	6	43	0.142857	Promiscuous	Non-aggregation prone
NDUFS4_NDUFB10	NDUFS4	NDUFB10	0.441333	2.4476e-06	0.371781	9.42439e-05	BRCA_chr5	1	7	6	43	0.142857	Promiscuous	Non-aggregation prone
NDUFS4_NDUFB11	NDUFS4	NDUFB11	0.0775555	0.431645	0.305702	0.00151761	BRCA_chr5	1	7	6	43	0.142857	Promiscuous	Non-aggregation prone
NDUFS4_NDUFB2	NDUFS4	NDUFB2	0.206479	0.0345763	0.299926	0.00256064	BRCA_chr5	1	7	6	43	0.142857	Promiscuous	Non-aggregation prone
NDUFS4_NDUFB3	NDUFS4	NDUFB3	0.262171	0.00689812	0.293448	0.00238047	BRCA_chr5	1	7	6	43	0.142857	Promiscuous	Non-aggregation prone
NDUFS4_NDUFB4	NDUFS4	NDUFB4	0.275555	0.00443983	0.372196	9.24301e-05	BRCA_chr5	1	7	6	43	0.142857	Promiscuous	Non-aggregation prone
NDUFS4_NDUFB5	NDUFS4	NDUFB5	0.389602	3.99122e-05	0.216546	0.0265025	BRCA_chr5	1	7	6	43	0.142857	Promiscuous	Non-aggregation prone
NDUFS4_NDUFB6	NDUFS4	NDUFB6	0.237373	0.0147611	0.313684	0.00112009	BRCA_chr5	2	8	6	43	0.25	Promiscuous	Non-aggregation prone
NDUFS4_NDUFB7	NDUFS4	NDUFB7	-0.0422559	0.66865	0.379795	6.44349e-05	BRCA_chr5	1	7	6	43	0.142857	Promiscuous	Non-aggregation prone
NDUFS4_NDUFB8	NDUFS4	NDUFB8	0.12457	0.205471	0.133931	0.173165	BRCA_chr5	2	7	6	43	0.285714	Promiscuous	Non-aggregation prone
NDUFS4_NDUFB9	NDUFS4	NDUFB9	0.0545718	0.580323	0.163394	0.0958205	BRCA_chr5	1	7	6	43	0.142857	Promiscuous	Non-aggregation prone
NDUFS4_NDUFC1	NDUFS4	NDUFC1	0.380282	6.29421e-05	0.462452	4.45761e-06	BRCA_chr5	1	7	6	43	0.142857	Promiscuous	Non-aggregation prone
NDUFS4_NDUFC2	NDUFS4	NDUFC2	0.309704	0.00130463	0.328281	0.000628801	BRCA_chr5	1	7	6	43	0.142857	Promiscuous	Non-aggregation prone
NDUFS4_NDUFS1	NDUFS4	NDUFS1	0.259164	0.00759347	0.171252	0.080683	BRCA_chr5	3	6	6	43	0.5	Promiscuous	Non-aggregation prone
NDUFS4_NDUFS2	NDUFS4	NDUFS2	0.336844	0.000442122	0.0245179	0.80393	BRCA_chr5	5	9	6	43	0.555556	Promiscuous	Non-aggregation prone
NDUFS4_NDUFS3	NDUFS4	NDUFS3	0.148393	0.130852	0.0537529	0.586026	BRCA_chr5	4	12	6	43	0.333333	Promiscuous	Non-aggregation prone
NDUFS4_NDUFS5	NDUFS4	NDUFS5	-0.172828	0.0778913	0.397678	2.65951e-05	BRCA_chr5	3	7	6	43	0.428571	Promiscuous	Non-aggregation prone
NDUFS4_NDUFS7	NDUFS4	NDUFS7	0.340411	0.000380651	0.45225	1.27757e-06	BRCA_chr5	6	7	6	43	0.857143	Promiscuous	Non-aggregation prone
NDUFS4_NDUFS8	NDUFS4	NDUFS8	0.17796	0.0693331	0.172403	0.0786366	BRCA_chr5	2	6	6	43	0.333333	Promiscuous	Non-aggregation prone
NDUFS4_NDUFV1	NDUFS4	NDUFV1	0.0871346	0.376773	0.300943	0.00181165	BRCA_chr5	3	6	6	43	0.5	Promiscuous	Non-aggregation prone
NDUFS4_NDUFV2	NDUFS4	NDUFV2	0.278561	0.00400946	0.104033	0.29091	BRCA_chr5	6	6	6	43	1	Promiscuous	Non-aggregation prone
NDUFS4_NDUFV3	NDUFS4	NDUFV3	0.31695	0.000986813	0.491209	1.03527e-07	BRCA_chr5	3	6	6	43	0.5	Promiscuous	Non-aggregation prone
NELFCD_NELFA	NELFCD	NELFA	0.329341	0.000254847	0.724313	0	OV_chr20	2	2	2	3	1	Non-promiscuous	Non-aggregation prone
NELFCD_NELFB	NELFCD	NELFB	0.362477	5.09826e-05	0.774291	0	OV_chr20	2	2	2	3	1	Non-promiscuous	Non-aggregation prone
NELFCD_NELFE	NELFCD	NELFE	0.2668	0.00335618	0.651047	1.11022e-15	OV_chr20	2	2	2	3	1	Non-promiscuous	Non-aggregation prone
NOP56_ACTA2	NOP56	ACTA2	-0.0514776	0.633851	-0.127821	0.235308	COREAD_chr20	1	2	1	104	0.5	Non-promiscuous	Non-aggregation prone
NOP56_ACTG2	NOP56	ACTG2	-0.0493642	0.647862	-0.116612	0.279265	COREAD_chr20	1	1	1	104	1	Non-promiscuous	Non-aggregation prone
NOP56_BRIX1	NOP56	BRIX1	0.369466	0.000396271	0.102081	0.34395	COREAD_chr20	1	1	1	104	1	Non-promiscuous	Non-aggregation prone
NOP56_DDX21	NOP56	DDX21	0.357913	0.000617815	0.34727	0.000916735	COREAD_chr20	1	4	1	104	0.25	Non-promiscuous	Non-aggregation prone
NOP56_DHX9	NOP56	DHX9	0.459635	6.64117e-06	0.468718	4.10947e-06	COREAD_chr20	1	9	1	104	0.111111	Non-promiscuous	Non-aggregation prone
NOP56_EBNA1BP2	NOP56	EBNA1BP2	0.447395	1.24139e-05	0.281934	0.00778676	COREAD_chr20	1	1	1	104	1	Non-promiscuous	Non-aggregation prone
NOP56_EEF1A1	NOP56	EEF1A1	0.174386	0.104168	0.139588	0.194601	COREAD_chr20	1	2	1	104	0.5	Non-promiscuous	Non-aggregation prone
NOP56_EEF2	NOP56	EEF2	0.143584	0.182005	0.233274	0.0287217	COREAD_chr20	1	1	1	104	1	Non-promiscuous	Non-aggregation prone
NOP56_FBL	NOP56	FBL	0.362087	0.000527241	0.580098	3.15825e-09	COREAD_chr20	1	4	1	104	0.25	Non-promiscuous	Non-aggregation prone
NOP56_GNL3	NOP56	GNL3	0.399035	0.000117632	0.241643	0.0233217	COREAD_chr20	1	1	1	104	1	Non-promiscuous	Non-aggregation prone
NOP56_H1FX	NOP56	H1FX	0.0689303	0.523384	-0.0611496	0.571419	COREAD_chr20	1	1	1	104	1	Non-promiscuous	Non-aggregation prone
NOP56_HIST1H1D	NOP56	HIST1H1D	0.20338	0.0573664	0.208012	0.0518045	COREAD_chr20	1	2	1	104	0.5	Non-promiscuous	Non-aggregation prone
NOP56_HNRNPA1	NOP56	HNRNPA1	0.507238	4.57274e-07	0.258476	0.0150355	COREAD_chr20	1	2	1	104	0.5	Non-promiscuous	Non-aggregation prone
NOP56_HNRNPM	NOP56	HNRNPM	0.437885	1.98558e-05	0.191797	0.0734298	COREAD_chr20	1	3	1	104	0.333333	Non-promiscuous	Non-aggregation prone
NOP56_HNRNPU	NOP56	HNRNPU	0.476947	2.62846e-06	0.42708	3.32937e-05	COREAD_chr20	1	10	1	104	0.1	Non-promiscuous	Non-aggregation prone
NOP56_IGF2BP1	NOP56	IGF2BP1	0.0484073	0.654247	0.00104449	0.992294	COREAD_chr20	1	2	1	104	0.5	Non-promiscuous	Non-aggregation prone
NOP56_ILF2	NOP56	ILF2	0.291325	0.00589086	0.359442	0.000583092	COREAD_chr20	1	4	1	104	0.25	Non-promiscuous	Non-aggregation prone
NOP56_ILF3	NOP56	ILF3	0.485647	1.61793e-06	0.466706	4.57595e-06	COREAD_chr20	1	7	1	104	0.142857	Non-promiscuous	Non-aggregation prone
NOP56_LYAR	NOP56	LYAR	0.493995	1.00284e-06	0.199756	0.0620502	COREAD_chr20	1	1	1	104	1	Non-promiscuous	Non-aggregation prone
NOP56_MYBBP1A	NOP56	MYBBP1A	0.306206	0.00371457	0.367108	0.000434444	COREAD_chr20	1	3	1	104	0.333333	Non-promiscuous	Non-aggregation prone
NOP56_NAP1L1	NOP56	NAP1L1	0.416981	5.31343e-05	-0.0898756	0.404992	COREAD_chr20	1	1	1	104	1	Non-promiscuous	Non-aggregation prone
NOP56_NCL	NOP56	NCL	0.552288	2.42894e-08	0.449209	1.13322e-05	COREAD_chr20	1	8	1	104	0.125	Non-promiscuous	Non-aggregation prone
NOP56_NOLC1	NOP56	NOLC1	0.514881	2.8622e-07	0.089053	0.409322	COREAD_chr20	1	1	1	104	1	Non-promiscuous	Non-aggregation prone
NOP56_NOP58	NOP56	NOP58	0.39111	0.000164745	0.592917	1.15455e-09	COREAD_chr20	1	1	1	104	1	Non-promiscuous	Non-aggregation prone
NOP56_NPM1	NOP56	NPM1	0.380913	0.000251005	0.128724	0.231987	COREAD_chr20	1	9	1	104	0.111111	Non-promiscuous	Non-aggregation prone
NOP56_PWP1	NOP56	PWP1	0.413018	6.3574e-05	-0.0980734	0.363324	COREAD_chr20	1	1	1	104	1	Non-promiscuous	Non-aggregation prone
NOP56_RBM28	NOP56	RBM28	0.286728	0.00676067	0.291567	0.00584786	COREAD_chr20	1	1	1	104	1	Non-promiscuous	Non-aggregation prone
NOP56_RPL10	NOP56	RPL10	0.0899581	0.404559	0.143906	0.181016	COREAD_chr20	1	3	1	104	0.333333	Non-promiscuous	Non-aggregation prone
NOP56_RPL10A	NOP56	RPL10A	0.319115	0.00244217	0.0777386	0.471576	COREAD_chr20	1	4	1	104	0.25	Non-promiscuous	Non-aggregation prone
NOP56_RPL11	NOP56	RPL11	0.404512	9.27377e-05	0.017101	0.874347	COREAD_chr20	1	4	1	104	0.25	Non-promiscuous	Non-aggregation prone
NOP56_RPL12	NOP56	RPL12	0.192262	0.0727225	-0.00622584	0.954092	COREAD_chr20	1	4	1	104	0.25	Non-promiscuous	Non-aggregation prone
NOP56_RPL13	NOP56	RPL13	-0.000334613	0.997531	0.0593304	0.582941	COREAD_chr20	1	4	1	104	0.25	Non-promiscuous	Non-aggregation prone
NOP56_RPL13A	NOP56	RPL13A	0.242506	0.0228173	0.148769	0.166562	COREAD_chr20	1	4	1	104	0.25	Non-promiscuous	Non-aggregation prone
NOP56_RPL14	NOP56	RPL14	0.33921	0.00122501	-0.0734332	0.496546	COREAD_chr20	1	4	1	104	0.25	Non-promiscuous	Non-aggregation prone
NOP56_RPL15	NOP56	RPL15	0.238509	0.0252328	-0.0627248	0.56153	COREAD_chr20	1	4	1	104	0.25	Non-promiscuous	Non-aggregation prone
NOP56_RPL17	NOP56	RPL17	0.278768	0.0085375	0.0290331	0.788301	COREAD_chr20	1	3	1	104	0.333333	Non-promiscuous	Non-aggregation prone
NOP56_RPL18	NOP56	RPL18	0.219735	0.0396825	0.212973	0.0463473	COREAD_chr20	1	3	1	104	0.333333	Non-promiscuous	Non-aggregation prone
NOP56_RPL18A	NOP56	RPL18A	0.205294	0.0550118	0.123575	0.251357	COREAD_chr20	1	4	1	104	0.25	Non-promiscuous	Non-aggregation prone
NOP56_RPL19	NOP56	RPL19	0.303934	0.00399159	0.114904	0.286415	COREAD_chr20	1	4	1	104	0.25	Non-promiscuous	Non-aggregation prone
NOP56_RPL21	NOP56	RPL21	0.274048	0.00977448	-0.0360297	0.738935	COREAD_chr20	1	4	1	104	0.25	Non-promiscuous	Non-aggregation prone
NOP56_RPL22	NOP56	RPL22	0.329893	0.00169648	-0.118178	0.272814	COREAD_chr20	1	3	1	104	0.333333	Non-promiscuous	Non-aggregation prone
NOP56_RPL23	NOP56	RPL23	0.317125	0.0026084	0.00204743	0.984895	COREAD_chr20	1	3	1	104	0.333333	Non-promiscuous	Non-aggregation prone
NOP56_RPL23A	NOP56	RPL23A	0.193424	0.0709767	-0.0307595	0.776034	COREAD_chr20	1	3	1	104	0.333333	Non-promiscuous	Non-aggregation prone
NOP56_RPL24	NOP56	RPL24	0.234053	0.0281779	0.00501948	0.96298	COREAD_chr20	1	3	1	104	0.333333	Non-promiscuous	Non-aggregation prone
NOP56_RPL27	NOP56	RPL27	0.120161	0.26479	-0.163836	0.127193	COREAD_chr20	1	4	1	104	0.25	Non-promiscuous	Non-aggregation prone
NOP56_RPL27A	NOP56	RPL27A	0.407471	8.1418e-05	0.0294296	0.785479	COREAD_chr20	1	3	1	104	0.333333	Non-promiscuous	Non-aggregation prone
NOP56_RPL28	NOP56	RPL28	0.118858	0.270044	0.246622	0.0205397	COREAD_chr20	1	4	1	104	0.25	Non-promiscuous	Non-aggregation prone
NOP56_RPL29	NOP56	RPL29	0.238174	0.0254445	-0.1888	0.0781276	COREAD_chr20	1	3	1	104	0.333333	Non-promiscuous	Non-aggregation prone
NOP56_RPL3	NOP56	RPL3	0.315804	0.00272426	0.0929753	0.388917	COREAD_chr20	1	3	1	104	0.333333	Non-promiscuous	Non-aggregation prone
NOP56_RPL30	NOP56	RPL30	0.148515	0.167295	0.0481961	0.655659	COREAD_chr20	1	6	1	104	0.166667	Non-promiscuous	Non-aggregation prone
NOP56_RPL31	NOP56	RPL31	0.132859	0.217208	-0.025916	0.81058	COREAD_chr20	1	3	1	104	0.333333	Non-promiscuous	Non-aggregation prone
NOP56_RPL32	NOP56	RPL32	0.253848	0.0170101	-0.0406416	0.706949	COREAD_chr20	1	4	1	104	0.25	Non-promiscuous	Non-aggregation prone
NOP56_RPL35	NOP56	RPL35	0.302543	0.0041702	0.0168372	0.87627	COREAD_chr20	1	3	1	104	0.333333	Non-promiscuous	Non-aggregation prone
NOP56_RPL35A	NOP56	RPL35A	0.366472	0.000445314	-0.0180437	0.867481	COREAD_chr20	1	4	1	104	0.25	Non-promiscuous	Non-aggregation prone
NOP56_RPL36	NOP56	RPL36	0.107516	0.318732	-0.0652835	0.545643	COREAD_chr20	1	4	1	104	0.25	Non-promiscuous	Non-aggregation prone
NOP56_RPL36A	NOP56	RPL36A	0.060882	0.573108	-0.0386151	0.720945	COREAD_chr20	1	3	1	104	0.333333	Non-promiscuous	Non-aggregation prone
NOP56_RPL37A	NOP56	RPL37A	0.273044	0.0100569	-0.0274308	0.799733	COREAD_chr20	1	4	1	104	0.25	Non-promiscuous	Non-aggregation prone
NOP56_RPL4	NOP56	RPL4	0.32852	0.00177841	0.211038	0.0484166	COREAD_chr20	1	4	1	104	0.25	Non-promiscuous	Non-aggregation prone
NOP56_RPL5	NOP56	RPL5	0.340847	0.00115565	0.159585	0.1375	COREAD_chr20	1	3	1	104	0.333333	Non-promiscuous	Non-aggregation prone
NOP56_RPL6	NOP56	RPL6	0.424219	3.80654e-05	0.131616	0.221579	COREAD_chr20	1	5	1	104	0.2	Non-promiscuous	Non-aggregation prone
NOP56_RPL7	NOP56	RPL7	0.24462	0.0216221	0.0750535	0.487069	COREAD_chr20	1	4	1	104	0.25	Non-promiscuous	Non-aggregation prone
NOP56_RPL7A	NOP56	RPL7A	0.215614	0.0436416	0.243969	0.0219843	COREAD_chr20	1	5	1	104	0.2	Non-promiscuous	Non-aggregation prone
NOP56_RPL8	NOP56	RPL8	0.180885	0.0916937	-0.0142305	0.895307	COREAD_chr20	1	4	1	104	0.25	Non-promiscuous	Non-aggregation prone
NOP56_RPL9	NOP56	RPL9	0.211387	0.0480373	0.0746491	0.489425	COREAD_chr20	1	3	1	104	0.333333	Non-promiscuous	Non-aggregation prone
NOP56_RPLP0	NOP56	RPLP0	0.206879	0.0531224	0.237405	0.0259368	COREAD_chr20	1	3	1	104	0.333333	Non-promiscuous	Non-aggregation prone
NOP56_RPLP1	NOP56	RPLP1	0.062872	0.56061	-0.0851088	0.430458	COREAD_chr20	1	4	1	104	0.25	Non-promiscuous	Non-aggregation prone
NOP56_RPLP2	NOP56	RPLP2	0.131292	0.22273	0.112268	0.297687	COREAD_chr20	1	4	1	104	0.25	Non-promiscuous	Non-aggregation prone
NOP56_RPS11	NOP56	RPS11	0.297066	0.00494452	0.0160401	0.882084	COREAD_chr20	1	5	1	104	0.2	Non-promiscuous	Non-aggregation prone
NOP56_RPS12	NOP56	RPS12	0.233806	0.028349	0.0172468	0.873285	COREAD_chr20	1	4	1	104	0.25	Non-promiscuous	Non-aggregation prone
NOP56_RPS13	NOP56	RPS13	0.396235	0.000132628	-0.0225874	0.834538	COREAD_chr20	1	6	1	104	0.166667	Non-promiscuous	Non-aggregation prone
NOP56_RPS14	NOP56	RPS14	0.0675214	0.531929	-0.0470857	0.663106	COREAD_chr20	1	4	1	104	0.25	Non-promiscuous	Non-aggregation prone
NOP56_RPS15	NOP56	RPS15	0.0921771	0.393019	-0.0285097	0.792031	COREAD_chr20	1	4	1	104	0.25	Non-promiscuous	Non-aggregation prone
NOP56_RPS15A	NOP56	RPS15A	0.230725	0.0305634	0.0181403	0.866778	COREAD_chr20	1	4	1	104	0.25	Non-promiscuous	Non-aggregation prone
NOP56_RPS16	NOP56	RPS16	0.244567	0.0216514	0.069216	0.52166	COREAD_chr20	1	4	1	104	0.25	Non-promiscuous	Non-aggregation prone
NOP56_RPS17	NOP56	RPS17	0.322338	0.0021931	-0.0968127	0.369554	COREAD_chr20	1	4	1	104	0.25	Non-promiscuous	Non-aggregation prone
NOP56_RPS18	NOP56	RPS18	0.141066	0.189871	0.10731	0.319666	COREAD_chr20	1	4	1	104	0.25	Non-promiscuous	Non-aggregation prone
NOP56_RPS2	NOP56	RPS2	0.120742	0.262469	-0.0747195	0.489014	COREAD_chr20	1	4	1	104	0.25	Non-promiscuous	Non-aggregation prone
NOP56_RPS23	NOP56	RPS23	0.259308	0.0147025	0.152436	0.156241	COREAD_chr20	1	4	1	104	0.25	Non-promiscuous	Non-aggregation prone
NOP56_RPS24	NOP56	RPS24	0.252527	0.0176132	-0.00448221	0.96694	COREAD_chr20	1	4	1	104	0.25	Non-promiscuous	Non-aggregation prone
NOP56_RPS29	NOP56	RPS29	0.202564	0.0583948	0.0292495	0.786761	COREAD_chr20	1	4	1	104	0.25	Non-promiscuous	Non-aggregation prone
NOP56_RPS3A	NOP56	RPS3A	0.201825	0.0593401	0.0549063	0.611393	COREAD_chr20	1	4	1	104	0.25	Non-promiscuous	Non-aggregation prone
NOP56_RPS6	NOP56	RPS6	0.294354	0.00537328	0.105686	0.32709	COREAD_chr20	1	5	1	104	0.2	Non-promiscuous	Non-aggregation prone
NOP56_RPS7	NOP56	RPS7	0.130658	0.224992	0.0292104	0.787039	COREAD_chr20	1	4	1	104	0.25	Non-promiscuous	Non-aggregation prone
NOP56_RPS8	NOP56	RPS8	0.280054	0.00822535	0.187184	0.0807587	COREAD_chr20	1	4	1	104	0.25	Non-promiscuous	Non-aggregation prone
NOP56_RPS9	NOP56	RPS9	0.265383	0.0124579	0.0851279	0.430354	COREAD_chr20	1	4	1	104	0.25	Non-promiscuous	Non-aggregation prone
NOP56_RSL1D1	NOP56	RSL1D1	0.307932	0.00351574	0.363999	0.000489949	COREAD_chr20	1	1	1	104	1	Non-promiscuous	Non-aggregation prone
NOP56_SCYL2	NOP56	SCYL2	0.302543	0.0041702	-0.0648532	0.548299	COREAD_chr20	1	1	1	104	1	Non-promiscuous	Non-aggregation prone
NOP56_SLC25A5	NOP56	SLC25A5	0.0294988	0.784987	0.18092	0.0916289	COREAD_chr20	1	4	1	104	0.25	Non-promiscuous	Non-aggregation prone
NOP56_SRP14	NOP56	SRP14	0.301046	0.0043703	-0.0963728	0.371744	COREAD_chr20	1	1	1	104	1	Non-promiscuous	Non-aggregation prone
NOP56_SRPK1	NOP56	SRPK1	0.340143	0.00118504	0.32023	0.0023533	COREAD_chr20	1	3	1	104	0.333333	Non-promiscuous	Non-aggregation prone
NOP56_TCOF1	NOP56	TCOF1	0.266017	0.0122418	0.25682	0.0157178	COREAD_chr20	1	1	1	104	1	Non-promiscuous	Non-aggregation prone
NOP56_TUBA1A	NOP56	TUBA1A	-0.0280723	0.795151	0.106982	0.32116	COREAD_chr20	1	5	1	104	0.2	Non-promiscuous	Non-aggregation prone
NOP56_TUFM	NOP56	TUFM	0.310521	0.0032353	0.20054	0.0610116	COREAD_chr20	1	1	1	104	1	Non-promiscuous	Non-aggregation prone
NOP56_U2AF1	NOP56	U2AF1	0.15225	0.156753	0.14249	0.185394	COREAD_chr20	1	5	1	104	0.2	Non-promiscuous	Non-aggregation prone
NOP56_U2AF2	NOP56	U2AF2	0.267285	0.0118194	0.25605	0.0160445	COREAD_chr20	1	4	1	104	0.25	Non-promiscuous	Non-aggregation prone
NOP56_YBX1	NOP56	YBX1	0.471487	3.54017e-06	0.207611	0.0522678	COREAD_chr20	1	6	1	104	0.166667	Non-promiscuous	Non-aggregation prone
NPM1_ACTA2	NPM1	ACTA2	-0.0455318	0.644643	0.00465478	0.962412	BRCA_chr5	1	10	9	139	0.1	Promiscuous	Non-aggregation prone
NPM1_ACTB	NPM1	ACTB	0.0261974	0.790797	0.426363	5.75925e-06	BRCA_chr5	1	31	9	139	0.0322581	Promiscuous	Non-aggregation prone
NPM1_ACTG2	NPM1	ACTG2	-0.149222	0.128689	0.0238544	0.809134	BRCA_chr5	1	9	9	139	0.111111	Promiscuous	Non-aggregation prone
NPM1_CALM1	NPM1	CALM1	-0.0588638	0.55086	0.300435	0.00184591	BRCA_chr5	1	16	9	139	0.0625	Promiscuous	Non-aggregation prone
NPM1_CALR	NPM1	CALR	-0.198466	0.0424013	0.264099	0.00648238	BRCA_chr5	3	10	9	139	0.3	Promiscuous	Non-aggregation prone
NPM1_CDKN2A	NPM1	CDKN2A	-0.0526851	0.593501	0.317904	0.000950715	BRCA_chr5	1	10	9	139	0.1	Promiscuous	Non-aggregation prone
NPM1_CTCF	NPM1	CTCF	0.227213	0.0197561	-0.227473	0.0196125	BRCA_chr5	2	11	9	139	0.181818	Promiscuous	Non-aggregation prone
NPM1_DDX21	NPM1	DDX21	0.24123	0.013175	-0.0924217	0.348392	BRCA_chr5	1	12	9	139	0.0833333	Promiscuous	Non-aggregation prone
NPM1_DHX30	NPM1	DHX30	0.401286	2.2108e-05	0.0504043	0.609608	BRCA_chr5	1	10	9	139	0.1	Promiscuous	Non-aggregation prone
NPM1_DHX9	NPM1	DHX9	0.232843	0.0168338	0.360543	0.000158005	BRCA_chr5	1	17	9	139	0.0588235	Promiscuous	Non-aggregation prone
NPM1_EBNA1BP2	NPM1	EBNA1BP2	0.273668	0.00473056	-0.0184843	0.851538	BRCA_chr5	1	9	9	139	0.111111	Promiscuous	Non-aggregation prone
NPM1_EEF1A1	NPM1	EEF1A1	0.345055	0.000312382	0.449782	1.48273e-06	BRCA_chr5	1	10	9	139	0.1	Promiscuous	Non-aggregation prone
NPM1_EEF2	NPM1	EEF2	0.374425	8.3225e-05	0.144391	0.141677	BRCA_chr5	1	9	9	139	0.111111	Promiscuous	Non-aggregation prone
NPM1_EIF3L	NPM1	EIF3L	0.250715	0.0098899	0.209932	0.031601	BRCA_chr5	1	11	9	139	0.0909091	Promiscuous	Non-aggregation prone
NPM1_FBL	NPM1	FBL	0.299357	0.00192057	0.269728	0.00539288	BRCA_chr5	1	12	9	139	0.0833333	Promiscuous	Non-aggregation prone
NPM1_GNL3	NPM1	GNL3	0.389726	3.96666e-05	0.188721	0.0538519	BRCA_chr5	1	9	9	139	0.111111	Promiscuous	Non-aggregation prone
NPM1_H1FX	NPM1	H1FX	0.303048	0.00167577	-0.203815	0.0370306	BRCA_chr5	1	9	9	139	0.111111	Promiscuous	Non-aggregation prone
NPM1_H2AFX	NPM1	H2AFX	-0.141323	0.150428	0.429266	4.89419e-06	BRCA_chr5	3	11	9	139	0.272727	Promiscuous	Non-aggregation prone
NPM1_HIST1H1D	NPM1	HIST1H1D	-0.0108552	0.912485	-0.419822	8.26583e-06	BRCA_chr5	1	10	9	139	0.1	Promiscuous	Non-aggregation prone
NPM1_HIST1H2BB	NPM1	HIST1H2BB	8.4811e-05	0.999315	0.509144	2.91933e-08	BRCA_chr5	1	10	9	139	0.1	Promiscuous	Non-aggregation prone
NPM1_HIST1H4A	NPM1	HIST1H4A	0.206945	0.0341614	-0.00824176	0.933499	BRCA_chr5	2	17	9	139	0.117647	Promiscuous	Non-aggregation prone
NPM1_HNRNPA1	NPM1	HNRNPA1	0.631837	4.91607e-13	0.0256583	0.795007	BRCA_chr5	1	10	9	139	0.1	Promiscuous	Non-aggregation prone
NPM1_HNRNPM	NPM1	HNRNPM	0.230095	0.0182096	-0.0127514	0.897275	BRCA_chr5	1	11	9	139	0.0909091	Promiscuous	Non-aggregation prone
NPM1_HNRNPR	NPM1	HNRNPR	0.366494	0.000120466	0.223554	0.0218816	BRCA_chr5	1	11	9	139	0.0909091	Promiscuous	Non-aggregation prone
NPM1_HNRNPU	NPM1	HNRNPU	0.428302	5.16691e-06	0.394899	3.06178e-05	BRCA_chr5	1	18	9	139	0.0555556	Promiscuous	Non-aggregation prone
NPM1_HSPA5	NPM1	HSPA5	0.00660377	0.946694	0.113342	0.24964	BRCA_chr5	3	14	9	139	0.214286	Promiscuous	Non-aggregation prone
NPM1_HUWE1	NPM1	HUWE1	0.0515343	0.601604	-0.0301161	0.760386	BRCA_chr5	1	9	9	139	0.111111	Promiscuous	Non-aggregation prone
NPM1_IGF2BP1	NPM1	IGF2BP1	-0.0188058	0.848986	0.154893	0.11463	BRCA_chr5	1	10	9	139	0.1	Promiscuous	Non-aggregation prone
NPM1_ILF2	NPM1	ILF2	0.140048	0.154181	0.490131	1.11458e-07	BRCA_chr5	1	12	9	139	0.0833333	Promiscuous	Non-aggregation prone
NPM1_ILF3	NPM1	ILF3	0.141157	0.150912	-0.187788	0.0550705	BRCA_chr5	1	15	9	139	0.0666667	Promiscuous	Non-aggregation prone
NPM1_KPNA1	NPM1	KPNA1	0.308138	0.00138448	0.440877	2.51378e-06	BRCA_chr5	1	10	9	139	0.1	Promiscuous	Non-aggregation prone
NPM1_KPNA3	NPM1	KPNA3	0.0786025	0.425434	0.216618	0.0264507	BRCA_chr5	1	10	9	139	0.1	Promiscuous	Non-aggregation prone
NPM1_LMNA	NPM1	LMNA	-0.00309973	0.974964	-0.413135	1.1867e-05	BRCA_chr5	1	12	9	139	0.0833333	Promiscuous	Non-aggregation prone
NPM1_LUC7L2	NPM1	LUC7L2	0.211964	0.0299532	-0.31695	0.000986813	BRCA_chr5	1	9	9	139	0.111111	Promiscuous	Non-aggregation prone
NPM1_LYAR	NPM1	LYAR	0.164649	0.0932641	-0.270703	0.00522179	BRCA_chr5	1	9	9	139	0.111111	Promiscuous	Non-aggregation prone
NPM1_MYBBP1A	NPM1	MYBBP1A	0.213529	0.0287338	-0.174051	0.0757779	BRCA_chr5	1	11	9	139	0.0909091	Promiscuous	Non-aggregation prone
NPM1_MYH10	NPM1	MYH10	0.196807	0.0441929	-0.259444	0.00752621	BRCA_chr5	1	9	9	139	0.111111	Promiscuous	Non-aggregation prone
NPM1_NAP1L1	NPM1	NAP1L1	0.499264	5.91605e-08	0.48503	1.57499e-07	BRCA_chr5	1	9	9	139	0.111111	Promiscuous	Non-aggregation prone
NPM1_NCL	NPM1	NCL	0.452861	1.23105e-06	-0.163819	0.0949482	BRCA_chr5	3	14	9	139	0.214286	Promiscuous	Non-aggregation prone
NPM1_NOLC1	NPM1	NOLC1	0.383174	5.47244e-05	-0.256853	0.00816956	BRCA_chr5	1	9	9	139	0.111111	Promiscuous	Non-aggregation prone
NPM1_NONO	NPM1	NONO	0.313653	0.00112143	0.0637985	0.517908	BRCA_chr5	2	16	9	139	0.125	Promiscuous	Non-aggregation prone
NPM1_NOP58	NPM1	NOP58	0.224051	0.0215815	-0.0609579	0.536753	BRCA_chr5	1	9	9	139	0.111111	Promiscuous	Non-aggregation prone
NPM1_PABPC1	NPM1	PABPC1	0.109745	0.265082	-0.142391	0.147338	BRCA_chr5	1	14	9	139	0.0714286	Promiscuous	Non-aggregation prone
NPM1_PARP1	NPM1	PARP1	0.282863	0.00345844	0.188462	0.0541882	BRCA_chr5	4	19	9	139	0.210526	Promiscuous	Non-aggregation prone
NPM1_PTCD3	NPM1	PTCD3	0.10819	0.271954	0.349844	0.000253958	BRCA_chr5	1	9	9	139	0.111111	Promiscuous	Non-aggregation prone
NPM1_PWP1	NPM1	PWP1	0.325803	0.000694955	0.359517	0.000165485	BRCA_chr5	1	9	9	139	0.111111	Promiscuous	Non-aggregation prone
NPM1_RPL10	NPM1	RPL10	0.288285	0.00286119	-0.292411	0.00247071	BRCA_chr5	1	11	9	139	0.0909091	Promiscuous	Non-aggregation prone
NPM1_RPL10A	NPM1	RPL10A	0.469231	4.43876e-07	-0.160253	0.102465	BRCA_chr5	1	12	9	139	0.0833333	Promiscuous	Non-aggregation prone
NPM1_RPL11	NPM1	RPL11	0.348725	0.000266631	0.565436	3.28967e-10	BRCA_chr5	1	12	9	139	0.0833333	Promiscuous	Non-aggregation prone
NPM1_RPL12	NPM1	RPL12	0.455152	1.07064e-06	-0.0929919	0.345413	BRCA_chr5	1	12	9	139	0.0833333	Promiscuous	Non-aggregation prone
NPM1_RPL13	NPM1	RPL13	0.25592	0.00841277	-0.416007	1.01696e-05	BRCA_chr5	1	12	9	139	0.0833333	Promiscuous	Non-aggregation prone
NPM1_RPL13A	NPM1	RPL13A	0.282615	0.00348835	-0.368775	0.000108418	BRCA_chr5	1	12	9	139	0.0833333	Promiscuous	Non-aggregation prone
NPM1_RPL14	NPM1	RPL14	0.532926	4.84891e-09	-0.25791	0.00790144	BRCA_chr5	1	12	9	139	0.0833333	Promiscuous	Non-aggregation prone
NPM1_RPL15	NPM1	RPL15	0.473274	3.42177e-07	-0.245459	0.0116082	BRCA_chr5	1	12	9	139	0.0833333	Promiscuous	Non-aggregation prone
NPM1_RPL17	NPM1	RPL17	0.348735	0.000266511	-0.347958	0.000275649	BRCA_chr5	1	11	9	139	0.0909091	Promiscuous	Non-aggregation prone
NPM1_RPL18	NPM1	RPL18	0.26978	0.00538366	-0.300166	0.00186432	BRCA_chr5	1	11	9	139	0.0909091	Promiscuous	Non-aggregation prone
NPM1_RPL18A	NPM1	RPL18A	0.206469	0.0345856	-0.489519	1.16211e-07	BRCA_chr5	1	12	9	139	0.0833333	Promiscuous	Non-aggregation prone
NPM1_RPL19	NPM1	RPL19	0.260585	0.00725761	-0.400498	2.30227e-05	BRCA_chr5	1	12	9	139	0.0833333	Promiscuous	Non-aggregation prone
NPM1_RPL21	NPM1	RPL21	0.260657	0.00724081	-0.0279701	0.776998	BRCA_chr5	1	12	9	139	0.0833333	Promiscuous	Non-aggregation prone
NPM1_RPL22	NPM1	RPL22	0.320174	0.000869583	0.370693	9.91639e-05	BRCA_chr5	1	11	9	139	0.0909091	Promiscuous	Non-aggregation prone
NPM1_RPL23	NPM1	RPL23	0.295698	0.00219481	0.28022	0.00378834	BRCA_chr5	1	11	9	139	0.0909091	Promiscuous	Non-aggregation prone
NPM1_RPL23A	NPM1	RPL23A	0.360108	0.000161139	-0.318163	0.000941116	BRCA_chr5	1	11	9	139	0.0909091	Promiscuous	Non-aggregation prone
NPM1_RPL24	NPM1	RPL24	0.527079	7.63693e-09	-0.0786233	0.425312	BRCA_chr5	1	11	9	139	0.0909091	Promiscuous	Non-aggregation prone
NPM1_RPL26	NPM1	RPL26	0.391717	3.59235e-05	-0.407744	1.57958e-05	BRCA_chr5	1	12	9	139	0.0833333	Promiscuous	Non-aggregation prone
NPM1_RPL27	NPM1	RPL27	0.262845	0.00675023	-0.394941	3.05537e-05	BRCA_chr5	1	12	9	139	0.0833333	Promiscuous	Non-aggregation prone
NPM1_RPL27A	NPM1	RPL27A	0.35877	0.000171129	-0.251109	0.00977061	BRCA_chr5	1	11	9	139	0.0909091	Promiscuous	Non-aggregation prone
NPM1_RPL28	NPM1	RPL28	0.215354	0.027366	-0.363342	0.000139169	BRCA_chr5	1	12	9	139	0.0833333	Promiscuous	Non-aggregation prone
NPM1_RPL29	NPM1	RPL29	0.426446	5.73265e-06	-0.395262	3.00618e-05	BRCA_chr5	1	11	9	139	0.0909091	Promiscuous	Non-aggregation prone
NPM1_RPL3	NPM1	RPL3	0.414338	1.11261e-05	-0.283973	0.00332786	BRCA_chr5	1	11	9	139	0.0909091	Promiscuous	Non-aggregation prone
NPM1_RPL30	NPM1	RPL30	0.346672	0.000291395	0.0301783	0.759906	BRCA_chr5	1	14	9	139	0.0714286	Promiscuous	Non-aggregation prone
NPM1_RPL31	NPM1	RPL31	0.299751	0.00189298	-0.349077	0.00026258	BRCA_chr5	1	11	9	139	0.0909091	Promiscuous	Non-aggregation prone
NPM1_RPL32	NPM1	RPL32	0.449544	1.50413e-06	-0.337674	0.000427063	BRCA_chr5	1	12	9	139	0.0833333	Promiscuous	Non-aggregation prone
NPM1_RPL35	NPM1	RPL35	0.299409	0.00191692	-0.366629	0.000119721	BRCA_chr5	1	11	9	139	0.0909091	Promiscuous	Non-aggregation prone
NPM1_RPL35A	NPM1	RPL35A	0.397605	2.66935e-05	-0.415105	1.06764e-05	BRCA_chr5	1	12	9	139	0.0833333	Promiscuous	Non-aggregation prone
NPM1_RPL36	NPM1	RPL36	0.2918	0.00252538	-0.27711	0.00421233	BRCA_chr5	1	12	9	139	0.0833333	Promiscuous	Non-aggregation prone
NPM1_RPL36A	NPM1	RPL36A	0.447367	1.71353e-06	-0.350238	0.000249633	BRCA_chr5	1	11	9	139	0.0909091	Promiscuous	Non-aggregation prone
NPM1_RPL37A	NPM1	RPL37A	0.344848	0.000315171	-0.28221	0.00353745	BRCA_chr5	1	12	9	139	0.0833333	Promiscuous	Non-aggregation prone
NPM1_RPL39	NPM1	RPL39	0.302136	0.0017335	-0.300394	0.00184873	BRCA_chr5	1	11	9	139	0.0909091	Promiscuous	Non-aggregation prone
NPM1_RPL4	NPM1	RPL4	0.464431	6.01945e-07	0.06017	0.54204	BRCA_chr5	1	12	9	139	0.0833333	Promiscuous	Non-aggregation prone
NPM1_RPL5	NPM1	RPL5	0.295936	0.00217592	-0.276467	0.00430507	BRCA_chr5	1	11	9	139	0.0909091	Promiscuous	Non-aggregation prone
NPM1_RPL6	NPM1	RPL6	0.44012	2.62732e-06	-0.374414	8.32658e-05	BRCA_chr5	1	13	9	139	0.0769231	Promiscuous	Non-aggregation prone
NPM1_RPL7	NPM1	RPL7	0.25622	0.00833371	-0.0254199	0.79687	BRCA_chr5	1	12	9	139	0.0833333	Promiscuous	Non-aggregation prone
NPM1_RPL7A	NPM1	RPL7A	0.449046	1.54974e-06	-0.325596	0.00070077	BRCA_chr5	1	13	9	139	0.0769231	Promiscuous	Non-aggregation prone
NPM1_RPL8	NPM1	RPL8	0.267417	0.00581888	-0.156241	0.11147	BRCA_chr5	1	12	9	139	0.0833333	Promiscuous	Non-aggregation prone
NPM1_RPL9	NPM1	RPL9	0.265965	0.00610135	0.407526	1.59777e-05	BRCA_chr5	1	11	9	139	0.0909091	Promiscuous	Non-aggregation prone
NPM1_RPLP0	NPM1	RPLP0	0.410916	1.33572e-05	0.504987	3.9404e-08	BRCA_chr5	1	11	9	139	0.0909091	Promiscuous	Non-aggregation prone
NPM1_RPLP1	NPM1	RPLP1	0.267862	0.00573448	0.418795	8.742e-06	BRCA_chr5	1	12	9	139	0.0833333	Promiscuous	Non-aggregation prone
NPM1_RPLP2	NPM1	RPLP2	0.260616	0.00725041	0.321377	0.00082922	BRCA_chr5	1	12	9	139	0.0833333	Promiscuous	Non-aggregation prone
NPM1_RPS11	NPM1	RPS11	0.245698	0.0115249	-0.405235	1.80143e-05	BRCA_chr5	1	13	9	139	0.0769231	Promiscuous	Non-aggregation prone
NPM1_RPS12	NPM1	RPS12	0.295978	0.00217265	0.359424	0.000166181	BRCA_chr5	1	12	9	139	0.0833333	Promiscuous	Non-aggregation prone
NPM1_RPS13	NPM1	RPS13	0.456376	9.93328e-07	-0.0929401	0.345683	BRCA_chr5	1	14	9	139	0.0714286	Promiscuous	Non-aggregation prone
NPM1_RPS15	NPM1	RPS15	0.392619	3.43386e-05	0.336274	0.000452757	BRCA_chr5	1	12	9	139	0.0833333	Promiscuous	Non-aggregation prone
NPM1_RPS15A	NPM1	RPS15A	0.380676	6.17589e-05	-0.410284	1.38131e-05	BRCA_chr5	1	12	9	139	0.0833333	Promiscuous	Non-aggregation prone
NPM1_RPS16	NPM1	RPS16	0.327089	0.000659876	-0.351928	0.000231841	BRCA_chr5	1	12	9	139	0.0833333	Promiscuous	Non-aggregation prone
NPM1_RPS17	NPM1	RPS17	0.352219	0.000228906	0.137456	0.162026	BRCA_chr5	1	12	9	139	0.0833333	Promiscuous	Non-aggregation prone
NPM1_RPS18	NPM1	RPS18	0.424539	6.37476e-06	-0.404022	1.91888e-05	BRCA_chr5	1	12	9	139	0.0833333	Promiscuous	Non-aggregation prone
NPM1_RPS2	NPM1	RPS2	0.475368	2.98637e-07	-0.187197	0.0558539	BRCA_chr5	1	12	9	139	0.0833333	Promiscuous	Non-aggregation prone
NPM1_RPS24	NPM1	RPS24	0.348808	0.000265673	0.252716	0.00929703	BRCA_chr5	1	12	9	139	0.0833333	Promiscuous	Non-aggregation prone
NPM1_RPS29	NPM1	RPS29	0.328644	0.000619613	-0.447346	1.71565e-06	BRCA_chr5	1	12	9	139	0.0833333	Promiscuous	Non-aggregation prone
NPM1_RPS3A	NPM1	RPS3A	0.501659	4.99536e-08	-0.387363	4.45846e-05	BRCA_chr5	1	12	9	139	0.0833333	Promiscuous	Non-aggregation prone
NPM1_RPS6	NPM1	RPS6	0.24266	0.0126256	-0.144557	0.141215	BRCA_chr5	1	13	9	139	0.0769231	Promiscuous	Non-aggregation prone
NPM1_RPS7	NPM1	RPS7	0.208522	0.0327889	0.11949	0.224707	BRCA_chr5	1	12	9	139	0.0833333	Promiscuous	Non-aggregation prone
NPM1_RPS8	NPM1	RPS8	0.339001	0.000403946	-0.216328	0.0266584	BRCA_chr5	1	12	9	139	0.0833333	Promiscuous	Non-aggregation prone
NPM1_RPS9	NPM1	RPS9	0.335362	0.000470264	-0.278177	0.00406221	BRCA_chr5	1	12	9	139	0.0833333	Promiscuous	Non-aggregation prone
NPM1_RSL1D1	NPM1	RSL1D1	0.594578	2.27234e-11	-0.110211	0.263044	BRCA_chr5	1	9	9	139	0.111111	Promiscuous	Non-aggregation prone
NPM1_SCYL2	NPM1	SCYL2	0.117054	0.234369	0.105754	0.282959	BRCA_chr5	1	9	9	139	0.111111	Promiscuous	Non-aggregation prone
NPM1_SLC25A5	NPM1	SLC25A5	0.145324	0.139094	0.0848642	0.389379	BRCA_chr5	1	12	9	139	0.0833333	Promiscuous	Non-aggregation prone
NPM1_SNU13	NPM1	SNU13	0.199554	0.0412587	0.265084	0.00627873	BRCA_chr5	1	10	9	139	0.1	Promiscuous	Non-aggregation prone
NPM1_SRP14	NPM1	SRP14	0.190545	0.0515331	-0.201379	0.0394013	BRCA_chr5	1	9	9	139	0.111111	Promiscuous	Non-aggregation prone
NPM1_SRPK1	NPM1	SRPK1	0.164027	0.0945249	-0.265747	0.00614476	BRCA_chr5	1	11	9	139	0.0909091	Promiscuous	Non-aggregation prone
NPM1_SSB	NPM1	SSB	0.293127	0.00240812	-0.0822206	0.404372	BRCA_chr5	1	10	9	139	0.1	Promiscuous	Non-aggregation prone
NPM1_SSRP1	NPM1	SSRP1	0.182905	0.0618222	0.365561	0.000125744	BRCA_chr5	1	15	9	139	0.0666667	Promiscuous	Non-aggregation prone
NPM1_SUPT16H	NPM1	SUPT16H	0.334532	0.000486716	0.193531	0.0479166	BRCA_chr5	1	16	9	139	0.0625	Promiscuous	Non-aggregation prone
NPM1_TLE1	NPM1	TLE1	-0.219697	0.0243307	-0.0304893	0.757508	BRCA_chr5	2	18	9	139	0.111111	Promiscuous	Non-aggregation prone
NPM1_TOP2A	NPM1	TOP2A	0.211798	0.0300849	-0.0822724	0.404075	BRCA_chr5	1	14	9	139	0.0714286	Promiscuous	Non-aggregation prone
NPM1_TOP2B	NPM1	TOP2B	0.230541	0.0179799	-0.0517935	0.599775	BRCA_chr5	2	10	9	139	0.2	Promiscuous	Non-aggregation prone
NPM1_TUFM	NPM1	TUFM	0.219801	0.0242619	0.148403	0.130824	BRCA_chr5	1	9	9	139	0.111111	Promiscuous	Non-aggregation prone
NPM1_U2AF1	NPM1	U2AF1	-0.117634	0.232041	0.0400995	0.684638	BRCA_chr5	1	13	9	139	0.0769231	Promiscuous	Non-aggregation prone
NPM1_U2AF2	NPM1	U2AF2	0.237373	0.0147611	0.550425	1.18097e-09	BRCA_chr5	1	12	9	139	0.0833333	Promiscuous	Non-aggregation prone
NPM1_YBX1	NPM1	YBX1	0.00162762	0.986853	-0.348134	0.000273553	BRCA_chr5	1	14	9	139	0.0714286	Promiscuous	Non-aggregation prone
NPM1_YBX3	NPM1	YBX3	-0.00357661	0.971114	-0.453825	1.16095e-06	BRCA_chr5	1	9	9	139	0.111111	Promiscuous	Non-aggregation prone
NUDCD3_DYNC2H1	NUDCD3	DYNC2H1	0.358076	0.000176541	-0.0544578	0.581115	BRCA_chr7	1	1	1	11	1	Non-promiscuous	Non-aggregation prone
NUDCD3_DYNC2LI1	NUDCD3	DYNC2LI1	0.460015	7.93435e-07	-0.0180921	0.864841	BRCA_chr7	1	1	1	11	1	Non-promiscuous	Non-aggregation prone
NUDCD3_DYNLL1	NUDCD3	DYNLL1	0.0307589	0.755432	-0.0242588	0.805962	BRCA_chr7	1	4	1	11	0.25	Non-promiscuous	Non-aggregation prone
NUDCD3_DYNLL2	NUDCD3	DYNLL2	0.388171	4.28413e-05	-0.0479784	0.626948	BRCA_chr7	1	2	1	11	0.5	Non-promiscuous	Non-aggregation prone
NUDCD3_DYNLRB1	NUDCD3	DYNLRB1	-0.0418101	0.671943	-0.0785507	0.42574	BRCA_chr7	1	1	1	11	1	Non-promiscuous	Non-aggregation prone
NUDCD3_DYNLT1	NUDCD3	DYNLT1	-0.140556	0.152678	-0.272341	0.00494507	BRCA_chr7	1	1	1	11	1	Non-promiscuous	Non-aggregation prone
NUDCD3_DYNLT3	NUDCD3	DYNLT3	0.469075	4.48311e-07	-0.284615	0.00325423	BRCA_chr7	1	1	1	11	1	Non-promiscuous	Non-aggregation prone
NUDCD3_TCTEX1D2	NUDCD3	TCTEX1D2	0.234885	0.0158701	-0.0709965	0.58031	BRCA_chr7	1	1	1	11	1	Non-promiscuous	Non-aggregation prone
NUDCD3_WDR34	NUDCD3	WDR34	-0.0134564	0.89163	-0.156284	0.116743	BRCA_chr7	1	1	1	11	1	Non-promiscuous	Non-aggregation prone
OGDH_DLST	OGDH	DLST	0.222412	0.0372748	0.305861	0.00375556	COREAD_chr7	1	1	1	3	1	Non-promiscuous	Non-aggregation prone
PAXBP1_ACIN1	PAXBP1	ACIN1	0.473461	3.38065e-07	-0.335953	0.000458855	BRCA_chr21	1	2	1	142	0.5	Non-promiscuous	Aggregation prone
PAXBP1_ALYREF	PAXBP1	ALYREF	0.132355	0.178324	-0.126571	0.198227	BRCA_chr21	1	6	1	142	0.166667	Non-promiscuous	Aggregation prone
PAXBP1_AQR	PAXBP1	AQR	0.335279	0.000471886	0.292349	0.00247622	BRCA_chr21	1	2	1	142	0.5	Non-promiscuous	Aggregation prone
PAXBP1_BCAS2	PAXBP1	BCAS2	0.274611	0.00458314	0.343479	0.000334164	BRCA_chr21	1	3	1	142	0.333333	Non-promiscuous	Aggregation prone
PAXBP1_BUD13	PAXBP1	BUD13	0.297802	0.00203307	-0.181733	0.0635386	BRCA_chr21	1	1	1	142	1	Non-promiscuous	Aggregation prone
PAXBP1_BUD31	PAXBP1	BUD31	0.0563342	0.568137	0.00539084	0.956474	BRCA_chr21	1	1	1	142	1	Non-promiscuous	Aggregation prone
PAXBP1_CACTIN	PAXBP1	CACTIN	0.193355	0.0481241	0.117862	0.231131	BRCA_chr21	1	2	1	142	0.5	Non-promiscuous	Aggregation prone
PAXBP1_CD2BP2	PAXBP1	CD2BP2	0.184636	0.0593549	-0.0288721	0.770004	BRCA_chr21	1	1	1	142	1	Non-promiscuous	Aggregation prone
PAXBP1_CDC40	PAXBP1	CDC40	0.515001	1.90011e-08	0.136668	0.164468	BRCA_chr21	1	2	1	142	0.5	Non-promiscuous	Aggregation prone
PAXBP1_CDC5L	PAXBP1	CDC5L	0.490545	1.08341e-07	0.541769	2.39917e-09	BRCA_chr21	1	5	1	142	0.2	Non-promiscuous	Aggregation prone
PAXBP1_CDK12	PAXBP1	CDK12	0.40592	1.73819e-05	-0.0490773	0.619067	BRCA_chr21	1	1	1	142	1	Non-promiscuous	Aggregation prone
PAXBP1_CFAP20	PAXBP1	CFAP20	0.41611	1.01128e-05	0.309631	0.00130824	BRCA_chr21	1	1	1	142	1	Non-promiscuous	Aggregation prone
PAXBP1_CIRBP	PAXBP1	CIRBP	0.0465996	0.636895	-0.334221	0.000493021	BRCA_chr21	1	1	1	142	1	Non-promiscuous	Aggregation prone
PAXBP1_CPSF6	PAXBP1	CPSF6	0.61751	2.27995e-12	-0.0885859	0.368845	BRCA_chr21	1	5	1	142	0.2	Non-promiscuous	Aggregation prone
PAXBP1_CRNKL1	PAXBP1	CRNKL1	0.270682	0.00522538	0.45764	9.18974e-07	BRCA_chr21	1	2	1	142	0.5	Non-promiscuous	Aggregation prone
PAXBP1_CTNNBL1	PAXBP1	CTNNBL1	0.193552	0.0478922	0.301451	0.00177797	BRCA_chr21	1	1	1	142	1	Non-promiscuous	Aggregation prone
PAXBP1_CWC15	PAXBP1	CWC15	-0.0435932	0.658807	-0.0772548	0.433438	BRCA_chr21	1	3	1	142	0.333333	Non-promiscuous	Aggregation prone
PAXBP1_CWC22	PAXBP1	CWC22	0.428706	5.05084e-06	-0.200632	0.0401525	BRCA_chr21	1	2	1	142	0.5	Non-promiscuous	Aggregation prone
PAXBP1_DDX17	PAXBP1	DDX17	0.515219	1.86973e-08	0.371335	9.62306e-05	BRCA_chr21	1	3	1	142	0.333333	Non-promiscuous	Aggregation prone
PAXBP1_DDX23	PAXBP1	DDX23	0.330116	0.000583585	-0.0580033	0.556708	BRCA_chr21	1	3	1	142	0.333333	Non-promiscuous	Aggregation prone
PAXBP1_DDX39B	PAXBP1	DDX39B	0.671615	4.44089e-15	0.423139	6.88836e-06	BRCA_chr21	1	3	1	142	0.333333	Non-promiscuous	Aggregation prone
PAXBP1_DDX3X	PAXBP1	DDX3X	0.542225	2.31237e-09	0.136119	0.166188	BRCA_chr21	1	3	1	142	0.333333	Non-promiscuous	Aggregation prone
PAXBP1_DDX41	PAXBP1	DDX41	0.151244	0.123533	0.345076	0.000312104	BRCA_chr21	1	2	1	142	0.5	Non-promiscuous	Aggregation prone
PAXBP1_DDX46	PAXBP1	DDX46	0.436139	3.3089e-06	-0.0336513	0.73326	BRCA_chr21	1	2	1	142	0.5	Non-promiscuous	Aggregation prone
PAXBP1_DDX5	PAXBP1	DDX5	0.406873	1.65351e-05	0.413135	1.1867e-05	BRCA_chr21	1	6	1	142	0.166667	Non-promiscuous	Aggregation prone
PAXBP1_DHX15	PAXBP1	DHX15	0.453359	1.19438e-06	0.351503	0.000236203	BRCA_chr21	1	5	1	142	0.2	Non-promiscuous	Aggregation prone
PAXBP1_DHX16	PAXBP1	DHX16	0.475565	2.94825e-07	0.375057	8.07732e-05	BRCA_chr21	1	2	1	142	0.5	Non-promiscuous	Aggregation prone
PAXBP1_DHX38	PAXBP1	DHX38	0.45086	1.38951e-06	-0.000995231	0.991961	BRCA_chr21	1	3	1	142	0.333333	Non-promiscuous	Aggregation prone
PAXBP1_DHX8	PAXBP1	DHX8	0.312554	0.00116989	0.220755	0.0236369	BRCA_chr21	1	2	1	142	0.5	Non-promiscuous	Aggregation prone
PAXBP1_DHX9	PAXBP1	DHX9	0.545366	1.79143e-09	0.586357	4.96141e-11	BRCA_chr21	1	9	1	142	0.111111	Non-promiscuous	Aggregation prone
PAXBP1_DNAJC8	PAXBP1	DNAJC8	0.252405	0.00938708	-0.331039	0.000561995	BRCA_chr21	1	2	1	142	0.5	Non-promiscuous	Aggregation prone
PAXBP1_EFTUD2	PAXBP1	EFTUD2	0.272486	0.00492119	0.482179	1.90615e-07	BRCA_chr21	1	4	1	142	0.25	Non-promiscuous	Aggregation prone
PAXBP1_EIF4A3	PAXBP1	EIF4A3	0.274663	0.00457516	0.422859	6.99565e-06	BRCA_chr21	1	11	1	142	0.0909091	Non-promiscuous	Aggregation prone
PAXBP1_HTATSF1	PAXBP1	HTATSF1	0.307257	0.00143136	-0.0949305	0.335406	BRCA_chr21	1	2	1	142	0.5	Non-promiscuous	Aggregation prone
PAXBP1_IGF2BP3	PAXBP1	IGF2BP3	0.19249	0.0491533	0.266577	0.00598086	BRCA_chr21	1	1	1	142	1	Non-promiscuous	Aggregation prone
PAXBP1_IK	PAXBP1	IK	0.106044	0.281633	-0.223077	0.0221725	BRCA_chr21	1	1	1	142	1	Non-promiscuous	Aggregation prone
PAXBP1_ISY1	PAXBP1	ISY1	0.191385	0.0504939	-0.236502	0.0151413	BRCA_chr21	1	2	1	142	0.5	Non-promiscuous	Aggregation prone
PAXBP1_LSM2	PAXBP1	LSM2	0.0937383	0.341538	0.33391	0.000499401	BRCA_chr21	1	5	1	142	0.2	Non-promiscuous	Aggregation prone
PAXBP1_LSM3	PAXBP1	LSM3	0.208553	0.0327623	0.282044	0.00355777	BRCA_chr21	1	4	1	142	0.25	Non-promiscuous	Aggregation prone
PAXBP1_LSM4	PAXBP1	LSM4	0.127524	0.19484	0.396154	2.87357e-05	BRCA_chr21	1	3	1	142	0.333333	Non-promiscuous	Aggregation prone
PAXBP1_LSM6	PAXBP1	LSM6	0.282107	0.00355014	-0.150549	0.125286	BRCA_chr21	1	3	1	142	0.333333	Non-promiscuous	Aggregation prone
PAXBP1_LSM7	PAXBP1	LSM7	0.0822724	0.404075	0.203131	0.037684	BRCA_chr21	1	3	1	142	0.333333	Non-promiscuous	Aggregation prone
PAXBP1_LUC7L3	PAXBP1	LUC7L3	0.443614	2.14069e-06	-0.24266	0.0126256	BRCA_chr21	1	1	1	142	1	Non-promiscuous	Aggregation prone
PAXBP1_MAGOH	PAXBP1	MAGOH	0.163187	0.0962483	0.405463	1.78011e-05	BRCA_chr21	1	12	1	142	0.0833333	Non-promiscuous	Aggregation prone
PAXBP1_MFAP1	PAXBP1	MFAP1	0.163581	0.0954368	-0.294951	0.00225491	BRCA_chr21	1	1	1	142	1	Non-promiscuous	Aggregation prone
PAXBP1_MOV10	PAXBP1	MOV10	0.334947	0.000478425	0.258439	0.00777031	BRCA_chr21	1	3	1	142	0.333333	Non-promiscuous	Aggregation prone
PAXBP1_NCBP1	PAXBP1	NCBP1	0.487414	1.34085e-07	0.585072	5.59472e-11	BRCA_chr21	1	7	1	142	0.142857	Non-promiscuous	Aggregation prone
PAXBP1_NCBP2	PAXBP1	NCBP2	0.353266	0.0002186	-0.0218744	0.824712	BRCA_chr21	1	6	1	142	0.166667	Non-promiscuous	Aggregation prone
PAXBP1_NUDT21	PAXBP1	NUDT21	0.533351	4.68983e-09	0.375389	7.95141e-05	BRCA_chr21	1	5	1	142	0.2	Non-promiscuous	Aggregation prone
PAXBP1_PABPC1	PAXBP1	PABPC1	0.221356	0.02325	0.145687	0.1381	BRCA_chr21	1	6	1	142	0.166667	Non-promiscuous	Aggregation prone
PAXBP1_PLRG1	PAXBP1	PLRG1	0.356956	0.000185601	-0.00726726	0.941347	BRCA_chr21	1	4	1	142	0.25	Non-promiscuous	Aggregation prone
PAXBP1_PPIE	PAXBP1	PPIE	0.213788	0.0285361	0.260875	0.00719061	BRCA_chr21	1	2	1	142	0.5	Non-promiscuous	Aggregation prone
PAXBP1_PPIH	PAXBP1	PPIH	0.067147	0.496134	0.109786	0.2649	BRCA_chr21	1	1	1	142	1	Non-promiscuous	Aggregation prone
PAXBP1_PPIL1	PAXBP1	PPIL1	0.254188	0.008881	-0.263135	0.00668739	BRCA_chr21	1	2	1	142	0.5	Non-promiscuous	Aggregation prone
PAXBP1_PPIL2	PAXBP1	PPIL2	0.114846	0.243374	-0.0562306	0.56885	BRCA_chr21	1	1	1	142	1	Non-promiscuous	Aggregation prone
PAXBP1_PPIL3	PAXBP1	PPIL3	0.269334	0.00546345	0.11383	0.247597	BRCA_chr21	1	2	1	142	0.5	Non-promiscuous	Aggregation prone
PAXBP1_PPM1G	PAXBP1	PPM1G	0.215374	0.0273508	-0.119086	0.226291	BRCA_chr21	1	1	1	142	1	Non-promiscuous	Aggregation prone
PAXBP1_PPWD1	PAXBP1	PPWD1	0.402447	2.08221e-05	-0.125886	0.200683	BRCA_chr21	1	2	1	142	0.5	Non-promiscuous	Aggregation prone
PAXBP1_PRPF18	PAXBP1	PRPF18	0.477846	2.53922e-07	-0.0798258	0.418243	BRCA_chr21	1	1	1	142	1	Non-promiscuous	Aggregation prone
PAXBP1_PRPF19	PAXBP1	PRPF19	0.0400477	0.685024	0.439726	2.68833e-06	BRCA_chr21	1	4	1	142	0.25	Non-promiscuous	Aggregation prone
PAXBP1_PRPF3	PAXBP1	PRPF3	0.489198	1.18785e-07	0.394143	3.18084e-05	BRCA_chr21	1	1	1	142	1	Non-promiscuous	Aggregation prone
PAXBP1_PRPF31	PAXBP1	PRPF31	-0.0350612	0.722531	0.386087	4.74688e-05	BRCA_chr21	1	2	1	142	0.5	Non-promiscuous	Aggregation prone
PAXBP1_PRPF4	PAXBP1	PRPF4	0.200394	0.040395	0.485351	1.5413e-07	BRCA_chr21	1	1	1	142	1	Non-promiscuous	Aggregation prone
PAXBP1_PRPF40A	PAXBP1	PRPF40A	0.600985	1.21747e-11	-0.0428882	0.663989	BRCA_chr21	1	1	1	142	1	Non-promiscuous	Aggregation prone
PAXBP1_PRPF4B	PAXBP1	PRPF4B	0.587083	4.635e-11	0.227027	0.01986	BRCA_chr21	1	2	1	142	0.5	Non-promiscuous	Aggregation prone
PAXBP1_PRPF8	PAXBP1	PRPF8	0.317945	0.000949173	0.218775	0.0249502	BRCA_chr21	1	6	1	142	0.166667	Non-promiscuous	Aggregation prone
PAXBP1_PUF60	PAXBP1	PUF60	0.204043	0.036815	0.40621	1.71199e-05	BRCA_chr21	1	2	1	142	0.5	Non-promiscuous	Aggregation prone
PAXBP1_RBM15	PAXBP1	RBM15	0.510118	2.71955e-08	-0.0569044	0.56422	BRCA_chr21	1	1	1	142	1	Non-promiscuous	Aggregation prone
PAXBP1_RBM17	PAXBP1	RBM17	0.375461	7.92411e-05	0.269345	0.00546159	BRCA_chr21	1	2	1	142	0.5	Non-promiscuous	Aggregation prone
PAXBP1_RBM22	PAXBP1	RBM22	0.27739	0.00417251	-0.160481	0.101971	BRCA_chr21	1	2	1	142	0.5	Non-promiscuous	Aggregation prone
PAXBP1_RBM25	PAXBP1	RBM25	0.584564	5.86586e-11	-0.0195003	0.843479	BRCA_chr21	1	1	1	142	1	Non-promiscuous	Aggregation prone
PAXBP1_RBM39	PAXBP1	RBM39	0.490058	1.12012e-07	0.344163	0.000324539	BRCA_chr21	1	1	1	142	1	Non-promiscuous	Aggregation prone
PAXBP1_RBM8A	PAXBP1	RBM8A	0.302571	0.00170572	0.0261352	0.791283	BRCA_chr21	1	15	1	142	0.0666667	Non-promiscuous	Aggregation prone
PAXBP1_RNPS1	PAXBP1	RNPS1	0.368567	0.000109465	0.416359	9.97776e-06	BRCA_chr21	1	6	1	142	0.166667	Non-promiscuous	Aggregation prone
PAXBP1_SART1	PAXBP1	SART1	-0.0516276	0.600945	-0.0279287	0.77732	BRCA_chr21	1	2	1	142	0.5	Non-promiscuous	Aggregation prone
PAXBP1_SF1	PAXBP1	SF1	0.321833	0.000814363	0.0942049	0.33913	BRCA_chr21	1	1	1	142	1	Non-promiscuous	Aggregation prone
PAXBP1_SF3A1	PAXBP1	SF3A1	0.256479	0.00826609	0.303836	0.00162732	BRCA_chr21	1	5	1	142	0.2	Non-promiscuous	Aggregation prone
PAXBP1_SF3A2	PAXBP1	SF3A2	-0.0444537	0.652505	0.0408874	0.678779	BRCA_chr21	1	4	1	142	0.25	Non-promiscuous	Aggregation prone
PAXBP1_SF3A3	PAXBP1	SF3A3	0.322973	0.000778279	0.421252	7.6427e-06	BRCA_chr21	1	4	1	142	0.25	Non-promiscuous	Aggregation prone
PAXBP1_SF3B1	PAXBP1	SF3B1	0.516452	1.70616e-08	0.0449409	0.648947	BRCA_chr21	1	8	1	142	0.125	Non-promiscuous	Aggregation prone
PAXBP1_SF3B2	PAXBP1	SF3B2	0.231671	0.017409	0.040566	0.681167	BRCA_chr21	1	6	1	142	0.166667	Non-promiscuous	Aggregation prone
PAXBP1_SF3B3	PAXBP1	SF3B3	0.429961	4.70619e-06	0.487487	1.33428e-07	BRCA_chr21	1	14	1	142	0.0714286	Non-promiscuous	Aggregation prone
PAXBP1_SF3B4	PAXBP1	SF3B4	-0.0231391	0.814753	0.438399	2.90384e-06	BRCA_chr21	1	5	1	142	0.2	Non-promiscuous	Aggregation prone
PAXBP1_SF3B6	PAXBP1	SF3B6	0.168039	0.0866247	0.148383	0.130879	BRCA_chr21	1	4	1	142	0.25	Non-promiscuous	Aggregation prone
PAXBP1_SLU7	PAXBP1	SLU7	0.278509	0.00401655	-0.327265	0.000655195	BRCA_chr21	1	2	1	142	0.5	Non-promiscuous	Aggregation prone
PAXBP1_SMNDC1	PAXBP1	SMNDC1	0.403421	1.97973e-05	0.0860771	0.382613	BRCA_chr21	1	2	1	142	0.5	Non-promiscuous	Aggregation prone
PAXBP1_SMU1	PAXBP1	SMU1	0.366857	0.00011847	0.256479	0.00826609	BRCA_chr21	1	1	1	142	1	Non-promiscuous	Aggregation prone
PAXBP1_SNRNP200	PAXBP1	SNRNP200	0.409247	1.45923e-05	0.522279	1.10178e-08	BRCA_chr21	1	3	1	142	0.333333	Non-promiscuous	Aggregation prone
PAXBP1_SNRNP27	PAXBP1	SNRNP27	0.523067	1.03785e-08	0.376384	7.58455e-05	BRCA_chr21	1	1	1	142	1	Non-promiscuous	Aggregation prone
PAXBP1_SNRNP40	PAXBP1	SNRNP40	0.2952	0.00223471	0.253877	0.0089675	BRCA_chr21	1	3	1	142	0.333333	Non-promiscuous	Aggregation prone
PAXBP1_SNRNP70	PAXBP1	SNRNP70	0.264379	0.00642391	-0.244547	0.0119316	BRCA_chr21	1	2	1	142	0.5	Non-promiscuous	Aggregation prone
PAXBP1_SNRPA	PAXBP1	SNRPA	0.14097	0.151459	0.243199	0.0124238	BRCA_chr21	1	5	1	142	0.2	Non-promiscuous	Aggregation prone
PAXBP1_SNRPA1	PAXBP1	SNRPA1	0.252675	0.00930899	0.285196	0.003189	BRCA_chr21	1	5	1	142	0.2	Non-promiscuous	Aggregation prone
PAXBP1_SNRPB2	PAXBP1	SNRPB2	0.190224	0.0519354	0.160875	0.101121	BRCA_chr21	1	4	1	142	0.25	Non-promiscuous	Aggregation prone
PAXBP1_SNRPC	PAXBP1	SNRPC	0.132635	0.177399	0.278841	0.00397135	BRCA_chr21	1	1	1	142	1	Non-promiscuous	Aggregation prone
PAXBP1_SNRPD1	PAXBP1	SNRPD1	0.173461	0.076793	0.458947	8.47741e-07	BRCA_chr21	1	17	1	142	0.0588235	Non-promiscuous	Aggregation prone
PAXBP1_SNRPD2	PAXBP1	SNRPD2	-0.0086046	0.930578	-0.0235642	0.811413	BRCA_chr21	1	13	1	142	0.0769231	Non-promiscuous	Aggregation prone
PAXBP1_SNRPD3	PAXBP1	SNRPD3	0.0570496	0.563225	0.503266	4.45611e-08	BRCA_chr21	1	16	1	142	0.0625	Non-promiscuous	Aggregation prone
PAXBP1_SNRPE	PAXBP1	SNRPE	0.297066	0.00208837	0.404406	1.88098e-05	BRCA_chr21	1	12	1	142	0.0833333	Non-promiscuous	Aggregation prone
PAXBP1_SNRPF	PAXBP1	SNRPF	0.0311113	0.752719	0.354396	0.000207961	BRCA_chr21	1	11	1	142	0.0909091	Non-promiscuous	Aggregation prone
PAXBP1_SNRPG	PAXBP1	SNRPG	0.14379	0.143361	-0.194049	0.0473107	BRCA_chr21	1	11	1	142	0.0909091	Non-promiscuous	Aggregation prone
PAXBP1_SNU13	PAXBP1	SNU13	-0.140462	0.152953	0.0845532	0.391126	BRCA_chr21	1	2	1	142	0.5	Non-promiscuous	Aggregation prone
PAXBP1_SNW1	PAXBP1	SNW1	0.265302	0.00623449	-0.0113	0.908914	BRCA_chr21	1	4	1	142	0.25	Non-promiscuous	Aggregation prone
PAXBP1_SPEN	PAXBP1	SPEN	0.506801	3.45867e-08	-0.235994	0.0153671	BRCA_chr21	1	6	1	142	0.166667	Non-promiscuous	Aggregation prone
PAXBP1_SRRM1	PAXBP1	SRRM1	0.481153	2.04084e-07	0.186803	0.0563812	BRCA_chr21	1	9	1	142	0.111111	Non-promiscuous	Aggregation prone
PAXBP1_SRRM2	PAXBP1	SRRM2	0.530748	5.74825e-09	-0.165996	0.0905779	BRCA_chr21	1	4	1	142	0.25	Non-promiscuous	Aggregation prone
PAXBP1_SRRT	PAXBP1	SRRT	0.344464	0.000320392	-0.302094	0.00173616	BRCA_chr21	1	2	1	142	0.5	Non-promiscuous	Aggregation prone
PAXBP1_SRSF1	PAXBP1	SRSF1	0.563653	3.84188e-10	0.342899	0.000342536	BRCA_chr21	1	5	1	142	0.2	Non-promiscuous	Aggregation prone
PAXBP1_SRSF11	PAXBP1	SRSF11	0.706915	0	0.246382	0.0112889	BRCA_chr21	1	1	1	142	1	Non-promiscuous	Aggregation prone
PAXBP1_SRSF2	PAXBP1	SRSF2	0.558107	6.18911e-10	-0.307765	0.00140416	BRCA_chr21	1	2	1	142	0.5	Non-promiscuous	Aggregation prone
PAXBP1_SRSF3	PAXBP1	SRSF3	0.542038	2.34751e-09	-0.249979	0.0101162	BRCA_chr21	1	1	1	142	1	Non-promiscuous	Aggregation prone
PAXBP1_SRSF4	PAXBP1	SRSF4	0.303359	0.00165649	-0.302467	0.0017123	BRCA_chr21	1	2	1	142	0.5	Non-promiscuous	Aggregation prone
PAXBP1_SRSF5	PAXBP1	SRSF5	0.178043	0.0692013	-0.14521	0.139408	BRCA_chr21	1	2	1	142	0.5	Non-promiscuous	Aggregation prone
PAXBP1_SRSF6	PAXBP1	SRSF6	0.466079	5.4244e-07	-0.299803	0.00188937	BRCA_chr21	1	4	1	142	0.25	Non-promiscuous	Aggregation prone
PAXBP1_SRSF7	PAXBP1	SRSF7	0.627473	7.91367e-13	-0.272382	0.00493824	BRCA_chr21	1	2	1	142	0.5	Non-promiscuous	Aggregation prone
PAXBP1_SRSF9	PAXBP1	SRSF9	0.194174	0.0471662	-0.108097	0.27237	BRCA_chr21	1	3	1	142	0.333333	Non-promiscuous	Aggregation prone
PAXBP1_SYF2	PAXBP1	SYF2	0.177877	0.0694651	-0.0632179	0.521732	BRCA_chr21	1	2	1	142	0.5	Non-promiscuous	Aggregation prone
PAXBP1_TCERG1	PAXBP1	TCERG1	0.636284	3.00648e-13	-0.202975	0.0378339	BRCA_chr21	1	1	1	142	1	Non-promiscuous	Aggregation prone
PAXBP1_TFIP11	PAXBP1	TFIP11	0.040338	0.682863	0.48841	1.25328e-07	BRCA_chr21	1	5	1	142	0.2	Non-promiscuous	Aggregation prone
PAXBP1_THOC1	PAXBP1	THOC1	0.378271	6.93196e-05	0.310637	0.00125906	BRCA_chr21	1	4	1	142	0.25	Non-promiscuous	Aggregation prone
PAXBP1_THOC2	PAXBP1	THOC2	0.511186	2.51566e-08	0.0233672	0.81296	BRCA_chr21	1	4	1	142	0.25	Non-promiscuous	Aggregation prone
PAXBP1_THOC3	PAXBP1	THOC3	0.189001	0.0534907	-0.0360875	0.714754	BRCA_chr21	1	3	1	142	0.333333	Non-promiscuous	Aggregation prone
PAXBP1_THOC5	PAXBP1	THOC5	0.0560751	0.569921	0.348839	0.000265314	BRCA_chr21	1	4	1	142	0.25	Non-promiscuous	Aggregation prone
PAXBP1_THOC6	PAXBP1	THOC6	0.168972	0.0848649	0.338513	0.000412297	BRCA_chr21	1	4	1	142	0.25	Non-promiscuous	Aggregation prone
PAXBP1_THOC7	PAXBP1	THOC7	-0.0314327	0.750248	-0.166763	0.0890765	BRCA_chr21	1	4	1	142	0.25	Non-promiscuous	Aggregation prone
PAXBP1_TRA2B	PAXBP1	TRA2B	0.572341	1.78807e-10	-0.291748	0.00253006	BRCA_chr21	1	3	1	142	0.333333	Non-promiscuous	Aggregation prone
PAXBP1_TXNL4A	PAXBP1	TXNL4A	0.227835	0.0194131	0.384439	5.14556e-05	BRCA_chr21	1	1	1	142	1	Non-promiscuous	Aggregation prone
PAXBP1_U2AF2	PAXBP1	U2AF2	0.282863	0.00345844	0.422051	7.31452e-06	BRCA_chr21	1	4	1	142	0.25	Non-promiscuous	Aggregation prone
PAXBP1_U2SURP	PAXBP1	U2SURP	0.698134	0	0.0979681	0.320101	BRCA_chr21	1	2	1	142	0.5	Non-promiscuous	Aggregation prone
PAXBP1_USP39	PAXBP1	USP39	0.349565	0.000257073	0.20255	0.038246	BRCA_chr21	1	1	1	142	1	Non-promiscuous	Aggregation prone
PAXBP1_WBP11	PAXBP1	WBP11	0.318588	0.000925565	-0.221252	0.0233163	BRCA_chr21	1	1	1	142	1	Non-promiscuous	Aggregation prone
PAXBP1_WTAP	PAXBP1	WTAP	0.489934	1.12968e-07	-0.269853	0.00537077	BRCA_chr21	1	2	1	142	0.5	Non-promiscuous	Aggregation prone
PAXBP1_XAB2	PAXBP1	XAB2	0.231796	0.0173471	-0.142111	0.148143	BRCA_chr21	1	2	1	142	0.5	Non-promiscuous	Aggregation prone
PAXBP1_ZNF207	PAXBP1	ZNF207	0.470257	4.15635e-07	0.19349	0.0479653	BRCA_chr21	1	1	1	142	1	Non-promiscuous	Aggregation prone
PCCB_PCCA	PCCB	PCCA	0.0882211	0.340042	0.898569	0	OV_chr3	1	1	1	1	1	Non-promiscuous	Non-aggregation prone
PDCD6_CUL3	PDCD6	CUL3	0.293116	0.00240902	0.178685	0.0681868	BRCA_chr5	1	23	3	5	0.0434783	Non-promiscuous	Non-aggregation prone
PDCD6_KLHL12	PDCD6	KLHL12	0.271325	0.00511512	0.271123	0.0110833	BRCA_chr5	1	4	3	5	0.25	Non-promiscuous	Non-aggregation prone
PDCD6_PEF1	PDCD6	PEF1	0.21893	0.0248449	0.663	1.31006e-14	BRCA_chr5	2	3	3	5	0.666667	Non-promiscuous	Non-aggregation prone
PDCD6_PTGES3	PDCD6	PTGES3	0.449409	1.51636e-06	0.226519	0.0201453	BRCA_chr5	1	4	3	5	0.25	Non-promiscuous	Non-aggregation prone
PDS5B_PDS5A	PDS5B	PDS5A	0.582632	2.59757e-09	0.244648	0.0216066	COREAD_chr13	2	2	2	5	1	Non-promiscuous	Non-aggregation prone
PDS5B_RAD21	PDS5B	RAD21	0.561305	1.27956e-08	0.275653	0.00933732	COREAD_chr13	2	10	2	5	0.2	Non-promiscuous	Non-aggregation prone
PDS5B_SMC1A	PDS5B	SMC1A	0.296696	0.00500114	0.510358	3.78193e-07	COREAD_chr13	2	12	2	5	0.166667	Non-promiscuous	Non-aggregation prone
PDS5B_SMC3	PDS5B	SMC3	0.636346	2.68527e-11	0.426836	3.36777e-05	COREAD_chr13	2	11	2	5	0.181818	Non-promiscuous	Non-aggregation prone
PDXK_LIG3	PDXK	LIG3	-0.122652	0.21259	-0.452384	1.26718e-06	BRCA_chr21	2	8	2	5	0.25	Non-promiscuous	Non-aggregation prone
PDXK_NEIL1	PDXK	NEIL1	-0.183112	0.0615224	0.442847	0.0026098	BRCA_chr21	1	2	2	5	0.5	Non-promiscuous	Non-aggregation prone
PDXK_NEIL2	PDXK	NEIL2	-0.072683	0.46122	-0.0474015	0.636144	BRCA_chr21	1	2	2	5	0.5	Non-promiscuous	Non-aggregation prone
PDXK_POLB	PDXK	POLB	-0.060989	0.536545	0.212948	0.029181	BRCA_chr21	2	4	2	5	0.5	Non-promiscuous	Non-aggregation prone
PDXK_XRCC1	PDXK	XRCC1	-0.135953	0.166709	-0.680251	1.33227e-15	BRCA_chr21	2	9	2	5	0.222222	Non-promiscuous	Non-aggregation prone
PEX1_PEX26	PEX1	PEX26	0.0929297	0.345737	0.209244	0.0844351	BRCA_chr7	1	1	1	2	1	Non-promiscuous	Non-aggregation prone
PEX1_PEX6	PEX1	PEX6	0.261393	0.00707232	0.553535	9.10938e-10	BRCA_chr7	1	1	1	2	1	Non-promiscuous	Non-aggregation prone
PFKL_CDC5L	PFKL	CDC5L	0.22542	0.0207744	0.0446817	0.650839	BRCA_chr21	1	5	1	17	0.2	Non-promiscuous	Non-aggregation prone
PFKL_DDB1	PFKL	DDB1	0.141064	0.151185	0.278074	0.00407657	BRCA_chr21	1	28	1	17	0.0357143	Non-promiscuous	Non-aggregation prone
PFKL_DDX23	PFKL	DDX23	0.259807	0.00743981	-0.40112	2.22977e-05	BRCA_chr21	1	3	1	17	0.333333	Non-promiscuous	Non-aggregation prone
PFKL_EEF1A1	PFKL	EEF1A1	-0.00952727	0.923156	0.443282	2.18295e-06	BRCA_chr21	1	2	1	17	0.5	Non-promiscuous	Non-aggregation prone
PFKL_EEF1G	PFKL	EEF1G	-0.133973	0.173031	0.382324	5.70293e-05	BRCA_chr21	1	1	1	17	1	Non-promiscuous	Non-aggregation prone
PFKL_EFTUD2	PFKL	EFTUD2	0.026384	0.789342	0.305256	0.00154319	BRCA_chr21	1	4	1	17	0.25	Non-promiscuous	Non-aggregation prone
PFKL_HNRNPU	PFKL	HNRNPU	0.134408	0.171626	0.236896	0.0149683	BRCA_chr21	1	10	1	17	0.1	Non-promiscuous	Non-aggregation prone
PFKL_HSPA5	PFKL	HSPA5	0.124342	0.206308	0.193749	0.0476613	BRCA_chr21	1	8	1	17	0.125	Non-promiscuous	Non-aggregation prone
PFKL_MATR3	PFKL	MATR3	-0.0155712	0.874727	-0.315053	0.00106236	BRCA_chr21	1	3	1	17	0.333333	Non-promiscuous	Non-aggregation prone
PFKL_MSH2	PFKL	MSH2	0.203535	0.0372968	0.0989218	0.315389	BRCA_chr21	1	21	1	17	0.047619	Non-promiscuous	Non-aggregation prone
PFKL_PRPF8	PFKL	PRPF8	-0.00666598	0.946192	-0.0131972	0.893705	BRCA_chr21	1	6	1	17	0.166667	Non-promiscuous	Non-aggregation prone
PFKL_SFPQ	PFKL	SFPQ	0.161383	0.100034	-0.313166	0.00114269	BRCA_chr21	1	8	1	17	0.125	Non-promiscuous	Non-aggregation prone
PFKL_SNRNP200	PFKL	SNRNP200	0.187352	0.0556468	0.265115	0.0062724	BRCA_chr21	1	3	1	17	0.333333	Non-promiscuous	Non-aggregation prone
PFKL_SNW1	PFKL	SNW1	0.0230666	0.815324	-0.339913	0.000388727	BRCA_chr21	1	4	1	17	0.25	Non-promiscuous	Non-aggregation prone
PFKL_TUBB	PFKL	TUBB	0.296527	0.00212973	0.414472	1.10458e-05	BRCA_chr21	1	5	1	17	0.2	Non-promiscuous	Non-aggregation prone
PFKL_UBR5	PFKL	UBR5	0.122828	0.211928	-0.0505909	0.608283	BRCA_chr21	1	2	1	17	0.5	Non-promiscuous	Non-aggregation prone
PIGT_GPAA1	PIGT	GPAA1	0.142391	0.147338	0.509392	2.86703e-08	BRCA_chr20	1	1	1	4	1	Non-promiscuous	Non-aggregation prone
PIGT_PIGK	PIGT	PIGK	0.506901	4.04222e-09	0.667364	2.22045e-16	OV_chr20	1	1	1	4	1	Non-promiscuous	Non-aggregation prone
PIGT_PIGS	PIGT	PIGS	0.506288	4.24935e-09	0.662875	4.44089e-16	OV_chr20	1	1	1	4	1	Non-promiscuous	Non-aggregation prone
PLCG1_CBL	PLCG1	CBL	0.246765	0.0111584	0.267126	0.00587443	BRCA_chr20	2	23	9	13	0.0869565	Promiscuous	Non-aggregation prone
PLCG1_FYN	PLCG1	FYN	0.225389	0.0207925	0.0540639	0.583857	BRCA_chr20	1	16	9	13	0.0625	Promiscuous	Non-aggregation prone
PLCG1_GRB2	PLCG1	GRB2	-0.262583	0.0134523	-0.0780459	0.469821	COREAD_chr20	2	23	9	13	0.0869565	Promiscuous	Non-aggregation prone
PLCG1_KHDRBS1	PLCG1	KHDRBS1	-0.287908	0.0065272	-0.0482025	0.655616	COREAD_chr20	1	12	9	13	0.0833333	Promiscuous	Non-aggregation prone
PLCG1_LCK	PLCG1	LCK	-0.379627	0.000264435	0.0390603	0.717862	COREAD_chr20	1	15	9	13	0.0666667	Promiscuous	Non-aggregation prone
PLCG1_LCP2	PLCG1	LCP2	0.227234	0.0197446	0.0241447	0.806856	BRCA_chr20	5	14	9	13	0.357143	Promiscuous	Non-aggregation prone
PLCG1_PDGFRA	PLCG1	PDGFRA	0.125171	0.203274	-0.0148882	0.881933	BRCA_chr20	1	12	9	13	0.0833333	Promiscuous	Non-aggregation prone
PLCG1_PIK3R1	PLCG1	PIK3R1	0.110264	0.30645	-0.113556	0.292142	COREAD_chr20	3	17	9	13	0.176471	Promiscuous	Non-aggregation prone
PLCG1_SOS1	PLCG1	SOS1	0.290877	0.00260992	0.225036	0.020998	BRCA_chr20	2	17	9	13	0.117647	Promiscuous	Non-aggregation prone
PLCG1_VAV1	PLCG1	VAV1	0.199222	0.0416042	0.142888	0.145914	BRCA_chr20	2	10	9	13	0.2	Promiscuous	Non-aggregation prone
PLOD3_COLGALT1	PLOD3	COLGALT1	0.332799	0.00153429	0.263722	0.0130398	COREAD_chr7	1	1	1	2	1	Non-promiscuous	Non-aggregation prone
POT1_ACD	POT1	ACD	0.28276	0.00347087	0.0998637	0.317968	BRCA_chr7	5	7	7	7	0.714286	Promiscuous	Non-aggregation prone
POT1_RAD50	POT1	RAD50	0.553359	9.24505e-10	0.0106365	0.914241	BRCA_chr7	1	34	7	7	0.0294118	Promiscuous	Non-aggregation prone
POT1_TERF1	POT1	TERF1	0.255806	0.00844292	-0.0405932	0.691471	BRCA_chr7	5	10	7	7	0.5	Promiscuous	Non-aggregation prone
POT1_TERF2	POT1	TERF2	0.39661	2.80787e-05	0.111476	0.257571	BRCA_chr7	6	15	7	7	0.4	Promiscuous	Non-aggregation prone
POT1_TERF2IP	POT1	TERF2IP	0.362876	0.000142157	0.0671677	0.496001	BRCA_chr7	5	10	7	7	0.5	Promiscuous	Non-aggregation prone
POT1_TINF2	POT1	TINF2	0.285248	0.00318323	0.126598	0.204823	BRCA_chr7	7	9	7	7	0.777778	Promiscuous	Non-aggregation prone
POT1_TNKS	POT1	TNKS	0.464514	5.98808e-07	0.0267883	0.78619	BRCA_chr7	1	9	7	7	0.111111	Promiscuous	Non-aggregation prone
PPIA_AIFM1	PPIA	AIFM1	-0.195008	0.0335634	0.115938	0.209253	OV_chr7	1	1	1	1	1	Non-promiscuous	Non-aggregation prone
PPP1R12A_MPRIP	PPP1R12A	MPRIP	0.426592	1.31364e-06	0.450135	2.8028e-07	OV_chr12	2	3	2	2	0.666667	Non-promiscuous	Non-aggregation prone
PPP1R12A_RHOA	PPP1R12A	RHOA	0.0579761	0.531121	0.21581	0.0184131	OV_chr12	1	6	2	2	0.166667	Non-promiscuous	Non-aggregation prone
PPP2CB_PIN1	PPP2CB	PIN1	-0.0968793	0.369224	0.382596	0.000234377	COREAD_chr8	1	2	1	4	0.5	Non-promiscuous	Non-aggregation prone
PPP2CB_PPP2R1A	PPP2CB	PPP2R1A	-0.176605	0.0997676	0.354336	0.000706502	COREAD_chr8	1	10	1	4	0.1	Non-promiscuous	Non-aggregation prone
PRKAR2A_DNM1L	PRKAR2A	DNM1L	0.388997	1.23031e-05	0.0376727	0.684179	OV_chr3	1	9	7	12	0.111111	Promiscuous	Non-aggregation prone
PRKAR2A_PPP1CA	PRKAR2A	PPP1CA	-0.00496368	0.957273	-0.143156	0.120381	OV_chr3	1	10	7	12	0.1	Promiscuous	Non-aggregation prone
PRKAR2A_PPP3CA	PRKAR2A	PPP3CA	0.153326	0.0959545	-0.137666	0.135432	OV_chr3	1	11	7	12	0.0909091	Promiscuous	Non-aggregation prone
PRKAR2A_PRKACA	PRKAR2A	PRKACA	0.254095	0.00529511	0.308681	0.000636472	OV_chr3	1	8	7	12	0.125	Promiscuous	Non-aggregation prone
PRKAR2A_PRKAR2B	PRKAR2A	PRKAR2B	0.173344	0.0593891	0.357634	6.52308e-05	OV_chr3	1	9	7	12	0.111111	Promiscuous	Non-aggregation prone
PRPF6_ACIN1	PRPF6	ACIN1	0.466038	9.22713e-08	0.497935	8.31955e-09	OV_chr20	1	3	2	162	0.333333	Non-promiscuous	Aggregation prone
PRPF6_ALYREF	PRPF6	ALYREF	-0.0964962	0.296496	0.399537	6.75181e-06	OV_chr20	2	6	2	162	0.333333	Non-promiscuous	Aggregation prone
PRPF6_AQR	PRPF6	AQR	0.385864	1.46482e-05	0.302087	0.00084094	OV_chr20	2	2	2	162	1	Non-promiscuous	Aggregation prone
PRPF6_BCAS2	PRPF6	BCAS2	-0.0325381	0.725367	0.412548	3.12775e-06	OV_chr20	1	4	2	162	0.25	Non-promiscuous	Aggregation prone
PRPF6_BUD13	PRPF6	BUD13	0.324021	0.000324606	0.160674	0.126013	OV_chr20	1	2	2	162	0.5	Non-promiscuous	Aggregation prone
PRPF6_BUD31	PRPF6	BUD31	-0.0941817	0.308287	0.368737	3.68555e-05	OV_chr20	1	2	2	162	0.5	Non-promiscuous	Aggregation prone
PRPF6_CACTIN	PRPF6	CACTIN	0.453482	2.22871e-07	0.151773	0.216636	OV_chr20	2	2	2	162	1	Non-promiscuous	Aggregation prone
PRPF6_CD2BP2	PRPF6	CD2BP2	0.393206	9.70556e-06	0.593843	5.15721e-12	OV_chr20	1	2	2	162	0.5	Non-promiscuous	Aggregation prone
PRPF6_CDC40	PRPF6	CDC40	0.261181	0.00411712	0.120478	0.197664	OV_chr20	2	2	2	162	1	Non-promiscuous	Aggregation prone
PRPF6_CDC5L	PRPF6	CDC5L	0.462548	1.18319e-07	0.447329	3.39015e-07	OV_chr20	2	5	2	162	0.4	Non-promiscuous	Aggregation prone
PRPF6_CDK12	PRPF6	CDK12	0.575061	7.92744e-12	0.232222	0.0141852	OV_chr20	1	2	2	162	0.5	Non-promiscuous	Aggregation prone
PRPF6_CFAP20	PRPF6	CFAP20	0.0904501	0.327933	0.12019	0.21534	OV_chr20	1	2	2	162	0.5	Non-promiscuous	Aggregation prone
PRPF6_CIRBP	PRPF6	CIRBP	0.327966	0.000271401	0.256552	0.0048564	OV_chr20	1	2	2	162	0.5	Non-promiscuous	Aggregation prone
PRPF6_CPSF6	PRPF6	CPSF6	0.484026	2.44836e-08	0.513175	2.40887e-09	OV_chr20	1	6	2	162	0.166667	Non-promiscuous	Aggregation prone
PRPF6_CWC15	PRPF6	CWC15	-0.124441	0.177527	0.383115	1.7046e-05	OV_chr20	2	3	2	162	0.666667	Non-promiscuous	Aggregation prone
PRPF6_CWC22	PRPF6	CWC22	0.283984	0.00174866	0.18711	0.0492514	OV_chr20	2	2	2	162	1	Non-promiscuous	Aggregation prone
PRPF6_CWC27	PRPF6	CWC27	0.178714	0.0518176	0.365532	4.35521e-05	OV_chr20	1	2	2	162	0.5	Non-promiscuous	Aggregation prone
PRPF6_DDX17	PRPF6	DDX17	0.373067	2.93301e-05	0.440293	5.42239e-07	OV_chr20	1	4	2	162	0.25	Non-promiscuous	Aggregation prone
PRPF6_DDX23	PRPF6	DDX23	0.439382	5.75814e-07	0.760818	0	OV_chr20	2	3	2	162	0.666667	Non-promiscuous	Aggregation prone
PRPF6_DDX39B	PRPF6	DDX39B	0.284781	0.00169483	0.232994	0.0107713	OV_chr20	1	4	2	162	0.25	Non-promiscuous	Aggregation prone
PRPF6_DDX3X	PRPF6	DDX3X	0.350185	9.45719e-05	-0.0223615	0.809253	OV_chr20	1	4	2	162	0.25	Non-promiscuous	Aggregation prone
PRPF6_DDX41	PRPF6	DDX41	0.202008	0.0275838	0.128539	0.187008	OV_chr20	2	2	2	162	1	Non-promiscuous	Aggregation prone
PRPF6_DDX46	PRPF6	DDX46	0.374897	2.66049e-05	0.366956	4.04463e-05	OV_chr20	1	3	2	162	0.333333	Non-promiscuous	Aggregation prone
PRPF6_DDX5	PRPF6	DDX5	0.123914	0.179384	0.304971	0.000745066	OV_chr20	2	6	2	162	0.333333	Non-promiscuous	Aggregation prone
PRPF6_DHX15	PRPF6	DHX15	0.459999	1.41644e-07	0.382923	1.72268e-05	OV_chr20	1	6	2	162	0.166667	Non-promiscuous	Aggregation prone
PRPF6_DHX16	PRPF6	DHX16	0.389695	1.18313e-05	0.244766	0.00730017	OV_chr20	1	3	2	162	0.333333	Non-promiscuous	Aggregation prone
PRPF6_DHX38	PRPF6	DHX38	0.603133	3.90576e-13	0.00263495	0.977311	OV_chr20	2	3	2	162	0.666667	Non-promiscuous	Aggregation prone
PRPF6_DHX8	PRPF6	DHX8	0.467191	8.49373e-08	0.267947	0.00428617	OV_chr20	2	2	2	162	1	Non-promiscuous	Aggregation prone
PRPF6_DHX9	PRPF6	DHX9	0.613759	1.15463e-13	0.520019	1.35314e-09	OV_chr20	1	10	2	162	0.1	Non-promiscuous	Aggregation prone
PRPF6_DNAJC8	PRPF6	DNAJC8	-0.0894816	0.33316	0.323971	0.000325336	OV_chr20	1	3	2	162	0.333333	Non-promiscuous	Aggregation prone
PRPF6_EFTUD2	PRPF6	EFTUD2	0.381684	1.84362e-05	0.778443	0	OV_chr20	2	4	2	162	0.5	Non-promiscuous	Aggregation prone
PRPF6_EIF4A3	PRPF6	EIF4A3	0.109806	0.234518	0.446938	3.48093e-07	OV_chr20	2	11	2	162	0.181818	Non-promiscuous	Aggregation prone
PRPF6_FRG1	PRPF6	FRG1	-0.0260219	0.778774	0.103561	0.26237	OV_chr20	1	2	2	162	0.5	Non-promiscuous	Aggregation prone
PRPF6_GPATCH1	PRPF6	GPATCH1	0.518751	1.50714e-09	0.271479	0.0124907	OV_chr20	1	2	2	162	0.5	Non-promiscuous	Aggregation prone
PRPF6_HNRNPA1	PRPF6	HNRNPA1	0.339838	0.000156051	0.54436	1.5629e-10	OV_chr20	1	3	2	162	0.333333	Non-promiscuous	Aggregation prone
PRPF6_HNRNPA2B1	PRPF6	HNRNPA2B1	0.364058	4.70009e-05	0.378486	2.19362e-05	OV_chr20	1	3	2	162	0.333333	Non-promiscuous	Aggregation prone
PRPF6_HNRNPA3	PRPF6	HNRNPA3	0.349772	9.65139e-05	0.374448	2.725e-05	OV_chr20	1	2	2	162	0.5	Non-promiscuous	Aggregation prone
PRPF6_HNRNPC	PRPF6	HNRNPC	0.289674	0.0013963	0.509714	3.20915e-09	OV_chr20	1	4	2	162	0.25	Non-promiscuous	Aggregation prone
PRPF6_HNRNPF	PRPF6	HNRNPF	0.191711	0.0367387	0.214592	0.0190995	OV_chr20	1	4	2	162	0.25	Non-promiscuous	Aggregation prone
PRPF6_HNRNPH1	PRPF6	HNRNPH1	0.344417	0.000125298	0.459258	1.49204e-07	OV_chr20	1	7	2	162	0.142857	Non-promiscuous	Aggregation prone
PRPF6_HNRNPK	PRPF6	HNRNPK	0.448675	3.09511e-07	0.491433	1.38627e-08	OV_chr20	1	4	2	162	0.25	Non-promiscuous	Aggregation prone
PRPF6_HNRNPM	PRPF6	HNRNPM	0.463545	1.10236e-07	0.414421	2.7923e-06	OV_chr20	1	4	2	162	0.25	Non-promiscuous	Aggregation prone
PRPF6_HNRNPR	PRPF6	HNRNPR	0.476485	4.30997e-08	0.530024	5.68849e-10	OV_chr20	1	4	2	162	0.25	Non-promiscuous	Aggregation prone
PRPF6_HNRNPU	PRPF6	HNRNPU	0.510526	3.00118e-09	0.489268	1.63932e-08	OV_chr20	1	11	2	162	0.0909091	Non-promiscuous	Aggregation prone
PRPF6_HTATSF1	PRPF6	HTATSF1	0.5143	2.19287e-09	0.170403	0.0639064	OV_chr20	1	3	2	162	0.333333	Non-promiscuous	Aggregation prone
PRPF6_IGF2BP3	PRPF6	IGF2BP3	0.169705	0.0650184	0.139923	0.129078	OV_chr20	1	2	2	162	0.5	Non-promiscuous	Aggregation prone
PRPF6_IK	PRPF6	IK	0.352834	8.29569e-05	0.402891	5.55398e-06	OV_chr20	1	2	2	162	0.5	Non-promiscuous	Aggregation prone
PRPF6_ISY1	PRPF6	ISY1	0.225851	0.0135212	0.425438	3.99648e-06	OV_chr20	2	2	2	162	1	Non-promiscuous	Aggregation prone
PRPF6_LSM2	PRPF6	LSM2	-0.00753454	0.935183	0.347764	0.000106497	OV_chr20	2	5	2	162	0.4	Non-promiscuous	Aggregation prone
PRPF6_LSM3	PRPF6	LSM3	-0.323764	0.000328377	0.273915	0.00268721	OV_chr20	2	4	2	162	0.5	Non-promiscuous	Aggregation prone
PRPF6_LSM4	PRPF6	LSM4	0.020987	0.820774	0.353212	9.37448e-05	OV_chr20	1	4	2	162	0.25	Non-promiscuous	Aggregation prone
PRPF6_LSM6	PRPF6	LSM6	-0.144979	0.11568	0.315112	0.000482037	OV_chr20	1	4	2	162	0.25	Non-promiscuous	Aggregation prone
PRPF6_LSM7	PRPF6	LSM7	-0.227005	0.0130394	0.452409	6.98152e-07	OV_chr20	1	4	2	162	0.25	Non-promiscuous	Aggregation prone
PRPF6_LUC7L3	PRPF6	LUC7L3	0.115831	0.209676	0.493598	1.17092e-08	OV_chr20	1	2	2	162	0.5	Non-promiscuous	Aggregation prone
PRPF6_MAGOH	PRPF6	MAGOH	-0.143263	0.120101	0.468687	7.62563e-08	OV_chr20	2	12	2	162	0.166667	Non-promiscuous	Aggregation prone
PRPF6_MFAP1	PRPF6	MFAP1	0.400783	6.28079e-06	0.435538	9.21151e-07	OV_chr20	1	2	2	162	0.5	Non-promiscuous	Aggregation prone
PRPF6_MOV10	PRPF6	MOV10	0.286284	0.0015975	0.149843	0.103835	OV_chr20	1	4	2	162	0.25	Non-promiscuous	Aggregation prone
PRPF6_NCBP1	PRPF6	NCBP1	0.266565	0.00338528	0.251289	0.00583907	OV_chr20	1	8	2	162	0.125	Non-promiscuous	Aggregation prone
PRPF6_NCBP2	PRPF6	NCBP2	0.179811	0.0503737	0.27804	0.00262427	OV_chr20	1	7	2	162	0.142857	Non-promiscuous	Aggregation prone
PRPF6_NUDT21	PRPF6	NUDT21	0.325438	0.000304474	0.417818	2.26903e-06	OV_chr20	1	6	2	162	0.166667	Non-promiscuous	Aggregation prone
PRPF6_PABPC1	PRPF6	PABPC1	0.215475	0.0185996	0.0374804	0.685706	OV_chr20	2	6	2	162	0.333333	Non-promiscuous	Aggregation prone
PRPF6_PAXBP1	PRPF6	PAXBP1	0.263331	0.00380928	0.364728	7.13556e-05	OV_chr20	1	2	2	162	0.5	Non-promiscuous	Aggregation prone
PRPF6_PLRG1	PRPF6	PLRG1	0.237694	0.00924162	0.385992	1.45446e-05	OV_chr20	2	4	2	162	0.5	Non-promiscuous	Aggregation prone
PRPF6_PNN	PRPF6	PNN	0.292572	0.00124287	0.515461	1.9896e-09	OV_chr20	1	2	2	162	0.5	Non-promiscuous	Aggregation prone
PRPF6_PPIE	PRPF6	PPIE	0.014129	0.878784	0.195941	0.0327082	OV_chr20	2	2	2	162	1	Non-promiscuous	Aggregation prone
PRPF6_PPIH	PRPF6	PPIH	-0.196931	0.031821	0.237829	0.00920057	OV_chr20	1	2	2	162	0.5	Non-promiscuous	Aggregation prone
PRPF6_PPIL1	PRPF6	PPIL1	0.158909	0.0843148	0.316137	0.000460873	OV_chr20	2	2	2	162	1	Non-promiscuous	Aggregation prone
PRPF6_PPIL2	PRPF6	PPIL2	0.323935	0.000325858	0.0243786	0.820603	OV_chr20	1	2	2	162	0.5	Non-promiscuous	Aggregation prone
PRPF6_PPIL3	PRPF6	PPIL3	-0.132866	0.149729	-0.0639012	0.489925	OV_chr20	2	2	2	162	1	Non-promiscuous	Aggregation prone
PRPF6_PPM1G	PRPF6	PPM1G	0.305626	0.000724733	0.339368	0.000159576	OV_chr20	1	2	2	162	0.5	Non-promiscuous	Aggregation prone
PRPF6_PPWD1	PRPF6	PPWD1	0.318288	0.00041924	0.250998	0.0073282	OV_chr20	2	2	2	162	1	Non-promiscuous	Aggregation prone
PRPF6_PRPF18	PRPF6	PRPF18	-0.00803304	0.930905	0.0938525	0.376224	OV_chr20	1	2	2	162	0.5	Non-promiscuous	Aggregation prone
PRPF6_PRPF19	PRPF6	PRPF19	0.432182	9.1985e-07	0.549452	9.73208e-11	OV_chr20	2	4	2	162	0.5	Non-promiscuous	Aggregation prone
PRPF6_PRPF3	PRPF6	PRPF3	0.406573	4.47137e-06	0.476115	4.42978e-08	OV_chr20	1	2	2	162	0.5	Non-promiscuous	Aggregation prone
PRPF6_PRPF31	PRPF6	PRPF31	0.34191	0.000141354	0.457656	1.66898e-07	OV_chr20	1	3	2	162	0.333333	Non-promiscuous	Aggregation prone
PRPF6_PRPF4	PRPF6	PRPF4	0.126777	0.169465	0.457328	1.70754e-07	OV_chr20	1	2	2	162	0.5	Non-promiscuous	Aggregation prone
PRPF6_PRPF40A	PRPF6	PRPF40A	0.297636	0.00101123	0.414984	2.69839e-06	OV_chr20	1	2	2	162	0.5	Non-promiscuous	Aggregation prone
PRPF6_PRPF4B	PRPF6	PRPF4B	0.250178	0.00606783	0.272226	0.00274382	OV_chr20	2	2	2	162	1	Non-promiscuous	Aggregation prone
PRPF6_PRPF8	PRPF6	PRPF8	0.516237	1.86391e-09	0.79008	0	OV_chr20	2	6	2	162	0.333333	Non-promiscuous	Aggregation prone
PRPF6_PUF60	PRPF6	PUF60	0.31133	0.000568046	0.233307	0.0106628	OV_chr20	1	3	2	162	0.333333	Non-promiscuous	Aggregation prone
PRPF6_RBM15	PRPF6	RBM15	0.45329	2.2584e-07	0.243156	0.00770708	OV_chr20	1	2	2	162	0.5	Non-promiscuous	Aggregation prone
PRPF6_RBM17	PRPF6	RBM17	0.223216	0.0146804	0.482232	2.80451e-08	OV_chr20	1	3	2	162	0.333333	Non-promiscuous	Aggregation prone
PRPF6_RBM22	PRPF6	RBM22	0.353881	7.87454e-05	0.334988	0.000196166	OV_chr20	2	2	2	162	1	Non-promiscuous	Aggregation prone
PRPF6_RBM25	PRPF6	RBM25	0.129761	0.159565	0.381769	1.83503e-05	OV_chr20	1	2	2	162	0.5	Non-promiscuous	Aggregation prone
PRPF6_RBM8A	PRPF6	RBM8A	0.408425	4.00555e-06	0.403532	5.34924e-06	OV_chr20	2	15	2	162	0.133333	Non-promiscuous	Aggregation prone
PRPF6_RBMX	PRPF6	RBMX	0.220866	0.0157862	0.53486	3.70406e-10	OV_chr20	1	3	2	162	0.333333	Non-promiscuous	Aggregation prone
PRPF6_RNPS1	PRPF6	RNPS1	0.314677	0.000491268	0.397742	7.48898e-06	OV_chr20	1	7	2	162	0.142857	Non-promiscuous	Aggregation prone
PRPF6_SART1	PRPF6	SART1	0.401681	5.96106e-06	0.57657	6.79146e-12	OV_chr20	2	2	2	162	1	Non-promiscuous	Aggregation prone
PRPF6_SF1	PRPF6	SF1	0.576122	7.11142e-12	0.417191	2.35798e-06	OV_chr20	1	2	2	162	0.5	Non-promiscuous	Aggregation prone
PRPF6_SF3A1	PRPF6	SF3A1	0.41383	2.8943e-06	0.560184	3.49214e-11	OV_chr20	2	5	2	162	0.4	Non-promiscuous	Aggregation prone
PRPF6_SF3A2	PRPF6	SF3A2	0.260924	0.00415526	0.269634	0.00302251	OV_chr20	2	4	2	162	0.5	Non-promiscuous	Aggregation prone
PRPF6_SF3A3	PRPF6	SF3A3	0.297308	0.00102493	0.486234	2.06945e-08	OV_chr20	2	4	2	162	0.5	Non-promiscuous	Aggregation prone
PRPF6_SF3B1	PRPF6	SF3B1	0.408247	4.04826e-06	0.521037	1.24049e-09	OV_chr20	2	8	2	162	0.25	Non-promiscuous	Aggregation prone
PRPF6_SF3B2	PRPF6	SF3B2	0.540578	2.21055e-10	0.420175	1.96211e-06	OV_chr20	2	6	2	162	0.333333	Non-promiscuous	Aggregation prone
PRPF6_SF3B3	PRPF6	SF3B3	0.504643	4.8574e-09	0.471044	6.42716e-08	OV_chr20	2	14	2	162	0.142857	Non-promiscuous	Aggregation prone
PRPF6_SF3B4	PRPF6	SF3B4	0.438043	6.28734e-07	0.317868	0.000427091	OV_chr20	1	6	2	162	0.166667	Non-promiscuous	Aggregation prone
PRPF6_SF3B6	PRPF6	SF3B6	-0.1025	0.267317	0.527012	7.40615e-10	OV_chr20	1	5	2	162	0.2	Non-promiscuous	Aggregation prone
PRPF6_SLU7	PRPF6	SLU7	0.133592	0.147495	0.193474	0.0631466	OV_chr20	2	2	2	162	1	Non-promiscuous	Aggregation prone
PRPF6_SMNDC1	PRPF6	SMNDC1	0.106609	0.248508	0.285949	0.00161873	OV_chr20	1	3	2	162	0.333333	Non-promiscuous	Aggregation prone
PRPF6_SMU1	PRPF6	SMU1	0.104978	0.255861	0.266379	0.00340836	OV_chr20	1	2	2	162	0.5	Non-promiscuous	Aggregation prone
PRPF6_SNRNP200	PRPF6	SNRNP200	0.612982	1.26565e-13	0.761266	0	OV_chr20	2	3	2	162	0.666667	Non-promiscuous	Aggregation prone
PRPF6_SNRNP27	PRPF6	SNRNP27	-0.127197	0.168044	0.195219	0.060758	OV_chr20	1	2	2	162	0.5	Non-promiscuous	Aggregation prone
PRPF6_SNRNP40	PRPF6	SNRNP40	0.146268	0.112443	0.506922	4.03517e-09	OV_chr20	2	3	2	162	0.666667	Non-promiscuous	Aggregation prone
PRPF6_SNRNP70	PRPF6	SNRNP70	0.284952	0.0016835	0.511523	2.76347e-09	OV_chr20	1	3	2	162	0.333333	Non-promiscuous	Aggregation prone
PRPF6_SNRPA	PRPF6	SNRPA	0.196745	0.0319854	0.520745	1.27183e-09	OV_chr20	1	6	2	162	0.166667	Non-promiscuous	Aggregation prone
PRPF6_SNRPA1	PRPF6	SNRPA1	-0.148412	0.107217	0.446332	3.62578e-07	OV_chr20	2	5	2	162	0.4	Non-promiscuous	Aggregation prone
PRPF6_SNRPC	PRPF6	SNRPC	0.0686227	0.458355	0.41586	2.5581e-06	OV_chr20	1	2	2	162	0.5	Non-promiscuous	Aggregation prone
PRPF6_SNRPD1	PRPF6	SNRPD1	-0.132339	0.151365	0.474064	5.15322e-08	OV_chr20	2	17	2	162	0.117647	Non-promiscuous	Aggregation prone
PRPF6_SNRPD2	PRPF6	SNRPD2	-0.241561	0.00813006	0.561088	3.1978e-11	OV_chr20	2	13	2	162	0.153846	Non-promiscuous	Aggregation prone
PRPF6_SNRPD3	PRPF6	SNRPD3	0.0540664	0.559223	0.439382	5.75814e-07	OV_chr20	2	16	2	162	0.125	Non-promiscuous	Aggregation prone
PRPF6_SNRPE	PRPF6	SNRPE	-0.119506	0.19548	0.141706	0.129176	OV_chr20	2	12	2	162	0.166667	Non-promiscuous	Aggregation prone
PRPF6_SNRPF	PRPF6	SNRPF	-0.146731	0.111298	0.456049	2.68045e-07	OV_chr20	2	11	2	162	0.181818	Non-promiscuous	Aggregation prone
PRPF6_SNRPG	PRPF6	SNRPG	-0.307278	0.000675699	0.5344	5.44678e-10	OV_chr20	2	11	2	162	0.181818	Non-promiscuous	Aggregation prone
PRPF6_SNU13	PRPF6	SNU13	-0.234796	0.0101605	0.343484	0.000131064	OV_chr20	1	3	2	162	0.333333	Non-promiscuous	Aggregation prone
PRPF6_SNW1	PRPF6	SNW1	0.361451	5.37317e-05	0.507812	3.7518e-09	OV_chr20	2	4	2	162	0.5	Non-promiscuous	Aggregation prone
PRPF6_SPEN	PRPF6	SPEN	0.458909	1.52898e-07	0.226512	0.0207666	OV_chr20	1	7	2	162	0.142857	Non-promiscuous	Aggregation prone
PRPF6_SRRM1	PRPF6	SRRM1	0.340414	0.000151823	0.284112	0.00173991	OV_chr20	2	9	2	162	0.222222	Non-promiscuous	Aggregation prone
PRPF6_SRRM2	PRPF6	SRRM2	0.45747	1.69068e-07	0.139496	0.130263	OV_chr20	2	4	2	162	0.5	Non-promiscuous	Aggregation prone
PRPF6_SRRT	PRPF6	SRRT	0.416344	2.48354e-06	0.59327	1.16285e-12	OV_chr20	1	3	2	162	0.333333	Non-promiscuous	Aggregation prone
PRPF6_SRSF1	PRPF6	SRSF1	0.452386	2.40318e-07	0.565012	2.17568e-11	OV_chr20	2	5	2	162	0.4	Non-promiscuous	Aggregation prone
PRPF6_SRSF11	PRPF6	SRSF11	0.218851	0.0167915	0.339289	0.00016017	OV_chr20	1	2	2	162	0.5	Non-promiscuous	Aggregation prone
PRPF6_SRSF2	PRPF6	SRSF2	-0.0076556	0.934144	0.359771	5.8539e-05	OV_chr20	1	3	2	162	0.333333	Non-promiscuous	Aggregation prone
PRPF6_SRSF3	PRPF6	SRSF3	0.109849	0.234335	0.521799	1.16216e-09	OV_chr20	1	2	2	162	0.5	Non-promiscuous	Aggregation prone
PRPF6_SRSF4	PRPF6	SRSF4	0.257072	0.00476784	0.36576	4.30406e-05	OV_chr20	1	3	2	162	0.333333	Non-promiscuous	Aggregation prone
PRPF6_SRSF5	PRPF6	SRSF5	0.20841	0.0229342	0.360162	5.7384e-05	OV_chr20	1	3	2	162	0.333333	Non-promiscuous	Aggregation prone
PRPF6_SRSF7	PRPF6	SRSF7	0.1454	0.114617	0.359735	5.8645e-05	OV_chr20	1	3	2	162	0.333333	Non-promiscuous	Aggregation prone
PRPF6_SRSF9	PRPF6	SRSF9	0.233151	0.0107169	0.476271	4.37871e-08	OV_chr20	1	4	2	162	0.25	Non-promiscuous	Aggregation prone
PRPF6_SYF2	PRPF6	SYF2	0.131505	0.15398	0.0322637	0.76539	OV_chr20	2	2	2	162	1	Non-promiscuous	Aggregation prone
PRPF6_SYNCRIP	PRPF6	SYNCRIP	0.284098	0.00174088	0.241298	0.00820187	OV_chr20	1	5	2	162	0.2	Non-promiscuous	Aggregation prone
PRPF6_TCERG1	PRPF6	TCERG1	0.290721	0.001339	0.312434	0.000541585	OV_chr20	1	2	2	162	0.5	Non-promiscuous	Aggregation prone
PRPF6_TFIP11	PRPF6	TFIP11	0.4167	2.43003e-06	0.307702	0.000965718	OV_chr20	2	5	2	162	0.4	Non-promiscuous	Aggregation prone
PRPF6_THOC1	PRPF6	THOC1	0.202614	0.0271123	0.399046	6.94653e-06	OV_chr20	1	5	2	162	0.2	Non-promiscuous	Aggregation prone
PRPF6_THOC2	PRPF6	THOC2	0.254544	0.00521245	0.422183	1.73209e-06	OV_chr20	1	5	2	162	0.2	Non-promiscuous	Aggregation prone
PRPF6_THOC5	PRPF6	THOC5	0.122917	0.182936	0.28229	0.00213973	OV_chr20	1	5	2	162	0.2	Non-promiscuous	Aggregation prone
PRPF6_THOC6	PRPF6	THOC6	0.0862342	0.351072	0.278486	0.00216389	OV_chr20	1	5	2	162	0.2	Non-promiscuous	Aggregation prone
PRPF6_THOC7	PRPF6	THOC7	-0.20349	0.0264421	0.12581	0.182276	OV_chr20	1	5	2	162	0.2	Non-promiscuous	Aggregation prone
PRPF6_TRA2B	PRPF6	TRA2B	0.260939	0.00415313	0.569164	1.43952e-11	OV_chr20	1	4	2	162	0.25	Non-promiscuous	Aggregation prone
PRPF6_TXNL4A	PRPF6	TXNL4A	0.0678322	0.463561	0.350409	0.000215504	OV_chr20	1	2	2	162	0.5	Non-promiscuous	Aggregation prone
PRPF6_U2AF1	PRPF6	U2AF1	0.127254	0.167852	0.465767	9.40772e-08	OV_chr20	2	5	2	162	0.4	Non-promiscuous	Aggregation prone
PRPF6_U2AF2	PRPF6	U2AF2	0.372525	3.01849e-05	0.436896	6.77701e-07	OV_chr20	1	5	2	162	0.2	Non-promiscuous	Aggregation prone
PRPF6_U2SURP	PRPF6	U2SURP	0.282246	0.00187133	0.504636	4.8602e-09	OV_chr20	1	3	2	162	0.333333	Non-promiscuous	Aggregation prone
PRPF6_USP39	PRPF6	USP39	0.383386	1.67945e-05	0.699167	0	OV_chr20	1	2	2	162	0.5	Non-promiscuous	Aggregation prone
PRPF6_WBP11	PRPF6	WBP11	0.259835	0.00432092	0.329925	0.000248101	OV_chr20	1	2	2	162	0.5	Non-promiscuous	Aggregation prone
PRPF6_WDR83	PRPF6	WDR83	0.158183	0.085762	0.0940171	0.5031	OV_chr20	1	2	2	162	0.5	Non-promiscuous	Aggregation prone
PRPF6_WTAP	PRPF6	WTAP	-0.0269477	0.771116	0.353525	8.0155e-05	OV_chr20	1	3	2	162	0.333333	Non-promiscuous	Aggregation prone
PRPF6_XAB2	PRPF6	XAB2	0.460689	1.34924e-07	0.273572	0.00260845	OV_chr20	2	2	2	162	1	Non-promiscuous	Aggregation prone
PRPF6_ZCCHC8	PRPF6	ZCCHC8	0.276015	0.00237808	0.315207	0.000752644	OV_chr20	1	3	2	162	0.333333	Non-promiscuous	Aggregation prone
PRPF6_ZNF207	PRPF6	ZNF207	0.419577	2.03604e-06	0.395969	8.29152e-06	OV_chr20	1	2	2	162	0.5	Non-promiscuous	Aggregation prone
PTK2_ACTN1	PTK2	ACTN1	0.0608646	0.537378	0.14238	0.147368	BRCA_chr8	1	13	12	30	0.0769231	Promiscuous	Non-aggregation prone
PTK2_BCAR1	PTK2	BCAR1	0.148352	0.13096	-0.0492121	0.618104	BRCA_chr8	3	18	12	30	0.166667	Promiscuous	Non-aggregation prone
PTK2_CD47	PTK2	CD47	0.286243	0.0030743	0.0410533	0.677548	BRCA_chr8	1	18	12	30	0.0555556	Promiscuous	Non-aggregation prone
PTK2_CDH1	PTK2	CDH1	0.348797	0.000265792	0.238296	0.0143672	BRCA_chr8	1	20	12	30	0.05	Promiscuous	Non-aggregation prone
PTK2_CTNNB1	PTK2	CTNNB1	0.31101	0.00124124	0.182542	0.0623498	BRCA_chr8	1	49	12	30	0.0204082	Promiscuous	Non-aggregation prone
PTK2_CTTN	PTK2	CTTN	0.255588	0.00850076	-0.0417582	0.672327	BRCA_chr8	1	16	12	30	0.0625	Promiscuous	Non-aggregation prone
PTK2_DIAPH1	PTK2	DIAPH1	0.0575575	0.55975	-0.15847	0.106394	BRCA_chr8	1	12	12	30	0.0833333	Promiscuous	Non-aggregation prone
PTK2_DVL2	PTK2	DVL2	0.321387	0.000828879	0.0293801	0.766072	BRCA_chr8	1	13	12	30	0.0769231	Promiscuous	Non-aggregation prone
PTK2_FER	PTK2	FER	0.34097	0.000371749	-0.289135	0.00277647	BRCA_chr8	1	12	12	30	0.0833333	Promiscuous	Non-aggregation prone
PTK2_GRB7	PTK2	GRB7	0.22712	0.019808	0.221366	0.0232434	BRCA_chr8	1	12	12	30	0.0833333	Promiscuous	Non-aggregation prone
PTK2_IQGAP1	PTK2	IQGAP1	0.141789	0.149072	0.071781	0.466815	BRCA_chr8	1	19	12	30	0.0526316	Promiscuous	Non-aggregation prone
PTK2_ITGA2B	PTK2	ITGA2B	0.155609	0.112944	-0.354833	0.0211229	BRCA_chr8	1	21	12	30	0.047619	Promiscuous	Non-aggregation prone
PTK2_ITGB3	PTK2	ITGB3	0.136554	0.164824	-0.162695	0.125495	BRCA_chr8	1	42	12	30	0.0238095	Promiscuous	Non-aggregation prone
PTK2_ITGB5	PTK2	ITGB5	-0.071553	0.468235	-0.177628	0.0698623	BRCA_chr8	2	19	12	30	0.105263	Promiscuous	Non-aggregation prone
PTK2_JUP	PTK2	JUP	0.340058	0.000386356	0.247118	0.0110397	BRCA_chr8	1	12	12	30	0.0833333	Promiscuous	Non-aggregation prone
PTK2_MAP2K1	PTK2	MAP2K1	0.197605	0.043323	0.0490773	0.619067	BRCA_chr8	1	18	12	30	0.0555556	Promiscuous	Non-aggregation prone
PTK2_MAP2K2	PTK2	MAP2K2	0.155152	0.114017	0.0108646	0.91241	BRCA_chr8	1	13	12	30	0.0769231	Promiscuous	Non-aggregation prone
PTK2_MAPK1	PTK2	MAPK1	0.29295	0.00242341	-0.0219055	0.824467	BRCA_chr8	1	21	12	30	0.047619	Promiscuous	Non-aggregation prone
PTK2_MMP14	PTK2	MMP14	0.0280531	0.776354	0.00609579	0.950789	BRCA_chr8	1	15	12	30	0.0666667	Promiscuous	Non-aggregation prone
PTK2_PXN	PTK2	PXN	0.154582	0.115368	-0.110491	0.261826	BRCA_chr8	4	18	12	30	0.222222	Promiscuous	Non-aggregation prone
PTK2_SRC	PTK2	SRC	0.272486	0.00492119	0.247616	0.010874	BRCA_chr8	2	22	12	30	0.0909091	Promiscuous	Non-aggregation prone
PTK2_TLN1	PTK2	TLN1	0.101835	0.301278	-0.0972216	0.323819	BRCA_chr8	2	13	12	30	0.153846	Promiscuous	Non-aggregation prone
PTK2_VCL	PTK2	VCL	0.163871	0.0948422	-0.0941634	0.339344	BRCA_chr8	2	12	12	30	0.166667	Promiscuous	Non-aggregation prone
PTK2_WASL	PTK2	WASL	0.275171	0.00449761	-0.13475	0.170528	BRCA_chr8	1	14	12	30	0.0714286	Promiscuous	Non-aggregation prone
PTK2B_CBL	PTK2B	CBL	-0.0176464	0.870374	0.0230152	0.83145	COREAD_chr8	1	18	3	8	0.0555556	Non-promiscuous	Non-aggregation prone
PTK2B_ITGAV	PTK2B	ITGAV	-0.166144	0.121849	0.0678395	0.529994	COREAD_chr8	1	35	3	8	0.0285714	Non-promiscuous	Non-aggregation prone
PTK2B_ITGB3	PTK2B	ITGB3	-0.000915783	0.993244	0.18263	0.0885533	COREAD_chr8	1	33	3	8	0.030303	Non-promiscuous	Non-aggregation prone
PTK2B_LCK	PTK2B	LCK	0.221179	0.038368	0.180087	0.0931592	COREAD_chr8	1	9	3	8	0.111111	Non-promiscuous	Non-aggregation prone
PTK2B_PIK3R1	PTK2B	PIK3R1	-0.116058	0.281571	0.0714484	0.508287	COREAD_chr8	1	13	3	8	0.0769231	Non-promiscuous	Non-aggregation prone
PTK2B_PXN	PTK2B	PXN	0.338435	0.00125912	0.267736	0.0116725	COREAD_chr8	1	12	3	8	0.0833333	Non-promiscuous	Non-aggregation prone
PTK2B_SORBS2	PTK2B	SORBS2	-0.134109	0.212872	0.0516264	0.632869	COREAD_chr8	1	3	3	8	0.333333	Non-promiscuous	Non-aggregation prone
PTPN11_GRB2	PTPN11	GRB2	0.360924	5.51978e-05	-0.0400513	0.6654	OV_chr12	1	20	5	9	0.05	Non-promiscuous	Non-aggregation prone
PTPN11_HOOK1	PTPN11	HOOK1	0.48778	1.83836e-08	0.10329	0.263626	OV_chr12	1	10	5	9	0.1	Non-promiscuous	Non-aggregation prone
PTPN11_JAK1	PTPN11	JAK1	0.505954	4.36681e-09	0.12745	0.192937	OV_chr12	1	5	5	9	0.2	Non-promiscuous	Non-aggregation prone
PTPN11_PIK3R1	PTPN11	PIK3R1	0.476399	4.33734e-08	0.0542867	0.567945	OV_chr12	1	15	5	9	0.0666667	Non-promiscuous	Non-aggregation prone
PTPN11_PLCG1	PTPN11	PLCG1	0.575908	7.26885e-12	-0.0228167	0.814683	OV_chr12	1	13	5	9	0.0769231	Non-promiscuous	Non-aggregation prone
RAB5A_RABEP1	RAB5A	RABEP1	0.338613	0.000165392	0.151536	0.10752	OV_chr3	1	4	3	7	0.25	Non-promiscuous	Non-aggregation prone
RAB5A_RABGEF1	RAB5A	RABGEF1	-0.0401439	0.664673	0.0596714	0.547365	OV_chr3	1	3	3	7	0.333333	Non-promiscuous	Non-aggregation prone
RAB5A_VPS11	RAB5A	VPS11	0.212185	0.0205213	0.142522	0.122049	OV_chr3	1	7	3	7	0.142857	Non-promiscuous	Non-aggregation prone
RAB5A_VPS16	RAB5A	VPS16	0.235187	0.0100318	0.149544	0.104534	OV_chr3	1	10	3	7	0.1	Non-promiscuous	Non-aggregation prone
RAB5A_VPS18	RAB5A	VPS18	0.453368	2.24626e-07	0.234276	0.0103335	OV_chr3	1	9	3	7	0.111111	Non-promiscuous	Non-aggregation prone
RAB5A_VPS39	RAB5A	VPS39	0.440649	5.29637e-07	0.0174062	0.852233	OV_chr3	1	5	3	7	0.2	Non-promiscuous	Non-aggregation prone
RALY_ALYREF	RALY	ALYREF	0.494309	8.36132e-08	0.389488	4.01387e-05	BRCA_chr20	1	7	2	94	0.142857	Non-promiscuous	Non-aggregation prone
RALY_AQR	RALY	AQR	-0.124705	0.204977	-0.160782	0.101322	BRCA_chr20	1	3	2	94	0.333333	Non-promiscuous	Non-aggregation prone
RALY_CACTIN	RALY	CACTIN	0.223243	0.0220709	-0.191509	0.0503414	BRCA_chr20	1	3	2	94	0.333333	Non-promiscuous	Non-aggregation prone
RALY_CDC40	RALY	CDC40	-0.107993	0.272833	0.236616	0.0150911	BRCA_chr20	1	3	2	94	0.333333	Non-promiscuous	Non-aggregation prone
RALY_CDC5L	RALY	CDC5L	-0.378201	0.000280109	0.518781	2.24365e-07	COREAD_chr20	1	6	2	94	0.166667	Non-promiscuous	Non-aggregation prone
RALY_CWC15	RALY	CWC15	0.192505	0.0491353	0.507205	3.35925e-08	BRCA_chr20	1	4	2	94	0.25	Non-promiscuous	Non-aggregation prone
RALY_CWC22	RALY	CWC22	0.125036	0.203765	0.732096	0	BRCA_chr20	1	3	2	94	0.333333	Non-promiscuous	Non-aggregation prone
RALY_CWC27	RALY	CWC27	-0.317231	0.00259932	-0.073792	0.494439	COREAD_chr20	1	2	2	94	0.5	Non-promiscuous	Non-aggregation prone
RALY_DDX1	RALY	DDX1	-0.294054	0.00542258	0.237797	0.0256849	COREAD_chr20	1	3	2	94	0.333333	Non-promiscuous	Non-aggregation prone
RALY_DDX17	RALY	DDX17	-0.463474	5.4307e-06	0.523525	1.66162e-07	COREAD_chr20	1	4	2	94	0.25	Non-promiscuous	Non-aggregation prone
RALY_DDX23	RALY	DDX23	0.120423	0.221082	0.433029	3.95427e-06	BRCA_chr20	1	4	2	94	0.25	Non-promiscuous	Non-aggregation prone
RALY_DDX3X	RALY	DDX3X	-0.0419656	0.670794	0.461269	7.33855e-07	BRCA_chr20	1	4	2	94	0.25	Non-promiscuous	Non-aggregation prone
RALY_DDX41	RALY	DDX41	0.465341	4.92018e-06	0.230358	0.030836	COREAD_chr20	1	3	2	94	0.333333	Non-promiscuous	Non-aggregation prone
RALY_DDX5	RALY	DDX5	-0.485858	1.59871e-06	0.489309	1.3137e-06	COREAD_chr20	2	6	2	94	0.333333	Non-promiscuous	Non-aggregation prone
RALY_DGCR8	RALY	DGCR8	0.0243417	0.805312	0.196848	0.0441474	BRCA_chr20	1	7	2	94	0.142857	Non-promiscuous	Non-aggregation prone
RALY_DHX15	RALY	DHX15	-0.376986	0.00029413	0.409001	7.60811e-05	COREAD_chr20	1	6	2	94	0.166667	Non-promiscuous	Non-aggregation prone
RALY_DHX38	RALY	DHX38	0.16384	0.0949058	0.515105	1.88558e-08	BRCA_chr20	1	4	2	94	0.25	Non-promiscuous	Non-aggregation prone
RALY_DHX8	RALY	DHX8	0.0890775	0.409192	0.38517	0.000210889	COREAD_chr20	1	3	2	94	0.333333	Non-promiscuous	Non-aggregation prone
RALY_DROSHA	RALY	DROSHA	0.0660688	0.503092	0.413964	1.13513e-05	BRCA_chr20	1	4	2	94	0.25	Non-promiscuous	Non-aggregation prone
RALY_EFTUD2	RALY	EFTUD2	0.084798	0.43215	0.372087	0.000357458	COREAD_chr20	1	5	2	94	0.2	Non-promiscuous	Non-aggregation prone
RALY_EIF4A3	RALY	EIF4A3	0.0455426	0.673509	-0.116794	0.278508	COREAD_chr20	1	12	2	94	0.0833333	Non-promiscuous	Non-aggregation prone
RALY_EWSR1	RALY	EWSR1	0.0916664	0.395658	-0.0930619	0.388474	COREAD_chr20	1	3	2	94	0.333333	Non-promiscuous	Non-aggregation prone
RALY_FRG1	RALY	FRG1	-0.104313	0.289607	0.340141	0.000385006	BRCA_chr20	1	2	2	94	0.5	Non-promiscuous	Non-aggregation prone
RALY_FUS	RALY	FUS	0.0857247	0.384572	0.498611	6.19398e-08	BRCA_chr20	1	3	2	94	0.333333	Non-promiscuous	Non-aggregation prone
RALY_GPATCH1	RALY	GPATCH1	0.0593614	0.547492	-0.252975	0.00922256	BRCA_chr20	1	2	2	94	0.5	Non-promiscuous	Non-aggregation prone
RALY_HNRNPA1	RALY	HNRNPA1	0.000466515	0.996232	0.582366	7.19205e-11	BRCA_chr20	1	3	2	94	0.333333	Non-promiscuous	Non-aggregation prone
RALY_HNRNPA2B1	RALY	HNRNPA2B1	0.228976	0.0187975	0.518723	1.44024e-08	BRCA_chr20	1	3	2	94	0.333333	Non-promiscuous	Non-aggregation prone
RALY_HNRNPA3	RALY	HNRNPA3	0.154261	0.116136	0.720713	0	BRCA_chr20	1	2	2	94	0.5	Non-promiscuous	Non-aggregation prone
RALY_HNRNPC	RALY	HNRNPC	-0.505389	5.11286e-07	0.310148	0.00327443	COREAD_chr20	1	4	2	94	0.25	Non-promiscuous	Non-aggregation prone
RALY_HNRNPDL	RALY	HNRNPDL	-0.467754	4.32706e-06	0.36475	0.000475979	COREAD_chr20	1	2	2	94	0.5	Non-promiscuous	Non-aggregation prone
RALY_HNRNPF	RALY	HNRNPF	-0.178807	0.0955474	0.368603	0.000409868	COREAD_chr20	1	4	2	94	0.25	Non-promiscuous	Non-aggregation prone
RALY_HNRNPH1	RALY	HNRNPH1	-0.229633	0.0313821	0.363636	0.00049683	COREAD_chr20	2	6	2	94	0.333333	Non-promiscuous	Non-aggregation prone
RALY_HNRNPK	RALY	HNRNPK	-0.394227	0.000144448	0.5228	1.74012e-07	COREAD_chr20	1	4	2	94	0.25	Non-promiscuous	Non-aggregation prone
RALY_HNRNPM	RALY	HNRNPM	0.165976	0.0906188	0.6014	1.16873e-11	BRCA_chr20	2	3	2	94	0.666667	Non-promiscuous	Non-aggregation prone
RALY_HNRNPR	RALY	HNRNPR	-0.544961	4.03268e-08	0.403059	9.88149e-05	COREAD_chr20	1	4	2	94	0.25	Non-promiscuous	Non-aggregation prone
RALY_HNRNPU	RALY	HNRNPU	-0.332834	0.00153241	0.40516	9.01408e-05	COREAD_chr20	2	10	2	94	0.2	Non-promiscuous	Non-aggregation prone
RALY_HNRNPUL1	RALY	HNRNPUL1	0.217945	0.0255185	0.329069	0.000609007	BRCA_chr20	1	2	2	94	0.5	Non-promiscuous	Non-aggregation prone
RALY_ILF2	RALY	ILF2	-0.271794	0.0104187	0.459406	6.721e-06	COREAD_chr20	1	5	2	94	0.2	Non-promiscuous	Non-aggregation prone
RALY_ILF3	RALY	ILF3	0.168878	0.0850396	0.476726	2.73276e-07	BRCA_chr20	1	8	2	94	0.125	Non-promiscuous	Non-aggregation prone
RALY_ISY1	RALY	ISY1	0.199264	0.0415608	0.692971	2.22045e-16	BRCA_chr20	1	3	2	94	0.333333	Non-promiscuous	Non-aggregation prone
RALY_LSM2	RALY	LSM2	0.0480786	0.656445	-0.0357552	0.740853	COREAD_chr20	1	6	2	94	0.166667	Non-promiscuous	Non-aggregation prone
RALY_LSM3	RALY	LSM3	0.11696	0.234745	-0.697553	0	BRCA_chr20	1	5	2	94	0.2	Non-promiscuous	Non-aggregation prone
RALY_MAGOH	RALY	MAGOH	0.147595	0.132959	-0.390203	3.8738e-05	BRCA_chr20	1	13	2	94	0.0769231	Non-promiscuous	Non-aggregation prone
RALY_PABPC1	RALY	PABPC1	0.370133	0.000101786	0.538659	3.07993e-09	BRCA_chr20	1	7	2	94	0.142857	Non-promiscuous	Non-aggregation prone
RALY_PLRG1	RALY	PLRG1	-0.0343666	0.72781	0.535611	3.92454e-09	BRCA_chr20	1	5	2	94	0.2	Non-promiscuous	Non-aggregation prone
RALY_PNN	RALY	PNN	0.0595895	0.545951	0.756241	0	BRCA_chr20	1	2	2	94	0.5	Non-promiscuous	Non-aggregation prone
RALY_PPIE	RALY	PPIE	0.134955	0.209976	0.0435158	0.687266	COREAD_chr20	1	3	2	94	0.333333	Non-promiscuous	Non-aggregation prone
RALY_PPIL1	RALY	PPIL1	0.282656	0.00348335	0.722735	0	BRCA_chr20	1	3	2	94	0.333333	Non-promiscuous	Non-aggregation prone
RALY_PPIL3	RALY	PPIL3	-0.256208	0.0159769	0.0116525	0.914193	COREAD_chr20	1	3	2	94	0.333333	Non-promiscuous	Non-aggregation prone
RALY_PPWD1	RALY	PPWD1	-0.389701	0.000174757	0.115008	0.285975	COREAD_chr20	1	3	2	94	0.333333	Non-promiscuous	Non-aggregation prone
RALY_PRPF19	RALY	PRPF19	0.371244	0.000369534	0.172443	0.108145	COREAD_chr20	1	5	2	94	0.2	Non-promiscuous	Non-aggregation prone
RALY_PRPF4B	RALY	PRPF4B	0.090452	0.358805	0.287943	0.00289593	BRCA_chr20	1	3	2	94	0.333333	Non-promiscuous	Non-aggregation prone
RALY_PRPF8	RALY	PRPF8	-0.0437991	0.685337	0.436263	2.14823e-05	COREAD_chr20	1	7	2	94	0.142857	Non-promiscuous	Non-aggregation prone
RALY_RBM22	RALY	RBM22	-0.125689	0.201394	0.530002	6.09185e-09	BRCA_chr20	1	3	2	94	0.333333	Non-promiscuous	Non-aggregation prone
RALY_RBM8A	RALY	RBM8A	-0.0113104	0.908831	0.369055	0.000107019	BRCA_chr20	1	16	2	94	0.0625	Non-promiscuous	Non-aggregation prone
RALY_RBMX	RALY	RBMX	0.0700705	0.477526	0.772403	0	BRCA_chr20	1	3	2	94	0.333333	Non-promiscuous	Non-aggregation prone
RALY_SART1	RALY	SART1	0.449658	1.49386e-06	0.581536	7.76401e-11	BRCA_chr20	1	3	2	94	0.333333	Non-promiscuous	Non-aggregation prone
RALY_SF3A1	RALY	SF3A1	-0.0646684	0.549442	0.27971	0.00830778	COREAD_chr20	1	6	2	94	0.166667	Non-promiscuous	Non-aggregation prone
RALY_SF3A2	RALY	SF3A2	0.241727	0.0129816	0.308117	0.00138557	BRCA_chr20	1	5	2	94	0.2	Non-promiscuous	Non-aggregation prone
RALY_SF3A3	RALY	SF3A3	-0.283382	0.00746334	0.0783862	0.46788	COREAD_chr20	1	5	2	94	0.2	Non-promiscuous	Non-aggregation prone
RALY_SF3B1	RALY	SF3B1	0.00703919	0.943185	0.574891	1.42242e-10	BRCA_chr20	1	9	2	94	0.111111	Non-promiscuous	Non-aggregation prone
RALY_SF3B2	RALY	SF3B2	0.414638	1.09478e-05	0.490431	1.0919e-07	BRCA_chr20	1	7	2	94	0.142857	Non-promiscuous	Non-aggregation prone
RALY_SF3B3	RALY	SF3B3	0.190448	0.0755159	0.298705	0.00470046	COREAD_chr20	1	15	2	94	0.0666667	Non-promiscuous	Non-aggregation prone
RALY_SLU7	RALY	SLU7	-0.127255	0.195793	0.649419	6.70575e-14	BRCA_chr20	1	3	2	94	0.333333	Non-promiscuous	Non-aggregation prone
RALY_SNRNP200	RALY	SNRNP200	0.301839	0.00426332	0.392228	0.00015718	COREAD_chr20	1	4	2	94	0.25	Non-promiscuous	Non-aggregation prone
RALY_SNRNP40	RALY	SNRNP40	-0.268712	0.0113595	-0.166643	0.120717	COREAD_chr20	1	4	2	94	0.25	Non-promiscuous	Non-aggregation prone
RALY_SNRPA1	RALY	SNRPA1	-0.0545419	0.613763	0.524179	1.5936e-07	COREAD_chr20	1	6	2	94	0.166667	Non-promiscuous	Non-aggregation prone
RALY_SNRPD1	RALY	SNRPD1	-0.52064	1.99559e-07	-0.176096	0.100765	COREAD_chr20	1	18	2	94	0.0555556	Non-promiscuous	Non-aggregation prone
RALY_SNRPD2	RALY	SNRPD2	0.207796	0.0334149	0.462171	6.93668e-07	BRCA_chr20	1	14	2	94	0.0714286	Non-promiscuous	Non-aggregation prone
RALY_SNRPD3	RALY	SNRPD3	-0.150875	0.160574	-0.0924201	0.391767	COREAD_chr20	1	17	2	94	0.0588235	Non-promiscuous	Non-aggregation prone
RALY_SNRPE	RALY	SNRPE	-0.0157268	0.884371	0.0465023	0.667031	COREAD_chr20	1	13	2	94	0.0769231	Non-promiscuous	Non-aggregation prone
RALY_SNRPF	RALY	SNRPF	0.119334	0.268119	0.073333	0.497136	COREAD_chr20	1	12	2	94	0.0833333	Non-promiscuous	Non-aggregation prone
RALY_SNRPG	RALY	SNRPG	0.428022	5.24873e-06	0.554779	8.20472e-10	BRCA_chr20	1	12	2	94	0.0833333	Non-promiscuous	Non-aggregation prone
RALY_SNW1	RALY	SNW1	-0.130261	0.185352	0.580666	8.41163e-11	BRCA_chr20	1	5	2	94	0.2	Non-promiscuous	Non-aggregation prone
RALY_SRPK1	RALY	SRPK1	0.270755	0.00521283	0.627286	8.07354e-13	BRCA_chr20	1	4	2	94	0.25	Non-promiscuous	Non-aggregation prone
RALY_SRRM1	RALY	SRRM1	-0.555616	1.92143e-08	-0.0846778	0.432805	COREAD_chr20	1	10	2	94	0.1	Non-promiscuous	Non-aggregation prone
RALY_SRRM2	RALY	SRRM2	-0.114462	0.244963	0.486461	1.43022e-07	BRCA_chr20	1	5	2	94	0.2	Non-promiscuous	Non-aggregation prone
RALY_SRSF1	RALY	SRSF1	-0.366437	0.000445922	0.351221	0.000793075	COREAD_chr20	1	6	2	94	0.166667	Non-promiscuous	Non-aggregation prone
RALY_SYF2	RALY	SYF2	-0.134781	0.170428	0.3822	5.73741e-05	BRCA_chr20	1	3	2	94	0.333333	Non-promiscuous	Non-aggregation prone
RALY_SYNCRIP	RALY	SYNCRIP	-0.395284	0.000138111	0.370919	0.000374299	COREAD_chr20	1	5	2	94	0.2	Non-promiscuous	Non-aggregation prone
RALY_TAF15	RALY	TAF15	0.0382231	0.698665	0.471615	3.80882e-07	BRCA_chr20	1	3	2	94	0.333333	Non-promiscuous	Non-aggregation prone
RALY_TARDBP	RALY	TARDBP	0.230033	0.0182418	0.371418	9.58581e-05	BRCA_chr20	1	2	2	94	0.5	Non-promiscuous	Non-aggregation prone
RALY_TFIP11	RALY	TFIP11	-0.00924736	0.925407	0.0414783	0.674398	BRCA_chr20	1	6	2	94	0.166667	Non-promiscuous	Non-aggregation prone
RALY_U2AF1	RALY	U2AF1	0.0823139	0.403837	0.211466	0.0303499	BRCA_chr20	1	6	2	94	0.166667	Non-promiscuous	Non-aggregation prone
RALY_WDR83	RALY	WDR83	-0.00587808	0.952544	0.207371	0.0337862	BRCA_chr20	1	2	2	94	0.5	Non-promiscuous	Non-aggregation prone
RALY_XAB2	RALY	XAB2	0.0252436	0.798249	0.633485	4.10116e-13	BRCA_chr20	1	3	2	94	0.333333	Non-promiscuous	Non-aggregation prone
RALY_ZCCHC8	RALY	ZCCHC8	-0.587035	1.84217e-09	0.212002	0.0473765	COREAD_chr20	1	3	2	94	0.333333	Non-promiscuous	Non-aggregation prone
RB1_C1QBP	RB1	C1QBP	0.256683	0.0157754	-0.072877	0.499822	COREAD_chr13	1	18	13	29	0.0555556	Promiscuous	Non-aggregation prone
RB1_DNMT1	RB1	DNMT1	-0.0582227	0.590008	0.236253	0.0266892	COREAD_chr13	1	21	13	29	0.047619	Promiscuous	Non-aggregation prone
RB1_E2F4	RB1	E2F4	0.11958	0.267124	0.0327174	0.762188	COREAD_chr13	1	21	13	29	0.047619	Promiscuous	Non-aggregation prone
RB1_EMD	RB1	EMD	-0.114402	0.288538	0.220613	0.0388787	COREAD_chr13	1	21	13	29	0.047619	Promiscuous	Non-aggregation prone
RB1_HDAC1	RB1	HDAC1	0.201543	0.0597035	0.210352	0.0491684	COREAD_chr13	3	86	13	29	0.0348837	Promiscuous	Non-aggregation prone
RB1_HIST1H3A	RB1	HIST1H3A	0.124099	0.249334	-0.0080801	0.940441	COREAD_chr13	1	23	13	29	0.0434783	Promiscuous	Non-aggregation prone
RB1_HNRNPU	RB1	HNRNPU	0.45613	7.96345e-06	0.239544	0.0245872	COREAD_chr13	1	22	13	29	0.0454545	Promiscuous	Non-aggregation prone
RB1_LMNA	RB1	LMNA	-0.00827727	0.93899	-0.0817235	0.449086	COREAD_chr13	1	16	13	29	0.0625	Promiscuous	Non-aggregation prone
RB1_LMNB1	RB1	LMNB1	0.259801	0.0145081	0.194639	0.0691884	COREAD_chr13	1	17	13	29	0.0588235	Promiscuous	Non-aggregation prone
RB1_MCM2	RB1	MCM2	-0.0241802	0.823053	0.14183	0.18746	COREAD_chr13	1	17	13	29	0.0588235	Promiscuous	Non-aggregation prone
RB1_MCM4	RB1	MCM4	0.0469691	0.66389	0.138964	0.196622	COREAD_chr13	1	16	13	29	0.0625	Promiscuous	Non-aggregation prone
RB1_MCM6	RB1	MCM6	0.277447	0.00886899	0.168754	0.116018	COREAD_chr13	1	17	13	29	0.0588235	Promiscuous	Non-aggregation prone
RB1_NMI	RB1	NMI	0.506058	4.91076e-07	-0.122992	0.253614	COREAD_chr13	1	22	13	29	0.0454545	Promiscuous	Non-aggregation prone
RB1_SAP130	RB1	SAP130	-0.153781	0.152576	0.109947	0.307849	COREAD_chr13	1	20	13	29	0.05	Promiscuous	Non-aggregation prone
RB1_SMARCA4	RB1	SMARCA4	-0.221373	0.0381945	-0.0241876	0.823	COREAD_chr13	1	42	13	29	0.0238095	Promiscuous	Non-aggregation prone
RB1_TRIM27	RB1	TRIM27	0.234705	0.0277298	-0.00915419	0.932541	COREAD_chr13	1	14	13	29	0.0714286	Promiscuous	Non-aggregation prone
RB1CC1_ATG101	RB1CC1	ATG101	0.17628	0.0720459	0.0179867	0.85549	BRCA_chr8	3	5	5	7	0.6	Non-promiscuous	Non-aggregation prone
RB1CC1_ATG13	RB1CC1	ATG13	0.335486	0.00046784	0.26696	0.00590638	BRCA_chr8	5	6	5	7	0.833333	Non-promiscuous	Non-aggregation prone
RB1CC1_C9orf72	RB1CC1	C9orf72	0.331858	0.000543447	0.0442056	0.687892	BRCA_chr8	1	7	5	7	0.142857	Non-promiscuous	Non-aggregation prone
RB1CC1_SMCR8	RB1CC1	SMCR8	0.53447	4.29436e-09	0.0519179	0.598897	BRCA_chr8	1	7	5	7	0.142857	Non-promiscuous	Non-aggregation prone
RB1CC1_ULK1	RB1CC1	ULK1	0.403701	1.95118e-05	0.173913	0.0954738	BRCA_chr8	4	6	5	7	0.666667	Non-promiscuous	Non-aggregation prone
RB1CC1_WDR41	RB1CC1	WDR41	0.277182	0.00420197	-0.223056	0.0221852	BRCA_chr8	1	6	5	7	0.166667	Non-promiscuous	Non-aggregation prone
RBCK1_BIRC3	RBCK1	BIRC3	0.017852	0.856562	0.0614763	0.533289	BRCA_chr20	1	2	2	15	0.5	Non-promiscuous	Non-aggregation prone
RBCK1_CHUK	RBCK1	CHUK	0.133548	0.174411	0.287632	0.00292785	BRCA_chr20	1	23	2	15	0.0434783	Non-promiscuous	Non-aggregation prone
RBCK1_IKBKG	RBCK1	IKBKG	0.268153	0.00568011	0.16017	0.102645	BRCA_chr20	1	21	2	15	0.047619	Non-promiscuous	Non-aggregation prone
RBCK1_MAP3K7	RBCK1	MAP3K7	0.0415924	0.673554	0.45904	8.42859e-07	BRCA_chr20	1	8	2	15	0.125	Non-promiscuous	Non-aggregation prone
RBCK1_RIPK1	RBCK1	RIPK1	0.13644	0.16518	-0.0366266	0.71068	BRCA_chr20	1	4	2	15	0.25	Non-promiscuous	Non-aggregation prone
RBCK1_RNF31	RBCK1	RNF31	0.410056	1.39811e-05	-0.125513	0.202032	BRCA_chr20	2	2	2	15	1	Non-promiscuous	Non-aggregation prone
RBCK1_SHARPIN	RBCK1	SHARPIN	0.0812461	0.409984	0.300518	0.00184027	BRCA_chr20	1	2	2	15	0.5	Non-promiscuous	Non-aggregation prone
RBCK1_TAB1	RBCK1	TAB1	0.138192	0.159768	-0.626633	8.66418e-13	BRCA_chr20	1	5	2	15	0.2	Non-promiscuous	Non-aggregation prone
RBCK1_TAB2	RBCK1	TAB2	0.20479	0.0361165	0.164617	0.0933268	BRCA_chr20	1	6	2	15	0.166667	Non-promiscuous	Non-aggregation prone
RBCK1_TNFRSF1A	RBCK1	TNFRSF1A	-0.0116836	0.905836	0.390762	0.0270151	BRCA_chr20	1	4	2	15	0.25	Non-promiscuous	Non-aggregation prone
RBCK1_TNIP1	RBCK1	TNIP1	0.294112	0.00232429	0.385963	4.77593e-05	BRCA_chr20	1	3	2	15	0.333333	Non-promiscuous	Non-aggregation prone
RBCK1_TRADD	RBCK1	TRADD	0.11948	0.224748	-0.524736	9.13955e-09	BRCA_chr20	1	6	2	15	0.166667	Non-promiscuous	Non-aggregation prone
RBCK1_TRAF2	RBCK1	TRAF2	0.0942774	0.338757	0.0643687	0.514166	BRCA_chr20	1	10	2	15	0.1	Non-promiscuous	Non-aggregation prone
RBM28_ACTA2	RBM28	ACTA2	-0.248582	0.0195251	-0.122621	0.255062	COREAD_chr7	1	2	1	104	0.5	Non-promiscuous	Non-aggregation prone
RBM28_ACTG2	RBM28	ACTG2	-0.161336	0.133178	-0.141976	0.187001	COREAD_chr7	1	1	1	104	1	Non-promiscuous	Non-aggregation prone
RBM28_BRIX1	RBM28	BRIX1	0.488289	1.39257e-06	-0.216911	0.0423614	COREAD_chr7	1	1	1	104	1	Non-promiscuous	Non-aggregation prone
RBM28_DDX21	RBM28	DDX21	0.601705	5.64421e-10	0.546541	3.61876e-08	COREAD_chr7	1	4	1	104	0.25	Non-promiscuous	Non-aggregation prone
RBM28_DHX9	RBM28	DHX9	0.627769	5.91225e-11	0.40141	0.000106163	COREAD_chr7	1	9	1	104	0.111111	Non-promiscuous	Non-aggregation prone
RBM28_EBNA1BP2	RBM28	EBNA1BP2	0.463245	5.49663e-06	0.617117	1.52444e-10	COREAD_chr7	1	1	1	104	1	Non-promiscuous	Non-aggregation prone
RBM28_EEF1A1	RBM28	EEF1A1	-0.119492	0.267479	0.307041	0.00361718	COREAD_chr7	1	2	1	104	0.5	Non-promiscuous	Non-aggregation prone
RBM28_EEF2	RBM28	EEF2	-0.101652	0.345993	0.257463	0.0154497	COREAD_chr7	1	1	1	104	1	Non-promiscuous	Non-aggregation prone
RBM28_FBL	RBM28	FBL	0.216213	0.0430468	0.0328223	0.761448	COREAD_chr7	1	4	1	104	0.25	Non-promiscuous	Non-aggregation prone
RBM28_GNL3	RBM28	GNL3	0.580061	3.16739e-09	0.163117	0.128894	COREAD_chr7	1	1	1	104	1	Non-promiscuous	Non-aggregation prone
RBM28_H1FX	RBM28	H1FX	0.0679441	0.529358	0.0424241	0.694719	COREAD_chr7	1	1	1	104	1	Non-promiscuous	Non-aggregation prone
RBM28_HIST1H1D	RBM28	HIST1H1D	0.141846	0.187408	0.463312	5.47751e-06	COREAD_chr7	1	2	1	104	0.5	Non-promiscuous	Non-aggregation prone
RBM28_HNRNPA1	RBM28	HNRNPA1	0.447307	1.24688e-05	-0.148836	0.16637	COREAD_chr7	1	2	1	104	0.5	Non-promiscuous	Non-aggregation prone
RBM28_HNRNPM	RBM28	HNRNPM	0.439153	1.86655e-05	0.0639796	0.553711	COREAD_chr7	1	3	1	104	0.333333	Non-promiscuous	Non-aggregation prone
RBM28_HNRNPU	RBM28	HNRNPU	0.654538	4.6283e-12	0.257171	0.0155711	COREAD_chr7	1	10	1	104	0.1	Non-promiscuous	Non-aggregation prone
RBM28_IGF2BP1	RBM28	IGF2BP1	0.252578	0.0175895	-0.0312563	0.772514	COREAD_chr7	1	2	1	104	0.5	Non-promiscuous	Non-aggregation prone
RBM28_ILF2	RBM28	ILF2	0.384347	0.000218151	0.594175	1.04349e-09	COREAD_chr7	1	4	1	104	0.25	Non-promiscuous	Non-aggregation prone
RBM28_ILF3	RBM28	ILF3	0.551865	2.50186e-08	0.2096	0.0500028	COREAD_chr7	1	7	1	104	0.142857	Non-promiscuous	Non-aggregation prone
RBM28_LYAR	RBM28	LYAR	0.608837	3.10671e-10	0.211703	0.0476968	COREAD_chr7	1	1	1	104	1	Non-promiscuous	Non-aggregation prone
RBM28_MYBBP1A	RBM28	MYBBP1A	0.315593	0.00274322	0.488736	1.35747e-06	COREAD_chr7	1	3	1	104	0.333333	Non-promiscuous	Non-aggregation prone
RBM28_NCL	RBM28	NCL	0.66507	1.58185e-12	0.49967	7.19182e-07	COREAD_chr7	1	8	1	104	0.125	Non-promiscuous	Non-aggregation prone
RBM28_NOLC1	RBM28	NOLC1	0.681061	2.84661e-13	-0.0412574	0.702715	COREAD_chr7	1	1	1	104	1	Non-promiscuous	Non-aggregation prone
RBM28_NOP58	RBM28	NOP58	0.654151	4.81104e-12	0.120239	0.264477	COREAD_chr7	1	1	1	104	1	Non-promiscuous	Non-aggregation prone
RBM28_NPM1	RBM28	NPM1	0.357666	0.000623587	-0.0770942	0.47527	COREAD_chr7	1	9	1	104	0.111111	Non-promiscuous	Non-aggregation prone
RBM28_PWP1	RBM28	PWP1	0.325314	0.00198365	-0.208521	0.051221	COREAD_chr7	1	1	1	104	1	Non-promiscuous	Non-aggregation prone
RBM28_RPL10	RBM28	RPL10	-0.0595083	0.581809	-0.410335	7.16926e-05	COREAD_chr7	1	3	1	104	0.333333	Non-promiscuous	Non-aggregation prone
RBM28_RPL10A	RBM28	RPL10A	-0.0476736	0.659159	0.025704	0.812101	COREAD_chr7	1	4	1	104	0.25	Non-promiscuous	Non-aggregation prone
RBM28_RPL11	RBM28	RPL11	0.307879	0.00352168	0.486296	1.55958e-06	COREAD_chr7	1	4	1	104	0.25	Non-promiscuous	Non-aggregation prone
RBM28_RPL12	RBM28	RPL12	-0.0812053	0.451976	0.482977	1.88041e-06	COREAD_chr7	1	4	1	104	0.25	Non-promiscuous	Non-aggregation prone
RBM28_RPL13	RBM28	RPL13	-0.114033	0.29011	0.343237	0.00106083	COREAD_chr7	1	4	1	104	0.25	Non-promiscuous	Non-aggregation prone
RBM28_RPL13A	RBM28	RPL13A	-0.0335494	0.756326	0.334205	0.00146095	COREAD_chr7	1	4	1	104	0.25	Non-promiscuous	Non-aggregation prone
RBM28_RPL14	RBM28	RPL14	0.291571	0.00584714	0.247899	0.0198737	COREAD_chr7	1	4	1	104	0.25	Non-promiscuous	Non-aggregation prone
RBM28_RPL15	RBM28	RPL15	-0.00803071	0.940804	-0.0160144	0.882272	COREAD_chr7	1	4	1	104	0.25	Non-promiscuous	Non-aggregation prone
RBM28_RPL17	RBM28	RPL17	-0.0284949	0.792136	-0.196405	0.066653	COREAD_chr7	1	3	1	104	0.333333	Non-promiscuous	Non-aggregation prone
RBM28_RPL18	RBM28	RPL18	-0.0463175	0.668277	0.552338	2.42041e-08	COREAD_chr7	1	3	1	104	0.333333	Non-promiscuous	Non-aggregation prone
RBM28_RPL18A	RBM28	RPL18A	-0.0599486	0.579014	0.00196878	0.985476	COREAD_chr7	1	4	1	104	0.25	Non-promiscuous	Non-aggregation prone
RBM28_RPL19	RBM28	RPL19	0.194428	0.0694962	0.139144	0.196039	COREAD_chr7	1	4	1	104	0.25	Non-promiscuous	Non-aggregation prone
RBM28_RPL21	RBM28	RPL21	0.29025	0.00608476	-0.227004	0.033429	COREAD_chr7	1	4	1	104	0.25	Non-promiscuous	Non-aggregation prone
RBM28_RPL22	RBM28	RPL22	0.413582	6.19811e-05	0.0487313	0.652082	COREAD_chr7	1	3	1	104	0.333333	Non-promiscuous	Non-aggregation prone
RBM28_RPL23	RBM28	RPL23	0.25487	0.016556	0.464169	5.23508e-06	COREAD_chr7	1	3	1	104	0.333333	Non-promiscuous	Non-aggregation prone
RBM28_RPL23A	RBM28	RPL23A	0.0272093	0.801317	0.0673088	0.533224	COREAD_chr7	1	3	1	104	0.333333	Non-promiscuous	Non-aggregation prone
RBM28_RPL24	RBM28	RPL24	0.227044	0.0333975	0.236442	0.0265646	COREAD_chr7	1	3	1	104	0.333333	Non-promiscuous	Non-aggregation prone
RBM28_RPL27	RBM28	RPL27	-0.131362	0.22248	-0.104376	0.333153	COREAD_chr7	1	4	1	104	0.25	Non-promiscuous	Non-aggregation prone
RBM28_RPL27A	RBM28	RPL27A	0.105984	0.325717	0.103513	0.337189	COREAD_chr7	1	3	1	104	0.333333	Non-promiscuous	Non-aggregation prone
RBM28_RPL28	RBM28	RPL28	-0.224807	0.0352253	0.368494	0.000411615	COREAD_chr7	1	4	1	104	0.25	Non-promiscuous	Non-aggregation prone
RBM28_RPL29	RBM28	RPL29	0.104399	0.333046	-0.0489771	0.650442	COREAD_chr7	1	3	1	104	0.333333	Non-promiscuous	Non-aggregation prone
RBM28_RPL3	RBM28	RPL3	-0.0369659	0.732404	-0.234989	0.0275359	COREAD_chr7	1	3	1	104	0.333333	Non-promiscuous	Non-aggregation prone
RBM28_RPL30	RBM28	RPL30	0.13772	0.2007	0.239081	0.0248741	COREAD_chr7	1	6	1	104	0.166667	Non-promiscuous	Non-aggregation prone
RBM28_RPL31	RBM28	RPL31	0.0568138	0.599051	0.0645514	0.550166	COREAD_chr7	1	3	1	104	0.333333	Non-promiscuous	Non-aggregation prone
RBM28_RPL32	RBM28	RPL32	0.151421	0.159048	-0.174389	0.104163	COREAD_chr7	1	4	1	104	0.25	Non-promiscuous	Non-aggregation prone
RBM28_RPL35	RBM28	RPL35	-0.0363319	0.736824	0.198787	0.0633538	COREAD_chr7	1	3	1	104	0.333333	Non-promiscuous	Non-aggregation prone
RBM28_RPL35A	RBM28	RPL35A	0.24513	0.0213415	0.103602	0.336769	COREAD_chr7	1	4	1	104	0.25	Non-promiscuous	Non-aggregation prone
RBM28_RPL36	RBM28	RPL36	-0.165193	0.124029	-0.219861	0.0395661	COREAD_chr7	1	4	1	104	0.25	Non-promiscuous	Non-aggregation prone
RBM28_RPL36A	RBM28	RPL36A	0.388169	0.000186281	0.156264	0.145981	COREAD_chr7	1	3	1	104	0.333333	Non-promiscuous	Non-aggregation prone
RBM28_RPL37A	RBM28	RPL37A	0.096034	0.373435	0.202658	0.0582762	COREAD_chr7	1	4	1	104	0.25	Non-promiscuous	Non-aggregation prone
RBM28_RPL4	RBM28	RPL4	0.185252	0.0839947	0.134553	0.211349	COREAD_chr7	1	4	1	104	0.25	Non-promiscuous	Non-aggregation prone
RBM28_RPL5	RBM28	RPL5	0.107622	0.318254	-0.0924214	0.391761	COREAD_chr7	1	3	1	104	0.333333	Non-promiscuous	Non-aggregation prone
RBM28_RPL6	RBM28	RPL6	0.35277	0.000748882	0.022943	0.831971	COREAD_chr7	1	5	1	104	0.2	Non-promiscuous	Non-aggregation prone
RBM28_RPL7	RBM28	RPL7	0.481931	1.9938e-06	0.183	0.0878986	COREAD_chr7	1	4	1	104	0.25	Non-promiscuous	Non-aggregation prone
RBM28_RPL7A	RBM28	RPL7A	-0.117731	0.274645	0.3841	0.000220375	COREAD_chr7	1	5	1	104	0.2	Non-promiscuous	Non-aggregation prone
RBM28_RPL8	RBM28	RPL8	0.000792505	0.994153	0.0522366	0.62885	COREAD_chr7	1	4	1	104	0.25	Non-promiscuous	Non-aggregation prone
RBM28_RPL9	RBM28	RPL9	0.162675	0.129947	0.030175	0.780181	COREAD_chr7	1	3	1	104	0.333333	Non-promiscuous	Non-aggregation prone
RBM28_RPLP0	RBM28	RPLP0	-0.106706	0.322413	0.185381	0.0837752	COREAD_chr7	1	3	1	104	0.333333	Non-promiscuous	Non-aggregation prone
RBM28_RPLP1	RBM28	RPLP1	-0.230636	0.0306287	-0.374751	0.000321619	COREAD_chr7	1	4	1	104	0.25	Non-promiscuous	Non-aggregation prone
RBM28_RPLP2	RBM28	RPLP2	-0.148885	0.166228	0.397713	0.000124503	COREAD_chr7	1	4	1	104	0.25	Non-promiscuous	Non-aggregation prone
RBM28_RPS11	RBM28	RPS11	-0.12636	0.240745	0.230801	0.0305067	COREAD_chr7	1	5	1	104	0.2	Non-promiscuous	Non-aggregation prone
RBM28_RPS12	RBM28	RPS12	0.0847276	0.432534	-0.196942	0.0658969	COREAD_chr7	1	4	1	104	0.25	Non-promiscuous	Non-aggregation prone
RBM28_RPS13	RBM28	RPS13	0.206122	0.0540184	0.0969812	0.368718	COREAD_chr7	1	6	1	104	0.166667	Non-promiscuous	Non-aggregation prone
RBM28_RPS14	RBM28	RPS14	-0.211581	0.0478281	0.0292146	0.787009	COREAD_chr7	1	4	1	104	0.25	Non-promiscuous	Non-aggregation prone
RBM28_RPS15	RBM28	RPS15	-0.121887	0.257938	-0.268407	0.0114564	COREAD_chr7	1	4	1	104	0.25	Non-promiscuous	Non-aggregation prone
RBM28_RPS15A	RBM28	RPS15A	0.077595	0.472398	0.129041	0.230831	COREAD_chr7	1	4	1	104	0.25	Non-promiscuous	Non-aggregation prone
RBM28_RPS16	RBM28	RPS16	-0.0881617	0.414044	0.188785	0.0781508	COREAD_chr7	1	4	1	104	0.25	Non-promiscuous	Non-aggregation prone
RBM28_RPS17	RBM28	RPS17	0.266493	0.0120819	-0.34879	0.000867227	COREAD_chr7	1	4	1	104	0.25	Non-promiscuous	Non-aggregation prone
RBM28_RPS18	RBM28	RPS18	-0.225758	0.0344381	0.0636752	0.555604	COREAD_chr7	1	4	1	104	0.25	Non-promiscuous	Non-aggregation prone
[truncated: 773 more rows]

## Sheet: Info_table2
Correlations between proteins of deleted chromosomes (show significant decrease in their abundances) and their co-complex members of other chromosomes
Colnames	Explanation
Pair	Protein pair
DAP	Protein of amplified chromosome
Partner	Co-complex member of other chromosome
t.cor	mRNA level spearman correlation
t.p	P value for mRNA level spearman correlation
p.cor	Protein level spearman correlation
p.p	P value for protein level spearman correlation
Case	Cancer type and amplified chromosome
number_of_complexes_with_protein_A_and_B	Number of CORUM complexes two proteins found together
number_of_complexes_with_protein_A_or_B	Number of CORUM complexes at least one of them involved in
Number.complex	Number of CORUM complexes for DAP
Number.partner	Number of CORUM co-complex subunits for DAP
JaccardIndex	Co-occurrence frequency
Promiscuity	Promiscuity for DAP
Aggregation	Aggregation feature of DAP

## Sheet: table2
Pair	DAP	Partner	t.cor	t.p	p.cor	p.p	Case	number_of_complexes_with_protein_A_and_B	number_of_complexes_with_protein_A_or_B	Number.complex	Number.partner	JaccardIndex	Promiscuity	Aggregation
CAMK2D_CREBBP	CAMK2D	CREBBP	0.32014	0.000386205	-0.101957	0.276129	OV_chr4	1	22	1	7	0.0454545	Non-promiscuous	Non-aggregation prone
CAMK2D_NONO	CAMK2D	NONO	0.225616	0.0136213	-0.372461	3.02877e-05	OV_chr4	1	9	1	7	0.111111	Non-promiscuous	Non-aggregation prone
CAMK2D_PARP1	CAMK2D	PARP1	0.24958	0.00619428	-0.417384	2.33035e-06	OV_chr4	1	14	1	7	0.0714286	Non-promiscuous	Non-aggregation prone
CAMK2D_SRC	CAMK2D	SRC	0.32605	0.000296137	0.0476285	0.606991	OV_chr4	1	12	1	7	0.0833333	Non-promiscuous	Non-aggregation prone
POLR2A_CAMK2D	POLR2A	CAMK2D	-0.0443189	0.653491	0.235559	0.0155629	BRCA_chr17	1	26	26	104	0.0384615	Promiscuous	Non-aggregation prone
POLR2A_GTF2F2	POLR2A	GTF2F2	0.0607298	0.538281	0.423875	6.61357e-06	BRCA_chr17	3	27	26	104	0.111111	Promiscuous	Non-aggregation prone
POLR2A_ACTB	POLR2A	ACTB	-0.189519	0.0528271	-0.569003	2.40524e-10	BRCA_chr17	1	48	26	104	0.0208333	Promiscuous	Non-aggregation prone
POLR2A_BARD1	POLR2A	BARD1	0.233247	0.0166391	-0.179594	0.128421	BRCA_chr17	1	39	26	104	0.025641	Promiscuous	Non-aggregation prone
POLR2A_CAMK2D	POLR2A	CAMK2D	-0.0443189	0.653491	0.235559	0.0155629	BRCA_chr17	1	26	26	104	0.0384615	Promiscuous	Non-aggregation prone
POLR2A_CCNC	POLR2A	CCNC	0.159061	0.105079	0.0985998	0.38117	BRCA_chr17	4	47	26	104	0.0851064	Promiscuous	Non-aggregation prone
POLR2A_CCNT1	POLR2A	CCNT1	0.587352	4.51912e-11	0.518433	1.47188e-08	BRCA_chr17	2	40	26	104	0.05	Promiscuous	Non-aggregation prone
POLR2A_CDK7	POLR2A	CDK7	0.318111	0.000943029	0.483838	1.70619e-07	BRCA_chr17	2	36	26	104	0.0555556	Promiscuous	Non-aggregation prone
POLR2A_CDK8	POLR2A	CDK8	-0.0923181	0.348935	0.354852	0.000203804	BRCA_chr17	5	47	26	104	0.106383	Promiscuous	Non-aggregation prone
POLR2A_CDK9	POLR2A	CDK9	0.397896	2.63018e-05	0.0351545	0.721823	BRCA_chr17	3	43	26	104	0.0697674	Promiscuous	Non-aggregation prone
POLR2A_COPS2	POLR2A	COPS2	0.457319	9.3735e-07	-0.245843	0.0114745	BRCA_chr17	1	31	26	104	0.0322581	Promiscuous	Non-aggregation prone
POLR2A_COPS4	POLR2A	COPS4	0.500301	5.49918e-08	-0.465146	5.75398e-07	BRCA_chr17	1	30	26	104	0.0333333	Promiscuous	Non-aggregation prone
POLR2A_COPS5	POLR2A	COPS5	-0.0699772	0.478114	-0.460761	7.57452e-07	BRCA_chr17	1	30	26	104	0.0333333	Promiscuous	Non-aggregation prone
POLR2A_COPS6	POLR2A	COPS6	0.0376944	0.702636	-0.517116	1.62394e-08	BRCA_chr17	1	30	26	104	0.0333333	Promiscuous	Non-aggregation prone
POLR2A_COPS7A	POLR2A	COPS7A	0.297844	0.00203	-0.114244	0.245867	BRCA_chr17	1	30	26	104	0.0333333	Promiscuous	Non-aggregation prone
POLR2A_COPS8	POLR2A	COPS8	0.500041	5.60069e-08	-0.530095	6.04785e-09	BRCA_chr17	1	31	26	104	0.0322581	Promiscuous	Non-aggregation prone
POLR2A_CPSF2	POLR2A	CPSF2	0.406821	1.65801e-05	-0.329774	0.000591782	BRCA_chr17	1	29	26	104	0.0344828	Promiscuous	Non-aggregation prone
POLR2A_CPSF6	POLR2A	CPSF6	0.463985	6.19072e-07	0.282594	0.00349085	BRCA_chr17	3	28	26	104	0.107143	Promiscuous	Non-aggregation prone
POLR2A_CREBBP	POLR2A	CREBBP	0.639996	1.98064e-13	0.62176	1.45839e-12	BRCA_chr17	6	42	26	104	0.142857	Promiscuous	Non-aggregation prone
POLR2A_CTDP1	POLR2A	CTDP1	0.185745	0.0578168	0.618889	1.97353e-12	BRCA_chr17	1	28	26	104	0.0357143	Promiscuous	Non-aggregation prone
POLR2A_CUL4A	POLR2A	CUL4A	0.42995	4.70895e-06	0.202146	0.0386414	BRCA_chr17	1	46	26	104	0.0217391	Promiscuous	Non-aggregation prone
POLR2A_DDB1	POLR2A	DDB1	0.338783	0.000407658	-0.403763	1.94489e-05	BRCA_chr17	1	53	26	104	0.0188679	Promiscuous	Non-aggregation prone
POLR2A_DDX20	POLR2A	DDX20	0.231381	0.0175542	0.0920693	0.350241	BRCA_chr17	1	36	26	104	0.0277778	Promiscuous	Non-aggregation prone
POLR2A_DHX9	POLR2A	DHX9	0.499648	5.75841e-08	-0.111601	0.257037	BRCA_chr17	1	34	26	104	0.0294118	Promiscuous	Non-aggregation prone
POLR2A_DRAP1	POLR2A	DRAP1	-0.327462	0.00065	0.420693	7.88107e-06	BRCA_chr17	1	26	26	104	0.0384615	Promiscuous	Non-aggregation prone
POLR2A_EP300	POLR2A	EP300	0.533143	4.76679e-09	0.434812	3.57103e-06	BRCA_chr17	2	46	26	104	0.0434783	Promiscuous	Non-aggregation prone
POLR2A_ERCC2	POLR2A	ERCC2	0.102198	0.29955	0.344837	0.000315311	BRCA_chr17	2	34	26	104	0.0588235	Promiscuous	Non-aggregation prone
POLR2A_ERCC3	POLR2A	ERCC3	0.382148	5.75184e-05	-0.242007	0.0128739	BRCA_chr17	3	33	26	104	0.0909091	Promiscuous	Non-aggregation prone
POLR2A_ERCC8	POLR2A	ERCC8	0.371594	9.50709e-05	0.130237	0.297281	BRCA_chr17	1	27	26	104	0.037037	Promiscuous	Non-aggregation prone
POLR2A_EWSR1	POLR2A	EWSR1	0.108936	0.26864	-0.141344	0.150368	BRCA_chr17	1	27	26	104	0.037037	Promiscuous	Non-aggregation prone
POLR2A_GEMIN2	POLR2A	GEMIN2	0.0722787	0.463724	0.177151	0.0706288	BRCA_chr17	1	37	26	104	0.027027	Promiscuous	Non-aggregation prone
POLR2A_GTF2B	POLR2A	GTF2B	0.260004	0.00739327	-0.321429	0.000827519	BRCA_chr17	6	27	26	104	0.222222	Promiscuous	Non-aggregation prone
POLR2A_GTF2E1	POLR2A	GTF2E1	0.273854	0.00470107	0.290545	0.00264093	BRCA_chr17	3	27	26	104	0.111111	Promiscuous	Non-aggregation prone
POLR2A_GTF2E2	POLR2A	GTF2E2	-0.249575	0.0102424	0.365385	0.000126765	BRCA_chr17	2	27	26	104	0.0740741	Promiscuous	Non-aggregation prone
POLR2A_GTF2F1	POLR2A	GTF2F1	0.284709	0.00324367	0.535072	4.09539e-09	BRCA_chr17	7	30	26	104	0.233333	Promiscuous	Non-aggregation prone
POLR2A_GTF2F2	POLR2A	GTF2F2	0.0607298	0.538281	0.423875	6.61357e-06	BRCA_chr17	3	27	26	104	0.111111	Promiscuous	Non-aggregation prone
POLR2A_GTF2H1	POLR2A	GTF2H1	0.295739	0.00219151	0.229121	0.0187204	BRCA_chr17	3	31	26	104	0.0967742	Promiscuous	Non-aggregation prone
POLR2A_GTF2H2	POLR2A	GTF2H2	0.257796	0.00792997	0.282252	0.00353239	BRCA_chr17	2	31	26	104	0.0645161	Promiscuous	Non-aggregation prone
POLR2A_GTF2H3	POLR2A	GTF2H3	0.355484	0.000198167	0.057485	0.560246	BRCA_chr17	3	31	26	104	0.0967742	Promiscuous	Non-aggregation prone
POLR2A_GTF2H4	POLR2A	GTF2H4	0.141706	0.149312	-0.387124	4.51111e-05	BRCA_chr17	2	32	26	104	0.0625	Promiscuous	Non-aggregation prone
POLR2A_HES1	POLR2A	HES1	0.192888	0.0486768	-0.0748936	0.454389	BRCA_chr17	2	26	26	104	0.0769231	Promiscuous	Non-aggregation prone
POLR2A_HIST1H4A	POLR2A	HIST1H4A	0.0151399	0.87817	-0.0436347	0.658503	BRCA_chr17	1	35	26	104	0.0285714	Promiscuous	Non-aggregation prone
POLR2A_HNRNPU	POLR2A	HNRNPU	0.48249	1.86703e-07	0.0816712	0.40753	BRCA_chr17	1	35	26	104	0.0285714	Promiscuous	Non-aggregation prone
POLR2A_HTATSF1	POLR2A	HTATSF1	0.07486	0.44787	0.526612	7.91586e-09	BRCA_chr17	1	27	26	104	0.037037	Promiscuous	Non-aggregation prone
POLR2A_INTS1	POLR2A	INTS1	0.223388	0.0219824	0.251078	0.00977998	BRCA_chr17	1	27	26	104	0.037037	Promiscuous	Non-aggregation prone
POLR2A_INTS10	POLR2A	INTS10	-0.0191893	0.845944	-0.366929	0.000118074	BRCA_chr17	1	28	26	104	0.0357143	Promiscuous	Non-aggregation prone
POLR2A_INTS12	POLR2A	INTS12	0.316307	0.00101184	0.636906	2.8022e-13	BRCA_chr17	1	27	26	104	0.037037	Promiscuous	Non-aggregation prone
POLR2A_INTS3	POLR2A	INTS3	0.548476	1.38775e-09	0.143427	0.144384	BRCA_chr17	1	27	26	104	0.037037	Promiscuous	Non-aggregation prone
POLR2A_INTS4	POLR2A	INTS4	0.401503	2.18614e-05	-0.0898714	0.36191	BRCA_chr17	1	28	26	104	0.0357143	Promiscuous	Non-aggregation prone
POLR2A_INTS5	POLR2A	INTS5	0.260844	0.00719776	0.293158	0.00240543	BRCA_chr17	1	28	26	104	0.0357143	Promiscuous	Non-aggregation prone
POLR2A_INTS7	POLR2A	INTS7	0.289374	0.00275312	-0.18391	0.0603791	BRCA_chr17	1	28	26	104	0.0357143	Promiscuous	Non-aggregation prone
POLR2A_INTS8	POLR2A	INTS8	0.071667	0.467525	-0.233859	0.0163482	BRCA_chr17	1	28	26	104	0.0357143	Promiscuous	Non-aggregation prone
POLR2A_INTS9	POLR2A	INTS9	0.121055	0.218649	-0.324083	0.000744589	BRCA_chr17	1	28	26	104	0.0357143	Promiscuous	Non-aggregation prone
POLR2A_ITCH	POLR2A	ITCH	0.494163	8.44578e-08	-0.0193863	0.844383	BRCA_chr17	3	28	26	104	0.107143	Promiscuous	Non-aggregation prone
POLR2A_KAT2B	POLR2A	KAT2B	0.370931	9.80662e-05	0.133654	0.288501	BRCA_chr17	5	34	26	104	0.147059	Promiscuous	Non-aggregation prone
POLR2A_MAML1	POLR2A	MAML1	0.659942	1.90958e-14	0.117109	0.271658	BRCA_chr17	1	29	26	104	0.0344828	Promiscuous	Non-aggregation prone
POLR2A_MED21	POLR2A	MED21	0.469241	4.43582e-07	-0.358148	0.000175969	BRCA_chr17	4	41	26	104	0.097561	Promiscuous	Non-aggregation prone
POLR2A_NCL	POLR2A	NCL	0.15084	0.124551	0.5534	9.21295e-10	BRCA_chr17	2	32	26	104	0.0625	Promiscuous	Non-aggregation prone
POLR2A_NONO	POLR2A	NONO	0.23843	0.0143105	0.425586	6.01436e-06	BRCA_chr17	2	33	26	104	0.0606061	Promiscuous	Non-aggregation prone
POLR2A_NOTCH1	POLR2A	NOTCH1	0.118204	0.22977	0.386544	4.64176e-05	BRCA_chr17	1	33	26	104	0.030303	Promiscuous	Non-aggregation prone
POLR2A_NUDT21	POLR2A	NUDT21	0.264317	0.00643687	0.0695418	0.480863	BRCA_chr17	3	28	26	104	0.107143	Promiscuous	Non-aggregation prone
POLR2A_PARP1	POLR2A	PARP1	0.352198	0.000229114	0.183869	0.0604381	BRCA_chr17	2	38	26	104	0.0526316	Promiscuous	Non-aggregation prone
POLR2A_POLR2B	POLR2A	POLR2B	0.469894	4.25418e-07	-0.00271615	0.978062	BRCA_chr17	6	30	26	104	0.2	Promiscuous	Non-aggregation prone
POLR2A_POLR2C	POLR2A	POLR2C	0.163218	0.0961841	-0.263477	0.006614	BRCA_chr17	5	27	26	104	0.185185	Promiscuous	Non-aggregation prone
POLR2A_POLR2D	POLR2A	POLR2D	0.250156	0.0100616	-0.369614	0.000104272	BRCA_chr17	5	26	26	104	0.192308	Promiscuous	Non-aggregation prone
POLR2A_POLR2E	POLR2A	POLR2E	0.248766	0.0104991	0.698818	0	BRCA_chr17	5	27	26	104	0.185185	Promiscuous	Non-aggregation prone
POLR2A_POLR2F	POLR2A	POLR2F	-0.314745	0.0010751	0.221429	0.0232037	BRCA_chr17	5	26	26	104	0.192308	Promiscuous	Non-aggregation prone
POLR2A_POLR2G	POLR2A	POLR2G	-0.00264358	0.978648	-0.283579	0.00337371	BRCA_chr17	5	26	26	104	0.192308	Promiscuous	Non-aggregation prone
POLR2A_POLR2H	POLR2A	POLR2H	-0.178488	0.0684964	0.265198	0.00625552	BRCA_chr17	5	27	26	104	0.185185	Promiscuous	Non-aggregation prone
POLR2A_POLR2I	POLR2A	POLR2I	-0.189726	0.0525635	0.567043	2.85809e-10	BRCA_chr17	5	26	26	104	0.192308	Promiscuous	Non-aggregation prone
POLR2A_POLR2J	POLR2A	POLR2J	-0.263187	0.00667622	0.138119	0.15999	BRCA_chr17	5	26	26	104	0.192308	Promiscuous	Non-aggregation prone
POLR2A_POLR2K	POLR2A	POLR2K	0.0011922	0.99037	-0.18785	0.0549885	BRCA_chr17	5	26	26	104	0.192308	Promiscuous	Non-aggregation prone
POLR2A_POLR2L	POLR2A	POLR2L	0.152239	0.121054	-0.264566	0.0063852	BRCA_chr17	5	27	26	104	0.185185	Promiscuous	Non-aggregation prone
POLR2A_RBPJ	POLR2A	RBPJ	0.323129	0.000773474	0.204862	0.0360492	BRCA_chr17	2	37	26	104	0.0540541	Promiscuous	Non-aggregation prone
POLR2A_RBX1	POLR2A	RBX1	-0.252333	0.0094082	-0.51131	2.49288e-08	BRCA_chr17	1	74	26	104	0.0135135	Promiscuous	Non-aggregation prone
POLR2A_RPAP1	POLR2A	RPAP1	0.529784	6.19572e-09	-0.0361704	0.714126	BRCA_chr17	1	27	26	104	0.037037	Promiscuous	Non-aggregation prone
POLR2A_SMARCA2	POLR2A	SMARCA2	0.501286	5.12924e-08	0.459828	8.02681e-07	BRCA_chr17	3	41	26	104	0.0731707	Promiscuous	Non-aggregation prone
POLR2A_SMARCA4	POLR2A	SMARCA4	0.0753162	0.445101	0.661901	1.5099e-14	BRCA_chr17	1	55	26	104	0.0181818	Promiscuous	Non-aggregation prone
POLR2A_SMARCB1	POLR2A	SMARCB1	-0.152115	0.121361	-0.348258	0.000272082	BRCA_chr17	5	61	26	104	0.0819672	Promiscuous	Non-aggregation prone
POLR2A_SMARCC1	POLR2A	SMARCC1	0.397004	2.75225e-05	0.23842	0.0143148	BRCA_chr17	1	62	26	104	0.016129	Promiscuous	Non-aggregation prone
POLR2A_SMARCC2	POLR2A	SMARCC2	0.695625	2.22045e-16	0.178126	0.0690697	BRCA_chr17	1	62	26	104	0.016129	Promiscuous	Non-aggregation prone
POLR2A_SMARCD1	POLR2A	SMARCD1	0.448165	1.63373e-06	-0.0361497	0.714283	BRCA_chr17	1	53	26	104	0.0188679	Promiscuous	Non-aggregation prone
POLR2A_SNRPB2	POLR2A	SNRPB2	-0.0504976	0.608946	0.0313187	0.751124	BRCA_chr17	1	29	26	104	0.0344828	Promiscuous	Non-aggregation prone
POLR2A_SNRPN	POLR2A	SNRPN	0.358304	0.000174747	0.0270371	0.784252	BRCA_chr17	1	27	26	104	0.037037	Promiscuous	Non-aggregation prone
POLR2A_SRC	POLR2A	SRC	-0.175544	0.0732616	-0.135797	0.1672	BRCA_chr17	2	36	26	104	0.0555556	Promiscuous	Non-aggregation prone
POLR2A_SSU72	POLR2A	SSU72	-0.0569044	0.56422	0.124964	0.20403	BRCA_chr17	1	26	26	104	0.0384615	Promiscuous	Non-aggregation prone
POLR2A_SUPT5H	POLR2A	SUPT5H	0.114089	0.246515	0.519345	1.37461e-08	BRCA_chr17	1	29	26	104	0.0344828	Promiscuous	Non-aggregation prone
POLR2A_SYMPK	POLR2A	SYMPK	0.366836	0.000118583	0.461663	7.16038e-07	BRCA_chr17	1	28	26	104	0.0357143	Promiscuous	Non-aggregation prone
POLR2A_TBP	POLR2A	TBP	0.270506	0.00525598	0.464035	9.0024e-07	BRCA_chr17	5	43	26	104	0.116279	Promiscuous	Non-aggregation prone
POLR2A_UBAP2L	POLR2A	UBAP2L	0.424508	6.38577e-06	0.268982	0.00552729	BRCA_chr17	2	27	26	104	0.0740741	Promiscuous	Non-aggregation prone
POLR2A_CTDP1	POLR2A	CTDP1	0.185745	0.0578168	0.618889	1.97353e-12	BRCA_chr17	1	28	26	104	0.0357143	Promiscuous	Non-aggregation prone
POLR2A_EWSR1	POLR2A	EWSR1	0.108936	0.26864	-0.141344	0.150368	BRCA_chr17	1	27	26	104	0.037037	Promiscuous	Non-aggregation prone
POLR2A_CUL4A	POLR2A	CUL4A	0.42995	4.70895e-06	0.202146	0.0386414	BRCA_chr17	1	46	26	104	0.0217391	Promiscuous	Non-aggregation prone
HNRNPD_CSDE1	HNRNPD	CSDE1	0.216408	0.0180838	-0.120638	0.191249	OV_chr4	1	6	6	10	0.166667	Promiscuous	Non-aggregation prone
HNRNPD_EIF4G1	HNRNPD	EIF4G1	0.31346	0.000518023	0.0637445	0.490992	OV_chr4	1	7	6	10	0.142857	Promiscuous	Non-aggregation prone
HNRNPD_HSPA8	HNRNPD	HSPA8	-0.273458	0.00261967	-0.168922	0.0662853	OV_chr4	1	21	6	10	0.047619	Promiscuous	Non-aggregation prone
HNRNPD_PABPC1	HNRNPD	PABPC1	0.00477852	0.958865	0.0281014	0.761605	OV_chr4	2	10	6	10	0.2	Promiscuous	Non-aggregation prone
HNRNPD_PAIP1	HNRNPD	PAIP1	0.128258	0.164495	0.0666002	0.471738	OV_chr4	1	6	6	10	0.166667	Promiscuous	Non-aggregation prone
HNRNPD_PIN1	HNRNPD	PIN1	-0.0728173	0.43128	-0.0689289	0.456347	OV_chr4	1	7	6	10	0.142857	Promiscuous	Non-aggregation prone
HNRNPD_SYNCRIP	HNRNPD	SYNCRIP	0.263403	0.00379945	0.0214001	0.817307	OV_chr4	1	9	6	10	0.111111	Promiscuous	Non-aggregation prone
HNRNPD_ZFP36L1	HNRNPD	ZFP36L1	0.222169	0.0151644	-0.233203	0.0229454	OV_chr4	1	6	6	10	0.166667	Promiscuous	Non-aggregation prone
MRPL1_DAP3	MRPL1	DAP3	0.0904216	0.328086	0.47657	4.28277e-08	OV_chr4	1	3	2	77	0.333333	Non-promiscuous	Non-aggregation prone
MRPL1_LACTB	MRPL1	LACTB	0.0826022	0.371804	-0.0295115	0.750027	OV_chr4	2	2	2	77	1	Non-promiscuous	Non-aggregation prone
MRPL1_MRPL10	MRPL1	MRPL10	0.188485	0.0400863	0.489821	4.86692e-08	OV_chr4	2	2	2	77	1	Non-promiscuous	Non-aggregation prone
MRPL1_MRPL11	MRPL1	MRPL11	0.282773	0.00183333	0.552243	7.48068e-11	OV_chr4	2	2	2	77	1	Non-promiscuous	Non-aggregation prone
MRPL1_MRPL12	MRPL1	MRPL12	0.13246	0.150988	0.478101	3.82232e-08	OV_chr4	2	2	2	77	1	Non-promiscuous	Non-aggregation prone
MRPL1_MRPL13	MRPL1	MRPL13	0.240436	0.00844062	0.590174	3.12839e-12	OV_chr4	2	2	2	77	1	Non-promiscuous	Non-aggregation prone
MRPL1_MRPL14	MRPL1	MRPL14	0.170845	0.0632109	0.527742	1.01515e-08	OV_chr4	2	2	2	77	1	Non-promiscuous	Non-aggregation prone
MRPL1_MRPL15	MRPL1	MRPL15	0.182887	0.0464998	0.670674	0	OV_chr4	2	2	2	77	1	Non-promiscuous	Non-aggregation prone
MRPL1_MRPL16	MRPL1	MRPL16	0.179483	0.0508015	0.445674	2.12665e-06	OV_chr4	2	2	2	77	1	Non-promiscuous	Non-aggregation prone
MRPL1_MRPL17	MRPL1	MRPL17	0.288712	0.00145088	0.398127	7.32489e-06	OV_chr4	2	2	2	77	1	Non-promiscuous	Non-aggregation prone
MRPL1_MRPL18	MRPL1	MRPL18	0.302393	0.00083025	0.574886	4.15599e-11	OV_chr4	2	2	2	77	1	Non-promiscuous	Non-aggregation prone
MRPL1_MRPL19	MRPL1	MRPL19	0.0342757	0.711333	0.529049	6.19776e-10	OV_chr4	2	2	2	77	1	Non-promiscuous	Non-aggregation prone
MRPL1_MRPL2	MRPL1	MRPL2	0.179013	0.0514205	0.300396	0.00227182	OV_chr4	2	2	2	77	1	Non-promiscuous	Non-aggregation prone
MRPL1_MRPL20	MRPL1	MRPL20	0.0934055	0.312309	0.481928	3.45893e-06	OV_chr4	2	2	2	77	1	Non-promiscuous	Non-aggregation prone
MRPL1_MRPL21	MRPL1	MRPL21	0.271614	0.00280748	0.488054	3.62784e-08	OV_chr4	2	2	2	77	1	Non-promiscuous	Non-aggregation prone
MRPL1_MRPL22	MRPL1	MRPL22	0.412277	3.17927e-06	0.516643	8.87743e-09	OV_chr4	2	2	2	77	1	Non-promiscuous	Non-aggregation prone
MRPL1_MRPL23	MRPL1	MRPL23	0.0377582	0.683501	0.519226	5.26072e-09	OV_chr4	2	2	2	77	1	Non-promiscuous	Non-aggregation prone
MRPL1_MRPL24	MRPL1	MRPL24	0.223707	0.0144579	0.492003	1.32618e-08	OV_chr4	2	2	2	77	1	Non-promiscuous	Non-aggregation prone
MRPL1_MRPL27	MRPL1	MRPL27	0.238898	0.00888212	0.520472	8.80349e-07	OV_chr4	2	2	2	77	1	Non-promiscuous	Non-aggregation prone
MRPL1_MRPL28	MRPL1	MRPL28	0.227396	0.0128792	0.643539	1.15463e-14	OV_chr4	2	2	2	77	1	Non-promiscuous	Non-aggregation prone
MRPL1_MRPL3	MRPL1	MRPL3	0.152941	0.0968008	0.441137	1.25981e-06	OV_chr4	2	2	2	77	1	Non-promiscuous	Non-aggregation prone
MRPL1_MRPL30	MRPL1	MRPL30	0.203525	0.0264152	0.377752	7.10582e-05	OV_chr4	2	2	2	77	1	Non-promiscuous	Non-aggregation prone
MRPL1_MRPL32	MRPL1	MRPL32	0.243391	0.00764644	0.482942	4.74336e-07	OV_chr4	2	2	2	77	1	Non-promiscuous	Non-aggregation prone
MRPL1_MRPL33	MRPL1	MRPL33	0.35814	6.35854e-05	0.55542	2.31548e-07	OV_chr4	2	2	2	77	1	Non-promiscuous	Non-aggregation prone
MRPL1_MRPL37	MRPL1	MRPL37	-0.0632887	0.494103	0.680012	0	OV_chr4	2	2	2	77	1	Non-promiscuous	Non-aggregation prone
MRPL1_MRPL38	MRPL1	MRPL38	-0.0667782	0.470552	0.590894	3.61089e-12	OV_chr4	2	2	2	77	1	Non-promiscuous	Non-aggregation prone
MRPL1_MRPL39	MRPL1	MRPL39	0.224469	0.0141187	0.565625	2.04783e-11	OV_chr4	2	2	2	77	1	Non-promiscuous	Non-aggregation prone
MRPL1_MRPL4	MRPL1	MRPL4	-0.127489	0.167062	0.53228	6.55709e-10	OV_chr4	2	2	2	77	1	Non-promiscuous	Non-aggregation prone
MRPL1_MRPL40	MRPL1	MRPL40	0.0743199	0.421808	0.336187	0.000239403	OV_chr4	2	2	2	77	1	Non-promiscuous	Non-aggregation prone
MRPL1_MRPL41	MRPL1	MRPL41	0.177133	0.0539592	0.552836	8.52198e-11	OV_chr4	2	2	2	77	1	Non-promiscuous	Non-aggregation prone
MRPL1_MRPL42	MRPL1	MRPL42	0.0457983	0.620892	0.413096	0.000208326	OV_chr4	2	2	2	77	1	Non-promiscuous	Non-aggregation prone
MRPL1_MRPL43	MRPL1	MRPL43	0.267191	0.00330818	0.558956	1.02483e-10	OV_chr4	2	2	2	77	1	Non-promiscuous	Non-aggregation prone
MRPL1_MRPL44	MRPL1	MRPL44	0.323109	0.000338197	0.615845	9.05942e-14	OV_chr4	2	2	2	77	1	Non-promiscuous	Non-aggregation prone
MRPL1_MRPL45	MRPL1	MRPL45	0.174647	0.0574729	0.56994	3.63098e-11	OV_chr4	2	2	2	77	1	Non-promiscuous	Non-aggregation prone
MRPL1_MRPL46	MRPL1	MRPL46	0.253518	0.0054031	0.515542	3.18009e-09	OV_chr4	2	2	2	77	1	Non-promiscuous	Non-aggregation prone
MRPL1_MRPL47	MRPL1	MRPL47	0.292387	0.00125219	0.619713	1.19904e-13	OV_chr4	2	2	2	77	1	Non-promiscuous	Non-aggregation prone
MRPL1_MRPL48	MRPL1	MRPL48	0.132524	0.150789	0.496503	1.93045e-08	OV_chr4	2	2	2	77	1	Non-promiscuous	Non-aggregation prone
MRPL1_MRPL49	MRPL1	MRPL49	0.157876	0.0863781	0.626264	2.59792e-14	OV_chr4	2	2	2	77	1	Non-promiscuous	Non-aggregation prone
MRPL1_MRPL50	MRPL1	MRPL50	0.101111	0.273887	0.408061	7.24339e-06	OV_chr4	2	2	2	77	1	Non-promiscuous	Non-aggregation prone
MRPL1_MRPL51	MRPL1	MRPL51	0.282887	0.0018252	0.358952	0.000639713	OV_chr4	2	2	2	77	1	Non-promiscuous	Non-aggregation prone
MRPL1_MRPL53	MRPL1	MRPL53	0.0918103	0.320681	0.50252	1.41576e-08	OV_chr4	2	2	2	77	1	Non-promiscuous	Non-aggregation prone
MRPL1_MRPL54	MRPL1	MRPL54	0.407043	4.3485e-06	0.408085	0.000155753	OV_chr4	2	2	2	77	1	Non-promiscuous	Non-aggregation prone
MRPL1_MRPL55	MRPL1	MRPL55	0.291084	0.00131963	0.504201	2.20668e-07	OV_chr4	2	2	2	77	1	Non-promiscuous	Non-aggregation prone
MRPL1_MRPL9	MRPL1	MRPL9	0.0914115	0.322796	0.514299	4.41666e-08	OV_chr4	2	2	2	77	1	Non-promiscuous	Non-aggregation prone
MRPL1_MRPS10	MRPL1	MRPS10	0.181399	0.0483419	0.343203	0.00025874	OV_chr4	1	3	2	77	0.333333	Non-promiscuous	Non-aggregation prone
MRPL1_MRPS11	MRPL1	MRPS11	0.164407	0.0739837	0.216922	0.024813	OV_chr4	1	3	2	77	0.333333	Non-promiscuous	Non-aggregation prone
MRPL1_MRPS12	MRPL1	MRPS12	-0.0637302	0.491089	0.234853	0.0139653	OV_chr4	1	3	2	77	0.333333	Non-promiscuous	Non-aggregation prone
MRPL1_MRPS14	MRPL1	MRPS14	0.324961	0.00031112	0.269673	0.0340365	OV_chr4	1	3	2	77	0.333333	Non-promiscuous	Non-aggregation prone
MRPL1_MRPS15	MRPL1	MRPS15	0.304309	0.00076615	0.318118	0.000501437	OV_chr4	1	3	2	77	0.333333	Non-promiscuous	Non-aggregation prone
MRPL1_MRPS16	MRPL1	MRPS16	0.12511	0.175188	0.344574	0.000152074	OV_chr4	1	3	2	77	0.333333	Non-promiscuous	Non-aggregation prone
MRPL1_MRPS17	MRPL1	MRPS17	0.0916679	0.321435	0.444297	5.22032e-07	OV_chr4	1	3	2	77	0.333333	Non-promiscuous	Non-aggregation prone
MRPL1_MRPS18A	MRPL1	MRPS18A	0.0845748	0.360452	0.502567	2.56956e-08	OV_chr4	1	3	2	77	0.333333	Non-promiscuous	Non-aggregation prone
MRPL1_MRPS18B	MRPL1	MRPS18B	0.192715	0.035746	0.469189	1.80748e-07	OV_chr4	1	3	2	77	0.333333	Non-promiscuous	Non-aggregation prone
MRPL1_MRPS2	MRPL1	MRPS2	-0.0748184	0.418692	0.306029	0.000792068	OV_chr4	1	3	2	77	0.333333	Non-promiscuous	Non-aggregation prone
MRPL1_MRPS21	MRPL1	MRPS21	0.313061	0.000527071	0.367831	7.13797e-05	OV_chr4	1	3	2	77	0.333333	Non-promiscuous	Non-aggregation prone
MRPL1_MRPS22	MRPL1	MRPS22	0.33278	0.000217427	0.439168	5.83965e-07	OV_chr4	1	3	2	77	0.333333	Non-promiscuous	Non-aggregation prone
MRPL1_MRPS23	MRPL1	MRPS23	0.28721	0.00154009	0.335593	0.000190683	OV_chr4	1	3	2	77	0.333333	Non-promiscuous	Non-aggregation prone
MRPL1_MRPS24	MRPL1	MRPS24	0.0848383	0.358952	0.196446	0.146755	OV_chr4	1	3	2	77	0.333333	Non-promiscuous	Non-aggregation prone
MRPL1_MRPS25	MRPL1	MRPS25	-0.110312	0.232358	0.496888	9.03891e-09	OV_chr4	1	3	2	77	0.333333	Non-promiscuous	Non-aggregation prone
MRPL1_MRPS26	MRPL1	MRPS26	0.194816	0.033742	0.3959	9.9505e-06	OV_chr4	1	3	2	77	0.333333	Non-promiscuous	Non-aggregation prone
MRPL1_MRPS27	MRPL1	MRPS27	0.135657	0.141281	0.312044	0.000649677	OV_chr4	1	3	2	77	0.333333	Non-promiscuous	Non-aggregation prone
MRPL1_MRPS28	MRPL1	MRPS28	0.266401	0.00340569	0.343691	0.000181194	OV_chr4	1	3	2	77	0.333333	Non-promiscuous	Non-aggregation prone
MRPL1_MRPS30	MRPL1	MRPS30	0.0224469	0.808538	0.572052	1.97513e-11	OV_chr4	1	3	2	77	0.333333	Non-promiscuous	Non-aggregation prone
MRPL1_MRPS31	MRPL1	MRPS31	-0.0471585	0.610547	0.322183	0.000352537	OV_chr4	1	3	2	77	0.333333	Non-promiscuous	Non-aggregation prone
MRPL1_MRPS33	MRPL1	MRPS33	0.266857	0.00334916	0.267618	0.0178476	OV_chr4	1	3	2	77	0.333333	Non-promiscuous	Non-aggregation prone
MRPL1_MRPS34	MRPL1	MRPS34	0.110689	0.230754	0.427343	2.9004e-06	OV_chr4	1	3	2	77	0.333333	Non-promiscuous	Non-aggregation prone
MRPL1_MRPS35	MRPL1	MRPS35	0.293804	0.00118244	0.425929	1.36971e-06	OV_chr4	1	3	2	77	0.333333	Non-promiscuous	Non-aggregation prone
MRPL1_MRPS36	MRPL1	MRPS36	0.361394	5.38885e-05	0.221072	0.0156862	OV_chr4	1	3	2	77	0.333333	Non-promiscuous	Non-aggregation prone
MRPL1_MRPS5	MRPL1	MRPS5	-0.0824598	0.372632	0.389823	1.17466e-05	OV_chr4	1	3	2	77	0.333333	Non-promiscuous	Non-aggregation prone
MRPL1_MRPS6	MRPL1	MRPS6	0.132873	0.149707	0.322573	0.000389631	OV_chr4	1	3	2	77	0.333333	Non-promiscuous	Non-aggregation prone
MRPL1_MRPS7	MRPL1	MRPS7	0.168566	0.0668677	0.432184	1.26946e-06	OV_chr4	1	3	2	77	0.333333	Non-promiscuous	Non-aggregation prone
MRPL1_MRPS9	MRPL1	MRPS9	0.00598918	0.948457	0.478322	3.75997e-08	OV_chr4	1	3	2	77	0.333333	Non-promiscuous	Non-aggregation prone
MRPL1_MRPS31	MRPL1	MRPS31	-0.0471585	0.610547	0.322183	0.000352537	OV_chr4	1	3	2	77	0.333333	Non-promiscuous	Non-aggregation prone
MRPL1_LACTB	MRPL1	LACTB	0.0826022	0.371804	-0.0295115	0.750027	OV_chr4	2	2	2	77	1	Non-promiscuous	Non-aggregation prone
MRPL1_MRPL27	MRPL1	MRPL27	0.238898	0.00888212	0.520472	8.80349e-07	OV_chr4	2	2	2	77	1	Non-promiscuous	Non-aggregation prone
DHX15_ACIN1	DHX15	ACIN1	0.325887	0.000298346	0.330651	0.00023994	OV_chr4	1	6	5	174	0.166667	Non-promiscuous	Non-aggregation prone
DHX15_ALYREF	DHX15	ALYREF	0.127318	0.167636	0.336156	0.000185714	OV_chr4	1	10	5	174	0.1	Non-promiscuous	Non-aggregation prone
DHX15_AQR	DHX15	AQR	0.443249	4.4573e-07	0.320809	0.000374864	OV_chr4	1	6	5	174	0.166667	Non-promiscuous	Non-aggregation prone
DHX15_BCAS2	DHX15	BCAS2	0.142893	0.121072	0.297151	0.00103154	OV_chr4	1	7	5	174	0.142857	Non-promiscuous	Non-aggregation prone
DHX15_BUD13	DHX15	BUD13	0.304736	0.000752486	-0.00496278	0.962552	OV_chr4	1	5	5	174	0.2	Non-promiscuous	Non-aggregation prone
DHX15_BUD31	DHX15	BUD31	-0.00606751	0.947783	0.250235	0.00605591	OV_chr4	1	5	5	174	0.2	Non-promiscuous	Non-aggregation prone
DHX15_CACTIN	DHX15	CACTIN	0.361715	5.30124e-05	0.283429	0.0191737	OV_chr4	1	6	5	174	0.166667	Non-promiscuous	Non-aggregation prone
DHX15_CD2BP2	DHX15	CD2BP2	0.359529	5.92638e-05	0.254322	0.00681106	OV_chr4	1	5	5	174	0.2	Non-promiscuous	Non-aggregation prone
DHX15_CDC40	DHX15	CDC40	0.269057	0.00308789	0.06619	0.480224	OV_chr4	1	6	5	174	0.166667	Non-promiscuous	Non-aggregation prone
DHX15_CDC5L	DHX15	CDC5L	0.326029	0.000296424	0.330302	0.000243829	OV_chr4	1	9	5	174	0.111111	Non-promiscuous	Non-aggregation prone
DHX15_CDK12	DHX15	CDK12	0.489211	1.64654e-08	0.0282994	0.768119	OV_chr4	1	5	5	174	0.2	Non-promiscuous	Non-aggregation prone
DHX15_CFAP20	DHX15	CFAP20	0.16801	0.0677846	0.17334	0.0728053	OV_chr4	1	5	5	174	0.2	Non-promiscuous	Non-aggregation prone
DHX15_CHERP	DHX15	CHERP	0.456338	1.8293e-07	0.293256	0.001209	OV_chr4	1	5	5	174	0.2	Non-promiscuous	Non-aggregation prone
DHX15_CIRBP	DHX15	CIRBP	0.159386	0.0833748	0.246916	0.00678617	OV_chr4	1	5	5	174	0.2	Non-promiscuous	Non-aggregation prone
DHX15_CPSF6	DHX15	CPSF6	0.412534	3.13045e-06	0.320353	0.000382552	OV_chr4	1	9	5	174	0.111111	Non-promiscuous	Non-aggregation prone
DHX15_CRNKL1	DHX15	CRNKL1	0.337787	0.000171982	0.302193	0.000837196	OV_chr4	1	6	5	174	0.166667	Non-promiscuous	Non-aggregation prone
DHX15_CTNNBL1	DHX15	CTNNBL1	0.249224	0.00627066	0.281619	0.00191745	OV_chr4	1	5	5	174	0.2	Non-promiscuous	Non-aggregation prone
DHX15_CWC15	DHX15	CWC15	-0.0940322	0.309059	0.200527	0.0287672	OV_chr4	1	7	5	174	0.142857	Non-promiscuous	Non-aggregation prone
DHX15_CWC22	DHX15	CWC22	0.307841	0.000659709	0.210644	0.0264791	OV_chr4	1	6	5	174	0.166667	Non-promiscuous	Non-aggregation prone
DHX15_DDX1	DHX15	DDX1	0.2168	0.017871	0.301688	0.000855051	OV_chr4	1	6	5	174	0.166667	Non-promiscuous	Non-aggregation prone
DHX15_DDX17	DHX15	DDX17	0.398412	7.20554e-06	0.2906	0.00134552	OV_chr4	2	6	5	174	0.333333	Non-promiscuous	Non-aggregation prone
DHX15_DDX23	DHX15	DDX23	0.519029	1.47202e-09	0.388741	1.24808e-05	OV_chr4	1	7	5	174	0.142857	Non-promiscuous	Non-aggregation prone
DHX15_DDX39B	DHX15	DDX39B	0.260675	0.00419265	0.342465	0.00013764	OV_chr4	1	7	5	174	0.142857	Non-promiscuous	Non-aggregation prone
DHX15_DDX3X	DHX15	DDX3X	0.46576	9.41252e-08	0.0273038	0.768177	OV_chr4	2	6	5	174	0.333333	Non-promiscuous	Non-aggregation prone
DHX15_DDX41	DHX15	DDX41	0.19916	0.0298975	0.156576	0.107275	OV_chr4	1	6	5	174	0.166667	Non-promiscuous	Non-aggregation prone
DHX15_DDX46	DHX15	DDX46	0.380074	2.01265e-05	0.360583	5.61687e-05	OV_chr4	2	5	5	174	0.4	Non-promiscuous	Non-aggregation prone
DHX15_DDX5	DHX15	DDX5	0.290009	0.00137775	0.428999	1.12767e-06	OV_chr4	2	9	5	174	0.222222	Non-promiscuous	Non-aggregation prone
DHX15_DGCR8	DHX15	DGCR8	0.410262	3.58896e-06	0.0633769	0.652103	OV_chr4	1	10	5	174	0.1	Non-promiscuous	Non-aggregation prone
DHX15_DHX16	DHX15	DHX16	0.364442	4.60774e-05	0.0943954	0.307186	OV_chr4	1	6	5	174	0.166667	Non-promiscuous	Non-aggregation prone
DHX15_DHX38	DHX15	DHX38	0.42986	1.06739e-06	0.0224968	0.808121	OV_chr4	1	7	5	174	0.142857	Non-promiscuous	Non-aggregation prone
DHX15_DHX8	DHX15	DHX8	0.480452	3.20653e-08	0.257064	0.00621659	OV_chr4	1	6	5	174	0.166667	Non-promiscuous	Non-aggregation prone
DHX15_DHX9	DHX15	DHX9	0.574526	8.37153e-12	0.49238	1.28775e-08	OV_chr4	1	13	5	174	0.0769231	Non-promiscuous	Non-aggregation prone
DHX15_DNAJC8	DHX15	DNAJC8	-0.0224612	0.808418	0.150228	0.10294	OV_chr4	2	5	5	174	0.4	Non-promiscuous	Non-aggregation prone
DHX15_EFTUD2	DHX15	EFTUD2	0.453511	2.22435e-07	0.445442	3.84927e-07	OV_chr4	1	8	5	174	0.125	Non-promiscuous	Non-aggregation prone
DHX15_EIF4A3	DHX15	EIF4A3	0.288007	0.00149214	0.369598	3.5227e-05	OV_chr4	1	15	5	174	0.0666667	Non-promiscuous	Non-aggregation prone
DHX15_FUS	DHX15	FUS	0.321984	0.000355698	0.281413	0.00193288	OV_chr4	1	6	5	174	0.166667	Non-promiscuous	Non-aggregation prone
DHX15_GCFC2	DHX15	GCFC2	0.277503	0.00224689	0.119752	0.252895	OV_chr4	1	5	5	174	0.2	Non-promiscuous	Non-aggregation prone
DHX15_HNRNPH1	DHX15	HNRNPH1	0.298148	0.000990119	0.4309	9.98731e-07	OV_chr4	1	10	5	174	0.1	Non-promiscuous	Non-aggregation prone
DHX15_HNRNPM	DHX15	HNRNPM	0.4142	2.82999e-06	0.340678	0.000149928	OV_chr4	1	7	5	174	0.142857	Non-promiscuous	Non-aggregation prone
DHX15_HNRNPU	DHX15	HNRNPU	0.424854	1.46561e-06	0.442886	4.56642e-07	OV_chr4	1	14	5	174	0.0714286	Non-promiscuous	Non-aggregation prone
DHX15_HNRNPUL1	DHX15	HNRNPUL1	0.223878	0.0143812	0.137018	0.137299	OV_chr4	1	5	5	174	0.2	Non-promiscuous	Non-aggregation prone
DHX15_HSPD1	DHX15	HSPD1	0.216764	0.0178902	0.394901	8.81343e-06	OV_chr4	1	6	5	174	0.166667	Non-promiscuous	Non-aggregation prone
DHX15_HTATSF1	DHX15	HTATSF1	0.416949	2.39323e-06	0.00546218	0.952986	OV_chr4	1	6	5	174	0.166667	Non-promiscuous	Non-aggregation prone
DHX15_IGF2BP3	DHX15	IGF2BP3	0.0756231	0.413691	-0.0653824	0.479898	OV_chr4	1	5	5	174	0.2	Non-promiscuous	Non-aggregation prone
DHX15_IK	DHX15	IK	0.26331	0.00381224	0.39698	7.82442e-06	OV_chr4	1	5	5	174	0.2	Non-promiscuous	Non-aggregation prone
DHX15_ILF2	DHX15	ILF2	0.314941	0.00048565	0.420296	1.94746e-06	OV_chr4	1	8	5	174	0.125	Non-promiscuous	Non-aggregation prone
DHX15_ILF3	DHX15	ILF3	0.426371	1.33208e-06	0.429305	1.10588e-06	OV_chr4	1	11	5	174	0.0909091	Non-promiscuous	Non-aggregation prone
DHX15_ISY1	DHX15	ISY1	0.0711437	0.441971	0.133602	0.166058	OV_chr4	1	6	5	174	0.166667	Non-promiscuous	Non-aggregation prone
DHX15_LSM2	DHX15	LSM2	0.0286569	0.757037	0.211537	0.0209194	OV_chr4	1	9	5	174	0.111111	Non-promiscuous	Non-aggregation prone
DHX15_LSM3	DHX15	LSM3	-0.0574918	0.534563	0.194965	0.0343738	OV_chr4	1	8	5	174	0.125	Non-promiscuous	Non-aggregation prone
DHX15_LSM4	DHX15	LSM4	0.0390115	0.673584	0.315065	0.00054034	OV_chr4	1	7	5	174	0.142857	Non-promiscuous	Non-aggregation prone
DHX15_LSM7	DHX15	LSM7	-0.180124	0.0499673	0.272132	0.00402713	OV_chr4	1	7	5	174	0.142857	Non-promiscuous	Non-aggregation prone
DHX15_LUC7L3	DHX15	LUC7L3	0.0981342	0.288334	0.408304	4.03455e-06	OV_chr4	1	5	5	174	0.2	Non-promiscuous	Non-aggregation prone
DHX15_MAGOH	DHX15	MAGOH	-0.116778	0.205948	0.344794	0.000123033	OV_chr4	1	16	5	174	0.0625	Non-promiscuous	Non-aggregation prone
DHX15_MFAP1	DHX15	MFAP1	0.546069	1.33432e-10	0.346356	0.000130616	OV_chr4	1	5	5	174	0.2	Non-promiscuous	Non-aggregation prone
DHX15_MOV10	DHX15	MOV10	0.261223	0.00411079	0.178059	0.0526965	OV_chr4	1	7	5	174	0.142857	Non-promiscuous	Non-aggregation prone
DHX15_NCBP1	DHX15	NCBP1	0.427809	1.21619e-06	0.237872	0.00918764	OV_chr4	1	11	5	174	0.0909091	Non-promiscuous	Non-aggregation prone
DHX15_NCBP2	DHX15	NCBP2	0.132681	0.150302	0.18193	0.0516617	OV_chr4	1	10	5	174	0.1	Non-promiscuous	Non-aggregation prone
DHX15_NUDT21	DHX15	NUDT21	0.280857	0.00197492	0.384176	1.60797e-05	OV_chr4	1	9	5	174	0.111111	Non-promiscuous	Non-aggregation prone
DHX15_PABPC1	DHX15	PABPC1	0.157	0.0881597	0.270061	0.00297488	OV_chr4	1	10	5	174	0.1	Non-promiscuous	Non-aggregation prone
DHX15_PAXBP1	DHX15	PAXBP1	0.229462	0.0120629	0.183994	0.0510775	OV_chr4	1	5	5	174	0.2	Non-promiscuous	Non-aggregation prone
DHX15_PHF5A	DHX15	PHF5A	-0.0447728	0.62874	0.241276	0.00820771	OV_chr4	1	6	5	174	0.166667	Non-promiscuous	Non-aggregation prone
DHX15_PPIE	DHX15	PPIE	0.0833215	0.36764	0.171934	0.061521	OV_chr4	1	6	5	174	0.166667	Non-promiscuous	Non-aggregation prone
DHX15_PPIH	DHX15	PPIH	-0.122283	0.185221	0.164022	0.0746714	OV_chr4	1	5	5	174	0.2	Non-promiscuous	Non-aggregation prone
DHX15_PPIL1	DHX15	PPIL1	0.234333	0.0103144	0.360554	5.62504e-05	OV_chr4	1	6	5	174	0.166667	Non-promiscuous	Non-aggregation prone
DHX15_PPIL2	DHX15	PPIL2	0.3308	0.000238291	-0.0455226	0.671851	OV_chr4	1	5	5	174	0.2	Non-promiscuous	Non-aggregation prone
DHX15_PPIL3	DHX15	PPIL3	0.0953995	0.302045	0.159813	0.0825402	OV_chr4	1	6	5	174	0.166667	Non-promiscuous	Non-aggregation prone
DHX15_PPM1G	DHX15	PPM1G	0.398704	7.08511e-06	0.223658	0.0144803	OV_chr4	1	5	5	174	0.2	Non-promiscuous	Non-aggregation prone
DHX15_PPWD1	DHX15	PPWD1	0.356416	6.93582e-05	0.161712	0.0870451	OV_chr4	1	6	5	174	0.166667	Non-promiscuous	Non-aggregation prone
DHX15_PRPF18	DHX15	PRPF18	0.22385	0.0143939	0.208106	0.0477604	OV_chr4	1	5	5	174	0.2	Non-promiscuous	Non-aggregation prone
DHX15_PRPF19	DHX15	PRPF19	0.353974	7.83827e-05	0.374306	2.74579e-05	OV_chr4	1	8	5	174	0.125	Non-promiscuous	Non-aggregation prone
DHX15_PRPF3	DHX15	PRPF3	0.390835	1.10975e-05	0.240984	0.00828799	OV_chr4	1	5	5	174	0.2	Non-promiscuous	Non-aggregation prone
DHX15_PRPF31	DHX15	PRPF31	0.117704	0.202351	0.357485	6.5725e-05	OV_chr4	1	6	5	174	0.166667	Non-promiscuous	Non-aggregation prone
DHX15_PRPF4	DHX15	PRPF4	0.327411	0.000278369	0.24332	0.00766477	OV_chr4	1	5	5	174	0.2	Non-promiscuous	Non-aggregation prone
DHX15_PRPF40A	DHX15	PRPF40A	0.258973	0.0044561	0.318708	0.000411523	OV_chr4	1	5	5	174	0.2	Non-promiscuous	Non-aggregation prone
DHX15_PRPF4B	DHX15	PRPF4B	0.395357	8.58706e-06	0.329519	0.000252772	OV_chr4	1	6	5	174	0.166667	Non-promiscuous	Non-aggregation prone
DHX15_PRPF6	DHX15	PRPF6	0.459999	1.41644e-07	0.382923	1.72268e-05	OV_chr4	1	6	5	174	0.166667	Non-promiscuous	Non-aggregation prone
DHX15_PRPF8	DHX15	PRPF8	0.404921	4.92986e-06	0.420752	1.89323e-06	OV_chr4	2	9	5	174	0.222222	Non-promiscuous	Non-aggregation prone
DHX15_PUF60	DHX15	PUF60	0.456922	1.75651e-07	0.396582	8.00558e-06	OV_chr4	2	5	5	174	0.4	Non-promiscuous	Non-aggregation prone
DHX15_RALY	DHX15	RALY	0.125182	0.174941	0.145172	0.115193	OV_chr4	1	6	5	174	0.166667	Non-promiscuous	Non-aggregation prone
DHX15_RBM15	DHX15	RBM15	0.467512	8.30011e-08	0.249715	0.00616548	OV_chr4	1	5	5	174	0.2	Non-promiscuous	Non-aggregation prone
DHX15_RBM17	DHX15	RBM17	0.170546	0.0636813	0.176741	0.0545009	OV_chr4	2	5	5	174	0.4	Non-promiscuous	Non-aggregation prone
DHX15_RBM22	DHX15	RBM22	0.296553	0.00105715	0.286754	0.00156811	OV_chr4	1	6	5	174	0.166667	Non-promiscuous	Non-aggregation prone
DHX15_RBM25	DHX15	RBM25	0.0935408	0.311605	0.208154	0.0231066	OV_chr4	1	5	5	174	0.2	Non-promiscuous	Non-aggregation prone
DHX15_RBM39	DHX15	RBM39	0.357663	6.51371e-05	0.392394	1.01624e-05	OV_chr4	1	5	5	174	0.2	Non-promiscuous	Non-aggregation prone
DHX15_RBM8A	DHX15	RBM8A	0.391397	1.07512e-05	0.230694	0.0115978	OV_chr4	1	19	5	174	0.0526316	Non-promiscuous	Non-aggregation prone
DHX15_RNPC3	DHX15	RNPC3	0.322981	0.00034015	-0.100871	0.530319	OV_chr4	1	5	5	174	0.2	Non-promiscuous	Non-aggregation prone
DHX15_RNPS1	DHX15	RNPS1	0.279803	0.00205698	0.376171	2.48491e-05	OV_chr4	1	10	5	174	0.1	Non-promiscuous	Non-aggregation prone
DHX15_SART1	DHX15	SART1	0.190806	0.0376526	0.256438	0.004876	OV_chr4	1	6	5	174	0.166667	Non-promiscuous	Non-aggregation prone
DHX15_SF1	DHX15	SF1	0.546674	1.26139e-10	0.374541	2.71157e-05	OV_chr4	1	5	5	174	0.2	Non-promiscuous	Non-aggregation prone
DHX15_SF3A1	DHX15	SF3A1	0.406751	4.42445e-06	0.376827	2.39897e-05	OV_chr4	2	8	5	174	0.25	Non-promiscuous	Non-aggregation prone
DHX15_SF3A2	DHX15	SF3A2	0.0939396	0.309538	0.22719	0.0129635	OV_chr4	2	7	5	174	0.285714	Non-promiscuous	Non-aggregation prone
DHX15_SF3A3	DHX15	SF3A3	0.298967	0.000957238	0.274761	0.00249388	OV_chr4	2	7	5	174	0.285714	Non-promiscuous	Non-aggregation prone
DHX15_SF3B1	DHX15	SF3B1	0.486953	1.95863e-08	0.437431	6.54456e-07	OV_chr4	3	10	5	174	0.3	Non-promiscuous	Non-aggregation prone
DHX15_SF3B2	DHX15	SF3B2	0.432844	8.81452e-07	0.234724	0.010184	OV_chr4	3	8	5	174	0.375	Non-promiscuous	Non-aggregation prone
DHX15_SF3B3	DHX15	SF3B3	0.358774	6.15777e-05	0.486234	2.06945e-08	OV_chr4	3	16	5	174	0.1875	Non-promiscuous	Non-aggregation prone
DHX15_SF3B4	DHX15	SF3B4	0.252948	0.00551168	0.101852	0.27037	OV_chr4	3	7	5	174	0.428571	Non-promiscuous	Non-aggregation prone
DHX15_SF3B5	DHX15	SF3B5	-0.132681	0.150302	0.320033	0.000388043	OV_chr4	2	6	5	174	0.333333	Non-promiscuous	Non-aggregation prone
DHX15_SF3B6	DHX15	SF3B6	-0.0750961	0.416962	0.440664	5.29138e-07	OV_chr4	3	6	5	174	0.5	Non-promiscuous	Non-aggregation prone
DHX15_SLU7	DHX15	SLU7	0.0603262	0.514576	0.175137	0.0931292	OV_chr4	1	6	5	174	0.166667	Non-promiscuous	Non-aggregation prone
DHX15_SMNDC1	DHX15	SMNDC1	0.0666429	0.471454	0.0741703	0.422745	OV_chr4	2	5	5	174	0.4	Non-promiscuous	Non-aggregation prone
DHX15_SMU1	DHX15	SMU1	0.227104	0.0129985	0.35015	9.47379e-05	OV_chr4	1	5	5	174	0.2	Non-promiscuous	Non-aggregation prone
DHX15_SNRNP200	DHX15	SNRNP200	0.476528	4.29635e-08	0.434739	7.79856e-07	OV_chr4	1	7	5	174	0.142857	Non-promiscuous	Non-aggregation prone
DHX15_SNRNP27	DHX15	SNRNP27	0.0275317	0.766297	0.202724	0.0513133	OV_chr4	1	5	5	174	0.2	Non-promiscuous	Non-aggregation prone
DHX15_SNRNP40	DHX15	SNRNP40	0.163787	0.0750942	0.207513	0.0235423	OV_chr4	1	7	5	174	0.142857	Non-promiscuous	Non-aggregation prone
DHX15_SNRNP70	DHX15	SNRNP70	0.124704	0.176603	0.3118	0.000556637	OV_chr4	1	6	5	174	0.166667	Non-promiscuous	Non-aggregation prone
DHX15_SNRPA	DHX15	SNRPA	0.142622	0.121785	0.354636	7.58332e-05	OV_chr4	1	9	5	174	0.111111	Non-promiscuous	Non-aggregation prone
DHX15_SNRPA1	DHX15	SNRPA1	0.105654	0.252793	0.379818	2.04088e-05	OV_chr4	2	8	5	174	0.25	Non-promiscuous	Non-aggregation prone
DHX15_SNRPB	DHX15	SNRPB	-0.0218559	0.813486	0.203133	0.0267128	OV_chr4	3	19	5	174	0.157895	Non-promiscuous	Non-aggregation prone
DHX15_SNRPB2	DHX15	SNRPB2	-0.0788705	0.393868	0.398326	7.24115e-06	OV_chr4	2	7	5	174	0.285714	Non-promiscuous	Non-aggregation prone
DHX15_SNRPC	DHX15	SNRPC	0.0940678	0.308875	0.295307	0.00111237	OV_chr4	1	5	5	174	0.2	Non-promiscuous	Non-aggregation prone
DHX15_SNRPD1	DHX15	SNRPD1	0.0203888	0.8258	0.452272	2.42203e-07	OV_chr4	3	19	5	174	0.157895	Non-promiscuous	Non-aggregation prone
DHX15_SNRPD2	DHX15	SNRPD2	-0.349316	9.86999e-05	0.449487	2.92915e-07	OV_chr4	3	15	5	174	0.2	Non-promiscuous	Non-aggregation prone
DHX15_SNRPD3	DHX15	SNRPD3	0.177517	0.0534317	0.272404	0.00272555	OV_chr4	3	18	5	174	0.166667	Non-promiscuous	Non-aggregation prone
DHX15_SNRPE	DHX15	SNRPE	-0.056623	0.540766	0.11239	0.229682	OV_chr4	3	14	5	174	0.214286	Non-promiscuous	Non-aggregation prone
DHX15_SNRPF	DHX15	SNRPF	-0.0803091	0.385271	0.243732	0.00837586	OV_chr4	3	13	5	174	0.230769	Non-promiscuous	Non-aggregation prone
DHX15_SNRPG	DHX15	SNRPG	-0.104608	0.257551	0.402966	6.65465e-06	OV_chr4	3	13	5	174	0.230769	Non-promiscuous	Non-aggregation prone
DHX15_SNU13	DHX15	SNU13	0.0100698	0.913447	0.226912	0.0130775	OV_chr4	1	6	5	174	0.166667	Non-promiscuous	Non-aggregation prone
DHX15_SNW1	DHX15	SNW1	0.22986	0.0119106	0.363189	4.91515e-05	OV_chr4	1	8	5	174	0.125	Non-promiscuous	Non-aggregation prone
DHX15_SPEN	DHX15	SPEN	0.391141	1.09078e-05	-0.0354209	0.721114	OV_chr4	1	10	5	174	0.1	Non-promiscuous	Non-aggregation prone
DHX15_SRPK1	DHX15	SRPK1	0.431263	9.75752e-07	0.23821	0.0134812	OV_chr4	1	7	5	174	0.142857	Non-promiscuous	Non-aggregation prone
DHX15_SRRM1	DHX15	SRRM1	0.451033	2.6364e-07	0.331726	0.000228314	OV_chr4	1	13	5	174	0.0769231	Non-promiscuous	Non-aggregation prone
DHX15_SRRM2	DHX15	SRRM2	0.350755	9.1953e-05	0.295022	0.00112535	OV_chr4	1	8	5	174	0.125	Non-promiscuous	Non-aggregation prone
DHX15_SRRT	DHX15	SRRT	0.328728	0.000262104	0.310853	0.000579847	OV_chr4	1	6	5	174	0.166667	Non-promiscuous	Non-aggregation prone
DHX15_SRSF1	DHX15	SRSF1	0.420261	1.95176e-06	0.396795	7.90805e-06	OV_chr4	2	8	5	174	0.25	Non-promiscuous	Non-aggregation prone
DHX15_SRSF11	DHX15	SRSF11	0.297586	0.0010133	0.262327	0.00395034	OV_chr4	1	5	5	174	0.2	Non-promiscuous	Non-aggregation prone
DHX15_SRSF2	DHX15	SRSF2	0.230081	0.011827	0.296389	0.00106426	OV_chr4	1	6	5	174	0.166667	Non-promiscuous	Non-aggregation prone
DHX15_SRSF3	DHX15	SRSF3	0.296881	0.00104305	0.401453	6.04077e-06	OV_chr4	1	5	5	174	0.2	Non-promiscuous	Non-aggregation prone
DHX15_SRSF4	DHX15	SRSF4	0.188698	0.0398569	0.267925	0.00321994	OV_chr4	1	6	5	174	0.166667	Non-promiscuous	Non-aggregation prone
DHX15_SRSF5	DHX15	SRSF5	0.101467	0.272192	0.257883	0.00463243	OV_chr4	1	6	5	174	0.166667	Non-promiscuous	Non-aggregation prone
DHX15_SRSF6	DHX15	SRSF6	0.390301	1.1436e-05	0.278087	0.00219723	OV_chr4	1	8	5	174	0.125	Non-promiscuous	Non-aggregation prone
DHX15_SRSF7	DHX15	SRSF7	0.314877	0.000487011	0.315382	0.000476367	OV_chr4	1	6	5	174	0.166667	Non-promiscuous	Non-aggregation prone
DHX15_SRSF9	DHX15	SRSF9	0.407891	4.13498e-06	0.382417	1.7711e-05	OV_chr4	1	7	5	174	0.142857	Non-promiscuous	Non-aggregation prone
DHX15_SYF2	DHX15	SYF2	0.0939752	0.309353	0.0160262	0.882186	OV_chr4	1	6	5	174	0.166667	Non-promiscuous	Non-aggregation prone
DHX15_TAF15	DHX15	TAF15	0.142031	0.123355	0.0255234	0.782906	OV_chr4	1	6	5	174	0.166667	Non-promiscuous	Non-aggregation prone
DHX15_TARDBP	DHX15	TARDBP	0.414962	2.7019e-06	0.401396	6.06085e-06	OV_chr4	1	5	5	174	0.2	Non-promiscuous	Non-aggregation prone
DHX15_TCERG1	DHX15	TCERG1	0.239845	0.00860793	0.306103	0.000710248	OV_chr4	1	5	5	174	0.2	Non-promiscuous	Non-aggregation prone
DHX15_TFIP11	DHX15	TFIP11	0.428002	1.20144e-06	0.152954	0.107389	OV_chr4	2	8	5	174	0.25	Non-promiscuous	Non-aggregation prone
DHX15_THOC1	DHX15	THOC1	0.167084	0.0693355	0.128173	0.164779	OV_chr4	1	8	5	174	0.125	Non-promiscuous	Non-aggregation prone
DHX15_THOC2	DHX15	THOC2	0.230188	0.0117867	0.195229	0.0333593	OV_chr4	1	8	5	174	0.125	Non-promiscuous	Non-aggregation prone
DHX15_THOC3	DHX15	THOC3	0.119242	0.196474	0.0467572	0.615118	OV_chr4	1	7	5	174	0.142857	Non-promiscuous	Non-aggregation prone
DHX15_THOC5	DHX15	THOC5	0.195542	0.0330715	0.0337062	0.719447	OV_chr4	1	8	5	174	0.125	Non-promiscuous	Non-aggregation prone
DHX15_THOC6	DHX15	THOC6	0.0496795	0.591578	0.184682	0.0443566	OV_chr4	1	8	5	174	0.125	Non-promiscuous	Non-aggregation prone
DHX15_THOC7	DHX15	THOC7	-0.174747	0.0573285	-0.0386748	0.68288	OV_chr4	1	8	5	174	0.125	Non-promiscuous	Non-aggregation prone
DHX15_TRA2B	DHX15	TRA2B	0.355021	7.43886e-05	0.366095	4.22996e-05	OV_chr4	1	7	5	174	0.142857	Non-promiscuous	Non-aggregation prone
DHX15_TRAP1	DHX15	TRAP1	0.348732	0.000101568	0.332082	0.000224581	OV_chr4	1	5	5	174	0.2	Non-promiscuous	Non-aggregation prone
DHX15_TXNL4A	DHX15	TXNL4A	0.04332	0.639929	0.244568	0.0111235	OV_chr4	1	5	5	174	0.2	Non-promiscuous	Non-aggregation prone
DHX15_U2AF1	DHX15	U2AF1	0.163937	0.0748249	0.303055	0.000807553	OV_chr4	2	8	5	174	0.25	Non-promiscuous	Non-aggregation prone
DHX15_U2AF2	DHX15	U2AF2	0.312206	0.000546953	0.329917	0.000248182	OV_chr4	2	7	5	174	0.285714	Non-promiscuous	Non-aggregation prone
DHX15_U2SURP	DHX15	U2SURP	0.170802	0.0632779	0.262334	0.00394932	OV_chr4	2	5	5	174	0.4	Non-promiscuous	Non-aggregation prone
DHX15_USP39	DHX15	USP39	0.21707	0.0177252	0.293135	0.00121494	OV_chr4	1	5	5	174	0.2	Non-promiscuous	Non-aggregation prone
DHX15_WBP11	DHX15	WBP11	0.201731	0.0278025	0.130494	0.157199	OV_chr4	1	5	5	174	0.2	Non-promiscuous	Non-aggregation prone
DHX15_WTAP	DHX15	WTAP	0.0124982	0.892686	0.354771	7.5322e-05	OV_chr4	1	6	5	174	0.166667	Non-promiscuous	Non-aggregation prone
DHX15_XAB2	DHX15	XAB2	0.323672	0.000329748	0.217476	0.0175084	OV_chr4	1	6	5	174	0.166667	Non-promiscuous	Non-aggregation prone
DHX15_YBX1	DHX15	YBX1	0.115304	0.21177	0.0506338	0.584468	OV_chr4	1	10	5	174	0.1	Non-promiscuous	Non-aggregation prone
DHX15_ZCRB1	DHX15	ZCRB1	0.0689503	0.456207	0.113898	0.378072	OV_chr4	1	5	5	174	0.2	Non-promiscuous	Non-aggregation prone
DHX15_ZNF207	DHX15	ZNF207	0.508482	3.5514e-09	0.241931	0.00803008	OV_chr4	1	5	5	174	0.2	Non-promiscuous	Non-aggregation prone
DHX15_SNRPD1	DHX15	SNRPD1	0.0203888	0.8258	0.452272	2.42203e-07	OV_chr4	3	19	5	174	0.157895	Non-promiscuous	Non-aggregation prone
DHX15_SRSF2	DHX15	SRSF2	0.230081	0.011827	0.296389	0.00106426	OV_chr4	1	6	5	174	0.166667	Non-promiscuous	Non-aggregation prone
DHX15_LUC7L3	DHX15	LUC7L3	0.0981342	0.288334	0.408304	4.03455e-06	OV_chr4	1	5	5	174	0.2	Non-promiscuous	Non-aggregation prone
DHX15_DGCR8	DHX15	DGCR8	0.410262	3.58896e-06	0.0633769	0.652103	OV_chr4	1	10	5	174	0.1	Non-promiscuous	Non-aggregation prone
DHX15_SNU13	DHX15	SNU13	0.0100698	0.913447	0.226912	0.0130775	OV_chr4	1	6	5	174	0.166667	Non-promiscuous	Non-aggregation prone
DHX15_PPIL2	DHX15	PPIL2	0.3308	0.000238291	-0.0455226	0.671851	OV_chr4	1	5	5	174	0.2	Non-promiscuous	Non-aggregation prone
EWSR1_DHX15	EWSR1	DHX15	0.317852	0.000952646	0.295345	0.00222301	BRCA_chr22	1	6	2	24	0.166667	Non-promiscuous	Non-aggregation prone
EWSR1_CPSF6	EWSR1	CPSF6	0.418578	8.84627e-06	0.312876	0.00115552	BRCA_chr22	1	6	2	24	0.166667	Non-promiscuous	Non-aggregation prone
EWSR1_DDX1	EWSR1	DDX1	0.171439	0.0803483	0.436367	3.26572e-06	BRCA_chr22	1	3	2	24	0.333333	Non-promiscuous	Non-aggregation prone
EWSR1_DDX3X	EWSR1	DDX3X	0.177338	0.0703281	0.0311113	0.752719	BRCA_chr22	1	4	2	24	0.25	Non-promiscuous	Non-aggregation prone
EWSR1_DDX5	EWSR1	DDX5	0.374404	8.33065e-05	0.16639	0.0898045	BRCA_chr22	1	7	2	24	0.142857	Non-promiscuous	Non-aggregation prone
EWSR1_DHX15	EWSR1	DHX15	0.317852	0.000952646	0.295345	0.00222301	BRCA_chr22	1	6	2	24	0.166667	Non-promiscuous	Non-aggregation prone
EWSR1_DROSHA	EWSR1	DROSHA	0.255163	0.0086147	-0.0729836	0.459364	BRCA_chr22	1	4	2	24	0.25	Non-promiscuous	Non-aggregation prone
EWSR1_FUS	EWSR1	FUS	0.398839	2.50654e-05	0.190006	0.0522095	BRCA_chr22	1	3	2	24	0.333333	Non-promiscuous	Non-aggregation prone
EWSR1_HNRNPDL	EWSR1	HNRNPDL	0.48248	1.86832e-07	0.304634	0.00157954	BRCA_chr22	1	2	2	24	0.5	Non-promiscuous	Non-aggregation prone
EWSR1_HNRNPH1	EWSR1	HNRNPH1	0.432532	4.06795e-06	0.456448	9.88912e-07	BRCA_chr22	1	7	2	24	0.142857	Non-promiscuous	Non-aggregation prone
EWSR1_HNRNPM	EWSR1	HNRNPM	0.579235	9.59002e-11	0.0989426	0.315287	BRCA_chr22	1	4	2	24	0.25	Non-promiscuous	Non-aggregation prone
EWSR1_HNRNPU	EWSR1	HNRNPU	0.367873	0.000113042	0.341758	0.000359546	BRCA_chr22	1	11	2	24	0.0909091	Non-promiscuous	Non-aggregation prone
EWSR1_HNRNPUL1	EWSR1	HNRNPUL1	0.311611	0.00121301	-0.157101	0.109489	BRCA_chr22	1	2	2	24	0.5	Non-promiscuous	Non-aggregation prone
EWSR1_ILF2	EWSR1	ILF2	0.153618	0.117682	0.439809	2.67538e-06	BRCA_chr22	1	5	2	24	0.2	Non-promiscuous	Non-aggregation prone
EWSR1_ILF3	EWSR1	ILF3	0.383641	5.34968e-05	-0.0187746	0.849234	BRCA_chr22	1	8	2	24	0.125	Non-promiscuous	Non-aggregation prone
EWSR1_ITCH	EWSR1	ITCH	0.153162	0.11879	-0.0249015	0.800926	BRCA_chr22	1	6	2	24	0.166667	Non-promiscuous	Non-aggregation prone
EWSR1_NUDT21	EWSR1	NUDT21	0.245024	0.0117615	0.35451	0.000206914	BRCA_chr22	1	6	2	24	0.166667	Non-promiscuous	Non-aggregation prone
EWSR1_RALY	EWSR1	RALY	0.277099	0.00421381	-0.0935621	0.342451	BRCA_chr22	1	3	2	24	0.333333	Non-promiscuous	Non-aggregation prone
EWSR1_SRPK1	EWSR1	SRPK1	0.148611	0.130281	-0.102519	0.298025	BRCA_chr22	1	4	2	24	0.25	Non-promiscuous	Non-aggregation prone
EWSR1_TAF15	EWSR1	TAF15	0.514991	1.90157e-08	-0.0193552	0.844629	BRCA_chr22	1	3	2	24	0.333333	Non-promiscuous	Non-aggregation prone
EWSR1_TARDBP	EWSR1	TARDBP	0.484408	1.6422e-07	0.323429	0.00076426	BRCA_chr22	1	2	2	24	0.5	Non-promiscuous	Non-aggregation prone
EWSR1_UBAP2L	EWSR1	UBAP2L	0.0407215	0.680011	0.168007	0.0866838	BRCA_chr22	1	4	2	24	0.25	Non-promiscuous	Non-aggregation prone
LYAR_BRIX1	LYAR	BRIX1	0.152436	0.0979224	0.222853	0.0148468	OV_chr4	1	1	1	104	1	Non-promiscuous	Non-aggregation prone
LYAR_DDX21	LYAR	DDX21	0.0877083	0.342867	0.244125	0.00745987	OV_chr4	1	4	1	104	0.25	Non-promiscuous	Non-aggregation prone
LYAR_DHX9	LYAR	DHX9	0.227881	0.0126836	0.237089	0.00942723	OV_chr4	1	9	1	104	0.111111	Non-promiscuous	Non-aggregation prone
LYAR_EBNA1BP2	LYAR	EBNA1BP2	0.206844	0.024005	0.312135	0.000548641	OV_chr4	1	1	1	104	1	Non-promiscuous	Non-aggregation prone
LYAR_EEF1A1	LYAR	EEF1A1	-0.0363481	0.694722	-0.195449	0.0331563	OV_chr4	1	2	1	104	0.5	Non-promiscuous	Non-aggregation prone
LYAR_EEF2	LYAR	EEF2	0.0226463	0.80687	-0.0520937	0.573667	OV_chr4	1	1	1	104	1	Non-promiscuous	Non-aggregation prone
LYAR_FBL	LYAR	FBL	0.0638869	0.490022	0.350869	9.14375e-05	OV_chr4	1	4	1	104	0.25	Non-promiscuous	Non-aggregation prone
LYAR_GNL3	LYAR	GNL3	0.259343	0.00439755	0.380302	1.98786e-05	OV_chr4	1	1	1	104	1	Non-promiscuous	Non-aggregation prone
LYAR_H1FX	LYAR	H1FX	0.187865	0.0407576	0.116971	0.205197	OV_chr4	1	1	1	104	1	Non-promiscuous	Non-aggregation prone
LYAR_HIST1H1D	LYAR	HIST1H1D	-0.067234	0.467522	0.0876371	0.343261	OV_chr4	1	2	1	104	0.5	Non-promiscuous	Non-aggregation prone
LYAR_HNRNPA1	LYAR	HNRNPA1	0.172162	0.0611723	0.277674	0.00223225	OV_chr4	1	2	1	104	0.5	Non-promiscuous	Non-aggregation prone
LYAR_HNRNPM	LYAR	HNRNPM	0.179618	0.0506244	0.151887	0.0991504	OV_chr4	1	3	1	104	0.333333	Non-promiscuous	Non-aggregation prone
LYAR_HNRNPU	LYAR	HNRNPU	0.165361	0.0722991	0.140108	0.128568	OV_chr4	1	10	1	104	0.1	Non-promiscuous	Non-aggregation prone
LYAR_ILF2	LYAR	ILF2	0.0605825	0.512788	0.217654	0.0174141	OV_chr4	1	4	1	104	0.25	Non-promiscuous	Non-aggregation prone
LYAR_ILF3	LYAR	ILF3	0.179305	0.0510352	0.214528	0.0191362	OV_chr4	1	7	1	104	0.142857	Non-promiscuous	Non-aggregation prone
LYAR_MYBBP1A	LYAR	MYBBP1A	0.162833	0.076831	0.455249	1.97289e-07	OV_chr4	1	3	1	104	0.333333	Non-promiscuous	Non-aggregation prone
LYAR_NAP1L1	LYAR	NAP1L1	0.163908	0.0748762	-0.0441319	0.633666	OV_chr4	1	1	1	104	1	Non-promiscuous	Non-aggregation prone
LYAR_NCL	LYAR	NCL	0.25955	0.0043652	0.44238	4.72257e-07	OV_chr4	1	8	1	104	0.125	Non-promiscuous	Non-aggregation prone
LYAR_NOLC1	LYAR	NOLC1	0.19238	0.0360744	0.309087	0.000625518	OV_chr4	1	1	1	104	1	Non-promiscuous	Non-aggregation prone
LYAR_NOP56	LYAR	NOP56	0.348732	0.000101568	0.352614	8.38715e-05	OV_chr4	1	1	1	104	1	Non-promiscuous	Non-aggregation prone
LYAR_NOP58	LYAR	NOP58	0.254679	0.00518775	0.342857	0.000135075	OV_chr4	1	1	1	104	1	Non-promiscuous	Non-aggregation prone
LYAR_NPM1	LYAR	NPM1	0.10277	0.26605	0.395001	8.76343e-06	OV_chr4	1	9	1	104	0.111111	Non-promiscuous	Non-aggregation prone
LYAR_PWP1	LYAR	PWP1	0.118024	0.201116	0.109937	0.240073	OV_chr4	1	1	1	104	1	Non-promiscuous	Non-aggregation prone
LYAR_RBM28	LYAR	RBM28	0.21054	0.0215447	0.270011	0.0029804	OV_chr4	1	1	1	104	1	Non-promiscuous	Non-aggregation prone
LYAR_RPL10	LYAR	RPL10	-0.242166	0.0079672	0.0577411	0.53279	OV_chr4	1	3	1	104	0.333333	Non-promiscuous	Non-aggregation prone
LYAR_RPL10A	LYAR	RPL10A	-0.120937	0.190142	0.166878	0.0696854	OV_chr4	1	4	1	104	0.25	Non-promiscuous	Non-aggregation prone
LYAR_RPL11	LYAR	RPL11	-0.0237858	0.797356	0.17348	0.0591878	OV_chr4	1	4	1	104	0.25	Non-promiscuous	Non-aggregation prone
LYAR_RPL12	LYAR	RPL12	-0.0538955	0.560467	0.0843683	0.36163	OV_chr4	1	4	1	104	0.25	Non-promiscuous	Non-aggregation prone
LYAR_RPL13	LYAR	RPL13	-0.0314058	0.734561	0.192893	0.0355724	OV_chr4	1	4	1	104	0.25	Non-promiscuous	Non-aggregation prone
LYAR_RPL13A	LYAR	RPL13A	-0.196738	0.0319917	0.165774	0.0715797	OV_chr4	1	4	1	104	0.25	Non-promiscuous	Non-aggregation prone
LYAR_RPL14	LYAR	RPL14	-0.00272753	0.976514	0.139588	0.130006	OV_chr4	1	4	1	104	0.25	Non-promiscuous	Non-aggregation prone
LYAR_RPL15	LYAR	RPL15	-0.0738499	0.424758	0.0863481	0.350433	OV_chr4	1	4	1	104	0.25	Non-promiscuous	Non-aggregation prone
LYAR_RPL17	LYAR	RPL17	-0.120439	0.191989	0.160155	0.0818773	OV_chr4	1	3	1	104	0.333333	Non-promiscuous	Non-aggregation prone
LYAR_RPL18	LYAR	RPL18	-0.191803	0.0366462	0.237466	0.00931111	OV_chr4	1	3	1	104	0.333333	Non-promiscuous	Non-aggregation prone
LYAR_RPL18A	LYAR	RPL18A	-0.141988	0.123469	0.0710084	0.442842	OV_chr4	1	4	1	104	0.25	Non-promiscuous	Non-aggregation prone
LYAR_RPL21	LYAR	RPL21	-0.156545	0.0890982	0.164485	0.0738442	OV_chr4	1	4	1	104	0.25	Non-promiscuous	Non-aggregation prone
LYAR_RPL22	LYAR	RPL22	0.154209	0.0940333	0.185885	0.042966	OV_chr4	1	3	1	104	0.333333	Non-promiscuous	Non-aggregation prone
LYAR_RPL23	LYAR	RPL23	-0.140806	0.126656	0.212035	0.0206126	OV_chr4	1	3	1	104	0.333333	Non-promiscuous	Non-aggregation prone
LYAR_RPL23A	LYAR	RPL23A	-0.175303	0.0565289	0.148433	0.107166	OV_chr4	1	3	1	104	0.333333	Non-promiscuous	Non-aggregation prone
LYAR_RPL24	LYAR	RPL24	-0.135244	0.142508	0.146268	0.112443	OV_chr4	1	3	1	104	0.333333	Non-promiscuous	Non-aggregation prone
LYAR_RPL27	LYAR	RPL27	-0.110177	0.232934	0.287366	0.00153056	OV_chr4	1	4	1	104	0.25	Non-promiscuous	Non-aggregation prone
LYAR_RPL27A	LYAR	RPL27A	-0.0792266	0.39173	0.109258	0.236877	OV_chr4	1	3	1	104	0.333333	Non-promiscuous	Non-aggregation prone
LYAR_RPL28	LYAR	RPL28	-0.119819	0.194302	0.186669	0.0420805	OV_chr4	1	4	1	104	0.25	Non-promiscuous	Non-aggregation prone
LYAR_RPL29	LYAR	RPL29	-0.0529412	0.56744	0.126008	0.172089	OV_chr4	1	3	1	104	0.333333	Non-promiscuous	Non-aggregation prone
LYAR_RPL3	LYAR	RPL3	0.0264635	0.775119	0.198277	0.0306474	OV_chr4	1	3	1	104	0.333333	Non-promiscuous	Non-aggregation prone
LYAR_RPL30	LYAR	RPL30	-0.0789346	0.393483	0.13048	0.157245	OV_chr4	1	6	1	104	0.166667	Non-promiscuous	Non-aggregation prone
LYAR_RPL31	LYAR	RPL31	0.0037103	0.968055	0.260533	0.00421414	OV_chr4	1	3	1	104	0.333333	Non-promiscuous	Non-aggregation prone
LYAR_RPL32	LYAR	RPL32	-0.0732944	0.428259	0.144431	0.117079	OV_chr4	1	4	1	104	0.25	Non-promiscuous	Non-aggregation prone
LYAR_RPL35	LYAR	RPL35	-0.0115724	0.900593	0.131014	0.155538	OV_chr4	1	3	1	104	0.333333	Non-promiscuous	Non-aggregation prone
LYAR_RPL35A	LYAR	RPL35A	-0.0255733	0.782493	0.280352	0.00201391	OV_chr4	1	4	1	104	0.25	Non-promiscuous	Non-aggregation prone
LYAR_RPL36	LYAR	RPL36	-0.093961	0.309427	0.295948	0.00108365	OV_chr4	1	4	1	104	0.25	Non-promiscuous	Non-aggregation prone
LYAR_RPL36A	LYAR	RPL36A	-0.0624199	0.500063	0.173067	0.0598042	OV_chr4	1	3	1	104	0.333333	Non-promiscuous	Non-aggregation prone
LYAR_RPL37A	LYAR	RPL37A	-0.0556901	0.547466	0.161195	0.0798872	OV_chr4	1	4	1	104	0.25	Non-promiscuous	Non-aggregation prone
LYAR_RPL39	LYAR	RPL39	-0.0228101	0.8055	0.186583	0.111445	OV_chr4	1	3	1	104	0.333333	Non-promiscuous	Non-aggregation prone
LYAR_RPL4	LYAR	RPL4	0.0880003	0.341257	0.23664	0.00956691	OV_chr4	1	4	1	104	0.25	Non-promiscuous	Non-aggregation prone
LYAR_RPL5	LYAR	RPL5	-0.108104	0.241895	0.175125	0.0567842	OV_chr4	1	3	1	104	0.333333	Non-promiscuous	Non-aggregation prone
LYAR_RPL6	LYAR	RPL6	0.0706666	0.445046	0.19154	0.03691	OV_chr4	1	5	1	104	0.2	Non-promiscuous	Non-aggregation prone
LYAR_RPL7	LYAR	RPL7	-0.0299388	0.74653	0.130772	0.15631	OV_chr4	1	4	1	104	0.25	Non-promiscuous	Non-aggregation prone
LYAR_RPL7A	LYAR	RPL7A	-0.0966529	0.295709	0.189595	0.0389057	OV_chr4	1	5	1	104	0.2	Non-promiscuous	Non-aggregation prone
LYAR_RPL8	LYAR	RPL8	-0.10809	0.241957	0.243989	0.00749398	OV_chr4	1	4	1	104	0.25	Non-promiscuous	Non-aggregation prone
LYAR_RPLP0	LYAR	RPLP0	-0.0125267	0.892443	0.112954	0.221294	OV_chr4	1	3	1	104	0.333333	Non-promiscuous	Non-aggregation prone
LYAR_RPLP1	LYAR	RPLP1	0.017177	0.852903	0.0744267	0.421139	OV_chr4	1	4	1	104	0.25	Non-promiscuous	Non-aggregation prone
LYAR_RPLP2	LYAR	RPLP2	-0.0100983	0.913203	0.125595	0.173511	OV_chr4	1	4	1	104	0.25	Non-promiscuous	Non-aggregation prone
LYAR_RPS11	LYAR	RPS11	-0.176058	0.0554571	0.141483	0.124824	OV_chr4	1	5	1	104	0.2	Non-promiscuous	Non-aggregation prone
LYAR_RPS12	LYAR	RPS12	-0.0841333	0.362974	0.0390471	0.673303	OV_chr4	1	4	1	104	0.25	Non-promiscuous	Non-aggregation prone
LYAR_RPS13	LYAR	RPS13	-0.112164	0.224564	0.154878	0.0925974	OV_chr4	1	6	1	104	0.166667	Non-promiscuous	Non-aggregation prone
LYAR_RPS14	LYAR	RPS14	-0.178415	0.0522173	0.174605	0.0575349	OV_chr4	1	4	1	104	0.25	Non-promiscuous	Non-aggregation prone
LYAR_RPS15	LYAR	RPS15	-0.0161515	0.861595	0.136245	0.142994	OV_chr4	1	4	1	104	0.25	Non-promiscuous	Non-aggregation prone
LYAR_RPS15A	LYAR	RPS15A	-0.024327	0.792848	0.0607606	0.511547	OV_chr4	1	4	1	104	0.25	Non-promiscuous	Non-aggregation prone
LYAR_RPS16	LYAR	RPS16	-0.0775744	0.401711	0.112107	0.224801	OV_chr4	1	4	1	104	0.25	Non-promiscuous	Non-aggregation prone
LYAR_RPS17	LYAR	RPS17	0.0646632	0.484753	0.241753	0.00807801	OV_chr4	1	4	1	104	0.25	Non-promiscuous	Non-aggregation prone
LYAR_RPS18	LYAR	RPS18	-0.0377938	0.683218	0.198205	0.0307086	OV_chr4	1	4	1	104	0.25	Non-promiscuous	Non-aggregation prone
LYAR_RPS2	LYAR	RPS2	0.0154892	0.867217	0.146218	0.112567	OV_chr4	1	4	1	104	0.25	Non-promiscuous	Non-aggregation prone
LYAR_RPS23	LYAR	RPS23	-0.0224256	0.808716	0.130017	0.158735	OV_chr4	1	4	1	104	0.25	Non-promiscuous	Non-aggregation prone
LYAR_RPS24	LYAR	RPS24	-0.121201	0.189172	0.112014	0.225187	OV_chr4	1	4	1	104	0.25	Non-promiscuous	Non-aggregation prone
LYAR_RPS29	LYAR	RPS29	-0.0796325	0.3893	0.204933	0.0266591	OV_chr4	1	4	1	104	0.25	Non-promiscuous	Non-aggregation prone
LYAR_RPS6	LYAR	RPS6	-0.17573	0.0559202	0.244239	0.00743126	OV_chr4	1	5	1	104	0.2	Non-promiscuous	Non-aggregation prone
LYAR_RPS7	LYAR	RPS7	-0.0435907	0.637839	0.250876	0.00592321	OV_chr4	1	4	1	104	0.25	Non-promiscuous	Non-aggregation prone
LYAR_RPS8	LYAR	RPS8	-0.0705313	0.44592	0.247921	0.00655737	OV_chr4	1	4	1	104	0.25	Non-promiscuous	Non-aggregation prone
LYAR_RPS9	LYAR	RPS9	-0.116479	0.20712	0.0615938	0.505763	OV_chr4	1	4	1	104	0.25	Non-promiscuous	Non-aggregation prone
LYAR_RSL1D1	LYAR	RSL1D1	0.226221	0.0133649	0.467077	8.56361e-08	OV_chr4	1	1	1	104	1	Non-promiscuous	Non-aggregation prone
LYAR_SCYL2	LYAR	SCYL2	0.120709	0.190985	0.0887623	0.337076	OV_chr4	1	1	1	104	1	Non-promiscuous	Non-aggregation prone
LYAR_SLC25A5	LYAR	SLC25A5	-0.0145991	0.874784	0.08048	0.384257	OV_chr4	1	4	1	104	0.25	Non-promiscuous	Non-aggregation prone
LYAR_SNU13	LYAR	SNU13	0.189645	0.0388535	0.303297	0.000799399	OV_chr4	1	2	1	104	0.5	Non-promiscuous	Non-aggregation prone
LYAR_SRP14	LYAR	SRP14	0.0634169	0.493227	0.29159	0.00129308	OV_chr4	1	1	1	104	1	Non-promiscuous	Non-aggregation prone
LYAR_SRPK1	LYAR	SRPK1	0.28815	0.00148372	0.230412	0.0169576	OV_chr4	1	3	1	104	0.333333	Non-promiscuous	Non-aggregation prone
LYAR_TCOF1	LYAR	TCOF1	0.135757	0.140987	0.286754	0.00156811	OV_chr4	1	1	1	104	1	Non-promiscuous	Non-aggregation prone
LYAR_TOP1	LYAR	TOP1	0.145421	0.114563	0.208845	0.0226446	OV_chr4	1	8	1	104	0.125	Non-promiscuous	Non-aggregation prone
LYAR_TUBB1	LYAR	TUBB1	-0.0750036	0.417539	-0.0777382	0.400715	OV_chr4	1	2	1	104	0.5	Non-promiscuous	Non-aggregation prone
LYAR_TUFM	LYAR	TUFM	0.245471	0.00712799	0.203867	0.0261577	OV_chr4	1	1	1	104	1	Non-promiscuous	Non-aggregation prone
LYAR_U2AF1	LYAR	U2AF1	0.0112804	0.903089	0.112413	0.223529	OV_chr4	1	5	1	104	0.2	Non-promiscuous	Non-aggregation prone
LYAR_U2AF2	LYAR	U2AF2	0.166144	0.0709396	0.266857	0.00334916	OV_chr4	1	4	1	104	0.25	Non-promiscuous	Non-aggregation prone
LYAR_YBX1	LYAR	YBX1	0.189197	0.0393261	0.181413	0.048324	OV_chr4	1	6	1	104	0.166667	Non-promiscuous	Non-aggregation prone
LYAR_SNU13	LYAR	SNU13	0.189645	0.0388535	0.303297	0.000799399	OV_chr4	1	2	1	104	0.5	Non-promiscuous	Non-aggregation prone
LYAR_SRP14	LYAR	SRP14	0.0634169	0.493227	0.29159	0.00129308	OV_chr4	1	1	1	104	1	Non-promiscuous	Non-aggregation prone
RPL19_LYAR	RPL19	LYAR	-0.193645	0.0477827	0.501016	5.22806e-08	BRCA_chr17	1	4	4	128	0.25	Non-promiscuous	Non-aggregation prone
RPL19_ACTA2	RPL19	ACTA2	0.0729422	0.45962	-0.117707	0.231751	BRCA_chr17	1	5	4	128	0.2	Non-promiscuous	Non-aggregation prone
RPL19_ACTG2	RPL19	ACTG2	-0.122216	0.21423	-0.147045	0.134425	BRCA_chr17	1	4	4	128	0.25	Non-promiscuous	Non-aggregation prone
RPL19_BRIX1	RPL19	BRIX1	-0.0371449	0.706771	0.201379	0.0394013	BRCA_chr17	1	4	4	128	0.25	Non-promiscuous	Non-aggregation prone
RPL19_DDX21	RPL19	DDX21	-0.116639	0.236042	0.120537	0.220642	BRCA_chr17	1	7	4	128	0.142857	Non-promiscuous	Non-aggregation prone
RPL19_DHX9	RPL19	DHX9	-0.0261145	0.791444	-0.469614	4.33114e-07	BRCA_chr17	1	12	4	128	0.0833333	Non-promiscuous	Non-aggregation prone
RPL19_DICER1	RPL19	DICER1	-0.0584802	0.553464	-0.314794	0.00107308	BRCA_chr17	1	9	4	128	0.111111	Non-promiscuous	Non-aggregation prone
RPL19_EBNA1BP2	RPL19	EBNA1BP2	-0.0638296	0.517704	0.492121	9.72395e-08	BRCA_chr17	1	4	4	128	0.25	Non-promiscuous	Non-aggregation prone
RPL19_EEF1A1	RPL19	EEF1A1	0.0650218	0.509898	-0.701389	0	BRCA_chr17	1	5	4	128	0.2	Non-promiscuous	Non-aggregation prone
RPL19_EEF2	RPL19	EEF2	0.204551	0.0363384	-0.0458739	0.642156	BRCA_chr17	1	4	4	128	0.25	Non-promiscuous	Non-aggregation prone
RPL19_EIF6	RPL19	EIF6	-0.0236989	0.810355	-0.680603	1.33227e-15	BRCA_chr17	1	5	4	128	0.2	Non-promiscuous	Non-aggregation prone
RPL19_FAU	RPL19	FAU	0.157806	0.107886	-0.0144723	0.883503	BRCA_chr17	1	6	4	128	0.166667	Non-promiscuous	Non-aggregation prone
RPL19_FBL	RPL19	FBL	-0.0342007	0.729073	-0.0107091	0.913658	BRCA_chr17	1	7	4	128	0.142857	Non-promiscuous	Non-aggregation prone
RPL19_GNL3	RPL19	GNL3	-0.0580344	0.556497	-0.134564	0.171126	BRCA_chr17	1	4	4	128	0.25	Non-promiscuous	Non-aggregation prone
RPL19_H1FX	RPL19	H1FX	0.202872	0.037934	0.808874	0	BRCA_chr17	1	4	4	128	0.25	Non-promiscuous	Non-aggregation prone
RPL19_HIST1H1D	RPL19	HIST1H1D	0.0252926	0.797866	0.774383	0	BRCA_chr17	1	5	4	128	0.2	Non-promiscuous	Non-aggregation prone
RPL19_HNRNPA1	RPL19	HNRNPA1	0.21074	0.0309363	0.444972	1.97564e-06	BRCA_chr17	1	5	4	128	0.2	Non-promiscuous	Non-aggregation prone
RPL19_HNRNPM	RPL19	HNRNPM	-0.000466515	0.996232	0.406863	1.6544e-05	BRCA_chr17	1	6	4	128	0.166667	Non-promiscuous	Non-aggregation prone
RPL19_HNRNPU	RPL19	HNRNPU	0.040141	0.684329	-0.190483	0.0516107	BRCA_chr17	1	13	4	128	0.0769231	Non-promiscuous	Non-aggregation prone
RPL19_ILF2	RPL19	ILF2	-0.313197	0.00114132	-0.653431	4.17444e-14	BRCA_chr17	1	7	4	128	0.142857	Non-promiscuous	Non-aggregation prone
RPL19_ILF3	RPL19	ILF3	-0.0758864	0.441652	0.351742	0.000233747	BRCA_chr17	1	10	4	128	0.1	Non-promiscuous	Non-aggregation prone
RPL19_LUC7L2	RPL19	LUC7L2	-0.0246112	0.803199	0.695884	2.22045e-16	BRCA_chr17	1	4	4	128	0.25	Non-promiscuous	Non-aggregation prone
RPL19_LYAR	RPL19	LYAR	-0.193645	0.0477827	0.501016	5.22806e-08	BRCA_chr17	1	4	4	128	0.25	Non-promiscuous	Non-aggregation prone
RPL19_MOV10	RPL19	MOV10	-0.0912399	0.354617	-0.20622	0.0348089	BRCA_chr17	1	6	4	128	0.166667	Non-promiscuous	Non-aggregation prone
RPL19_NAP1L1	RPL19	NAP1L1	0.199658	0.0411513	-0.679442	1.77636e-15	BRCA_chr17	1	4	4	128	0.25	Non-promiscuous	Non-aggregation prone
RPL19_NCL	RPL19	NCL	-0.0274829	0.780784	0.586253	5.00979e-11	BRCA_chr17	1	11	4	128	0.0909091	Non-promiscuous	Non-aggregation prone
RPL19_NOLC1	RPL19	NOLC1	0.0171988	0.861756	0.72514	0	BRCA_chr17	1	4	4	128	0.25	Non-promiscuous	Non-aggregation prone
RPL19_NOP56	RPL19	NOP56	0.0437072	0.657971	0.523637	9.93822e-09	BRCA_chr17	1	4	4	128	0.25	Non-promiscuous	Non-aggregation prone
RPL19_NOP58	RPL19	NOP58	-0.150446	0.12555	0.33843	0.000413734	BRCA_chr17	1	4	4	128	0.25	Non-promiscuous	Non-aggregation prone
RPL19_NPM1	RPL19	NPM1	0.260585	0.00725761	-0.400498	2.30227e-05	BRCA_chr17	1	12	4	128	0.0833333	Non-promiscuous	Non-aggregation prone
RPL19_PWP1	RPL19	PWP1	0.0973979	0.322939	-0.33306	0.000517228	BRCA_chr17	1	4	4	128	0.25	Non-promiscuous	Non-aggregation prone
RPL19_RBM28	RPL19	RBM28	-0.154862	0.114703	0.605754	7.58238e-12	BRCA_chr17	1	4	4	128	0.25	Non-promiscuous	Non-aggregation prone
RPL19_RPL10	RPL19	RPL10	0.105038	0.286246	0.633651	4.02789e-13	BRCA_chr17	3	4	4	128	0.75	Non-promiscuous	Non-aggregation prone
RPL19_RPL10A	RPL19	RPL10A	0.218122	0.0253968	0.266245	0.00604595	BRCA_chr17	4	4	4	128	1	Non-promiscuous	Non-aggregation prone
RPL19_RPL11	RPL19	RPL11	0.13615	0.16609	-0.464047	6.16655e-07	BRCA_chr17	4	4	4	128	1	Non-promiscuous	Non-aggregation prone
RPL19_RPL12	RPL19	RPL12	0.225441	0.0207624	0.361186	0.000153482	BRCA_chr17	4	4	4	128	1	Non-promiscuous	Non-aggregation prone
RPL19_RPL13	RPL19	RPL13	0.165861	0.0908438	0.920578	0	BRCA_chr17	4	4	4	128	1	Non-promiscuous	Non-aggregation prone
RPL19_RPL13A	RPL19	RPL13A	0.171957	0.0794244	0.828229	0	BRCA_chr17	3	5	4	128	0.6	Non-promiscuous	Non-aggregation prone
RPL19_RPL14	RPL19	RPL14	0.237549	0.0146851	0.725358	0	BRCA_chr17	4	4	4	128	1	Non-promiscuous	Non-aggregation prone
RPL19_RPL15	RPL19	RPL15	0.235497	0.015591	0.855495	0	BRCA_chr17	4	4	4	128	1	Non-promiscuous	Non-aggregation prone
RPL19_RPL17	RPL19	RPL17	0.0447232	0.650536	0.798486	0	BRCA_chr17	3	4	4	128	0.75	Non-promiscuous	Non-aggregation prone
RPL19_RPL18	RPL19	RPL18	0.183247	0.0613281	0.883641	0	BRCA_chr17	3	4	4	128	0.75	Non-promiscuous	Non-aggregation prone
RPL19_RPL18A	RPL19	RPL18A	0.133195	0.175561	0.852001	0	BRCA_chr17	4	4	4	128	1	Non-promiscuous	Non-aggregation prone
RPL19_RPL21	RPL19	RPL21	0.0942567	0.338863	0.547491	1.50504e-09	BRCA_chr17	4	4	4	128	1	Non-promiscuous	Non-aggregation prone
RPL19_RPL22	RPL19	RPL22	0.0336305	0.733419	-0.60876	5.60241e-12	BRCA_chr17	3	4	4	128	0.75	Non-promiscuous	Non-aggregation prone
RPL19_RPL24	RPL19	RPL24	0.192194	0.0495096	0.55253	9.90996e-10	BRCA_chr17	3	4	4	128	0.75	Non-promiscuous	Non-aggregation prone
RPL19_RPL27A	RPL19	RPL27A	0.111424	0.257794	0.590908	3.22882e-11	BRCA_chr17	3	4	4	128	0.75	Non-promiscuous	Non-aggregation prone
RPL19_RPL28	RPL19	RPL28	0.19462	0.0466515	0.917582	0	BRCA_chr17	4	4	4	128	1	Non-promiscuous	Non-aggregation prone
RPL19_RPL29	RPL19	RPL29	0.309185	0.0013306	0.879733	0	BRCA_chr17	3	4	4	128	0.75	Non-promiscuous	Non-aggregation prone
RPL19_RPL3	RPL19	RPL3	0.294588	0.00228466	0.767385	0	BRCA_chr17	3	4	4	128	0.75	Non-promiscuous	Non-aggregation prone
RPL19_RPL30	RPL19	RPL30	0.211414	0.0303914	0.436005	3.33467e-06	BRCA_chr17	4	6	4	128	0.666667	Non-promiscuous	Non-aggregation prone
RPL19_RPL31	RPL19	RPL31	0.202747	0.0380545	0.769366	0	BRCA_chr17	3	4	4	128	0.75	Non-promiscuous	Non-aggregation prone
RPL19_RPL32	RPL19	RPL32	0.195656	0.0454725	0.777369	0	BRCA_chr17	4	4	4	128	1	Non-promiscuous	Non-aggregation prone
RPL19_RPL34	RPL19	RPL34	0.180116	0.0659718	0.925627	0	BRCA_chr17	3	4	4	128	0.75	Non-promiscuous	Non-aggregation prone
RPL19_RPL35	RPL19	RPL35	0.312192	0.00118631	0.867914	0	BRCA_chr17	3	4	4	128	0.75	Non-promiscuous	Non-aggregation prone
RPL19_RPL35A	RPL19	RPL35A	0.156759	0.110273	0.808314	0	BRCA_chr17	4	4	4	128	1	Non-promiscuous	Non-aggregation prone
RPL19_RPL36	RPL19	RPL36	0.235393	0.015638	0.426519	5.70947e-06	BRCA_chr17	4	4	4	128	1	Non-promiscuous	Non-aggregation prone
RPL19_RPL36A	RPL19	RPL36A	0.192785	0.0488004	0.900156	0	BRCA_chr17	3	4	4	128	0.75	Non-promiscuous	Non-aggregation prone
RPL19_RPL37	RPL19	RPL37	0.254344	0.00883803	0.750826	0	BRCA_chr17	2	4	4	128	0.5	Non-promiscuous	Non-aggregation prone
RPL19_RPL37A	RPL19	RPL37A	0.186056	0.0573915	0.7435	0	BRCA_chr17	4	4	4	128	1	Non-promiscuous	Non-aggregation prone
RPL19_RPL39	RPL19	RPL39	0.130033	0.18613	0.199876	0.0409263	BRCA_chr17	3	4	4	128	0.75	Non-promiscuous	Non-aggregation prone
RPL19_RPL4	RPL19	RPL4	0.105546	0.28391	0.271055	0.00516111	BRCA_chr17	3	5	4	128	0.6	Non-promiscuous	Non-aggregation prone
RPL19_RPL41	RPL19	RPL41	0.25762	0.00797425	-0.310762	0.0355498	BRCA_chr17	2	4	4	128	0.5	Non-promiscuous	Non-aggregation prone
RPL19_RPL5	RPL19	RPL5	0.0253162	0.797681	0.53984	2.80187e-09	BRCA_chr17	3	4	4	128	0.75	Non-promiscuous	Non-aggregation prone
RPL19_RPL6	RPL19	RPL6	0.379577	6.51125e-05	0.744661	0	BRCA_chr17	3	6	4	128	0.5	Non-promiscuous	Non-aggregation prone
RPL19_RPL7	RPL19	RPL7	0.162928	0.0967852	0.452219	1.27998e-06	BRCA_chr17	4	4	4	128	1	Non-promiscuous	Non-aggregation prone
RPL19_RPL7A	RPL19	RPL7A	0.361642	0.000150345	0.63474	3.57048e-13	BRCA_chr17	4	5	4	128	0.8	Non-promiscuous	Non-aggregation prone
RPL19_RPL8	RPL19	RPL8	0.217313	0.0259592	0.580282	8.71312e-11	BRCA_chr17	3	5	4	128	0.6	Non-promiscuous	Non-aggregation prone
RPL19_RPL9	RPL19	RPL9	0.261767	0.00698822	-0.587829	4.3209e-11	BRCA_chr17	3	4	4	128	0.75	Non-promiscuous	Non-aggregation prone
RPL19_RPLP0	RPL19	RPLP0	0.175016	0.074145	-0.709807	0	BRCA_chr17	3	4	4	128	0.75	Non-promiscuous	Non-aggregation prone
RPL19_RPLP1	RPL19	RPLP1	0.125793	0.20102	-0.514908	1.91327e-08	BRCA_chr17	4	4	4	128	1	Non-promiscuous	Non-aggregation prone
RPL19_RPLP2	RPL19	RPLP2	-0.00867717	0.929994	-0.260916	0.00718108	BRCA_chr17	4	4	4	128	1	Non-promiscuous	Non-aggregation prone
RPL19_RPS10	RPL19	RPS10	0.154717	0.115048	0.569625	2.27653e-10	BRCA_chr17	1	6	4	128	0.166667	Non-promiscuous	Non-aggregation prone
RPL19_RPS11	RPL19	RPS11	0.189229	0.0531979	0.781018	0	BRCA_chr17	2	7	4	128	0.285714	Non-promiscuous	Non-aggregation prone
RPL19_RPS12	RPL19	RPS12	0.0502384	0.610787	-0.341115	0.000369473	BRCA_chr17	2	6	4	128	0.333333	Non-promiscuous	Non-aggregation prone
RPL19_RPS13	RPL19	RPS13	0.118142	0.230017	0.0686087	0.486783	BRCA_chr17	2	8	4	128	0.25	Non-promiscuous	Non-aggregation prone
RPL19_RPS14	RPL19	RPS14	0.351576	0.000235453	-0.0340556	0.730178	BRCA_chr17	2	6	4	128	0.333333	Non-promiscuous	Non-aggregation prone
RPL19_RPS15	RPL19	RPS15	0.279888	0.00383167	-0.32882	0.000615195	BRCA_chr17	2	6	4	128	0.333333	Non-promiscuous	Non-aggregation prone
RPL19_RPS15A	RPL19	RPS15A	0.223025	0.0222043	0.693324	2.22045e-16	BRCA_chr17	2	6	4	128	0.333333	Non-promiscuous	Non-aggregation prone
RPL19_RPS16	RPL19	RPS16	0.117728	0.231668	0.72967	0	BRCA_chr17	2	6	4	128	0.333333	Non-promiscuous	Non-aggregation prone
RPL19_RPS17	RPL19	RPS17	0.020734	0.833715	-0.027006	0.784495	BRCA_chr17	2	6	4	128	0.333333	Non-promiscuous	Non-aggregation prone
RPL19_RPS18	RPL19	RPS18	0.246081	0.011392	0.797512	0	BRCA_chr17	2	6	4	128	0.333333	Non-promiscuous	Non-aggregation prone
RPL19_RPS19	RPL19	RPS19	0.0860253	0.382901	0.796226	0	BRCA_chr17	1	6	4	128	0.166667	Non-promiscuous	Non-aggregation prone
RPL19_RPS2	RPL19	RPS2	0.309392	0.00132016	0.156956	0.109821	BRCA_chr17	2	6	4	128	0.333333	Non-promiscuous	Non-aggregation prone
RPL19_RPS20	RPL19	RPS20	0.12231	0.213878	0.669801	5.55112e-15	BRCA_chr17	1	6	4	128	0.166667	Non-promiscuous	Non-aggregation prone
RPL19_RPS21	RPL19	RPS21	0.162088	0.098541	0.622662	1.32516e-12	BRCA_chr17	1	6	4	128	0.166667	Non-promiscuous	Non-aggregation prone
RPL19_RPS23	RPL19	RPS23	0.257858	0.0079144	0.5712	1.97942e-10	BRCA_chr17	2	6	4	128	0.333333	Non-promiscuous	Non-aggregation prone
RPL19_RPS24	RPL19	RPS24	0.250674	0.00990253	-0.321626	0.000821086	BRCA_chr17	2	6	4	128	0.333333	Non-promiscuous	Non-aggregation prone
RPL19_RPS25	RPL19	RPS25	0.103411	0.29382	0.441852	2.3744e-06	BRCA_chr17	1	6	4	128	0.166667	Non-promiscuous	Non-aggregation prone
RPL19_RPS26	RPL19	RPS26	0.255391	0.0085534	0.797792	0	BRCA_chr17	1	6	4	128	0.166667	Non-promiscuous	Non-aggregation prone
RPL19_RPS27	RPL19	RPS27	0.121563	0.216708	0.115727	0.239753	BRCA_chr17	1	5	4	128	0.2	Non-promiscuous	Non-aggregation prone
RPL19_RPS27A	RPL19	RPS27A	0.0374767	0.704273	0.00552561	0.955387	BRCA_chr17	1	6	4	128	0.166667	Non-promiscuous	Non-aggregation prone
RPL19_RPS28	RPL19	RPS28	0.140307	0.153413	-0.262326	0.00686374	BRCA_chr17	1	6	4	128	0.166667	Non-promiscuous	Non-aggregation prone
RPL19_RPS29	RPL19	RPS29	0.119055	0.226413	0.680634	1.33227e-15	BRCA_chr17	2	6	4	128	0.333333	Non-promiscuous	Non-aggregation prone
RPL19_RPS3	RPL19	RPS3	0.152747	0.119803	-0.0730769	0.458788	BRCA_chr17	1	6	4	128	0.166667	Non-promiscuous	Non-aggregation prone
RPL19_RPS3A	RPL19	RPS3A	0.253711	0.00901394	0.691064	4.44089e-16	BRCA_chr17	2	6	4	128	0.333333	Non-promiscuous	Non-aggregation prone
RPL19_RPS4X	RPL19	RPS4X	0.165592	0.0913773	0.6726	3.9968e-15	BRCA_chr17	1	6	4	128	0.166667	Non-promiscuous	Non-aggregation prone
RPL19_RPS4Y1	RPL19	RPS4Y1	0.0199925	0.83958	0.728882	0	BRCA_chr17	1	5	4	128	0.2	Non-promiscuous	Non-aggregation prone
RPL19_RPS5	RPL19	RPS5	0.202581	0.0382157	0.679411	1.77636e-15	BRCA_chr17	1	6	4	128	0.166667	Non-promiscuous	Non-aggregation prone
RPL19_RPS6	RPL19	RPS6	0.149917	0.126899	0.769594	0	BRCA_chr17	2	7	4	128	0.285714	Non-promiscuous	Non-aggregation prone
RPL19_RPS7	RPL19	RPS7	0.0973564	0.323146	0.12711	0.196307	BRCA_chr17	2	6	4	128	0.333333	Non-promiscuous	Non-aggregation prone
RPL19_RPS8	RPL19	RPS8	0.126923	0.19697	0.730323	0	BRCA_chr17	2	6	4	128	0.333333	Non-promiscuous	Non-aggregation prone
RPL19_RPS9	RPL19	RPS9	0.173792	0.0762218	0.478136	2.49122e-07	BRCA_chr17	2	6	4	128	0.333333	Non-promiscuous	Non-aggregation prone
RPL19_RPSA	RPL19	RPSA	0.138659	0.15835	-0.70537	0	BRCA_chr17	1	6	4	128	0.166667	Non-promiscuous	Non-aggregation prone
RPL19_RSL1D1	RPL19	RSL1D1	0.159672	0.103731	0.459662	8.10986e-07	BRCA_chr17	1	4	4	128	0.25	Non-promiscuous	Non-aggregation prone
RPL19_RSL24D1	RPL19	RSL24D1	0.0869272	0.377914	-0.407568	1.59429e-05	BRCA_chr17	1	4	4	128	0.25	Non-promiscuous	Non-aggregation prone
RPL19_SCYL2	RPL19	SCYL2	-0.0675617	0.493472	-0.215499	0.0272596	BRCA_chr17	1	4	4	128	0.25	Non-promiscuous	Non-aggregation prone
RPL19_SLC25A5	RPL19	SLC25A5	-0.0632697	0.52139	0.078022	0.428872	BRCA_chr17	1	7	4	128	0.142857	Non-promiscuous	Non-aggregation prone
RPL19_SNU13	RPL19	SNU13	0.215354	0.027366	-0.0781256	0.428257	BRCA_chr17	1	5	4	128	0.2	Non-promiscuous	Non-aggregation prone
RPL19_SRP14	RPL19	SRP14	0.126996	0.196712	0.671667	4.44089e-15	BRCA_chr17	1	4	4	128	0.25	Non-promiscuous	Non-aggregation prone
RPL19_SRPK1	RPL19	SRPK1	-0.0885652	0.368958	0.449108	1.54397e-06	BRCA_chr17	1	6	4	128	0.166667	Non-promiscuous	Non-aggregation prone
RPL19_TCOF1	RPL19	TCOF1	-0.0133112	0.892792	0.74747	0	BRCA_chr17	1	4	4	128	0.25	Non-promiscuous	Non-aggregation prone
RPL19_TOP1	RPL19	TOP1	0.00828323	0.933165	0.529712	6.23072e-09	BRCA_chr17	1	11	4	128	0.0909091	Non-promiscuous	Non-aggregation prone
RPL19_TUBB1	RPL19	TUBB1	0.0430645	0.662692	-0.079888	0.41788	BRCA_chr17	1	5	4	128	0.2	Non-promiscuous	Non-aggregation prone
RPL19_TUFM	RPL19	TUFM	0.150715	0.124866	-0.00972424	0.921572	BRCA_chr17	1	4	4	128	0.25	Non-promiscuous	Non-aggregation prone
RPL19_U2AF1	RPL19	U2AF1	-0.0544578	0.581115	0.0214389	0.828147	BRCA_chr17	1	8	4	128	0.125	Non-promiscuous	Non-aggregation prone
RPL19_U2AF2	RPL19	U2AF2	0.113892	0.247337	-0.604022	9.01279e-12	BRCA_chr17	1	7	4	128	0.142857	Non-promiscuous	Non-aggregation prone
RPL19_UBA52	RPL19	UBA52	0.0716152	0.467848	0.182086	0.0630182	BRCA_chr17	2	4	4	128	0.5	Non-promiscuous	Non-aggregation prone
RPL19_YBX1	RPL19	YBX1	-0.23984	0.0137283	0.611497	4.2415e-12	BRCA_chr17	1	9	4	128	0.111111	Non-promiscuous	Non-aggregation prone
RPL19_SNU13	RPL19	SNU13	0.215354	0.027366	-0.0781256	0.428257	BRCA_chr17	1	5	4	128	0.2	Non-promiscuous	Non-aggregation prone
RPL19_SRP14	RPL19	SRP14	0.126996	0.196712	0.671667	4.44089e-15	BRCA_chr17	1	4	4	128	0.25	Non-promiscuous	Non-aggregation prone
RPL26_LYAR	RPL26	LYAR	0.0446714	0.650915	0.644785	1.14575e-13	BRCA_chr17	1	4	4	127	0.25	Non-promiscuous	Non-aggregation prone
RPL26_SRP14	RPL26	SRP14	0.172486	0.0784907	0.691945	4.44089e-16	BRCA_chr17	1	4	4	127	0.25	Non-promiscuous	Non-aggregation prone
RPL26_ACTA2	RPL26	ACTA2	0.0751296	0.446232	-0.0614555	0.533427	BRCA_chr17	1	5	4	127	0.2	Non-promiscuous	Non-aggregation prone
RPL26_ACTG2	RPL26	ACTG2	0.0954385	0.332815	-0.0928571	0.346116	BRCA_chr17	1	4	4	127	0.25	Non-promiscuous	Non-aggregation prone
RPL26_BRIX1	RPL26	BRIX1	-0.0482894	0.624713	0.296486	0.00213294	BRCA_chr17	1	4	4	127	0.25	Non-promiscuous	Non-aggregation prone
RPL26_DDX21	RPL26	DDX21	0.0922973	0.349044	0.291966	0.00251045	BRCA_chr17	1	7	4	127	0.142857	Non-promiscuous	Non-aggregation prone
RPL26_DHX9	RPL26	DHX9	-0.110139	0.26336	-0.469096	4.47718e-07	BRCA_chr17	2	11	4	127	0.181818	Non-promiscuous	Non-aggregation prone
RPL26_EBNA1BP2	RPL26	EBNA1BP2	-0.0768609	0.435794	0.538876	3.0268e-09	BRCA_chr17	1	4	4	127	0.25	Non-promiscuous	Non-aggregation prone
RPL26_EEF1A1	RPL26	EEF1A1	0.610792	4.55791e-12	-0.727576	0	BRCA_chr17	1	5	4	127	0.2	Non-promiscuous	Non-aggregation prone
RPL26_EEF2	RPL26	EEF2	0.502882	4.57954e-08	0.0141613	0.88599	BRCA_chr17	1	4	4	127	0.25	Non-promiscuous	Non-aggregation prone
RPL26_ELAVL1	RPL26	ELAVL1	0.105204	0.285482	-0.03305	0.737852	BRCA_chr17	1	4	4	127	0.25	Non-promiscuous	Non-aggregation prone
RPL26_FAU	RPL26	FAU	0.387446	4.44028e-05	-0.0691478	0.483358	BRCA_chr17	1	6	4	127	0.166667	Non-promiscuous	Non-aggregation prone
RPL26_FBL	RPL26	FBL	0.419801	8.2752e-06	0.0642442	0.514982	BRCA_chr17	1	7	4	127	0.142857	Non-promiscuous	Non-aggregation prone
RPL26_GNL3	RPL26	GNL3	0.143199	0.14503	-0.0430541	0.662768	BRCA_chr17	1	4	4	127	0.25	Non-promiscuous	Non-aggregation prone
RPL26_H1FX	RPL26	H1FX	0.172579	0.0783269	0.823637	0	BRCA_chr17	1	4	4	127	0.25	Non-promiscuous	Non-aggregation prone
RPL26_HIST1H1D	RPL26	HIST1H1D	-0.271873	0.00502273	0.715229	0	BRCA_chr17	1	5	4	127	0.2	Non-promiscuous	Non-aggregation prone
RPL26_HNRNPA1	RPL26	HNRNPA1	0.544443	1.93144e-09	0.52402	9.65213e-09	BRCA_chr17	1	5	4	127	0.2	Non-promiscuous	Non-aggregation prone
RPL26_HNRNPM	RPL26	HNRNPM	0.0424839	0.666967	0.489374	1.17367e-07	BRCA_chr17	1	6	4	127	0.166667	Non-promiscuous	Non-aggregation prone
RPL26_HNRNPU	RPL26	HNRNPU	0.156117	0.111759	-0.187529	0.0554129	BRCA_chr17	2	12	4	127	0.166667	Non-promiscuous	Non-aggregation prone
RPL26_ILF2	RPL26	ILF2	-0.11949	0.224707	-0.652602	4.59632e-14	BRCA_chr17	1	7	4	127	0.142857	Non-promiscuous	Non-aggregation prone
RPL26_ILF3	RPL26	ILF3	0.058221	0.555226	0.402975	2.02601e-05	BRCA_chr17	1	10	4	127	0.1	Non-promiscuous	Non-aggregation prone
RPL26_LUC7L2	RPL26	LUC7L2	0.186419	0.0568985	0.769158	0	BRCA_chr17	1	4	4	127	0.25	Non-promiscuous	Non-aggregation prone
RPL26_LYAR	RPL26	LYAR	0.0446714	0.650915	0.644785	1.14575e-13	BRCA_chr17	1	4	4	127	0.25	Non-promiscuous	Non-aggregation prone
RPL26_NAP1L1	RPL26	NAP1L1	0.524829	9.07465e-09	-0.692826	2.22045e-16	BRCA_chr17	1	4	4	127	0.25	Non-promiscuous	Non-aggregation prone
RPL26_NCL	RPL26	NCL	0.00287166	0.976806	0.692453	4.44089e-16	BRCA_chr17	1	11	4	127	0.0909091	Non-promiscuous	Non-aggregation prone
RPL26_NOLC1	RPL26	NOLC1	0.191852	0.0499241	0.834926	0	BRCA_chr17	1	4	4	127	0.25	Non-promiscuous	Non-aggregation prone
RPL26_NOP56	RPL26	NOP56	-0.0441738	0.654553	0.589405	3.72378e-11	BRCA_chr17	1	4	4	127	0.25	Non-promiscuous	Non-aggregation prone
RPL26_NOP58	RPL26	NOP58	-0.0255028	0.796222	0.43022	4.63781e-06	BRCA_chr17	1	4	4	127	0.25	Non-promiscuous	Non-aggregation prone
RPL26_NPM1	RPL26	NPM1	0.391717	3.59235e-05	-0.407744	1.57958e-05	BRCA_chr17	1	12	4	127	0.0833333	Non-promiscuous	Non-aggregation prone
RPL26_PWP1	RPL26	PWP1	-0.00699772	0.943519	-0.356801	0.000186892	BRCA_chr17	1	4	4	127	0.25	Non-promiscuous	Non-aggregation prone
RPL26_RBM28	RPL26	RBM28	-0.122548	0.21298	0.745366	0	BRCA_chr17	1	4	4	127	0.25	Non-promiscuous	Non-aggregation prone
RPL26_RPL10	RPL26	RPL10	0.423854	6.62117e-06	0.705505	0	BRCA_chr17	3	4	4	127	0.75	Non-promiscuous	Non-aggregation prone
RPL26_RPL10A	RPL26	RPL10A	0.625679	9.60121e-13	0.414752	1.08809e-05	BRCA_chr17	3	5	4	127	0.6	Non-promiscuous	Non-aggregation prone
RPL26_RPL11	RPL26	RPL11	0.648227	7.68274e-14	-0.436305	3.27745e-06	BRCA_chr17	3	5	4	127	0.6	Non-promiscuous	Non-aggregation prone
RPL26_RPL12	RPL26	RPL12	0.663353	1.24345e-14	0.450467	1.42291e-06	BRCA_chr17	3	5	4	127	0.6	Non-promiscuous	Non-aggregation prone
RPL26_RPL13	RPL26	RPL13	0.490473	1.08881e-07	0.889343	0	BRCA_chr17	3	5	4	127	0.6	Non-promiscuous	Non-aggregation prone
RPL26_RPL13A	RPL26	RPL13A	0.616608	2.50444e-12	0.786316	0	BRCA_chr17	3	5	4	127	0.6	Non-promiscuous	Non-aggregation prone
RPL26_RPL14	RPL26	RPL14	0.678768	1.77636e-15	0.713871	0	BRCA_chr17	3	5	4	127	0.6	Non-promiscuous	Non-aggregation prone
RPL26_RPL15	RPL26	RPL15	0.644029	1.25011e-13	0.824673	0	BRCA_chr17	3	5	4	127	0.6	Non-promiscuous	Non-aggregation prone
RPL26_RPL17	RPL26	RPL17	0.391261	3.67509e-05	0.822123	0	BRCA_chr17	3	4	4	127	0.75	Non-promiscuous	Non-aggregation prone
RPL26_RPL18	RPL26	RPL18	0.60453	8.56804e-12	0.909164	0	BRCA_chr17	3	4	4	127	0.75	Non-promiscuous	Non-aggregation prone
RPL26_RPL18A	RPL26	RPL18A	0.350083	0.000251332	0.908708	0	BRCA_chr17	3	5	4	127	0.6	Non-promiscuous	Non-aggregation prone
RPL26_RPL21	RPL26	RPL21	0.610979	4.47198e-12	0.557464	6.53705e-10	BRCA_chr17	3	5	4	127	0.6	Non-promiscuous	Non-aggregation prone
RPL26_RPL22	RPL26	RPL22	0.50933	2.88002e-08	-0.694091	2.22045e-16	BRCA_chr17	3	4	4	127	0.75	Non-promiscuous	Non-aggregation prone
RPL26_RPL24	RPL26	RPL24	0.53504	4.10546e-09	0.57826	1.04821e-10	BRCA_chr17	3	4	4	127	0.75	Non-promiscuous	Non-aggregation prone
RPL26_RPL27A	RPL26	RPL27A	0.511466	2.46469e-08	0.568484	2.51783e-10	BRCA_chr17	3	4	4	127	0.75	Non-promiscuous	Non-aggregation prone
RPL26_RPL28	RPL26	RPL28	0.543469	2.09069e-09	0.923243	0	BRCA_chr17	3	5	4	127	0.6	Non-promiscuous	Non-aggregation prone
RPL26_RPL29	RPL26	RPL29	0.700871	0	0.873409	0	BRCA_chr17	3	4	4	127	0.75	Non-promiscuous	Non-aggregation prone
RPL26_RPL3	RPL26	RPL3	0.633174	4.24549e-13	0.826218	0	BRCA_chr17	3	4	4	127	0.75	Non-promiscuous	Non-aggregation prone
RPL26_RPL30	RPL26	RPL30	0.370672	9.92599e-05	0.524	9.66739e-09	BRCA_chr17	3	7	4	127	0.428571	Non-promiscuous	Non-aggregation prone
RPL26_RPL31	RPL26	RPL31	0.69831	0	0.820506	0	BRCA_chr17	3	4	4	127	0.75	Non-promiscuous	Non-aggregation prone
RPL26_RPL32	RPL26	RPL32	0.63108	5.34239e-13	0.821252	0	BRCA_chr17	3	5	4	127	0.6	Non-promiscuous	Non-aggregation prone
RPL26_RPL34	RPL26	RPL34	0.692453	4.44089e-16	0.911445	0	BRCA_chr17	2	5	4	127	0.4	Non-promiscuous	Non-aggregation prone
RPL26_RPL35	RPL26	RPL35	0.518122	1.50652e-08	0.879784	0	BRCA_chr17	3	4	4	127	0.75	Non-promiscuous	Non-aggregation prone
RPL26_RPL35A	RPL26	RPL35A	0.598165	1.60503e-11	0.90312	0	BRCA_chr17	3	5	4	127	0.6	Non-promiscuous	Non-aggregation prone
RPL26_RPL36	RPL26	RPL36	0.621304	1.53033e-12	0.3887	4.17362e-05	BRCA_chr17	3	5	4	127	0.6	Non-promiscuous	Non-aggregation prone
RPL26_RPL36A	RPL26	RPL36A	0.651597	5.19584e-14	0.931391	0	BRCA_chr17	3	4	4	127	0.75	Non-promiscuous	Non-aggregation prone
RPL26_RPL37	RPL26	RPL37	0.584823	5.72598e-11	0.804045	0	BRCA_chr17	2	4	4	127	0.5	Non-promiscuous	Non-aggregation prone
RPL26_RPL37A	RPL26	RPL37A	0.577721	1.10093e-10	0.725928	0	BRCA_chr17	3	5	4	127	0.6	Non-promiscuous	Non-aggregation prone
RPL26_RPL39	RPL26	RPL39	0.517344	1.59656e-08	0.126882	0.197118	BRCA_chr17	3	4	4	127	0.75	Non-promiscuous	Non-aggregation prone
RPL26_RPL4	RPL26	RPL4	0.516338	1.72068e-08	0.224487	0.0213218	BRCA_chr17	3	5	4	127	0.6	Non-promiscuous	Non-aggregation prone
RPL26_RPL41	RPL26	RPL41	0.46666	5.22847e-07	-0.387111	0.00786613	BRCA_chr17	2	4	4	127	0.5	Non-promiscuous	Non-aggregation prone
RPL26_RPL5	RPL26	RPL5	0.649865	6.35048e-14	0.584076	6.1378e-11	BRCA_chr17	3	4	4	127	0.75	Non-promiscuous	Non-aggregation prone
RPL26_RPL6	RPL26	RPL6	0.59717	1.76832e-11	0.697014	0	BRCA_chr17	3	6	4	127	0.5	Non-promiscuous	Non-aggregation prone
RPL26_RPL7	RPL26	RPL7	0.501835	4.93331e-08	0.406096	1.72224e-05	BRCA_chr17	3	5	4	127	0.6	Non-promiscuous	Non-aggregation prone
RPL26_RPL7A	RPL26	RPL7A	0.622341	1.37113e-12	0.690245	4.44089e-16	BRCA_chr17	3	6	4	127	0.5	Non-promiscuous	Non-aggregation prone
RPL26_RPL8	RPL26	RPL8	0.320724	0.000850924	0.599057	1.47118e-11	BRCA_chr17	3	5	4	127	0.6	Non-promiscuous	Non-aggregation prone
RPL26_RPL9	RPL26	RPL9	0.575181	1.38568e-10	-0.544516	1.92006e-09	BRCA_chr17	3	4	4	127	0.75	Non-promiscuous	Non-aggregation prone
RPL26_RPLP0	RPL26	RPLP0	0.460512	7.69271e-07	-0.677566	2.22045e-15	BRCA_chr17	3	4	4	127	0.75	Non-promiscuous	Non-aggregation prone
RPL26_RPLP1	RPL26	RPLP1	0.474466	3.16701e-07	-0.536461	3.66892e-09	BRCA_chr17	3	5	4	127	0.6	Non-promiscuous	Non-aggregation prone
RPL26_RPLP2	RPL26	RPLP2	0.487176	1.36268e-07	-0.135434	0.168348	BRCA_chr17	3	5	4	127	0.6	Non-promiscuous	Non-aggregation prone
RPL26_RPS10	RPL26	RPS10	0.545553	1.76433e-09	0.618225	2.11564e-12	BRCA_chr17	1	6	4	127	0.166667	Non-promiscuous	Non-aggregation prone
RPL26_RPS11	RPL26	RPS11	0.578105	1.06316e-10	0.82797	0	BRCA_chr17	2	7	4	127	0.285714	Non-promiscuous	Non-aggregation prone
RPL26_RPS12	RPL26	RPS12	0.435123	3.50789e-06	-0.325461	0.000704573	BRCA_chr17	2	6	4	127	0.333333	Non-promiscuous	Non-aggregation prone
RPL26_RPS13	RPL26	RPS13	0.568982	2.40965e-10	0.121283	0.217776	BRCA_chr17	2	8	4	127	0.25	Non-promiscuous	Non-aggregation prone
RPL26_RPS14	RPL26	RPS14	0.677068	2.22045e-15	-0.0368547	0.708959	BRCA_chr17	2	6	4	127	0.333333	Non-promiscuous	Non-aggregation prone
RPL26_RPS15	RPL26	RPS15	0.533765	4.53945e-09	-0.307018	0.00144429	BRCA_chr17	2	6	4	127	0.333333	Non-promiscuous	Non-aggregation prone
RPL26_RPS15A	RPL26	RPS15A	0.693956	2.22045e-16	0.795169	0	BRCA_chr17	2	6	4	127	0.333333	Non-promiscuous	Non-aggregation prone
RPL26_RPS16	RPL26	RPS16	0.541064	2.53949e-09	0.788773	0	BRCA_chr17	2	6	4	127	0.333333	Non-promiscuous	Non-aggregation prone
RPL26_RPS17	RPL26	RPS17	0.50764	3.25525e-08	0.0147937	0.880935	BRCA_chr17	2	6	4	127	0.333333	Non-promiscuous	Non-aggregation prone
RPL26_RPS18	RPL26	RPS18	0.630033	5.99076e-13	0.865872	0	BRCA_chr17	2	6	4	127	0.333333	Non-promiscuous	Non-aggregation prone
RPL26_RPS19	RPL26	RPS19	0.40198	2.13301e-05	0.830997	0	BRCA_chr17	1	6	4	127	0.166667	Non-promiscuous	Non-aggregation prone
RPL26_RPS2	RPL26	RPS2	0.521574	1.16216e-08	0.236564	0.0151139	BRCA_chr17	2	6	4	127	0.333333	Non-promiscuous	Non-aggregation prone
RPL26_RPS20	RPL26	RPS20	0.420402	8.00741e-06	0.708283	0	BRCA_chr17	1	6	4	127	0.166667	Non-promiscuous	Non-aggregation prone
RPL26_RPS21	RPL26	RPS21	0.267603	0.00578342	0.610657	4.62097e-12	BRCA_chr17	1	6	4	127	0.166667	Non-promiscuous	Non-aggregation prone
RPL26_RPS23	RPL26	RPS23	0.592598	2.74809e-11	0.660554	1.77636e-14	BRCA_chr17	2	6	4	127	0.333333	Non-promiscuous	Non-aggregation prone
RPL26_RPS24	RPL26	RPS24	0.672631	3.9968e-15	-0.363933	0.000135469	BRCA_chr17	2	6	4	127	0.333333	Non-promiscuous	Non-aggregation prone
RPL26_RPS25	RPL26	RPS25	0.516121	1.74874e-08	0.559061	5.70543e-10	BRCA_chr17	1	6	4	127	0.166667	Non-promiscuous	Non-aggregation prone
RPL26_RPS26	RPL26	RPS26	0.206728	0.0343542	0.897253	0	BRCA_chr17	1	6	4	127	0.166667	Non-promiscuous	Non-aggregation prone
RPL26_RPS27	RPL26	RPS27	0.586409	4.93736e-11	0.211621	0.0302254	BRCA_chr17	1	5	4	127	0.2	Non-promiscuous	Non-aggregation prone
RPL26_RPS27A	RPL26	RPS27A	0.459538	8.17267e-07	0.0468692	0.634945	BRCA_chr17	1	6	4	127	0.166667	Non-promiscuous	Non-aggregation prone
RPL26_RPS28	RPL26	RPS28	0.436357	3.26767e-06	-0.336958	0.000440023	BRCA_chr17	1	6	4	127	0.166667	Non-promiscuous	Non-aggregation prone
RPL26_RPS29	RPL26	RPS29	0.442484	2.28789e-06	0.744391	0	BRCA_chr17	2	6	4	127	0.333333	Non-promiscuous	Non-aggregation prone
RPL26_RPS3	RPL26	RPS3	0.53956	2.86546e-09	-0.030904	0.754314	BRCA_chr17	1	6	4	127	0.166667	Non-promiscuous	Non-aggregation prone
RPL26_RPS3A	RPL26	RPS3A	0.690348	4.44089e-16	0.815696	0	BRCA_chr17	2	6	4	127	0.333333	Non-promiscuous	Non-aggregation prone
RPL26_RPS4X	RPL26	RPS4X	0.695335	2.22045e-16	0.782013	0	BRCA_chr17	1	6	4	127	0.166667	Non-promiscuous	Non-aggregation prone
RPL26_RPS4Y1	RPL26	RPS4Y1	-0.0653458	0.507786	0.83502	0	BRCA_chr17	1	5	4	127	0.2	Non-promiscuous	Non-aggregation prone
RPL26_RPS5	RPL26	RPS5	0.463166	6.51751e-07	0.745853	0	BRCA_chr17	1	6	4	127	0.166667	Non-promiscuous	Non-aggregation prone
RPL26_RPS6	RPL26	RPS6	0.665716	9.32587e-15	0.812617	0	BRCA_chr17	3	6	4	127	0.5	Non-promiscuous	Non-aggregation prone
RPL26_RPS7	RPL26	RPS7	0.483817	1.70856e-07	0.159859	0.103323	BRCA_chr17	2	6	4	127	0.333333	Non-promiscuous	Non-aggregation prone
RPL26_RPS8	RPL26	RPS8	0.586595	4.85179e-11	0.757132	0	BRCA_chr17	2	6	4	127	0.333333	Non-promiscuous	Non-aggregation prone
RPL26_RPS9	RPL26	RPS9	0.603297	9.68692e-12	0.492888	9.22358e-08	BRCA_chr17	2	6	4	127	0.333333	Non-promiscuous	Non-aggregation prone
RPL26_RPSA	RPL26	RPSA	0.510605	2.62463e-08	-0.751545	0	BRCA_chr17	1	6	4	127	0.166667	Non-promiscuous	Non-aggregation prone
RPL26_RSL1D1	RPL26	RSL1D1	0.32769	0.000644032	0.584159	6.09068e-11	BRCA_chr17	1	4	4	127	0.25	Non-promiscuous	Non-aggregation prone
RPL26_SCYL2	RPL26	SCYL2	-0.235217	0.0157182	-0.21016	0.0314123	BRCA_chr17	1	4	4	127	0.25	Non-promiscuous	Non-aggregation prone
RPL26_SLC25A5	RPL26	SLC25A5	-0.160782	0.101322	0.0623678	0.527357	BRCA_chr17	1	7	4	127	0.142857	Non-promiscuous	Non-aggregation prone
RPL26_SNU13	RPL26	SNU13	0.00925772	0.925324	-0.0924425	0.348283	BRCA_chr17	1	5	4	127	0.2	Non-promiscuous	Non-aggregation prone
RPL26_SRP14	RPL26	SRP14	0.172486	0.0784907	0.691945	4.44089e-16	BRCA_chr17	1	4	4	127	0.25	Non-promiscuous	Non-aggregation prone
RPL26_SRPK1	RPL26	SRPK1	-0.0536699	0.586605	0.554634	8.30564e-10	BRCA_chr17	1	6	4	127	0.166667	Non-promiscuous	Non-aggregation prone
RPL26_STAU1	RPL26	STAU1	-0.192401	0.0492598	-0.278146	0.00406651	BRCA_chr17	1	4	4	127	0.25	Non-promiscuous	Non-aggregation prone
RPL26_SYNCRIP	RPL26	SYNCRIP	0.0469314	0.634496	-0.350093	0.000251218	BRCA_chr17	1	7	4	127	0.142857	Non-promiscuous	Non-aggregation prone
RPL26_TCOF1	RPL26	TCOF1	0.0148248	0.880687	0.813902	0	BRCA_chr17	1	4	4	127	0.25	Non-promiscuous	Non-aggregation prone
RPL26_TOP1	RPL26	TOP1	-0.234242	0.0161681	0.671418	4.44089e-15	BRCA_chr17	1	11	4	127	0.0909091	Non-promiscuous	Non-aggregation prone
RPL26_TUBB1	RPL26	TUBB1	-0.121905	0.215408	-0.0294941	0.765191	BRCA_chr17	1	5	4	127	0.2	Non-promiscuous	Non-aggregation prone
RPL26_TUFM	RPL26	TUFM	-0.0431785	0.661853	-0.0587186	0.551845	BRCA_chr17	1	4	4	127	0.25	Non-promiscuous	Non-aggregation prone
RPL26_U2AF1	RPL26	U2AF1	-0.076695	0.436788	0.0643375	0.51437	BRCA_chr17	1	8	4	127	0.125	Non-promiscuous	Non-aggregation prone
RPL26_U2AF2	RPL26	U2AF2	0.130437	0.184753	-0.60311	9.86811e-12	BRCA_chr17	1	7	4	127	0.142857	Non-promiscuous	Non-aggregation prone
RPL26_UBA52	RPL26	UBA52	0.355774	0.000195629	0.256832	0.00817489	BRCA_chr17	2	4	4	127	0.5	Non-promiscuous	Non-aggregation prone
RPL26_YBX1	RPL26	YBX1	-0.015706	0.873652	0.759704	0	BRCA_chr17	2	8	4	127	0.25	Non-promiscuous	Non-aggregation prone
RPL26_SNU13	RPL26	SNU13	0.00925772	0.925324	-0.0924425	0.348283	BRCA_chr17	1	5	4	127	0.2	Non-promiscuous	Non-aggregation prone
EIF4E_EIF4A1	EIF4E	EIF4A1	-0.0851802	0.357012	0.0588805	0.524722	OV_chr4	1	2	1	3	0.5	Non-promiscuous	Non-aggregation prone
EIF4E_EIF4G1	EIF4E	EIF4G1	-0.0488606	0.597711	-0.103076	0.26462	OV_chr4	1	2	1	3	0.5	Non-promiscuous	Non-aggregation prone
NAA15_XRCC5	NAA15	XRCC5	0.223408	0.014593	0.0581185	0.530111	OV_chr4	1	27	2	3	0.037037	Non-promiscuous	Non-aggregation prone
NAA15_XRCC6	NAA15	XRCC6	0.200634	0.0286804	0.0285786	0.757681	OV_chr4	1	29	2	3	0.0344828	Non-promiscuous	Non-aggregation prone
NAA15_XRCC6	NAA15	XRCC6	0.200634	0.0286804	0.0285786	0.757681	OV_chr4	1	29	2	3	0.0344828	Non-promiscuous	Non-aggregation prone
SEC24B_PREB	SEC24B	PREB	0.12271	0.183678	0.0194417	0.833773	OV_chr4	1	4	3	6	0.25	Non-promiscuous	Non-aggregation prone
SEC24B_SAR1B	SEC24B	SAR1B	0.0877653	0.342553	-0.00573992	0.950599	OV_chr4	1	3	3	6	0.333333	Non-promiscuous	Non-aggregation prone
SEC24B_SEC23IP	SEC24B	SEC23IP	0.230466	0.0116826	0.00999145	0.914118	OV_chr4	1	3	3	6	0.333333	Non-promiscuous	Non-aggregation prone
SEC23A_SEC24B	SEC23A	SEC24B	0.381018	6.07482e-05	0.613601	3.41815e-12	BRCA_chr14	3	3	3	6	1	Non-promiscuous	Non-aggregation prone
SEC23A_PREB	SEC23A	PREB	0.0583662	0.554239	0.129484	0.188013	BRCA_chr14	1	4	3	6	0.25	Non-promiscuous	Non-aggregation prone
SEC23A_SAR1B	SEC23A	SAR1B	0.192017	0.0497228	0.320185	0.000869227	BRCA_chr14	1	3	3	6	0.333333	Non-promiscuous	Non-aggregation prone
SEC23A_SCAP	SEC23A	SCAP	0.243427	0.0123393	-0.533401	0.00047131	BRCA_chr14	1	8	3	6	0.125	Non-promiscuous	Non-aggregation prone
SEC23A_SEC23IP	SEC23A	SEC23IP	0.494112	8.47614e-08	0.0628862	0.523924	BRCA_chr14	1	3	3	6	0.333333	Non-promiscuous	Non-aggregation prone
SEC23A_SEC24B	SEC23A	SEC24B	0.381018	6.07482e-05	0.613601	3.41815e-12	BRCA_chr14	3	3	3	6	1	Non-promiscuous	Non-aggregation prone
SEC23A_SREBF1	SEC23A	SREBF1	0.111881	0.255838	-0.323034	0.0118202	BRCA_chr14	1	4	3	6	0.25	Non-promiscuous	Non-aggregation prone
GRPEL1_HSPA9	GRPEL1	HSPA9	0.105526	0.253372	0.452898	2.32005e-07	OV_chr4	3	6	4	3	0.5	Non-promiscuous	Non-aggregation prone
GRPEL1_TIMM44	GRPEL1	TIMM44	-0.0833856	0.36727	0.116016	0.208943	OV_chr4	1	5	4	3	0.2	Non-promiscuous	Non-aggregation prone
KCTD12_GNB1	KCTD12	GNB1	0.0255662	0.782552	0.334098	0.000204496	OV_chr13	1	34	1	2	0.0294118	Non-promiscuous	Non-aggregation prone
KCTD12_GNG2	KCTD12	GNG2	0.255783	0.00499011	0.303453	0.00183356	OV_chr13	1	21	1	2	0.047619	Non-promiscuous	Non-aggregation prone
LMO7_BANF1	LMO7	BANF1	-0.164036	0.0746458	0.0376798	0.684122	OV_chr13	1	6	2	14	0.166667	Non-promiscuous	Non-aggregation prone
LMO7_CNN3	LMO7	CNN3	-0.0662228	0.474259	0.387965	1.30338e-05	OV_chr13	1	2	2	14	0.5	Non-promiscuous	Non-aggregation prone
LMO7_EMD	LMO7	EMD	-0.0178251	0.84742	0.171172	0.0626989	OV_chr13	2	9	2	14	0.222222	Non-promiscuous	Non-aggregation prone
LMO7_HDAC1	LMO7	HDAC1	-0.0292408	0.752245	-0.130395	0.157519	OV_chr13	1	77	2	14	0.012987	Non-promiscuous	Non-aggregation prone
LMO7_HDAC3	LMO7	HDAC3	0.0627475	0.497811	-0.0569638	0.543606	OV_chr13	1	16	2	14	0.0625	Non-promiscuous	Non-aggregation prone
LMO7_HIST1H1A	LMO7	HIST1H1A	0.0280736	0.761834	0.149793	0.103951	OV_chr13	1	4	2	14	0.25	Non-promiscuous	Non-aggregation prone
LMO7_MYO1E	LMO7	MYO1E	0.220282	0.016072	0.141468	0.124863	OV_chr13	1	2	2	14	0.5	Non-promiscuous	Non-aggregation prone
LMO7_SIKE1	LMO7	SIKE1	-0.05287	0.567962	0.296257	0.0888914	OV_chr13	1	2	2	14	0.5	Non-promiscuous	Non-aggregation prone
LMO7_SPTAN1	LMO7	SPTAN1	0.367319	3.96882e-05	0.103867	0.260954	OV_chr13	1	5	2	14	0.2	Non-promiscuous	Non-aggregation prone
MYH9_LMO7	MYH9	LMO7	0.564711	3.50451e-10	0.597584	1.69842e-11	BRCA_chr22	1	3	2	12	0.333333	Non-promiscuous	Non-aggregation prone
MYH9_ACTA2	MYH9	ACTA2	0.475721	2.91848e-07	0.412088	1.25497e-05	BRCA_chr22	1	3	2	12	0.333333	Non-promiscuous	Non-aggregation prone
MYH9_ACTB	MYH9	ACTB	0.370039	0.000102229	0.0131557	0.894037	BRCA_chr22	1	24	2	12	0.0416667	Non-promiscuous	Non-aggregation prone
MYH9_MYL12A	MYH9	MYL12A	0.0493662	0.593921	0.943897	0	OV_chr22	1	2	2	12	0.5	Non-promiscuous	Non-aggregation prone
MYH9_MYL6	MYH9	MYL6	-0.182873	0.0465171	0.941347	0	OV_chr22	1	2	2	12	0.5	Non-promiscuous	Non-aggregation prone
MYH9_CNN3	MYH9	CNN3	0.225011	0.0138819	0.778835	0	OV_chr22	1	2	2	12	0.5	Non-promiscuous	Non-aggregation prone
MYH9_MYO1E	MYH9	MYO1E	0.589795	1.69287e-12	0.639574	4.88498e-15	OV_chr22	1	2	2	12	0.5	Non-promiscuous	Non-aggregation prone
MYH9_LMO7	MYH9	LMO7	0.564711	3.50451e-10	0.597584	1.69842e-11	BRCA_chr22	1	3	2	12	0.333333	Non-promiscuous	Non-aggregation prone
MYH9_WIPF1	MYH9	WIPF1	0.460077	1.40866e-07	0.575602	2.94281e-09	OV_chr22	1	5	2	12	0.2	Non-promiscuous	Non-aggregation prone
MYH9_WAS	MYH9	WAS	0.465988	9.26014e-08	0.395875	1.8624e-05	OV_chr22	1	5	2	12	0.2	Non-promiscuous	Non-aggregation prone
MYH9_EMD	MYH9	EMD	0.0718018	0.466686	0.220537	0.0237784	BRCA_chr22	1	10	2	12	0.1	Non-promiscuous	Non-aggregation prone
MYH9_SPTAN1	MYH9	SPTAN1	0.508282	3.60999e-09	-0.194317	0.0342087	OV_chr22	1	5	2	12	0.2	Non-promiscuous	Non-aggregation prone
MYH9_SIKE1	MYH9	SIKE1	-0.143697	0.11897	-0.0912147	0.607919	OV_chr22	1	2	2	12	0.5	Non-promiscuous	Non-aggregation prone
MRPS31_DAP3	MRPS31	DAP3	0.0116935	0.899559	0.696603	0	OV_chr13	2	2	2	77	1	Non-promiscuous	Non-aggregation prone
MRPS31_MRPL10	MRPS31	MRPL10	0.103554	0.262403	0.42858	2.69539e-06	OV_chr13	1	3	2	77	0.333333	Non-promiscuous	Non-aggregation prone
MRPS31_MRPL11	MRPS31	MRPL11	-0.0321891	0.728196	0.369983	3.45222e-05	OV_chr13	1	3	2	77	0.333333	Non-promiscuous	Non-aggregation prone
MRPS31_MRPL12	MRPS31	MRPL12	-0.0823102	0.373502	0.393306	9.65081e-06	OV_chr13	1	3	2	77	0.333333	Non-promiscuous	Non-aggregation prone
MRPS31_MRPL13	MRPS31	MRPL13	-0.117035	0.204947	0.45202	3.51449e-07	OV_chr13	1	3	2	77	0.333333	Non-promiscuous	Non-aggregation prone
MRPS31_MRPL14	MRPS31	MRPL14	-0.256965	0.00478592	0.367131	0.000136404	OV_chr13	1	3	2	77	0.333333	Non-promiscuous	Non-aggregation prone
MRPS31_MRPL15	MRPS31	MRPL15	-0.158987	0.0841599	0.432787	8.84694e-07	OV_chr13	1	3	2	77	0.333333	Non-promiscuous	Non-aggregation prone
MRPS31_MRPL16	MRPS31	MRPL16	-0.104394	0.25853	0.382503	6.14622e-05	OV_chr13	1	3	2	77	0.333333	Non-promiscuous	Non-aggregation prone
MRPS31_MRPL17	MRPS31	MRPL17	-0.0912334	0.323744	0.307043	0.000682483	OV_chr13	1	3	2	77	0.333333	Non-promiscuous	Non-aggregation prone
MRPS31_MRPL18	MRPS31	MRPL18	0.00033471	0.997117	0.453536	5.76666e-07	OV_chr13	1	3	2	77	0.333333	Non-promiscuous	Non-aggregation prone
MRPS31_MRPL19	MRPS31	MRPL19	-0.0499074	0.589876	0.403817	5.26056e-06	OV_chr13	1	3	2	77	0.333333	Non-promiscuous	Non-aggregation prone
MRPS31_MRPL2	MRPS31	MRPL2	-0.0929355	0.314761	0.37555	0.000108877	OV_chr13	1	3	2	77	0.333333	Non-promiscuous	Non-aggregation prone
MRPS31_MRPL20	MRPS31	MRPL20	-0.0882709	0.339768	0.416037	8.2884e-05	OV_chr13	1	3	2	77	0.333333	Non-promiscuous	Non-aggregation prone
MRPS31_MRPL21	MRPS31	MRPL21	0.017056	0.853929	0.414763	4.47398e-06	OV_chr13	1	3	2	77	0.333333	Non-promiscuous	Non-aggregation prone
MRPS31_MRPL22	MRPS31	MRPL22	-0.0140649	0.87933	0.412557	8.28116e-06	OV_chr13	1	3	2	77	0.333333	Non-promiscuous	Non-aggregation prone
MRPS31_MRPL23	MRPS31	MRPL23	0.07714	0.40436	0.327448	0.000451386	OV_chr13	1	3	2	77	0.333333	Non-promiscuous	Non-aggregation prone
MRPS31_MRPL24	MRPS31	MRPL24	0.055804	0.546645	0.337879	0.000171232	OV_chr13	1	3	2	77	0.333333	Non-promiscuous	Non-aggregation prone
MRPS31_MRPL27	MRPS31	MRPL27	0.025089	0.786512	0.333642	0.00265748	OV_chr13	1	3	2	77	0.333333	Non-promiscuous	Non-aggregation prone
MRPS31_MRPL28	MRPS31	MRPL28	-0.0220624	0.811756	0.474243	9.81555e-08	OV_chr13	1	3	2	77	0.333333	Non-promiscuous	Non-aggregation prone
MRPS31_MRPL3	MRPS31	MRPL3	0.028251	0.760374	0.384872	3.03518e-05	OV_chr13	1	3	2	77	0.333333	Non-promiscuous	Non-aggregation prone
MRPS31_MRPL30	MRPS31	MRPL30	0.032474	0.725886	0.288835	0.00280617	OV_chr13	1	3	2	77	0.333333	Non-promiscuous	Non-aggregation prone
MRPS31_MRPL32	MRPS31	MRPL32	-0.0492309	0.594934	0.338128	0.000661098	OV_chr13	1	3	2	77	0.333333	Non-promiscuous	Non-aggregation prone
MRPS31_MRPL33	MRPS31	MRPL33	-0.0462826	0.6172	0.351437	0.00199032	OV_chr13	1	3	2	77	0.333333	Non-promiscuous	Non-aggregation prone
MRPS31_MRPL37	MRPS31	MRPL37	0.011608	0.900289	0.389456	1.42476e-05	OV_chr13	1	3	2	77	0.333333	Non-promiscuous	Non-aggregation prone
MRPS31_MRPL38	MRPS31	MRPL38	-0.0282866	0.760081	0.42222	2.60097e-06	OV_chr13	1	3	2	77	0.333333	Non-promiscuous	Non-aggregation prone
MRPS31_MRPL39	MRPS31	MRPL39	0.0842117	0.362526	0.48043	3.21168e-08	OV_chr13	1	3	2	77	0.333333	Non-promiscuous	Non-aggregation prone
MRPS31_MRPL4	MRPS31	MRPL4	-0.018231	0.843989	0.400208	7.79441e-06	OV_chr13	1	3	2	77	0.333333	Non-promiscuous	Non-aggregation prone
MRPS31_MRPL40	MRPS31	MRPL40	-0.160027	0.0821254	0.279902	0.00244857	OV_chr13	1	3	2	77	0.333333	Non-promiscuous	Non-aggregation prone
MRPS31_MRPL41	MRPS31	MRPL41	-0.0812064	0.379967	0.425562	1.55524e-06	OV_chr13	1	3	2	77	0.333333	Non-promiscuous	Non-aggregation prone
MRPS31_MRPL42	MRPS31	MRPL42	0.0948725	0.304736	0.372796	0.000911485	OV_chr13	1	3	2	77	0.333333	Non-promiscuous	Non-aggregation prone
MRPS31_MRPL43	MRPS31	MRPL43	0.0528628	0.568015	0.457046	3.19316e-07	OV_chr13	1	3	2	77	0.333333	Non-promiscuous	Non-aggregation prone
MRPS31_MRPL44	MRPS31	MRPL44	0.0769406	0.40558	0.410803	3.47428e-06	OV_chr13	1	3	2	77	0.333333	Non-promiscuous	Non-aggregation prone
MRPS31_MRPL45	MRPS31	MRPL45	0.147372	0.109728	0.463705	2.03791e-07	OV_chr13	1	3	2	77	0.333333	Non-promiscuous	Non-aggregation prone
MRPS31_MRPL46	MRPS31	MRPL46	-0.0206381	0.823705	0.202868	0.0289582	OV_chr13	1	3	2	77	0.333333	Non-promiscuous	Non-aggregation prone
MRPS31_MRPL47	MRPS31	MRPL47	0.0576485	0.533448	0.451636	3.60587e-07	OV_chr13	1	3	2	77	0.333333	Non-promiscuous	Non-aggregation prone
MRPS31_MRPL48	MRPS31	MRPL48	0.062662	0.498398	0.378555	3.28207e-05	OV_chr13	1	3	2	77	0.333333	Non-promiscuous	Non-aggregation prone
MRPS31_MRPL49	MRPS31	MRPL49	-0.0637943	0.490653	0.384155	1.60987e-05	OV_chr13	1	3	2	77	0.333333	Non-promiscuous	Non-aggregation prone
MRPS31_MRPL50	MRPS31	MRPL50	-0.0541305	0.558756	0.332491	0.000320607	OV_chr13	1	3	2	77	0.333333	Non-promiscuous	Non-aggregation prone
MRPS31_MRPL51	MRPS31	MRPL51	-0.069869	0.450214	0.523693	1.94026e-07	OV_chr13	1	3	2	77	0.333333	Non-promiscuous	Non-aggregation prone
MRPS31_MRPL53	MRPS31	MRPL53	-0.0530836	0.566397	0.38034	3.2473e-05	OV_chr13	1	3	2	77	0.333333	Non-promiscuous	Non-aggregation prone
MRPS31_MRPL54	MRPS31	MRPL54	0.0536177	0.562492	0.310659	0.00476243	OV_chr13	1	3	2	77	0.333333	Non-promiscuous	Non-aggregation prone
MRPS31_MRPL55	MRPS31	MRPL55	0.0323672	0.726752	0.349319	0.000558841	OV_chr13	1	3	2	77	0.333333	Non-promiscuous	Non-aggregation prone
MRPS31_MRPL9	MRPS31	MRPL9	0.046895	0.612545	0.401752	3.42843e-05	OV_chr13	1	3	2	77	0.333333	Non-promiscuous	Non-aggregation prone
MRPS31_MRPS10	MRPS31	MRPS10	-0.030302	0.743561	0.613734	1.2863e-12	OV_chr13	2	2	2	77	1	Non-promiscuous	Non-aggregation prone
MRPS31_MRPS11	MRPS31	MRPS11	-0.107015	0.246701	0.34938	0.000225571	OV_chr13	2	2	2	77	1	Non-promiscuous	Non-aggregation prone
MRPS31_MRPS12	MRPS31	MRPS12	0.0165931	0.857851	0.555611	3.58909e-10	OV_chr13	2	2	2	77	1	Non-promiscuous	Non-aggregation prone
MRPS31_MRPS14	MRPS31	MRPS14	0.0756872	0.413295	0.321095	0.0109396	OV_chr13	2	2	2	77	1	Non-promiscuous	Non-aggregation prone
MRPS31_MRPS15	MRPS31	MRPS15	-0.182211	0.0473297	0.743305	0	OV_chr13	2	2	2	77	1	Non-promiscuous	Non-aggregation prone
MRPS31_MRPS16	MRPS31	MRPS16	-0.136861	0.137753	0.539492	4.13904e-10	OV_chr13	2	2	2	77	1	Non-promiscuous	Non-aggregation prone
MRPS31_MRPS17	MRPS31	MRPS17	-0.0729882	0.430196	0.603748	5.78426e-13	OV_chr13	2	2	2	77	1	Non-promiscuous	Non-aggregation prone
MRPS31_MRPS18A	MRPS31	MRPS18A	-0.0621849	0.501681	0.443425	1.37252e-06	OV_chr13	2	2	2	77	1	Non-promiscuous	Non-aggregation prone
MRPS31_MRPS18B	MRPS31	MRPS18B	0.014535	0.87533	0.525771	2.63684e-09	OV_chr13	2	2	2	77	1	Non-promiscuous	Non-aggregation prone
MRPS31_MRPS18C	MRPS31	MRPS18C	-0.15663	0.0889216	0.292491	0.0190092	OV_chr13	2	2	2	77	1	Non-promiscuous	Non-aggregation prone
MRPS31_MRPS2	MRPS31	MRPS2	0.0466671	0.614276	0.627216	3.84137e-14	OV_chr13	2	2	2	77	1	Non-promiscuous	Non-aggregation prone
MRPS31_MRPS21	MRPS31	MRPS21	0.0455776	0.622578	0.633424	8.61533e-14	OV_chr13	2	2	2	77	1	Non-promiscuous	Non-aggregation prone
MRPS31_MRPS22	MRPS31	MRPS22	0.195713	0.0329154	0.648989	1.33227e-15	OV_chr13	2	2	2	77	1	Non-promiscuous	Non-aggregation prone
MRPS31_MRPS23	MRPS31	MRPS23	0.0470161	0.611627	0.697215	0	OV_chr13	2	2	2	77	1	Non-promiscuous	Non-aggregation prone
MRPS31_MRPS24	MRPS31	MRPS24	0.028194	0.760843	0.431579	0.000896784	OV_chr13	2	2	2	77	1	Non-promiscuous	Non-aggregation prone
MRPS31_MRPS25	MRPS31	MRPS25	-0.0620567	0.502565	0.598832	6.31495e-13	OV_chr13	2	2	2	77	1	Non-promiscuous	Non-aggregation prone
MRPS31_MRPS26	MRPS31	MRPS26	0.0468737	0.612708	0.537105	4.2909e-10	OV_chr13	2	2	2	77	1	Non-promiscuous	Non-aggregation prone
MRPS31_MRPS27	MRPS31	MRPS27	0.140101	0.128587	0.546973	2.11738e-10	OV_chr13	2	2	2	77	1	Non-promiscuous	Non-aggregation prone
MRPS31_MRPS28	MRPS31	MRPS28	0.0815482	0.377958	0.575067	2.20761e-11	OV_chr13	2	2	2	77	1	Non-promiscuous	Non-aggregation prone
MRPS31_MRPS30	MRPS31	MRPS30	-0.0303874	0.742863	0.407658	5.57318e-06	OV_chr13	2	2	2	77	1	Non-promiscuous	Non-aggregation prone
MRPS31_MRPS33	MRPS31	MRPS33	0.0851018	0.357456	0.766537	4.44089e-16	OV_chr13	2	2	2	77	1	Non-promiscuous	Non-aggregation prone
MRPS31_MRPS34	MRPS31	MRPS34	-0.16962	0.0651556	0.515102	7.28004e-09	OV_chr13	2	2	2	77	1	Non-promiscuous	Non-aggregation prone
MRPS31_MRPS35	MRPS31	MRPS35	-0.058325	0.528648	0.747742	0	OV_chr13	2	2	2	77	1	Non-promiscuous	Non-aggregation prone
MRPS31_MRPS36	MRPS31	MRPS36	0.0840122	0.363667	0.293854	0.00118005	OV_chr13	2	2	2	77	1	Non-promiscuous	Non-aggregation prone
MRPS31_MRPS5	MRPS31	MRPS5	0.0602977	0.514775	0.722226	0	OV_chr13	2	2	2	77	1	Non-promiscuous	Non-aggregation prone
MRPS31_MRPS6	MRPS31	MRPS6	-0.0621421	0.501975	0.501251	8.59844e-09	OV_chr13	2	2	2	77	1	Non-promiscuous	Non-aggregation prone
MRPS31_MRPS7	MRPS31	MRPS7	-0.0853368	0.356125	0.634806	1.9762e-14	OV_chr13	2	2	2	77	1	Non-promiscuous	Non-aggregation prone
MRPS31_MRPS9	MRPS31	MRPS9	0.201282	0.0281588	0.73622	0	OV_chr13	2	2	2	77	1	Non-promiscuous	Non-aggregation prone
MRPS31_MRPL27	MRPS31	MRPL27	0.025089	0.786512	0.333642	0.00265748	OV_chr13	1	3	2	77	0.333333	Non-promiscuous	Non-aggregation prone
LACTB_MRPS31	LACTB	MRPS31	0.150593	0.161365	-0.0554039	0.608163	COREAD_chr15	1	3	2	77	0.333333	Non-promiscuous	Non-aggregation prone
LACTB_DAP3	LACTB	DAP3	0.345743	0.000969051	-0.188522	0.0785755	COREAD_chr15	1	3	2	77	0.333333	Non-promiscuous	Non-aggregation prone
LACTB_MRPL10	LACTB	MRPL10	0.0638583	0.554465	0.0257826	0.811537	COREAD_chr15	2	2	2	77	1	Non-promiscuous	Non-aggregation prone
LACTB_MRPL11	LACTB	MRPL11	0.070621	0.513223	-0.302965	0.00411527	COREAD_chr15	2	2	2	77	1	Non-promiscuous	Non-aggregation prone
LACTB_MRPL13	LACTB	MRPL13	0.277923	0.00874838	-0.343826	0.00103858	COREAD_chr15	2	2	2	77	1	Non-promiscuous	Non-aggregation prone
LACTB_MRPL14	LACTB	MRPL14	0.126343	0.240811	-0.26434	0.0128208	COREAD_chr15	2	2	2	77	1	Non-promiscuous	Non-aggregation prone
LACTB_MRPL15	LACTB	MRPL15	0.294618	0.00533012	-0.216104	0.0431542	COREAD_chr15	2	2	2	77	1	Non-promiscuous	Non-aggregation prone
LACTB_MRPL16	LACTB	MRPL16	0.296045	0.0051023	-0.155632	0.147638	COREAD_chr15	2	2	2	77	1	Non-promiscuous	Non-aggregation prone
LACTB_MRPL17	LACTB	MRPL17	0.0685076	0.52594	-0.386784	0.000197299	COREAD_chr15	2	2	2	77	1	Non-promiscuous	Non-aggregation prone
LACTB_MRPL18	LACTB	MRPL18	0.343383	0.00105527	-0.118479	0.271587	COREAD_chr15	2	2	2	77	1	Non-promiscuous	Non-aggregation prone
LACTB_MRPL19	LACTB	MRPL19	0.678085	3.94795e-13	-0.251348	0.0181672	COREAD_chr15	2	2	2	77	1	Non-promiscuous	Non-aggregation prone
LACTB_MRPL2	LACTB	MRPL2	-0.170882	0.111424	-0.151596	0.158563	COREAD_chr15	2	2	2	77	1	Non-promiscuous	Non-aggregation prone
LACTB_MRPL20	LACTB	MRPL20	0.438731	1.90546e-05	-0.167097	0.119694	COREAD_chr15	2	2	2	77	1	Non-promiscuous	Non-aggregation prone
LACTB_MRPL21	LACTB	MRPL21	0.168011	0.117655	-0.0824307	0.445157	COREAD_chr15	2	2	2	77	1	Non-promiscuous	Non-aggregation prone
LACTB_MRPL22	LACTB	MRPL22	0.326477	0.00190687	-0.195626	0.0677621	COREAD_chr15	2	2	2	77	1	Non-promiscuous	Non-aggregation prone
LACTB_MRPL23	LACTB	MRPL23	-0.190589	0.0752959	-0.0767849	0.477049	COREAD_chr15	2	2	2	77	1	Non-promiscuous	Non-aggregation prone
LACTB_MRPL24	LACTB	MRPL24	-0.0516361	0.632805	0.034073	0.752644	COREAD_chr15	2	2	2	77	1	Non-promiscuous	Non-aggregation prone
LACTB_MRPL27	LACTB	MRPL27	0.146314	0.173749	-0.0956721	0.375247	COREAD_chr15	2	2	2	77	1	Non-promiscuous	Non-aggregation prone
LACTB_MRPL28	LACTB	MRPL28	-0.0535909	0.619968	-0.279007	0.00847861	COREAD_chr15	2	2	2	77	1	Non-promiscuous	Non-aggregation prone
LACTB_MRPL3	LACTB	MRPL3	0.54519	3.97002e-08	-0.224849	0.0351901	COREAD_chr15	2	2	2	77	1	Non-promiscuous	Non-aggregation prone
LACTB_MRPL30	LACTB	MRPL30	0.526364	1.38518e-07	-0.104398	0.33305	COREAD_chr15	2	2	2	77	1	Non-promiscuous	Non-aggregation prone
LACTB_MRPL32	LACTB	MRPL32	0.559843	1.42151e-08	-0.0594918	0.581914	COREAD_chr15	2	2	2	77	1	Non-promiscuous	Non-aggregation prone
LACTB_MRPL34	LACTB	MRPL34	0.267726	0.0116758	-0.200944	0.0604811	COREAD_chr15	2	2	2	77	1	Non-promiscuous	Non-aggregation prone
LACTB_MRPL37	LACTB	MRPL37	0.406361	8.55034e-05	-0.0158698	0.883327	COREAD_chr15	2	2	2	77	1	Non-promiscuous	Non-aggregation prone
LACTB_MRPL38	LACTB	MRPL38	-0.101247	0.347929	-0.228808	0.0320123	COREAD_chr15	2	2	2	77	1	Non-promiscuous	Non-aggregation prone
LACTB_MRPL39	LACTB	MRPL39	0.527156	1.3162e-07	-0.195215	0.0683524	COREAD_chr15	2	2	2	77	1	Non-promiscuous	Non-aggregation prone
LACTB_MRPL4	LACTB	MRPL4	-0.217164	0.0421159	-0.22112	0.0384213	COREAD_chr15	2	2	2	77	1	Non-promiscuous	Non-aggregation prone
LACTB_MRPL40	LACTB	MRPL40	0.372829	0.000347115	-0.169226	0.114986	COREAD_chr15	2	2	2	77	1	Non-promiscuous	Non-aggregation prone
LACTB_MRPL41	LACTB	MRPL41	-0.070938	0.511329	0.0470746	0.66318	COREAD_chr15	2	2	2	77	1	Non-promiscuous	Non-aggregation prone
LACTB_MRPL42	LACTB	MRPL42	0.638512	2.1914e-11	0.0512528	0.635335	COREAD_chr15	2	2	2	77	1	Non-promiscuous	Non-aggregation prone
LACTB_MRPL43	LACTB	MRPL43	0.0916664	0.395658	-0.128845	0.231545	COREAD_chr15	2	2	2	77	1	Non-promiscuous	Non-aggregation prone
LACTB_MRPL44	LACTB	MRPL44	0.708658	1.11022e-14	-0.139224	0.195779	COREAD_chr15	2	2	2	77	1	Non-promiscuous	Non-aggregation prone
LACTB_MRPL45	LACTB	MRPL45	0.303124	0.00409474	-0.036267	0.737278	COREAD_chr15	2	2	2	77	1	Non-promiscuous	Non-aggregation prone
LACTB_MRPL47	LACTB	MRPL47	0.553996	2.15433e-08	-0.0593312	0.582935	COREAD_chr15	2	2	2	77	1	Non-promiscuous	Non-aggregation prone
LACTB_MRPL48	LACTB	MRPL48	0.205488	0.054778	-0.00153997	0.988639	COREAD_chr15	2	2	2	77	1	Non-promiscuous	Non-aggregation prone
LACTB_MRPL49	LACTB	MRPL49	0.198602	0.0636057	-0.154054	0.15184	COREAD_chr15	2	2	2	77	1	Non-promiscuous	Non-aggregation prone
LACTB_MRPL50	LACTB	MRPL50	0.659593	2.77955e-12	-0.135121	0.209412	COREAD_chr15	2	2	2	77	1	Non-promiscuous	Non-aggregation prone
LACTB_MRPL53	LACTB	MRPL53	-0.119175	0.26876	-0.136211	0.205726	COREAD_chr15	2	2	2	77	1	Non-promiscuous	Non-aggregation prone
LACTB_MRPL55	LACTB	MRPL55	-0.257758	0.0153283	0.0417445	0.699373	COREAD_chr15	2	2	2	77	1	Non-promiscuous	Non-aggregation prone
LACTB_MRPL9	LACTB	MRPL9	0.141682	0.187924	-0.291424	0.00587317	COREAD_chr15	2	2	2	77	1	Non-promiscuous	Non-aggregation prone
LACTB_MRPS10	LACTB	MRPS10	0.461519	6.01844e-06	0.0231964	0.830142	COREAD_chr15	1	3	2	77	0.333333	Non-promiscuous	Non-aggregation prone
LACTB_MRPS12	LACTB	MRPS12	-0.00651615	0.951954	-0.258649	0.0149658	COREAD_chr15	1	3	2	77	0.333333	Non-promiscuous	Non-aggregation prone
LACTB_MRPS14	LACTB	MRPS14	0.251981	0.0178677	0.0873797	0.418214	COREAD_chr15	1	3	2	77	0.333333	Non-promiscuous	Non-aggregation prone
LACTB_MRPS15	LACTB	MRPS15	0.58906	1.57011e-09	-0.187392	0.0804156	COREAD_chr15	1	3	2	77	0.333333	Non-promiscuous	Non-aggregation prone
LACTB_MRPS16	LACTB	MRPS16	0.458983	6.87025e-06	0.15014	0.162646	COREAD_chr15	1	3	2	77	0.333333	Non-promiscuous	Non-aggregation prone
LACTB_MRPS17	LACTB	MRPS17	0.12305	0.253392	-0.0843466	0.434613	COREAD_chr15	1	3	2	77	0.333333	Non-promiscuous	Non-aggregation prone
LACTB_MRPS18A	LACTB	MRPS18A	0.335335	0.00140436	0.00871133	0.935798	COREAD_chr15	1	3	2	77	0.333333	Non-promiscuous	Non-aggregation prone
LACTB_MRPS18B	LACTB	MRPS18B	0.255204	0.0164096	-0.0947222	0.380028	COREAD_chr15	1	3	2	77	0.333333	Non-promiscuous	Non-aggregation prone
LACTB_MRPS2	LACTB	MRPS2	-0.0580994	0.590796	-0.123287	0.252469	COREAD_chr15	1	3	2	77	0.333333	Non-promiscuous	Non-aggregation prone
LACTB_MRPS21	LACTB	MRPS21	0.0123102	0.90937	-0.0490741	0.649795	COREAD_chr15	1	3	2	77	0.333333	Non-promiscuous	Non-aggregation prone
LACTB_MRPS22	LACTB	MRPS22	0.551337	2.59595e-08	-0.0992536	0.35755	COREAD_chr15	1	3	2	77	0.333333	Non-promiscuous	Non-aggregation prone
LACTB_MRPS23	LACTB	MRPS23	0.382498	0.000235313	-0.0376832	0.727413	COREAD_chr15	1	3	2	77	0.333333	Non-promiscuous	Non-aggregation prone
LACTB_MRPS24	LACTB	MRPS24	-0.225388	0.0347425	0.0637526	0.555122	COREAD_chr15	1	3	2	77	0.333333	Non-promiscuous	Non-aggregation prone
LACTB_MRPS25	LACTB	MRPS25	0.0326512	0.762655	-0.227578	0.0329726	COREAD_chr15	1	3	2	77	0.333333	Non-promiscuous	Non-aggregation prone
LACTB_MRPS26	LACTB	MRPS26	-0.0108837	0.919835	-0.137743	0.200622	COREAD_chr15	1	3	2	77	0.333333	Non-promiscuous	Non-aggregation prone
LACTB_MRPS27	LACTB	MRPS27	0.483234	1.85347e-06	-0.0602168	0.577313	COREAD_chr15	1	3	2	77	0.333333	Non-promiscuous	Non-aggregation prone
LACTB_MRPS28	LACTB	MRPS28	0.430224	2.86961e-05	-0.0392404	0.716617	COREAD_chr15	1	3	2	77	0.333333	Non-promiscuous	Non-aggregation prone
LACTB_MRPS30	LACTB	MRPS30	0.431897	2.64986e-05	-0.117961	0.273703	COREAD_chr15	1	3	2	77	0.333333	Non-promiscuous	Non-aggregation prone
LACTB_MRPS31	LACTB	MRPS31	0.150593	0.161365	-0.0554039	0.608163	COREAD_chr15	1	3	2	77	0.333333	Non-promiscuous	Non-aggregation prone
LACTB_MRPS34	LACTB	MRPS34	-0.29571	0.00515495	-0.0218679	0.839737	COREAD_chr15	1	3	2	77	0.333333	Non-promiscuous	Non-aggregation prone
LACTB_MRPS35	LACTB	MRPS35	0.651914	6.00853e-12	-0.157864	0.141847	COREAD_chr15	1	3	2	77	0.333333	Non-promiscuous	Non-aggregation prone
LACTB_MRPS36	LACTB	MRPS36	0.480135	2.20372e-06	-0.0210848	0.845403	COREAD_chr15	1	3	2	77	0.333333	Non-promiscuous	Non-aggregation prone
LACTB_MRPS5	LACTB	MRPS5	0.310715	0.00321514	-0.0725637	0.501672	COREAD_chr15	1	3	2	77	0.333333	Non-promiscuous	Non-aggregation prone
LACTB_MRPS6	LACTB	MRPS6	0.304586	0.00391031	-0.219304	0.0400822	COREAD_chr15	1	3	2	77	0.333333	Non-promiscuous	Non-aggregation prone
LACTB_MRPS7	LACTB	MRPS7	0.375348	0.000314052	-0.356646	0.000648004	COREAD_chr15	1	3	2	77	0.333333	Non-promiscuous	Non-aggregation prone
LACTB_MRPS9	LACTB	MRPS9	0.317002	0.00261902	-0.116806	0.278461	COREAD_chr15	1	3	2	77	0.333333	Non-promiscuous	Non-aggregation prone
LACTB_MRPL27	LACTB	MRPL27	0.146314	0.173749	-0.0956721	0.375247	COREAD_chr15	2	2	2	77	1	Non-promiscuous	Non-aggregation prone
PDS5B_CDCA5	PDS5B	CDCA5	0.274192	0.00254819	0.333715	0.013661	OV_chr13	2	2	2	5	1	Non-promiscuous	Non-aggregation prone
PDS5B_PDS5A	PDS5B	PDS5A	0.10418	0.259511	0.124811	0.17623	OV_chr13	2	2	2	5	1	Non-promiscuous	Non-aggregation prone
PDS5B_RAD21	PDS5B	RAD21	0.113894	0.217449	0.550634	8.70859e-11	OV_chr13	2	10	2	5	0.2	Non-promiscuous	Non-aggregation prone
PDS5B_SMC1A	PDS5B	SMC1A	0.315276	0.000478597	0.63199	1.28786e-14	OV_chr13	2	12	2	5	0.166667	Non-promiscuous	Non-aggregation prone
PDS5B_SMC3	PDS5B	SMC3	0.300819	0.000886546	0.638677	5.55112e-15	OV_chr13	2	11	2	5	0.181818	Non-promiscuous	Non-aggregation prone
CTDP1_GTF2F2	CTDP1	GTF2F2	0.192442	0.04921	0.305546	0.00152649	BRCA_chr18	1	6	3	20	0.166667	Non-promiscuous	Aggregation prone
CTDP1_ERH	CTDP1	ERH	0.0697491	0.479553	0.309755	0.00130206	BRCA_chr18	2	4	3	20	0.5	Non-promiscuous	Aggregation prone
CTDP1_GTF2B	CTDP1	GTF2B	0.267054	0.00588839	-0.401762	2.15711e-05	BRCA_chr18	1	9	3	20	0.111111	Non-promiscuous	Aggregation prone
CTDP1_GTF2F1	CTDP1	GTF2F1	0.276135	0.00435365	0.543801	2.03511e-09	BRCA_chr18	3	11	3	20	0.272727	Non-promiscuous	Aggregation prone
CTDP1_GTF2F2	CTDP1	GTF2F2	0.192442	0.04921	0.305546	0.00152649	BRCA_chr18	1	6	3	20	0.166667	Non-promiscuous	Aggregation prone
CTDP1_POLR2B	CTDP1	POLR2B	0.3195	0.000892977	-0.281505	0.00362455	BRCA_chr18	3	10	3	20	0.3	Non-promiscuous	Aggregation prone
CTDP1_POLR2C	CTDP1	POLR2C	0.196527	0.0445014	-0.512015	2.36747e-08	BRCA_chr18	1	8	3	20	0.125	Non-promiscuous	Aggregation prone
CTDP1_POLR2D	CTDP1	POLR2D	0.185818	0.0577174	-0.580355	8.6553e-11	BRCA_chr18	1	7	3	20	0.142857	Non-promiscuous	Aggregation prone
CTDP1_POLR2E	CTDP1	POLR2E	0.277545	0.00415053	0.633672	4.01901e-13	BRCA_chr18	1	8	3	20	0.125	Non-promiscuous	Aggregation prone
CTDP1_POLR2F	CTDP1	POLR2F	-0.0282711	0.774662	0.256531	0.00825262	BRCA_chr18	1	7	3	20	0.142857	Non-promiscuous	Aggregation prone
CTDP1_POLR2G	CTDP1	POLR2G	0.0647937	0.511386	-0.586969	4.68487e-11	BRCA_chr18	1	7	3	20	0.142857	Non-promiscuous	Aggregation prone
CTDP1_POLR2H	CTDP1	POLR2H	0.0171263	0.862334	0.265996	0.00609518	BRCA_chr18	1	8	3	20	0.125	Non-promiscuous	Aggregation prone
CTDP1_POLR2I	CTDP1	POLR2I	0.0689509	0.484608	0.355795	0.000195448	BRCA_chr18	1	7	3	20	0.142857	Non-promiscuous	Aggregation prone
CTDP1_POLR2J	CTDP1	POLR2J	-0.221107	0.0234095	-0.0108128	0.912826	BRCA_chr18	1	7	3	20	0.142857	Non-promiscuous	Aggregation prone
CTDP1_POLR2K	CTDP1	POLR2K	-0.0630313	0.522964	-0.346465	0.00029401	BRCA_chr18	1	7	3	20	0.142857	Non-promiscuous	Aggregation prone
CTDP1_POLR2L	CTDP1	POLR2L	0.175689	0.0730206	-0.523761	9.84455e-09	BRCA_chr18	1	8	3	20	0.125	Non-promiscuous	Aggregation prone
CTDP1_RPAP1	CTDP1	RPAP1	0.142992	0.145619	-0.0600145	0.543086	BRCA_chr18	1	4	3	20	0.25	Non-promiscuous	Aggregation prone
CTDP1_STK38	CTDP1	STK38	0.0662554	0.501884	0.0229318	0.816384	BRCA_chr18	2	3	3	20	0.666667	Non-promiscuous	Aggregation prone
CTDP1_WDR77	CTDP1	WDR77	0.0790587	0.422745	-0.434346	3.66776e-06	BRCA_chr18	2	7	3	20	0.285714	Non-promiscuous	Aggregation prone
GTF2F2_ERCC2	GTF2F2	ERCC2	0.196105	0.03256	0.0928625	0.348451	OV_chr13	2	12	4	27	0.166667	Non-promiscuous	Non-aggregation prone
GTF2F2_ERCC3	GTF2F2	ERCC3	0.11514	0.212425	0.255461	0.00762209	OV_chr13	2	12	4	27	0.166667	Non-promiscuous	Non-aggregation prone
GTF2F2_GTF2B	GTF2F2	GTF2B	-0.129098	0.161724	0.150635	0.108072	OV_chr13	3	8	4	27	0.375	Non-promiscuous	Non-aggregation prone
GTF2F2_GTF2E1	GTF2F2	GTF2E1	0.137281	0.136537	0.0633307	0.507089	OV_chr13	2	6	4	27	0.333333	Non-promiscuous	Non-aggregation prone
GTF2F2_GTF2E2	GTF2F2	GTF2E2	0.118352	0.19986	0.230746	0.0143763	OV_chr13	2	5	4	27	0.4	Non-promiscuous	Non-aggregation prone
GTF2F2_GTF2F1	GTF2F2	GTF2F1	0.230103	0.0118189	0.808539	0	OV_chr13	4	11	4	27	0.363636	Non-promiscuous	Non-aggregation prone
GTF2F2_GTF2H1	GTF2F2	GTF2H1	-0.0261074	0.778066	0.197633	0.0413011	OV_chr13	2	10	4	27	0.2	Non-promiscuous	Non-aggregation prone
GTF2F2_GTF2H3	GTF2F2	GTF2H3	0.174904	0.057102	0.050509	0.640257	OV_chr13	2	10	4	27	0.2	Non-promiscuous	Non-aggregation prone
GTF2F2_GTF2H4	GTF2F2	GTF2H4	0.0753169	0.41559	0.0995927	0.398532	OV_chr13	2	10	4	27	0.2	Non-promiscuous	Non-aggregation prone
GTF2F2_MED21	GTF2F2	MED21	-0.0139795	0.880058	0.105125	0.347247	OV_chr13	1	22	4	27	0.0454545	Non-promiscuous	Non-aggregation prone
GTF2F2_POLR2B	GTF2F2	POLR2B	-0.137423	0.136127	0.357603	7.55e-05	OV_chr13	3	11	4	27	0.272727	Non-promiscuous	Non-aggregation prone
GTF2F2_POLR2C	GTF2F2	POLR2C	0.122013	0.186203	0.257429	0.00507846	OV_chr13	3	7	4	27	0.428571	Non-promiscuous	Non-aggregation prone
GTF2F2_POLR2D	GTF2F2	POLR2D	0.0422803	0.647988	0.124996	0.189133	OV_chr13	3	6	4	27	0.5	Non-promiscuous	Non-aggregation prone
GTF2F2_POLR2E	GTF2F2	POLR2E	0.0267341	0.772882	0.377767	2.68117e-05	OV_chr13	3	7	4	27	0.428571	Non-promiscuous	Non-aggregation prone
GTF2F2_POLR2G	GTF2F2	POLR2G	-0.0822604	0.373793	0.447549	3.03323e-06	OV_chr13	3	6	4	27	0.5	Non-promiscuous	Non-aggregation prone
GTF2F2_POLR2H	GTF2F2	POLR2H	0.0728885	0.430828	0.261491	0.00440213	OV_chr13	3	7	4	27	0.428571	Non-promiscuous	Non-aggregation prone
GTF2F2_POLR2I	GTF2F2	POLR2I	-0.0685586	0.458776	0.158387	0.0880814	OV_chr13	3	6	4	27	0.5	Non-promiscuous	Non-aggregation prone
GTF2F2_POLR2L	GTF2F2	POLR2L	-0.0928643	0.315133	0.326042	0.000688322	OV_chr13	3	7	4	27	0.428571	Non-promiscuous	Non-aggregation prone
GTF2F2_RPAP1	GTF2F2	RPAP1	0.08001	0.387049	0.0471119	0.652057	OV_chr13	1	5	4	27	0.2	Non-promiscuous	Non-aggregation prone
GTF2F2_TBP	GTF2F2	TBP	0.042672	0.644947	0.108497	0.290125	OV_chr13	2	24	4	27	0.0833333	Non-promiscuous	Non-aggregation prone
AKAP13_MAP3K20	AKAP13	MAP3K20	0.158838	0.0844558	-0.339338	0.000306584	OV_chr15	1	1	1	4	1	Non-promiscuous	Non-aggregation prone
AKAP13_PKN1	AKAP13	PKN1	0.291476	0.00129902	0.17428	0.0673397	OV_chr15	1	1	1	4	1	Non-promiscuous	Non-aggregation prone
AKAP13_MAPK14	AKAP13	MAPK14	0.221091	0.0384471	-0.104919	0.330633	COREAD_chr15	1	1	1	4	1	Non-promiscuous	Non-aggregation prone
IDH3A_IDH3B	IDH3A	IDH3B	0.102749	0.26615	0.889239	0	OV_chr15	1	1	1	2	1	Non-promiscuous	Non-aggregation prone
IDH3A_IDH3G	IDH3A	IDH3G	0.119399	0.195882	0.890144	0	OV_chr15	1	1	1	2	1	Non-promiscuous	Non-aggregation prone
VPS18_AKTIP	VPS18	AKTIP	0.352072	8.61536e-05	0.0556773	0.66733	OV_chr15	1	10	7	12	0.1	Promiscuous	Non-aggregation prone
VPS18_TGFBRAP1	VPS18	TGFBRAP1	0.650912	1.11022e-15	0.345651	0.000165448	OV_chr15	1	7	7	12	0.142857	Promiscuous	Non-aggregation prone
VPS18_VPS8	VPS18	VPS8	0.305355	0.000733069	0.374526	4.37417e-05	OV_chr15	1	7	7	12	0.142857	Promiscuous	Non-aggregation prone
VPS18_VPS16	VPS18	VPS16	0.427817	1.21564e-06	0.571329	1.15796e-11	OV_chr15	4	11	7	12	0.363636	Promiscuous	Non-aggregation prone
VPS18_VPS11	VPS18	VPS11	0.425823	1.37896e-06	0.509443	3.28149e-09	OV_chr15	5	7	7	12	0.714286	Promiscuous	Non-aggregation prone
VPS18_VPS41	VPS18	VPS41	0.489994	1.54984e-08	0.487046	1.94478e-08	OV_chr15	1	11	7	12	0.0909091	Promiscuous	Non-aggregation prone
VPS18_VPS33A	VPS18	VPS33A	0.335038	0.000195709	0.471236	6.33778e-08	OV_chr15	2	7	7	12	0.285714	Promiscuous	Non-aggregation prone
VPS18_STX7	VPS18	STX7	0.228892	0.0122834	0.419812	2.00668e-06	OV_chr15	1	7	7	12	0.142857	Promiscuous	Non-aggregation prone
VPS18_EEA1	VPS18	EEA1	0.34379	0.000129145	0.374754	2.68081e-05	OV_chr15	1	8	7	12	0.125	Promiscuous	Non-aggregation prone
VPS18_RAB5A	VPS18	RAB5A	0.453368	2.24626e-07	0.234276	0.0103335	OV_chr15	1	9	7	12	0.111111	Promiscuous	Non-aggregation prone
VPS18_HOOK1	VPS18	HOOK1	0.431171	9.81561e-07	-0.181684	0.0479847	OV_chr15	1	12	7	12	0.0833333	Promiscuous	Non-aggregation prone
MAP2K1_DVL2	MAP2K1	DVL2	0.28434	0.00172444	0.0962793	0.323879	OV_chr15	1	8	7	15	0.125	Promiscuous	Non-aggregation prone
MAP2K1_RAF1	MAP2K1	RAF1	0.324526	0.000317286	0.194366	0.0391239	OV_chr15	3	15	7	15	0.2	Promiscuous	Non-aggregation prone
MAP2K1_DVL2	MAP2K1	DVL2	0.28434	0.00172444	0.0962793	0.323879	OV_chr15	1	8	7	15	0.125	Promiscuous	Non-aggregation prone
MAP2K1_MAP2K2	MAP2K1	MAP2K2	0.331983	0.00022562	0.599459	5.89084e-13	OV_chr15	2	7	7	15	0.285714	Promiscuous	Non-aggregation prone
MAP2K1_WASL	MAP2K1	WASL	0.3409	0.00115348	0.172269	0.108506	COREAD_chr15	1	9	7	15	0.111111	Promiscuous	Non-aggregation prone
MAP2K1_PXN	MAP2K1	PXN	0.305026	0.00385623	0.140465	0.191783	COREAD_chr15	1	16	7	15	0.0625	Promiscuous	Non-aggregation prone
MAP2K1_PTK2	MAP2K1	PTK2	0.209028	0.0506465	-0.138027	0.199688	COREAD_chr15	1	18	7	15	0.0555556	Promiscuous	Non-aggregation prone
MAP2K1_DIAPH1	MAP2K1	DIAPH1	0.356694	6.8396e-05	0.125844	0.172652	OV_chr15	1	7	7	15	0.142857	Promiscuous	Non-aggregation prone
MAP2K1_LAMTOR2	MAP2K1	LAMTOR2	-0.106687	0.248159	0.125709	0.173118	OV_chr15	1	9	7	15	0.111111	Promiscuous	Non-aggregation prone
MAP2K1_LAMTOR3	MAP2K1	LAMTOR3	0.494576	9.69534e-07	0.119744	0.266463	COREAD_chr15	1	9	7	15	0.111111	Promiscuous	Non-aggregation prone
MAP2K1_YWHAE	MAP2K1	YWHAE	0.060725	0.511795	-0.0745335	0.420471	OV_chr15	3	11	7	15	0.272727	Promiscuous	Non-aggregation prone
COX5A_CMC1	COX5A	CMC1	0.283863	0.00175696	0.127018	0.287676	OV_chr15	1	1	1	13	1	Non-promiscuous	Non-aggregation prone
COX5A_COA1	COX5A	COA1	0.0424655	0.64655	0.370495	0.00953715	OV_chr15	1	1	1	13	1	Non-promiscuous	Non-aggregation prone
COX5A_COA3	COX5A	COA3	0.050762	0.583516	0.214527	0.021319	OV_chr15	1	2	1	13	0.5	Non-promiscuous	Non-aggregation prone
COX5A_COX15	COX5A	COX15	-0.267319	0.0032926	0.135733	0.153591	OV_chr15	1	1	1	13	1	Non-promiscuous	Non-aggregation prone
COX5A_COX4I1	COX5A	COX4I1	0.4499	2.84801e-07	0.843726	0	OV_chr15	1	1	1	13	1	Non-promiscuous	Non-aggregation prone
COX5A_COX6C	COX5A	COX6C	0.39629	8.14072e-06	0.781114	0	OV_chr15	1	1	1	13	1	Non-promiscuous	Non-aggregation prone
COX5A_SURF1	COX5A	SURF1	0.206908	0.0239604	0.0499658	0.714585	OV_chr15	1	2	1	13	0.5	Non-promiscuous	Non-aggregation prone
COX5A_TIMM21	COX5A	TIMM21	0.000113944	0.999019	0.167121	0.0868454	OV_chr15	1	1	1	13	1	Non-promiscuous	Non-aggregation prone
COX5A_COA3	COX5A	COA3	0.050762	0.583516	0.214527	0.021319	OV_chr15	1	2	1	13	0.5	Non-promiscuous	Non-aggregation prone
COX5A_TIMM21	COX5A	TIMM21	0.000113944	0.999019	0.167121	0.0868454	OV_chr15	1	1	1	13	1	Non-promiscuous	Non-aggregation prone
SNAP23_STX11	SNAP23	STX11	0.172062	0.0613247	-0.00905903	0.945709	OV_chr15	1	9	8	9	0.111111	Promiscuous	Non-aggregation prone
SNAP23_VAMP3	SNAP23	VAMP3	0.656969	3.62643e-12	0.312152	0.0030691	COREAD_chr15	1	12	8	9	0.0833333	Promiscuous	Non-aggregation prone
SNAP23_VAMP8	SNAP23	VAMP8	0.329259	0.00173386	-0.290094	0.00611354	COREAD_chr15	1	9	8	9	0.111111	Promiscuous	Non-aggregation prone
SNAP23_STX6	SNAP23	STX6	0.439168	5.83965e-07	0.1067	0.254281	OV_chr15	1	12	8	9	0.0833333	Promiscuous	Non-aggregation prone
SRP14_RPL39	SRP14	RPL39	0.214279	0.0192796	0.0711292	0.547026	OV_chr15	1	3	1	104	0.333333	Non-promiscuous	Non-aggregation prone
SRP14_SNU13	SRP14	SNU13	0.243989	0.00749398	0.352065	8.6184e-05	OV_chr15	1	2	1	104	0.5	Non-promiscuous	Non-aggregation prone
SRP14_ACTA2	SRP14	ACTA2	0.208869	0.0508258	-0.242901	0.02259	COREAD_chr15	1	2	1	104	0.5	Non-promiscuous	Non-aggregation prone
SRP14_ACTG2	SRP14	ACTG2	0.288067	0.00649639	-0.257591	0.015397	COREAD_chr15	1	1	1	104	1	Non-promiscuous	Non-aggregation prone
SRP14_IGF2BP1	SRP14	IGF2BP1	0.036755	0.733874	-0.14516	0.177204	COREAD_chr15	1	2	1	104	0.5	Non-promiscuous	Non-aggregation prone
SRP14_TUBA1A	SRP14	TUBA1A	0.173294	0.106388	0.197338	0.0653453	COREAD_chr15	1	5	1	104	0.2	Non-promiscuous	Non-aggregation prone
SRP14_SNU13	SRP14	SNU13	0.243989	0.00749398	0.352065	8.6184e-05	OV_chr15	1	2	1	104	0.5	Non-promiscuous	Non-aggregation prone
SRP14_NCL	SRP14	NCL	0.0299886	0.746122	0.56581	2.01061e-11	OV_chr15	1	8	1	104	0.125	Non-promiscuous	Non-aggregation prone
SRP14_HNRNPU	SRP14	HNRNPU	0.0221407	0.8111	0.484838	2.30188e-08	OV_chr15	1	10	1	104	0.1	Non-promiscuous	Non-aggregation prone
SRP14_HNRNPA1	SRP14	HNRNPA1	0.145848	0.11349	0.474904	4.8441e-08	OV_chr15	1	2	1	104	0.5	Non-promiscuous	Non-aggregation prone
SRP14_ILF3	SRP14	ILF3	-0.0404572	0.662215	0.452735	2.3463e-07	OV_chr15	1	7	1	104	0.142857	Non-promiscuous	Non-aggregation prone
SRP14_ILF2	SRP14	ILF2	0.268487	0.00315371	0.446318	3.62926e-07	OV_chr15	1	4	1	104	0.25	Non-promiscuous	Non-aggregation prone
SRP14_RPL27	SRP14	RPL27	0.109365	0.236417	0.405825	4.67364e-06	OV_chr15	1	4	1	104	0.25	Non-promiscuous	Non-aggregation prone
SRP14_TOP1	SRP14	TOP1	0.0858923	0.352991	0.399252	6.86406e-06	OV_chr15	1	8	1	104	0.125	Non-promiscuous	Non-aggregation prone
SRP14_DHX9	SRP14	DHX9	0.0575417	0.534208	0.397856	7.44001e-06	OV_chr15	1	9	1	104	0.111111	Non-promiscuous	Non-aggregation prone
SRP14_NOP58	SRP14	NOP58	0.205384	0.025041	0.375616	2.56004e-05	OV_chr15	1	1	1	104	1	Non-promiscuous	Non-aggregation prone
SRP14_FBL	SRP14	FBL	0.0801666	0.386117	0.366864	4.06417e-05	OV_chr15	1	4	1	104	0.25	Non-promiscuous	Non-aggregation prone
SRP14_RPS13	SRP14	RPS13	0.142551	0.121974	0.363866	4.74691e-05	OV_chr15	1	6	1	104	0.166667	Non-promiscuous	Non-aggregation prone
SRP14_RPL18	SRP14	RPL18	0.165633	0.123016	0.35671	0.000646434	COREAD_chr15	1	3	1	104	0.333333	Non-promiscuous	Non-aggregation prone
SRP14_HNRNPM	SRP14	HNRNPM	-0.0994516	0.281879	0.356338	6.96319e-05	OV_chr15	1	3	1	104	0.333333	Non-promiscuous	Non-aggregation prone
SRP14_NOP56	SRP14	NOP56	0.0568509	0.539136	0.350114	9.49041e-05	OV_chr15	1	1	1	104	1	Non-promiscuous	Non-aggregation prone
SRP14_U2AF1	SRP14	U2AF1	0.055626	0.547928	0.347002	0.00011053	OV_chr15	1	5	1	104	0.2	Non-promiscuous	Non-aggregation prone
SRP14_RPL7A	SRP14	RPL7A	0.248177	0.0197311	0.344526	0.00101271	COREAD_chr15	1	5	1	104	0.2	Non-promiscuous	Non-aggregation prone
SRP14_RPL31	SRP14	RPL31	0.234995	0.0100948	0.344317	0.000125903	OV_chr15	1	3	1	104	0.333333	Non-promiscuous	Non-aggregation prone
SRP14_RSL1D1	SRP14	RSL1D1	0.175267	0.0565799	0.335223	0.00019402	OV_chr15	1	1	1	104	1	Non-promiscuous	Non-aggregation prone
SRP14_RPL36	SRP14	RPL36	0.00654465	0.943684	0.333115	0.000214072	OV_chr15	1	4	1	104	0.25	Non-promiscuous	Non-aggregation prone
SRP14_RPL12	SRP14	RPL12	0.226868	0.0335385	0.329663	0.00170998	COREAD_chr15	1	4	1	104	0.25	Non-promiscuous	Non-aggregation prone
SRP14_RPL35	SRP14	RPL35	0.41957	4.72007e-05	0.328028	0.0018086	COREAD_chr15	1	3	1	104	0.333333	Non-promiscuous	Non-aggregation prone
SRP14_RPS11	SRP14	RPS11	0.192878	0.0717925	0.324353	0.00204926	COREAD_chr15	1	5	1	104	0.2	Non-promiscuous	Non-aggregation prone
SRP14_RPS9	SRP14	RPS9	0.395988	0.00013403	0.319577	0.00240499	COREAD_chr15	1	4	1	104	0.25	Non-promiscuous	Non-aggregation prone
SRP14_RPL24	SRP14	RPL24	0.513191	3.17788e-07	0.318809	0.00246709	COREAD_chr15	1	3	1	104	0.333333	Non-promiscuous	Non-aggregation prone
SRP14_RPL23	SRP14	RPL23	0.099765	0.280358	0.318402	0.000417135	OV_chr15	1	3	1	104	0.333333	Non-promiscuous	Non-aggregation prone
SRP14_RPL27A	SRP14	RPL27A	0.104629	0.257453	0.318053	0.000423615	OV_chr15	1	3	1	104	0.333333	Non-promiscuous	Non-aggregation prone
SRP14_RPS8	SRP14	RPS8	0.16539	0.0722493	0.313139	0.000525282	OV_chr15	1	4	1	104	0.25	Non-promiscuous	Non-aggregation prone
SRP14_RPL13A	SRP14	RPL13A	0.298792	0.00468777	0.309507	0.00334262	COREAD_chr15	1	4	1	104	0.25	Non-promiscuous	Non-aggregation prone
SRP14_RPL17	SRP14	RPL17	0.0905355	0.327474	0.309279	0.000620391	OV_chr15	1	3	1	104	0.333333	Non-promiscuous	Non-aggregation prone
SRP14_HIST1H1D	SRP14	HIST1H1D	0.217519	0.0174857	0.307734	0.000662718	OV_chr15	1	2	1	104	0.5	Non-promiscuous	Non-aggregation prone
SRP14_RPL35A	SRP14	RPL35A	0.137459	0.136025	0.306117	0.000709819	OV_chr15	1	4	1	104	0.25	Non-promiscuous	Non-aggregation prone
SRP14_RPL18A	SRP14	RPL18A	-0.108873	0.238542	0.303753	0.000784253	OV_chr15	1	4	1	104	0.25	Non-promiscuous	Non-aggregation prone
SRP14_RPL28	SRP14	RPL28	-0.131919	0.15268	0.301617	0.000857593	OV_chr15	1	4	1	104	0.25	Non-promiscuous	Non-aggregation prone
SRP14_RPS3A	SRP14	RPS3A	0.289581	0.00140148	0.295834	0.0010887	OV_chr15	1	4	1	104	0.25	Non-promiscuous	Non-aggregation prone
SRP14_RPS6	SRP14	RPS6	0.150897	0.101398	0.29317	0.00121319	OV_chr15	1	5	1	104	0.2	Non-promiscuous	Non-aggregation prone
SRP14_RPS2	SRP14	RPS2	-0.0491529	0.649269	0.291412	0.00587528	COREAD_chr15	1	4	1	104	0.25	Non-promiscuous	Non-aggregation prone
SRP14_RPL10	SRP14	RPL10	0.0845891	0.360371	0.286191	0.00160335	OV_chr15	1	3	1	104	0.333333	Non-promiscuous	Non-aggregation prone
SRP14_RPS14	SRP14	RPS14	0.237708	0.00923729	0.285031	0.00167832	OV_chr15	1	4	1	104	0.25	Non-promiscuous	Non-aggregation prone
SRP14_NPM1	SRP14	NPM1	0.274263	0.00254134	0.283799	0.00176137	OV_chr15	1	9	1	104	0.111111	Non-promiscuous	Non-aggregation prone
SRP14_RPL21	SRP14	RPL21	0.0880715	0.340865	0.282567	0.00184814	OV_chr15	1	4	1	104	0.25	Non-promiscuous	Non-aggregation prone
SRP14_RPL8	SRP14	RPL8	-0.0120068	0.896882	0.281392	0.00193448	OV_chr15	1	4	1	104	0.25	Non-promiscuous	Non-aggregation prone
SRP14_RPL37A	SRP14	RPL37A	0.193306	0.0351723	0.279412	0.00208826	OV_chr15	1	4	1	104	0.25	Non-promiscuous	Non-aggregation prone
SRP14_RPL3	SRP14	RPL3	0.047009	0.611681	0.277304	0.00226408	OV_chr15	1	3	1	104	0.333333	Non-promiscuous	Non-aggregation prone
SRP14_RPL14	SRP14	RPL14	0.47073	3.68797e-06	0.277096	0.00895903	COREAD_chr15	1	4	1	104	0.25	Non-promiscuous	Non-aggregation prone
SRP14_RPL32	SRP14	RPL32	0.188064	0.0405405	0.265297	0.00354618	OV_chr15	1	4	1	104	0.25	Non-promiscuous	Non-aggregation prone
SRP14_RPS15A	SRP14	RPS15A	0.323905	0.00208044	0.260254	0.0143312	COREAD_chr15	1	4	1	104	0.25	Non-promiscuous	Non-aggregation prone
SRP14_RPL5	SRP14	RPL5	0.218957	0.0167368	0.257777	0.00465005	OV_chr15	1	3	1	104	0.333333	Non-promiscuous	Non-aggregation prone
SRP14_NOLC1	SRP14	NOLC1	-0.0553838	0.549674	0.253668	0.00537491	OV_chr15	1	1	1	104	1	Non-promiscuous	Non-aggregation prone
SRP14_H1FX	SRP14	H1FX	0.0742416	0.422299	0.252322	0.00563335	OV_chr15	1	1	1	104	1	Non-promiscuous	Non-aggregation prone
SRP14_MYBBP1A	SRP14	MYBBP1A	-0.0632958	0.494055	0.248433	0.00644321	OV_chr15	1	3	1	104	0.333333	Non-promiscuous	Non-aggregation prone
SRP14_RPL7	SRP14	RPL7	0.156146	0.0899259	0.24698	0.00677135	OV_chr15	1	4	1	104	0.25	Non-promiscuous	Non-aggregation prone
SRP14_RPS18	SRP14	RPS18	0.320588	0.00037857	0.246275	0.00693588	OV_chr15	1	4	1	104	0.25	Non-promiscuous	Non-aggregation prone
SRP14_U2AF2	SRP14	U2AF2	-0.17046	0.0638163	0.244915	0.00726334	OV_chr15	1	4	1	104	0.25	Non-promiscuous	Non-aggregation prone
SRP14_RPS23	SRP14	RPS23	0.257114	0.00476063	0.244167	0.00744913	OV_chr15	1	4	1	104	0.25	Non-promiscuous	Non-aggregation prone
SRP14_RPL23A	SRP14	RPL23A	0.0503133	0.586851	0.241468	0.00815523	OV_chr15	1	3	1	104	0.333333	Non-promiscuous	Non-aggregation prone
SRP14_RPL6	SRP14	RPL6	0.186968	0.0417464	0.237901	0.00917903	OV_chr15	1	5	1	104	0.2	Non-promiscuous	Non-aggregation prone
SRP14_RPL11	SRP14	RPL11	0.150188	0.162509	0.237466	0.0258974	COREAD_chr15	1	4	1	104	0.25	Non-promiscuous	Non-aggregation prone
SRP14_RPS12	SRP14	RPS12	0.283037	0.00181459	0.233877	0.010468	OV_chr15	1	4	1	104	0.25	Non-promiscuous	Non-aggregation prone
SRP14_RPL29	SRP14	RPL29	0.0545008	0.556065	0.233193	0.0107021	OV_chr15	1	3	1	104	0.333333	Non-promiscuous	Non-aggregation prone
SRP14_RPL10A	SRP14	RPL10A	0.267597	0.00325908	0.232253	0.0110316	OV_chr15	1	4	1	104	0.25	Non-promiscuous	Non-aggregation prone
SRP14_RPL36A	SRP14	RPL36A	0.210789	0.0486886	0.231632	0.029897	COREAD_chr15	1	3	1	104	0.333333	Non-promiscuous	Non-aggregation prone
SRP14_RPS16	SRP14	RPS16	0.131669	0.153464	0.230167	0.0117948	OV_chr15	1	4	1	104	0.25	Non-promiscuous	Non-aggregation prone
SRP14_EBNA1BP2	SRP14	EBNA1BP2	0.554542	2.073e-08	0.22889	0.0319494	COREAD_chr15	1	1	1	104	1	Non-promiscuous	Non-aggregation prone
SRP14_EEF1A1	SRP14	EEF1A1	0.197059	0.0317076	-0.228757	0.0123363	OV_chr15	1	2	1	104	0.5	Non-promiscuous	Non-aggregation prone
SRP14_RBM28	SRP14	RBM28	0.111866	0.29943	0.22449	0.0354915	COREAD_chr15	1	1	1	104	1	Non-promiscuous	Non-aggregation prone
SRP14_RPL13	SRP14	RPL13	0.153497	0.0955803	0.222604	0.0149619	OV_chr15	1	4	1	104	0.25	Non-promiscuous	Non-aggregation prone
SRP14_SRPK1	SRP14	SRPK1	0.347733	0.000901377	0.222045	0.0375974	COREAD_chr15	1	3	1	104	0.333333	Non-promiscuous	Non-aggregation prone
SRP14_TCOF1	SRP14	TCOF1	-0.133898	0.146561	0.206815	0.0240249	OV_chr15	1	1	1	104	1	Non-promiscuous	Non-aggregation prone
SRP14_DDX21	SRP14	DDX21	0.468775	4.09682e-06	0.206629	0.0534167	COREAD_chr15	1	4	1	104	0.25	Non-promiscuous	Non-aggregation prone
SRP14_YBX1	SRP14	YBX1	0.513314	3.15379e-07	0.205601	0.054641	COREAD_chr15	1	6	1	104	0.166667	Non-promiscuous	Non-aggregation prone
SRP14_RPS7	SRP14	RPS7	0.272995	0.00266571	0.202977	0.0268327	OV_chr15	1	4	1	104	0.25	Non-promiscuous	Non-aggregation prone
SRP14_RPL15	SRP14	RPL15	0.134561	0.144556	0.188435	0.0401399	OV_chr15	1	4	1	104	0.25	Non-promiscuous	Non-aggregation prone
SRP14_RPLP2	SRP14	RPLP2	-0.0759748	0.481723	0.186382	0.0820887	COREAD_chr15	1	4	1	104	0.25	Non-promiscuous	Non-aggregation prone
SRP14_RPS15	SRP14	RPS15	-0.0170829	0.874479	-0.180957	0.0915616	COREAD_chr15	1	4	1	104	0.25	Non-promiscuous	Non-aggregation prone
SRP14_SLC25A5	SRP14	SLC25A5	-0.00291269	0.97492	-0.175716	0.0559404	OV_chr15	1	4	1	104	0.25	Non-promiscuous	Non-aggregation prone
SRP14_RPL9	SRP14	RPL9	0.241048	0.00827031	0.169784	0.0648928	OV_chr15	1	3	1	104	0.333333	Non-promiscuous	Non-aggregation prone
SRP14_NAP1L1	SRP14	NAP1L1	0.197878	0.0309912	0.165133	0.0726986	OV_chr15	1	1	1	104	1	Non-promiscuous	Non-aggregation prone
SRP14_RPL22	SRP14	RPL22	0.331637	0.0015974	0.164083	0.126612	COREAD_chr15	1	3	1	104	0.333333	Non-promiscuous	Non-aggregation prone
SRP14_RPLP0	SRP14	RPLP0	0.17051	0.0637375	0.16185	0.0786532	OV_chr15	1	3	1	104	0.333333	Non-promiscuous	Non-aggregation prone
SRP14_RPS29	SRP14	RPS29	0.211167	0.0211498	0.143776	0.121979	OV_chr15	1	4	1	104	0.25	Non-promiscuous	Non-aggregation prone
SRP14_EEF2	SRP14	EEF2	-0.0585397	0.587981	0.138176	0.199197	COREAD_chr15	1	1	1	104	1	Non-promiscuous	Non-aggregation prone
SRP14_RPL30	SRP14	RPL30	0.190365	0.0381057	0.129732	0.159658	OV_chr15	1	6	1	104	0.166667	Non-promiscuous	Non-aggregation prone
SRP14_RPS24	SRP14	RPS24	0.138257	0.133746	0.123145	0.18212	OV_chr15	1	4	1	104	0.25	Non-promiscuous	Non-aggregation prone
SRP14_PWP1	SRP14	PWP1	0.205576	0.0249024	0.114912	0.219331	OV_chr15	1	1	1	104	1	Non-promiscuous	Non-aggregation prone
SRP14_GNL3	SRP14	GNL3	-0.137124	0.13699	0.103625	0.262073	OV_chr15	1	1	1	104	1	Non-promiscuous	Non-aggregation prone
SRP14_BRIX1	SRP14	BRIX1	0.0917818	0.320832	0.101275	0.273107	OV_chr15	1	1	1	104	1	Non-promiscuous	Non-aggregation prone
SRP14_SCYL2	SRP14	SCYL2	0.470554	3.72317e-06	-0.0999806	0.354022	COREAD_chr15	1	1	1	104	1	Non-promiscuous	Non-aggregation prone
SRP14_TUFM	SRP14	TUFM	-0.0477616	0.658569	0.0874079	0.418063	COREAD_chr15	1	1	1	104	1	Non-promiscuous	Non-aggregation prone
SRP14_TUBB1	SRP14	TUBB1	-0.125488	0.17388	0.0267554	0.772705	OV_chr15	1	2	1	104	0.5	Non-promiscuous	Non-aggregation prone
EIF3J_EIF3A	EIF3J	EIF3A	0.236028	0.00976053	0.0765774	0.407807	OV_chr15	3	6	4	12	0.5	Non-promiscuous	Non-aggregation prone
EIF3J_EIF3B	EIF3J	EIF3B	0.202436	0.0272502	0.117056	0.204864	OV_chr15	4	9	4	12	0.444444	Non-promiscuous	Non-aggregation prone
EIF3J_EIF3C	EIF3J	EIF3C	0.26049	0.00422061	0.0375659	0.685027	OV_chr15	2	5	4	12	0.4	Non-promiscuous	Non-aggregation prone
EIF3J_EIF3D	EIF3J	EIF3D	0.0867754	0.348045	0.0592722	0.521964	OV_chr15	2	4	4	12	0.5	Non-promiscuous	Non-aggregation prone
EIF3J_EIF3E	EIF3J	EIF3E	0.275495	0.00242551	0.0158311	0.864315	OV_chr15	2	4	4	12	0.5	Non-promiscuous	Non-aggregation prone
EIF3J_EIF3F	EIF3J	EIF3F	0.153012	0.0966436	0.0294474	0.750552	OV_chr15	2	4	4	12	0.5	Non-promiscuous	Non-aggregation prone
EIF3J_EIF3G	EIF3J	EIF3G	0.0626691	0.498349	0.134952	0.14338	OV_chr15	3	7	4	12	0.428571	Non-promiscuous	Non-aggregation prone
EIF3J_EIF3H	EIF3J	EIF3H	0.21937	0.016527	0.0933841	0.31242	OV_chr15	2	4	4	12	0.5	Non-promiscuous	Non-aggregation prone
EIF3J_EIF3I	EIF3J	EIF3I	-0.0372881	0.687234	0.120745	0.190853	OV_chr15	4	7	4	12	0.571429	Non-promiscuous	Non-aggregation prone
EIF3J_EIF3K	EIF3J	EIF3K	-0.00843185	0.927484	-0.110917	0.229789	OV_chr15	2	4	4	12	0.5	Non-promiscuous	Non-aggregation prone
EIF3J_EIF3L	EIF3J	EIF3L	0.129925	0.159035	0.0270474	0.770293	OV_chr15	2	5	4	12	0.4	Non-promiscuous	Non-aggregation prone
EIF3J_EIF3M	EIF3J	EIF3M	0.147992	0.108226	-0.0267911	0.772411	OV_chr15	1	4	4	12	0.25	Non-promiscuous	Non-aggregation prone
EIF3J_EIF3L	EIF3J	EIF3L	0.129925	0.159035	0.0270474	0.770293	OV_chr15	2	5	4	12	0.4	Non-promiscuous	Non-aggregation prone
EIF3J_EIF3D	EIF3J	EIF3D	0.0867754	0.348045	0.0592722	0.521964	OV_chr15	2	4	4	12	0.5	Non-promiscuous	Non-aggregation prone
NOP10_DKC1	NOP10	DKC1	-0.10329	0.263626	0.830808	0	OV_chr15	1	1	1	6	1	Non-promiscuous	Non-aggregation prone
NOP10_GAR1	NOP10	GAR1	0.129006	0.162028	0.821734	0	OV_chr15	1	1	1	6	1	Non-promiscuous	Non-aggregation prone
NOP10_NHP2	NOP10	NHP2	0.337053	0.000178038	0.81332	0	OV_chr15	1	1	1	6	1	Non-promiscuous	Non-aggregation prone
NOP10_SMG6	NOP10	SMG6	-0.347906	0.000105758	-0.0055258	0.961452	OV_chr15	1	1	1	6	1	Non-promiscuous	Non-aggregation prone
NOP10_WRAP53	NOP10	WRAP53	-0.174412	0.0578147	0.440288	7.15824e-06	OV_chr15	1	1	1	6	1	Non-promiscuous	Non-aggregation prone
ANP32A_ANP32B	ANP32A	ANP32B	0.207627	0.0234644	0.739446	0	OV_chr15	3	5	5	9	0.6	Non-promiscuous	Non-aggregation prone
ANP32A_C1QBP	ANP32A	C1QBP	0.0344253	0.71013	0.216899	0.0178171	OV_chr15	2	9	5	9	0.222222	Non-promiscuous	Non-aggregation prone
ANP32A_PSMA1	ANP32A	PSMA1	-0.119078	0.197094	0.204942	0.0253618	OV_chr15	2	11	5	9	0.181818	Non-promiscuous	Non-aggregation prone
ANP32A_PSMA3	ANP32A	PSMA3	-0.0672625	0.467333	0.0960333	0.29883	OV_chr15	1	11	5	9	0.0909091	Non-promiscuous	Non-aggregation prone
ANP32A_PTMA	ANP32A	PTMA	0.257107	0.00476183	0.33669	0.000181109	OV_chr15	5	7	5	9	0.714286	Non-promiscuous	Non-aggregation prone
ANP32A_SLC25A3	ANP32A	SLC25A3	0.148875	0.106114	0.147864	0.108536	OV_chr15	2	5	5	9	0.4	Non-promiscuous	Non-aggregation prone
ANP32A_SLC25A5	ANP32A	SLC25A5	-0.0778023	0.400325	-0.0436263	0.637564	OV_chr15	1	8	5	9	0.125	Non-promiscuous	Non-aggregation prone
EDC3_DCP1A	EDC3	DCP1A	0.320674	0.000377131	0.308704	0.000708173	OV_chr15	1	3	1	4	0.333333	Non-promiscuous	Non-aggregation prone
EDC3_DCP2	EDC3	DCP2	0.223252	0.0146642	0.273734	0.0874209	OV_chr15	1	3	1	4	0.333333	Non-promiscuous	Non-aggregation prone
EDC3_DDX6	EDC3	DDX6	0.46759	8.25343e-08	0.168039	0.0677374	OV_chr15	1	2	1	4	0.5	Non-promiscuous	Non-aggregation prone
EDC3_EDC4	EDC3	EDC4	0.57823	5.72453e-12	0.131214	0.154905	OV_chr15	1	1	1	4	1	Non-promiscuous	Non-aggregation prone
CHMP1B_CHMP1A	CHMP1B	CHMP1A	0.06921	0.482963	0.826933	0	BRCA_chr18	1	1	1	9	1	Non-promiscuous	Non-aggregation prone
CHMP1B_CHMP2B	CHMP1B	CHMP2B	0.188472	0.0541747	0.859932	0	BRCA_chr18	1	1	1	9	1	Non-promiscuous	Non-aggregation prone
CHMP1B_CHMP1A	CHMP1B	CHMP1A	0.06921	0.482963	0.826933	0	BRCA_chr18	1	1	1	9	1	Non-promiscuous	Non-aggregation prone
CHMP1B_CHMP2A	CHMP1B	CHMP2A	0.0585113	0.553252	0.772289	0	BRCA_chr18	1	1	1	9	1	Non-promiscuous	Non-aggregation prone
CHMP1B_CHMP4B	CHMP1B	CHMP4B	0.159361	0.104415	0.766349	0	BRCA_chr18	1	1	1	9	1	Non-promiscuous	Non-aggregation prone
CHMP1B_CHMP4A	CHMP1B	CHMP4A	-0.0787062	0.424822	0.735258	0	BRCA_chr18	1	1	1	9	1	Non-promiscuous	Non-aggregation prone
CHMP1B_CHMP4C	CHMP1B	CHMP4C	0.248186	0.0106868	0.676146	2.44249e-15	BRCA_chr18	1	1	1	9	1	Non-promiscuous	Non-aggregation prone
CHMP1B_CHMP3	CHMP1B	CHMP3	0.174435	0.0751248	0.514918	1.91181e-08	BRCA_chr18	1	1	1	9	1	Non-promiscuous	Non-aggregation prone
CHMP1B_CHMP5	CHMP1B	CHMP5	0.246631	0.0112041	-0.155152	0.114017	BRCA_chr18	1	1	1	9	1	Non-promiscuous	Non-aggregation prone
CHMP1B_CHMP6	CHMP1B	CHMP6	0.371058	3.26208e-05	-0.131687	0.168294	OV_chr18	1	1	1	9	1	Non-promiscuous	Non-aggregation prone
CHMP1A_CHMP2A	CHMP1A	CHMP2A	0.0100484	0.91363	0.0908702	0.325682	OV_chr16	1	1	1	9	1	Non-promiscuous	Non-aggregation prone
CHMP1A_CHMP2B	CHMP1A	CHMP2B	0.163374	0.075842	0.162527	0.0773951	OV_chr16	1	1	1	9	1	Non-promiscuous	Non-aggregation prone
CHMP1A_CHMP3	CHMP1A	CHMP3	0.240607	0.00839278	0.0233182	0.802935	OV_chr16	1	1	1	9	1	Non-promiscuous	Non-aggregation prone
CHMP1A_CHMP4A	CHMP1A	CHMP4A	-0.154059	0.0943565	-0.0743769	0.421451	OV_chr16	1	1	1	9	1	Non-promiscuous	Non-aggregation prone
CHMP1A_CHMP4B	CHMP1A	CHMP4B	0.190293	0.0381792	0.0511822	0.5804	OV_chr16	1	1	1	9	1	Non-promiscuous	Non-aggregation prone
CHMP1A_CHMP4C	CHMP1A	CHMP4C	-0.019577	0.832633	-0.00691489	0.946975	OV_chr16	1	1	1	9	1	Non-promiscuous	Non-aggregation prone
CHMP1A_CHMP5	CHMP1A	CHMP5	0.217398	0.0175501	0.0317619	0.731666	OV_chr16	1	1	1	9	1	Non-promiscuous	Non-aggregation prone
CHMP1A_CHMP6	CHMP1A	CHMP6	-0.0028842	0.975165	-0.133652	0.161976	OV_chr16	1	1	1	9	1	Non-promiscuous	Non-aggregation prone
GLG1_CHUK	GLG1	CHUK	0.439453	5.73122e-07	0.0880459	0.378875	OV_chr16	1	22	1	16	0.0454545	Non-promiscuous	Non-aggregation prone
[truncated: 2,707 more rows]
