# Supplementary material for: Regulation of protein complex partners as a compensatory mechanism in aneuploid tumors
Source: eLife. 2022 May 16;11:e75526. doi: 10.7554/eLife.75526 (PMC9135399; doi:10.7554/eLife.75526)
Supplement: Supplementary file 6. [file elife-75526-supp6.xlsx]

## Sheet: Amplification cases
GO.ID	Case	pvalue	Stdres	GO.description	Annotation
GO:0000075	BRCA_chr5	0.00953141	2.85484	cell cycle checkpoint	enrichment
GO:0000398	BRCA_chr20	0.00436936	3.31848	mRNA splicing, via spliceosome	enrichment
GO:0003723	COREAD_chr20	0.0102668	2.72104	RNA binding	enrichment
GO:0003723	BRCA_chr20	0.000850872	3.53074	RNA binding	enrichment
GO:0005515	BRCA_chr20	0.0216145	-2.48618	protein binding	depletion
GO:0005634	BRCA_chr20	4.96624e-08	5.55535	nucleus	enrichment
GO:0005634	COREAD_chr20	2.29066e-05	4.33178	nucleus	enrichment
GO:0005694	COREAD_chr20	0.0261838	2.58873	chromosome	enrichment
GO:0005737	BRCA_chr5	0.00364268	3.08595	cytoplasm	enrichment
GO:0005737	BRCA_chr20	1.57222e-07	5.45853	cytoplasm	enrichment
GO:0005743	BRCA_chr5	0.00233741	3.3221	mitochondrial inner membrane	enrichment
GO:0005759	BRCA_chr20	0.0129225	2.92432	mitochondrial matrix	enrichment
GO:0005759	BRCA_chr5	0.00380292	3.36138	mitochondrial matrix	enrichment
GO:0005759	COREAD_chr20	0.0204076	2.74602	mitochondrial matrix	enrichment
GO:0006119	BRCA_chr5	0.00506261	3.09405	oxidative phosphorylation	enrichment
GO:0006260	BRCA_chr20	6.54508e-05	4.18524	DNA replication	enrichment
GO:0006260	COREAD_chr20	0.0309468	2.38248	DNA replication	enrichment
GO:0006265	BRCA_chr5	2.94247e-05	-4.30158	DNA topological change	depletion
GO:0006265	BRCA_chr20	8.27262e-05	-4.09721	DNA topological change	depletion
GO:0006352	BRCA_chr21	0.0142667	2.85172	DNA-templated transcription, initiation	enrichment
GO:0006354	BRCA_chr5	0.00435194	3.2508	DNA-templated transcription, elongation	enrichment
GO:0006364	COREAD_chr20	0.0101719	3.10904	rRNA processing	enrichment
GO:0006396	COREAD_chr20	0.0103273	2.83123	RNA processing	enrichment
GO:0006396	BRCA_chr20	0.0238078	2.53389	RNA processing	enrichment
GO:0006397	BRCA_chr20	0.00436936	3.31848	mRNA processing	enrichment
GO:0006412	BRCA_chr20	6.82335e-05	4.27719	translation	enrichment
GO:0006412	BRCA_chr5	4.09938e-06	4.91997	translation	enrichment
GO:0006412	COREAD_chr20	0.000197327	4.00961	translation	enrichment
GO:0006461	BRCA_chr5	0.000777463	3.55322	protein complex assembly	enrichment
GO:0006461	BRCA_chr20	0.00159517	3.53165	protein complex assembly	enrichment
GO:0006818	BRCA_chr5	0.00506261	3.09405	hydrogen transport	enrichment
GO:0006974	BRCA_chr20	0.0498131	2.15258	cellular response to DNA damage stimulus	enrichment
GO:0006974	COREAD_chr20	9.55175e-05	4.1079	cellular response to DNA damage stimulus	enrichment
GO:0007169	COREAD_chr20	0.0453393	-2.24662	transmembrane receptor protein tyrosine kinase signaling pathway	depletion
GO:0008380	BRCA_chr21	0.0248516	2.41703	RNA splicing	enrichment
GO:0008380	BRCA_chr5	0.00210037	3.27787	RNA splicing	enrichment
GO:0008380	BRCA_chr20	8.97658e-09	5.97288	RNA splicing	enrichment
GO:0009060	BRCA_chr5	0.00506261	3.09405	aerobic respiration	enrichment
GO:0016567	COREAD_chr20	0.000312078	3.90917	protein ubiquitination	enrichment
GO:0022904	BRCA_chr5	0.00506261	3.09405	respiratory electron transport chain	enrichment
GO:0030182	COREAD_chr20	0.0261838	2.58873	neuron differentiation	enrichment
GO:0032774	BRCA_chr20	0.0160808	2.78193	RNA biosynthetic process	enrichment
GO:0042254	COREAD_chr20	0.0073478	3.13703	ribosome biogenesis	enrichment
GO:0045893	BRCA_chr20	0.00811178	-2.85393	positive regulation of transcription, DNA-templated	depletion
GO:0046777	BRCA_chr5	0.00938541	2.98029	protein autophosphorylation	enrichment
GO:0051276	BRCA_chr20	0.0346182	-2.26587	chromosome organization	depletion
GO:0051276	BRCA_chr5	0.000313747	-3.72573	chromosome organization	depletion

## Sheet: Deletion cases
GO.ID	Case	pvalue	Stdres	GO.description	Annotation
GO:0000075	BRCA_chr15	0.0011655	-3.44255	cell cycle checkpoint	depletion
GO:0000075	BRCA_chr22	0.00112517	3.44667	cell cycle checkpoint	enrichment
GO:0000398	BRCA_chr17	0.0150795	3.41976	mRNA splicing, via spliceosome	enrichment
GO:0003677	BRCA_chr17	0.00567923	-2.95803	DNA binding	depletion
GO:0003677	BRCA_chr22	3.31538e-06	4.75303	DNA binding	enrichment
GO:0003723	BRCA_chr22	0.0421014	2.16929	RNA binding	enrichment
GO:0003723	BRCA_chr17	4.62492e-13	7.56639	RNA binding	enrichment
GO:0005515	BRCA_chr15	0.00135444	-3.35858	protein binding	depletion
GO:0005634	BRCA_chr14	0.00471443	2.90451	nucleus	enrichment
GO:0005634	BRCA_chr22	0.000367118	3.64453	nucleus	enrichment
GO:0005634	COREAD_chr15	0.0392688	-2.23929	nucleus	depletion
GO:0005634	BRCA_chr15	0.000133211	3.88434	nucleus	enrichment
GO:0005737	BRCA_chr17	9.61873e-18	8.84128	cytoplasm	enrichment
GO:0005759	COREAD_chr15	0.00633277	3.13137	mitochondrial matrix	enrichment
GO:0005759	BRCA_chr17	1.89237e-10	7.15325	mitochondrial matrix	enrichment
GO:0005769	BRCA_chr13	0.0474816	2.32487	early endosome	enrichment
GO:0005783	BRCA_chr14	0.00246755	3.3907	endoplasmic reticulum	enrichment
GO:0005886	BRCA_chr15	0.0239351	-2.56175	plasma membrane	depletion
GO:0005929	BRCA_chr4	0.0425552	2.3174	cilium	enrichment
GO:0005929	BRCA_chr22	0.0206651	2.7465	cilium	enrichment
GO:0006265	BRCA_chr4	0.00669431	-2.82761	DNA topological change	depletion
GO:0006265	BRCA_chr18	9.24836e-11	-6.58376	DNA topological change	depletion
GO:0006265	BRCA_chr13	2.45861e-07	5.26105	DNA topological change	enrichment
GO:0006265	BRCA_chr15	4.82668e-11	6.64305	DNA topological change	enrichment
GO:0006281	BRCA_chr22	1.48318e-06	4.93304	DNA repair	enrichment
GO:0006281	BRCA_chr15	1.04919e-06	-5.01765	DNA repair	depletion
GO:0006308	BRCA_chr22	2.36084e-07	5.487	DNA catabolic process	enrichment
GO:0006351	BRCA_chr18	0.00458743	2.98796	transcription, DNA-templated	enrichment
GO:0006351	BRCA_chr15	0.000801077	3.53233	transcription, DNA-templated	enrichment
GO:0006351	BRCA_chr13	0.0484694	-2.27101	transcription, DNA-templated	depletion
GO:0006352	BRCA_chr15	0.0182164	2.50253	DNA-templated transcription, initiation	enrichment
GO:0006352	BRCA_chr14	6.5403e-16	8.25037	DNA-templated transcription, initiation	enrichment
GO:0006355	BRCA_chr15	0.00136144	3.29369	regulation of transcription, DNA-templated	enrichment
GO:0006355	BRCA_chr14	0.0046845	2.94684	regulation of transcription, DNA-templated	enrichment
GO:0006355	BRCA_chr22	0.0147766	-2.58147	regulation of transcription, DNA-templated	depletion
GO:0006396	BRCA_chr14	0.0281855	2.51307	RNA processing	enrichment
GO:0006396	BRCA_chr17	0.00026039	4.29291	RNA processing	enrichment
GO:0006397	BRCA_chr17	0.0150795	3.41976	mRNA processing	enrichment
GO:0006412	BRCA_chr17	1.83573e-28	11.553	translation	enrichment
GO:0006412	COREAD_chr15	0.00101162	3.5842	translation	enrichment
GO:0006413	BRCA_chr22	0.000169457	4.01871	translational initiation	enrichment
GO:0006417	BRCA_chr17	1.03823e-05	5.39835	regulation of translation	enrichment
GO:0006461	BRCA_chr17	1.43061e-05	4.77015	protein complex assembly	enrichment
GO:0006468	BRCA_chr13	0.0253961	-2.46235	protein phosphorylation	depletion
GO:0006468	BRCA_chr14	0.0461795	2.22065	protein phosphorylation	enrichment
GO:0006468	BRCA_chr22	0.00459887	3.04596	protein phosphorylation	enrichment
GO:0006476	BRCA_chr15	2.71132e-07	5.23191	protein deacetylation	enrichment
GO:0006476	BRCA_chr13	1.78349e-05	4.41795	protein deacetylation	enrichment
GO:0006476	BRCA_chr14	0.00742754	-2.8358	protein deacetylation	depletion
GO:0006476	BRCA_chr18	1.71758e-09	-6.15965	protein deacetylation	depletion
GO:0006476	BRCA_chr4	0.0298687	-2.29999	protein deacetylation	depletion
GO:0006511	BRCA_chr22	0.00118098	-3.43059	ubiquitin-dependent protein catabolic process	depletion
GO:0006511	BRCA_chr4	1.7643e-10	6.55289	ubiquitin-dependent protein catabolic process	enrichment
GO:0006511	BRCA_chr13	0.0451153	-2.14748	ubiquitin-dependent protein catabolic process	depletion
GO:0006511	BRCA_chr15	0.0329975	-2.34798	ubiquitin-dependent protein catabolic process	depletion
GO:0006511	BRCA_chr14	0.0443766	2.22554	ubiquitin-dependent protein catabolic process	enrichment
GO:0006906	COREAD_chr15	4.25729e-08	5.69779	vesicle fusion	enrichment
GO:0006950	BRCA_chr14	0.000173962	4.11751	response to stress	enrichment
GO:0006974	BRCA_chr22	3.92823e-08	5.61769	cellular response to DNA damage stimulus	enrichment
GO:0006974	BRCA_chr15	2.67695e-07	-5.27719	cellular response to DNA damage stimulus	depletion
GO:0007059	BRCA_chr15	0.0101763	-2.82214	chromosome segregation	depletion
GO:0007155	BRCA_chr15	0.000978532	-3.51746	cell adhesion	depletion
GO:0007179	BRCA_chr18	0.000548195	3.56706	transforming growth factor beta receptor signaling pathway	enrichment
GO:0007219	BRCA_chr4	0.0050888	3.06308	Notch signaling pathway	enrichment
GO:0007249	BRCA_chr22	0.0126021	-2.68197	I-kappaB kinase/NF-kappaB signaling	depletion
GO:0008380	BRCA_chr22	0.00888644	2.80132	RNA splicing	enrichment
GO:0008380	BRCA_chr17	1.71445e-13	7.72616	RNA splicing	enrichment
GO:0009299	BRCA_chr22	0.00879899	2.93835	mRNA transcription	enrichment
GO:0015031	BRCA_chr15	0.0402886	-2.33031	protein transport	depletion
GO:0016079	COREAD_chr15	4.31029e-08	5.71099	synaptic vesicle exocytosis	enrichment
GO:0016192	BRCA_chr18	0.000118066	4.0699	vesicle-mediated transport	enrichment
GO:0016485	BRCA_chr14	0.00217479	3.47904	protein processing	enrichment
GO:0016504	BRCA_chr14	0.00978557	3.11653	peptidase activator activity	enrichment
GO:0016567	BRCA_chr4	8.2749e-07	5.1122	protein ubiquitination	enrichment
GO:0016567	BRCA_chr22	0.00226547	-3.23374	protein ubiquitination	depletion
GO:0016573	BRCA_chr14	0.00636686	2.9776	histone acetylation	enrichment
GO:0016575	BRCA_chr13	0.0218559	2.51021	histone deacetylation	enrichment
GO:0032774	BRCA_chr17	1.29884e-05	4.74596	RNA biosynthetic process	enrichment
GO:0032774	BRCA_chr15	0.0453059	2.19374	RNA biosynthetic process	enrichment
GO:0035556	BRCA_chr17	0.0338576	3.02537	intracellular signal transduction	enrichment
GO:0042254	BRCA_chr17	0.00456921	3.94138	ribosome biogenesis	enrichment
GO:0043067	BRCA_chr14	0.0267351	2.70925	regulation of programmed cell death	enrichment
GO:0043161	BRCA_chr4	1.46342e-05	4.56392	proteasome-mediated ubiquitin-dependent protein catabolic process	enrichment
GO:0043161	BRCA_chr14	2.01951e-05	4.48962	proteasome-mediated ubiquitin-dependent protein catabolic process	enrichment
GO:0045892	BRCA_chr13	0.000313664	3.71116	negative regulation of transcription, DNA-templated	enrichment
GO:0045892	BRCA_chr18	3.27672e-06	-4.76524	negative regulation of transcription, DNA-templated	depletion
GO:0045892	BRCA_chr14	0.00479159	-2.95791	negative regulation of transcription, DNA-templated	depletion
GO:0045892	BRCA_chr15	4.04957e-06	4.69055	negative regulation of transcription, DNA-templated	enrichment
GO:0046777	BRCA_chr22	6.50414e-05	4.2583	protein autophosphorylation	enrichment
GO:0048255	BRCA_chr17	0.000646211	4.68719	mRNA stabilization	enrichment
GO:0048489	COREAD_chr15	4.31029e-08	5.71099	synaptic vesicle transport	enrichment
GO:0051276	BRCA_chr15	3.53261e-06	4.70405	chromosome organization	enrichment
GO:0051276	BRCA_chr13	2.54514e-06	4.80356	chromosome organization	enrichment
GO:0051276	BRCA_chr18	9.7463e-13	-7.24329	chromosome organization	depletion
GO:0051276	BRCA_chr4	0.00250875	-3.13782	chromosome organization	depletion
GO:0055070	BRCA_chr13	0.00696773	2.9746	copper ion homeostasis	enrichment
GO:2001141	BRCA_chr15	0.00278481	3.09135	regulation of RNA biosynthetic process	enrichment
GO:2001141	BRCA_chr14	0.000355649	3.69737	regulation of RNA biosynthetic process	enrichment
GO:2001141	BRCA_chr22	0.0345922	-2.2738	regulation of RNA biosynthetic process	depletion
