# Supplementary figures and images for: Regulation of protein complex partners as a compensatory mechanism in aneuploid tumors
Source: eLife journal article supplement (doi:10.7554/elife.75526), 2022-05-16

A

## Overlap with partner proteins

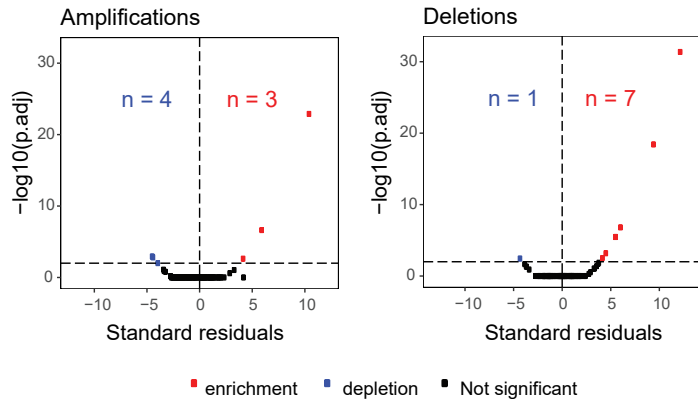

B

## Overlap with complex proteins

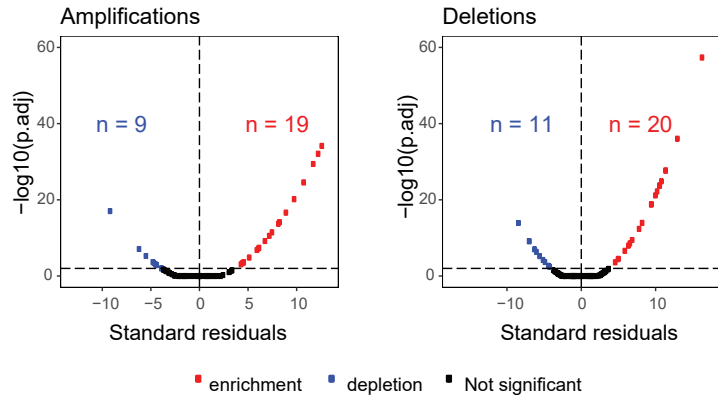

Supplement: supp [file elife-75526-supp-v1.zip]

**A**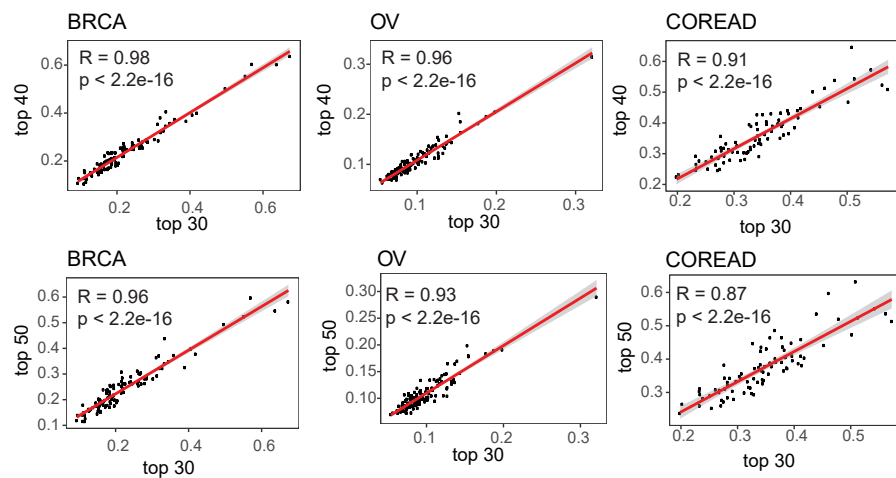**B**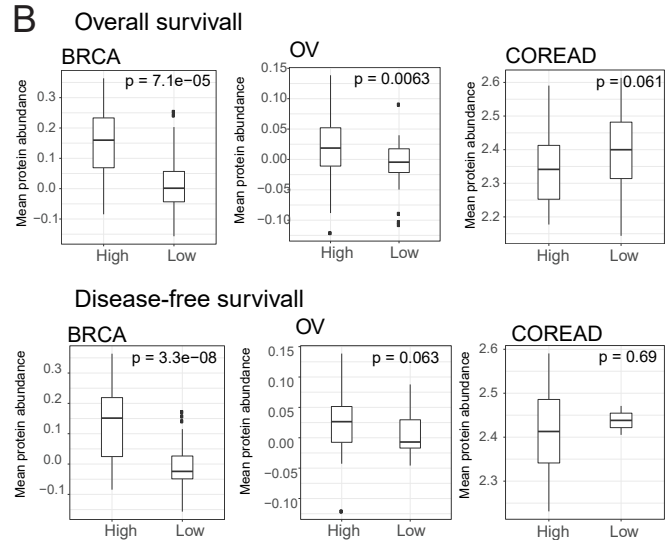**C**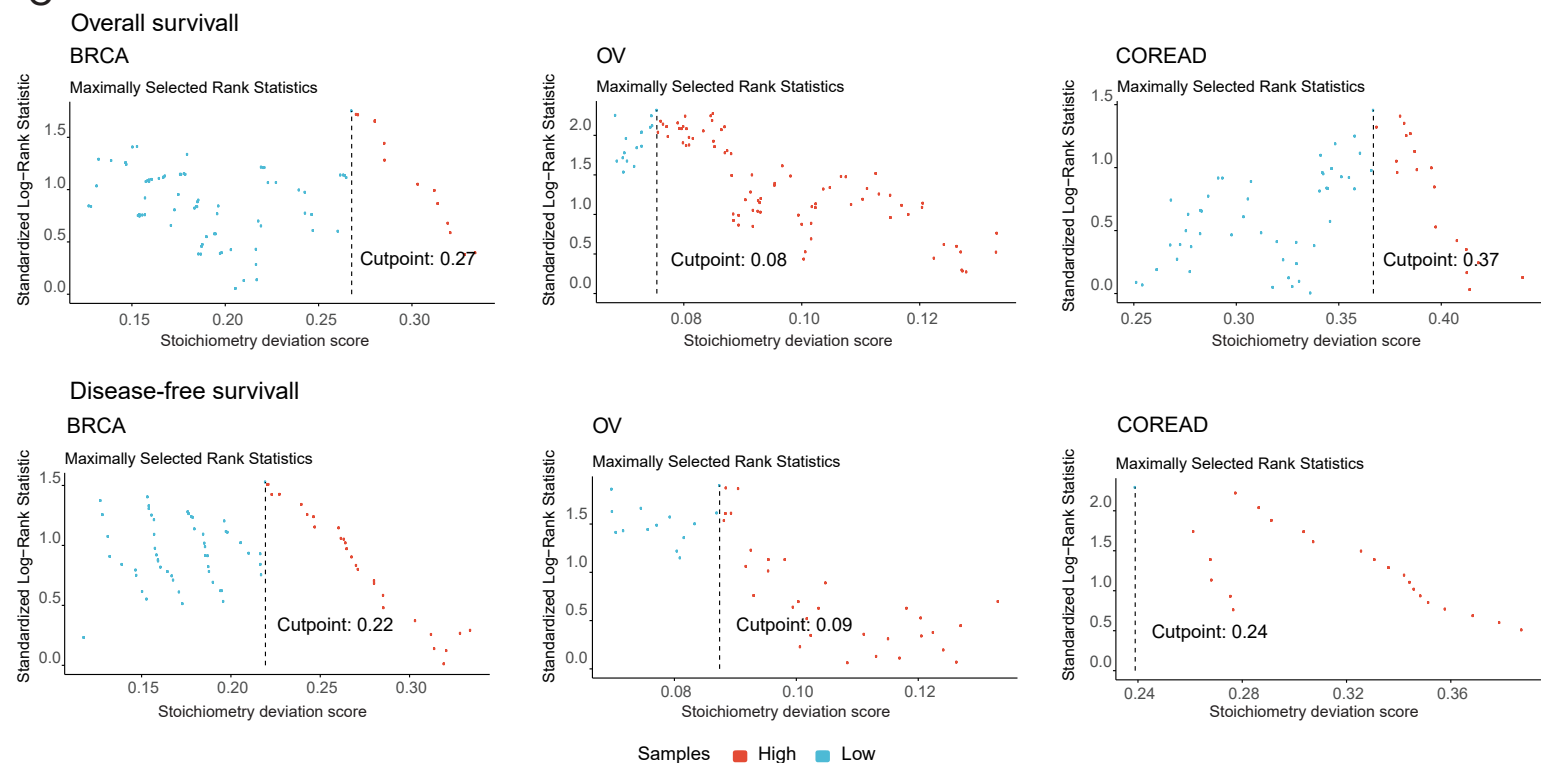**D**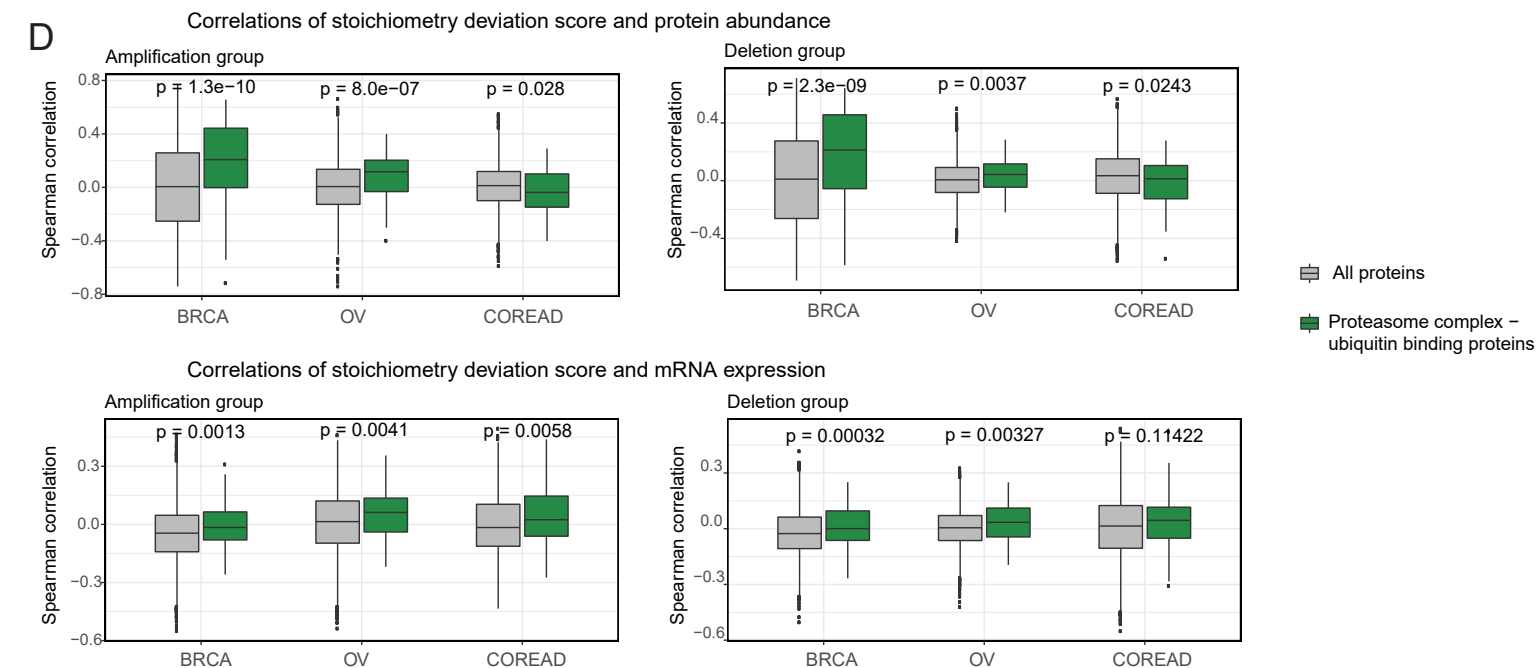

Supplement: supp [file elife-75526-supp-v1.zip]

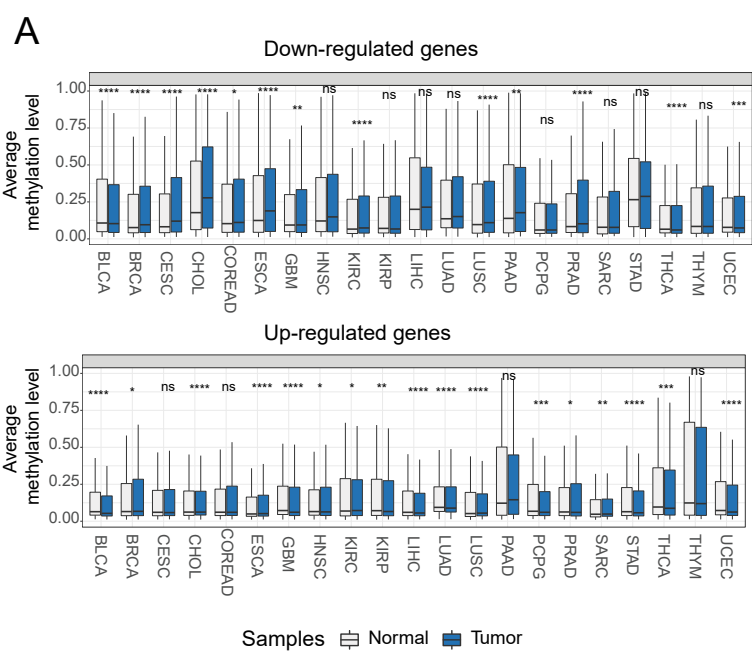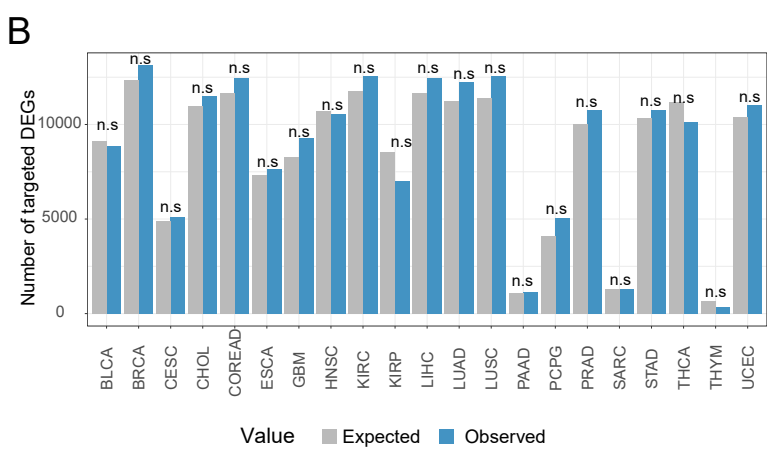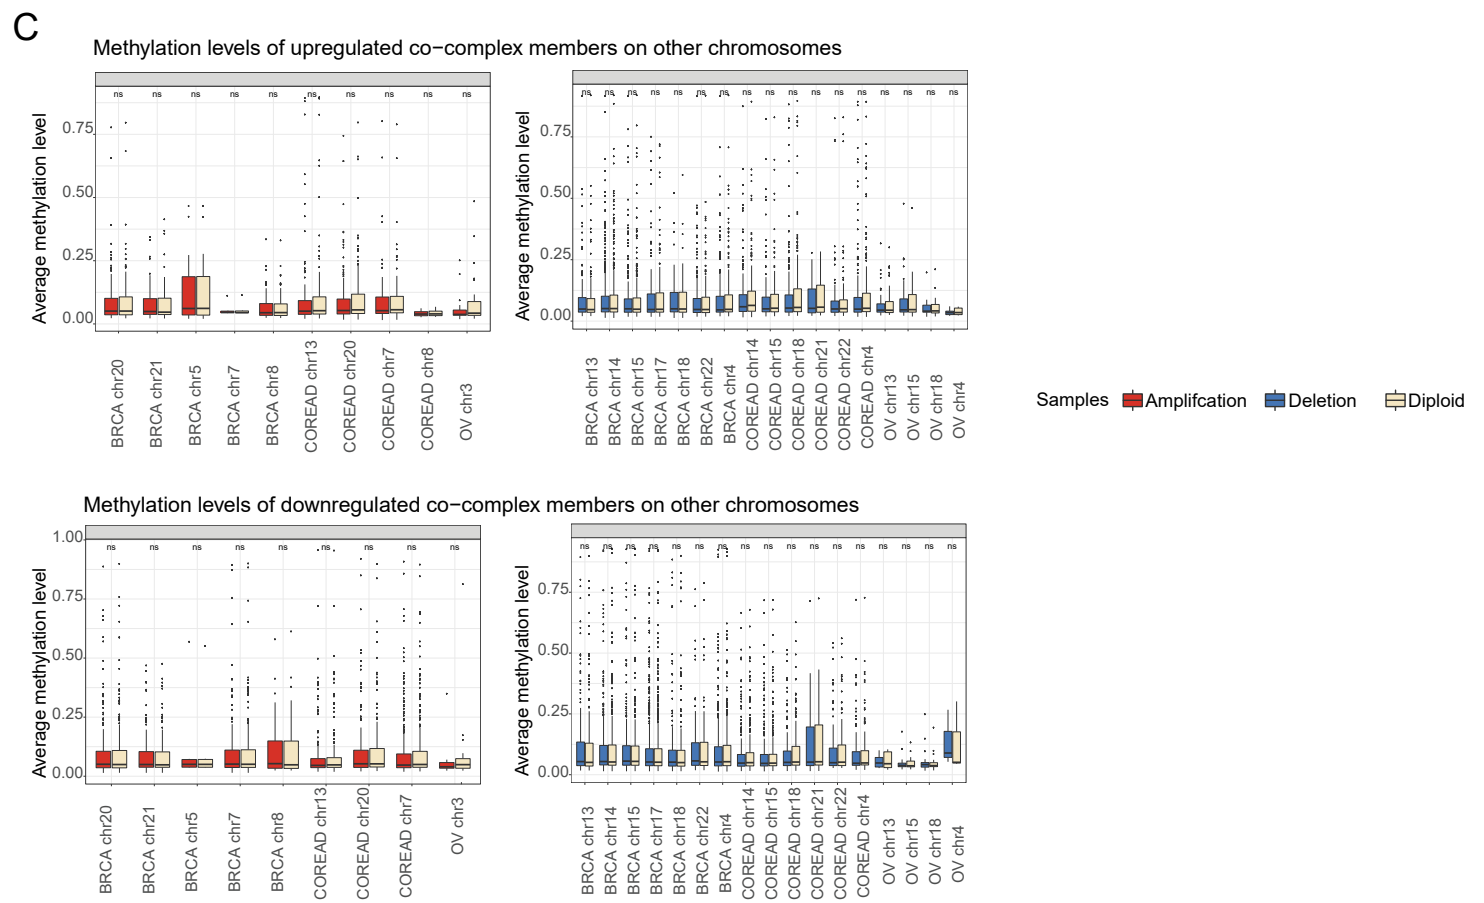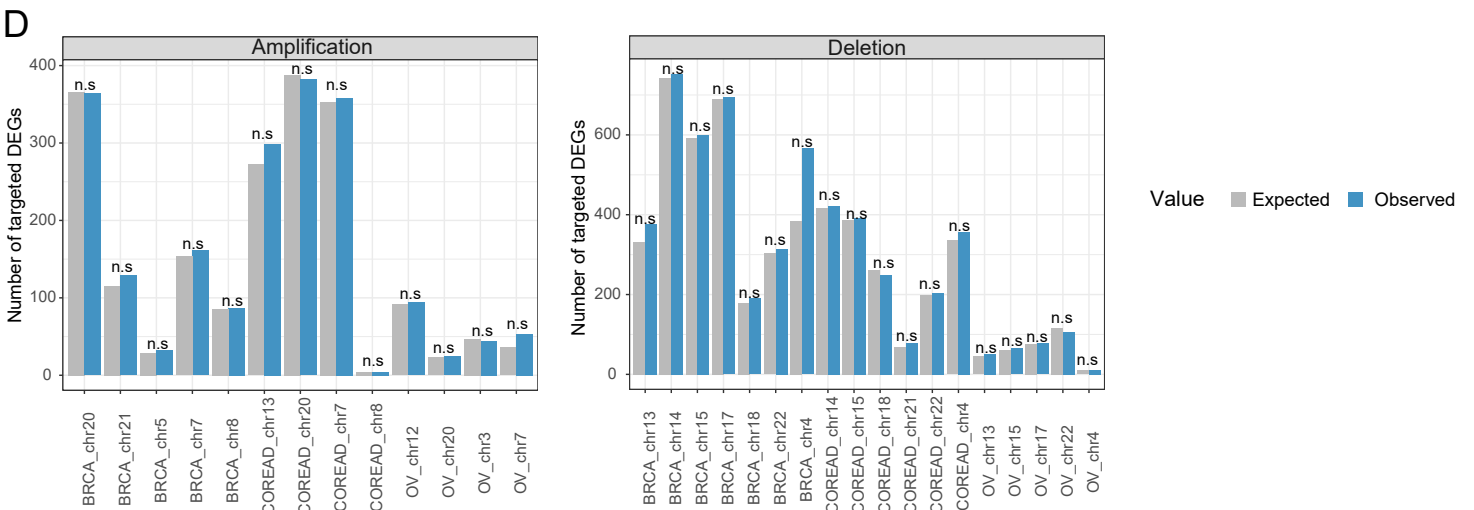

Supplement: supp [file elife-75526-supp-v1.zip]

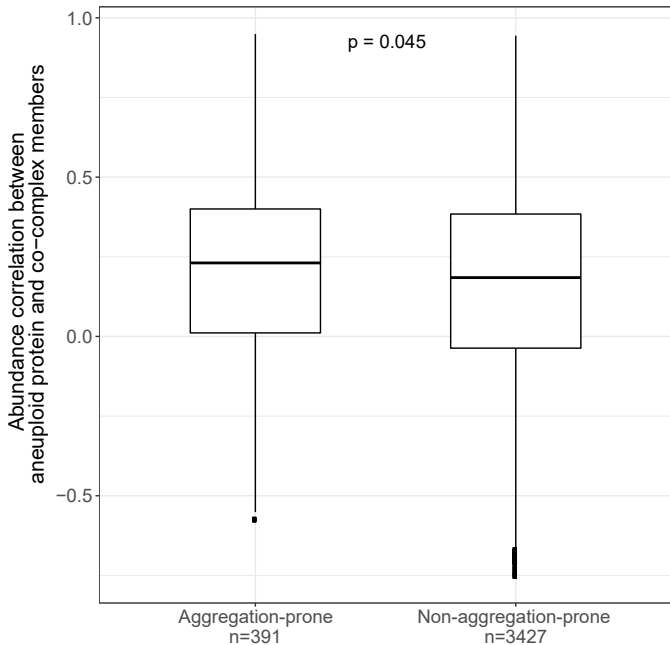

Supplement: supp [file elife-75526-supp-v1.zip]
